# Supplementary material for: Microbial bioenergetics of coral-algal interactions
Source: PeerJ. 2017 Jun 21;5:e3423. doi: 10.7717/peerj.3423 (PMC5482263; doi:10.7717/peerj.3423)
Supplement: Data S5 — Raw data exported from the TAM III calorimeter for the third experimental replicate. [file peerj-05-3423-s010.xls]

## Sheet: Experiment info
Summary
Name	OPtode tank 1 Initial dark (6-14-13).rslt
Start time	2013-06-14 00:37:41
End time	2013-06-14 10:02:53
Operator	Roach
Results file path	C:\Users\Frohwer\Desktop\Roach\OPtode tank 1 Initial dark (6-14-13).rslt
General Experiment Info
Bath temperature	26°C
	Sample - Ch 1:1	Sample - Ch 1:2	Sample - Ch 1:3	Sample - Ch 1:4	Sample - Ch 1:5	Sample - Ch 1:6
Total mass	3.0123g	3.0434g	2.9761g	3.0684g	3.0777g	3.0013g
Name	sigma	coral 1 Initial Dark	Algae 1 Initial Dark	Interface Initial 1 Dark	Tank Initial 1 Dark	.02 Filtered

## Sheet: Raw data
2013-06-14 00:56:41	Temperature [Temperature]	Heat flow [Signal, Ch 1:1]	Heat [Signal, Ch 1:1]	Normalized heat flow [Signal, Ch 1:1]	Normalized heat [Signal, Ch 1:1]	Heat flow [Signal, Ch 1:2]	Heat [Signal, Ch 1:2]	Normalized heat flow [Signal, Ch 1:2]	Normalized heat [Signal, Ch 1:2]	Heat flow [Signal, Ch 1:3]	Heat [Signal, Ch 1:3]	Normalized heat flow [Signal, Ch 1:3]	Normalized heat [Signal, Ch 1:3]	Heat flow [Signal, Ch 1:4]	Heat [Signal, Ch 1:4]	Normalized heat flow [Signal, Ch 1:4]	Normalized heat [Signal, Ch 1:4]	Heat flow [Signal, Ch 1:5]	Heat [Signal, Ch 1:5]	Normalized heat flow [Signal, Ch 1:5]	Normalized heat [Signal, Ch 1:5]	Heat flow [Signal, Ch 1:6]	Heat [Signal, Ch 1:6]	Normalized heat flow [Signal, Ch 1:6]	Normalized heat [Signal, Ch 1:6]	Time markers
s	°C	W	J	W/g	J/g	W	J	W/g	J/g	W	J	W/g	J/g	W	J	W/g	J/g	W	J	W/g	J/g	W	J	W/g	J/g
-1130	26	-2.26189e-07		-7.50886e-08		-1.04816e-07		-3.44405e-08		-5.51542e-08		-1.85324e-08		8.23716e-09		2.68451e-09		7.90111e-10		2.56721e-10		-7.52346e-08		-2.50673e-08
-1120	26	-2.20229e-07		-7.31098e-08		-1.08508e-07		-3.56536e-08		-4.66017e-08		-1.56586e-08		1.59321e-08		5.19231e-09		-5.43617e-09		-1.76631e-09		-7.0715e-08		-2.35614e-08
-1110	26	-2.27439e-07		-7.55034e-08		-1.09462e-07		-3.59671e-08		-3.23431e-08		-1.08676e-08		2.64824e-08		8.63068e-09		5.24399e-10		1.70387e-10		-7.31799e-08		-2.43827e-08
-1100	26	-2.15927e-07		-7.16819e-08		-1.03741e-07		-3.40872e-08		-3.80297e-08		-1.27784e-08		3.67209e-08		1.19674e-08		-5.3076e-10		-1.72454e-10		-8.48273e-08		-2.82635e-08
-1090	26	-2.11089e-07		-7.00758e-08		-1.09313e-07		-3.59179e-08		-4.2696e-08		-1.43463e-08		2.6314e-08		8.57581e-09		-5.01548e-09		-1.62962e-09		-8.18206e-08		-2.72617e-08
-1080	26	-2.00081e-07		-6.64212e-08		-1.22724e-07		-4.03246e-08		-4.30029e-08		-1.44494e-08		3.50075e-08		1.1409e-08		-1.2978e-08		-4.21678e-09		-6.15887e-08		-2.05207e-08
-1070	26	-1.96894e-07		-6.53632e-08		-1.15558e-07		-3.79699e-08		-4.07527e-08		-1.36933e-08		3.20318e-08		1.04392e-08		-2.11899e-08		-6.88497e-09		-6.20972e-08		-2.06901e-08
-1060	26	-1.85304e-07		-6.15157e-08		-9.38752e-08		-3.08455e-08		-5.27635e-08		-1.77291e-08		2.69963e-08		8.79818e-09		-2.60613e-08		-8.46777e-09		-5.132e-08		-1.70993e-08
-1050	26	-1.90232e-07		-6.31516e-08		-7.83219e-08		-2.5735e-08		-6.37114e-08		-2.14077e-08		2.19618e-08		7.15741e-09		-2.46577e-08		-8.01175e-09		-4.33794e-08		-1.44536e-08
-1040	26	-1.79554e-07		-5.96069e-08		-6.86486e-08		-2.25565e-08		-4.69834e-08		-1.57869e-08		1.98294e-08		6.46247e-09		-1.54722e-08		-5.02721e-09		-3.94832e-08		-1.31554e-08
-1030	26	-1.6444e-07		-5.45896e-08		-7.217e-08		-2.37136e-08		-3.49061e-08		-1.17288e-08		1.45938e-08		4.75615e-09		-2.02918e-08		-6.59318e-09		-3.95641e-08		-1.31823e-08
-1020	26	-1.7006e-07		-5.64552e-08		-7.78088e-08		-2.55664e-08		-2.0726e-08		-6.96416e-09		5.3088e-09		1.73015e-09		-2.0691e-08		-6.72287e-09		-4.32478e-08		-1.44097e-08
-1010	26	-1.60659e-07		-5.33343e-08		-7.85653e-08		-2.5815e-08		-2.7459e-08		-9.22651e-09		-1.29012e-09		-4.20453e-10		-1.58737e-08		-5.15765e-09		-3.80469e-08		-1.26768e-08
-1000	26	-1.60594e-07		-5.33128e-08		-7.70141e-08		-2.53053e-08		-2.56035e-08		-8.60302e-09		6.15957e-09		2.00742e-09		-1.31027e-08		-4.25732e-09		-3.05259e-08		-1.01709e-08
-990	26	-1.57664e-07		-5.23401e-08		-7.41539e-08		-2.43655e-08		-1.6843e-08		-5.65942e-09		1.05443e-08		3.4364e-09		-1.89658e-08		-6.16233e-09		-2.51019e-08		-8.36367e-09
-980	26	-1.53676e-07		-5.10163e-08		-5.66611e-08		-1.86177e-08		-9.827e-09		-3.30197e-09		1.17609e-08		3.83291e-09		-2.46873e-08		-8.02135e-09		-2.26974e-08		-7.56252e-09
-970	26	-1.30867e-07		-4.34441e-08		-6.04497e-08		-1.98625e-08		-9.81765e-09		-3.29883e-09		5.01471e-09		1.63431e-09		-2.34182e-08		-7.609e-09		-1.41241e-08		-4.706e-09
-960	26	-1.22577e-07		-4.06922e-08		-7.36346e-08		-2.41948e-08		-1.01604e-08		-3.414e-09		-1.26433e-09		-4.12048e-10		-3.09601e-08		-1.00595e-08		-2.97174e-09		-9.90152e-10
-950	26	-1.15278e-07		-3.8269e-08		-6.67063e-08		-2.19183e-08		1.67667e-09		5.6338e-10		-1.25396e-09		-4.08669e-10		-2.3783e-08		-7.72751e-09		2.40878e-09		8.02578e-10
-940	26	-1.03886e-07		-3.44872e-08		-7.13181e-08		-2.34337e-08		6.45445e-09		2.16876e-09		-4.08434e-09		-1.3311e-09		-1.30215e-08		-4.23092e-09		7.11551e-09		2.37081e-09
-930	26	-7.7769e-08		-2.58172e-08		-5.82265e-08		-1.91321e-08		5.71879e-09		1.92157e-09		-7.05634e-09		-2.29968e-09		-6.40774e-09		-2.08199e-09		1.5506e-08		5.16644e-09
-920	26	-6.26913e-08		-2.08118e-08		-4.30513e-08		-1.41458e-08		-9.77661e-09		-3.28504e-09		-1.56138e-08		-5.08859e-09		-7.20191e-09		-2.34003e-09		2.76469e-08		9.21163e-09
-910	26	-3.57129e-08		-1.18557e-08		-3.55715e-08		-1.16881e-08		-8.62462e-09		-2.89796e-09		-2.49806e-08		-8.14126e-09		-3.56903e-09		-1.15964e-09		2.66675e-08		8.88532e-09
-900	26	-2.94531e-08		-9.77763e-09		-3.61724e-08		-1.18855e-08		7.04239e-09		2.36631e-09		-3.66497e-08		-1.19442e-08		-1.18557e-09		-3.85212e-10		3.8373e-08		1.27855e-08
-890	26	-2.02547e-08		-6.72398e-09		-4.37013e-08		-1.43594e-08		2.8297e-08		9.50809e-09		-3.58457e-08		-1.16822e-08		-3.76175e-09		-1.22226e-09		3.7798e-08		1.25939e-08
-880	26	4.92236e-09		1.63409e-09		-3.33245e-08		-1.09498e-08		3.49195e-08		1.17333e-08		-1.69763e-08		-5.53263e-09		-1.49723e-08		-4.86476e-09		3.7819e-08		1.26009e-08
-870	26	8.7617e-09		2.90864e-09		-2.23239e-08		-7.33517e-09		2.50351e-08		8.41204e-09		-6.52915e-09		-2.12787e-09		-2.99526e-08		-9.73213e-09		3.82174e-08		1.27336e-08
-860	26	9.56772e-09		3.17622e-09		-4.50945e-09		-1.48172e-09		1.59163e-08		5.34805e-09		-5.20764e-09		-1.69718e-09		-3.57478e-08		-1.16151e-08		2.81907e-08		9.39281e-09
-850	26	9.27317e-09		3.07844e-09		-1.51222e-08		-4.96886e-09		-6.21962e-09		-2.08986e-09		-1.19881e-08		-3.90695e-09		-3.64645e-08		-1.1848e-08		3.3273e-08		1.10862e-08
-840	26	1.65382e-08		5.49022e-09		-9.77687e-09		-3.21248e-09		-1.4148e-08		-4.75388e-09		-1.47909e-08		-4.8204e-09		-2.96166e-08		-9.62295e-09		3.75044e-08		1.2496e-08
-830	26	3.05815e-08		1.01522e-08		3.15216e-09		1.03574e-09		-8.18881e-09		-2.75152e-09		-1.32366e-08		-4.31383e-09		-2.59943e-08		-8.44603e-09		2.51471e-08		8.37873e-09
-820	26	4.81456e-08		1.5983e-08		-1.24334e-09		-4.08538e-10		-1.88106e-08		-6.32055e-09		-3.5677e-09		-1.16272e-09		-2.79412e-08		-9.07858e-09		9.55538e-09		3.18375e-09
-810	26	4.76368e-08		1.58141e-08		-2.85168e-08		-9.37003e-09		-2.13925e-08		-7.1881e-09		-7.69218e-09		-2.5069e-09		-3.11202e-08		-1.01115e-08		1.10034e-08		3.6662e-09
-800	26	5.39388e-08		1.79062e-08		-1.49203e-08		-4.9025e-09		-3.16255e-08		-1.06265e-08		-6.09405e-09		-1.98607e-09		-2.55068e-08		-8.28761e-09		2.99847e-09		9.99056e-10
-790	26	5.08877e-08		1.68933e-08		-1.14191e-08		-3.75208e-09		-3.29002e-08		-1.10548e-08		4.65844e-09		1.5182e-09		-8.97757e-09		-2.91697e-09		1.23247e-08		4.10647e-09
-780	26	3.79524e-08		1.25992e-08		-8.17676e-09		-2.68672e-09		-3.32109e-08		-1.11592e-08		9.54864e-10		3.11193e-10		-1.05763e-08		-3.43642e-09		1.36295e-08		4.54121e-09
-770	26	3.00715e-08		9.98289e-09		-1.26919e-08		-4.17032e-09		-3.05896e-08		-1.02784e-08		-3.38253e-10		-1.10237e-10		-3.82871e-10		-1.24402e-10		1.25629e-08		4.18583e-09
-760	26	2.94395e-08		9.77309e-09		-8.91908e-09		-2.93063e-09		-2.83633e-08		-9.53037e-09		4.50443e-09		1.468e-09		6.51859e-09		2.11801e-09		2.48916e-08		8.29362e-09
-750	26	3.31919e-08		1.10188e-08		-1.05743e-08		-3.47449e-09		-1.75087e-08		-5.88309e-09		6.13883e-09		2.00066e-09		1.02732e-08		3.33795e-09		2.18233e-08		7.27129e-09
-740	26	3.7536e-08		1.24609e-08		-1.76487e-09		-5.79902e-10		-3.00756e-08		-1.01057e-08		1.05302e-08		3.43181e-09		2.03908e-08		6.62534e-09		2.37041e-08		7.89794e-09
-730	26	3.95233e-08		1.31206e-08		-7.35231e-09		-2.41582e-09		-2.5063e-08		-8.42144e-09		1.01106e-08		3.29508e-09		1.92726e-08		6.26202e-09		3.69556e-08		1.23132e-08
-720	26	3.8221e-08		1.26883e-08		-5.5402e-09		-1.8204e-09		-1.72201e-08		-5.78613e-09		-9.08782e-09		-2.96175e-09		2.52806e-08		8.21412e-09		3.66025e-08		1.21956e-08
-710	26	2.42101e-08		8.03707e-09		-1.17837e-09		-3.87187e-10		-1.45689e-08		-4.89529e-09		1.18847e-09		3.87324e-10		2.28813e-08		7.43456e-09		2.93577e-08		9.78166e-09
-700	26	1.8052e-08		5.99277e-09		8.27308e-09		2.71837e-09		-1.4434e-08		-4.84998e-09		3.83452e-09		1.24968e-09		1.95649e-08		6.357e-09		1.57183e-08		5.23716e-09
-690	26	3.61664e-08		1.20062e-08		-1.17891e-09		-3.87365e-10		-4.94009e-09		-1.65992e-09		-5.8119e-09		-1.89412e-09		2.22819e-08		7.23978e-09		3.22763e-10		1.07541e-10
-680	26	4.79406e-08		1.5915e-08		-1.36664e-09		-4.49049e-10		-1.35044e-08		-4.5376e-09		-1.98785e-08		-6.47844e-09		2.36775e-08		7.69324e-09		9.35365e-09		3.11653e-09
-670	26	4.1201e-08		1.36776e-08		1.70574e-09		5.6047e-10		-3.05085e-09		-1.02512e-09		-1.19226e-08		-3.8856e-09		1.86353e-08		6.05494e-09		5.78573e-09		1.92774e-09
-660	26	3.46372e-08		1.14986e-08		-5.3616e-09		-1.76171e-09		1.21615e-08		4.08637e-09		-1.25402e-08		-4.08689e-09		1.31662e-08		4.27795e-09		2.27401e-09		7.57675e-10
-650	26	4.26717e-08		1.41658e-08		-2.9613e-09		-9.73022e-10		1.77337e-08		5.95872e-09		-1.05735e-08		-3.44593e-09		2.31736e-08		7.52951e-09		1.30347e-11		4.34301e-12
-640	26	3.85411e-08		1.27946e-08		2.80134e-09		9.20463e-10		8.94127e-09		3.00436e-09		-2.03723e-08		-6.6394e-09		2.56627e-08		8.33826e-09		-5.81512e-09		-1.93753e-09
-630	26	3.63319e-08		1.20612e-08		1.96745e-08		6.46463e-09		8.45606e-09		2.84132e-09		-2.15038e-08		-7.00814e-09		2.38316e-08		7.7433e-09		5.64186e-09		1.8798e-09
-620	26	4.27447e-08		1.41901e-08		2.28536e-08		7.50923e-09		1.26246e-08		4.24198e-09		-1.31139e-08		-4.27385e-09		2.12008e-08		6.88852e-09		-2.66133e-09		-8.86726e-10
-610	26	3.96803e-08		1.31728e-08		3.19021e-08		1.04824e-08		1.40202e-08		4.71093e-09		-1.52816e-09		-4.98033e-10		2.10506e-08		6.83971e-09		-1.59009e-08		-5.29801e-09
-600	26	4.65442e-08		1.54514e-08		2.96642e-08		9.74705e-09		9.26337e-09		3.11259e-09		7.48346e-10		2.43888e-10		2.24176e-08		7.28387e-09		-1.2614e-08		-4.20283e-09
-590	26	5.95608e-08		1.97725e-08		4.20461e-08		1.38155e-08		1.9943e-09		6.70106e-10		-1.37817e-08		-4.49151e-09		2.35645e-08		7.65654e-09		-1.17315e-08		-3.90879e-09
-580	26	5.97897e-08		1.98485e-08		5.03325e-08		1.65383e-08		4.96782e-09		1.66924e-09		1.58593e-09		5.16858e-10		1.76041e-08		5.71989e-09		-1.0266e-08		-3.42051e-09
-570	26	6.23202e-08		2.06886e-08		5.62367e-08		1.84783e-08		-5.38728e-10		-1.81018e-10		2.11204e-09		6.88319e-10		2.17915e-08		7.08044e-09		-1.13254e-08		-3.77351e-09
-560	26	4.86709e-08		1.61574e-08		5.54388e-08		1.82161e-08		-8.77418e-09		-2.94821e-09		-6.10267e-09		-1.98888e-09		2.32939e-08		7.56861e-09		-1.59475e-08		-5.31353e-09
-550	26	5.61626e-08		1.86444e-08		5.39388e-08		1.77232e-08		-7.22698e-09		-2.42834e-09		-1.97201e-10		-6.42683e-11		1.1396e-08		3.70278e-09		-7.86779e-09		-2.62146e-09
-540	26	5.08774e-08		1.68899e-08		5.15101e-08		1.69252e-08		1.20195e-08		4.03868e-09		4.63593e-09		1.51086e-09		1.0652e-08		3.46103e-09		4.02835e-09		1.3422e-09
-530	26	5.02945e-08		1.66964e-08		4.92571e-08		1.61849e-08		6.07609e-09		2.04163e-09		4.00356e-09		1.30477e-09		4.57198e-09		1.48552e-09		-8.53589e-09		-2.84406e-09
-520	26	6.1898e-08		2.05484e-08		4.29955e-08		1.41274e-08		1.48174e-08		4.97881e-09		9.83598e-09		3.20557e-09		1.02285e-08		3.32343e-09		-1.13814e-08		-3.79216e-09
-510	26	6.54995e-08		2.1744e-08		4.04254e-08		1.3283e-08		1.46262e-08		4.91455e-09		1.18028e-08		3.84657e-09		1.06846e-08		3.47163e-09		-8.66608e-09		-2.88744e-09
-500	26	7.28438e-08		2.41821e-08		5.3212e-08		1.74844e-08		1.72953e-08		5.81139e-09		1.37133e-08		4.46919e-09		8.38609e-09		2.72479e-09		-3.30684e-09		-1.1018e-09
-490	26	8.58107e-08		2.84868e-08		4.20335e-08		1.38114e-08		1.27747e-08		4.29245e-09		3.24843e-08		1.05867e-08		3.86655e-09		1.25631e-09		-1.2167e-08		-4.05392e-09
-480	26	9.93051e-08		3.29665e-08		4.2692e-08		1.40277e-08		2.49924e-08		8.3977e-09		2.06125e-08		6.71767e-09		8.14556e-09		2.64664e-09		-2.763e-08		-9.206e-09
-470	26	8.40957e-08		2.79174e-08		6.0365e-08		1.98347e-08		2.33767e-08		7.85481e-09		1.57147e-08		5.12148e-09		6.50677e-09		2.11417e-09		-2.21098e-08		-7.36674e-09
-460	26	7.79323e-08		2.58714e-08		6.26715e-08		2.05926e-08		3.61471e-08		1.21458e-08		1.51233e-08		4.92871e-09		1.75192e-08		5.69231e-09		-5.06097e-09		-1.68626e-09
-450	26	8.94103e-08		2.96817e-08		6.73596e-08		2.2133e-08		3.64131e-08		1.22352e-08		5.73885e-09		1.87031e-09		2.19996e-08		7.14807e-09		-6.37092e-12		-2.12272e-12
-440	26	9.40008e-08		3.12056e-08		8.06179e-08		2.64894e-08		3.55955e-08		1.19605e-08		-1.18329e-08		-3.85637e-09		2.45493e-08		7.9765e-09		9.86369e-09		3.28647e-09
-430	26	9.33027e-08		3.09739e-08		7.93272e-08		2.60653e-08		3.38488e-08		1.13736e-08		-7.10732e-09		-2.31629e-09		2.28749e-08		7.43247e-09		2.59072e-08		8.63198e-09
-420	26	1.02589e-07		3.40567e-08		6.28706e-08		2.0658e-08		3.63203e-08		1.2204e-08		-9.98707e-09		-3.25481e-09		1.90732e-08		6.19724e-09		2.29695e-08		7.65319e-09
-410	26	9.82261e-08		3.26083e-08		6.1713e-08		2.02776e-08		2.2451e-08		7.54376e-09		-9.02716e-09		-2.94198e-09		1.54042e-09		5.00511e-10		2.85454e-08		9.51102e-09
-400	26	8.02255e-08		2.66326e-08		6.49547e-08		2.13428e-08		3.0285e-08		1.01761e-08		4.75153e-09		1.54854e-09		4.28122e-09		1.39104e-09		2.63162e-08		8.76828e-09
-390	26	7.58522e-08		2.51808e-08		8.23344e-08		2.70534e-08		3.2629e-08		1.09637e-08		1.1295e-08		3.68108e-09		8.83244e-09		2.86982e-09		2.79753e-08		9.32106e-09
-380	26	7.72674e-08		2.56506e-08		9.80999e-08		3.22336e-08		2.10379e-08		7.06895e-09		-1.05893e-08		-3.45109e-09		2.42798e-08		7.88893e-09		1.80412e-08		6.01113e-09
-370	26	8.75055e-08		2.90494e-08		1.02415e-07		3.36516e-08		2.11171e-08		7.09555e-09		1.15839e-08		3.77524e-09		1.92736e-08		6.26234e-09		2.57545e-08		8.58112e-09
-360	26	8.47527e-08		2.81355e-08		9.86506e-08		3.24146e-08		2.89206e-08		9.7176e-09		2.22257e-08		7.24341e-09		2.56042e-08		8.31928e-09		3.54928e-08		1.18258e-08
-350	26	8.19287e-08		2.71981e-08		8.41367e-08		2.76456e-08		3.01838e-08		1.01421e-08		1.81495e-08		5.91496e-09		2.69476e-08		8.75577e-09		4.43399e-08		1.47736e-08
-340	26	9.93048e-08		3.29664e-08		6.76875e-08		2.22408e-08		3.50903e-08		1.17907e-08		2.13572e-08		6.96037e-09		1.93753e-08		6.29539e-09		3.61314e-08		1.20386e-08
-330	26	1.05388e-07		3.4986e-08		7.13465e-08		2.3443e-08		4.3243e-08		1.45301e-08		1.89827e-08		6.18652e-09		9.20419e-09		2.99061e-09		2.53319e-08		8.44031e-09
-320	26	1.03898e-07		3.44912e-08		6.92003e-08		2.27378e-08		4.36956e-08		1.46822e-08		1.21869e-08		3.97174e-09		4.49257e-10		1.45972e-10		9.08216e-09		3.02608e-09
-310	26	1.06352e-07		3.53059e-08		6.4012e-08		2.10331e-08		4.14467e-08		1.39265e-08		1.10033e-08		3.586e-09		-1.12744e-08		-3.66326e-09		4.16491e-09		1.3877e-09
-300	26	9.76228e-08		3.24081e-08		5.4779e-08		1.79993e-08		3.12308e-08		1.04939e-08		-5.42705e-09		-1.76869e-09		-1.46758e-08		-4.76842e-09		3.17766e-08		1.05876e-08
-290	26	9.12833e-08		3.03035e-08		5.02953e-08		1.6526e-08		3.28529e-08		1.10389e-08		-3.05269e-09		-9.94881e-10		-3.04895e-09		-9.90659e-10		2.96617e-08		9.88295e-09
-280	26	8.64627e-08		2.87032e-08		4.53104e-08		1.48881e-08		3.1544e-08		1.05991e-08		-1.5645e-08		-5.09874e-09		-7.91862e-09		-2.5729e-09		1.60217e-08		5.33825e-09
-270	26	8.68886e-08		2.88446e-08		3.71341e-08		1.22015e-08		2.76454e-08		9.28913e-09		-3.2159e-08		-1.04807e-08		-9.68248e-09		-3.14601e-09		2.45966e-08		8.19532e-09
-260	26	7.27684e-08		2.41571e-08		2.45795e-08		8.07631e-09		1.97169e-08		6.62507e-09		-5.22956e-08		-1.70433e-08		-1.88585e-08		-6.12747e-09		1.98408e-08		6.61074e-09
-250	26	5.77215e-08		1.91619e-08		5.9097e-09		1.94181e-09		2.48593e-08		8.35297e-09		-5.54417e-08		-1.80686e-08		-3.41748e-08		-1.1104e-08		-3.27175e-09		-1.09011e-09
-240	26
-230	26
-220	26
-210	26
-200	26
-190	26
-180	26
-170	26
-160	26
-150	26
-140	26
-130	26
-120	26
-110	26
-100	26
-90	26
-80	26
-70	26
-60	26
-50	26
-40	26
-30	26
-20	26
-10	26
0	26																									Reaction start
10	26
20	26
30	26
40	26
50	26
60	26
70	26
80	26
90	26
100	26
110	26
120	26
130	26
140	26
150	26
160	26
170	26
180	26
190	26
200	26
210	26
220	26
230	26
240	26
250	26
260	26
270	26
280	26
290	26
300	26
310	26
320	26
330	26
340	26
350	26
360	26
370	26
380	26
390	26
400	26
410	26
420	26
430	26
440	26
450	26
460	26
470	26
480	26
490	26
500	26
510	26
520	26
530	26
540	26
550	26
560	26
570	26
580	26
590	26
600	26
610	26
620	26
630	26
640	26
650	26
660	26
670	26
680	26
690	26
700	26
710	26
720	26
730	26
740	26
750	26
760	26
770	26
780	26
790	26
800	26
810	26
820	26
830	26
840	26
850	26
860	26
870	26
880	26
890	26
900	26
910	26
920	26
930	26
940	26
950	26
960	26
970	26
980	26
990	26																									Measuring position
1000	26
1010	26
1020	26
1030	26
1040	26
1050	26
1060	26
1070	26
1080	26
1090	26
1100	26
1110	26
1120	26
1130	26
1140	26
1150	26
1160	26
1170	26
1180	26
1190	26
1200	26
1210	26
1220	26
1230	26
1240	26
1250	26
1260	26
1270	26
1280	26
1290	26
1300	26
1310	26
1320	26
1330	26
1340	26
1350	26
1360	26
1370	26
1380	26
1390	26
1400	26
1410	26
1420	26
1430	26
1440	26
1450	26
1460	26
1470	26
1480	26
1490	26
1500	26
1510	26
1520	26
1530	26
1540	26
1550	26
1560	26
1570	26
1580	26
1590	26
1600	26
1610	26
1620	26
1630	26
1640	26
1650	26
1660	26
1670	26
1680	26
1690	26
1700	26
1710	26
1720	26
1730	26
1740	26
1750	26
1760	26
1770	26
1780	26
1790	26
1800	26
1810	26
1820	26
1830	26
1840	26
1850	26
1860	26
1870	26
1880	26
1890	26
1900	26
1910	26
1920	26
1930	26
1940	26
1950	26
1960	26
1970	26
1980	26
1990	26
2000	26
2010	26
2020	26
2030	26
2040	26
2050	26
2060	26
2070	26
2080	26
2090	26
2100	26
2110	26
2120	26
2130	26
2140	26
2150	26
2160	26
2170	26
2180	26
2190	26
2200	26
2210	26
2220	26
2230	26
2240	26
2250	26
2260	26
2270	26
2280	26
2290	26
2300	26
2310	26
2320	26
2330	26
2340	26
2350	26
2360	26
2370	26
2380	26
2390	26
2400	26
2410	26
2420	26
2430	26
2440	26
2450	26
2460	26
2470	26
2480	26
2490	26
2500	26
2510	26
2520	26
2530	26
2540	26
2550	26
2560	26
2570	26
2580	26
2590	26
2600	26
2610	26
2620	26
2630	26
2640	26
2650	26
2660	26
2670	26
2680	26
2690	26
2700	26
2710	26
2720	26
2730	26
2740	26
2750	26
2760	26
2770	26
2780	26
2790	26
2800	26
2810	26
2820	26
2830	26
2840	26
2850	26
2860	26
2870	26
2880	26
2890	26
2900	26
2910	26
2920	26
2930	26
2940	26
2950	26
2960	26
2970	26
2980	26
2990	26
3000	26
3010	26
3020	26
3030	26
3040	26
3050	26
3060	26
3070	26
3080	26
3090	26
3100	26
3110	26
3120	26
3130	26
3140	26
3150	26
3160	26
3170	26
3180	26
3190	26
3200	26
3210	26
3220	26
3230	26
3240	26
3250	26
3260	26
3270	26
3280	26
3290	26
3300	26
3310	26
3320	26
3330	26
3340	26
3350	26
3360	26
3370	26
3380	26
3390	26
3400	26
3410	26
3420	26
3430	26
3440	26
3450	26
3460	26
3470	26
3480	26
3490	26
3500	26
3510	26
3520	26
3530	26
3540	26
3550	26
3560	26
3570	26
3580	26
3590	26
3600	26
3610	26
3620	26
3630	26
3640	26
3650	26
3660	26
3670	26
3680	26
3690	26	6.29608e-08	4.57675e-07	2.09012e-08	1.51936e-07	5.42608e-07	4.23344e-06	1.7829e-07	1.39102e-06	-0.000167983	-0.00130727	-5.64441e-05	-0.000439257	1.1359e-06	8.82912e-06	3.70194e-07	2.87743e-06	6.94295e-07	5.36506e-06	2.25589e-07	1.7432e-06	1.11989e-07	8.45521e-07	3.73136e-08	2.81718e-07	Signal correct
3700	26	7.03137e-08	1.11509e-06	2.33422e-08	3.70179e-07	5.65346e-07	9.79215e-06	1.85761e-07	3.2175e-06	-0.000167796	-0.00298613	-5.6381e-05	-0.00100337	1.13139e-06	2.01971e-05	3.68723e-07	6.58229e-06	7.01906e-07	1.23426e-05	2.28062e-07	4.01033e-06	1.05702e-07	1.92926e-06	3.52188e-08	6.42809e-07
3710	26	6.89797e-08	1.79631e-06	2.28993e-08	5.96324e-07	5.66834e-07	1.54437e-05	1.8625e-07	5.07448e-06	-0.000167593	-0.00466305	-5.63129e-05	-0.00156683	1.12687e-06	3.14766e-05	3.67249e-07	1.02583e-05	7.16911e-07	1.94271e-05	2.32937e-07	6.31221e-06	1.2377e-07	3.08095e-06	4.12388e-08	1.02654e-06
3720	26	6.7598e-08	2.48251e-06	2.24407e-08	8.24126e-07	5.70688e-07	2.11412e-05	1.87517e-07	6.94658e-06	-0.000167396	-0.00633802	-5.62468e-05	-0.00212964	1.12473e-06	4.27384e-05	3.66553e-07	1.39285e-05	7.08144e-07	2.65695e-05	2.30089e-07	8.63291e-06	1.35768e-07	4.38618e-06	4.52365e-08	1.46143e-06
3730	26	7.0499e-08	3.16813e-06	2.34037e-08	1.05173e-06	5.78291e-07	2.68789e-05	1.90015e-07	8.83187e-06	-0.000167183	-0.00801091	-5.61751e-05	-0.00269175	1.13736e-06	5.40485e-05	3.70669e-07	1.76146e-05	7.10466e-07	3.36554e-05	2.30843e-07	1.09352e-05	1.30489e-07	5.72174e-06	4.34773e-08	1.90642e-06
3740	26	8.72576e-08	3.95843e-06	2.89671e-08	1.31409e-06	5.86023e-07	3.27149e-05	1.92555e-07	1.07495e-05	-0.000166983	-0.00968172	-5.61079e-05	-0.00325316	1.11975e-06	6.53233e-05	3.64929e-07	2.1289e-05	7.07751e-07	4.07423e-05	2.29961e-07	1.32379e-05	1.33809e-07	7.0315e-06	4.45836e-08	2.34282e-06
3750	26	1.05312e-07	4.90752e-06	3.49605e-08	1.62916e-06	6.019e-07	3.8653e-05	1.97772e-07	1.27006e-05	-0.000166793	-0.0113506	-5.60441e-05	-0.00381393	1.11407e-06	7.64941e-05	3.63079e-07	2.49296e-05	7.04656e-07	4.78033e-05	2.28955e-07	1.55321e-05	1.33447e-07	8.3736e-06	4.44629e-08	2.78999e-06
3760	26	1.20765e-07	6.04156e-06	4.00908e-08	2.00563e-06	6.04814e-07	4.46805e-05	1.9873e-07	1.46811e-05	-0.000166599	-0.0130175	-5.59791e-05	-0.00437403	1.10747e-06	8.75953e-05	3.60927e-07	2.85476e-05	7.02737e-07	5.48275e-05	2.28332e-07	1.78145e-05	1.44152e-07	9.76816e-06	4.803e-08	3.25464e-06
3770	26	1.35246e-07	7.32062e-06	4.48978e-08	2.43024e-06	6.18518e-07	5.07962e-05	2.03232e-07	1.66906e-05	-0.000166407	-0.0146826	-5.59145e-05	-0.00493351	1.10648e-06	9.86572e-05	3.60606e-07	3.21527e-05	7.148e-07	6.19153e-05	2.32252e-07	2.01174e-05	1.39788e-07	1.1194e-05	4.65757e-08	3.72973e-06
3780	26	1.48521e-07	8.74232e-06	4.93048e-08	2.90221e-06	6.20344e-07	5.69941e-05	2.03833e-07	1.87271e-05	-0.000166208	-0.0163457	-5.58476e-05	-0.00549232	1.12604e-06	0.000109816	3.6698e-07	3.57893e-05	7.24815e-07	6.91057e-05	2.35505e-07	2.24537e-05	1.45963e-07	1.26091e-05	4.86333e-08	4.20121e-06
3790	26	1.49666e-07	1.02331e-05	4.96849e-08	3.3971e-06	6.21172e-07	6.31774e-05	2.04105e-07	2.07588e-05	-0.00016601	-0.0180068	-5.57809e-05	-0.00605046	1.13073e-06	0.000121134	3.68508e-07	3.94778e-05	7.27867e-07	7.63501e-05	2.36497e-07	2.48075e-05	1.54194e-07	1.41288e-05	5.13756e-08	4.70754e-06
3800	26	1.56296e-07	1.17729e-05	5.18861e-08	3.90828e-06	6.26878e-07	6.94218e-05	2.0598e-07	2.28106e-05	-0.000165812	-0.0196659	-5.57145e-05	-0.00660794	1.13216e-06	0.000132442	3.68972e-07	4.31631e-05	7.34848e-07	8.36478e-05	2.38765e-07	2.71787e-05	1.40555e-07	1.56247e-05	4.68313e-08	5.20598e-06
3810	26	1.63403e-07	1.33744e-05	5.42454e-08	4.43993e-06	6.30799e-07	7.5711e-05	2.07268e-07	2.48771e-05	-0.000165616	-0.021323	-5.56486e-05	-0.00716473	1.13155e-06	0.000143763	3.68775e-07	4.68527e-05	7.52082e-07	9.11e-05	2.44365e-07	2.96e-05	1.51729e-07	1.70819e-05	5.05545e-08	5.69149e-06
3820	26	1.5931e-07	1.49933e-05	5.28865e-08	4.97736e-06	6.37637e-07	8.20483e-05	2.09515e-07	2.69594e-05	-0.000165427	-0.0229782	-5.5585e-05	-0.0077209	1.13655e-06	0.000155098	3.70405e-07	5.05468e-05	7.50849e-07	9.86146e-05	2.43964e-07	3.20417e-05	1.7177e-07	1.87012e-05	5.72318e-08	6.23103e-06
3830	26	1.55876e-07	1.65667e-05	5.17467e-08	5.49969e-06	6.47211e-07	8.8488e-05	2.12661e-07	2.90754e-05	-0.000165242	-0.0246316	-5.5523e-05	-0.00827646	1.14275e-06	0.000166502	3.72425e-07	5.42635e-05	7.43454e-07	0.000106131	2.41562e-07	3.44838e-05	1.70892e-07	2.0422e-05	5.69393e-08	6.80437e-06
3840	26	1.71574e-07	1.82056e-05	5.69578e-08	6.04376e-06	6.47136e-07	9.49518e-05	2.12636e-07	3.11992e-05	-0.000165046	-0.026283	-5.54571e-05	-0.00883135	1.15844e-06	0.000178006	3.77537e-07	5.80128e-05	7.53917e-07	0.000113612	2.44961e-07	3.69147e-05	1.67909e-07	2.21151e-05	5.59453e-08	7.36852e-06
3850	26	1.93198e-07	2.00406e-05	6.41362e-08	6.65292e-06	6.38967e-07	0.000101364	2.09952e-07	3.33062e-05	-0.000164848	-0.0279324	-5.53906e-05	-0.00938559	1.15564e-06	0.000189574	3.76625e-07	6.17828e-05	7.65434e-07	0.000121206	2.48703e-07	3.9382e-05	1.65626e-07	2.37916e-05	5.51848e-08	7.92709e-06
3860	26	1.82452e-07	2.19314e-05	6.05688e-08	7.28061e-06	6.42581e-07	0.000107786	2.11139e-07	3.54163e-05	-0.000164665	-0.02958	-5.5329e-05	-0.00993919	1.17325e-06	0.000201213	3.82364e-07	6.5576e-05	7.61616e-07	0.000128856	2.47463e-07	4.18676e-05	1.78763e-07	2.55018e-05	5.95619e-08	8.49691e-06
3870	26	1.80395e-07	2.3745e-05	5.9886e-08	7.88267e-06	6.29101e-07	0.000114144	2.0671e-07	3.75055e-05	-0.000164474	-0.0312257	-5.52649e-05	-0.0104922	1.18224e-06	0.000212981	3.85296e-07	6.94112e-05	7.50454e-07	0.000136415	2.43836e-07	4.43237e-05	1.9063e-07	2.73442e-05	6.35159e-08	9.11079e-06
3880	26	1.94906e-07	2.56237e-05	6.47035e-08	8.50637e-06	6.32733e-07	0.000120438	2.07903e-07	3.95735e-05	-0.000164281	-0.0328695	-5.52e-05	-0.0110445	1.17163e-06	0.00022476	3.81838e-07	7.32499e-05	7.66729e-07	0.000143971	2.49124e-07	4.67789e-05	2.01273e-07	2.9306e-05	6.70618e-08	9.76445e-06
3890	26	1.89936e-07	2.75489e-05	6.30534e-08	9.14546e-06	6.34175e-07	0.000126771	2.08377e-07	4.16544e-05	-0.000164088	-0.0345113	-5.51352e-05	-0.0115961	1.17705e-06	0.000236491	3.83605e-07	7.70731e-05	7.61638e-07	0.000151629	2.4747e-07	4.9267e-05	2.09585e-07	3.13723e-05	6.98315e-08	1.04529e-05
3900	26	1.93916e-07	2.94605e-05	6.43748e-08	9.78007e-06	6.41777e-07	0.000133147	2.10875e-07	4.37494e-05	-0.000163898	-0.0361512	-5.50713e-05	-0.0121472	1.17541e-06	0.000248267	3.83071e-07	8.09108e-05	7.6477e-07	0.000159248	2.48488e-07	5.17424e-05	1.9977e-07	3.34276e-05	6.6561e-08	1.11377e-05
3910	26	1.99954e-07	3.14146e-05	6.63791e-08	1.04288e-05	6.4943e-07	0.000139604	2.1339e-07	4.58712e-05	-0.000163705	-0.0377892	-5.50066e-05	-0.0126976	1.17035e-06	0.000260001	3.8142e-07	8.4735e-05	7.78517e-07	0.000166956	2.52954e-07	5.42471e-05	2.04584e-07	3.54614e-05	6.81652e-08	1.18153e-05
3920	26	2.06344e-07	3.34573e-05	6.85006e-08	1.11069e-05	6.57253e-07	0.000146135	2.1596e-07	4.80169e-05	-0.000163529	-0.0394254	-5.49475e-05	-0.0132473	1.16219e-06	0.000271665	3.78761e-07	8.85364e-05	7.98065e-07	0.000174845	2.59306e-07	5.68104e-05	2.24974e-07	3.76096e-05	7.49588e-08	1.25311e-05
3930	26	1.96092e-07	3.54692e-05	6.50973e-08	1.17748e-05	6.65116e-07	0.000152757	2.18544e-07	5.01928e-05	-0.000163334	-0.0410597	-5.4882e-05	-0.0137965	1.16287e-06	0.000283278	3.78984e-07	9.23212e-05	8.04453e-07	0.000182859	2.61381e-07	5.94142e-05	2.15697e-07	3.98099e-05	7.18677e-08	1.32642e-05
3940	26	1.89086e-07	3.73942e-05	6.27715e-08	1.24138e-05	6.6125e-07	0.00015939	2.17274e-07	5.23724e-05	-0.000163142	-0.0426921	-5.48173e-05	-0.014345	1.17549e-06	0.000294957	3.83095e-07	9.61272e-05	8.05667e-07	0.000190925	2.61776e-07	6.20349e-05	2.11532e-07	4.19615e-05	7.04801e-08	1.39811e-05
3950	26	1.86914e-07	3.92759e-05	6.20503e-08	1.30385e-05	6.62152e-07	0.000166007	2.1757e-07	5.45465e-05	-0.000162969	-0.0443226	-5.47591e-05	-0.0148929	1.17088e-06	0.000306688	3.81594e-07	9.99504e-05	8.05608e-07	0.000198986	2.61756e-07	6.46542e-05	2.05529e-07	4.40711e-05	6.84799e-08	1.4684e-05
3960	26	1.93417e-07	4.11796e-05	6.4209e-08	1.36705e-05	6.64258e-07	0.000172638	2.18262e-07	5.67255e-05	-0.000162807	-0.0459515	-5.47047e-05	-0.0154402	1.17377e-06	0.000318413	3.82534e-07	0.000103772	7.98235e-07	0.00020702	2.59361e-07	6.72644e-05	2.06889e-07	4.61296e-05	6.89333e-08	1.53699e-05
3970	26	1.98564e-07	4.31322e-05	6.59176e-08	1.43187e-05	6.61448e-07	0.00017926	2.17338e-07	5.89012e-05	-0.000162619	-0.0475787	-5.46416e-05	-0.0159869	1.17659e-06	0.000330174	3.83455e-07	0.000107604	7.95686e-07	0.000214972	2.58533e-07	6.98482e-05	2.1665e-07	4.82528e-05	7.21854e-08	1.60773e-05
3980	26	2.02907e-07	4.51466e-05	6.73596e-08	1.49874e-05	6.84893e-07	0.00018599	2.25042e-07	6.11127e-05	-0.000162414	-0.0492038	-5.45728e-05	-0.016533	1.17069e-06	0.000341905	3.81532e-07	0.000111428	8.00047e-07	0.000222958	2.5995e-07	7.2443e-05	2.12389e-07	5.03965e-05	7.07657e-08	1.67915e-05
3990	26	2.01491e-07	4.71683e-05	6.68893e-08	1.56586e-05	6.90876e-07	0.000192873	2.27008e-07	6.33742e-05	-0.000162223	-0.0508271	-5.45087e-05	-0.0170784	1.17514e-06	0.000353628	3.82981e-07	0.000115248	8.051e-07	0.000230967	2.61592e-07	7.50454e-05	2.08366e-07	5.25082e-05	6.94253e-08	1.74952e-05
4000	26	1.86336e-07	4.90965e-05	6.18585e-08	1.62987e-05	6.85379e-07	0.000199735	2.25202e-07	6.5629e-05	-0.000162038	-0.0524483	-5.44464e-05	-0.0176232	1.19606e-06	0.000365509	3.89799e-07	0.00011912	8.03609e-07	0.000239017	2.61107e-07	7.76609e-05	2.34364e-07	5.47215e-05	7.80876e-08	1.82326e-05
4010	26	1.84985e-07	5.09575e-05	6.141e-08	1.69165e-05	6.75433e-07	0.000206552	2.21934e-07	6.78687e-05	-0.000161854	-0.0540678	-5.43845e-05	-0.0181673	1.19409e-06	0.000377463	3.89159e-07	0.000123016	8.14813e-07	0.000247094	2.64748e-07	8.02852e-05	2.4268e-07	5.71292e-05	8.08583e-08	1.90348e-05
4020	26	1.82323e-07	5.27824e-05	6.05262e-08	1.75223e-05	6.60798e-07	0.000213222	2.17125e-07	7.00605e-05	-0.000161678	-0.0556855	-5.43255e-05	-0.0187109	1.18391e-06	0.000389349	3.8584e-07	0.00012689	8.11183e-07	0.000255257	2.63568e-07	8.29376e-05	2.3689e-07	5.9519e-05	7.89292e-08	1.98311e-05
4030	26	1.74742e-07	5.45863e-05	5.80095e-08	1.81212e-05	6.65522e-07	0.000219834	2.18677e-07	7.22331e-05	-0.0001615	-0.0573013	-5.42657e-05	-0.0192538	1.19244e-06	0.000401244	3.88621e-07	0.000130767	8.08835e-07	0.000263342	2.62805e-07	8.55646e-05	2.26085e-07	6.18181e-05	7.53292e-08	2.05971e-05
4040	26	1.72452e-07	5.63115e-05	5.72493e-08	1.86938e-05	6.7283e-07	0.000226539	2.21079e-07	7.4436e-05	-0.000161312	-0.0589154	-5.42026e-05	-0.0197962	1.17951e-06	0.000413102	3.84407e-07	0.000134631	8.08134e-07	0.00027144	2.62577e-07	8.81958e-05	2.29187e-07	6.41052e-05	7.63627e-08	2.13591e-05
4050	26	1.59414e-07	5.79749e-05	5.29211e-08	1.9246e-05	6.69514e-07	0.000233249	2.19989e-07	7.66408e-05	-0.000161133	-0.0605276	-5.41423e-05	-0.0203379	1.17797e-06	0.000424878	3.83903e-07	0.000138469	7.99342e-07	0.000279481	2.5972e-07	9.08083e-05	2.08171e-07	6.62826e-05	6.93604e-08	2.20846e-05
4060	26	1.56809e-07	5.95469e-05	5.20561e-08	1.97679e-05	6.62379e-07	0.000239908	2.17644e-07	7.88291e-05	-0.000160952	-0.062138	-5.40816e-05	-0.020879	1.18323e-06	0.000436686	3.85618e-07	0.000142317	7.90864e-07	0.000287438	2.56966e-07	9.33937e-05	2.02142e-07	6.83237e-05	6.73515e-08	2.27647e-05
4070	26	1.59888e-07	6.11208e-05	5.30784e-08	2.02904e-05	6.71918e-07	0.000246574	2.20779e-07	8.10193e-05	-0.000160774	-0.0637466	-5.40217e-05	-0.0214195	1.18861e-06	0.000448549	3.87372e-07	0.000146183	7.89602e-07	0.000295325	2.56556e-07	9.59563e-05	2.08724e-07	7.0396e-05	6.95446e-08	2.34552e-05
4080	26	1.60564e-07	6.27328e-05	5.33029e-08	2.08256e-05	6.76096e-07	0.00025332	2.22151e-07	8.32358e-05	-0.000160601	-0.0653535	-5.39636e-05	-0.0219594	1.17792e-06	0.000460383	3.83888e-07	0.00015004	7.99521e-07	0.00030327	2.59779e-07	9.8538e-05	1.93365e-07	7.24032e-05	6.44271e-08	2.41239e-05
4090	26	1.7995e-07	6.44017e-05	5.97385e-08	2.13796e-05	6.81125e-07	0.000260099	2.23804e-07	8.54633e-05	-0.000160427	-0.0669587	-5.3905e-05	-0.0224988	1.1887e-06	0.000472192	3.874e-07	0.000153889	8.01128e-07	0.000311272	2.60301e-07	0.000101138	2.00361e-07	7.43484e-05	6.67581e-08	2.47721e-05
4100	26	1.77336e-07	6.6234e-05	5.88706e-08	2.19878e-05	6.82434e-07	0.000266923	2.24234e-07	8.77056e-05	-0.000160234	-0.068562	-5.38403e-05	-0.0230375	1.20178e-06	0.000484159	3.91665e-07	0.000157789	8.05607e-07	0.000319304	2.61756e-07	0.000103747	2.20541e-07	7.64712e-05	7.34817e-08	2.54794e-05
4110	26	1.75882e-07	6.79426e-05	5.83878e-08	2.25551e-05	6.65866e-07	0.000273677	2.1879e-07	8.99247e-05	-0.000160044	-0.0701634	-5.37763e-05	-0.0235756	1.19738e-06	0.000496178	3.90228e-07	0.000161706	8.11894e-07	0.000327391	2.63799e-07	0.000106375	2.23832e-07	7.86857e-05	7.45784e-08	2.62172e-05
4120	26	1.76571e-07	6.97194e-05	5.86166e-08	2.31449e-05	6.54815e-07	0.000280242	2.15159e-07	9.20818e-05	-0.000159846	-0.0717629	-5.37099e-05	-0.0241131	1.18185e-06	0.000508022	3.85168e-07	0.000165566	8.30874e-07	0.0003356	2.69966e-07	0.000109042	2.35314e-07	8.10061e-05	7.84041e-08	2.69903e-05
4130	26	1.6993e-07	7.14456e-05	5.6412e-08	2.3718e-05	6.64722e-07	0.00028682	2.18414e-07	9.42432e-05	-0.000159644	-0.0733603	-5.36419e-05	-0.0246498	1.18976e-06	0.000519881	3.87746e-07	0.000169431	8.45958e-07	0.000343983	2.74867e-07	0.000111766	2.34638e-07	8.33438e-05	7.81787e-08	2.77692e-05
4140	26	1.60336e-07	7.30969e-05	5.32272e-08	2.42662e-05	6.76102e-07	0.000293524	2.22154e-07	9.64462e-05	-0.00015945	-0.0749557	-5.35767e-05	-0.0251859	1.19987e-06	0.00053182	3.91042e-07	0.000173322	8.61126e-07	0.000352535	2.79795e-07	0.000114545	2.30885e-07	8.56687e-05	7.69283e-08	2.85439e-05
4150	26	1.54751e-07	7.46683e-05	5.13729e-08	2.47878e-05	6.89952e-07	0.000300354	2.26704e-07	9.86903e-05	-0.000159273	-0.0765494	-5.35174e-05	-0.0257214	1.22203e-06	0.000543936	3.98264e-07	0.00017727	8.53687e-07	0.000361099	2.77378e-07	0.000117328	2.32728e-07	8.79917e-05	7.75424e-08	2.93179e-05
4160	26	1.69842e-07	7.63113e-05	5.63827e-08	2.53332e-05	6.89889e-07	0.000307263	2.26684e-07	0.00010096	-0.000159111	-0.0781413	-5.34628e-05	-0.0262563	1.22633e-06	0.000556162	3.99665e-07	0.000181255	8.46673e-07	0.000369614	2.75099e-07	0.000120094	2.18202e-07	9.02901e-05	7.27025e-08	3.00837e-05
4170	26	1.59331e-07	7.79322e-05	5.28935e-08	2.58713e-05	6.93144e-07	0.000314193	2.27753e-07	0.000103238	-0.000158947	-0.0797316	-5.3408e-05	-0.0267906	1.23616e-06	0.000568485	4.02867e-07	0.000185271	8.21244e-07	0.00037794	2.66837e-07	0.000122799	2.29437e-07	9.25188e-05	7.64459e-08	3.08262e-05
4180	26	1.61704e-07	7.95579e-05	5.36814e-08	2.6411e-05	6.87006e-07	0.000321087	2.25736e-07	0.000105503	-0.000158781	-0.0813202	-5.33519e-05	-0.0273244	1.22979e-06	0.000580824	4.00791e-07	0.000189292	8.016e-07	0.000386055	2.60454e-07	0.000125436	2.43596e-07	9.48842e-05	8.11635e-08	3.16144e-05
4190	26	1.54662e-07	8.11206e-05	5.13436e-08	2.69298e-05	6.88869e-07	0.000327971	2.26349e-07	0.000107765	-0.000158608	-0.0829071	-5.32938e-05	-0.0278576	1.24762e-06	0.000593194	4.06602e-07	0.000193324	8.10583e-07	0.000394089	2.63373e-07	0.000128047	2.58626e-07	9.74068e-05	8.61713e-08	3.24549e-05
4200	26	1.55999e-07	8.26817e-05	5.17875e-08	2.7448e-05	6.79029e-07	0.000334802	2.23115e-07	0.000110009	-0.000158425	-0.0844923	-5.32324e-05	-0.0283903	1.26633e-06	0.000605768	4.12702e-07	0.000197421	8.17121e-07	0.000402238	2.65497e-07	0.000130694	2.61333e-07	9.99978e-05	8.70733e-08	3.33182e-05
4210	26	1.50121e-07	8.4208e-05	4.9836e-08	2.79547e-05	6.83985e-07	0.000341629	2.24744e-07	0.000112252	-0.000158252	-0.0860757	-5.31744e-05	-0.0289223	1.27121e-06	0.000618468	4.1429e-07	0.00020156	8.11155e-07	0.00041038	2.63559e-07	0.00013334	2.71269e-07	0.000102674	9.03838e-08	3.42098e-05
4220	26	1.54261e-07	8.57232e-05	5.12104e-08	2.84577e-05	6.92895e-07	0.000348497	2.27672e-07	0.000114509	-0.000158083	-0.0876574	-5.31174e-05	-0.0294538	1.26956e-06	0.000631172	4.13754e-07	0.000205701	8.30807e-07	0.000418576	2.69944e-07	0.000136003	2.76034e-07	0.000105407	9.19715e-08	3.51205e-05
4230	26	1.55428e-07	8.72819e-05	5.15978e-08	2.89752e-05	7.0663e-07	0.000355514	2.32185e-07	0.000116815	-0.000157896	-0.0892372	-5.30547e-05	-0.0299846	1.26748e-06	0.000643872	4.13076e-07	0.00020984	8.42846e-07	0.000426952	2.73856e-07	0.000138725	2.6964e-07	0.000108148	8.9841e-08	3.60338e-05
4240	26	1.43307e-07	8.87722e-05	4.75738e-08	2.94699e-05	7.10027e-07	0.000362595	2.33301e-07	0.000119141	-0.000157719	-0.0908153	-5.29952e-05	-0.0305149	1.27217e-06	0.000656552	4.14605e-07	0.000213972	8.40409e-07	0.000435373	2.73064e-07	0.000141461	2.6456e-07	0.000110799	8.81484e-08	3.69171e-05
4250	26	1.52489e-07	9.02517e-05	5.06223e-08	2.99611e-05	7.0804e-07	0.000369695	2.32648e-07	0.000121474	-0.000157543	-0.0923916	-5.29362e-05	-0.0310445	1.2798e-06	0.000669335	4.1709e-07	0.000218138	8.38185e-07	0.000443765	2.72341e-07	0.000144187	2.8079e-07	0.000113521	9.35561e-08	3.7824e-05
4260	26	1.63228e-07	9.18281e-05	5.41872e-08	3.04844e-05	6.96338e-07	0.000376719	2.28803e-07	0.000123782	-0.00015737	-0.0939662	-5.28779e-05	-0.0315736	1.25944e-06	0.000682038	4.10455e-07	0.000222278	8.38295e-07	0.000452146	2.72377e-07	0.00014691	2.92727e-07	0.000116389	9.75334e-08	3.87795e-05
4270	26	1.72476e-07	9.3508e-05	5.72573e-08	3.10421e-05	6.98798e-07	0.000383692	2.29611e-07	0.000126073	-0.00015719	-0.095539	-5.28175e-05	-0.0321021	1.25285e-06	0.000694588	4.08309e-07	0.000226368	8.49572e-07	0.000460593	2.76041e-07	0.000149655	3.04754e-07	0.000119376	1.01541e-07	3.97747e-05
4280	26	1.80115e-07	9.52692e-05	5.9793e-08	3.16267e-05	7.05958e-07	0.000390712	2.31963e-07	0.00012838	-0.000157017	-0.09711	-5.27593e-05	-0.03263	1.2442e-06	0.000707087	4.05489e-07	0.000230442	8.47154e-07	0.000469084	2.75256e-07	0.000152414	3.1405e-07	0.000122476	1.04638e-07	4.08078e-05
4290	26	1.88536e-07	9.71277e-05	6.25889e-08	3.22437e-05	7.19126e-07	0.000397837	2.3629e-07	0.000130721	-0.000156848	-0.0986794	-5.27025e-05	-0.0331573	1.22826e-06	0.000719455	4.00294e-07	0.000234472	8.40017e-07	0.000477513	2.72937e-07	0.000155153	3.17299e-07	0.000125645	1.05721e-07	4.18634e-05
4300	26	1.92741e-07	9.90361e-05	6.39847e-08	3.28773e-05	7.32836e-07	0.000405101	2.40795e-07	0.000133108	-0.000156689	-0.100247	-5.26493e-05	-0.033684	1.22595e-06	0.000731708	3.9954e-07	0.000238466	8.38138e-07	0.000485904	2.72326e-07	0.000157879	3.10279e-07	0.000128769	1.03381e-07	4.29046e-05
4310	26	1.85277e-07	0.000100945	6.15067e-08	3.35109e-05	7.39585e-07	0.000412468	2.43013e-07	0.000135529	-0.000156518	-0.101813	-5.25915e-05	-0.0342103	1.24985e-06	0.000744065	4.07328e-07	0.000242493	8.38034e-07	0.000494282	2.72292e-07	0.000160601	3.20231e-07	0.00013191	1.06697e-07	4.3951e-05
4320	26	1.74549e-07	0.000102748	5.79456e-08	3.41094e-05	7.33149e-07	0.000419866	2.40898e-07	0.000137959	-0.000156348	-0.103377	-5.25344e-05	-0.0347359	1.25533e-06	0.000756579	4.09116e-07	0.000246571	8.33003e-07	0.000502662	2.70658e-07	0.000163324	3.13725e-07	0.00013508	1.0453e-07	4.50072e-05
4330	26	1.72105e-07	0.000104474	5.71341e-08	3.46823e-05	7.29908e-07	0.000427157	2.39833e-07	0.000140355	-0.000156172	-0.10494	-5.24754e-05	-0.0352609	1.26028e-06	0.000769172	4.10728e-07	0.000250675	8.29573e-07	0.000510966	2.69543e-07	0.000166022	3.13018e-07	0.000138211	1.04294e-07	4.60502e-05
4340	26	1.56752e-07	0.00010611	5.20374e-08	3.52255e-05	7.3089e-07	0.000434457	2.40156e-07	0.000142754	-0.000155996	-0.106501	-5.24162e-05	-0.0357854	1.26435e-06	0.000781808	4.12056e-07	0.000254793	8.37197e-07	0.000519296	2.7202e-07	0.000168729	3.07917e-07	0.000141311	1.02595e-07	4.70832e-05
4350	26	1.50078e-07	0.00010764	4.98217e-08	3.57335e-05	7.39633e-07	0.000441806	2.43029e-07	0.000145169	-0.000155806	-0.10806	-5.23524e-05	-0.0363092	1.26031e-06	0.000794426	4.1074e-07	0.000258906	8.503e-07	0.000527733	2.76278e-07	0.00017147	3.08518e-07	0.000144387	1.02795e-07	4.81082e-05
4360	26	1.49318e-07	0.000109133	4.95693e-08	3.62292e-05	7.3536e-07	0.000449207	2.41624e-07	0.0001476	-0.00015564	-0.109617	-5.22967e-05	-0.0368325	1.26334e-06	0.000807048	4.11727e-07	0.000263019	8.55098e-07	0.00053627	2.77837e-07	0.000174244	3.14175e-07	0.000147506	1.0468e-07	4.91475e-05
4370	26	1.51114e-07	0.000110632	5.01658e-08	3.67269e-05	7.30599e-07	0.000456524	2.4006e-07	0.000150005	-0.000155472	-0.111173	-5.22403e-05	-0.0373551	1.28973e-06	0.000819812	4.20326e-07	0.000267179	8.60184e-07	0.000544846	2.79489e-07	0.00017703	3.1695e-07	0.000150668	1.05604e-07	5.02008e-05
4380	26	1.53969e-07	0.000112167	5.11133e-08	3.72364e-05	7.25015e-07	0.000463788	2.38225e-07	0.000152391	-0.000155306	-0.112727	-5.21844e-05	-0.0378773	1.29613e-06	0.000832759	4.22411e-07	0.000271398	8.70482e-07	0.000553492	2.82835e-07	0.00017984	3.19342e-07	0.000153837	1.06401e-07	5.12567e-05
4390	26	1.49697e-07	0.00011366	4.96952e-08	3.77321e-05	7.25732e-07	0.000471065	2.38461e-07	0.000154783	-0.000155126	-0.114279	-5.2124e-05	-0.0383988	1.30175e-06	0.00084575	4.24245e-07	0.000275632	8.81292e-07	0.000562256	2.86348e-07	0.000182687	3.35473e-07	0.00015711	1.11776e-07	5.23472e-05
4400	26	1.46991e-07	0.000115143	4.87968e-08	3.82241e-05	7.3348e-07	0.000478338	2.41007e-07	0.000157172	-0.000154958	-0.115829	-5.20674e-05	-0.0389198	1.31035e-06	0.000858806	4.27045e-07	0.000279887	8.99506e-07	0.000571159	2.92266e-07	0.00018558	3.26755e-07	0.000160444	1.08871e-07	5.34582e-05
4410	26	1.50468e-07	0.000116628	4.99513e-08	3.87174e-05	7.46449e-07	0.000485744	2.45268e-07	0.000159606	-0.000154776	-0.117378	-5.20064e-05	-0.0394401	1.30922e-06	0.000871907	4.26679e-07	0.000284157	9.00856e-07	0.000580168	2.92704e-07	0.000188507	3.26959e-07	0.000163701	1.08939e-07	5.45433e-05
4420	26	1.69706e-07	0.000118198	5.63376e-08	3.92384e-05	7.53082e-07	0.000493248	2.47448e-07	0.000162071	-0.000154603	-0.118925	-5.19483e-05	-0.0399599	1.30582e-06	0.000884994	4.25569e-07	0.000288422	8.96812e-07	0.000589145	2.9139e-07	0.000191424	3.33002e-07	0.000166999	1.10953e-07	5.56422e-05
4430	26	1.69653e-07	0.000119932	5.63202e-08	3.98142e-05	7.4771e-07	0.000500739	2.45682e-07	0.000164533	-0.000154447	-0.12047	-5.18957e-05	-0.0404791	1.30729e-06	0.000898046	4.26049e-07	0.000292676	9.00456e-07	0.000598126	2.92574e-07	0.000194342	3.30798e-07	0.000170317	1.10218e-07	5.67477e-05
4440	26	1.67476e-07	0.000121617	5.55974e-08	4.03735e-05	7.55739e-07	0.000508245	2.48321e-07	0.000166999	-0.000154299	-0.122014	-5.18462e-05	-0.0409978	1.31402e-06	0.00091117	4.28243e-07	0.000296953	8.95465e-07	0.000607078	2.90953e-07	0.000197251	3.28758e-07	0.000173623	1.09538e-07	5.78494e-05
4450	26	1.75008e-07	0.000123321	5.80978e-08	4.0939e-05	7.67781e-07	0.000515863	2.52278e-07	0.000169502	-0.000154139	-0.123556	-5.17923e-05	-0.041516	1.3069e-06	0.000924272	4.25921e-07	0.000301223	9.01422e-07	0.000616065	2.92888e-07	0.00020017	3.29654e-07	0.000176913	1.09837e-07	5.89455e-05
4460	26	1.90527e-07	0.000125168	6.32495e-08	4.15522e-05	7.72959e-07	0.000523578	2.53979e-07	0.000172037	-0.000153976	-0.125096	-5.17376e-05	-0.0420337	1.33155e-06	0.000937474	4.33955e-07	0.000305525	9.14623e-07	0.000625141	2.97178e-07	0.000203119	3.11867e-07	0.000180123	1.03911e-07	6.00151e-05
4470	26	1.9022e-07	0.000127083	6.31477e-08	4.21881e-05	7.70555e-07	0.000531282	2.53189e-07	0.000174569	-0.000153798	-0.126635	-5.16777e-05	-0.0425507	1.34597e-06	0.000950867	4.38656e-07	0.00030989	9.06726e-07	0.000634243	2.94611e-07	0.000206077	3.12935e-07	0.000183245	1.04267e-07	6.10551e-05
4480	26	1.98572e-07	0.000129033	6.59205e-08	4.28355e-05	7.69866e-07	0.000538988	2.52962e-07	0.0001771	-0.000153627	-0.128172	-5.16201e-05	-0.0430672	1.36121e-06	0.000964401	4.43621e-07	0.000314301	9.1826e-07	0.00064335	2.98359e-07	0.000209036	3.18118e-07	0.000186399	1.05993e-07	6.2106e-05
4490	26	2.0117e-07	0.00013103	6.67827e-08	4.34984e-05	7.73753e-07	0.000546698	2.5424e-07	0.000179634	-0.000153479	-0.129708	-5.15706e-05	-0.0435832	1.3776e-06	0.000978095	4.48965e-07	0.000318764	9.37619e-07	0.00065264	3.04649e-07	0.000212054	3.22762e-07	0.00018961	1.07541e-07	6.3176e-05
4500	26	1.98368e-07	0.00013303	6.58528e-08	4.41624e-05	7.82305e-07	0.000554482	2.5705e-07	0.000182192	-0.000153317	-0.131242	-5.15162e-05	-0.0440986	1.3763e-06	0.000991883	4.48541e-07	0.000323257	9.45235e-07	0.000662058	3.07124e-07	0.000215114	3.29561e-07	0.000192858	1.09806e-07	6.42583e-05
4510	26	2.15058e-07	0.000135089	7.13934e-08	4.48458e-05	7.96104e-07	0.000562365	2.61584e-07	0.000184782	-0.000153146	-0.132774	-5.14585e-05	-0.0446135	1.36726e-06	0.0010056	4.45595e-07	0.000327728	9.44003e-07	0.000671517	3.06724e-07	0.000218188	3.46195e-07	0.000196255	1.15348e-07	6.53899e-05
4520	26	2.13843e-07	0.000137233	7.09899e-08	4.55574e-05	8.0046e-07	0.000570366	2.63015e-07	0.000187411	-0.000152974	-0.134305	-5.14007e-05	-0.0451278	1.37195e-06	0.00101928	4.47123e-07	0.000332185	9.42444e-07	0.000680968	3.06217e-07	0.000221259	3.49757e-07	0.000199727	1.16535e-07	6.65467e-05
4530	26	2.14186e-07	0.000139385	7.11037e-08	4.62718e-05	7.97661e-07	0.000578357	2.62095e-07	0.000190037	-0.000152816	-0.135834	-5.13478e-05	-0.0456415	1.3709e-06	0.001033	4.46781e-07	0.000336656	9.41134e-07	0.000690374	3.05791e-07	0.000224315	3.41534e-07	0.000203181	1.13795e-07	6.76975e-05
4540	26	2.26765e-07	0.000141579	7.52798e-08	4.70004e-05	7.98294e-07	0.000586336	2.62303e-07	0.000192658	-0.00015265	-0.137361	-5.12921e-05	-0.0461547	1.3797e-06	0.00104674	4.49647e-07	0.000341136	9.46265e-07	0.000699811	3.07458e-07	0.000227381	3.54362e-07	0.00020665	1.18069e-07	6.88536e-05
4550	26	2.3335e-07	0.0001439	7.74658e-08	4.77709e-05	7.93187e-07	0.000594282	2.60625e-07	0.000195269	-0.000152496	-0.138887	-5.12403e-05	-0.0466674	1.38706e-06	0.00106055	4.52046e-07	0.000345637	9.59983e-07	0.000709344	3.11916e-07	0.000230478	3.60171e-07	0.000210226	1.20005e-07	7.0045e-05
4560	26	2.20703e-07	0.000146173	7.32673e-08	4.85255e-05	8.03081e-07	0.000602263	2.63876e-07	0.000197891	-0.000152328	-0.140411	-5.11838e-05	-0.0471795	1.39726e-06	0.0010745	4.55371e-07	0.000350182	9.7013e-07	0.000719018	3.15213e-07	0.000233622	3.75253e-07	0.000213899	1.2503e-07	7.12687e-05
4570	26	2.15209e-07	0.00014835	7.14433e-08	4.92481e-05	8.21859e-07	0.00061039	2.70046e-07	0.000200562	-0.000152168	-0.141933	-5.11298e-05	-0.0476911	1.40021e-06	0.00108848	4.56333e-07	0.000354737	9.73396e-07	0.000728738	3.16274e-07	0.00023678	3.80521e-07	0.000217685	1.26786e-07	7.25302e-05
4580	26	2.14142e-07	0.00015049	7.10893e-08	4.99586e-05	8.27303e-07	0.00061864	2.71835e-07	0.000203273	-0.000152006	-0.143454	-5.10756e-05	-0.0482021	1.42353e-06	0.0011026	4.63934e-07	0.000359339	9.65195e-07	0.000738434	3.13609e-07	0.00023993	3.65887e-07	0.00022143	1.21909e-07	7.3778e-05
4590	26	2.27121e-07	0.000152702	7.53978e-08	5.06928e-05	8.33192e-07	0.000626947	2.7377e-07	0.000206002	-0.000151842	-0.144974	-5.10205e-05	-0.0487126	1.42991e-06	0.00111686	4.66011e-07	0.000363988	9.774e-07	0.000748143	3.17575e-07	0.000243085	3.63717e-07	0.000225075	1.21186e-07	7.49925e-05
4600	26	2.1823e-07	0.000154944	7.24462e-08	5.1437e-05	8.29254e-07	0.000635265	2.72476e-07	0.000208735	-0.000151671	-0.146491	-5.09631e-05	-0.0492225	1.44522e-06	0.00113124	4.71001e-07	0.000368673	9.89822e-07	0.000757972	3.21611e-07	0.000246279	3.62732e-07	0.00022872	1.20858e-07	7.6207e-05
4610	26	2.26703e-07	0.000157149	7.52592e-08	5.21691e-05	8.31178e-07	0.000643579	2.73108e-07	0.000211467	-0.00015151	-0.148007	-5.0909e-05	-0.0497319	1.45141e-06	0.00114571	4.73017e-07	0.000373391	9.94826e-07	0.0007679	3.23237e-07	0.000249505	3.66429e-07	0.000232368	1.2209e-07	7.74226e-05
4620	26	2.44399e-07	0.00015951	8.11336e-08	5.29527e-05	8.27913e-07	0.000651865	2.72035e-07	0.00021419	-0.000151346	-0.149521	-5.08539e-05	-0.0502407	1.45127e-06	0.00116024	4.72973e-07	0.000378125	9.93051e-07	0.000777843	3.2266e-07	0.000252735	3.63847e-07	0.000236016	1.2123e-07	7.86379e-05
4630	26	2.57734e-07	0.000162019	8.55606e-08	5.37859e-05	8.43914e-07	0.000660203	2.77293e-07	0.00021693	-0.000151182	-0.151034	-5.07987e-05	-0.050749	1.46085e-06	0.00117478	4.76095e-07	0.000382865	9.94586e-07	0.00078778	3.23159e-07	0.000255964	3.66967e-07	0.000239677	1.22269e-07	7.98577e-05
4640	26	2.57898e-07	0.000164586	8.56151e-08	5.46379e-05	8.48622e-07	0.000668673	2.7884e-07	0.000219712	-0.000151019	-0.152545	-5.07439e-05	-0.0512567	1.46462e-06	0.00118942	4.77324e-07	0.000387636	1.00521e-06	0.000797784	3.26609e-07	0.000259214	3.73556e-07	0.00024339	1.24465e-07	8.10948e-05
4650	26	2.84139e-07	0.000167296	9.43264e-08	5.55376e-05	8.50917e-07	0.000677158	2.79594e-07	0.0002225	-0.000150864	-0.154054	-5.06917e-05	-0.0517638	1.46038e-06	0.00120406	4.75941e-07	0.000392407	1.0141e-06	0.000807876	3.29498e-07	0.000262493	3.83744e-07	0.000247175	1.27859e-07	8.23559e-05
4660	26	3.0669e-07	0.000170257	1.01813e-07	5.65205e-05	8.60566e-07	0.000685725	2.82765e-07	0.000225315	-0.000150702	-0.155562	-5.06375e-05	-0.0522705	1.45472e-06	0.00121863	4.74097e-07	0.000397154	1.02639e-06	0.000818087	3.33493e-07	0.000265811	3.95393e-07	0.000251077	1.31741e-07	8.36562e-05
4670	26	3.01234e-07	0.000173329	1.00001e-07	5.75403e-05	8.55124e-07	0.000694304	2.80976e-07	0.000228134	-0.000150544	-0.157068	-5.05843e-05	-0.0527766	1.47681e-06	0.00123326	4.81295e-07	0.000401923	1.03472e-06	0.000828383	3.362e-07	0.000269156	3.92749e-07	0.000255023	1.3086e-07	8.4971e-05
4680	26	2.89501e-07	0.000176257	9.61063e-08	5.85123e-05	8.55442e-07	0.000702872	2.81081e-07	0.00023095	-0.00015039	-0.158573	-5.05326e-05	-0.0532822	1.48007e-06	0.00124805	4.8236e-07	0.000406741	1.0323e-06	0.000838699	3.35413e-07	0.000272508	3.89335e-07	0.000258927	1.29722e-07	8.62716e-05
4690	26	2.9515e-07	0.000179171	9.79817e-08	5.94799e-05	8.58305e-07	0.000711436	2.82022e-07	0.000233764	-0.000150232	-0.160076	-5.04793e-05	-0.0537872	1.49474e-06	0.0012629	4.87141e-07	0.000411583	1.04222e-06	0.000849066	3.38636e-07	0.000275877	3.75582e-07	0.000262765	1.2514e-07	8.75505e-05
4700	26	2.94509e-07	0.000182101	9.77689e-08	6.04524e-05	8.7199e-07	0.000720072	2.86518e-07	0.000236601	-0.000150076	-0.161578	-5.04271e-05	-0.0542918	1.51487e-06	0.00127795	4.93701e-07	0.000416486	1.05069e-06	0.000859536	3.41389e-07	0.000279279	3.8047e-07	0.000266552	1.26768e-07	8.88123e-05
4710	26	2.99282e-07	0.000185081	9.93534e-08	6.14419e-05	8.66066e-07	0.000728757	2.84572e-07	0.000239455	-0.000149914	-0.163078	-5.03726e-05	-0.0547958	1.5229e-06	0.00129315	4.96316e-07	0.00042144	1.0533e-06	0.000870045	3.42235e-07	0.000282693	3.79873e-07	0.00027036	1.2657e-07	9.00808e-05
4720	26	2.94032e-07	0.000188049	9.76105e-08	6.24272e-05	8.74697e-07	0.000737463	2.87408e-07	0.000242316	-0.000149769	-0.164576	-5.03238e-05	-0.0552992	1.52276e-06	0.00130838	4.96271e-07	0.000426405	1.05502e-06	0.0008806	3.42794e-07	0.000286123	3.91385e-07	0.000274203	1.30405e-07	9.13613e-05
4730	26	2.87282e-07	0.000190959	9.53697e-08	6.3393e-05	8.77192e-07	0.000746206	2.88228e-07	0.000245188	-0.000149617	-0.166073	-5.02728e-05	-0.0558022	1.51973e-06	0.00132359	4.95283e-07	0.00043136	1.04357e-06	0.000891093	3.39074e-07	0.000289532	3.9816e-07	0.000278155	1.32662e-07	9.26781e-05
4740	26	2.98398e-07	0.000193863	9.906e-08	6.43572e-05	8.96772e-07	0.000755071	2.94661e-07	0.000248101	-0.000149466	-0.167568	-5.0222e-05	-0.0563047	1.5322e-06	0.00133883	4.99347e-07	0.00043633	1.04122e-06	0.000901504	3.38313e-07	0.000292915	3.99177e-07	0.000282151	1.33001e-07	9.40094e-05
4750	26	3.10577e-07	0.000196924	1.03103e-07	6.53734e-05	9.04434e-07	0.000764082	2.97179e-07	0.000251062	-0.000149306	-0.169062	-5.01682e-05	-0.0568067	1.52971e-06	0.00135416	4.98536e-07	0.000441324	1.04337e-06	0.00091192	3.39009e-07	0.000296299	4.07182e-07	0.000286184	1.35668e-07	9.53532e-05
4760	26	3.08269e-07	0.000200006	1.02337e-07	6.63964e-05	9.18946e-07	0.000773195	3.01947e-07	0.000254056	-0.000149149	-0.170555	-5.01158e-05	-0.0573081	1.52489e-06	0.00136943	4.96966e-07	0.000446302	1.0476e-06	0.000922383	3.40385e-07	0.000299699	4.17841e-07	0.000290286	1.3922e-07	9.67201e-05
4770	26	3.13431e-07	0.000203114	1.0405e-07	6.74283e-05	9.14143e-07	0.000782367	3.00369e-07	0.00025707	-0.000148982	-0.172045	-5.00596e-05	-0.057809	1.52367e-06	0.00138468	4.96567e-07	0.000451271	1.05328e-06	0.000932871	3.4223e-07	0.000303107	4.37035e-07	0.000294558	1.45615e-07	9.81434e-05
4780	26	3.14627e-07	0.000206252	1.04448e-07	6.847e-05	9.16416e-07	0.000791554	3.01116e-07	0.000260089	-0.000148832	-0.173534	-5.0009e-05	-0.0583093	1.53837e-06	0.00140001	5.01359e-07	0.000456268	1.05844e-06	0.000943431	3.43906e-07	0.000306538	4.33868e-07	0.000298921	1.4456e-07	9.95973e-05
4790	26	3.2697e-07	0.000209451	1.08545e-07	6.9532e-05	9.06922e-07	0.000800657	2.97996e-07	0.00026308	-0.000148682	-0.175022	-4.99588e-05	-0.0588091	1.54612e-06	0.00141543	5.03885e-07	0.000461291	1.06056e-06	0.000954027	3.44596e-07	0.000309981	4.1144e-07	0.000303177	1.37087e-07	0.000101015
4800	26	3.4149e-07	0.000212804	1.13365e-07	7.06449e-05	9.19313e-07	0.00080979	3.02068e-07	0.000266081	-0.000148504	-0.176508	-4.9899e-05	-0.0593084	1.54903e-06	0.0014309	5.04834e-07	0.000466335	1.05451e-06	0.00096461	3.4263e-07	0.000313419	4.18585e-07	0.000307308	1.39468e-07	0.000102392
4810	26	3.53279e-07	0.000216273	1.17279e-07	7.17966e-05	9.24582e-07	0.000819014	3.03799e-07	0.000269111	-0.000148357	-0.177992	-4.98494e-05	-0.0598072	1.54784e-06	0.00144639	5.04444e-07	0.000471384	1.04387e-06	0.000975103	3.39171e-07	0.000316828	4.26087e-07	0.000311535	1.41968e-07	0.0001038
4820	26	3.57922e-07	0.000219843	1.1882e-07	7.29819e-05	9.35997e-07	0.000828301	3.0755e-07	0.000272163	-0.000148208	-0.179475	-4.97994e-05	-0.0603054	1.54063e-06	0.00146182	5.02094e-07	0.000476411	1.04914e-06	0.000985543	3.40884e-07	0.000320221	4.30783e-07	0.000315837	1.43532e-07	0.000105233
4830	26	3.57737e-07	0.000223392	1.18759e-07	7.41601e-05	9.38488e-07	0.000837682	3.08368e-07	0.000275245	-0.000148058	-0.180956	-4.97489e-05	-0.0608031	1.53604e-06	0.00147719	5.00601e-07	0.000481421	1.05622e-06	0.000996076	3.43185e-07	0.000323643	4.36178e-07	0.000320164	1.4533e-07	0.000106675
4840	26	3.5384e-07	0.000226969	1.17465e-07	7.53473e-05	9.31194e-07	0.000847037	3.05972e-07	0.000278319	-0.000147906	-0.182436	-4.96981e-05	-0.0613004	1.52168e-06	0.0014925	4.9592e-07	0.000486409	1.06339e-06	0.00100667	3.45516e-07	0.000327085	4.39503e-07	0.000324547	1.46438e-07	0.000108136
4850	26	3.41891e-07	0.000230441	1.13498e-07	7.64999e-05	9.06743e-07	0.000856221	2.97938e-07	0.000281337	-0.000147762	-0.183914	-4.96494e-05	-0.0617971	1.51209e-06	0.00150762	4.92796e-07	0.000491339	1.05909e-06	0.00101727	3.44118e-07	0.000330529	4.45635e-07	0.000328957	1.48481e-07	0.000109605
4860	26	3.43743e-07	0.000233849	1.14113e-07	7.76314e-05	9.16126e-07	0.000865338	3.01021e-07	0.000284333	-0.000147603	-0.185391	-4.9596e-05	-0.0622933	1.51891e-06	0.00152279	4.95017e-07	0.000496281	1.05519e-06	0.00102784	3.42851e-07	0.000333963	4.32368e-07	0.000333362	1.4406e-07	0.000111073
4870	26	3.40778e-07	0.000237282	1.13129e-07	7.87711e-05	9.20018e-07	0.000874531	3.02299e-07	0.000287353	-0.000147443	-0.186866	-4.95425e-05	-0.062789	1.53385e-06	0.00153805	4.99886e-07	0.000501253	1.05796e-06	0.00103838	3.43752e-07	0.00033739	4.40468e-07	0.000337713	1.46759e-07	0.000112522
4880	26	3.20547e-07	0.00024057	1.06413e-07	7.98627e-05	9.17077e-07	0.000883707	3.01333e-07	0.000290368	-0.0001473	-0.18834	-4.94942e-05	-0.0632842	1.53016e-06	0.00155338	4.98683e-07	0.000506251	1.06906e-06	0.00104902	3.47356e-07	0.000340845	4.47337e-07	0.000342175	1.49048e-07	0.000114009
4890	26	3.17949e-07	0.000243781	1.0555e-07	8.09287e-05	9.19838e-07	0.000892898	3.0224e-07	0.000293388	-0.000147162	-0.189812	-4.9448e-05	-0.0637789	1.50775e-06	0.00156857	4.91379e-07	0.000511202	1.07587e-06	0.00105974	3.49569e-07	0.00034433	4.35882e-07	0.000346587	1.45231e-07	0.000115479
4900	26	3.24701e-07	0.000246983	1.07792e-07	8.19915e-05	9.06335e-07	0.00090203	2.97803e-07	0.000296389	-0.000146993	-0.191283	-4.93912e-05	-0.0642731	1.52303e-06	0.0015837	4.96361e-07	0.000516131	1.07909e-06	0.00107054	3.50614e-07	0.000347838	4.31782e-07	0.000350914	1.43865e-07	0.000116921
4910	26	3.18578e-07	0.000250203	1.05759e-07	8.30604e-05	9.12886e-07	0.000911131	2.99956e-07	0.000299379	-0.000146832	-0.192752	-4.93371e-05	-0.0647667	1.52591e-06	0.00159895	4.97299e-07	0.000521102	1.08424e-06	0.00108136	3.52289e-07	0.000351355	4.31044e-07	0.000355228	1.43619e-07	0.000118358
4920	26	3.08245e-07	0.000253338	1.02329e-07	8.41012e-05	9.16885e-07	0.000920274	3.0127e-07	0.000302384	-0.000146673	-0.19422	-4.92837e-05	-0.0652599	1.52825e-06	0.00161421	4.98062e-07	0.000526075	1.08538e-06	0.00109221	3.52658e-07	0.000354878	4.27775e-07	0.000359527	1.4253e-07	0.00011979
4930	26	3.11506e-07	0.000256416	1.03411e-07	8.51231e-05	9.17366e-07	0.000929454	3.01428e-07	0.0003054	-0.000146533	-0.195686	-4.92367e-05	-0.0657525	1.52275e-06	0.00162948	4.96267e-07	0.00053105	1.08832e-06	0.00110308	3.53616e-07	0.00035841	4.26909e-07	0.000363789	1.42241e-07	0.00012121
4940	26	3.12917e-07	0.000259551	1.0388e-07	8.61638e-05	9.03955e-07	0.000938558	2.97021e-07	0.000308391	-0.000146388	-0.19715	-4.91878e-05	-0.0662446	1.52668e-06	0.00164471	4.97551e-07	0.000536015	1.09148e-06	0.00111397	3.54642e-07	0.000361947	4.36094e-07	0.000368112	1.45302e-07	0.000122651
4950	26	3.05542e-07	0.00026264	1.01432e-07	8.71891e-05	9.07179e-07	0.000947599	2.98081e-07	0.000311362	-0.000146233	-0.198614	-4.91359e-05	-0.0667362	1.52964e-06	0.00166	4.98515e-07	0.000541	1.08754e-06	0.00112487	3.5336e-07	0.000365489	4.40213e-07	0.000372491	1.46674e-07	0.00012411
4960	26	3.06453e-07	0.000265705	1.01734e-07	8.82067e-05	9.2181e-07	0.000956752	3.02888e-07	0.000314369	-0.000146081	-0.200075	-4.90848e-05	-0.0672273	1.5199e-06	0.00167523	4.9534e-07	0.000545962	1.09741e-06	0.00113579	3.56568e-07	0.000369037	4.40516e-07	0.000376905	1.46775e-07	0.00012558
4970	26	3.0015e-07	0.000268767	9.96415e-08	8.92233e-05	9.3216e-07	0.000966016	3.06289e-07	0.000317414	-0.000145923	-0.201535	-4.90316e-05	-0.0677179	1.5266e-06	0.00169046	4.97523e-07	0.000550925	1.11161e-06	0.00114684	3.61182e-07	0.000372628	4.28832e-07	0.000381258	1.42882e-07	0.000127031
4980	26	2.96898e-07	0.000271757	9.8562e-08	9.02159e-05	9.33549e-07	0.000975342	3.06745e-07	0.000320478	-0.000145776	-0.202994	-4.89822e-05	-0.068208	1.54825e-06	0.00170584	5.04579e-07	0.000555939	1.10191e-06	0.00115789	3.58031e-07	0.000376219	4.18542e-07	0.000385498	1.39454e-07	0.000128444
4990	26	3.04432e-07	0.000274759	1.01063e-07	9.12124e-05	9.29238e-07	0.000984659	3.05329e-07	0.000323539	-0.000145613	-0.204451	-4.89276e-05	-0.0686975	1.56881e-06	0.00172145	5.11279e-07	0.000561024	1.09289e-06	0.00116887	3.55101e-07	0.000379785	4.24955e-07	0.000389708	1.4159e-07	0.000129846
5000	26	3.09497e-07	0.00027783	1.02744e-07	9.22318e-05	9.29069e-07	0.00099395	3.05273e-07	0.000326592	-0.000145462	-0.205906	-4.88768e-05	-0.0691865	1.57556e-06	0.00173716	5.13481e-07	0.000566146	1.09271e-06	0.00117978	3.55042e-07	0.000383332	4.35162e-07	0.000394002	1.44991e-07	0.000131277
5010	26	2.96831e-07	0.000280858	9.85397e-08	9.32371e-05	9.20004e-07	0.00100317	3.02295e-07	0.000329623	-0.00014532	-0.20736	-4.88292e-05	-0.0696751	1.56072e-06	0.00175286	5.08642e-07	0.000571263	1.09736e-06	0.00119077	3.56551e-07	0.000386904	4.25948e-07	0.000398304	1.41921e-07	0.00013271
5020	26	2.91069e-07	0.00028379	9.6627e-08	9.42105e-05	9.20905e-07	0.00101238	3.02591e-07	0.000332649	-0.000145171	-0.208812	-4.87791e-05	-0.0701631	1.55617e-06	0.00176844	5.07159e-07	0.00057634	1.09948e-06	0.00120175	3.57241e-07	0.00039047	4.16764e-07	0.000402515	1.38861e-07	0.000134114
5030	26	2.92356e-07	0.000286703	9.7054e-08	9.51776e-05	9.29786e-07	0.00102163	3.05509e-07	0.000335688	-0.000145034	-0.210263	-4.87329e-05	-0.0706507	1.57551e-06	0.00178409	5.13463e-07	0.000581441	1.10441e-06	0.0012128	3.58842e-07	0.000394059	4.16328e-07	0.000406676	1.38716e-07	0.0001355
5040	26	2.93236e-07	0.00028964	9.73461e-08	9.61525e-05	9.39337e-07	0.00103098	3.08647e-07	0.000338758	-0.00014488	-0.211713	-4.86811e-05	-0.0711377	1.58555e-06	0.00179991	5.16734e-07	0.000586594	1.10201e-06	0.00122381	3.58064e-07	0.000397638	4.20336e-07	0.00041086	1.40051e-07	0.000136894
5050	26	2.81451e-07	0.000292532	9.34339e-08	9.71125e-05	9.41606e-07	0.00104039	3.09393e-07	0.000341851	-0.000144724	-0.213161	-4.86288e-05	-0.0716243	1.5826e-06	0.00181577	5.15774e-07	0.000591764	1.10068e-06	0.00123483	3.57631e-07	0.000401219	4.20751e-07	0.000415062	1.4019e-07	0.000138294
5060	26	2.77185e-07	0.000295301	9.20176e-08	9.80317e-05	9.29117e-07	0.00104976	3.05289e-07	0.00034493	-0.000144584	-0.214608	-4.85817e-05	-0.0721103	1.57658e-06	0.00183157	5.13813e-07	0.000596913	1.10049e-06	0.00124584	3.57569e-07	0.000404795	4.21289e-07	0.000419274	1.40369e-07	0.000139697
5070	26	2.87316e-07	0.000298123	9.53808e-08	9.89685e-05	9.26427e-07	0.00105903	3.04405e-07	0.000347975	-0.000144423	-0.216053	-4.85277e-05	-0.0725959	1.56707e-06	0.0018473	5.10711e-07	0.000602039	1.09364e-06	0.00125681	3.55342e-07	0.000408359	4.1657e-07	0.000423481	1.38797e-07	0.000141099
5080	26	2.81568e-07	0.000300989	9.34729e-08	9.99199e-05	9.22165e-07	0.00106828	3.03005e-07	0.000351015	-0.000144284	-0.217496	-4.84808e-05	-0.0730809	1.55525e-06	0.0018629	5.06859e-07	0.000607124	1.10454e-06	0.0012678	3.58885e-07	0.000411932	4.19673e-07	0.000427666	1.3983e-07	0.000142494
5090	26	2.73237e-07	0.000303745	9.0707e-08	0.000100835	9.20263e-07	0.00107748	3.0238e-07	0.000354038	-0.000144142	-0.218938	-4.84333e-05	-0.0735655	1.56364e-06	0.00187849	5.09594e-07	0.000612206	1.10145e-06	0.00127884	3.5788e-07	0.000415517	4.05111e-07	0.000431813	1.34978e-07	0.000143875
5100	26	2.66825e-07	0.000306425	8.85784e-08	0.000101725	9.27906e-07	0.00108671	3.04891e-07	0.000357071	-0.000144	-0.220379	-4.83854e-05	-0.0740496	1.56549e-06	0.00189415	5.10198e-07	0.000617308	1.09274e-06	0.00128982	3.55052e-07	0.000419085	3.89629e-07	0.00043577	1.2982e-07	0.000145194
5110	26	2.8178e-07	0.000309176	9.35433e-08	0.000102638	9.35994e-07	0.00109603	3.07549e-07	0.000360133	-0.000143841	-0.221818	-4.83321e-05	-0.0745332	1.56777e-06	0.00190982	5.10941e-07	0.000622415	1.09774e-06	0.00130075	3.56677e-07	0.000422636	3.89242e-07	0.000439664	1.29691e-07	0.000146491
5120	26	2.84899e-07	0.000312008	9.45785e-08	0.000103578	9.4035e-07	0.00110542	3.0898e-07	0.000363219	-0.000143687	-0.223256	-4.82802e-05	-0.0750162	1.56666e-06	0.00192547	5.10577e-07	0.000627516	1.11982e-06	0.00131185	3.63849e-07	0.000426244	3.9986e-07	0.000443601	1.33229e-07	0.000147803
5130	26	2.82937e-07	0.000314856	9.39272e-08	0.000104523	9.42766e-07	0.00111485	3.09774e-07	0.000366318	-0.000143545	-0.224692	-4.82325e-05	-0.0754988	1.57622e-06	0.00194119	5.13695e-07	0.00063264	1.10897e-06	0.001323	3.60326e-07	0.000429867	3.89503e-07	0.000447569	1.29778e-07	0.000149125
5140	26	2.72492e-07	0.000317656	9.04599e-08	0.000105453	9.36027e-07	0.00112425	3.0756e-07	0.000369405	-0.000143396	-0.226127	-4.81825e-05	-0.0759809	1.58699e-06	0.00195703	5.17206e-07	0.000637803	1.10643e-06	0.00133409	3.595e-07	0.00043347	3.88894e-07	0.000451449	1.29575e-07	0.000150418
5150	26	2.6172e-07	0.000320314	8.68837e-08	0.000106335	9.40112e-07	0.00113363	3.08902e-07	0.000372487	-0.000143241	-0.22756	-4.81305e-05	-0.0764624	1.58162e-06	0.00197288	5.15455e-07	0.000642966	1.10306e-06	0.00134512	3.58403e-07	0.000437054	3.83873e-07	0.000455315	1.27902e-07	0.000151706
5160	26	2.74935e-07	0.000323003	9.12709e-08	0.000107228	9.4035e-07	0.00114305	3.0898e-07	0.000375582	-0.000143099	-0.228992	-4.80828e-05	-0.0769435	1.58215e-06	0.00198868	5.15626e-07	0.000648117	1.10756e-06	0.00135616	3.59865e-07	0.00044064	3.84839e-07	0.000459143	1.28224e-07	0.000152981
5170	26	2.80987e-07	0.000325781	9.32798e-08	0.00010815	9.29425e-07	0.00115239	3.0539e-07	0.000378652	-0.00014297	-0.230422	-4.80393e-05	-0.0774241	1.58905e-06	0.00200454	5.17877e-07	0.000653285	1.11484e-06	0.00136728	3.62233e-07	0.000444255	3.89233e-07	0.00046302	1.29688e-07	0.000154273
5180	26	2.99067e-07	0.000328675	9.92818e-08	0.000109111	9.31042e-07	0.00116168	3.05922e-07	0.000381704	-0.000142832	-0.231851	-4.7993e-05	-0.0779043	1.59726e-06	0.00202047	5.20553e-07	0.000658477	1.11453e-06	0.00137842	3.6213e-07	0.000447875	4.08447e-07	0.000466993	1.3609e-07	0.000155597
5190	26	3.01819e-07	0.000331675	1.00195e-07	0.000110107	9.54471e-07	0.0011711	3.1362e-07	0.000384801	-0.000142695	-0.233279	-4.79469e-05	-0.078384	1.59873e-06	0.00203645	5.2103e-07	0.000663685	1.11472e-06	0.00138957	3.62191e-07	0.000451497	4.18416e-07	0.000471143	1.39412e-07	0.00015698
5200	26	3.11851e-07	0.000334753	1.03526e-07	0.000111129	9.48916e-07	0.00118065	3.11795e-07	0.000387937	-0.000142564	-0.234705	-4.79028e-05	-0.0788632	1.60501e-06	0.00205246	5.23076e-07	0.000668904	1.11095e-06	0.00140071	3.60968e-07	0.000455114	4.12413e-07	0.000475295	1.37412e-07	0.000158363
5210	26	3.01741e-07	0.000337819	1.0017e-07	0.000112147	9.41008e-07	0.00119009	3.09196e-07	0.000391039	-0.000142414	-0.23613	-4.78527e-05	-0.079342	1.61127e-06	0.00206855	5.25117e-07	0.000674147	1.08487e-06	0.0014117	3.52495e-07	0.000458686	4.07542e-07	0.000479397	1.35789e-07	0.00015973
5220	26	3.0651e-07	0.000340856	1.01753e-07	0.000113155	9.38071e-07	0.00119948	3.08231e-07	0.000394124	-0.00014228	-0.237553	-4.78076e-05	-0.0798203	1.60493e-06	0.00208464	5.2305e-07	0.00067939	1.05952e-06	0.00142239	3.44258e-07	0.00046216	3.94882e-07	0.000483419	1.3157e-07	0.00016107
5230	26	2.98711e-07	0.000343881	9.91638e-08	0.000114159	9.34278e-07	0.00120885	3.06985e-07	0.000397203	-0.000142146	-0.238975	-4.77624e-05	-0.0802982	1.59198e-06	0.00210063	5.18832e-07	0.000684603	1.06042e-06	0.00143299	3.44551e-07	0.000465603	3.81807e-07	0.000487296	1.27214e-07	0.000162362
5240	26	3.01367e-07	0.000346897	1.00046e-07	0.00011516	9.26572e-07	0.00121814	3.04453e-07	0.000400257	-0.00014201	-0.240396	-4.77169e-05	-0.0807755	1.59326e-06	0.00211658	5.19248e-07	0.000689799	1.06359e-06	0.00144362	3.4558e-07	0.000469057	3.66983e-07	0.00049105	1.22275e-07	0.000163612
5250	26	3.00384e-07	0.000349901	9.9719e-08	0.000116157	9.31207e-07	0.00122743	3.05976e-07	0.000403309	-0.000141871	-0.241815	-4.767e-05	-0.0812525	1.57037e-06	0.0021324	5.11788e-07	0.000694955	1.06608e-06	0.00145426	3.46389e-07	0.000472516	3.58414e-07	0.000494669	1.19419e-07	0.000164818
5260	26	3.08654e-07	0.000352954	1.02464e-07	0.000117171	9.3353e-07	0.00123675	3.06739e-07	0.000406372	-0.000141724	-0.243233	-4.76208e-05	-0.0817289	1.55808e-06	0.00214807	5.07784e-07	0.000700062	1.06934e-06	0.00146494	3.47447e-07	0.000475986	3.6225e-07	0.000498275	1.20698e-07	0.00016602
5270	26	3.1896e-07	0.000356095	1.05886e-07	0.000118214	9.25829e-07	0.00124606	3.04209e-07	0.000409429	-0.000141588	-0.24465	-4.75749e-05	-0.0822049	1.5466e-06	0.00216357	5.04041e-07	0.000705114	1.07112e-06	0.00147564	3.48025e-07	0.000479463	3.65196e-07	0.00050191	1.21679e-07	0.000167231
5280	26	3.15496e-07	0.000359273	1.04736e-07	0.000119269	9.26187e-07	0.0012553	3.04327e-07	0.000412467	-0.000141445	-0.246065	-4.7527e-05	-0.0826804	1.55812e-06	0.00217911	5.07795e-07	0.000710176	1.0724e-06	0.00148637	3.48443e-07	0.000482947	3.62739e-07	0.000505557	1.20861e-07	0.000168446
5290	26	3.1742e-07	0.000362434	1.05375e-07	0.000120318	9.22518e-07	0.00126456	3.03121e-07	0.00041551	-0.000141305	-0.247479	-4.74798e-05	-0.0831554	1.56035e-06	0.0021947	5.08524e-07	0.000715257	1.07609e-06	0.00149711	3.49642e-07	0.000486437	3.69998e-07	0.000509225	1.23279e-07	0.000169668
5300	26	3.13693e-07	0.000365598	1.04137e-07	0.000121369	9.15696e-07	0.00127373	3.00879e-07	0.000418524	-0.000141172	-0.248891	-4.74353e-05	-0.08363	1.55481e-06	0.00221028	5.06717e-07	0.000720336	1.06936e-06	0.00150784	3.47454e-07	0.000489925	3.74692e-07	0.000512944	1.24843e-07	0.000170907
5310	26	3.05682e-07	0.000368683	1.01478e-07	0.000122393	9.19978e-07	0.00128291	3.02286e-07	0.000421539	-0.000141045	-0.250302	-4.73927e-05	-0.0841042	1.54571e-06	0.00222578	5.03751e-07	0.000725387	1.06318e-06	0.0015185	3.45446e-07	0.000493386	3.86587e-07	0.000516731	1.28807e-07	0.000172169
5320	26	3.09116e-07	0.000371773	1.02618e-07	0.000123418	9.22895e-07	0.00129213	3.03245e-07	0.000424568	-0.000140897	-0.251712	-4.73429e-05	-0.0845778	1.56555e-06	0.00224136	5.10217e-07	0.000730464	1.06591e-06	0.00152913	3.46333e-07	0.000496842	3.77925e-07	0.000520551	1.2592e-07	0.000173442
5330	26	3.17489e-07	0.000374896	1.05397e-07	0.000124455	9.28135e-07	0.00130139	3.04967e-07	0.000427609	-0.000140762	-0.25312	-4.72975e-05	-0.085051	1.5567e-06	0.00225698	5.07334e-07	0.000735556	1.0575e-06	0.00153975	3.43602e-07	0.000500292	3.73067e-07	0.000524294	1.24302e-07	0.000174689
5340	26	3.27634e-07	0.000378139	1.08765e-07	0.000125532	9.43539e-07	0.00131073	3.10028e-07	0.000430679	-0.000140628	-0.254527	-4.72524e-05	-0.0855238	1.53583e-06	0.00227244	5.00531e-07	0.000740594	1.05878e-06	0.00155031	3.44018e-07	0.000503725	3.87999e-07	0.000528094	1.29277e-07	0.000175955
5350	26	3.23118e-07	0.000381377	1.07266e-07	0.000126607	9.5424e-07	0.00132022	3.13544e-07	0.000433797	-0.000140493	-0.255933	-4.72071e-05	-0.0859961	1.54275e-06	0.00228782	5.02786e-07	0.000745608	1.0579e-06	0.0015609	3.43732e-07	0.000507166	3.81692e-07	0.000531958	1.27176e-07	0.000177243
5360	26	3.28153e-07	0.000384656	1.08938e-07	0.000127695	9.38963e-07	0.0013297	3.08524e-07	0.000436911	-0.000140362	-0.257337	-4.71631e-05	-0.0864679	1.54281e-06	0.00230325	5.02807e-07	0.000750636	1.05786e-06	0.0015715	3.43718e-07	0.000510608	3.8082e-07	0.000535757	1.26885e-07	0.000178508
5370	26	3.1196e-07	0.000387863	1.03562e-07	0.00012876	9.21486e-07	0.00133899	3.02782e-07	0.000439967	-0.000140237	-0.25874	-4.71211e-05	-0.0869394	1.55874e-06	0.00231877	5.07997e-07	0.000755693	1.0543e-06	0.00158208	3.42561e-07	0.000514046	3.7485e-07	0.000539529	1.24896e-07	0.000179765
5380	26	3.12244e-07	0.00039098	1.03656e-07	0.000129794	9.21571e-07	0.0013482	3.0281e-07	0.000442993	-0.000140085	-0.260142	-4.707e-05	-0.0874103	1.55443e-06	0.00233434	5.06594e-07	0.000760768	1.05066e-06	0.0015926	3.41379e-07	0.000517464	3.66133e-07	0.000543232	1.21991e-07	0.000180999
5390	26	3.09458e-07	0.000394097	1.02731e-07	0.000130829	9.16743e-07	0.00135741	3.01223e-07	0.000446018	-0.000139936	-0.261542	-4.70201e-05	-0.0878808	1.55782e-06	0.00234987	5.07698e-07	0.00076583	1.05198e-06	0.00160311	3.41806e-07	0.000520878	3.55862e-07	0.000546848	1.18569e-07	0.000182204
5400	26	3.04397e-07	0.000397172	1.01051e-07	0.00013185	9.19442e-07	0.0013666	3.0211e-07	0.000449038	-0.000139796	-0.262941	-4.69729e-05	-0.0883507	1.55023e-06	0.00236543	5.05226e-07	0.0007709	1.05176e-06	0.00161362	3.41737e-07	0.000524294	3.44159e-07	0.000550327	1.1467e-07	0.000183363
5410	26	3.08912e-07	0.000400232	1.0255e-07	0.000132866	9.12613e-07	0.00137576	2.99866e-07	0.000452048	-0.000139658	-0.264338	-4.69266e-05	-0.0888202	1.53894e-06	0.00238086	5.01546e-07	0.000775928	1.05413e-06	0.00162415	3.42506e-07	0.000527714	3.57825e-07	0.000553836	1.19223e-07	0.000184532
5420	26	2.98949e-07	0.000403274	9.92429e-08	0.000133876	9.11255e-07	0.00138489	2.9942e-07	0.000455046	-0.000139535	-0.265734	-4.68851e-05	-0.0892893	1.54902e-06	0.00239631	5.0483e-07	0.000780965	1.05832e-06	0.00163472	3.43867e-07	0.00053115	3.56614e-07	0.000557402	1.1882e-07	0.00018572
5430	26	2.91652e-07	0.000406213	9.68203e-08	0.000134852	8.88766e-07	0.00139388	2.92031e-07	0.000458002	-0.000139413	-0.267129	-4.68443e-05	-0.0897579	1.55005e-06	0.0024118	5.05166e-07	0.000786013	1.05414e-06	0.00164527	3.4251e-07	0.000534579	3.70847e-07	0.000561035	1.23562e-07	0.000186931
5440	26	2.96478e-07	0.000409137	9.84224e-08	0.000135822	8.87673e-07	0.00140275	2.91672e-07	0.000460916	-0.000139268	-0.268522	-4.67955e-05	-0.0902261	1.54325e-06	0.00242728	5.02948e-07	0.000791057	1.05596e-06	0.00165582	3.43101e-07	0.000538007	3.77246e-07	0.000564779	1.25694e-07	0.000188178
5450	26	2.94395e-07	0.00041211	9.7731e-08	0.000136809	8.98975e-07	0.00141168	2.95385e-07	0.00046385	-0.00013913	-0.269914	-4.67492e-05	-0.0906938	1.55461e-06	0.00244275	5.06651e-07	0.000796098	1.05919e-06	0.00166641	3.44149e-07	0.000541446	3.78025e-07	0.000568537	1.25954e-07	0.00018943
5460	26	2.83211e-07	0.000414987	9.40183e-08	0.000137764	9.09469e-07	0.00142072	2.98833e-07	0.000466821	-0.000138991	-0.271305	-4.67025e-05	-0.0911611	1.54563e-06	0.00245826	5.03726e-07	0.000801152	1.05587e-06	0.00167696	3.43071e-07	0.000544875	3.70182e-07	0.000572265	1.23341e-07	0.000190672
5470	26	2.7736e-07	0.000417788	9.20759e-08	0.000138694	9.07848e-07	0.00142981	2.98301e-07	0.000469808	-0.000138852	-0.272694	-4.66555e-05	-0.0916279	1.54412e-06	0.0024737	5.03233e-07	0.000806186	1.05704e-06	0.00168753	3.43451e-07	0.00054831	3.5697e-07	0.000575903	1.18939e-07	0.000191885
5480	26	2.91831e-07	0.000420617	9.68796e-08	0.000139633	9.16669e-07	0.00143893	3.01199e-07	0.000472802	-0.000138717	-0.274082	-4.66102e-05	-0.0920942	1.55516e-06	0.00248919	5.0683e-07	0.000811233	1.06289e-06	0.00169813	3.45352e-07	0.000551751	3.52615e-07	0.000579446	1.17487e-07	0.000193065
5490	26	2.88463e-07	0.000423517	9.57618e-08	0.000140596	9.26814e-07	0.00144811	3.04532e-07	0.000475819	-0.000138591	-0.275468	-4.65679e-05	-0.0925601	1.53917e-06	0.00250467	5.0162e-07	0.000816279	1.05703e-06	0.00170871	3.43447e-07	0.000555192	3.60499e-07	0.000582985	1.20114e-07	0.000194244
5500	26	2.94997e-07	0.000426458	9.79308e-08	0.000141572	9.31796e-07	0.00145741	3.06169e-07	0.000478875	-0.000138474	-0.276853	-4.65287e-05	-0.0930256	1.55311e-06	0.00252013	5.06164e-07	0.000821318	1.05539e-06	0.00171928	3.42914e-07	0.000558623	3.75984e-07	0.000586682	1.25274e-07	0.000195476
5510	26	2.89575e-07	0.000429362	9.61307e-08	0.000142536	9.3967e-07	0.00146676	3.08757e-07	0.000481949	-0.000138342	-0.278238	-4.64843e-05	-0.0934907	1.55543e-06	0.00253567	5.0692e-07	0.000826382	1.05951e-06	0.00172985	3.44255e-07	0.000562059	3.7985e-07	0.00059047	1.26562e-07	0.000196738
5520	26	2.83772e-07	0.000432239	9.42046e-08	0.000143491	9.35958e-07	0.00147614	3.07537e-07	0.000485031	-0.000138212	-0.27962	-4.64405e-05	-0.0939553	1.58134e-06	0.00255135	5.15364e-07	0.00083149	1.06434e-06	0.00174047	3.45822e-07	0.000565511	3.73223e-07	0.000594229	1.24354e-07	0.000197991
5530	26	2.82956e-07	0.000435082	9.39336e-08	0.000144435	9.31618e-07	0.00148549	3.06111e-07	0.000488101	-0.000138087	-0.281002	-4.63986e-05	-0.0944195	1.5752e-06	0.00256716	5.13361e-07	0.000836644	1.06435e-06	0.00175108	3.45828e-07	0.000568958	3.74866e-07	0.000597959	1.24901e-07	0.000199233
5540	26	2.97451e-07	0.000437975	9.87455e-08	0.000145396	9.33763e-07	0.00149481	3.06816e-07	0.000491164	-0.000137957	-0.282382	-4.63551e-05	-0.0948833	1.56983e-06	0.00258288	5.11613e-07	0.000841769	1.07441e-06	0.00176178	3.49094e-07	0.000572435	3.64879e-07	0.000601662	1.21574e-07	0.000200467
5550	26	3.06646e-07	0.000441003	1.01798e-07	0.000146401	9.42399e-07	0.00150418	3.09653e-07	0.000494245	-0.000137828	-0.283761	-4.63118e-05	-0.0953466	1.56567e-06	0.00259856	5.10256e-07	0.000846876	1.07878e-06	0.00177255	3.50514e-07	0.000575935	3.69453e-07	0.000605324	1.23098e-07	0.000201687
5560	26	2.97236e-07	0.000444041	9.86742e-08	0.000147409	9.62461e-07	0.00151371	3.16245e-07	0.000497375	-0.000137688	-0.285139	-4.62646e-05	-0.0958095	1.57484e-06	0.00261424	5.13246e-07	0.000851987	1.08327e-06	0.00178337	3.51973e-07	0.00057945	3.75838e-07	0.00060906	1.25225e-07	0.000202932
5570	26	2.96457e-07	0.000447001	9.84155e-08	0.000148392	9.84209e-07	0.00152345	3.23391e-07	0.000500576	-0.000137556	-0.286515	-4.62204e-05	-0.0962719	1.58037e-06	0.00263002	5.15047e-07	0.000857132	1.07755e-06	0.00179418	3.50117e-07	0.00058296	3.75406e-07	0.000612815	1.25081e-07	0.000204183
5580	26	3.04501e-07	0.000450007	1.01086e-07	0.00014939	9.93079e-07	0.00153334	3.26306e-07	0.000503824	-0.000137436	-0.28789	-4.61798e-05	-0.0967339	1.56773e-06	0.00264577	5.10928e-07	0.000862263	1.07219e-06	0.00180491	3.48375e-07	0.000586449	3.63581e-07	0.000616516	1.21141e-07	0.000205416
5590	26	2.99815e-07	0.000453035	9.95301e-08	0.000150395	9.99657e-07	0.00154331	3.28467e-07	0.0005071	-0.000137288	-0.289263	-4.61302e-05	-0.0971955	1.57874e-06	0.00266148	5.14517e-07	0.000867383	1.07015e-06	0.00181565	3.47711e-07	0.000589936	3.53062e-07	0.000620101	1.17636e-07	0.000206611
5600	26	2.98685e-07	0.000456044	9.91551e-08	0.000151394	1.00198e-06	0.0015533	3.29229e-07	0.000510385	-0.000137143	-0.290636	-4.60813e-05	-0.0976565	1.58352e-06	0.00267731	5.16073e-07	0.000872544	1.06206e-06	0.0018263	3.45083e-07	0.000593396	3.61584e-07	0.000623662	1.20476e-07	0.000207797
5610	26	2.91314e-07	0.000458987	9.6708e-08	0.000152371	1.00924e-06	0.00156335	3.31618e-07	0.000513684	-0.000137007	-0.292006	-4.60357e-05	-0.0981171	1.59616e-06	0.0026932	5.20194e-07	0.00087772	1.07285e-06	0.00183696	3.4859e-07	0.000596862	3.80288e-07	0.000627381	1.26708e-07	0.000209036
5620	26	2.7926e-07	0.000461816	9.27064e-08	0.00015331	1.00047e-06	0.00157337	3.28735e-07	0.000516977	-0.000136872	-0.293376	-4.59904e-05	-0.0985772	1.5941e-06	0.00270918	5.19521e-07	0.000882931	1.08478e-06	0.00184777	3.52463e-07	0.000600373	3.73965e-07	0.00063113	1.24601e-07	0.000210285
5630	26	2.82884e-07	0.000464615	9.39097e-08	0.000154239	1.00432e-06	0.00158341	3.30001e-07	0.000520276	-0.000136743	-0.294744	-4.59472e-05	-0.0990369	1.58964e-06	0.00272509	5.18067e-07	0.000888115	1.08775e-06	0.00185863	3.5343e-07	0.000603902	3.83797e-07	0.000634916	1.27877e-07	0.000211547
5640	26	2.9649e-07	0.000467525	9.84266e-08	0.000155205	9.86857e-07	0.00159335	3.24261e-07	0.000523543	-0.000136618	-0.296111	-4.59049e-05	-0.0994962	1.59017e-06	0.00274099	5.18242e-07	0.000893297	1.09412e-06	0.00186954	3.55498e-07	0.000607447	3.95925e-07	0.000638811	1.31918e-07	0.000212845
5650	26	3.02906e-07	0.000470516	1.00556e-07	0.000156198	9.93225e-07	0.00160324	3.26354e-07	0.000526794	-0.000136496	-0.297476	-4.58639e-05	-0.099955	1.58404e-06	0.00275687	5.16244e-07	0.000898472	1.09273e-06	0.00188048	3.55047e-07	0.000611001	4.14327e-07	0.000642864	1.38049e-07	0.000214195
5660	26	2.96395e-07	0.000473538	9.83951e-08	0.000157202	9.96863e-07	0.0016132	3.27549e-07	0.000530066	-0.00013638	-0.29884	-4.58251e-05	-0.100413	1.58187e-06	0.00277268	5.15536e-07	0.000903625	1.08556e-06	0.00189139	3.52717e-07	0.000614547	4.14875e-07	0.000646989	1.38232e-07	0.00021557
5670	26	2.86681e-07	0.00047646	9.51701e-08	0.000158172	9.80622e-07	0.00162309	3.22213e-07	0.000533316	-0.000136268	-0.300204	-4.57876e-05	-0.100872	1.58731e-06	0.00278854	5.1731e-07	0.000908793	1.07985e-06	0.00190222	3.50863e-07	0.000618065	4.15013e-07	0.000651145	1.38278e-07	0.000216954
5680	26	2.71456e-07	0.000479237	9.0116e-08	0.000159093	9.7018e-07	0.00163285	3.18781e-07	0.000536523	-0.000136144	-0.301566	-4.57459e-05	-0.101329	1.57863e-06	0.00280438	5.14479e-07	0.000913955	1.07101e-06	0.00191297	3.47991e-07	0.000621559	4.15251e-07	0.000655298	1.38357e-07	0.000218338
5690	26	2.79265e-07	0.000481987	9.27082e-08	0.000160006	9.55956e-07	0.00164247	3.14108e-07	0.000539684	-0.000136032	-0.302927	-4.57082e-05	-0.101786	1.58533e-06	0.00282018	5.16662e-07	0.000919105	1.07351e-06	0.00192369	3.48802e-07	0.000625041	4.016e-07	0.000659386	1.33809e-07	0.0002197
5700	26	2.78096e-07	0.000484786	9.23201e-08	0.000160935	9.57197e-07	0.00165204	3.14516e-07	0.000542828	-0.000135904	-0.304286	-4.56653e-05	-0.102243	1.57442e-06	0.00283599	5.13108e-07	0.000924258	1.07206e-06	0.00193441	3.48333e-07	0.000628526	3.88512e-07	0.000663334	1.29448e-07	0.000221015
5710	26	2.66277e-07	0.000487494	8.83967e-08	0.000161835	9.49333e-07	0.00166157	3.11932e-07	0.00054596	-0.000135782	-0.305645	-4.56241e-05	-0.1027	1.5652e-06	0.00285167	5.10104e-07	0.000929366	1.05474e-06	0.00194505	3.42703e-07	0.000631982	3.79791e-07	0.00066719	1.26542e-07	0.0002223
5720	26	2.75297e-07	0.000490202	9.13909e-08	0.000162733	9.64952e-07	0.00167115	3.17064e-07	0.000549105	-0.000135661	-0.307002	-4.55834e-05	-0.103156	1.57428e-06	0.00286737	5.13063e-07	0.000934483	1.05346e-06	0.00195559	3.42288e-07	0.000635407	3.77637e-07	0.000670969	1.25824e-07	0.000223559
5730	26	2.73924e-07	0.000492954	9.09351e-08	0.000163647	9.68352e-07	0.00168082	3.18181e-07	0.000552284	-0.000135552	-0.308358	-4.55467e-05	-0.103611	1.5958e-06	0.00288321	5.20077e-07	0.000939645	1.05424e-06	0.00196612	3.42541e-07	0.000638827	3.69816e-07	0.000674706	1.23219e-07	0.000224804
5740	26	2.87541e-07	0.000495744	9.54555e-08	0.000164573	9.72603e-07	0.00169051	3.19578e-07	0.000555468	-0.00013543	-0.309713	-4.55058e-05	-0.104067	1.60803e-06	0.00289925	5.24063e-07	0.000944872	1.06409e-06	0.00197673	3.45741e-07	0.000642276	3.82833e-07	0.000678467	1.27556e-07	0.000226058
5750	26	2.89907e-07	0.00049862	9.62412e-08	0.000165528	9.90119e-07	0.00170034	3.25333e-07	0.000558698	-0.000135306	-0.311067	-4.54643e-05	-0.104522	1.60223e-06	0.00291531	5.22172e-07	0.000950107	1.06067e-06	0.00198734	3.44629e-07	0.000645723	3.82991e-07	0.000682273	1.27609e-07	0.000227326
5760	26	2.97288e-07	0.000501559	9.86914e-08	0.000166504	9.91385e-07	0.00171026	3.25749e-07	0.000561956	-0.00013519	-0.312419	-4.54251e-05	-0.104976	1.60315e-06	0.00293132	5.22471e-07	0.000955325	1.07135e-06	0.001998	3.481e-07	0.000649185	3.95666e-07	0.000686168	1.31832e-07	0.000228624
5770	26	2.85024e-07	0.000504455	9.46202e-08	0.000167465	9.70699e-07	0.00172005	3.18952e-07	0.000565173	-0.000135074	-0.31377	-4.53861e-05	-0.10543	1.59556e-06	0.00294734	5.19998e-07	0.000960545	1.07748e-06	0.00200875	3.50093e-07	0.000652679	3.88556e-07	0.000690097	1.29463e-07	0.000229933
5780	26	2.74965e-07	0.00050727	9.12807e-08	0.000168399	9.62989e-07	0.00172972	3.16419e-07	0.000568352	-0.000134948	-0.315121	-4.5344e-05	-0.105884	1.59677e-06	0.00296328	5.20393e-07	0.000965742	1.07745e-06	0.00201952	3.50083e-07	0.000656179	3.77968e-07	0.000693916	1.25935e-07	0.000231205
5790	26	2.65488e-07	0.00050996	8.81347e-08	0.000169293	9.52526e-07	0.0017393	3.12981e-07	0.000571499	-0.000134819	-0.316469	-4.53007e-05	-0.106337	1.59605e-06	0.00297925	5.20159e-07	0.000970944	1.07631e-06	0.00203028	3.49711e-07	0.000659675	3.89454e-07	0.000697761	1.29762e-07	0.000232486
5800	26	2.69579e-07	0.000512636	8.94926e-08	0.000170181	9.57707e-07	0.00174887	3.14683e-07	0.000574643	-0.000134691	-0.317817	-4.52575e-05	-0.10679	1.58886e-06	0.00299516	5.17813e-07	0.000976129	1.07108e-06	0.00204102	3.48013e-07	0.000663165	3.86652e-07	0.000701643	1.28828e-07	0.00023378
5810	26	2.6556e-07	0.000515324	8.81585e-08	0.000171073	9.59048e-07	0.00175844	3.15124e-07	0.000577787	-0.000134571	-0.319163	-4.52173e-05	-0.107242	1.57899e-06	0.00301097	5.14599e-07	0.000981284	1.0751e-06	0.00205177	3.49319e-07	0.000666657	3.96953e-07	0.000705545	1.3226e-07	0.00023508
5820	26	2.73046e-07	0.000517994	9.06437e-08	0.000171959	9.66882e-07	0.00176807	3.17698e-07	0.000580953	-0.00013445	-0.320508	-4.51767e-05	-0.107694	1.58167e-06	0.00302677	5.1547e-07	0.000986434	1.07803e-06	0.00206252	3.5027e-07	0.000670149	3.96032e-07	0.000709538	1.31954e-07	0.00023641
5830	26	2.80041e-07	0.000520773	9.29658e-08	0.000172882	9.75938e-07	0.00177779	3.20674e-07	0.000584145	-0.000134311	-0.321852	-4.51299e-05	-0.108146	1.58361e-06	0.0030426	5.16101e-07	0.000991591	1.07732e-06	0.0020733	3.5004e-07	0.000673653	3.75219e-07	0.000713393	1.25019e-07	0.000237695
5840	26	2.6399e-07	0.000523484	8.76372e-08	0.000173782	9.75674e-07	0.00178754	3.20587e-07	0.00058735	-0.00013419	-0.323195	-4.50893e-05	-0.108597	1.58444e-06	0.00305845	5.16374e-07	0.000996757	1.07476e-06	0.00208406	3.49208e-07	0.000677148	3.5756e-07	0.000717058	1.19135e-07	0.000238916
5850	26	2.59356e-07	0.000526095	8.60989e-08	0.000174649	9.79241e-07	0.00179731	3.21759e-07	0.000590561	-0.00013408	-0.324536	-4.50523e-05	-0.109047	1.57893e-06	0.00307426	5.14578e-07	0.00100191	1.0783e-06	0.00209482	3.50359e-07	0.000680646	3.54612e-07	0.000720614	1.18153e-07	0.000240101
5860	26	2.57462e-07	0.000528683	8.54701e-08	0.000175508	9.70834e-07	0.00180707	3.18996e-07	0.000593767	-0.000133974	-0.325876	-4.50167e-05	-0.109498	1.59556e-06	0.00309013	5.19999e-07	0.00100708	1.06996e-06	0.00210557	3.47651e-07	0.000684139	3.59605e-07	0.000724184	1.19816e-07	0.00024129
5870	26	2.51819e-07	0.000531221	8.35969e-08	0.000176351	9.6905e-07	0.00181677	3.1841e-07	0.000596952	-0.000133852	-0.327215	-4.49757e-05	-0.109948	1.5987e-06	0.00310612	5.21022e-07	0.00101229	1.0572e-06	0.00211619	3.43503e-07	0.000687589	3.58744e-07	0.000727764	1.19529e-07	0.000242483
5880	26	2.4365e-07	0.000533716	8.0885e-08	0.000177179	9.65754e-07	0.00182644	3.17327e-07	0.000600133	-0.000133719	-0.328553	-4.4931e-05	-0.110397	1.59421e-06	0.00312208	5.19557e-07	0.00101749	1.04512e-06	0.00212672	3.39577e-07	0.000691008	3.68593e-07	0.000731409	1.22811e-07	0.000243697
5890	26	2.38869e-07	0.000536126	7.92979e-08	0.000177979	9.55735e-07	0.00183605	3.14035e-07	0.000603288	-0.000133596	-0.32989	-4.48896e-05	-0.110846	1.59557e-06	0.00313803	5.2e-07	0.00102269	1.04775e-06	0.00213716	3.40434e-07	0.000694403	3.76852e-07	0.000735145	1.25563e-07	0.000244942
5900	26	2.44506e-07	0.000538528	8.11691e-08	0.000178776	9.57067e-07	0.00184561	3.14473e-07	0.00060643	-0.000133478	-0.331225	-4.48499e-05	-0.111295	1.5778e-06	0.00315391	5.1421e-07	0.00102787	1.04396e-06	0.00214762	3.39201e-07	0.000697801	3.69089e-07	0.000738883	1.22976e-07	0.000246188
5910	26	2.40068e-07	0.000540985	7.96959e-08	0.000179592	9.53823e-07	0.00185517	3.13407e-07	0.000609572	-0.000133369	-0.332559	-4.48135e-05	-0.111743	1.55942e-06	0.00316959	5.08218e-07	0.00103298	1.04444e-06	0.00215806	3.39358e-07	0.000701193	3.55485e-07	0.000742496	1.18444e-07	0.000247391
5920	26	2.37579e-07	0.000543353	7.88697e-08	0.000180378	9.59524e-07	0.00186473	3.1528e-07	0.000612712	-0.000133248	-0.333893	-4.47728e-05	-0.112191	1.56679e-06	0.00318522	5.10623e-07	0.00103807	1.0477e-06	0.00216851	3.40416e-07	0.000704589	3.58557e-07	0.000746079	1.19467e-07	0.000248585
5930	26	2.48644e-07	0.000545802	8.25429e-08	0.000181191	9.68225e-07	0.00187436	3.18139e-07	0.000615876	-0.000133121	-0.335224	-4.473e-05	-0.112639	1.57287e-06	0.0032009	5.12602e-07	0.00104318	1.06054e-06	0.00217906	3.44587e-07	0.000708016	3.56839e-07	0.000749657	1.18895e-07	0.000249777
5940	26	2.3832e-07	0.000548266	7.91156e-08	0.000182009	9.74836e-07	0.00188406	3.20311e-07	0.000619065	-0.000133008	-0.336555	-4.46921e-05	-0.113086	1.57025e-06	0.00321662	5.11749e-07	0.00104831	1.0567e-06	0.00218965	3.4334e-07	0.000711455	3.61936e-07	0.000753226	1.20593e-07	0.000250967
5950	26	2.28572e-07	0.0005506	7.58794e-08	0.000182784	9.73307e-07	0.0018938	3.19809e-07	0.000622266	-0.0001329	-0.337885	-4.46557e-05	-0.113533	1.55951e-06	0.00323226	5.0825e-07	0.0010534	1.05183e-06	0.00220019	3.41759e-07	0.000714882	3.62118e-07	0.000756865	1.20654e-07	0.000252179
5960	26	2.24989e-07	0.000552861	7.46901e-08	0.000183534	9.64604e-07	0.00190351	3.1695e-07	0.000625454	-0.000132799	-0.339213	-4.46217e-05	-0.113979	1.57064e-06	0.0032479	5.11875e-07	0.0010585	1.05173e-06	0.00221071	3.41726e-07	0.000718299	3.56227e-07	0.000760438	1.18691e-07	0.00025337
5970	26	2.18979e-07	0.000555086	7.26949e-08	0.000184273	9.41881e-07	0.00191304	3.09483e-07	0.000628587	-0.000132697	-0.340541	-4.45875e-05	-0.114425	1.56347e-06	0.00326358	5.09539e-07	0.00106361	1.04473e-06	0.00222119	3.39452e-07	0.000721704	3.44057e-07	0.000763952	1.14636e-07	0.00025454
5980	26	1.94025e-07	0.000557141	6.44109e-08	0.000184955	9.37705e-07	0.00192244	3.08111e-07	0.000631674	-0.000132578	-0.341867	-4.45477e-05	-0.114871	1.5473e-06	0.00327914	5.0427e-07	0.00106868	1.04785e-06	0.00223168	3.40465e-07	0.000725112	3.33203e-07	0.000767319	1.11019e-07	0.000255662
5990	26	1.91697e-07	0.000559057	6.36381e-08	0.000185592	9.28768e-07	0.00193176	3.05174e-07	0.000634738	-0.000132458	-0.343192	-4.45074e-05	-0.115316	1.54033e-06	0.00329455	5.01996e-07	0.0010737	1.06022e-06	0.00224221	3.44483e-07	0.000728534	3.42156e-07	0.000770696	1.14002e-07	0.000256787
6000	26	1.83655e-07	0.000560958	6.09684e-08	0.000186222	9.325e-07	0.00194106	3.06401e-07	0.000637792	-0.000132342	-0.344516	-4.44684e-05	-0.115761	1.54935e-06	0.00330999	5.04936e-07	0.00107873	1.07686e-06	0.0022529	3.49892e-07	0.000732006	3.41788e-07	0.000774122	1.1388e-07	0.000257929
6010	26	1.76686e-07	0.000562754	5.86547e-08	0.000186819	9.33822e-07	0.00195039	3.06835e-07	0.00064086	-0.000132228	-0.345839	-4.44298e-05	-0.116205	1.56677e-06	0.00332557	5.10614e-07	0.00108381	1.08099e-06	0.00226369	3.51233e-07	0.000735515	3.3811e-07	0.000777551	1.12654e-07	0.000259072
6020	26	1.79856e-07	0.000564538	5.97071e-08	0.000187411	9.42475e-07	0.00195977	3.09678e-07	0.000643942	-0.000132116	-0.347161	-4.43923e-05	-0.11665	1.57025e-06	0.00334125	5.11749e-07	0.00108892	1.07532e-06	0.00227449	3.49391e-07	0.000739021	3.3439e-07	0.000780903	1.11415e-07	0.000260188
6030	26	1.72411e-07	0.000566304	5.72356e-08	0.000187997	9.45846e-07	0.00196922	3.10786e-07	0.000647045	-0.000132001	-0.348481	-4.43535e-05	-0.117093	1.57441e-06	0.00335697	5.13104e-07	0.00109405	1.06634e-06	0.00228519	3.46472e-07	0.000742499	3.23582e-07	0.000784194	1.07814e-07	0.000261285
6040	26	1.69164e-07	0.000568003	5.61577e-08	0.000188561	9.45075e-07	0.00197867	3.10533e-07	0.000650152	-0.00013187	-0.349801	-4.43098e-05	-0.117537	1.57561e-06	0.00337272	5.13497e-07	0.00109918	1.065e-06	0.00229585	3.46037e-07	0.000745963	3.27755e-07	0.000787442	1.09204e-07	0.000262367
6050	26	1.62922e-07	0.000569676	5.40856e-08	0.000189117	9.54346e-07	0.00198819	3.13579e-07	0.000653279	-0.000131749	-0.351119	-4.4269e-05	-0.117979	1.58018e-06	0.00338851	5.14984e-07	0.00110433	1.05619e-06	0.00230646	3.43175e-07	0.00074941	3.29493e-07	0.000790731	1.09783e-07	0.000263463
6060	26	1.69598e-07	0.000571325	5.6302e-08	0.000189664	9.51291e-07	0.00199772	3.12575e-07	0.000656411	-0.000131623	-0.352436	-4.42265e-05	-0.118422	1.58301e-06	0.00340432	5.15908e-07	0.00110948	1.05468e-06	0.00231701	3.42686e-07	0.000752837	3.26752e-07	0.000794011	1.0887e-07	0.000264556
6070	26	1.73364e-07	0.000573047	5.7552e-08	0.000190236	9.65105e-07	0.00200728	3.17114e-07	0.00065955	-0.000131514	-0.353751	-4.41899e-05	-0.118864	1.58756e-06	0.00342019	5.17391e-07	0.00111465	1.04307e-06	0.00232751	3.38911e-07	0.00075625	3.37999e-07	0.00079734	1.12618e-07	0.000265665
6080	26	1.76322e-07	0.000574801	5.85342e-08	0.000190818	9.80348e-07	0.00201703	3.22123e-07	0.000662754	-0.00013139	-0.355066	-4.41483e-05	-0.119306	1.57635e-06	0.00343603	5.13736e-07	0.00111981	1.04925e-06	0.00233796	3.40919e-07	0.000759644	3.44101e-07	0.000800769	1.14651e-07	0.000266807
6090	26	1.8444e-07	0.000576594	6.12288e-08	0.000191413	9.71943e-07	0.0020268	3.19361e-07	0.000665965	-0.000131261	-0.356379	-4.4105e-05	-0.119747	1.56743e-06	0.00345172	5.10829e-07	0.00112493	1.05754e-06	0.00234849	3.43613e-07	0.000763065	3.35621e-07	0.000804172	1.11825e-07	0.000267941
6100	26	1.80923e-07	0.000578426	6.00615e-08	0.000192021	9.65195e-07	0.00203648	3.17144e-07	0.000669146	-0.000131133	-0.357691	-4.40619e-05	-0.120188	1.57622e-06	0.00346746	5.13696e-07	0.00113006	1.05451e-06	0.00235905	3.42629e-07	0.000766498	3.45334e-07	0.000807578	1.15062e-07	0.000269076
6110	26	1.90215e-07	0.000580278	6.31461e-08	0.000192636	9.61528e-07	0.00204612	3.15939e-07	0.000672313	-0.000131022	-0.359002	-4.40249e-05	-0.120628	1.58303e-06	0.00348325	5.15915e-07	0.0011352	1.05677e-06	0.0023696	3.43364e-07	0.000769924	3.42866e-07	0.000811021	1.14239e-07	0.000270223
6120	26	1.98413e-07	0.000582221	6.58675e-08	0.000193281	9.58628e-07	0.0020557	3.14986e-07	0.000675462	-0.0001309	-0.360311	-4.39839e-05	-0.121068	1.59062e-06	0.00349912	5.18389e-07	0.00114037	1.07638e-06	0.00238028	3.49736e-07	0.000773394	3.43872e-07	0.000814447	1.14574e-07	0.000271365
6130	26	1.91383e-07	0.000584181	6.35339e-08	0.000193932	9.60234e-07	0.00206531	3.15514e-07	0.000678619	-0.000130768	-0.36162	-4.39395e-05	-0.121508	1.59932e-06	0.00351506	5.21223e-07	0.00114557	1.06584e-06	0.002391	3.46311e-07	0.000776879	3.53844e-07	0.000817931	1.17897e-07	0.000272526
6140	26	1.88243e-07	0.000586054	6.24914e-08	0.000194554	9.42028e-07	0.00207483	3.09531e-07	0.000681747	-0.000130657	-0.362927	-4.3902e-05	-0.121947	1.60011e-06	0.00353108	5.21479e-07	0.00115079	1.06187e-06	0.00240164	3.4502e-07	0.000780336	3.53799e-07	0.000821471	1.17882e-07	0.000273705
6150	26	2.1511e-07	0.000588075	7.14104e-08	0.000195224	9.31314e-07	0.0020842	3.06011e-07	0.000684826	-0.000130548	-0.364233	-4.38655e-05	-0.122386	1.59657e-06	0.00354706	5.20326e-07	0.001156	1.06077e-06	0.00241225	3.44663e-07	0.000783784	3.69897e-07	0.000825098	1.23246e-07	0.000274914
6160	26	2.16372e-07	0.000590248	7.18295e-08	0.000195946	9.29508e-07	0.00209349	3.05418e-07	0.00068788	-0.000130427	-0.365538	-4.38247e-05	-0.122824	1.59227e-06	0.003563	5.18927e-07	0.00116119	1.05505e-06	0.00242283	3.42805e-07	0.000787221	3.81727e-07	0.000828849	1.27187e-07	0.000276163
6170	26	2.23033e-07	0.000592424	7.40407e-08	0.000196668	9.44162e-07	0.00210285	3.10233e-07	0.000690955	-0.00013029	-0.366841	-4.37789e-05	-0.123262	1.59666e-06	0.00357894	5.20356e-07	0.00116639	1.05632e-06	0.00243338	3.43216e-07	0.000790649	3.8845e-07	0.000832713	1.29427e-07	0.000277451
6180	26	2.40909e-07	0.000594748	7.99751e-08	0.00019744	9.45301e-07	0.00211233	3.10607e-07	0.000694068	-0.000130156	-0.368144	-4.37337e-05	-0.1237	1.59436e-06	0.00359492	5.19606e-07	0.00117159	1.06113e-06	0.002444	3.44779e-07	0.0007941	3.85223e-07	0.000836598	1.28352e-07	0.000278745
6190	26	2.41745e-07	0.000597173	8.02526e-08	0.000198245	9.52849e-07	0.00212177	3.13087e-07	0.000697171	-0.000130043	-0.369445	-4.36958e-05	-0.124137	1.58591e-06	0.0036108	5.16852e-07	0.00117677	1.05735e-06	0.00245459	3.43552e-07	0.000797542	3.82249e-07	0.000840425	1.27361e-07	0.00028002
6200	26	2.26113e-07	0.000599491	7.50634e-08	0.000199014	9.59578e-07	0.00213132	3.15298e-07	0.000700308	-0.000129936	-0.370744	-4.36598e-05	-0.124574	1.599e-06	0.00362672	5.21118e-07	0.00118196	1.06356e-06	0.00246519	3.45569e-07	0.000800984	3.80245e-07	0.000844237	1.26693e-07	0.000281291
6210	26	2.21972e-07	0.000601723	7.36886e-08	0.000199755	9.6263e-07	0.00214094	3.16301e-07	0.000703469	-0.000129806	-0.372043	-4.36161e-05	-0.12501	1.59875e-06	0.00364271	5.21036e-07	0.00118717	1.06514e-06	0.00247584	3.46085e-07	0.000804444	3.79835e-07	0.000848039	1.26557e-07	0.000282557
6220	26	2.25899e-07	0.000603965	7.49922e-08	0.000200499	9.62202e-07	0.00215056	3.1616e-07	0.00070663	-0.000129684	-0.373341	-4.35752e-05	-0.125446	1.60564e-06	0.00365872	5.23282e-07	0.00119239	1.06699e-06	0.00248649	3.46683e-07	0.000807905	3.7239e-07	0.000851809	1.24076e-07	0.000283813
6230	26	2.32961e-07	0.000606268	7.73365e-08	0.000201264	9.78419e-07	0.00216026	3.21489e-07	0.000709818	-0.000129558	-0.374637	-4.35328e-05	-0.125882	1.6178e-06	0.00367484	5.27244e-07	0.00119764	1.06917e-06	0.00249717	3.47393e-07	0.000811376	3.57944e-07	0.000855455	1.19263e-07	0.000285028
6240	26	2.38414e-07	0.000608615	7.91469e-08	0.000202043	9.85161e-07	0.00217008	3.23704e-07	0.000713046	-0.000129432	-0.375932	-4.34904e-05	-0.126317	1.60656e-06	0.00369097	5.23583e-07	0.0012029	1.07801e-06	0.0025079	3.50266e-07	0.000814862	3.58415e-07	0.000859026	1.1942e-07	0.000286218
6250	26	2.43313e-07	0.000611031	8.07732e-08	0.000202845	9.83077e-07	0.00217994	3.23019e-07	0.000716284	-0.000129313	-0.377225	-4.34505e-05	-0.126752	1.60014e-06	0.003707	5.21491e-07	0.00120812	1.08462e-06	0.00251872	3.52414e-07	0.000818377	3.57581e-07	0.000862614	1.19142e-07	0.000287413
6260	26	2.34976e-07	0.000613427	7.80055e-08	0.000203641	9.70172e-07	0.00218971	3.18779e-07	0.000719493	-0.00012919	-0.378518	-4.34092e-05	-0.127186	1.60407e-06	0.00372303	5.22772e-07	0.00121335	1.08432e-06	0.00252957	3.52316e-07	0.000821902	3.57996e-07	0.00086619	1.1928e-07	0.000288605
6270	26	2.3837e-07	0.00061579	7.91321e-08	0.000204425	9.70048e-07	0.00219939	3.18738e-07	0.000722676	-0.000129082	-0.379809	-4.33729e-05	-0.12762	1.60318e-06	0.00373906	5.22481e-07	0.00121857	1.07562e-06	0.00254039	3.49487e-07	0.000825418	3.58599e-07	0.000869768	1.19481e-07	0.000289797
6280	26	2.29916e-07	0.000618139	7.63258e-08	0.000205205	9.8627e-07	0.00220919	3.24068e-07	0.000725896	-0.000128957	-0.3811	-4.33309e-05	-0.128053	1.60499e-06	0.00375509	5.23071e-07	0.00122379	1.06851e-06	0.00255109	3.4718e-07	0.000828896	3.58506e-07	0.000873358	1.1945e-07	0.000290993
6290	26	2.28931e-07	0.000620435	7.59986e-08	0.000205967	9.84176e-07	0.00221904	3.2338e-07	0.000729134	-0.000128823	-0.382388	-4.32858e-05	-0.128486	1.61989e-06	0.00377122	5.27925e-07	0.00122905	1.05342e-06	0.00256172	3.42274e-07	0.00083235	3.63332e-07	0.000876948	1.21058e-07	0.000292189
6300	26	2.30067e-07	0.000622714	7.63759e-08	0.000206724	9.77209e-07	0.00222883	3.21091e-07	0.00073235	-0.000128711	-0.383676	-4.32482e-05	-0.128919	1.61251e-06	0.00378738	5.25521e-07	0.00123432	1.06604e-06	0.0025723	3.46376e-07	0.000835787	3.59914e-07	0.000880551	1.19919e-07	0.00029339
6310	26	2.40772e-07	0.000625079	7.99297e-08	0.000207509	9.88057e-07	0.00223867	3.24656e-07	0.000735582	-0.000128601	-0.384963	-4.32112e-05	-0.129351	1.61384e-06	0.0038035	5.25955e-07	0.00123957	1.06748e-06	0.00258299	3.46845e-07	0.000839261	3.76859e-07	0.000884224	1.25565e-07	0.000294614
6320	26	2.4141e-07	0.000627488	8.01415e-08	0.000208309	9.85966e-07	0.00224854	3.23968e-07	0.000738826	-0.000128488	-0.386248	-4.31732e-05	-0.129783	1.61824e-06	0.00381966	5.27388e-07	0.00124484	1.06825e-06	0.00259367	3.47092e-07	0.000842729	3.81577e-07	0.000888024	1.27137e-07	0.00029588
6330	26	2.45351e-07	0.000629937	8.14496e-08	0.000209122	9.82751e-07	0.00225839	3.22912e-07	0.000742063	-0.000128376	-0.387532	-4.31356e-05	-0.130215	1.63137e-06	0.00383592	5.31668e-07	0.00125014	1.06875e-06	0.00260437	3.47257e-07	0.000846205	3.78629e-07	0.000891821	1.26155e-07	0.000297145
6340	26	2.33709e-07	0.000632315	7.7585e-08	0.000209911	9.84271e-07	0.00226823	3.23412e-07	0.000745294	-0.000128257	-0.388816	-4.30958e-05	-0.130646	1.6372e-06	0.00385225	5.33567e-07	0.00125546	1.08056e-06	0.00261509	3.51095e-07	0.000849689	3.84182e-07	0.000895607	1.28005e-07	0.000298406
6350	26	2.46242e-07	0.000634715	8.17456e-08	0.000210708	9.8617e-07	0.00227808	3.24035e-07	0.000748532	-0.000128136	-0.390098	-4.30549e-05	-0.131077	1.64016e-06	0.00386865	5.34533e-07	0.0012608	1.08357e-06	0.00262591	3.5207e-07	0.000853207	4.02884e-07	0.000899569	1.34237e-07	0.000299727
6360	26	2.53169e-07	0.000637221	8.40452e-08	0.00021154	9.93501e-07	0.00228798	3.26445e-07	0.000751783	-0.000128007	-0.391378	-4.30118e-05	-0.131507	1.63548e-06	0.00388503	5.33006e-07	0.00126614	1.08404e-06	0.00263676	3.52223e-07	0.00085673	4.0701e-07	0.000903615	1.35611e-07	0.000301075
6370	26	2.36713e-07	0.00063967	7.85822e-08	0.000212353	9.9279e-07	0.0022979	3.26211e-07	0.000755044	-0.000127878	-0.392658	-4.29684e-05	-0.131937	1.64119e-06	0.0039014	5.34867e-07	0.00127148	1.0804e-06	0.00264756	3.51043e-07	0.00086024	4.05599e-07	0.000907692	1.35141e-07	0.000302433
6380	26	2.28023e-07	0.000641979	7.56974e-08	0.000213119	9.95671e-07	0.00230783	3.27158e-07	0.000758306	-0.000127747	-0.393936	-4.29244e-05	-0.132366	1.63479e-06	0.00391777	5.32782e-07	0.00127681	1.093e-06	0.00265844	3.55137e-07	0.000863774	4.14146e-07	0.000911785	1.37989e-07	0.000303797
6390	26	2.35947e-07	0.000644305	7.83279e-08	0.000213891	1.00064e-06	0.00231781	3.28791e-07	0.000761586	-0.000127637	-0.395213	-4.28875e-05	-0.132796	1.6458e-06	0.00393418	5.36372e-07	0.00128216	1.09388e-06	0.00266936	3.5542e-07	0.000867324	4.17651e-07	0.000915951	1.39157e-07	0.000305185
6400	26	2.46099e-07	0.00064671	8.16979e-08	0.00021469	9.82197e-07	0.00232774	3.2273e-07	0.000764849	-0.00012752	-0.396489	-4.28481e-05	-0.133224	1.66006e-06	0.0039507	5.41018e-07	0.00128754	1.10868e-06	0.00268038	3.60231e-07	0.000870904	4.31362e-07	0.000920219	1.43725e-07	0.000306607
6410	26	2.61402e-07	0.000649259	8.67783e-08	0.000215536	9.74413e-07	0.0023375	3.20173e-07	0.000768056	-0.000127392	-0.397763	-4.2805e-05	-0.133652	1.66871e-06	0.00396735	5.43837e-07	0.00129297	1.11384e-06	0.00269148	3.61906e-07	0.00087451	4.16514e-07	0.000924461	1.38778e-07	0.00030802
6420	26	2.574e-07	0.000651846	8.54498e-08	0.000216395	9.82002e-07	0.00234728	3.22666e-07	0.000771268	-0.000127281	-0.399036	-4.27677e-05	-0.13408	1.65605e-06	0.00398399	5.39712e-07	0.00129839	1.10363e-06	0.00270258	3.58589e-07	0.000878117	4.0929e-07	0.000928587	1.36371e-07	0.000309395
6430	26	2.58235e-07	0.000654437	8.57269e-08	0.000217255	9.9969e-07	0.00235719	3.28478e-07	0.000774525	-0.000127154	-0.400309	-4.2725e-05	-0.134508	1.64e-06	0.00400045	5.34482e-07	0.00130376	1.09771e-06	0.00271358	3.56664e-07	0.000881692	3.988e-07	0.000932631	1.32876e-07	0.000310742
6440	26	2.42976e-07	0.000656941	8.06614e-08	0.000218086	1.00908e-06	0.00236724	3.31564e-07	0.000777827	-0.000127031	-0.40158	-4.26837e-05	-0.134935	1.64825e-06	0.00401689	5.3717e-07	0.00130911	1.08196e-06	0.00272448	3.51548e-07	0.000885232	3.9994e-07	0.000936624	1.33256e-07	0.000312073
6450	26	2.36494e-07	0.000659336	7.85093e-08	0.000218881	1.01771e-06	0.00237737	3.34398e-07	0.000781157	-0.00012689	-0.402849	-4.26363e-05	-0.135361	1.64074e-06	0.00403334	5.34722e-07	0.00131448	1.08029e-06	0.00273528	3.51007e-07	0.000888741	3.96693e-07	0.000940608	1.32174e-07	0.0003134
6460	26	2.34796e-07	0.000661683	7.79457e-08	0.00021966	1.01435e-06	0.00238754	3.33296e-07	0.000784498	-0.000126767	-0.404118	-4.25951e-05	-0.135788	1.63953e-06	0.00404973	5.34327e-07	0.00131982	1.10106e-06	0.00274618	3.57755e-07	0.000892282	3.92155e-07	0.000944556	1.30662e-07	0.000314716
6470	26	2.41604e-07	0.00066409	8.02059e-08	0.000220459	1.00967e-06	0.00239766	3.31757e-07	0.000787821	-0.000126659	-0.405385	-4.25587e-05	-0.136213	1.63487e-06	0.0040661	5.32807e-07	0.00132515	1.12361e-06	0.00275731	3.65081e-07	0.000895899	3.94904e-07	0.000948499	1.31578e-07	0.00031603
6480	26	2.32336e-07	0.000666448	7.7129e-08	0.000221242	9.98035e-07	0.00240768	3.27934e-07	0.000791115	-0.000126556	-0.406651	-4.25241e-05	-0.136639	1.65195e-06	0.00408253	5.38376e-07	0.00133051	1.13934e-06	0.00276864	3.70191e-07	0.000899581	3.88237e-07	0.000952435	1.29356e-07	0.000317341
6490	26	2.34685e-07	0.000668801	7.79088e-08	0.000222023	9.86535e-07	0.00241762	3.24156e-07	0.00079438	-0.000126448	-0.407916	-4.24877e-05	-0.137064	1.67523e-06	0.00409917	5.45962e-07	0.00133593	1.15126e-06	0.00278008	3.74065e-07	0.000903297	3.94413e-07	0.000956354	1.31414e-07	0.000318647
6500	26	2.29342e-07	0.000671117	7.6135e-08	0.000222792	9.95046e-07	0.00242749	3.26952e-07	0.000797625	-0.000126326	-0.40918	-4.24469e-05	-0.137489	1.6854e-06	0.00411598	5.49277e-07	0.00134141	1.17069e-06	0.0027917	3.80378e-07	0.000907073	3.98739e-07	0.000960315	1.32856e-07	0.000319966
6510	26	2.29034e-07	0.000673417	7.6033e-08	0.000223556	1.01073e-06	0.00243753	3.32106e-07	0.000800922	-0.000126217	-0.410442	-4.24102e-05	-0.137913	1.68847e-06	0.00413285	5.50278e-07	0.00134691	1.16817e-06	0.00280339	3.79559e-07	0.000910873	4.07087e-07	0.000964356	1.35637e-07	0.000321313
6520	26	2.13861e-07	0.000675619	7.09961e-08	0.000224287	1.01338e-06	0.00244765	3.32975e-07	0.000804248	-0.000126099	-0.411704	-4.23706e-05	-0.138337	1.68963e-06	0.00414973	5.50656e-07	0.00135241	1.17439e-06	0.0028151	3.81582e-07	0.000914677	4.12407e-07	0.000968437	1.37409e-07	0.000322672
6530	26	2.23247e-07	0.0006778	7.41117e-08	0.000225011	1.02152e-06	0.00245783	3.3565e-07	0.000807593	-0.000125976	-0.412964	-4.23291e-05	-0.13876	1.70582e-06	0.00416671	5.55932e-07	0.00135794	1.17296e-06	0.00282685	3.81116e-07	0.000918495	4.15315e-07	0.000972592	1.38378e-07	0.000324057
6540	26	2.13403e-07	0.000679976	7.08438e-08	0.000225733	1.01725e-06	0.00246802	3.34247e-07	0.000810942	-0.000125856	-0.414223	-4.22889e-05	-0.139183	1.68313e-06	0.00418366	5.48536e-07	0.00136347	1.16312e-06	0.00283854	3.77917e-07	0.000922291	4.15044e-07	0.000976741	1.38288e-07	0.000325439
6550	26	2.16079e-07	0.000682123	7.17322e-08	0.000226446	1.02782e-06	0.00247824	3.37721e-07	0.0008143	-0.000125745	-0.415481	-4.22517e-05	-0.139606	1.68028e-06	0.00420045	5.47608e-07	0.00136894	1.14553e-06	0.00285008	3.72202e-07	0.000926043	4.02784e-07	0.000980848	1.34203e-07	0.000326808
6560	26	2.06766e-07	0.000684241	6.86406e-08	0.000227149	1.03502e-06	0.00248855	3.40086e-07	0.000817689	-0.000125628	-0.416738	-4.22123e-05	-0.140028	1.68712e-06	0.0042173	5.49838e-07	0.00137443	1.14948e-06	0.00286156	3.73487e-07	0.000929771	3.91517e-07	0.000984792	1.30449e-07	0.000328122
6570	26	2.03419e-07	0.00068629	6.75295e-08	0.000227829	1.03985e-06	0.00249893	3.41673e-07	0.0008211	-0.000125515	-0.417994	-4.21742e-05	-0.14045	1.68712e-06	0.00423417	5.49838e-07	0.00137993	1.15107e-06	0.00287306	3.74005e-07	0.000933509	4.01159e-07	0.000988756	1.33662e-07	0.000329443
6580	26	1.9852e-07	0.000688292	6.59031e-08	0.000228494	1.04544e-06	0.00250935	3.43511e-07	0.00082452	-0.000125416	-0.419249	-4.21411e-05	-0.140872	1.69778e-06	0.00425109	5.53311e-07	0.00138544	1.15324e-06	0.00288459	3.7471e-07	0.000937257	4.05657e-07	0.000992811	1.35161e-07	0.000330794
6590	26	2.01768e-07	0.000690296	6.69815e-08	0.000229159	1.03801e-06	0.00251977	3.41069e-07	0.000827945	-0.000125295	-0.420502	-4.21003e-05	-0.141293	1.68468e-06	0.00426802	5.49041e-07	0.00139096	1.16349e-06	0.00289617	3.7804e-07	0.000941017	3.86405e-07	0.000996764	1.28746e-07	0.000332111
6600	26	2.0116e-07	0.000692292	6.67796e-08	0.000229822	1.03405e-06	0.00253012	3.39768e-07	0.000831347	-0.000125177	-0.421755	-4.20608e-05	-0.141714	1.66891e-06	0.00428479	5.43903e-07	0.00139642	1.17033e-06	0.00290783	3.80261e-07	0.000944808	3.83393e-07	0.00100062	1.27742e-07	0.000333395
6610	26	2.10558e-07	0.000694331	6.98993e-08	0.000230499	1.02389e-06	0.00254039	3.36429e-07	0.000834721	-0.000125078	-0.423006	-4.20276e-05	-0.142134	1.6729e-06	0.00430148	5.45204e-07	0.00140186	1.17769e-06	0.0029196	3.82653e-07	0.000948632	3.88988e-07	0.00100448	1.29607e-07	0.000334683
6620	26	2.08326e-07	0.000696425	6.91583e-08	0.000231194	1.03892e-06	0.0025507	3.41368e-07	0.000838109	-0.000124972	-0.424256	-4.19918e-05	-0.142554	1.68034e-06	0.00431825	5.47627e-07	0.00140733	1.16467e-06	0.00293131	3.78422e-07	0.000952435	3.99222e-07	0.00100841	1.33016e-07	0.000335992
6630	26	2.00194e-07	0.000698469	6.64589e-08	0.000231872	1.04957e-06	0.00256115	3.44867e-07	0.000841543	-0.00012487	-0.425505	-4.19577e-05	-0.142974	1.67726e-06	0.00433504	5.46623e-07	0.0014128	1.17248e-06	0.00294299	3.80961e-07	0.00095623	4.07129e-07	0.00101246	1.35651e-07	0.00033734
6640	26	2.0353e-07	0.000700485	6.75663e-08	0.000232542	1.04119e-06	0.00257161	3.42114e-07	0.000844981	-0.000124763	-0.426753	-4.19215e-05	-0.143394	1.67607e-06	0.0043518	5.46236e-07	0.00141826	1.15795e-06	0.00295465	3.76237e-07	0.000960018	4.0462e-07	0.0010165	1.34815e-07	0.000338687
6650	26	2.02143e-07	0.000702506	6.7106e-08	0.000233213	1.03072e-06	0.00258198	3.38673e-07	0.000848388	-0.000124633	-0.428	-4.18779e-05	-0.143813	1.68096e-06	0.00436861	5.47829e-07	0.00142374	1.15025e-06	0.00296618	3.73737e-07	0.000963766	3.98841e-07	0.00102052	1.32889e-07	0.000340027
6660	26	2.15763e-07	0.000704594	7.16273e-08	0.000233906	1.02326e-06	0.00259225	3.36222e-07	0.000851762	-0.000124528	-0.429246	-4.18428e-05	-0.144231	1.67311e-06	0.00438539	5.45272e-07	0.00142921	1.15979e-06	0.00297773	3.76837e-07	0.00096752	3.9895e-07	0.00102451	1.32926e-07	0.000341354
6670	26	2.18749e-07	0.000706771	7.26185e-08	0.000234628	1.02064e-06	0.00260246	3.35363e-07	0.000855116	-0.000124415	-0.430491	-4.18048e-05	-0.144649	1.67522e-06	0.00440212	5.4596e-07	0.00143466	1.1695e-06	0.00298939	3.7999e-07	0.000971306	4.05218e-07	0.00102852	1.35014e-07	0.000342691
6680	26	2.2662e-07	0.000708989	7.52314e-08	0.000235365	1.03308e-06	0.00261273	3.39448e-07	0.000858492	-0.000124318	-0.431735	-4.17722e-05	-0.145067	1.68962e-06	0.00441894	5.50651e-07	0.00144014	1.16856e-06	0.00300107	3.79687e-07	0.000975101	3.97153e-07	0.00103252	1.32327e-07	0.000344026
6690	26	2.37749e-07	0.000711292	7.8926e-08	0.000236129	1.02984e-06	0.00262305	3.38384e-07	0.000861883	-0.000124224	-0.432977	-4.17405e-05	-0.145485	1.68648e-06	0.00443583	5.49629e-07	0.00144565	1.16285e-06	0.00301273	3.7783e-07	0.000978892	4.06735e-07	0.00103653	1.3552e-07	0.00034536
6700	26	2.43051e-07	0.000713718	8.06863e-08	0.000236935	1.04647e-06	0.00263344	3.4385e-07	0.000865294	-0.000124124	-0.434219	-4.17068e-05	-0.145902	1.69066e-06	0.00445271	5.5099e-07	0.00145115	1.15132e-06	0.00302431	3.74083e-07	0.000982654	4.01066e-07	0.00104058	1.33631e-07	0.000346711
6710	26	2.42021e-07	0.000716143	8.03442e-08	0.00023774	1.04818e-06	0.00264392	3.44412e-07	0.000868738	-0.000124012	-0.43546	-4.16694e-05	-0.146319	1.69527e-06	0.00446964	5.52492e-07	0.00145667	1.1403e-06	0.00303577	3.70503e-07	0.000986375	4.05604e-07	0.00104462	1.35143e-07	0.000348057
6720	26	2.53517e-07	0.000718627	8.41607e-08	0.000238564	1.04509e-06	0.00265437	3.43395e-07	0.000872173	-0.000123899	-0.436699	-4.16312e-05	-0.146735	1.71726e-06	0.00448669	5.5966e-07	0.00146222	1.14093e-06	0.00304718	3.70708e-07	0.000990083	4.16451e-07	0.00104875	1.38757e-07	0.000349432
6730	26	2.48364e-07	0.000721127	8.24501e-08	0.000239394	1.05876e-06	0.00266489	3.47886e-07	0.000875631	-0.000123793	-0.437938	-4.15957e-05	-0.147152	1.72454e-06	0.00450394	5.62032e-07	0.00146785	1.146e-06	0.00305864	3.72355e-07	0.000993806	4.19266e-07	0.00105294	1.39695e-07	0.000350827
6740	26	2.40119e-07	0.000723558	7.97128e-08	0.000240201	1.06112e-06	0.00267547	3.48662e-07	0.000879107	-0.000123677	-0.439175	-4.15567e-05	-0.147567	1.70181e-06	0.00452104	5.54625e-07	0.00147342	1.14276e-06	0.00307007	3.71303e-07	0.000997522	4.17145e-07	0.00105716	1.38988e-07	0.000352233
6750	26	2.57052e-07	0.000726034	8.53341e-08	0.000241023	1.05679e-06	0.00268605	3.4724e-07	0.000882583	-0.000123572	-0.440411	-4.15215e-05	-0.147983	1.71588e-06	0.00453811	5.59208e-07	0.00147898	1.17179e-06	0.00308159	3.80735e-07	0.00100126	4.06723e-07	0.00106129	1.35516e-07	0.000353609
6760	26	2.51921e-07	0.000728594	8.36309e-08	0.000241873	1.04591e-06	0.00269657	3.43664e-07	0.00088604	-0.000123476	-0.441647	-4.14892e-05	-0.148398	1.71476e-06	0.00455524	5.58843e-07	0.00148457	1.18874e-06	0.00309342	3.86244e-07	0.00100511	4.06764e-07	0.00106535	1.35529e-07	0.000354962
6770	26	2.45937e-07	0.000731079	8.16444e-08	0.000242698	1.04628e-06	0.00270701	3.43788e-07	0.000889468	-0.000123363	-0.442881	-4.14512e-05	-0.148812	1.70849e-06	0.00457237	5.56801e-07	0.00149015	1.18053e-06	0.00310528	3.83576e-07	0.00100896	4.20118e-07	0.00106947	1.39979e-07	0.000356336
6780	26	2.56103e-07	0.000733576	8.50191e-08	0.000243527	1.05955e-06	0.00271755	3.48146e-07	0.000892933	-0.000123254	-0.444114	-4.14146e-05	-0.149227	1.71319e-06	0.00458947	5.58334e-07	0.00149572	1.1741e-06	0.00311706	3.81486e-07	0.00101279	4.32391e-07	0.00107374	1.44068e-07	0.000357758
6790	26	2.67044e-07	0.000736194	8.86512e-08	0.000244396	1.06814e-06	0.00272817	3.5097e-07	0.000896423	-0.00012314	-0.445346	-4.13764e-05	-0.149641	1.71082e-06	0.0046066	5.5756e-07	0.0015013	1.16602e-06	0.00312875	3.78861e-07	0.00101659	4.3732e-07	0.00107809	1.4571e-07	0.000359207
6800	26	2.63245e-07	0.000738853	8.73901e-08	0.000245279	1.08455e-06	0.00273895	3.56362e-07	0.000899962	-0.000123029	-0.446577	-4.13389e-05	-0.150054	1.70089e-06	0.00462365	5.54325e-07	0.00150686	1.17544e-06	0.00314044	3.81923e-07	0.00102039	4.33714e-07	0.00108245	1.44509e-07	0.00036066
6810	26	2.63254e-07	0.000741494	8.73929e-08	0.000246155	1.07175e-06	0.00274977	3.52155e-07	0.000903518	-0.000122932	-0.447806	-4.13065e-05	-0.150468	1.71168e-06	0.0046407	5.57841e-07	0.00151242	1.19525e-06	0.0031523	3.88358e-07	0.00102424	4.36754e-07	0.00108679	1.45521e-07	0.000362108
6820	26	2.68669e-07	0.000744156	8.91905e-08	0.000247039	1.07312e-06	0.00276049	3.52606e-07	0.000907041	-0.000122834	-0.449035	-4.12734e-05	-0.15088	1.70651e-06	0.00465779	5.56155e-07	0.00151799	1.18909e-06	0.00316421	3.86357e-07	0.00102811	4.5205e-07	0.00109123	1.50618e-07	0.000363587
6830	26	2.72531e-07	0.000746875	9.04726e-08	0.000247942	1.06799e-06	0.00277119	3.50921e-07	0.000910558	-0.000122724	-0.450263	-4.12364e-05	-0.151293	1.7181e-06	0.00467492	5.59933e-07	0.00152357	1.171e-06	0.003176	3.8048e-07	0.00103194	4.48928e-07	0.00109573	1.49578e-07	0.000365086
6840	26	2.68488e-07	0.00074957	8.91307e-08	0.000248837	1.06292e-06	0.00278185	3.49254e-07	0.00091406	-0.000122625	-0.45149	-4.12034e-05	-0.151705	1.72001e-06	0.00469212	5.60556e-07	0.00152917	1.16586e-06	0.00318768	3.78808e-07	0.00103573	4.49528e-07	0.00110023	1.49778e-07	0.000366586
6850	26	2.84114e-07	0.000752329	9.4318e-08	0.000249752	1.05205e-06	0.00279242	3.45682e-07	0.000917534	-0.000122514	-0.452716	-4.11658e-05	-0.152117	1.722e-06	0.00470933	5.61205e-07	0.00153479	1.1671e-06	0.00319934	3.79212e-07	0.00103952	4.43489e-07	0.00110469	1.47766e-07	0.000368071
6860	26	2.89512e-07	0.000755213	9.611e-08	0.00025071	1.04306e-06	0.00280289	3.42727e-07	0.000920973	-0.000122415	-0.45394	-4.11326e-05	-0.152529	1.70293e-06	0.00472647	5.54988e-07	0.00154037	1.16878e-06	0.00321102	3.79759e-07	0.00104332	4.29486e-07	0.00110906	1.431e-07	0.000369528
6870	26	2.83067e-07	0.000758076	9.39703e-08	0.00025166	1.04663e-06	0.00281334	3.43903e-07	0.000924408	-0.000122317	-0.455164	-4.10997e-05	-0.15294	1.69747e-06	0.00474345	5.53209e-07	0.0015459	1.18147e-06	0.00322277	3.8388e-07	0.00104714	4.24611e-07	0.00111333	1.41476e-07	0.000370948
6880	26	2.67198e-07	0.000760824	8.87023e-08	0.000252573	1.05091e-06	0.00282382	3.45309e-07	0.000927852	-0.000122209	-0.456386	-4.10636e-05	-0.153351	1.69432e-06	0.00476043	5.52184e-07	0.00155144	1.1732e-06	0.00323455	3.81192e-07	0.00105096	4.24085e-07	0.00111757	1.413e-07	0.000372361
6890	26	2.60879e-07	0.000763457	8.66045e-08	0.000253446	1.06226e-06	0.0028344	3.49037e-07	0.000931328	-0.00012211	-0.457608	-4.10303e-05	-0.153761	1.69067e-06	0.00477735	5.50993e-07	0.00155695	1.1776e-06	0.0032463	3.82624e-07	0.00105478	4.21547e-07	0.00112177	1.40455e-07	0.000373762
6900	26	2.68579e-07	0.000766103	8.91608e-08	0.000254325	1.06239e-06	0.00284502	3.49081e-07	0.000934816	-0.000122022	-0.458829	-4.10008e-05	-0.154171	1.70343e-06	0.00479429	5.55153e-07	0.00156247	1.18687e-06	0.00325813	3.85635e-07	0.00105863	4.06275e-07	0.00112592	1.35366e-07	0.000375145
6910	26	2.59433e-07	0.000768756	8.61247e-08	0.000255206	1.0532e-06	0.00285559	3.46061e-07	0.00093829	-0.00012191	-0.460048	-4.09629e-05	-0.154581	1.70115e-06	0.00481132	5.54408e-07	0.00156802	1.18902e-06	0.00327001	3.86335e-07	0.00106249	3.95198e-07	0.00112991	1.31676e-07	0.000376474
6920	26	2.53931e-07	0.000771324	8.42982e-08	0.000256058	1.06243e-06	0.00286617	3.49094e-07	0.000941765	-0.000121789	-0.461267	-4.09224e-05	-0.15499	1.69061e-06	0.00482827	5.50976e-07	0.00157355	1.19171e-06	0.00328192	3.87208e-07	0.00106636	3.8933e-07	0.00113384	1.2972e-07	0.000377782
6930	26	2.50944e-07	0.000773832	8.33066e-08	0.000256891	1.0647e-06	0.00287681	3.49839e-07	0.000945263	-0.000121674	-0.462484	-4.08838e-05	-0.155399	1.70078e-06	0.00484521	5.54288e-07	0.00157907	1.18518e-06	0.00329381	3.85085e-07	0.00107022	3.88801e-07	0.00113772	1.29544e-07	0.000379075
6940	26	2.64626e-07	0.000776408	8.78484e-08	0.000257746	1.05462e-06	0.00288741	3.46527e-07	0.000948745	-0.00012157	-0.4637	-4.08486e-05	-0.155808	1.70206e-06	0.00486224	5.54707e-07	0.00158462	1.1718e-06	0.00330559	3.80739e-07	0.00107405	3.74833e-07	0.00114155	1.2489e-07	0.000380351
6950	26	2.63487e-07	0.000779047	8.74704e-08	0.000258622	1.03799e-06	0.00289788	3.41063e-07	0.000952185	-0.000121476	-0.464916	-4.08171e-05	-0.156216	1.68081e-06	0.00487916	5.4778e-07	0.00159013	1.16135e-06	0.00331725	3.77342e-07	0.00107783	3.66917e-07	0.00114523	1.22253e-07	0.000381578
6960	26	2.47039e-07	0.000781629	8.20103e-08	0.000259479	1.0241e-06	0.00290819	3.36498e-07	0.000955572	-0.000121373	-0.46613	-4.07825e-05	-0.156624	1.66794e-06	0.0048959	5.43586e-07	0.00159559	1.15004e-06	0.00332882	3.73669e-07	0.00108159	3.62114e-07	0.0011489	1.20652e-07	0.000382801
6970	26	2.4283e-07	0.000784068	8.06128e-08	0.000260289	1.02802e-06	0.00291845	3.37786e-07	0.000958945	-0.000121274	-0.467343	-4.07492e-05	-0.157032	1.65508e-06	0.00491253	5.39396e-07	0.00160101	1.142e-06	0.00334027	3.71055e-07	0.00108531	3.68104e-07	0.00115255	1.22648e-07	0.000384017
6980	26	2.4753e-07	0.000786543	8.21732e-08	0.00026111	1.03574e-06	0.00292878	3.40324e-07	0.000962338	-0.000121152	-0.468555	-4.07083e-05	-0.157439	1.64406e-06	0.00492901	5.35803e-07	0.00160638	1.15125e-06	0.00335171	3.74062e-07	0.00108903	3.63076e-07	0.00115622	1.20973e-07	0.000385239
6990	26	2.37678e-07	0.000788944	7.89026e-08	0.000261907	1.04459e-06	0.00293917	3.43232e-07	0.000965752	-0.000121051	-0.469766	-4.06744e-05	-0.157846	1.65538e-06	0.0049455	5.39492e-07	0.00161175	1.16667e-06	0.00336332	3.79073e-07	0.0010928	3.55076e-07	0.00115979	1.18307e-07	0.000386431
7000	26	2.41844e-07	0.000791351	8.02855e-08	0.000262706	1.0452e-06	0.00294964	3.43431e-07	0.000969192	-0.000120937	-0.470976	-4.06362e-05	-0.158253	1.66006e-06	0.00496209	5.41018e-07	0.00161716	1.16593e-06	0.00337499	3.7883e-07	0.00109659	3.51723e-07	0.00116334	1.1719e-07	0.000387613
7010	26	2.50209e-07	0.000793821	8.30625e-08	0.000263527	1.05028e-06	0.00296012	3.45099e-07	0.000972637	-0.000120817	-0.472185	-4.05959e-05	-0.158659	1.66173e-06	0.00497872	5.41562e-07	0.00162258	1.17409e-06	0.00338668	3.81482e-07	0.00110039	3.41971e-07	0.00116679	1.13941e-07	0.000388762
7020	26	2.45198e-07	0.000796298	8.13989e-08	0.000264349	1.04151e-06	0.00297058	3.42218e-07	0.000976074	-0.000120679	-0.473392	-4.05495e-05	-0.159065	1.64118e-06	0.00499523	5.34865e-07	0.00162796	1.17296e-06	0.00339842	3.81115e-07	0.00110421	3.41505e-07	0.0011702	1.13786e-07	0.000389899
7030	26	2.40811e-07	0.00079873	7.99425e-08	0.000265156	1.03903e-06	0.00298098	3.41406e-07	0.00097949	-0.00012054	-0.474599	-4.05027e-05	-0.15947	1.6526e-06	0.00501168	5.38588e-07	0.00163332	1.16731e-06	0.00341012	3.7928e-07	0.00110801	3.44539e-07	0.00117364	1.14797e-07	0.000391045
7040	26	2.42422e-07	0.000801144	8.04773e-08	0.000265958	1.04576e-06	0.00299139	3.43615e-07	0.000982909	-0.000120418	-0.475803	-4.04616e-05	-0.159875	1.64121e-06	0.00502817	5.34873e-07	0.00163869	1.14191e-06	0.00342168	3.71026e-07	0.00111176	3.57174e-07	0.00117712	1.19007e-07	0.000392203
7050	26	2.53278e-07	0.000803614	8.40813e-08	0.000266778	1.06065e-06	0.00300192	3.48507e-07	0.000986371	-0.000120303	-0.477007	-4.04231e-05	-0.160279	1.64453e-06	0.00504459	5.35956e-07	0.00164404	1.14517e-06	0.00343308	3.72086e-07	0.00111547	3.6769e-07	0.00118076	1.2251e-07	0.000393416
7060	26	2.65275e-07	0.000806201	8.80638e-08	0.000267636	1.05438e-06	0.00301251	3.46448e-07	0.000989851	-0.00012019	-0.478209	-4.0385e-05	-0.160683	1.63457e-06	0.00506098	5.32709e-07	0.00164939	1.14062e-06	0.00344451	3.70607e-07	0.00111918	3.70247e-07	0.00118445	1.23362e-07	0.000394645
7070	26	2.78407e-07	0.000808939	9.24235e-08	0.000268545	1.04987e-06	0.00302303	3.44965e-07	0.000993306	-0.000120074	-0.479411	-4.03459e-05	-0.161087	1.65012e-06	0.00507742	5.37777e-07	0.00165474	1.13582e-06	0.00345589	3.69047e-07	0.00112288	3.8153e-07	0.00118821	1.27122e-07	0.000395899
7080	26	2.81723e-07	0.000811746	9.35241e-08	0.000269477	1.04624e-06	0.00303351	3.43772e-07	0.00099675	-0.000119951	-0.480611	-4.03049e-05	-0.16149	1.65078e-06	0.00509393	5.37993e-07	0.00166013	1.14819e-06	0.00346731	3.73069e-07	0.00112659	3.74921e-07	0.001192	1.24919e-07	0.00039716
7090	26	2.78848e-07	0.000814545	9.25698e-08	0.000270406	1.03842e-06	0.00304394	3.41203e-07	0.00100018	-0.000119833	-0.48181	-4.02652e-05	-0.161893	1.66444e-06	0.00511048	5.42446e-07	0.00166552	1.14497e-06	0.00347879	3.7202e-07	0.00113032	3.79748e-07	0.00119576	1.26528e-07	0.000398413
7100	26	2.80059e-07	0.000817335	9.29717e-08	0.000271333	1.04513e-06	0.00305434	3.4341e-07	0.00100359	-0.000119725	-0.483008	-4.02288e-05	-0.162295	1.66159e-06	0.00512712	5.41516e-07	0.00167094	1.1409e-06	0.00349022	3.70699e-07	0.00113404	3.90507e-07	0.00119961	1.30112e-07	0.000399697
7110	26	2.80754e-07	0.000820128	9.32026e-08	0.00027226	1.06231e-06	0.00306488	3.49052e-07	0.00100706	-0.000119614	-0.484204	-4.01916e-05	-0.162698	1.65123e-06	0.0051437	5.38141e-07	0.00167635	1.13608e-06	0.00350159	3.69133e-07	0.00113773	4.05752e-07	0.0012036	1.35192e-07	0.000401025
7120	26	2.8545e-07	0.000822961	9.47613e-08	0.0002732	1.06379e-06	0.00307553	3.49541e-07	0.00101056	-0.000119502	-0.4854	-4.01538e-05	-0.163099	1.64256e-06	0.00516014	5.35315e-07	0.00168171	1.13489e-06	0.00351296	3.68747e-07	0.00114142	4.01765e-07	0.00120765	1.33864e-07	0.000402374
7130	26	2.76339e-07	0.000825789	9.1737e-08	0.000274139	1.05159e-06	0.00308609	3.45531e-07	0.00101403	-0.000119388	-0.486594	-4.01156e-05	-0.163501	1.65098e-06	0.00517663	5.38059e-07	0.00168708	1.12803e-06	0.00352427	3.66516e-07	0.0011451	3.9395e-07	0.00121163	1.3126e-07	0.000403702
7140	26	2.50192e-07	0.00082842	8.30568e-08	0.000275012	1.0653e-06	0.00309667	3.50037e-07	0.0010175	-0.000119273	-0.487788	-4.0077e-05	-0.163902	1.65786e-06	0.00519317	5.403e-07	0.00169247	1.12283e-06	0.00353553	3.64828e-07	0.00114876	3.80499e-07	0.00121548	1.26778e-07	0.000404985
7150	26	2.51882e-07	0.000830909	8.36178e-08	0.000275839	1.0715e-06	0.00310736	3.52073e-07	0.00102102	-0.000119177	-0.48898	-4.00446e-05	-0.164302	1.658e-06	0.00520975	5.40345e-07	0.00169787	1.11697e-06	0.00354672	3.62924e-07	0.00115239	3.80508e-07	0.0012193	1.26781e-07	0.000406256
7160	26	2.57456e-07	0.000833474	8.54682e-08	0.00027669	1.06588e-06	0.00311806	3.50227e-07	0.00102453	-0.00011908	-0.490171	-4.00119e-05	-0.164703	1.65787e-06	0.00522633	5.40304e-07	0.00170327	1.12045e-06	0.0035579	3.64055e-07	0.00115603	3.91503e-07	0.00122315	1.30445e-07	0.000407539
7170	26	2.59104e-07	0.000836064	8.60154e-08	0.00027755	1.06349e-06	0.00312869	3.49441e-07	0.00102803	-0.000118977	-0.491361	-3.99775e-05	-0.165102	1.66741e-06	0.00524296	5.43413e-07	0.00170869	1.107e-06	0.00356905	3.59683e-07	0.00115965	3.77286e-07	0.00122702	1.25707e-07	0.00040883
7180	26	2.57596e-07	0.000838653	8.55146e-08	0.00027841	1.06964e-06	0.00313935	3.51462e-07	0.00103153	-0.000118865	-0.492551	-3.99398e-05	-0.165502	1.67082e-06	0.00525965	5.44524e-07	0.00171413	1.1019e-06	0.0035801	3.58028e-07	0.00116324	3.73486e-07	0.00123078	1.24441e-07	0.000410084
7190	26	2.53833e-07	0.000841196	8.42654e-08	0.000279254	1.06872e-06	0.00315007	3.5116e-07	0.00103505	-0.000118765	-0.493739	-3.99063e-05	-0.165901	1.67309e-06	0.00527638	5.45264e-07	0.00171959	1.10037e-06	0.0035911	3.57531e-07	0.00116681	3.65267e-07	0.00123446	1.21703e-07	0.000411309
7200	26	2.54251e-07	0.000843739	8.44043e-08	0.000280098	1.07399e-06	0.00316078	3.52892e-07	0.00103857	-0.000118676	-0.494926	-3.98762e-05	-0.1663	1.66563e-06	0.00529307	5.42834e-07	0.00172502	1.11231e-06	0.00360216	3.6141e-07	0.00117041	3.64167e-07	0.00123811	1.21336e-07	0.000412525
7210	26	2.70485e-07	0.000846345	8.97934e-08	0.000280963	1.09137e-06	0.0031716	3.58604e-07	0.00104212	-0.000118573	-0.496112	-3.98419e-05	-0.166699	1.67405e-06	0.00530973	5.45577e-07	0.00173046	1.11167e-06	0.00361328	3.61202e-07	0.00117402	3.51966e-07	0.0012417	1.17271e-07	0.00041372
7220	26	2.62248e-07	0.000849006	8.70591e-08	0.000281846	1.09025e-06	0.0031825	3.58233e-07	0.0010457	-0.000118475	-0.497297	-3.9809e-05	-0.167097	1.68508e-06	0.00532655	5.49172e-07	0.00173594	1.12358e-06	0.00362445	3.65072e-07	0.00117765	3.50151e-07	0.0012452	1.16667e-07	0.000414885
7230	26	2.689e-07	0.000851646	8.92674e-08	0.000282723	1.10399e-06	0.00319348	3.62748e-07	0.00104931	-0.00011836	-0.498482	-3.97703e-05	-0.167495	1.69235e-06	0.00534343	5.51542e-07	0.00174144	1.13416e-06	0.00363574	3.68508e-07	0.00118132	3.5908e-07	0.00124873	1.19641e-07	0.000416062
7240	26	2.67625e-07	0.000854351	8.88442e-08	0.000283621	1.10271e-06	0.00320451	3.62329e-07	0.00105294	-0.000118258	-0.499665	-3.97359e-05	-0.167892	1.69393e-06	0.00536036	5.52055e-07	0.00174696	1.13892e-06	0.0036471	3.70056e-07	0.00118501	3.75604e-07	0.00125241	1.25147e-07	0.00041729
7250	26	2.64845e-07	0.000857012	8.79212e-08	0.000284504	1.09863e-06	0.00321552	3.60989e-07	0.00105656	-0.000118163	-0.500847	-3.97039e-05	-0.16829	1.70996e-06	0.00537737	5.57282e-07	0.0017525	1.13661e-06	0.0036585	3.69306e-07	0.00118871	3.78621e-07	0.00125619	1.26152e-07	0.000418547
7260	26	2.83759e-07	0.000859784	9.42002e-08	0.000285424	1.09761e-06	0.00322652	3.60652e-07	0.00106017	-0.00011807	-0.502028	-3.96729e-05	-0.168687	1.71055e-06	0.00539446	5.57474e-07	0.00175807	1.13902e-06	0.00366987	3.70087e-07	0.00119241	3.82772e-07	0.00125999	1.27535e-07	0.000419815
7270	26	2.74971e-07	0.000862586	9.12828e-08	0.000286355	1.09221e-06	0.00323746	3.58879e-07	0.00106377	-0.000117963	-0.503208	-3.96368e-05	-0.169083	1.70972e-06	0.00541157	5.57204e-07	0.00176365	1.14235e-06	0.00368128	3.71169e-07	0.00119611	3.91281e-07	0.00126386	1.30371e-07	0.000421103
7280	26	2.70677e-07	0.000865305	8.98574e-08	0.000287257	1.10522e-06	0.00324844	3.63153e-07	0.00106737	-0.000117862	-0.504387	-3.9603e-05	-0.169479	1.70175e-06	0.00542862	5.54604e-07	0.0017692	1.14533e-06	0.00369272	3.72139e-07	0.00119983	3.8734e-07	0.00126778	1.29057e-07	0.000422409
7290	26	2.69594e-07	0.000868031	8.94977e-08	0.000288162	1.10029e-06	0.00325948	3.61534e-07	0.001071	-0.000117752	-0.505565	-3.95659e-05	-0.169875	1.70031e-06	0.00544564	5.54136e-07	0.00177475	1.14608e-06	0.00370418	3.72382e-07	0.00120356	3.63968e-07	0.00127154	1.2127e-07	0.000423662
7300	26	2.55092e-07	0.000870643	8.46835e-08	0.000289029	1.08748e-06	0.00327042	3.57324e-07	0.00107459	-0.000117644	-0.506742	-3.95296e-05	-0.170271	1.69242e-06	0.00546259	5.51564e-07	0.00178027	1.15255e-06	0.00371567	3.74485e-07	0.00120729	3.90972e-07	0.00127529	1.30268e-07	0.000424913
7310	26	2.54777e-07	0.000873191	8.45788e-08	0.000289875	1.08424e-06	0.00328128	3.56259e-07	0.00107816	-0.000117552	-0.507918	-3.94987e-05	-0.170666	1.70805e-06	0.00547961	5.56659e-07	0.00178582	1.14601e-06	0.00372717	3.7236e-07	0.00121102	3.80141e-07	0.00127916	1.26659e-07	0.000426203
7320	26	2.56602e-07	0.000875752	8.51847e-08	0.000290725	1.0767e-06	0.00329208	3.53782e-07	0.00108171	-0.000117467	-0.509093	-3.94702e-05	-0.171061	1.70245e-06	0.00549667	5.54834e-07	0.00179138	1.13716e-06	0.00373859	3.69485e-07	0.00121473	3.76743e-07	0.00128294	1.25526e-07	0.000427462
7330	26	2.59903e-07	0.000878317	8.62805e-08	0.000291577	1.0705e-06	0.00330281	3.51746e-07	0.00108524	-0.000117386	-0.510268	-3.94429e-05	-0.171455	1.68482e-06	0.00551362	5.49086e-07	0.0017969	1.12709e-06	0.0037499	3.66213e-07	0.00121841	3.91342e-07	0.00128676	1.30391e-07	0.000428733
7340	26	2.65919e-07	0.000880958	8.82778e-08	0.000292454	1.07056e-06	0.00331354	3.51765e-07	0.00108876	-0.000117301	-0.511441	-3.94145e-05	-0.171849	1.67013e-06	0.00553036	5.443e-07	0.00180236	1.12864e-06	0.00376119	3.66716e-07	0.00122208	3.7741e-07	0.00129062	1.25749e-07	0.000430021
7350	26	2.62311e-07	0.000883606	8.708e-08	0.000293333	1.07812e-06	0.00332428	3.54247e-07	0.00109229	-0.000117209	-0.512614	-3.93833e-05	-0.172243	1.68413e-06	0.00554714	5.48864e-07	0.00180783	1.13611e-06	0.0037725	3.69143e-07	0.00122575	3.84169e-07	0.0012944	1.28001e-07	0.000431278
7360	26	2.68732e-07	0.00088624	8.92117e-08	0.000294207	1.09102e-06	0.00333513	3.58488e-07	0.00109586	-0.000117124	-0.513785	-3.93549e-05	-0.172637	1.6913e-06	0.00556402	5.512e-07	0.00181333	1.13635e-06	0.00378388	3.6922e-07	0.00122945	3.99831e-07	0.00129833	1.33219e-07	0.000432589
7370	26	2.77608e-07	0.000888978	9.21583e-08	0.000295116	1.08614e-06	0.00334603	3.56883e-07	0.00109944	-0.00011703	-0.514956	-3.93233e-05	-0.173031	1.69345e-06	0.00558095	5.51901e-07	0.00181885	1.14124e-06	0.00379525	3.70809e-07	0.00123315	3.99282e-07	0.00130234	1.33036e-07	0.000433927
7380	26	2.77906e-07	0.000891765	9.2257e-08	0.000296041	1.08972e-06	0.00335689	3.58059e-07	0.00110301	-0.000116938	-0.516126	-3.92924e-05	-0.173424	1.68465e-06	0.00559783	5.49033e-07	0.00182435	1.13918e-06	0.00380668	3.70139e-07	0.00123686	3.83512e-07	0.00130624	1.27782e-07	0.000435224
7390	26	2.71377e-07	0.000894507	9.00896e-08	0.000296951	1.09196e-06	0.0033678	3.58796e-07	0.00110659	-0.000116836	-0.517295	-3.92581e-05	-0.173816	1.68752e-06	0.00561469	5.49968e-07	0.00182984	1.12636e-06	0.00381801	3.65975e-07	0.00124054	3.69367e-07	0.00131002	1.23069e-07	0.000436483
7400	26	2.62456e-07	0.000897191	8.71283e-08	0.000297842	1.09171e-06	0.00337871	3.58713e-07	0.00111018	-0.000116742	-0.518463	-3.92265e-05	-0.174209	1.68499e-06	0.00563158	5.49142e-07	0.00183535	1.12083e-06	0.00382922	3.64179e-07	0.00124418	3.56878e-07	0.00131363	1.18908e-07	0.000437687
7410	26	2.5823e-07	0.000899782	8.57252e-08	0.000298702	1.09855e-06	0.00338968	3.60961e-07	0.00111378	-0.000116659	-0.51963	-3.91986e-05	-0.174601	1.67386e-06	0.00564836	5.45516e-07	0.00184082	1.12339e-06	0.00384044	3.65009e-07	0.00124783	3.79689e-07	0.00131731	1.26508e-07	0.000438912
7420	26	2.69683e-07	0.000902424	8.95272e-08	0.00029958	1.09589e-06	0.00340066	3.60089e-07	0.00111739	-0.000116568	-0.520796	-3.91681e-05	-0.174993	1.67896e-06	0.00566511	5.47178e-07	0.00184627	1.11536e-06	0.00385166	3.62402e-07	0.00125147	3.92751e-07	0.00132119	1.3086e-07	0.000440205
7430	26	2.79054e-07	0.000905159	9.26381e-08	0.000300488	1.09461e-06	0.00341159	3.59666e-07	0.00112098	-0.000116475	-0.521961	-3.91366e-05	-0.175384	1.68566e-06	0.00568193	5.4936e-07	0.00185176	1.1058e-06	0.00386276	3.59294e-07	0.00125508	3.87309e-07	0.00132509	1.29047e-07	0.000441505
7440	26	2.87027e-07	0.000907987	9.52849e-08	0.000301427	1.11119e-06	0.00342262	3.65113e-07	0.0011246	-0.000116377	-0.523125	-3.91037e-05	-0.175775	1.68837e-06	0.0056988	5.50245e-07	0.00185725	1.10202e-06	0.00387379	3.58065e-07	0.00125866	3.80474e-07	0.00132892	1.2677e-07	0.000442783
7450	26	2.91884e-07	0.000910901	9.68973e-08	0.000302394	1.11953e-06	0.00343379	3.67854e-07	0.00112827	-0.000116286	-0.524289	-3.90733e-05	-0.176166	1.69028e-06	0.0057157	5.50868e-07	0.00186276	1.10936e-06	0.00388484	3.60452e-07	0.00126225	3.81533e-07	0.00133273	1.27123e-07	0.000444051
7460	26	2.84288e-07	0.000913781	9.43758e-08	0.00030335	1.11917e-06	0.00344498	3.67737e-07	0.00113195	-0.000116201	-0.525451	-3.90448e-05	-0.176557	1.68707e-06	0.00573259	5.49822e-07	0.00186827	1.12263e-06	0.00389601	3.64764e-07	0.00126588	3.84635e-07	0.00133654	1.28156e-07	0.00044532
7470	26	2.80424e-07	0.000916599	9.3093e-08	0.000304285	1.11064e-06	0.00345614	3.64934e-07	0.00113562	-0.000116121	-0.526613	-3.90177e-05	-0.176947	1.69688e-06	0.0057495	5.53019e-07	0.00187378	1.12084e-06	0.00390723	3.64181e-07	0.00126953	3.9756e-07	0.00134046	1.32462e-07	0.000446626
7480	26	2.95637e-07	0.000919472	9.81431e-08	0.000305239	1.10837e-06	0.00346722	3.64188e-07	0.00113926	-0.000116044	-0.527773	-3.8992e-05	-0.177337	1.69612e-06	0.00576649	5.52769e-07	0.00187932	1.12432e-06	0.00391845	3.65313e-07	0.00127317	3.83796e-07	0.00134436	1.27877e-07	0.000447926
7490	26	3.03339e-07	0.000922475	1.007e-07	0.000306236	1.10381e-06	0.00347826	3.62688e-07	0.00114289	-0.000115962	-0.528933	-3.89643e-05	-0.177727	1.69304e-06	0.00578343	5.51765e-07	0.00188484	1.12832e-06	0.00392972	3.6661e-07	0.00127684	3.82833e-07	0.00134819	1.27556e-07	0.000449203
7500	26	3.00624e-07	0.000925502	9.97987e-08	0.000307241	1.11446e-06	0.00348936	3.66188e-07	0.00114653	-0.000115878	-0.530093	-3.89363e-05	-0.178117	1.69246e-06	0.00580036	5.51576e-07	0.00189035	1.12146e-06	0.00394097	3.64383e-07	0.00128049	3.82571e-07	0.00135202	1.27468e-07	0.000450477
7510	26	2.98318e-07	0.000928494	9.90331e-08	0.000308234	1.1249e-06	0.00350057	3.69621e-07	0.00115022	-0.000115784	-0.531251	-3.89045e-05	-0.178506	1.67502e-06	0.0058172	5.45894e-07	0.00189584	1.1225e-06	0.0039522	3.6472e-07	0.00128414	3.69372e-07	0.00135578	1.23071e-07	0.00045173
7520	26	2.99325e-07	0.000931483	9.93675e-08	0.000309227	1.10578e-06	0.00351173	3.63338e-07	0.00115388	-0.000115695	-0.532408	-3.88747e-05	-0.178895	1.66731e-06	0.00583388	5.43381e-07	0.00190128	1.11127e-06	0.00396338	3.6107e-07	0.00128777	3.52514e-07	0.00135939	1.17454e-07	0.000452932
7530	26	2.96049e-07	0.000934459	9.82801e-08	0.000310215	1.09689e-06	0.00352273	3.60415e-07	0.0011575	-0.000115599	-0.533565	-3.88424e-05	-0.179283	1.66126e-06	0.00585052	5.4141e-07	0.0019067	1.11311e-06	0.00397448	3.61668e-07	0.00129138	3.50805e-07	0.00136289	1.16884e-07	0.000454101
7540	26	2.99789e-07	0.000937431	9.95218e-08	0.000311201	1.1062e-06	0.00353374	3.63475e-07	0.00116111	-0.000115505	-0.53472	-3.88108e-05	-0.179671	1.64755e-06	0.00586704	5.3694e-07	0.00191209	1.10811e-06	0.0039856	3.60046e-07	0.00129499	3.46395e-07	0.00136636	1.15415e-07	0.000455255
7550	26	3.08831e-07	0.000940471	1.02523e-07	0.00031221	1.11686e-06	0.00354484	3.66977e-07	0.00116476	-0.000115427	-0.535875	-3.87846e-05	-0.180059	1.66397e-06	0.0058836	5.42291e-07	0.00191748	1.11513e-06	0.00399671	3.62327e-07	0.0012986	3.4786e-07	0.00136983	1.15903e-07	0.000456412
7560	26	2.97592e-07	0.000943531	9.87922e-08	0.000313226	1.12608e-06	0.00355608	3.70007e-07	0.00116846	-0.000115337	-0.537029	-3.87546e-05	-0.180447	1.67581e-06	0.00590029	5.46152e-07	0.00192292	1.12298e-06	0.00400789	3.64876e-07	0.00130224	3.441e-07	0.0013733	1.1465e-07	0.000457567
7570	26	3.01879e-07	0.000946545	1.00215e-07	0.000314227	1.13099e-06	0.00356738	3.71622e-07	0.00117217	-0.00011525	-0.538182	-3.87252e-05	-0.180835	1.67552e-06	0.00591703	5.46058e-07	0.00192838	1.13346e-06	0.00401917	3.68281e-07	0.0013059	3.56096e-07	0.00137679	1.18647e-07	0.000458731
7580	26	2.98752e-07	0.000949552	9.91772e-08	0.000315225	1.1181e-06	0.00357861	3.67386e-07	0.00117586	-0.000115175	-0.539334	-3.87001e-05	-0.181222	1.68829e-06	0.00593383	5.50217e-07	0.00193385	1.12527e-06	0.00403047	3.6562e-07	0.00130957	3.61694e-07	0.00138037	1.20512e-07	0.000459924
7590	26	2.90766e-07	0.000952495	9.65261e-08	0.000316202	1.11414e-06	0.00358976	3.66082e-07	0.00117952	-0.000115102	-0.540485	-3.86755e-05	-0.181609	1.68346e-06	0.00595069	5.48645e-07	0.00193935	1.121e-06	0.00404169	3.64234e-07	0.00131322	3.75948e-07	0.00138407	1.25262e-07	0.000461156
7600	26	2.95208e-07	0.000955417	9.80009e-08	0.000317172	1.11476e-06	0.00360091	3.66287e-07	0.00118319	-0.000115029	-0.541636	-3.86509e-05	-0.181995	1.67897e-06	0.00596751	5.47179e-07	0.00194483	1.12706e-06	0.00405293	3.66202e-07	0.00131687	3.69946e-07	0.00138781	1.23262e-07	0.000462402
7610	26	2.90422e-07	0.000958321	9.64121e-08	0.000318136	1.11181e-06	0.00361205	3.65319e-07	0.00118685	-0.000114931	-0.542786	-3.86181e-05	-0.182382	1.6739e-06	0.00598428	5.45529e-07	0.00195029	1.10957e-06	0.0040641	3.60518e-07	0.0013205	3.59693e-07	0.00139147	1.19846e-07	0.000463621
7620	26	2.92297e-07	0.000961246	9.70344e-08	0.000319107	1.0973e-06	0.00362309	3.60551e-07	0.00119047	-0.000114848	-0.543935	-3.85902e-05	-0.182768	1.68527e-06	0.0060011	5.49234e-07	0.00195577	1.1122e-06	0.0040752	3.61373e-07	0.00132411	3.75879e-07	0.00139515	1.25239e-07	0.000464847
7630	26	2.97662e-07	0.000964192	9.88154e-08	0.000320085	1.08634e-06	0.00363401	3.56949e-07	0.00119406	-0.000114781	-0.545083	-3.85675e-05	-0.183153	1.67902e-06	0.00601792	5.47199e-07	0.00196126	1.11534e-06	0.00408634	3.62394e-07	0.00132773	3.95803e-07	0.00139899	1.31877e-07	0.000466129
7640	26	3.06133e-07	0.000967211	1.01628e-07	0.000321087	1.08807e-06	0.00364489	3.57519e-07	0.00119764	-0.000114696	-0.54623	-3.8539e-05	-0.183539	1.67623e-06	0.00603471	5.46289e-07	0.00196673	1.12553e-06	0.00409755	3.65704e-07	0.00133137	4.11069e-07	0.00140303	1.36964e-07	0.000467474
7650	26	2.98493e-07	0.000970256	9.90912e-08	0.000322098	1.07345e-06	0.00365567	3.52713e-07	0.00120118	-0.000114618	-0.547377	-3.85129e-05	-0.183924	1.66346e-06	0.00605137	5.42126e-07	0.00197216	1.12451e-06	0.00410881	3.65375e-07	0.00133503	3.87571e-07	0.00140702	1.29134e-07	0.000468802
7660	26	2.93461e-07	0.000973222	9.74208e-08	0.000323083	1.07701e-06	0.00366642	3.53885e-07	0.00120471	-0.000114544	-0.548523	-3.84879e-05	-0.184309	1.66291e-06	0.00606803	5.41946e-07	0.00197759	1.13213e-06	0.0041201	3.67848e-07	0.00133869	3.88539e-07	0.00141088	1.29457e-07	0.000470089
7670	26	2.86173e-07	0.000976126	9.50015e-08	0.000324047	1.08235e-06	0.00367722	3.55638e-07	0.00120826	-0.000114468	-0.549668	-3.84624e-05	-0.184694	1.66457e-06	0.00608467	5.42489e-07	0.00198301	1.11652e-06	0.00413134	3.62776e-07	0.00134235	4.07756e-07	0.00141487	1.3586e-07	0.000471419
7680	26	2.77993e-07	0.00097893	9.22858e-08	0.000324977	1.08417e-06	0.00368805	3.56237e-07	0.00121182	-0.00011439	-0.550812	-3.84361e-05	-0.185078	1.67824e-06	0.00610138	5.46942e-07	0.00198846	1.12265e-06	0.00414252	3.64769e-07	0.00134598	4.05066e-07	0.00141894	1.34964e-07	0.000472775
7690	26	2.73932e-07	0.000981694	9.09378e-08	0.000325895	1.07834e-06	0.00369887	3.54322e-07	0.00121537	-0.000114307	-0.551955	-3.84084e-05	-0.185463	1.6945e-06	0.00611825	5.52242e-07	0.00199396	1.12157e-06	0.00415373	3.64417e-07	0.00134962	3.97544e-07	0.00142296	1.32457e-07	0.000474115
7700	26	2.73385e-07	0.000984418	9.07561e-08	0.000326799	1.07103e-06	0.00370962	3.5192e-07	0.00121891	-0.000114219	-0.553098	-3.83788e-05	-0.185847	1.69557e-06	0.00613521	5.52592e-07	0.00199948	1.1256e-06	0.00416497	3.65727e-07	0.00135327	3.87871e-07	0.00142688	1.29234e-07	0.00047542
7710	26	2.87231e-07	0.000987228	9.53526e-08	0.000327732	1.06624e-06	0.0037203	3.50344e-07	0.00122242	-0.000114145	-0.55424	-3.83538e-05	-0.18623	1.6978e-06	0.00615217	5.53318e-07	0.00200501	1.11618e-06	0.00417619	3.62668e-07	0.00135692	3.93315e-07	0.00143076	1.31048e-07	0.000476715
7720	26	2.85904e-07	0.00099008	9.49123e-08	0.000328679	1.06192e-06	0.00373096	3.48925e-07	0.00122592	-0.000114062	-0.555381	-3.83259e-05	-0.186614	1.68984e-06	0.00616911	5.50725e-07	0.00201053	1.11685e-06	0.00418736	3.62885e-07	0.00136055	3.95363e-07	0.00143471	1.3173e-07	0.000478029
7730	26	2.78825e-07	0.000992916	9.25622e-08	0.000329621	1.06522e-06	0.00374161	3.5001e-07	0.00122942	-0.000113996	-0.556521	-3.83038e-05	-0.186997	1.68032e-06	0.00618593	5.47619e-07	0.00201601	1.1125e-06	0.0041985	3.6147e-07	0.00136417	3.93104e-07	0.00143867	1.30978e-07	0.000479349
7740	26	2.75297e-07	0.000995684	9.13908e-08	0.00033054	1.06226e-06	0.00375225	3.49038e-07	0.00123291	-0.000113917	-0.557661	-3.82771e-05	-0.18738	1.68689e-06	0.00620277	5.49761e-07	0.0020215	1.11641e-06	0.00420964	3.62741e-07	0.00136779	3.89671e-07	0.00144258	1.29834e-07	0.000480651
7750	26	2.72212e-07	0.000998428	9.03669e-08	0.00033145	1.0624e-06	0.00376287	3.49084e-07	0.0012364	-0.000113824	-0.558799	-3.82461e-05	-0.187762	1.69272e-06	0.00621967	5.51661e-07	0.00202701	1.11442e-06	0.00422081	3.62094e-07	0.00137142	3.92438e-07	0.00144648	1.30756e-07	0.000481951
7760	26	2.64783e-07	0.00100111	8.79005e-08	0.000332342	1.06062e-06	0.0037735	3.48498e-07	0.0012399	-0.000113733	-0.559937	-3.82156e-05	-0.188145	1.70978e-06	0.00623666	5.57222e-07	0.00203255	1.10448e-06	0.0042319	3.58865e-07	0.00137502	3.93287e-07	0.00145042	1.31039e-07	0.000483264
7770	26	2.59089e-07	0.00100372	8.60103e-08	0.000333207	1.0536e-06	0.00378404	3.46192e-07	0.00124336	-0.000113647	-0.561074	-3.81865e-05	-0.188527	1.70725e-06	0.00625378	5.56398e-07	0.00203812	1.09333e-06	0.00424289	3.55243e-07	0.00137859	3.82166e-07	0.00145429	1.27334e-07	0.000484553
7780	26	2.63034e-07	0.00100633	8.73201e-08	0.000334073	1.05983e-06	0.00379461	3.48239e-07	0.00124683	-0.000113559	-0.56221	-3.81569e-05	-0.188908	1.70443e-06	0.00627083	5.55478e-07	0.00204368	1.09403e-06	0.00425383	3.55471e-07	0.00138215	3.83136e-07	0.00145811	1.27657e-07	0.000485827
7790	26	2.64957e-07	0.00100897	8.79582e-08	0.00033495	1.05146e-06	0.00380518	3.45488e-07	0.0012503	-0.000113472	-0.563345	-3.81279e-05	-0.18929	1.70858e-06	0.0062879	5.56832e-07	0.00204924	1.10226e-06	0.0042648	3.58144e-07	0.00138571	3.90586e-07	0.00146198	1.30139e-07	0.000487114
7800	26	2.74787e-07	0.00101167	9.12216e-08	0.000335847	1.05706e-06	0.00381573	3.47329e-07	0.00125377	-0.000113383	-0.56448	-3.80979e-05	-0.189671	1.70469e-06	0.00630498	5.55564e-07	0.00205481	1.11445e-06	0.00427587	3.62106e-07	0.00138931	3.87027e-07	0.00146588	1.28953e-07	0.000488415
7810	26	2.78452e-07	0.00101445	9.24382e-08	0.00033677	1.04782e-06	0.00382625	3.44291e-07	0.00125723	-0.000113295	-0.565613	-3.80684e-05	-0.190052	1.70444e-06	0.00632202	5.55483e-07	0.00206037	1.12849e-06	0.0042871	3.66666e-07	0.00139296	3.79821e-07	0.00146971	1.26552e-07	0.000489692
7820	26	2.86062e-07	0.00101727	9.49647e-08	0.000337704	1.04333e-06	0.00383671	3.42819e-07	0.00126067	-0.000113212	-0.566746	-3.80405e-05	-0.190432	1.70734e-06	0.00633908	5.56427e-07	0.00206592	1.12078e-06	0.00429835	3.64162e-07	0.00139661	3.7317e-07	0.00147348	1.24336e-07	0.000490947
7830	26	2.86681e-07	0.00102014	9.517e-08	0.000338659	1.03768e-06	0.0038471	3.40962e-07	0.00126408	-0.000113138	-0.567877	-3.80156e-05	-0.190813	1.72426e-06	0.00635624	5.6194e-07	0.00207151	1.12792e-06	0.00430957	3.6648e-07	0.00140026	3.64732e-07	0.00147716	1.21525e-07	0.000492175
7840	26	2.73353e-07	0.00102296	9.07456e-08	0.000339596	1.03884e-06	0.00385749	3.41341e-07	0.00126749	-0.000113055	-0.569008	-3.79877e-05	-0.191193	1.71481e-06	0.00637344	5.58862e-07	0.00207712	1.12786e-06	0.00432085	3.66462e-07	0.00140392	3.71125e-07	0.00148083	1.23655e-07	0.000493397
7850	26	2.65141e-07	0.00102565	8.80195e-08	0.000340487	1.03367e-06	0.00386785	3.39643e-07	0.0012709	-0.000112968	-0.570138	-3.79583e-05	-0.191572	1.7166e-06	0.0063906	5.59444e-07	0.00208271	1.13216e-06	0.00433214	3.67859e-07	0.00140759	3.77613e-07	0.00148458	1.25816e-07	0.000494645
7860	26	2.56151e-07	0.00102827	8.50352e-08	0.000341356	1.03687e-06	0.00387819	3.40696e-07	0.00127429	-0.000112882	-0.571268	-3.79295e-05	-0.191952	1.71586e-06	0.00640774	5.59203e-07	0.0020883	1.1387e-06	0.0043435	3.69985e-07	0.00141128	3.79816e-07	0.00148838	1.2655e-07	0.00049591
7870	26	2.69525e-07	0.00103091	8.94749e-08	0.000342233	1.05214e-06	0.00388867	3.45713e-07	0.00127774	-0.000112802	-0.572396	-3.79025e-05	-0.192331	1.72194e-06	0.00642494	5.61186e-07	0.0020939	1.12145e-06	0.00435483	3.64378e-07	0.00141496	3.83088e-07	0.00149218	1.27641e-07	0.000497178
7880	26	2.70453e-07	0.00103359	8.97828e-08	0.000343124	1.05363e-06	0.00389919	3.46202e-07	0.0012812	-0.000112717	-0.573524	-3.78741e-05	-0.19271	1.72837e-06	0.00644219	5.63281e-07	0.00209953	1.11935e-06	0.00436603	3.63697e-07	0.0014186	3.92676e-07	0.00149606	1.30835e-07	0.000498471
7890	26	2.70403e-07	0.00103632	8.97664e-08	0.000344028	1.04338e-06	0.00390969	3.42834e-07	0.00128464	-0.000112631	-0.57465	-3.78452e-05	-0.193088	1.71531e-06	0.00645942	5.59023e-07	0.00210514	1.11826e-06	0.00437722	3.63344e-07	0.00142224	3.85802e-07	0.00149997	1.28545e-07	0.000499772
7900	26	2.51898e-07	0.00103893	8.36233e-08	0.000344895	1.05136e-06	0.00392013	3.45456e-07	0.00128808	-0.000112543	-0.575776	-3.78157e-05	-0.193467	1.71553e-06	0.00647657	5.59096e-07	0.00211073	1.11669e-06	0.00438839	3.62831e-07	0.00142587	3.6629e-07	0.00150374	1.22044e-07	0.000501029
7910	26	2.52306e-07	0.00104144	8.37587e-08	0.000345729	1.04956e-06	0.00393067	3.44864e-07	0.00129154	-0.000112462	-0.576901	-3.77883e-05	-0.193845	1.71645e-06	0.00649372	5.59396e-07	0.00211632	1.11186e-06	0.00439954	3.61262e-07	0.00142949	3.64589e-07	0.00150739	1.21477e-07	0.000502245
7920	26	2.5906e-07	0.00104401	8.60007e-08	0.000346583	1.04228e-06	0.0039411	3.42472e-07	0.00129497	-0.000112387	-0.578025	-3.7763e-05	-0.194222	1.70664e-06	0.00651083	5.56198e-07	0.0021219	1.1111e-06	0.00441066	3.61016e-07	0.0014331	3.7384e-07	0.0015111	1.24559e-07	0.000503482
7930	26	2.54137e-07	0.00104657	8.43663e-08	0.000347431	1.0443e-06	0.00395154	3.43134e-07	0.0012984	-0.000112302	-0.579149	-3.77346e-05	-0.1946	1.7171e-06	0.00652796	5.59608e-07	0.00212748	1.11744e-06	0.00442179	3.63078e-07	0.00143672	3.70573e-07	0.00151482	1.23471e-07	0.00050472
7940	26	2.49016e-07	0.0010491	8.26666e-08	0.000348272	1.0394e-06	0.00396197	3.41526e-07	0.00130182	-0.000112216	-0.580271	-3.77058e-05	-0.194977	1.71777e-06	0.00654513	5.59827e-07	0.00213308	1.11992e-06	0.00443299	3.63883e-07	0.00144036	3.67652e-07	0.00151851	1.22497e-07	0.000505952
7950	26	2.50437e-07	0.00105157	8.31382e-08	0.000349092	1.03016e-06	0.0039723	3.38491e-07	0.00130522	-0.000112131	-0.581393	-3.76773e-05	-0.195354	1.71823e-06	0.00656232	5.59975e-07	0.00213868	1.12237e-06	0.0044442	3.6468e-07	0.001444	3.76915e-07	0.00152221	1.25584e-07	0.000507184
7960	26	2.70429e-07	0.00105418	8.97749e-08	0.000349958	1.04166e-06	0.00398264	3.42269e-07	0.00130862	-0.00011205	-0.582514	-3.765e-05	-0.195731	1.71245e-06	0.00657947	5.58093e-07	0.00214427	1.1118e-06	0.00445539	3.61243e-07	0.00144764	3.75024e-07	0.00152598	1.24954e-07	0.000508441
7970	26	2.69109e-07	0.00105689	8.93368e-08	0.000350858	1.05891e-06	0.00399315	3.47936e-07	0.00131207	-0.000111968	-0.583634	-3.76225e-05	-0.196107	1.69974e-06	0.00659652	5.53951e-07	0.00214982	1.10677e-06	0.00446647	3.59608e-07	0.00145124	3.73162e-07	0.00152973	1.24333e-07	0.000509689
7980	26	2.64185e-07	0.00105955	8.7702e-08	0.000351742	1.06072e-06	0.00400376	3.48533e-07	0.00131555	-0.000111887	-0.584753	-3.75953e-05	-0.196483	1.7093e-06	0.00661356	5.57064e-07	0.00215538	1.11362e-06	0.00447757	3.61834e-07	0.00145484	3.72752e-07	0.00153346	1.24197e-07	0.000510932
7990	26	2.67545e-07	0.00106221	8.88176e-08	0.000352624	1.0578e-06	0.00401437	3.47572e-07	0.00131904	-0.000111801	-0.585872	-3.75664e-05	-0.196859	1.71304e-06	0.00663068	5.58286e-07	0.00216096	1.11384e-06	0.00448871	3.61906e-07	0.00145846	3.64187e-07	0.00153715	1.21343e-07	0.000512162
8000	26	2.55849e-07	0.00106483	8.49346e-08	0.000353494	1.0595e-06	0.00402494	3.4813e-07	0.00132251	-0.000111712	-0.58699	-3.75363e-05	-0.197234	1.72125e-06	0.00664786	5.60961e-07	0.00216656	1.12122e-06	0.00449989	3.64304e-07	0.0014621	3.50849e-07	0.00154073	1.16899e-07	0.000513353
8010	26	2.53368e-07	0.00106736	8.4111e-08	0.000354335	1.0474e-06	0.00403549	3.44155e-07	0.00132598	-0.000111626	-0.588106	-3.75074e-05	-0.19761	1.73183e-06	0.00666512	5.64409e-07	0.00217218	1.12455e-06	0.00451112	3.65386e-07	0.00146574	3.47527e-07	0.00154421	1.15792e-07	0.000514514
8020	26	2.65719e-07	0.00106995	8.82114e-08	0.000355193	1.04457e-06	0.00404595	3.43224e-07	0.00132942	-0.000111547	-0.589222	-3.7481e-05	-0.197985	1.71075e-06	0.00668234	5.57539e-07	0.00217779	1.11961e-06	0.00452236	3.63781e-07	0.00146939	3.595e-07	0.00154776	1.19782e-07	0.000515697
8030	26	2.73354e-07	0.00107266	9.07459e-08	0.000356093	1.0346e-06	0.00405634	3.3995e-07	0.00133283	-0.000111464	-0.590337	-3.74532e-05	-0.198359	1.6943e-06	0.00669935	5.52178e-07	0.00218334	1.11466e-06	0.0045335	3.62172e-07	0.00147302	3.69995e-07	0.00155139	1.23278e-07	0.000516906
8040	26	2.70459e-07	0.00107537	8.97847e-08	0.000356994	1.04999e-06	0.00406677	3.45005e-07	0.00133626	-0.000111383	-0.591451	-3.74259e-05	-0.198734	1.69012e-06	0.00671629	5.50816e-07	0.00218886	1.12117e-06	0.00454468	3.64288e-07	0.00147665	3.65911e-07	0.00155506	1.21918e-07	0.000518129
8050	26	2.63623e-07	0.00107804	8.75155e-08	0.000357878	1.05006e-06	0.00407727	3.45028e-07	0.00133971	-0.000111291	-0.592565	-3.73951e-05	-0.199108	1.6899e-06	0.00673323	5.50744e-07	0.00219438	1.10676e-06	0.00455583	3.59607e-07	0.00148027	3.76844e-07	0.00155877	1.2556e-07	0.000519366
8060	26	2.52551e-07	0.00108064	8.38401e-08	0.000358744	1.05192e-06	0.00408778	3.45639e-07	0.00134316	-0.0001112	-0.593677	-3.73644e-05	-0.199482	1.68636e-06	0.00675012	5.4959e-07	0.00219988	1.09255e-06	0.00456682	3.5499e-07	0.00148384	3.59782e-07	0.00156249	1.19875e-07	0.000520605
8070	26	2.40728e-07	0.0010831	7.9915e-08	0.000359558	1.03705e-06	0.00409822	3.40753e-07	0.00134659	-0.00011112	-0.594789	-3.73375e-05	-0.199855	1.6909e-06	0.006767	5.51069e-07	0.00220538	1.09711e-06	0.00457777	3.56471e-07	0.0014874	3.45084e-07	0.00156601	1.14978e-07	0.000521778
8080	26	2.28261e-07	0.00108544	7.57765e-08	0.000360336	1.03313e-06	0.00410857	3.39464e-07	0.00134999	-0.000111031	-0.5959	-3.73075e-05	-0.200228	1.68297e-06	0.00678385	5.48485e-07	0.00221087	1.10817e-06	0.0045888	3.60065e-07	0.00149098	3.46098e-07	0.00156946	1.15316e-07	0.000522928
8090	26	2.20575e-07	0.00108769	7.32248e-08	0.000361083	1.0269e-06	0.00411887	3.37418e-07	0.00135338	-0.000110954	-0.597009	-3.72817e-05	-0.200601	1.67508e-06	0.00680064	5.45915e-07	0.00221635	1.10123e-06	0.00459985	3.57808e-07	0.00149457	3.49493e-07	0.00157295	1.16447e-07	0.000524089
8100	26	2.14043e-07	0.00108986	7.10564e-08	0.000361803	1.03185e-06	0.00412915	3.39044e-07	0.00135676	-0.00011087	-0.598119	-3.72534e-05	-0.200974	1.69283e-06	0.00681747	5.51697e-07	0.00222183	1.08662e-06	0.0046108	3.53062e-07	0.00149813	3.34783e-07	0.00157638	1.11546e-07	0.000525232
8110	26	2.04125e-07	0.00109196	6.77637e-08	0.000362502	1.02054e-06	0.00413942	3.3533e-07	0.00136013	-0.000110775	-0.599227	-3.72217e-05	-0.201346	1.69814e-06	0.00683443	5.53428e-07	0.00222736	1.10855e-06	0.00462178	3.60187e-07	0.0015017	3.26248e-07	0.00157968	1.08702e-07	0.000526331
8120	26	2.05681e-07	0.00109402	6.82804e-08	0.000363184	1.01949e-06	0.00414961	3.34983e-07	0.00136348	-0.000110693	-0.600334	-3.71939e-05	-0.201718	1.68686e-06	0.00685135	5.49752e-07	0.00223287	1.12787e-06	0.00463296	3.66467e-07	0.00150533	3.16011e-07	0.0015829	1.05291e-07	0.000527403
8130	26	2.16069e-07	0.00109613	7.17288e-08	0.000363886	1.01271e-06	0.0041598	3.32755e-07	0.00136683	-0.000110614	-0.601441	-3.71674e-05	-0.20209	1.69461e-06	0.00686828	5.52278e-07	0.00223839	1.11834e-06	0.00464421	3.63367e-07	0.00150899	2.99434e-07	0.00158597	9.9768e-08	0.000528428
8140	26	2.12406e-07	0.00109827	7.0513e-08	0.000364596	1.00239e-06	0.00416988	3.29364e-07	0.00137014	-0.000110526	-0.602546	-3.7138e-05	-0.202462	1.68809e-06	0.0068852	5.50153e-07	0.0022439	1.10569e-06	0.00465533	3.59257e-07	0.0015126	2.989e-07	0.00158897	9.95902e-08	0.000529426
8150	26	2.007e-07	0.00110033	6.66269e-08	0.000365278	9.97147e-07	0.00417986	3.27643e-07	0.00137342	-0.00011043	-0.603651	-3.71055e-05	-0.202833	1.6866e-06	0.00690207	5.49668e-07	0.0022494	1.09186e-06	0.00466631	3.54765e-07	0.00151617	2.96629e-07	0.00159194	9.88335e-08	0.000530417
8160	26	2.17524e-07	0.00110241	7.22119e-08	0.000365968	9.95798e-07	0.00418984	3.27199e-07	0.0013767	-0.000110334	-0.604755	-3.70734e-05	-0.203204	1.67938e-06	0.00691889	5.47315e-07	0.00225489	1.08493e-06	0.00467719	3.52513e-07	0.0015197	3.08216e-07	0.00159495	1.02694e-07	0.000531421
8170	26	2.25742e-07	0.00110465	7.49402e-08	0.000366712	9.75996e-07	0.00419971	3.20693e-07	0.00137994	-0.000110247	-0.605858	-3.70443e-05	-0.203574	1.67825e-06	0.00693571	5.46947e-07	0.00226037	1.09163e-06	0.00468806	3.54689e-07	0.00152324	3.19462e-07	0.00159809	1.06441e-07	0.000532464
8180	26	2.16369e-07	0.00110683	7.18286e-08	0.000367436	9.78984e-07	0.0042095	3.21674e-07	0.00138316	-0.000110147	-0.60696	-3.70104e-05	-0.203945	1.67255e-06	0.00695246	5.45087e-07	0.00226583	1.09568e-06	0.00469902	3.56007e-07	0.0015268	3.12134e-07	0.00160123	1.04e-07	0.000533513
8190	26	2.11855e-07	0.00110899	7.03299e-08	0.000368155	9.74476e-07	0.00421925	3.20193e-07	0.00138636	-0.000110041	-0.608061	-3.69748e-05	-0.204315	1.67214e-06	0.00696918	5.44954e-07	0.00227127	1.10226e-06	0.00471001	3.58144e-07	0.00153037	2.94785e-07	0.00160426	9.82191e-08	0.000534522
8200	26	2.11055e-07	0.0011111	7.00643e-08	0.000368855	9.74465e-07	0.004229	3.2019e-07	0.00138956	-0.000109932	-0.609161	-3.69382e-05	-0.204684	1.67458e-06	0.00698591	5.45751e-07	0.00227673	1.09836e-06	0.00472101	3.56878e-07	0.00153394	2.93189e-07	0.00160721	9.76873e-08	0.000535505
8210	26	2.08876e-07	0.00111321	6.93409e-08	0.000369554	9.81983e-07	0.00423877	3.2266e-07	0.00139277	-0.000109834	-0.61026	-3.69052e-05	-0.205053	1.67886e-06	0.00700268	5.47146e-07	0.00228219	1.08707e-06	0.00473195	3.53208e-07	0.0015375	2.79117e-07	0.00161008	9.29986e-08	0.000536462
8220	26	2.00629e-07	0.00111525	6.66032e-08	0.000370232	9.75228e-07	0.00424857	3.2044e-07	0.001396	-0.000109736	-0.611357	-3.68726e-05	-0.205422	1.69345e-06	0.00701957	5.519e-07	0.0022877	1.07584e-06	0.00474276	3.4956e-07	0.00154101	2.86617e-07	0.00161291	9.54976e-08	0.000537403
8230	26	2.05418e-07	0.00111728	6.81931e-08	0.000370904	9.64631e-07	0.00425828	3.16958e-07	0.00139919	-0.00010963	-0.612454	-3.68369e-05	-0.205791	1.68447e-06	0.00703646	5.48974e-07	0.0022932	1.08062e-06	0.00475357	3.51112e-07	0.00154452	2.79168e-07	0.00161572	9.30157e-08	0.000538341
8240	26	2.06535e-07	0.00111934	6.85638e-08	0.000371591	9.52264e-07	0.00426787	3.12895e-07	0.00140233	-0.00010953	-0.61355	-3.6803e-05	-0.206159	1.66564e-06	0.00705321	5.42836e-07	0.00229866	1.07276e-06	0.00476434	3.48559e-07	0.00154802	2.90384e-07	0.00161857	9.67527e-08	0.00053929
8250	26	1.98212e-07	0.00112136	6.58009e-08	0.000372261	9.50095e-07	0.00427736	3.12182e-07	0.00140545	-0.000109422	-0.614645	-3.67671e-05	-0.206527	1.66687e-06	0.00706986	5.43237e-07	0.00230409	1.06718e-06	0.00477503	3.46744e-07	0.00155149	2.91563e-07	0.00162149	9.71455e-08	0.000540261
8260	26	1.94145e-07	0.00112332	6.44509e-08	0.000372912	9.62731e-07	0.00428693	3.16334e-07	0.0014086	-0.000109301	-0.615738	-3.67263e-05	-0.206894	1.6661e-06	0.00708654	5.42987e-07	0.00230952	1.07073e-06	0.00478571	3.47899e-07	0.00155496	2.92835e-07	0.0016244	9.75695e-08	0.000541234
8270	26	1.89257e-07	0.00112525	6.28282e-08	0.000373551	9.66544e-07	0.00429658	3.17587e-07	0.00141177	-0.000109197	-0.616831	-3.66913e-05	-0.207261	1.66801e-06	0.00710319	5.43608e-07	0.00231495	1.08423e-06	0.00479649	3.52287e-07	0.00155847	2.96834e-07	0.00162734	9.89018e-08	0.000542213
8280	26	1.92261e-07	0.00112716	6.38252e-08	0.000374186	9.71311e-07	0.00430628	3.19153e-07	0.00141496	-0.000109077	-0.617922	-3.66509e-05	-0.207628	1.65221e-06	0.00711982	5.38461e-07	0.00232037	1.08303e-06	0.00480734	3.51897e-07	0.00156199	2.94601e-07	0.0016303	9.81577e-08	0.000543197
8290	26	1.8587e-07	0.00112905	6.17037e-08	0.000374813	9.70147e-07	0.00431598	3.18771e-07	0.00141814	-0.000108963	-0.619012	-3.66127e-05	-0.207995	1.62711e-06	0.0071362	5.30279e-07	0.00232571	1.06846e-06	0.00481809	3.47163e-07	0.00156548	2.89543e-07	0.00163322	9.64725e-08	0.00054417
8300	26	1.83973e-07	0.0011309	6.10738e-08	0.000375426	9.79049e-07	0.00432573	3.21696e-07	0.00142135	-0.000108847	-0.620102	-3.65735e-05	-0.20836	1.63615e-06	0.00715248	5.33225e-07	0.00233101	1.05497e-06	0.00482872	3.42779e-07	0.00156894	2.92218e-07	0.00163612	9.7364e-08	0.000545137
8310	26	1.85108e-07	0.00113275	6.14506e-08	0.000376042	9.76796e-07	0.0043355	3.20955e-07	0.00142456	-0.000108721	-0.621189	-3.65315e-05	-0.208726	1.64354e-06	0.0071689	5.35633e-07	0.00233636	1.05434e-06	0.00483923	3.42574e-07	0.00157235	3.06376e-07	0.00163913	1.02081e-07	0.000546141
8320	26	1.84215e-07	0.00113458	6.11542e-08	0.000376648	9.68857e-07	0.00434523	3.18347e-07	0.00142776	-0.000108605	-0.622276	-3.64924e-05	-0.209091	1.64602e-06	0.00718536	5.36441e-07	0.00234173	1.05696e-06	0.0048498	3.43426e-07	0.00157579	3.04156e-07	0.00164218	1.01342e-07	0.000547158
8330	26	1.90424e-07	0.00113646	6.32156e-08	0.000377273	9.62503e-07	0.00435489	3.16259e-07	0.00143093	-0.00010848	-0.623361	-3.64503e-05	-0.209456	1.63607e-06	0.00720177	5.33198e-07	0.00234708	1.05539e-06	0.00486036	3.42914e-07	0.00157922	3.08817e-07	0.00164525	1.02895e-07	0.000548178
8340	26	1.81966e-07	0.00113832	6.04077e-08	0.000377891	9.6707e-07	0.00436453	3.1776e-07	0.0014341	-0.000108352	-0.624446	-3.64073e-05	-0.20982	1.62063e-06	0.00721808	5.28167e-07	0.00235239	1.05336e-06	0.0048709	3.42257e-07	0.00158264	3.09452e-07	0.00164834	1.03106e-07	0.000549209
8350	26	1.80047e-07	0.00114012	5.97707e-08	0.000378487	9.59897e-07	0.00437415	3.15403e-07	0.00143726	-0.000108243	-0.625529	-3.63709e-05	-0.210184	1.61401e-06	0.00723427	5.26011e-07	0.00235767	1.06382e-06	0.00488151	3.45656e-07	0.00158609	2.96164e-07	0.00165135	9.86786e-08	0.000550213
8360	26	1.92689e-07	0.00114197	6.39676e-08	0.000379103	9.77608e-07	0.00438385	3.21222e-07	0.00144045	-0.000108119	-0.62661	-3.6329e-05	-0.210547	1.6159e-06	0.0072504	5.26627e-07	0.00236292	1.06031e-06	0.00489212	3.44515e-07	0.00158954	2.98496e-07	0.00165433	9.94556e-08	0.000551205
8370	26	2.00329e-07	0.00114395	6.65036e-08	0.000379761	9.71052e-07	0.00439361	3.19068e-07	0.00144365	-0.000107995	-0.627691	-3.62875e-05	-0.210911	1.59711e-06	0.00726647	5.20504e-07	0.00236816	1.06043e-06	0.00490271	3.44554e-07	0.00159298	2.99774e-07	0.00165734	9.98814e-08	0.000552207
8380	26	1.86036e-07	0.00114589	6.17587e-08	0.000380403	9.72579e-07	0.00440333	3.1957e-07	0.00144685	-0.000107872	-0.62877	-3.6246e-05	-0.211273	1.6015e-06	0.00728244	5.21932e-07	0.00237337	1.04653e-06	0.00491325	3.40038e-07	0.0015964	3.00611e-07	0.00166036	1.0016e-07	0.000553213
8390	26	1.79457e-07	0.0011477	5.95746e-08	0.000381006	9.82182e-07	0.00441311	3.22725e-07	0.00145006	-0.000107743	-0.629848	-3.62026e-05	-0.211635	1.60372e-06	0.00729849	5.22658e-07	0.0023786	1.03408e-06	0.00492364	3.3599e-07	0.00159978	2.90619e-07	0.0016633	9.68312e-08	0.000554195
8400	26	1.87874e-07	0.00114953	6.23688e-08	0.000381611	9.85742e-07	0.00442294	3.23895e-07	0.00145329	-0.000107614	-0.630925	-3.61593e-05	-0.211997	1.59429e-06	0.00731446	5.19583e-07	0.0023838	1.04436e-06	0.00493402	3.39332e-07	0.00160315	2.98654e-07	0.00166624	9.95082e-08	0.000555172
8410	26	1.71042e-07	0.00115134	5.67813e-08	0.000382214	9.74529e-07	0.00443273	3.2021e-07	0.00145651	-0.000107486	-0.632001	-3.61165e-05	-0.212359	1.57827e-06	0.00733033	5.14361e-07	0.00238897	1.0406e-06	0.00494446	3.38111e-07	0.00160654	3.07689e-07	0.0016693	1.02518e-07	0.000556193
8420	26	1.65427e-07	0.001153	5.4917e-08	0.000382765	9.74378e-07	0.00444247	3.20161e-07	0.00145971	-0.000107351	-0.633075	-3.60711e-05	-0.21272	1.57428e-06	0.00734608	5.13062e-07	0.00239411	1.0361e-06	0.00495483	3.36648e-07	0.00160991	3.0601e-07	0.00167235	1.01959e-07	0.000557208
8430	26	1.63032e-07	0.00115467	5.41222e-08	0.000383317	9.70524e-07	0.00445221	3.18895e-07	0.00146291	-0.000107206	-0.634148	-3.60224e-05	-0.21308	1.56518e-06	0.00736178	5.10096e-07	0.00239922	1.04158e-06	0.00496523	3.3843e-07	0.00161329	3.079e-07	0.00167541	1.02589e-07	0.000558228
8440	26	1.58969e-07	0.00115627	5.27733e-08	0.000383849	9.70977e-07	0.00446192	3.19044e-07	0.0014661	-0.000107067	-0.635219	-3.59756e-05	-0.21344	1.54202e-06	0.00737732	5.0255e-07	0.00240429	1.0476e-06	0.00497568	3.40384e-07	0.00161669	3.08803e-07	0.0016785	1.0289e-07	0.000559257
8450	26	1.38907e-07	0.00115778	4.61134e-08	0.000384351	9.73894e-07	0.00447167	3.20002e-07	0.0014693	-0.000106936	-0.636289	-3.59317e-05	-0.2138	1.54287e-06	0.00739274	5.02827e-07	0.00240931	1.04264e-06	0.00498613	3.38772e-07	0.00162008	2.96772e-07	0.00168155	9.88811e-08	0.000560273
8460	26	1.3367e-07	0.00115912	4.43747e-08	0.000384796	9.56088e-07	0.00448132	3.14151e-07	0.00147247	-0.000106802	-0.637358	-3.58866e-05	-0.214159	1.53747e-06	0.00740813	5.01066e-07	0.00241433	1.03976e-06	0.00499656	3.37838e-07	0.00162347	2.98721e-07	0.00168452	9.95304e-08	0.000561263
8470	26	1.35017e-07	0.00116048	4.48219e-08	0.000385246	9.59275e-07	0.00449089	3.15198e-07	0.00147562	-0.000106683	-0.638425	-3.58466e-05	-0.214517	1.54961e-06	0.00742357	5.05023e-07	0.00241936	1.04036e-06	0.00500697	3.38032e-07	0.00162686	2.8428e-07	0.00168742	9.47188e-08	0.000562229
8480	26	1.35573e-07	0.00116182	4.50064e-08	0.000385692	9.58298e-07	0.00450048	3.14877e-07	0.00147877	-0.000106537	-0.639491	-3.57976e-05	-0.214876	1.55404e-06	0.0074391	5.06466e-07	0.00242442	1.03523e-06	0.00501732	3.36365e-07	0.00163022	2.86611e-07	0.00169027	9.54956e-08	0.000563179
8490	26	1.36575e-07	0.0011632	4.53392e-08	0.000386151	9.44562e-07	0.00451	3.10364e-07	0.0014819	-0.00010641	-0.640556	-3.57549e-05	-0.215233	1.56496e-06	0.00745471	5.10024e-07	0.00242951	1.02555e-06	0.00502761	3.3322e-07	0.00163356	2.79277e-07	0.00169311	9.3052e-08	0.000564126
8500	26	1.24315e-07	0.00116451	4.1269e-08	0.000386586	9.44633e-07	0.00451944	3.10388e-07	0.001485	-0.000106282	-0.641619	-3.5712e-05	-0.215591	1.56256e-06	0.00747035	5.09242e-07	0.00243461	1.01997e-06	0.00503784	3.31408e-07	0.00163689	2.69036e-07	0.00169585	8.96399e-08	0.000565039
8510	26	1.18307e-07	0.0011657	3.92747e-08	0.000386981	9.4463e-07	0.0045289	3.10387e-07	0.0014881	-0.000106161	-0.642682	-3.56712e-05	-0.215948	1.56354e-06	0.00748597	5.09561e-07	0.0024397	1.008e-06	0.00504799	3.27518e-07	0.00164018	2.766e-07	0.00169857	9.21601e-08	0.000565946
8520	26	1.20018e-07	0.0011669	3.98426e-08	0.000387379	9.39557e-07	0.00453831	3.0872e-07	0.0014912	-0.000106043	-0.643743	-3.56315e-05	-0.216304	1.55992e-06	0.00750158	5.08383e-07	0.00244479	1.01613e-06	0.00505811	3.30159e-07	0.00164347	2.71578e-07	0.00170131	9.04869e-08	0.000566859
8530	26	1.18911e-07	0.0011681	3.94752e-08	0.000387775	9.40505e-07	0.00454771	3.09031e-07	0.00149429	-0.000105941	-0.644803	-3.55971e-05	-0.21666	1.54578e-06	0.00751714	5.03775e-07	0.00244986	1.00479e-06	0.00506824	3.26474e-07	0.00164676	2.54713e-07	0.00170397	8.48675e-08	0.000567745
8540	26	9.49362e-08	0.00116914	3.15162e-08	0.000388123	9.39537e-07	0.00455713	3.08713e-07	0.00149738	-0.000105822	-0.645861	-3.55572e-05	-0.217016	1.53892e-06	0.00753256	5.01537e-07	0.00245488	1.0117e-06	0.00507832	3.2872e-07	0.00165004	2.57941e-07	0.00170653	8.59431e-08	0.000568596
8550	26	9.97269e-08	0.00117011	3.31066e-08	0.000388445	9.47148e-07	0.00456656	3.11214e-07	0.00150048	-0.000105712	-0.646919	-3.55203e-05	-0.217371	1.52866e-06	0.00754789	4.98196e-07	0.00245988	1.00661e-06	0.0050884	3.27067e-07	0.00165331	2.32539e-07	0.00170898	7.74795e-08	0.000569413
8560	26	8.97959e-08	0.00117106	2.98097e-08	0.000388759	9.36199e-07	0.00457597	3.07616e-07	0.00150357	-0.000105593	-0.647976	-3.54805e-05	-0.217726	1.51617e-06	0.00756312	4.94123e-07	0.00246484	1.00582e-06	0.00509845	3.26809e-07	0.00165658	2.1611e-07	0.0017112	7.20055e-08	0.000570154
8570	26	9.19316e-08	0.00117196	3.05187e-08	0.000389057	9.36239e-07	0.00458533	3.07629e-07	0.00150665	-0.000105488	-0.649031	-3.54449e-05	-0.218081	1.51286e-06	0.00757825	4.93045e-07	0.00246977	1.01408e-06	0.00510857	3.29492e-07	0.00165987	2.22308e-07	0.0017134	7.40706e-08	0.000570886
8580	26	9.58299e-08	0.00117289	3.18129e-08	0.000389369	9.33539e-07	0.00459469	3.06742e-07	0.00150972	-0.000105385	-0.650085	-3.54104e-05	-0.218435	1.52421e-06	0.00759344	4.96744e-07	0.00247472	1.00053e-06	0.00511864	3.2509e-07	0.00166314	2.22681e-07	0.00171562	7.41949e-08	0.000571627
8590	26	1.06105e-07	0.0011739	3.5224e-08	0.000389703	9.20098e-07	0.00460394	3.02326e-07	0.00151276	-0.000105283	-0.651139	-3.53762e-05	-0.218789	1.52887e-06	0.00760871	4.98262e-07	0.0024797	9.99361e-07	0.00512863	3.2471e-07	0.00166638	2.27093e-07	0.00171787	7.56648e-08	0.000572374
8600	26	1.15956e-07	0.00117504	3.84942e-08	0.000390082	9.03641e-07	0.00461306	2.96918e-07	0.00151576	-0.000105172	-0.652191	-3.53388e-05	-0.219143	1.52676e-06	0.007624	4.97575e-07	0.00248468	9.80922e-07	0.00513853	3.18719e-07	0.0016696	2.28598e-07	0.00172013	7.61663e-08	0.000573127
8610	26	1.18915e-07	0.00117623	3.94765e-08	0.000390477	9.15121e-07	0.00462216	3.0069e-07	0.00151875	-0.00010506	-0.653242	-3.53012e-05	-0.219496	1.53399e-06	0.00763928	4.99932e-07	0.00248966	9.77514e-07	0.0051483	3.17612e-07	0.00167277	2.16459e-07	0.00172236	7.21217e-08	0.000573871
8620	26	1.1194e-07	0.0011774	3.71608e-08	0.000390863	9.25232e-07	0.00463136	3.04013e-07	0.00152177	-0.000104942	-0.654292	-3.52615e-05	-0.219849	1.53898e-06	0.00765467	5.01558e-07	0.00249468	9.73671e-07	0.00515805	3.16363e-07	0.00167594	2.02231e-07	0.00172447	6.73811e-08	0.000574574
8630	26	1.17428e-07	0.00117853	3.89828e-08	0.00039124	9.3701e-07	0.00464068	3.07883e-07	0.00152483	-0.000104824	-0.655341	-3.52219e-05	-0.220201	1.53493e-06	0.00767005	5.00238e-07	0.00249969	9.79051e-07	0.00516781	3.18111e-07	0.00167911	2.00836e-07	0.00172647	6.69164e-08	0.000575239
8640	26	1.16719e-07	0.00117972	3.87475e-08	0.000391633	9.32007e-07	0.00465003	3.06239e-07	0.00152791	-0.000104726	-0.656389	-3.51889e-05	-0.220553	1.52405e-06	0.00768534	4.96693e-07	0.00250467	9.89177e-07	0.00517765	3.21401e-07	0.00168231	2.1661e-07	0.00172855	7.21722e-08	0.000575933
8650	26	1.17582e-07	0.00118089	3.9034e-08	0.000392022	9.2712e-07	0.00465931	3.04633e-07	0.00153095	-0.000104635	-0.657435	-3.51583e-05	-0.220905	1.51627e-06	0.00770054	4.94157e-07	0.00250963	9.95162e-07	0.00518755	3.23346e-07	0.00168553	2.32783e-07	0.0017308	7.75606e-08	0.000576683
8660	26	1.35598e-07	0.00118216	4.50147e-08	0.000392446	9.12943e-07	0.00466851	2.99975e-07	0.00153398	-0.000104532	-0.658481	-3.51239e-05	-0.221256	1.50536e-06	0.00771563	4.906e-07	0.00251455	9.85092e-07	0.00519745	3.20074e-07	0.00168874	2.27469e-07	0.00173312	7.57901e-08	0.000577457
8670	26	1.31103e-07	0.0011835	4.35225e-08	0.000392889	9.21943e-07	0.00467767	3.02932e-07	0.00153699	-0.000104438	-0.659526	-3.50921e-05	-0.221608	1.5065e-06	0.00773067	4.90972e-07	0.00251945	9.82848e-07	0.00520729	3.19345e-07	0.00169194	2.31901e-07	0.00173545	7.72669e-08	0.000578232
8680	26	1.34595e-07	0.00118483	4.46819e-08	0.000393329	9.34616e-07	0.00468696	3.07096e-07	0.00154004	-0.000104353	-0.66057	-3.50637e-05	-0.221958	1.51384e-06	0.0077458	4.93363e-07	0.00252438	9.81038e-07	0.0052171	3.18757e-07	0.00169513	2.14497e-07	0.0017377	7.14681e-08	0.000578981
8690	26	1.32718e-07	0.00118616	4.40587e-08	0.000393773	9.32177e-07	0.00469629	3.06295e-07	0.00154311	-0.000104248	-0.661613	-3.50283e-05	-0.222309	1.51268e-06	0.00776093	4.92986e-07	0.00252931	9.72076e-07	0.00522687	3.15845e-07	0.0016983	1.96947e-07	0.00173974	6.56204e-08	0.000579661
8700	26	1.27866e-07	0.00118746	4.24478e-08	0.000394205	9.4247e-07	0.00470566	3.09677e-07	0.00154618	-0.000104166	-0.662655	-3.5001e-05	-0.222659	1.50989e-06	0.00777604	4.92076e-07	0.00253423	9.74701e-07	0.00523659	3.16698e-07	0.00170146	2.05045e-07	0.00174175	6.83187e-08	0.000580331
8710	26	1.27479e-07	0.00118874	4.23197e-08	0.000394629	9.4716e-07	0.00471511	3.11218e-07	0.00154929	-0.000104078	-0.663696	-3.49712e-05	-0.223009	1.50898e-06	0.00779112	4.91779e-07	0.00253915	9.80386e-07	0.00524639	3.18545e-07	0.00170465	2.1037e-07	0.00174381	7.00928e-08	0.000581018
8720	26	1.37655e-07	0.00119006	4.56975e-08	0.000395067	9.55069e-07	0.0047246	3.13817e-07	0.00155241	-0.000103997	-0.664737	-3.4944e-05	-0.223358	1.51423e-06	0.00780621	4.93492e-07	0.00254407	9.81136e-07	0.00525621	3.18789e-07	0.00170784	2.21061e-07	0.00174598	7.36552e-08	0.00058174
8730	26	1.38221e-07	0.00119146	4.58856e-08	0.00039553	9.43912e-07	0.00473413	3.1015e-07	0.00155554	-0.0001039	-0.665776	-3.49115e-05	-0.223708	1.52212e-06	0.00782138	4.96064e-07	0.00254901	9.77035e-07	0.00526602	3.17456e-07	0.00171102	2.07454e-07	0.0017481	6.91215e-08	0.000582447
8740	26	1.32877e-07	0.00119281	4.41113e-08	0.000395979	9.42583e-07	0.00474354	3.09714e-07	0.00155863	-0.000103813	-0.666815	-3.48821e-05	-0.224057	1.53161e-06	0.00783666	4.99156e-07	0.00255399	9.77209e-07	0.00527578	3.17513e-07	0.0017142	1.9712e-07	0.00175012	6.56783e-08	0.000583122
8750	26	1.38258e-07	0.00119416	4.58979e-08	0.000396427	9.57789e-07	0.00475304	3.1471e-07	0.00156175	-0.000103727	-0.667852	-3.48535e-05	-0.224405	1.52606e-06	0.00785196	4.97347e-07	0.00255897	9.80322e-07	0.00528557	3.18524e-07	0.00171738	1.83068e-07	0.00175202	6.09961e-08	0.000583754
8760	26	1.28796e-07	0.00119549	4.27568e-08	0.00039687	9.56178e-07	0.00476261	3.14181e-07	0.0015649	-0.000103643	-0.668889	-3.48252e-05	-0.224754	1.52452e-06	0.00786719	4.96847e-07	0.00256394	9.74561e-07	0.00529536	3.16652e-07	0.00172056	1.78389e-07	0.00175384	5.94373e-08	0.000584358
8770	26	1.42303e-07	0.00119682	4.72406e-08	0.000397311	9.52175e-07	0.00477216	3.12865e-07	0.00156804	-0.000103553	-0.669925	-3.47949e-05	-0.225102	1.53123e-06	0.00788247	4.99031e-07	0.00256892	9.80371e-07	0.00530512	3.1854e-07	0.00172373	1.73656e-07	0.0017556	5.78604e-08	0.000584947
8780	26	1.39214e-07	0.00119822	4.62152e-08	0.000397776	9.65279e-07	0.00478175	3.17171e-07	0.00157119	-0.000103468	-0.67096	-3.47663e-05	-0.22545	1.53667e-06	0.00789783	5.00806e-07	0.00257393	9.83344e-07	0.00531495	3.19506e-07	0.00172692	1.81034e-07	0.00175737	6.03185e-08	0.000585535
8790	26	1.40199e-07	0.00119963	4.65423e-08	0.000398242	9.63942e-07	0.00479141	3.16732e-07	0.00157436	-0.000103366	-0.671995	-3.47319e-05	-0.225797	1.52747e-06	0.00791315	4.97807e-07	0.00257892	9.81012e-07	0.00532477	3.18748e-07	0.00173011	1.95467e-07	0.00175925	6.51275e-08	0.000586163
8800	26	1.26496e-07	0.00120096	4.19931e-08	0.000398684	9.67568e-07	0.00480105	3.17923e-07	0.00157753	-0.000103281	-0.673028	-3.47035e-05	-0.226144	1.51881e-06	0.00792836	4.94985e-07	0.00258388	9.86472e-07	0.0053346	3.20522e-07	0.00173331	2.00161e-07	0.00176123	6.66913e-08	0.000586824
8810	26	1.20738e-07	0.00120219	4.00817e-08	0.000399095	9.67123e-07	0.00481076	3.17777e-07	0.00158072	-0.0001032	-0.67406	-3.46763e-05	-0.226491	1.52768e-06	0.00794359	4.97875e-07	0.00258884	9.94107e-07	0.00534451	3.23003e-07	0.00173653	2.02098e-07	0.00176324	6.73369e-08	0.000587492
8820	26	1.13776e-07	0.00120336	3.77704e-08	0.000399484	9.62119e-07	0.00482041	3.16133e-07	0.00158389	-0.000103118	-0.675092	-3.46486e-05	-0.226838	1.53835e-06	0.00795893	5.01351e-07	0.00259384	1.00874e-06	0.00535454	3.27758e-07	0.00173978	2.08052e-07	0.0017653	6.93205e-08	0.000588179
8830	26	1.04799e-07	0.00120444	3.47903e-08	0.000399842	9.66214e-07	0.00483005	3.17479e-07	0.00158706	-0.000103019	-0.676122	-3.46156e-05	-0.227184	1.52835e-06	0.00797428	4.98092e-07	0.00259884	1.01982e-06	0.00536469	3.31357e-07	0.00174308	2.12838e-07	0.00176739	7.09152e-08	0.000588876
8840	26	1.15855e-07	0.00120554	3.84606e-08	0.000400207	9.72096e-07	0.00483973	3.19411e-07	0.00159024	-0.000102936	-0.677152	-3.45875e-05	-0.22753	1.52173e-06	0.00798951	4.95935e-07	0.0026038	1.0253e-06	0.0053749	3.33137e-07	0.0017464	2.19764e-07	0.00176957	7.32229e-08	0.000589602
8850	26	1.1986e-07	0.00120673	3.97902e-08	0.000400601	9.81534e-07	0.00484952	3.22512e-07	0.00159345	-0.000102853	-0.678181	-3.45598e-05	-0.227876	1.50349e-06	0.00800464	4.89992e-07	0.00260873	1.03305e-06	0.00538518	3.35657e-07	0.00174974	2.17534e-07	0.00177174	7.248e-08	0.000590325
8860	26	1.08356e-07	0.00120787	3.59713e-08	0.000400981	9.78632e-07	0.00485932	3.21559e-07	0.00159667	-0.000102768	-0.679209	-3.45311e-05	-0.228221	1.4842e-06	0.00801957	4.83705e-07	0.0026136	1.02897e-06	0.00539549	3.3433e-07	0.00175309	2.24065e-07	0.00177395	7.46561e-08	0.000591061
8870	26	1.0772e-07	0.00120894	3.57601e-08	0.000401335	9.85341e-07	0.00486914	3.23763e-07	0.0015999	-0.000102696	-0.680237	-3.45068e-05	-0.228566	1.48272e-06	0.0080344	4.83222e-07	0.00261843	1.02869e-06	0.00540578	3.34238e-07	0.00175644	2.22023e-07	0.00177618	7.39757e-08	0.000591805
8880	26	1.10711e-07	0.00121004	3.6753e-08	0.000401699	9.79552e-07	0.00487897	3.21861e-07	0.00160313	-0.000102617	-0.681263	-3.44803e-05	-0.228911	1.48292e-06	0.00804923	4.83288e-07	0.00262327	1.0305e-06	0.00541608	3.34828e-07	0.00175978	2.16542e-07	0.00177837	7.21493e-08	0.000592535
8890	26	1.10712e-07	0.00121114	3.67532e-08	0.000402066	9.89174e-07	0.0048888	3.25023e-07	0.00160636	-0.000102541	-0.682289	-3.4455e-05	-0.229256	1.48705e-06	0.00806407	4.84635e-07	0.0026281	1.03488e-06	0.0054264	3.36251e-07	0.00176313	2.17817e-07	0.00178056	7.25741e-08	0.000593261
8900	26	1.12979e-07	0.00121226	3.7506e-08	0.000402437	9.81569e-07	0.00489865	3.22524e-07	0.0016096	-0.000102473	-0.683314	-3.44319e-05	-0.229601	1.48039e-06	0.00807891	4.82463e-07	0.00263294	1.03228e-06	0.00543674	3.35406e-07	0.00176649	2.13111e-07	0.0017827	7.10063e-08	0.000593977
8910	26	1.08504e-07	0.00121337	3.60202e-08	0.000402806	9.84884e-07	0.00490848	3.23613e-07	0.00161283	-0.000102394	-0.684338	-3.44054e-05	-0.229945	1.46723e-06	0.00809365	4.78173e-07	0.00263774	1.02262e-06	0.00544701	3.32267e-07	0.00176983	2.17607e-07	0.00178485	7.25042e-08	0.000594693
8920	26	1.03848e-07	0.00121443	3.44747e-08	0.000403156	9.948e-07	0.00491838	3.26871e-07	0.00161608	-0.000102312	-0.685362	-3.4378e-05	-0.230289	1.47103e-06	0.00810834	4.79414e-07	0.00264253	1.01759e-06	0.0054572	3.30634e-07	0.00177314	2.2925e-07	0.0017871	7.63835e-08	0.000595443
8930	26	1.24296e-07	0.00121556	4.12627e-08	0.000403531	1.00155e-06	0.00492837	3.2909e-07	0.00161936	-0.000102241	-0.686385	-3.4354e-05	-0.230632	1.46507e-06	0.00812302	4.77469e-07	0.00264732	1.01529e-06	0.00546737	3.29885e-07	0.00177645	2.26991e-07	0.00178937	7.56307e-08	0.000596199
8940	26	1.30991e-07	0.00121685	4.34852e-08	0.000403959	1.00607e-06	0.00493839	3.30576e-07	0.00162266	-0.000102158	-0.687407	-3.43263e-05	-0.230976	1.46178e-06	0.00813766	4.76399e-07	0.00265209	1.01905e-06	0.00547752	3.31107e-07	0.00177975	2.41266e-07	0.00179172	8.0387e-08	0.000596981
8950	26	1.26117e-07	0.00121814	4.18674e-08	0.000404387	1.00795e-06	0.00494847	3.31191e-07	0.00162597	-0.000102083	-0.688428	-3.4301e-05	-0.231319	1.4481e-06	0.00815223	4.7194e-07	0.00265683	1.0365e-06	0.0054878	3.36779e-07	0.00178308	2.51228e-07	0.00179419	8.37065e-08	0.000597803
8960	26	1.42538e-07	0.00121949	4.73186e-08	0.000404837	1.01655e-06	0.00495859	3.34017e-07	0.00162929	-0.000102025	-0.689448	-3.42813e-05	-0.231662	1.44017e-06	0.00816667	4.69356e-07	0.00266154	1.03991e-06	0.00549819	3.37886e-07	0.00178646	2.56283e-07	0.00179673	8.53907e-08	0.000598652
8970	26	1.58314e-07	0.00122099	5.25558e-08	0.000405335	1.01394e-06	0.00496875	3.33159e-07	0.00163263	-0.000101962	-0.690468	-3.42604e-05	-0.232004	1.44651e-06	0.00818109	4.71421e-07	0.00266624	1.03982e-06	0.00550859	3.37857e-07	0.00178984	2.40251e-07	0.00179922	8.0049e-08	0.000599481
8980	26	1.69489e-07	0.00122262	5.62656e-08	0.000405877	1.00068e-06	0.00497882	3.28805e-07	0.00163594	-0.000101893	-0.691488	-3.42371e-05	-0.232347	1.45554e-06	0.0081956	4.74366e-07	0.00267097	1.03609e-06	0.00551897	3.36644e-07	0.00179321	2.37908e-07	0.00180162	7.92683e-08	0.00060028
8990	26	1.76442e-07	0.00122438	5.8574e-08	0.000406459	1.00369e-06	0.00498884	3.29792e-07	0.00163923	-0.000101827	-0.692506	-3.42148e-05	-0.232689	1.46106e-06	0.0082102	4.76163e-07	0.00267573	1.03142e-06	0.0055293	3.35127e-07	0.00179657	2.36953e-07	0.001804	7.895e-08	0.000601071
9000	26	1.74319e-07	0.00122612	5.78689e-08	0.000407036	1.00673e-06	0.00499891	3.30791e-07	0.00164254	-0.000101745	-0.693524	-3.41872e-05	-0.233031	1.45603e-06	0.00822478	4.74525e-07	0.00268048	1.02861e-06	0.00553961	3.34213e-07	0.00179992	2.21707e-07	0.00180627	7.38704e-08	0.00060183
9010	26	1.81673e-07	0.00122789	6.03104e-08	0.000407626	1.0055e-06	0.00500897	3.30386e-07	0.00164585	-0.000101671	-0.694541	-3.41625e-05	-0.233373	1.45324e-06	0.00823932	4.73615e-07	0.00268522	1.02782e-06	0.00554989	3.33959e-07	0.00180326	2.30276e-07	0.00180853	7.67253e-08	0.000602583
9020	26	1.84378e-07	0.00122973	6.12085e-08	0.000408236	1.01261e-06	0.00501905	3.32722e-07	0.00164916	-0.000101604	-0.695558	-3.414e-05	-0.233714	1.44993e-06	0.00825385	4.72536e-07	0.00268995	1.02474e-06	0.00556016	3.32956e-07	0.0018066	2.31594e-07	0.00181084	7.71646e-08	0.000603352
9030	26	1.83538e-07	0.00123157	6.09295e-08	0.000408847	1.0252e-06	0.00502925	3.36861e-07	0.00165251	-0.000101543	-0.696573	-3.41194e-05	-0.234056	1.46129e-06	0.00826841	4.76238e-07	0.0026947	1.01329e-06	0.00557034	3.29237e-07	0.0018099	2.25956e-07	0.00181312	7.52859e-08	0.000604113
9040	26	1.79533e-07	0.00123339	5.95999e-08	0.000409451	1.01548e-06	0.00503947	3.33667e-07	0.00165587	-0.000101475	-0.697588	-3.40967e-05	-0.234397	1.46565e-06	0.00828305	4.7766e-07	0.00269947	1.02811e-06	0.00558053	3.34051e-07	0.00181322	2.20528e-07	0.00181536	7.34775e-08	0.000604859
9050	26	1.72077e-07	0.00123514	5.71248e-08	0.000410034	1.00939e-06	0.00504958	3.31666e-07	0.00165919	-0.000101405	-0.698603	-3.40732e-05	-0.234738	1.46449e-06	0.00829771	4.7728e-07	0.00270425	1.04734e-06	0.00559092	3.40301e-07	0.00181659	2.36904e-07	0.00181765	7.89339e-08	0.00060562
9060	26	1.81237e-07	0.00123689	6.01656e-08	0.000410614	1.0142e-06	0.0050597	3.33246e-07	0.00166251	-0.000101339	-0.699617	-3.40509e-05	-0.235078	1.46344e-06	0.00831233	4.76939e-07	0.00270901	1.04846e-06	0.00560141	3.40664e-07	0.00182	2.42496e-07	0.00182006	8.07971e-08	0.000606424
9070	26	1.81202e-07	0.00123872	6.01541e-08	0.000411221	1.01821e-06	0.00506985	3.34563e-07	0.00166585	-0.000101271	-0.70063	-3.40282e-05	-0.235419	1.47743e-06	0.00832706	4.815e-07	0.00271381	1.05755e-06	0.00561194	3.43616e-07	0.00182342	2.41645e-07	0.00182249	8.05134e-08	0.000607233
9080	26	1.74982e-07	0.00124049	5.80892e-08	0.00041181	1.01532e-06	0.00508001	3.33613e-07	0.00166919	-0.000101214	-0.701642	-3.40088e-05	-0.235759	1.47135e-06	0.0083418	4.79516e-07	0.00271861	1.05172e-06	0.0056225	3.41722e-07	0.00182685	2.32378e-07	0.00182485	7.74258e-08	0.000608021
9090	26	1.69066e-07	0.00124221	5.61253e-08	0.000412379	1.01374e-06	0.00509016	3.33095e-07	0.00167252	-0.000101162	-0.702654	-3.39914e-05	-0.236099	1.46517e-06	0.00835648	4.77502e-07	0.0027234	1.03959e-06	0.00563295	3.37781e-07	0.00183025	2.30411e-07	0.00182716	7.67704e-08	0.00060879
9100	26	1.68112e-07	0.00124389	5.58085e-08	0.000412939	9.98769e-07	0.00510023	3.28175e-07	0.00167583	-0.000101112	-0.703665	-3.39745e-05	-0.236439	1.46152e-06	0.00837111	4.76313e-07	0.00272817	1.03373e-06	0.00564331	3.35876e-07	0.00183361	2.39091e-07	0.0018295	7.96625e-08	0.00060957
9110	26	1.67305e-07	0.00124557	5.55406e-08	0.000413495	9.84137e-07	0.00511014	3.23368e-07	0.00167909	-0.000101049	-0.704676	-3.39536e-05	-0.236778	1.47009e-06	0.00838576	4.79107e-07	0.00273294	1.03361e-06	0.00565365	3.3584e-07	0.00183697	2.28784e-07	0.00183184	7.62284e-08	0.00061035
9120	26	1.66511e-07	0.00124723	5.52769e-08	0.000414046	9.9197e-07	0.00512001	3.25941e-07	0.00168233	-0.00010099	-0.705686	-3.39336e-05	-0.237118	1.47019e-06	0.00840046	4.79138e-07	0.00273773	1.02493e-06	0.00566395	3.33019e-07	0.00184032	2.26777e-07	0.00183411	7.55596e-08	0.000611106
9130	26	1.63235e-07	0.00124889	5.41895e-08	0.000414597	1.0083e-06	0.00513001	3.31307e-07	0.00168562	-0.000100936	-0.706696	-3.39154e-05	-0.237457	1.46194e-06	0.00841513	4.7645e-07	0.00274251	1.02999e-06	0.00567421	3.34663e-07	0.00184365	2.29508e-07	0.00183642	7.64695e-08	0.000611874
9140	26	1.56441e-07	0.00125049	5.19341e-08	0.000415126	1.01495e-06	0.00514013	3.33493e-07	0.00168894	-0.000100883	-0.707705	-3.38976e-05	-0.237796	1.46292e-06	0.00842976	4.76768e-07	0.00274728	1.04395e-06	0.00568459	3.39198e-07	0.00184703	2.1653e-07	0.00183863	7.21454e-08	0.000612611
9150	26	1.50775e-07	0.00125202	5.00532e-08	0.000415637	1.00972e-06	0.00515026	3.31775e-07	0.00169227	-0.000100818	-0.708713	-3.3876e-05	-0.238135	1.46415e-06	0.00844439	4.7717e-07	0.00275205	1.03047e-06	0.00569499	3.34819e-07	0.0018504	2.19568e-07	0.00184081	7.31575e-08	0.000613337
9160	26	1.49708e-07	0.00125352	4.9699e-08	0.000416133	1.01863e-06	0.0051604	3.34703e-07	0.0016956	-0.000100732	-0.709721	-3.38471e-05	-0.238474	1.46704e-06	0.00845904	4.78112e-07	0.00275682	1.02646e-06	0.00570525	3.33516e-07	0.00185374	2.26549e-07	0.00184304	7.54836e-08	0.00061408
9170	26	1.57091e-07	0.00125506	5.21499e-08	0.000416646	1.01998e-06	0.00517061	3.35144e-07	0.00169896	-0.000100664	-0.710728	-3.38241e-05	-0.238812	1.46085e-06	0.00847372	4.76097e-07	0.00276161	1.04917e-06	0.00571561	3.40895e-07	0.00185711	2.20551e-07	0.00184529	7.3485e-08	0.000614829
9180	26	1.42091e-07	0.00125655	4.71701e-08	0.00041714	1.01951e-06	0.00518081	3.3499e-07	0.00170231	-0.000100604	-0.711735	-3.38039e-05	-0.23915	1.47279e-06	0.00848838	4.79986e-07	0.00276639	1.05812e-06	0.00572614	3.43804e-07	0.00186053	2.26647e-07	0.00184753	7.55162e-08	0.000615576
9190	26	1.37304e-07	0.00125794	4.5581e-08	0.000417602	1.02138e-06	0.00519099	3.35606e-07	0.00170565	-0.000100542	-0.71274	-3.37832e-05	-0.239488	1.48723e-06	0.00850318	4.84693e-07	0.00277121	1.06677e-06	0.00573676	3.46612e-07	0.00186398	2.32759e-07	0.00184981	7.75528e-08	0.000616337
9200	26	1.52401e-07	0.00125939	5.05929e-08	0.000418082	1.02525e-06	0.00520125	3.36878e-07	0.00170902	-0.000100479	-0.713745	-3.3762e-05	-0.239826	1.48235e-06	0.00851802	4.83103e-07	0.00277605	1.0679e-06	0.00574743	3.46981e-07	0.00186744	2.43135e-07	0.00185219	8.101e-08	0.000617129
9210	26	1.54618e-07	0.00126094	5.13289e-08	0.000418599	1.0226e-06	0.00521148	3.36004e-07	0.00171239	-0.00010039	-0.71475	-3.37321e-05	-0.240163	1.46814e-06	0.00853275	4.78469e-07	0.00278085	1.06095e-06	0.00575807	3.44723e-07	0.0018709	2.52112e-07	0.00185467	8.40008e-08	0.000617956
9220	26	1.48152e-07	0.00126247	4.91823e-08	0.000419105	1.02153e-06	0.00522168	3.35655e-07	0.00171574	-0.00010032	-0.715753	-3.37086e-05	-0.2405	1.48031e-06	0.00854745	4.82437e-07	0.00278564	1.06082e-06	0.00576869	3.44678e-07	0.00187435	2.52729e-07	0.0018572	8.42067e-08	0.0006188
9230	26	1.45979e-07	0.00126393	4.84611e-08	0.000419589	1.00943e-06	0.00523185	3.3168e-07	0.00171908	-0.000100268	-0.716756	-3.3691e-05	-0.240837	1.49674e-06	0.00856236	4.87793e-07	0.0027905	1.0601e-06	0.00577929	3.44445e-07	0.0018778	2.45222e-07	0.00185969	8.17053e-08	0.000619629
9240	26	1.5887e-07	0.00126544	5.27404e-08	0.000420091	1.00439e-06	0.00524191	3.30021e-07	0.00172239	-0.000100217	-0.717759	-3.3674e-05	-0.241174	1.5014e-06	0.00857734	4.8931e-07	0.00279538	1.05091e-06	0.00578986	3.41458e-07	0.00188123	2.39184e-07	0.00186211	7.96935e-08	0.000620434
9250	26	1.45402e-07	0.00126697	4.82696e-08	0.000420598	1.01401e-06	0.005252	3.33182e-07	0.0017257	-0.000100151	-0.71876	-3.36516e-05	-0.241511	1.49971e-06	0.00859235	4.88759e-07	0.00280027	1.05188e-06	0.00580037	3.41774e-07	0.00188464	2.48628e-07	0.00186457	8.284e-08	0.000621255
9260	26	1.33815e-07	0.00126836	4.4423e-08	0.000421059	1.01493e-06	0.00526214	3.33486e-07	0.00172903	-0.000100091	-0.719762	-3.36317e-05	-0.241847	1.49383e-06	0.00860734	4.86842e-07	0.00280515	1.03952e-06	0.00581082	3.37759e-07	0.00188804	2.4664e-07	0.00186704	8.21778e-08	0.000622076
9270	26	1.23199e-07	0.00126965	4.08987e-08	0.000421488	1.01934e-06	0.00527232	3.34933e-07	0.00173238	-0.000100029	-0.720762	-3.36108e-05	-0.242183	1.47688e-06	0.00862217	4.81319e-07	0.00280999	1.03444e-06	0.0058212	3.36107e-07	0.00189141	2.64145e-07	0.0018696	8.80102e-08	0.00062293
9280	26	1.18507e-07	0.00127085	3.9341e-08	0.000421887	1.02092e-06	0.00528252	3.35454e-07	0.00173573	-9.99774e-05	-0.721762	-3.35934e-05	-0.242519	1.47223e-06	0.00863692	4.79805e-07	0.0028148	1.03465e-06	0.00583154	3.36177e-07	0.00189477	2.54228e-07	0.00187221	8.47061e-08	0.000623799
9290	26	1.19704e-07	0.00127204	3.97384e-08	0.000422283	1.011e-06	0.00529268	3.32195e-07	0.00173907	-9.99158e-05	-0.722762	-3.35727e-05	-0.242855	1.47764e-06	0.00865164	4.81566e-07	0.00281959	1.03796e-06	0.0058419	3.3725e-07	0.00189814	2.41791e-07	0.00187468	8.05622e-08	0.000624624
9300	26	1.07053e-07	0.00127318	3.55387e-08	0.00042266	1.0145e-06	0.00530281	3.33345e-07	0.0017424	-9.98551e-05	-0.723761	-3.35523e-05	-0.243191	1.48645e-06	0.00866647	4.84438e-07	0.00282443	1.04404e-06	0.00585231	3.39229e-07	0.00190152	2.48698e-07	0.00187714	8.28633e-08	0.000625443
9310	26	1.02821e-07	0.00127421	3.41337e-08	0.000423003	1.00832e-06	0.00531293	3.31314e-07	0.00174572	-9.97959e-05	-0.724759	-3.35325e-05	-0.243526	1.49932e-06	0.00868139	4.88632e-07	0.00282929	1.05481e-06	0.00586281	3.42727e-07	0.00190493	2.66886e-07	0.00187971	8.89234e-08	0.000626297
9320	26	1.1052e-07	0.00127529	3.66896e-08	0.00042336	1.00613e-06	0.00532299	3.30594e-07	0.00174903	-9.97377e-05	-0.725757	-3.35129e-05	-0.243862	1.49264e-06	0.00869635	4.86456e-07	0.00283417	1.05392e-06	0.00587336	3.42438e-07	0.00190836	2.66272e-07	0.00188239	8.87188e-08	0.000627191
9330	26	1.07857e-07	0.00127638	3.58054e-08	0.000423723	1.00402e-06	0.00533305	3.299e-07	0.00175233	-9.96785e-05	-0.726754	-3.3493e-05	-0.244197	1.50011e-06	0.00871131	4.88889e-07	0.00283904	1.05368e-06	0.0058839	3.4236e-07	0.00191178	2.51335e-07	0.00188497	8.37421e-08	0.000628052
9340	26	1.1617e-07	0.00127748	3.85652e-08	0.000424088	9.9948e-07	0.00534306	3.28409e-07	0.00175562	-9.96211e-05	-0.72775	-3.34737e-05	-0.244531	1.50415e-06	0.00872634	4.90206e-07	0.00284394	1.05066e-06	0.00589441	3.41379e-07	0.0019152	2.5562e-07	0.00188749	8.51697e-08	0.00062889
9350	26	1.07652e-07	0.00127862	3.57375e-08	0.000424467	9.97988e-07	0.00535306	3.27919e-07	0.00175891	-9.95599e-05	-0.728746	-3.34531e-05	-0.244866	1.50095e-06	0.00874138	4.89165e-07	0.00284884	1.05858e-06	0.00590496	3.43952e-07	0.00191863	2.52742e-07	0.00189005	8.42107e-08	0.000629745
9360	26	1.04824e-07	0.00127969	3.47988e-08	0.000424822	9.98283e-07	0.00536302	3.28016e-07	0.00176218	-9.94983e-05	-0.729741	-3.34324e-05	-0.245201	1.49863e-06	0.00875638	4.88406e-07	0.00285373	1.06401e-06	0.00591557	3.45717e-07	0.00192207	2.48605e-07	0.00189257	8.28324e-08	0.000630583
9370	26	1.0588e-07	0.00128074	3.51492e-08	0.00042517	1.0042e-06	0.00537304	3.2996e-07	0.00176547	-9.9439e-05	-0.730736	-3.34125e-05	-0.245535	1.50533e-06	0.00877139	4.90592e-07	0.00285862	1.07193e-06	0.00592625	3.48291e-07	0.00192554	2.4214e-07	0.001895	8.06784e-08	0.000631395
9380	26	1.14412e-07	0.00128184	3.79815e-08	0.000425535	1.00067e-06	0.00538306	3.28799e-07	0.00176876	-9.93789e-05	-0.73173	-3.33923e-05	-0.245869	1.50494e-06	0.00878644	4.90464e-07	0.00286353	1.07207e-06	0.00593697	3.48333e-07	0.00192903	2.5572e-07	0.00189751	8.5203e-08	0.000632229
9390	26	1.2261e-07	0.00128302	4.0703e-08	0.000425926	1.0048e-06	0.00539309	3.30158e-07	0.00177206	-9.93236e-05	-0.732724	-3.33737e-05	-0.246203	1.50375e-06	0.00880148	4.90076e-07	0.00286843	1.0709e-06	0.00594769	3.47954e-07	0.00193251	2.49558e-07	0.00190005	8.315e-08	0.000633075
9400	26	1.11491e-07	0.00128419	3.70118e-08	0.000426315	1.01791e-06	0.00540321	3.34466e-07	0.00177539	-9.92704e-05	-0.733717	-3.33559e-05	-0.246536	1.50493e-06	0.00881653	4.90461e-07	0.00287333	1.05749e-06	0.00595835	3.43598e-07	0.00193597	2.4451e-07	0.00190251	8.1468e-08	0.000633894
9410	26	1.12484e-07	0.0012853	3.73416e-08	0.000426683	1.01585e-06	0.00541338	3.33789e-07	0.00177873	-9.91992e-05	-0.734709	-3.33319e-05	-0.24687	1.49589e-06	0.00883154	4.87515e-07	0.00287822	1.06001e-06	0.00596893	3.44417e-07	0.00193941	2.56945e-07	0.00190501	8.56113e-08	0.000634728
9420	26	1.15717e-07	0.00128645	3.84149e-08	0.000427066	1.02702e-06	0.0054236	3.3746e-07	0.00178209	-9.91417e-05	-0.735701	-3.33126e-05	-0.247203	1.51628e-06	0.00884661	4.9416e-07	0.00288313	1.0586e-06	0.00597953	3.43958e-07	0.00194286	2.64431e-07	0.0019076	8.81053e-08	0.000635591
9430	26	1.23177e-07	0.00128763	4.08912e-08	0.000427457	1.02002e-06	0.00543382	3.35159e-07	0.00178545	-9.90821e-05	-0.736692	-3.32926e-05	-0.247536	1.52734e-06	0.00886181	4.97766e-07	0.00288809	1.07173e-06	0.00599016	3.48224e-07	0.00194631	2.78166e-07	0.00191032	9.26818e-08	0.000636498
9440	26	1.39437e-07	0.00128893	4.62892e-08	0.00042789	1.02737e-06	0.00544406	3.37573e-07	0.00178881	-9.902e-05	-0.737682	-3.32717e-05	-0.247869	1.53714e-06	0.00887713	5.0096e-07	0.00289308	1.06749e-06	0.00600088	3.46847e-07	0.00194979	2.73803e-07	0.00191308	9.12281e-08	0.000637418
9450	26	1.43641e-07	0.00129035	4.76847e-08	0.000428361	1.02907e-06	0.00545435	3.38132e-07	0.00179219	-9.89452e-05	-0.738672	-3.32466e-05	-0.248201	1.53017e-06	0.00889247	4.98687e-07	0.00289808	1.07148e-06	0.00601157	3.48142e-07	0.00195327	2.76981e-07	0.00191584	9.22871e-08	0.000638336
9460	26	1.46574e-07	0.0012918	4.86586e-08	0.000428843	1.03076e-06	0.00546464	3.38688e-07	0.00179557	-9.88794e-05	-0.739661	-3.32245e-05	-0.248534	1.53166e-06	0.00890777	4.99173e-07	0.00290307	1.0821e-06	0.00602235	3.51595e-07	0.00195677	2.67923e-07	0.00191857	8.9269e-08	0.000639248
9470	26	1.38067e-07	0.00129321	4.58344e-08	0.000429311	1.03517e-06	0.00547493	3.40137e-07	0.00179895	-9.8807e-05	-0.74065	-3.32002e-05	-0.248866	1.52136e-06	0.00892305	4.95815e-07	0.00290805	1.07277e-06	0.00603312	3.48561e-07	0.00196027	2.76849e-07	0.00192129	9.2243e-08	0.000640153
9480	26	1.50891e-07	0.00129465	5.00917e-08	0.000429789	1.05736e-06	0.00548543	3.47427e-07	0.0018024	-9.87512e-05	-0.741637	-3.31814e-05	-0.249198	1.52827e-06	0.0089383	4.98069e-07	0.00291302	1.08816e-06	0.00604394	3.53564e-07	0.00196378	2.90496e-07	0.00192415	9.67899e-08	0.000641106
9490	26	1.64613e-07	0.00129625	5.4647e-08	0.000430318	1.05198e-06	0.00549598	3.45659e-07	0.00180587	-9.869e-05	-0.742625	-3.31608e-05	-0.249529	1.54392e-06	0.00895365	5.03168e-07	0.00291802	1.07607e-06	0.00605478	3.49633e-07	0.00196731	3.01329e-07	0.00192712	1.004e-07	0.000642094
9500	26	1.53836e-07	0.00129784	5.10694e-08	0.000430846	1.04581e-06	0.00550646	3.43633e-07	0.00180931	-9.86196e-05	-0.743611	-3.31372e-05	-0.249861	1.5464e-06	0.00896909	5.03976e-07	0.00292305	1.06403e-06	0.00606547	3.45722e-07	0.00197078	3.0169e-07	0.0019301	1.0052e-07	0.000643088
9510	26	1.78685e-07	0.00129948	5.93185e-08	0.000431391	1.06344e-06	0.005517	3.49423e-07	0.00181278	-9.85528e-05	-0.744597	-3.31147e-05	-0.250192	1.55253e-06	0.00898461	5.05974e-07	0.00292811	1.07059e-06	0.00607614	3.47855e-07	0.00197425	3.17071e-07	0.0019332	1.05645e-07	0.000644121
9520	26	1.85425e-07	0.00130133	6.15559e-08	0.000432007	1.06141e-06	0.00552765	3.48757e-07	0.00181627	-9.84894e-05	-0.745582	-3.30934e-05	-0.250523	1.55043e-06	0.00900013	5.05288e-07	0.00293317	1.093e-06	0.00608693	3.55135e-07	0.00197775	3.10585e-07	0.00193634	1.03484e-07	0.000645167
9530	26	1.85689e-07	0.0013032	6.16435e-08	0.000432626	1.06232e-06	0.00553826	3.49057e-07	0.00181976	-9.84334e-05	-0.746567	-3.30746e-05	-0.250854	1.53743e-06	0.00901552	5.01054e-07	0.00293818	1.10797e-06	0.00609795	3.59998e-07	0.00198133	3.15835e-07	0.00193944	1.05233e-07	0.0006462
9540	26	1.87413e-07	0.00130506	6.22158e-08	0.000433243	1.0629e-06	0.00554888	3.49249e-07	0.00182325	-9.83644e-05	-0.747551	-3.30514e-05	-0.251185	1.53369e-06	0.00903088	4.99833e-07	0.00294319	1.11292e-06	0.00610907	3.61606e-07	0.00198495	3.31983e-07	0.00194269	1.10613e-07	0.000647283
9550	26	1.89748e-07	0.00130695	6.29909e-08	0.000433871	1.06449e-06	0.00555952	3.49768e-07	0.00182675	-9.83043e-05	-0.748534	-3.30313e-05	-0.251515	1.54085e-06	0.00904624	5.02169e-07	0.0029482	1.09782e-06	0.00612012	3.56702e-07	0.00198854	3.38423e-07	0.00194603	1.12759e-07	0.000648396
9560	26	1.88096e-07	0.00130884	6.24428e-08	0.000434499	1.06118e-06	0.00557017	3.48681e-07	0.00183025	-9.82517e-05	-0.749517	-3.30136e-05	-0.251845	1.55294e-06	0.00906171	5.06106e-07	0.00295324	1.0983e-06	0.00613109	3.56859e-07	0.0019921	3.38691e-07	0.00194944	1.12848e-07	0.000649531
9570	26	1.878e-07	0.00131072	6.23444e-08	0.000435124	1.06181e-06	0.00558076	3.4889e-07	0.00183373	-9.81976e-05	-0.750499	-3.29954e-05	-0.252175	1.56919e-06	0.00907733	5.11404e-07	0.00295833	1.10972e-06	0.00614212	3.60568e-07	0.00199569	3.23011e-07	0.00195275	1.07624e-07	0.000650634
9580	26	1.83469e-07	0.00131258	6.09067e-08	0.000435742	1.07019e-06	0.00559144	3.51644e-07	0.00183723	-9.81397e-05	-0.751481	-3.29759e-05	-0.252505	1.58505e-06	0.0090931	5.16573e-07	0.00296347	1.12504e-06	0.0061533	3.65545e-07	0.00199932	3.25006e-07	0.00195597	1.08288e-07	0.000651709
9590	26	1.77594e-07	0.00131439	5.89564e-08	0.000436342	1.074e-06	0.00560215	3.52895e-07	0.00184075	-9.80707e-05	-0.752462	-3.29527e-05	-0.252835	1.58097e-06	0.00910893	5.15243e-07	0.00296863	1.11804e-06	0.00616453	3.63271e-07	0.00200297	3.20415e-07	0.0019592	1.06759e-07	0.000652783
9600	26	1.63752e-07	0.00131611	5.4361e-08	0.000436911	1.07834e-06	0.00561293	3.5432e-07	0.00184429	-9.80012e-05	-0.753442	-3.29294e-05	-0.253164	1.57958e-06	0.00912473	5.14788e-07	0.00297377	1.11635e-06	0.00617569	3.62724e-07	0.00200659	3.21808e-07	0.00196241	1.07223e-07	0.000653852
9610	26	1.60633e-07	0.00131773	5.33258e-08	0.00043745	1.07172e-06	0.00562368	3.52145e-07	0.00184783	-9.79324e-05	-0.754422	-3.29063e-05	-0.253493	1.58413e-06	0.00914056	5.16273e-07	0.00297893	1.12117e-06	0.00618688	3.64287e-07	0.00201023	3.22054e-07	0.00196562	1.07305e-07	0.000654924
9620	26	1.49611e-07	0.00131929	4.96667e-08	0.000437967	1.06548e-06	0.00563439	3.50095e-07	0.00185135	-9.78649e-05	-0.755401	-3.28836e-05	-0.253822	1.59491e-06	0.00915644	5.19786e-07	0.00298411	1.12927e-06	0.00619813	3.66922e-07	0.00201389	3.12638e-07	0.00196881	1.04168e-07	0.000655987
9630	26	1.43169e-07	0.00132073	4.75283e-08	0.000438447	1.06234e-06	0.00564502	3.49064e-07	0.00185484	-9.7801e-05	-0.756379	-3.28621e-05	-0.254151	1.60897e-06	0.00917246	5.24367e-07	0.00298933	1.12768e-06	0.00620943	3.66403e-07	0.00201755	2.96869e-07	0.00197185	9.89134e-08	0.000656998
9640	26	1.43727e-07	0.00132218	4.77133e-08	0.000438926	1.07138e-06	0.00565569	3.52033e-07	0.00185835	-9.77346e-05	-0.757357	-3.28398e-05	-0.25448	1.60027e-06	0.00918852	5.21532e-07	0.00299456	1.12434e-06	0.00622068	3.65318e-07	0.00202121	3.03716e-07	0.00197484	1.01195e-07	0.000657993
9650	26	1.36451e-07	0.00132358	4.5298e-08	0.000439391	1.07386e-06	0.00566643	3.52849e-07	0.00186188	-9.7662e-05	-0.758334	-3.28154e-05	-0.254808	1.60334e-06	0.00920452	5.22533e-07	0.00299978	1.12976e-06	0.00623194	3.67078e-07	0.00202487	3.07683e-07	0.00197792	1.02517e-07	0.000659019
9660	26	1.2977e-07	0.00132491	4.308e-08	0.000439833	1.07632e-06	0.00567718	3.53657e-07	0.00186541	-9.76078e-05	-0.75931	-3.27972e-05	-0.255136	1.60893e-06	0.00922059	5.24355e-07	0.00300502	1.13931e-06	0.00624328	3.70182e-07	0.00202855	3.1095e-07	0.00198099	1.03605e-07	0.000660045
9670	26	1.38841e-07	0.00132624	4.60915e-08	0.000440274	1.08501e-06	0.00568798	3.56513e-07	0.00186896	-9.75429e-05	-0.760286	-3.27754e-05	-0.255464	1.62003e-06	0.00923672	5.27973e-07	0.00301027	1.14843e-06	0.00625472	3.73145e-07	0.00203227	3.18798e-07	0.00198415	1.0622e-07	0.000661096
9680	26	1.49969e-07	0.00132765	4.97855e-08	0.000440744	1.0963e-06	0.00569889	3.60221e-07	0.00187254	-9.74785e-05	-0.761261	-3.27538e-05	-0.255792	1.64108e-06	0.00925302	5.34833e-07	0.00301558	1.15799e-06	0.00626627	3.76253e-07	0.00203602	3.29921e-07	0.0019874	1.09926e-07	0.000662179
9690	26	1.69898e-07	0.00132927	5.64014e-08	0.00044128	1.11097e-06	0.00570993	3.65043e-07	0.00187617	-9.74179e-05	-0.762236	-3.27334e-05	-0.256119	1.65054e-06	0.00926949	5.37915e-07	0.00302095	1.16024e-06	0.00627784	3.76984e-07	0.00203978	3.31706e-07	0.00199071	1.10521e-07	0.000663281
9700	26	1.67097e-07	0.00133095	5.54715e-08	0.00044184	1.10953e-06	0.00572104	3.6457e-07	0.00187982	-9.73456e-05	-0.763209	-3.27091e-05	-0.256446	1.64797e-06	0.00928598	5.37079e-07	0.00302633	1.16413e-06	0.00628947	3.78246e-07	0.00204356	3.23941e-07	0.00199398	1.07934e-07	0.000664373
9710	26	1.65345e-07	0.00133262	5.489e-08	0.000442392	1.10935e-06	0.00573214	3.64512e-07	0.00188346	-9.72833e-05	-0.764183	-3.26882e-05	-0.256773	1.65126e-06	0.00930246	5.38149e-07	0.0030317	1.16234e-06	0.00630109	3.77666e-07	0.00204734	3.29502e-07	0.00199724	1.09787e-07	0.00066546
9720	26	1.73179e-07	0.00133429	5.74907e-08	0.000442948	1.1033e-06	0.00574321	3.62524e-07	0.0018871	-9.72303e-05	-0.765155	-3.26704e-05	-0.2571	1.66332e-06	0.00931903	5.42081e-07	0.0030371	1.16038e-06	0.0063127	3.77029e-07	0.00205111	3.27628e-07	0.00200055	1.09162e-07	0.00066656
9730	26	1.86593e-07	0.00133611	6.19436e-08	0.00044355	1.09355e-06	0.00575418	3.59318e-07	0.00189071	-9.71759e-05	-0.766127	-3.26521e-05	-0.257427	1.66083e-06	0.00933566	5.41268e-07	0.00304252	1.17588e-06	0.00632438	3.82064e-07	0.0020549	3.2291e-07	0.00200378	1.0759e-07	0.000667638
9740	26	1.88599e-07	0.00133798	6.26096e-08	0.000444172	1.10312e-06	0.00576516	3.62462e-07	0.00189431	-9.71241e-05	-0.767099	-3.26347e-05	-0.257753	1.66732e-06	0.00935228	5.43385e-07	0.00304793	1.19394e-06	0.00633623	3.87931e-07	0.00205876	3.46339e-07	0.00200711	1.15396e-07	0.000668748
9750	26	1.85937e-07	0.00133984	6.17258e-08	0.00044479	1.10209e-06	0.00577618	3.62126e-07	0.00189794	-9.7048e-05	-0.76807	-3.26091e-05	-0.258079	1.67735e-06	0.00936902	5.46652e-07	0.00305339	1.1935e-06	0.00634817	3.87788e-07	0.00206263	3.58459e-07	0.00201065	1.19435e-07	0.000669927
9760	26	1.96103e-07	0.00134173	6.51009e-08	0.000445416	1.11232e-06	0.00578724	3.65485e-07	0.00190157	-9.69797e-05	-0.76904	-3.25862e-05	-0.258405	1.66935e-06	0.00938576	5.44046e-07	0.00305885	1.18989e-06	0.00636008	3.86615e-07	0.00206651	3.47395e-07	0.00201423	1.15748e-07	0.00067112
9770	26	1.99211e-07	0.00134372	6.61326e-08	0.000446076	1.11247e-06	0.00579838	3.65537e-07	0.00190523	-9.69174e-05	-0.770009	-3.25652e-05	-0.258731	1.67583e-06	0.00940249	5.46159e-07	0.0030643	1.19642e-06	0.00637203	3.88739e-07	0.00207039	3.41113e-07	0.00201765	1.13655e-07	0.00067226
9780	26	1.96688e-07	0.00134569	6.52949e-08	0.000446732	1.10312e-06	0.00580945	3.62464e-07	0.00190887	-9.68619e-05	-0.770978	-3.25466e-05	-0.259057	1.69185e-06	0.00941932	5.51379e-07	0.00306978	1.20292e-06	0.00638402	3.90851e-07	0.00207428	3.40614e-07	0.00202106	1.13489e-07	0.000673395
9790	26	1.95803e-07	0.00134765	6.50011e-08	0.000447384	1.10134e-06	0.00582048	3.61879e-07	0.00191249	-9.68022e-05	-0.771946	-3.25265e-05	-0.259382	1.69965e-06	0.00943629	5.53922e-07	0.00307531	1.19873e-06	0.00639603	3.89488e-07	0.00207819	3.4693e-07	0.00202451	1.15593e-07	0.000674544
9800	26	2.16805e-07	0.00134975	7.19732e-08	0.000448079	1.09144e-06	0.00583144	3.58626e-07	0.00191609	-9.67358e-05	-0.772914	-3.25042e-05	-0.259707	1.69183e-06	0.00945325	5.51371e-07	0.00308084	1.18482e-06	0.00640798	3.8497e-07	0.00208207	3.44794e-07	0.00202797	1.14881e-07	0.000675698
9810	26	2.1813e-07	0.00135192	7.24129e-08	0.000448798	1.09422e-06	0.00584236	3.5954e-07	0.00191968	-9.66702e-05	-0.773881	-3.24822e-05	-0.260032	1.68795e-06	0.00947014	5.50108e-07	0.00308634	1.17518e-06	0.00641976	3.81837e-07	0.00208589	3.39023e-07	0.00203137	1.12959e-07	0.00067683
9820	26	2.31409e-07	0.00135416	7.68214e-08	0.000449544	1.09625e-06	0.00585331	3.60204e-07	0.00192328	-9.66106e-05	-0.774848	-3.24622e-05	-0.260357	1.70095e-06	0.00948709	5.54344e-07	0.00309187	1.19071e-06	0.00643159	3.86883e-07	0.00208974	3.42487e-07	0.00203478	1.14113e-07	0.000677966
9830	26	2.49495e-07	0.00135656	8.28256e-08	0.00045034	1.09822e-06	0.00586429	3.60853e-07	0.00192689	-9.65518e-05	-0.775813	-3.24424e-05	-0.260681	1.70626e-06	0.00950414	5.56076e-07	0.00309742	1.19717e-06	0.00644352	3.88984e-07	0.00209362	3.38642e-07	0.00203819	1.12832e-07	0.000679102
9840	26	2.48952e-07	0.00135907	8.26451e-08	0.000451173	1.10762e-06	0.00587531	3.63943e-07	0.00193051	-9.64935e-05	-0.776779	-3.24228e-05	-0.261006	1.71144e-06	0.00952122	5.57762e-07	0.00310299	1.19885e-06	0.00645551	3.89527e-07	0.00209751	3.44729e-07	0.0020416	1.1486e-07	0.000680237
9850	26	2.39397e-07	0.00136151	7.9473e-08	0.000451983	1.1167e-06	0.00588645	3.66925e-07	0.00193417	-9.64404e-05	-0.777743	-3.2405e-05	-0.26133	1.69787e-06	0.00953828	5.53339e-07	0.00310855	1.20042e-06	0.0064675	3.90038e-07	0.00210141	3.52869e-07	0.00204509	1.17572e-07	0.000681403
9860	26	2.32782e-07	0.00136387	7.7277e-08	0.000452765	1.12511e-06	0.00589763	3.69687e-07	0.00193784	-9.63726e-05	-0.778707	-3.23822e-05	-0.261654	1.70963e-06	0.00955531	5.57172e-07	0.0031141	1.20584e-06	0.00647953	3.918e-07	0.00210532	3.45504e-07	0.00204859	1.15118e-07	0.000682567
9870	26	2.23451e-07	0.00136613	7.41795e-08	0.000453516	1.14713e-06	0.00590899	3.76923e-07	0.00194158	-9.63258e-05	-0.779671	-3.23665e-05	-0.261977	1.72068e-06	0.00957246	5.60775e-07	0.00311969	1.21167e-06	0.00649163	3.93694e-07	0.00210925	3.51949e-07	0.00205207	1.17266e-07	0.000683726
9880	26	2.35837e-07	0.00136842	7.82915e-08	0.000454279	1.14556e-06	0.00592047	3.76407e-07	0.00194535	-9.62775e-05	-0.780634	-3.23502e-05	-0.262301	1.72232e-06	0.00958969	5.61308e-07	0.00312531	1.20932e-06	0.00650372	3.92929e-07	0.00211317	3.47131e-07	0.00205555	1.1566e-07	0.000684888
9890	26	2.37125e-07	0.00137082	7.87189e-08	0.000455075	1.12921e-06	0.00593185	3.71036e-07	0.00194909	-9.62103e-05	-0.781596	-3.23276e-05	-0.262624	1.7238e-06	0.00960691	5.61791e-07	0.00313092	1.21563e-06	0.00651586	3.9498e-07	0.00211712	3.48056e-07	0.00205904	1.15968e-07	0.00068605
9900	26	2.12356e-07	0.00137306	7.04962e-08	0.000455819	1.11549e-06	0.00594305	3.66527e-07	0.00195277	-9.61503e-05	-0.782558	-3.23075e-05	-0.262947	1.73038e-06	0.00962419	5.63937e-07	0.00313655	1.21401e-06	0.00652801	3.94454e-07	0.00212107	3.56074e-07	0.00206256	1.1864e-07	0.000687221
9910	26	2.06733e-07	0.00137513	6.86298e-08	0.000456506	1.11983e-06	0.00595423	3.67955e-07	0.00195644	-9.60969e-05	-0.783519	-3.22895e-05	-0.26327	1.73063e-06	0.00964148	5.64019e-07	0.00314219	1.20829e-06	0.00654012	3.92596e-07	0.002125	3.56077e-07	0.00206614	1.18641e-07	0.000688414
9920	26	2.03229e-07	0.0013772	6.74663e-08	0.000457191	1.12574e-06	0.00596547	3.69894e-07	0.00196013	-9.6051e-05	-0.78448	-3.22741e-05	-0.263593	1.73034e-06	0.0096588	5.63921e-07	0.00314783	1.21295e-06	0.00655221	3.9411e-07	0.00212893	3.66979e-07	0.00206975	1.22273e-07	0.000689619
9930	26	1.9595e-07	0.00137918	6.50499e-08	0.00045785	1.14173e-06	0.0059768	3.7515e-07	0.00196386	-9.59835e-05	-0.78544	-3.22514e-05	-0.263916	1.72568e-06	0.00967605	5.62404e-07	0.00315345	1.21652e-06	0.00656437	3.95269e-07	0.00213288	3.70783e-07	0.00207345	1.23541e-07	0.000690852
9940	26	1.93144e-07	0.00138114	6.41185e-08	0.000458501	1.13759e-06	0.00598821	3.73788e-07	0.00196761	-9.59321e-05	-0.7864	-3.22342e-05	-0.264238	1.72474e-06	0.00969331	5.62098e-07	0.00315908	1.19633e-06	0.00657645	3.88709e-07	0.00213681	3.60579e-07	0.0020771	1.20141e-07	0.000692067
9950	26	1.90355e-07	0.00138305	6.31927e-08	0.000459133	1.12698e-06	0.00599953	3.70304e-07	0.00197133	-9.58782e-05	-0.787359	-3.2216e-05	-0.264561	1.70032e-06	0.00971045	5.5414e-07	0.00316466	1.19004e-06	0.00658836	3.86665e-07	0.00214068	3.51698e-07	0.00208066	1.17182e-07	0.000693251
9960	26	1.95926e-07	0.00138498	6.50418e-08	0.000459776	1.12878e-06	0.0060108	3.70895e-07	0.00197503	-9.58221e-05	-0.788317	-3.21972e-05	-0.264883	1.69741e-06	0.00972742	5.5319e-07	0.00317019	1.19531e-06	0.00660029	3.88378e-07	0.00214455	3.64687e-07	0.00208422	1.2151e-07	0.000694441
9970	26	2.03468e-07	0.00138697	6.75456e-08	0.000460435	1.14337e-06	0.00602216	3.75687e-07	0.00197876	-9.57684e-05	-0.789275	-3.21792e-05	-0.265205	1.6994e-06	0.0097444	5.53839e-07	0.00317573	1.19636e-06	0.00661226	3.88718e-07	0.00214844	3.76749e-07	0.00208795	1.25529e-07	0.000695683
9980	26	1.86814e-07	0.00138893	6.2017e-08	0.000461085	1.14519e-06	0.00603361	3.76286e-07	0.00198252	-9.57179e-05	-0.790233	-3.21622e-05	-0.265526	1.70589e-06	0.00976144	5.55956e-07	0.00318128	1.19615e-06	0.00662422	3.8865e-07	0.00215233	3.75681e-07	0.0020917	1.25173e-07	0.000696931
9990	26	1.77128e-07	0.00139074	5.88015e-08	0.000461686	1.14024e-06	0.00604505	3.74659e-07	0.00198628	-9.56713e-05	-0.79119	-3.21465e-05	-0.265848	1.69942e-06	0.00977848	5.53847e-07	0.00318683	1.20625e-06	0.00663625	3.91933e-07	0.00215624	3.82294e-07	0.00209549	1.27376e-07	0.000698193
10000	26	1.8456e-07	0.00139255	6.12688e-08	0.000462289	1.14499e-06	0.00605647	3.76221e-07	0.00199003	-9.56213e-05	-0.792146	-3.21297e-05	-0.266169	1.69251e-06	0.00979543	5.51592e-07	0.00319236	1.2036e-06	0.00664829	3.91072e-07	0.00216015	3.79559e-07	0.0020993	1.26465e-07	0.000699464
10010	26	1.84447e-07	0.00139439	6.12313e-08	0.000462899	1.14512e-06	0.00606793	3.76263e-07	0.0019938	-9.55547e-05	-0.793102	-3.21074e-05	-0.26649	1.69438e-06	0.00981237	5.52204e-07	0.00319788	1.19746e-06	0.0066603	3.89077e-07	0.00216405	3.75935e-07	0.00210307	1.25257e-07	0.000700721
10020	26	1.92896e-07	0.00139628	6.4036e-08	0.000463526	1.13771e-06	0.00607933	3.7383e-07	0.00199755	-9.5484e-05	-0.794057	-3.20836e-05	-0.266811	1.68548e-06	0.00982927	5.49302e-07	0.00320339	1.19408e-06	0.00667226	3.87979e-07	0.00216794	3.77408e-07	0.00210684	1.25748e-07	0.000701977
10030	26	1.95022e-07	0.00139821	6.4742e-08	0.000464166	1.14475e-06	0.00609075	3.76142e-07	0.0020013	-9.54383e-05	-0.795012	-3.20683e-05	-0.267132	1.69175e-06	0.00984615	5.51344e-07	0.00320889	1.19244e-06	0.00668418	3.87446e-07	0.00217181	3.72193e-07	0.0021106	1.24011e-07	0.000703229
10040	26	2.16531e-07	0.00140024	7.18824e-08	0.000464841	1.14362e-06	0.00610219	3.7577e-07	0.00200506	-9.53871e-05	-0.795966	-3.2051e-05	-0.267453	1.7078e-06	0.00986316	5.56578e-07	0.00321443	1.19422e-06	0.00669611	3.88023e-07	0.00217569	3.69061e-07	0.0021143	1.22967e-07	0.000704463
10050	26	2.21718e-07	0.00140245	7.36041e-08	0.000465573	1.11957e-06	0.00611349	3.67867e-07	0.00200877	-9.53307e-05	-0.79692	-3.20321e-05	-0.267773	1.71319e-06	0.00988027	5.58332e-07	0.00322001	1.16451e-06	0.00670791	3.78371e-07	0.00217952	3.83747e-07	0.00211809	1.2786e-07	0.000705723
10060	26	2.15812e-07	0.00140463	7.16437e-08	0.000466299	1.11809e-06	0.00612467	3.67382e-07	0.00201244	-9.52817e-05	-0.797873	-3.20156e-05	-0.268093	1.70848e-06	0.00989738	5.56797e-07	0.00322558	1.18042e-06	0.00671964	3.8354e-07	0.00218333	3.71007e-07	0.00212187	1.23615e-07	0.000706983
10070	26	2.01091e-07	0.00140673	6.67568e-08	0.000466996	1.12609e-06	0.00613588	3.70009e-07	0.00201613	-9.52242e-05	-0.798825	-3.19963e-05	-0.268413	1.69717e-06	0.00991442	5.53111e-07	0.00323114	1.17927e-06	0.00673146	3.83164e-07	0.00218717	3.53475e-07	0.00212549	1.17774e-07	0.000708191
10080	26	1.98443e-07	0.00140873	6.58776e-08	0.000467659	1.13515e-06	0.00614719	3.72989e-07	0.00201984	-9.51718e-05	-0.799777	-3.19787e-05	-0.268733	1.71332e-06	0.00993147	5.58375e-07	0.00323669	1.15947e-06	0.00674316	3.76732e-07	0.00219097	3.50728e-07	0.00212901	1.16859e-07	0.000709363
10090	26	1.87489e-07	0.00141067	6.22411e-08	0.000468303	1.13334e-06	0.0061585	3.72391e-07	0.00202356	-9.51146e-05	-0.800729	-3.19595e-05	-0.269053	1.72633e-06	0.00994868	5.62614e-07	0.0032423	1.15838e-06	0.00675471	3.76377e-07	0.00219473	3.51624e-07	0.00213252	1.17157e-07	0.000710531
10100	26	1.83207e-07	0.00141251	6.08196e-08	0.000468915	1.13512e-06	0.00616984	3.72979e-07	0.00202729	-9.50551e-05	-0.801679	-3.19395e-05	-0.269372	1.72733e-06	0.00996594	5.62942e-07	0.00324793	1.16258e-06	0.00676634	3.77742e-07	0.00219851	3.46822e-07	0.00213602	1.15557e-07	0.000711697
10110	26	1.78505e-07	0.00141432	5.92586e-08	0.000469516	1.13438e-06	0.00618119	3.72736e-07	0.00203102	-9.49906e-05	-0.80263	-3.19178e-05	-0.269692	1.73883e-06	0.0099833	5.6669e-07	0.00325358	1.16988e-06	0.00677804	3.80114e-07	0.00220231	3.58421e-07	0.00213952	1.19422e-07	0.000712866
10120	26	1.84783e-07	0.00141614	6.1343e-08	0.000470118	1.13021e-06	0.00619253	3.71364e-07	0.00203474	-9.49312e-05	-0.803579	-3.18979e-05	-0.270011	1.74166e-06	0.0100007	5.67612e-07	0.00325925	1.16535e-06	0.00678971	3.78644e-07	0.0022061	3.55254e-07	0.00214308	1.18367e-07	0.000714052
10130	26	1.74648e-07	0.00141795	5.79784e-08	0.000470722	1.12428e-06	0.00620377	3.69415e-07	0.00203843	-9.4885e-05	-0.804528	-3.18823e-05	-0.27033	1.74703e-06	0.0100182	5.6936e-07	0.00326495	1.16845e-06	0.00680138	3.79649e-07	0.00220989	3.51501e-07	0.00214663	1.17116e-07	0.000715234
10140	26	1.63022e-07	0.00141963	5.41187e-08	0.000471279	1.12992e-06	0.00621505	3.7127e-07	0.00204214	-9.48377e-05	-0.805477	-3.18664e-05	-0.270648	1.73306e-06	0.0100356	5.6481e-07	0.00327061	1.16881e-06	0.00681306	3.79768e-07	0.00221369	3.43757e-07	0.00215009	1.14536e-07	0.000716388
10150	26	1.66273e-07	0.00142127	5.51979e-08	0.000471821	1.12355e-06	0.00622632	3.69177e-07	0.00204584	-9.47867e-05	-0.806425	-3.18493e-05	-0.270967	1.73878e-06	0.0100529	5.66673e-07	0.00327626	1.16953e-06	0.00682475	3.80003e-07	0.00221748	3.42322e-07	0.00215354	1.14058e-07	0.000717537
10160	26	1.50768e-07	0.00142287	5.00509e-08	0.000472352	1.11705e-06	0.00623753	3.67041e-07	0.00204953	-9.47246e-05	-0.807373	-3.18284e-05	-0.271285	1.7301e-06	0.0100702	5.63844e-07	0.00328192	1.16629e-06	0.00683643	3.7895e-07	0.00222128	3.40846e-07	0.00215696	1.13566e-07	0.000718674
10170	26	1.47526e-07	0.00142435	4.89746e-08	0.000472845	1.12217e-06	0.00624873	3.68723e-07	0.00205321	-9.46793e-05	-0.80832	-3.18132e-05	-0.271604	1.72547e-06	0.0100875	5.62337e-07	0.00328755	1.16066e-06	0.00684807	3.77118e-07	0.00222506	3.43848e-07	0.00216038	1.14566e-07	0.000719815
10180	26	1.39892e-07	0.0014258	4.64403e-08	0.000473326	1.10999e-06	0.0062599	3.6472e-07	0.00205688	-9.46347e-05	-0.809266	-3.17982e-05	-0.271922	1.72645e-06	0.0101048	5.62656e-07	0.00329317	1.15436e-06	0.00685964	3.75073e-07	0.00222882	3.38645e-07	0.0021638	1.12833e-07	0.000720955
10190	26	1.49342e-07	0.00142722	4.95773e-08	0.000473797	1.10494e-06	0.00627097	3.63062e-07	0.00206051	-9.4583e-05	-0.810212	-3.17809e-05	-0.27224	1.72808e-06	0.010122	5.63186e-07	0.0032988	1.151e-06	0.00687115	3.7398e-07	0.00223256	3.27352e-07	0.00216712	1.0907e-07	0.000722062
10200	26	1.53626e-07	0.00142875	5.09995e-08	0.000474306	1.10033e-06	0.00628201	3.61547e-07	0.00206414	-9.45296e-05	-0.811158	-3.17629e-05	-0.272557	1.72223e-06	0.0101393	5.61279e-07	0.00330442	1.15223e-06	0.00688267	3.7438e-07	0.0022363	3.17785e-07	0.00217034	1.05883e-07	0.000723134
10210	26	1.48663e-07	0.00143027	4.93519e-08	0.00047481	1.10758e-06	0.00629305	3.63929e-07	0.00206777	-9.44649e-05	-0.812103	-3.17412e-05	-0.272875	1.73097e-06	0.0101565	5.64129e-07	0.00331005	1.157e-06	0.00689422	3.75929e-07	0.00224006	3.22156e-07	0.00217353	1.07339e-07	0.000724197
10220	26	1.41804e-07	0.00143171	4.70751e-08	0.000475288	1.1137e-06	0.00630416	3.65939e-07	0.00207142	-9.44035e-05	-0.813047	-3.17205e-05	-0.273192	1.73585e-06	0.0101739	5.65718e-07	0.0033157	1.14996e-06	0.00690576	3.73643e-07	0.00224381	3.31638e-07	0.0021768	1.10498e-07	0.000725287
10230	26	1.41395e-07	0.00143312	4.69393e-08	0.000475756	1.11089e-06	0.00631528	3.65015e-07	0.00207507	-9.43419e-05	-0.813991	-3.16998e-05	-0.273509	1.73191e-06	0.0101912	5.64434e-07	0.00332134	1.14065e-06	0.00691722	3.70616e-07	0.00224753	3.42778e-07	0.00218019	1.1421e-07	0.000726414
10240	26	1.28697e-07	0.00143449	4.2724e-08	0.000476212	1.10116e-06	0.00632633	3.61819e-07	0.0020787	-9.42846e-05	-0.814934	-3.16806e-05	-0.273826	1.74048e-06	0.0102086	5.67227e-07	0.00332701	1.12622e-06	0.00692854	3.65928e-07	0.00225121	3.30529e-07	0.00218356	1.10129e-07	0.000727537
10250	26	1.27289e-07	0.00143575	4.22566e-08	0.00047663	1.10281e-06	0.00633734	3.62362e-07	0.00208232	-9.42364e-05	-0.815877	-3.16644e-05	-0.274143	1.73219e-06	0.010226	5.64525e-07	0.00333267	1.11894e-06	0.00693977	3.63563e-07	0.00225486	3.04531e-07	0.00218675	1.01466e-07	0.0007286
10260	26	1.42452e-07	0.00143711	4.729e-08	0.00047708	1.11463e-06	0.00634843	3.66244e-07	0.00208597	-9.41922e-05	-0.816819	-3.16495e-05	-0.274459	1.72787e-06	0.0102433	5.63117e-07	0.00333831	1.12168e-06	0.00695096	3.64453e-07	0.00225849	3.02759e-07	0.00218973	1.00876e-07	0.000729595
10270	26	1.52896e-07	0.00143858	5.07573e-08	0.00047757	1.11682e-06	0.00635958	3.66965e-07	0.00208963	-9.41327e-05	-0.81776	-3.16296e-05	-0.274776	1.71782e-06	0.0102605	5.59844e-07	0.00334392	1.12871e-06	0.00696219	3.66739e-07	0.00226214	3.0247e-07	0.00219277	1.0078e-07	0.000730606
10280	26	1.65938e-07	0.00144018	5.50867e-08	0.000478099	1.13354e-06	0.00637083	3.72458e-07	0.00209333	-9.40788e-05	-0.818701	-3.16114e-05	-0.275092	1.71654e-06	0.0102777	5.59425e-07	0.00334952	1.14093e-06	0.00697357	3.7071e-07	0.00226584	3.21466e-07	0.00219588	1.07109e-07	0.000731642
10290	26	1.75226e-07	0.00144189	5.817e-08	0.000478667	1.1437e-06	0.00638225	3.75796e-07	0.00209708	-9.40206e-05	-0.819642	-3.15919e-05	-0.275408	1.71425e-06	0.0102948	5.58678e-07	0.00335511	1.15038e-06	0.00698502	3.73779e-07	0.00226956	3.25243e-07	0.00219913	1.08367e-07	0.000732726
10300	26	1.79673e-07	0.00144368	5.96466e-08	0.000479262	1.12788e-06	0.00639361	3.70599e-07	0.00210081	-9.39693e-05	-0.820582	-3.15747e-05	-0.275724	1.71708e-06	0.010312	5.59601e-07	0.0033607	1.14583e-06	0.00699651	3.72299e-07	0.00227329	3.23319e-07	0.00220236	1.07726e-07	0.000733803
10310	26	1.70296e-07	0.00144543	5.65334e-08	0.000479842	1.11976e-06	0.00640483	3.67932e-07	0.0021045	-9.39091e-05	-0.821521	-3.15544e-05	-0.27604	1.7193e-06	0.0103292	5.60326e-07	0.0033663	1.1476e-06	0.00700797	3.72877e-07	0.00227701	3.19727e-07	0.0022056	1.06529e-07	0.00073488
10320	26	1.78691e-07	0.00144718	5.93204e-08	0.000480424	1.12441e-06	0.00641606	3.6946e-07	0.00210819	-9.38567e-05	-0.82246	-3.15368e-05	-0.276355	1.73415e-06	0.0103464	5.65164e-07	0.00337193	1.14351e-06	0.0070194	3.71545e-07	0.00228073	3.08656e-07	0.00220875	1.02841e-07	0.000735932
10330	26	1.77632e-07	0.00144896	5.89688e-08	0.000481016	1.1279e-06	0.00642731	3.70607e-07	0.00211189	-9.38132e-05	-0.823398	-3.15222e-05	-0.27667	1.72421e-06	0.0103637	5.61924e-07	0.00337757	1.1537e-06	0.00703091	3.74856e-07	0.00228447	3.06653e-07	0.00221182	1.02174e-07	0.000736952
10340	26	1.71575e-07	0.00145072	5.69583e-08	0.000481598	1.12767e-06	0.00643861	3.70528e-07	0.0021156	-9.37589e-05	-0.824336	-3.1504e-05	-0.276985	1.70863e-06	0.0103809	5.56848e-07	0.00338316	1.16941e-06	0.00704252	3.79964e-07	0.00228824	2.98802e-07	0.00221484	9.95575e-08	0.00073796
10350	26	1.68115e-07	0.00145245	5.58095e-08	0.000482172	1.10868e-06	0.0064498	3.64288e-07	0.00211927	-9.36989e-05	-0.825274	-3.14838e-05	-0.2773	1.71599e-06	0.010398	5.59244e-07	0.00338874	1.16806e-06	0.00705424	3.79523e-07	0.00229205	2.95432e-07	0.0022178	9.84347e-08	0.000738947
10360	26	1.35178e-07	0.00145394	4.48753e-08	0.000482666	1.11645e-06	0.00646093	3.66845e-07	0.00212293	-9.36358e-05	-0.82621	-3.14626e-05	-0.277615	1.72236e-06	0.0104152	5.61322e-07	0.00339434	1.16575e-06	0.00706588	3.78774e-07	0.00229583	2.83622e-07	0.00222068	9.44996e-08	0.000739907
10370	26	1.27087e-07	0.00145524	4.21894e-08	0.000483099	1.12557e-06	0.00647213	3.69839e-07	0.00212661	-9.35816e-05	-0.827146	-3.14444e-05	-0.27793	1.72651e-06	0.0104325	5.62675e-07	0.00339997	1.17813e-06	0.0070776	3.82797e-07	0.00229964	2.73818e-07	0.00222348	9.12332e-08	0.000740839
10380	26	1.37267e-07	0.00145654	4.55687e-08	0.00048353	1.12953e-06	0.00648341	3.71142e-07	0.00213032	-9.35302e-05	-0.828082	-3.14271e-05	-0.278244	1.731e-06	0.0104497	5.64139e-07	0.0034056	1.18452e-06	0.00708943	3.84873e-07	0.00230348	2.72203e-07	0.00222621	9.0695e-08	0.00074175
10390	26	1.46202e-07	0.00145796	4.85352e-08	0.000484003	1.11755e-06	0.00649466	3.67205e-07	0.00213401	-9.34683e-05	-0.829017	-3.14063e-05	-0.278558	1.72053e-06	0.010467	5.60725e-07	0.00341123	1.18298e-06	0.00710126	3.8437e-07	0.00230733	2.70868e-07	0.00222893	9.02503e-08	0.000742655
10400	26	1.51238e-07	0.00145945	5.02067e-08	0.000484498	1.11748e-06	0.00650582	3.67182e-07	0.00213768	-9.34203e-05	-0.829951	-3.13902e-05	-0.278872	1.71464e-06	0.0104842	5.58807e-07	0.00341682	1.18885e-06	0.00711313	3.86279e-07	0.00231119	2.72039e-07	0.00223164	9.06405e-08	0.000743557
10410	26	1.52576e-07	0.00146096	5.06509e-08	0.000484998	1.121e-06	0.00651701	3.68338e-07	0.00214136	-9.33707e-05	-0.830885	-3.13735e-05	-0.279186	1.7183e-06	0.0105013	5.59999e-07	0.00342241	1.17065e-06	0.00712494	3.80364e-07	0.00231502	2.67782e-07	0.00223435	8.92219e-08	0.000744461
10420	26	1.74084e-07	0.0014626	5.77909e-08	0.000485543	1.11617e-06	0.00652817	3.66751e-07	0.00214502	-9.33282e-05	-0.831819	-3.13592e-05	-0.2795	1.733e-06	0.0105186	5.6479e-07	0.00342804	1.19018e-06	0.00713674	3.8671e-07	0.00231886	2.7217e-07	0.00223704	9.06841e-08	0.000745358
10430	26	1.76814e-07	0.00146437	5.86973e-08	0.00048613	1.11707e-06	0.00653932	3.67047e-07	0.00214869	-9.32795e-05	-0.832752	-3.13429e-05	-0.279813	1.73798e-06	0.0105359	5.66411e-07	0.0034337	1.18691e-06	0.00714863	3.85649e-07	0.00232272	2.79163e-07	0.00223979	9.3014e-08	0.000746275
10440	26	1.67912e-07	0.0014661	5.57422e-08	0.000486704	1.12558e-06	0.00655055	3.69842e-07	0.00215238	-9.3222e-05	-0.833684	-3.13235e-05	-0.280126	1.73621e-06	0.0105533	5.65837e-07	0.00343936	1.1892e-06	0.00716051	3.86393e-07	0.00232658	2.79846e-07	0.0022426	9.32417e-08	0.000747211
10450	26	1.79143e-07	0.00146783	5.94707e-08	0.000487278	1.13224e-06	0.00656182	3.7203e-07	0.00215608	-9.31532e-05	-0.834616	-3.13004e-05	-0.28044	1.73113e-06	0.0105707	5.6418e-07	0.003445	1.18375e-06	0.00717238	3.84621e-07	0.00233043	2.76205e-07	0.00224538	9.20285e-08	0.000748135
10460	26	1.85524e-07	0.00146964	6.15888e-08	0.00048788	1.13752e-06	0.00657318	3.73765e-07	0.00215982	-9.31129e-05	-0.835548	-3.12869e-05	-0.280753	1.73696e-06	0.010588	5.66081e-07	0.00345066	1.18728e-06	0.00718423	3.8577e-07	0.00233429	2.71688e-07	0.00224812	9.05235e-08	0.000749049
10470	26	1.93264e-07	0.00147155	6.41584e-08	0.000488512	1.14054e-06	0.00658456	3.74759e-07	0.00216355	-9.30731e-05	-0.836478	-3.12735e-05	-0.281065	1.72873e-06	0.0106053	5.63399e-07	0.00345631	1.18119e-06	0.00719607	3.8379e-07	0.00233813	2.70284e-07	0.00225082	9.00558e-08	0.000749948
10480	26	2.02379e-07	0.00147353	6.71842e-08	0.000489171	1.14545e-06	0.00659601	3.76372e-07	0.00216732	-9.30338e-05	-0.837409	-3.12603e-05	-0.281378	1.72626e-06	0.0106226	5.62592e-07	0.00346193	1.1785e-06	0.00720788	3.82915e-07	0.00234197	2.64112e-07	0.00225349	8.79991e-08	0.000750838
10490	26	2.11372e-07	0.00147561	7.01697e-08	0.000489861	1.14732e-06	0.00660746	3.76985e-07	0.00217108	-9.29846e-05	-0.838339	-3.12438e-05	-0.281691	1.73574e-06	0.0106399	5.65684e-07	0.00346757	1.17639e-06	0.00721965	3.82229e-07	0.00234579	2.58445e-07	0.0022561	8.61111e-08	0.000751706
10500	26	2.06609e-07	0.0014777	6.85886e-08	0.000490554	1.14048e-06	0.0066189	3.7474e-07	0.00217484	-9.29453e-05	-0.839269	-3.12306e-05	-0.282003	1.74105e-06	0.0106573	5.67413e-07	0.00347324	1.18137e-06	0.00723143	3.83849e-07	0.00234962	2.73812e-07	0.00225874	9.12313e-08	0.000752589
10510	26	2.25032e-07	0.00147984	7.47043e-08	0.000491265	1.12382e-06	0.00663024	3.69264e-07	0.00217856	-9.28847e-05	-0.840198	-3.12102e-05	-0.282315	1.72677e-06	0.0106746	5.6276e-07	0.0034789	1.18051e-06	0.00724325	3.83568e-07	0.00235346	2.95004e-07	0.00226159	9.8292e-08	0.000753538
10520	26	2.12807e-07	0.00148203	7.06461e-08	0.000491994	1.13443e-06	0.00664154	3.72752e-07	0.00218228	-9.28342e-05	-0.841126	-3.11932e-05	-0.282627	1.72977e-06	0.0106919	5.63736e-07	0.00348453	1.17636e-06	0.00725506	3.8222e-07	0.0023573	3.05693e-07	0.00226462	1.01853e-07	0.000754547
10530	26	2.0956e-07	0.00148416	6.9568e-08	0.000492698	1.13906e-06	0.00665291	3.74272e-07	0.00218601	-9.27972e-05	-0.842055	-3.11808e-05	-0.282939	1.71436e-06	0.0107092	5.58713e-07	0.00349015	1.16569e-06	0.00726677	3.78754e-07	0.0023611	2.99605e-07	0.00226764	9.9825e-08	0.000755552
10540	26	1.95848e-07	0.00148619	6.5016e-08	0.000493373	1.13714e-06	0.00666431	3.73641e-07	0.00218976	-9.27419e-05	-0.842982	-3.11622e-05	-0.283251	1.72256e-06	0.0107263	5.61387e-07	0.00349574	1.14117e-06	0.0072783	3.70787e-07	0.00236485	2.99092e-07	0.00227062	9.96541e-08	0.000756547
10550	26	2.06007e-07	0.0014882	6.83888e-08	0.000494041	1.13348e-06	0.00667566	3.72439e-07	0.00219349	-9.2691e-05	-0.84391	-3.11451e-05	-0.283562	1.72425e-06	0.0107435	5.61939e-07	0.00350135	1.14049e-06	0.0072897	3.70565e-07	0.00236855	2.98252e-07	0.00227362	9.93743e-08	0.000757546
10560	26	1.99611e-07	0.00149023	6.62652e-08	0.000494715	1.12525e-06	0.00668696	3.69733e-07	0.0021972	-9.26442e-05	-0.844836	-3.11294e-05	-0.283874	1.73036e-06	0.0107608	5.63929e-07	0.00350698	1.13935e-06	0.0073011	3.70196e-07	0.00237226	2.82817e-07	0.00227653	9.42315e-08	0.000758514
10570	26	1.93691e-07	0.0014922	6.43001e-08	0.00049537	1.1221e-06	0.00669818	3.68701e-07	0.00220089	-9.25836e-05	-0.845762	-3.1109e-05	-0.284185	1.71881e-06	0.0107781	5.60164e-07	0.0035126	1.13483e-06	0.00731247	3.68727e-07	0.00237595	2.70781e-07	0.00227928	9.02214e-08	0.000759432
10580	26	1.87996e-07	0.0014941	6.24096e-08	0.000496	1.1278e-06	0.00670943	3.70574e-07	0.00220458	-9.25278e-05	-0.846688	-3.10903e-05	-0.284496	1.72155e-06	0.0107953	5.61058e-07	0.00351821	1.12543e-06	0.00732377	3.65674e-07	0.00237963	2.64788e-07	0.00228196	8.82246e-08	0.000760324
10590	26	1.84582e-07	0.001496	6.12761e-08	0.00049663	1.12491e-06	0.00672072	3.69622e-07	0.00220829	-9.24857e-05	-0.847613	-3.10762e-05	-0.284807	1.72058e-06	0.0108125	5.60741e-07	0.00352382	1.12551e-06	0.00733502	3.65698e-07	0.00238328	2.7083e-07	0.00228463	9.02374e-08	0.000761214
10600	26	1.84685e-07	0.00149784	6.13101e-08	0.000497242	1.12347e-06	0.00673194	3.69148e-07	0.00221198	-9.24494e-05	-0.848538	-3.10639e-05	-0.285117	1.72475e-06	0.0108297	5.62102e-07	0.00352943	1.12616e-06	0.00734627	3.65909e-07	0.00238694	2.64244e-07	0.00228734	8.8043e-08	0.000762117
10610	26	1.80686e-07	0.00149966	5.99829e-08	0.000497847	1.12582e-06	0.0067432	3.69922e-07	0.00221568	-9.24172e-05	-0.849462	-3.10531e-05	-0.285428	1.71792e-06	0.0108469	5.59873e-07	0.00353504	1.13142e-06	0.00735755	3.67617e-07	0.0023906	2.71273e-07	0.00229001	9.03853e-08	0.000763007
10620	26	1.75223e-07	0.00150145	5.8169e-08	0.000498439	1.12501e-06	0.00675445	3.69656e-07	0.00221938	-9.23809e-05	-0.850386	-3.10409e-05	-0.285738	1.7051e-06	0.010864	5.55697e-07	0.00354062	1.13344e-06	0.00736888	3.68274e-07	0.00239428	2.86182e-07	0.0022928	9.53528e-08	0.000763937
10630	26	1.90316e-07	0.00150324	6.31797e-08	0.000499035	1.11338e-06	0.00676565	3.65835e-07	0.00222306	-9.23456e-05	-0.85131	-3.10291e-05	-0.286049	1.69884e-06	0.0108811	5.53655e-07	0.00354617	1.13105e-06	0.00738021	3.67497e-07	0.00239796	2.93882e-07	0.0022957	9.79183e-08	0.000764901
10640	26	1.78115e-07	0.0015051	5.91294e-08	0.000499652	1.10262e-06	0.00677673	3.623e-07	0.0022267	-9.23088e-05	-0.852233	-3.10167e-05	-0.286359	1.69646e-06	0.010898	5.5288e-07	0.0035517	1.14924e-06	0.00739159	3.73407e-07	0.00240166	2.86316e-07	0.00229861	9.53975e-08	0.00076587
10650	26	1.58249e-07	0.00150677	5.25343e-08	0.000500207	1.10188e-06	0.00678775	3.62055e-07	0.00223032	-9.22642e-05	-0.853156	-3.10017e-05	-0.286669	1.70099e-06	0.010915	5.54356e-07	0.00355724	1.15439e-06	0.00740312	3.75082e-07	0.00240541	2.70607e-07	0.00230139	9.01634e-08	0.000766796
10660	26	1.53945e-07	0.00150832	5.11056e-08	0.000500721	1.09979e-06	0.00679876	3.61368e-07	0.00223394	-9.2223e-05	-0.854078	-3.09879e-05	-0.286979	1.70128e-06	0.010932	5.54451e-07	0.00356278	1.14108e-06	0.00741461	3.70758e-07	0.00240914	2.54127e-07	0.00230402	8.46722e-08	0.000767675
10670	26	1.41668e-07	0.0015098	4.70298e-08	0.000501212	1.09606e-06	0.00680973	3.60143e-07	0.00223754	-9.2181e-05	-0.855	-3.09738e-05	-0.287289	1.69604e-06	0.010949	5.52745e-07	0.00356832	1.12562e-06	0.00742593	3.65736e-07	0.00241282	2.48722e-07	0.00230653	8.28714e-08	0.00076851
10680	26	1.38074e-07	0.00151119	4.58366e-08	0.000501675	1.10162e-06	0.00682072	3.61971e-07	0.00224115	-9.21346e-05	-0.855922	-3.09582e-05	-0.287598	1.68815e-06	0.0109659	5.50172e-07	0.00357383	1.13114e-06	0.00743721	3.67527e-07	0.00241648	2.3854e-07	0.00230898	7.94788e-08	0.000769327
10690	26	1.42699e-07	0.00151261	4.73719e-08	0.000502144	1.09283e-06	0.00683173	3.59081e-07	0.00224477	-9.20758e-05	-0.856843	-3.09384e-05	-0.287908	1.68011e-06	0.0109828	5.47553e-07	0.00357932	1.12705e-06	0.00744849	3.66199e-07	0.00242015	2.31349e-07	0.00231129	7.7083e-08	0.000770098
10700	26	1.41275e-07	0.00151405	4.68994e-08	0.000502622	1.08658e-06	0.00684262	3.57029e-07	0.00224835	-9.2028e-05	-0.857763	-3.09224e-05	-0.288217	1.67595e-06	0.0109996	5.46197e-07	0.00358479	1.12212e-06	0.00745973	3.64597e-07	0.0024238	2.3764e-07	0.00231364	7.91789e-08	0.00077088
10710	26	1.27799e-07	0.00151538	4.24256e-08	0.000503066	1.08337e-06	0.00685348	3.55974e-07	0.00225191	-9.19862e-05	-0.858683	-3.09083e-05	-0.288526	1.66533e-06	0.0110163	5.42737e-07	0.00359024	1.11435e-06	0.00747092	3.62072e-07	0.00242744	2.29252e-07	0.00231599	7.63841e-08	0.000771661
10720	26	1.25302e-07	0.00151665	4.15968e-08	0.000503486	1.07618e-06	0.00686426	3.53611e-07	0.00225546	-9.1952e-05	-0.859603	-3.08968e-05	-0.288835	1.66044e-06	0.0110329	5.41141e-07	0.00359566	1.09394e-06	0.00748195	3.55439e-07	0.00243102	2.23962e-07	0.00231824	7.46215e-08	0.000772413
10730	26	1.23089e-07	0.0015179	4.08623e-08	0.0005039	1.06958e-06	0.006875	3.51441e-07	0.00225899	-9.19027e-05	-0.860522	-3.08802e-05	-0.289144	1.64808e-06	0.0110495	5.37115e-07	0.00360105	1.09468e-06	0.00749289	3.55682e-07	0.00243457	2.30292e-07	0.00232051	7.67309e-08	0.00077317
10740	26	1.16984e-07	0.00151909	3.88353e-08	0.000504297	1.07196e-06	0.00688568	3.52223e-07	0.0022625	-9.18402e-05	-0.861441	-3.08592e-05	-0.289453	1.64388e-06	0.0110659	5.35743e-07	0.00360641	1.0977e-06	0.00750386	3.56662e-07	0.00243814	2.25458e-07	0.0023228	7.51201e-08	0.000773931
10750	26	1.04107e-07	0.00152022	3.45607e-08	0.000504672	1.0774e-06	0.00689644	3.54011e-07	0.00226603	-9.17871e-05	-0.862359	-3.08414e-05	-0.289761	1.63188e-06	0.0110823	5.31835e-07	0.00361174	1.10529e-06	0.00751488	3.59127e-07	0.00244172	2.20371e-07	0.00232503	7.34252e-08	0.000774674
10760	26	9.5459e-08	0.0015212	3.16897e-08	0.000504997	1.0903e-06	0.00690729	3.58251e-07	0.0022696	-9.17473e-05	-0.863277	-3.0828e-05	-0.29007	1.63108e-06	0.0110986	5.31572e-07	0.00361706	1.10323e-06	0.00752592	3.58459e-07	0.00244531	2.17674e-07	0.00232722	7.25265e-08	0.000775403
10770	26	1.05131e-07	0.00152222	3.49007e-08	0.000505335	1.0833e-06	0.00691818	3.55951e-07	0.00227318	-9.16964e-05	-0.864194	-3.08109e-05	-0.290378	1.64648e-06	0.011115	5.36591e-07	0.0036224	1.09592e-06	0.00753691	3.56085e-07	0.00244888	2.17359e-07	0.00232939	7.24216e-08	0.000776127
10780	26	1.0461e-07	0.00152327	3.47275e-08	0.000505684	1.08419e-06	0.00692901	3.56243e-07	0.00227673	-9.16563e-05	-0.865111	-3.07975e-05	-0.290686	1.64888e-06	0.0111315	5.37375e-07	0.00362777	1.09281e-06	0.00754785	3.55074e-07	0.00245243	2.208e-07	0.00233159	7.3568e-08	0.000776862
10790	26	9.63149e-08	0.0015243	3.19739e-08	0.000506024	1.07279e-06	0.0069398	3.52499e-07	0.00228028	-9.16024e-05	-0.866027	-3.07794e-05	-0.290994	1.63485e-06	0.0111479	5.32803e-07	0.00363312	1.07997e-06	0.00755872	3.50901e-07	0.00245596	1.99681e-07	0.0023337	6.65314e-08	0.000777563
10800	26	8.04727e-08	0.00152517	2.67147e-08	0.000506316	1.07626e-06	0.00695053	3.53636e-07	0.0022838	-9.15549e-05	-0.866943	-3.07634e-05	-0.291302	1.6309e-06	0.0111642	5.31513e-07	0.00363845	1.07487e-06	0.00756949	3.49243e-07	0.00245946	1.8534e-07	0.00233561	6.17531e-08	0.0007782
10810	26	7.02966e-08	0.00152592	2.33365e-08	0.000506563	1.07258e-06	0.00696129	3.52427e-07	0.00228734	-9.15092e-05	-0.867858	-3.0748e-05	-0.291609	1.63049e-06	0.0111805	5.3138e-07	0.00364376	1.07056e-06	0.00758021	3.47844e-07	0.00246295	1.88693e-07	0.00233748	6.28703e-08	0.000778824
10820	26	6.23498e-08	0.00152659	2.06984e-08	0.000506786	1.06338e-06	0.00697195	3.49405e-07	0.00229084	-9.14711e-05	-0.868773	-3.07352e-05	-0.291917	1.62536e-06	0.0111968	5.2971e-07	0.00364907	1.07367e-06	0.00759093	3.48854e-07	0.00246643	2.00046e-07	0.00233942	6.66531e-08	0.000779471
10830	26	5.96973e-08	0.00152719	1.98179e-08	0.000506985	1.07171e-06	0.00698262	3.52141e-07	0.00229435	-9.14248e-05	-0.869688	-3.07197e-05	-0.292224	1.6239e-06	0.011213	5.29234e-07	0.00365435	1.07996e-06	0.00760169	3.50897e-07	0.00246993	1.87473e-07	0.00234136	6.24641e-08	0.000780116
10840	26	5.5684e-08	0.00152777	1.84855e-08	0.000507178	1.07023e-06	0.00699333	3.51656e-07	0.00229787	-9.13801e-05	-0.870602	-3.07047e-05	-0.292531	1.63006e-06	0.0112293	5.3124e-07	0.00365966	1.08989e-06	0.00761254	3.54123e-07	0.00247345	1.87608e-07	0.00234322	6.25088e-08	0.000780735
10850	26	4.58317e-08	0.00152828	1.52149e-08	0.000507346	1.07048e-06	0.00700404	3.5174e-07	0.00230139	-9.13468e-05	-0.871515	-3.06935e-05	-0.292838	1.63203e-06	0.0112456	5.31884e-07	0.00366498	1.08159e-06	0.0076234	3.51429e-07	0.00247698	1.9034e-07	0.00234513	6.34191e-08	0.000781372
10860	26	3.37447e-08	0.00152869	1.12023e-08	0.000507482	1.08407e-06	0.00701482	3.56204e-07	0.00230493	-9.12995e-05	-0.872429	-3.06776e-05	-0.293145	1.64268e-06	0.011262	5.35352e-07	0.00367031	1.08304e-06	0.00763423	3.519e-07	0.0024805	1.87786e-07	0.00234701	6.25682e-08	0.000781997
10870	26	3.13391e-08	0.00152899	1.04037e-08	0.000507581	1.08926e-06	0.0070257	3.57909e-07	0.0023085	-9.12383e-05	-0.873341	-3.0657e-05	-0.293452	1.65379e-06	0.0112785	5.38976e-07	0.00367568	1.07535e-06	0.00764505	3.494e-07	0.00248401	1.93213e-07	0.00234892	6.43763e-08	0.000782635
10880	26	3.00908e-08	0.00152929	9.9893e-09	0.000507682	1.08101e-06	0.00703655	3.55199e-07	0.00231207	-9.11748e-05	-0.874253	-3.06357e-05	-0.293758	1.65407e-06	0.011295	5.39067e-07	0.00368107	1.06107e-06	0.00765572	3.44761e-07	0.00248748	2.00156e-07	0.00235089	6.66898e-08	0.000783291
10890	26	2.71718e-08	0.00152958	9.02028e-09	0.00050778	1.08009e-06	0.00704735	3.54896e-07	0.00231562	-9.11172e-05	-0.875165	-3.06163e-05	-0.294064	1.63992e-06	0.0113115	5.34453e-07	0.00368644	1.05952e-06	0.00766632	3.44256e-07	0.00249093	2.05819e-07	0.00235291	6.85765e-08	0.000783964
10900	26	3.80902e-08	0.00152989	1.26449e-08	0.00050788	1.08769e-06	0.00705818	3.57395e-07	0.00231918	-9.10707e-05	-0.876076	-3.06007e-05	-0.29437	1.64965e-06	0.0113279	5.37624e-07	0.0036918	1.06382e-06	0.00767691	3.45654e-07	0.00249437	2.01147e-07	0.00235494	6.70201e-08	0.000784641
10910	26	5.9882e-08	0.00153039	1.98792e-08	0.000508048	1.09429e-06	0.00706909	3.59562e-07	0.00232276	-9.10324e-05	-0.876986	-3.05878e-05	-0.294676	1.65089e-06	0.0113444	5.3803e-07	0.00369718	1.06563e-06	0.00768759	3.46243e-07	0.00249784	1.93222e-07	0.00235694	6.43795e-08	0.000785305
10920	26	6.77305e-08	0.00153104	2.24846e-08	0.000508263	1.09018e-06	0.00708002	3.58211e-07	0.00232635	-9.09875e-05	-0.877896	-3.05727e-05	-0.294982	1.63911e-06	0.0113609	5.3419e-07	0.00370254	1.06013e-06	0.00769822	3.44457e-07	0.00250129	2.03256e-07	0.00235889	6.77227e-08	0.000785956
10930	26	6.00529e-08	0.00153168	1.99359e-08	0.000508474	1.09168e-06	0.00709092	3.58703e-07	0.00232993	-9.09331e-05	-0.878806	-3.05544e-05	-0.295288	1.63291e-06	0.0113772	5.32168e-07	0.00370787	1.05642e-06	0.00770879	3.43248e-07	0.00250473	2.12471e-07	0.00236096	7.07928e-08	0.000786647
10940	26	7.12923e-08	0.00153233	2.36671e-08	0.000508691	1.0947e-06	0.00710185	3.59695e-07	0.00233353	-9.08754e-05	-0.879715	-3.05351e-05	-0.295593	1.63317e-06	0.0113936	5.32256e-07	0.00371319	1.05429e-06	0.00771935	3.42557e-07	0.00250815	2.10554e-07	0.00236309	7.01542e-08	0.000787356
10950	26	7.11928e-08	0.00153305	2.3634e-08	0.000508929	1.09905e-06	0.00711283	3.61126e-07	0.00233713	-9.0827e-05	-0.880623	-3.05188e-05	-0.295898	1.63943e-06	0.0114099	5.34296e-07	0.00371853	1.07597e-06	0.00772997	3.49602e-07	0.00251161	2.02607e-07	0.00236515	6.75066e-08	0.000788041
10960	26	8.93293e-08	0.00153383	2.96549e-08	0.000509189	1.09848e-06	0.00712381	3.60937e-07	0.00234074	-9.07775e-05	-0.881531	-3.05022e-05	-0.296204	1.65005e-06	0.0114264	5.37755e-07	0.00372389	1.0806e-06	0.00774078	3.51107e-07	0.00251512	2.17205e-07	0.00236724	7.23702e-08	0.000788739
10970	26	1.11592e-07	0.00153485	3.70455e-08	0.000509527	1.0958e-06	0.00713478	3.60059e-07	0.00234434	-9.07297e-05	-0.882439	-3.04861e-05	-0.296508	1.63808e-06	0.0114428	5.33854e-07	0.00372925	1.06888e-06	0.00775149	3.47298e-07	0.0025186	2.21947e-07	0.00236942	7.39502e-08	0.000789465
10980	26	1.10927e-07	0.00153596	3.68246e-08	0.000509897	1.0844e-06	0.00714568	3.56314e-07	0.00234793	-9.0709e-05	-0.883346	-3.04792e-05	-0.296813	1.63853e-06	0.0114592	5.34003e-07	0.00373458	1.06934e-06	0.00776217	3.47449e-07	0.00252207	2.20931e-07	0.00237163	7.36118e-08	0.000790202
10990	26	9.96817e-08	0.00153702	3.30916e-08	0.000510247	1.08832e-06	0.00715654	3.57601e-07	0.00235149	-9.06809e-05	-0.884253	-3.04697e-05	-0.297118	1.63353e-06	0.0114756	5.32374e-07	0.00373991	1.07353e-06	0.00777291	3.48811e-07	0.00252556	2.23209e-07	0.00237385	7.43708e-08	0.00079094
11000	26	8.68295e-08	0.00153795	2.8825e-08	0.000510557	1.08839e-06	0.00716743	3.57623e-07	0.00235507	-9.06347e-05	-0.88516	-3.04542e-05	-0.297423	1.6351e-06	0.0114919	5.32882e-07	0.00374524	1.05967e-06	0.00778357	3.44306e-07	0.00252902	2.32771e-07	0.00237613	7.75569e-08	0.0007917
11010	26	8.84554e-08	0.00153883	2.93647e-08	0.000510848	1.09244e-06	0.00717835	3.58954e-07	0.00235866	-9.05791e-05	-0.886066	-3.04355e-05	-0.297727	1.62964e-06	0.0115082	5.31106e-07	0.00375056	1.06686e-06	0.0077942	3.46642e-07	0.00253247	2.36008e-07	0.00237847	7.86353e-08	0.000792478
11020	26	8.52767e-08	0.00153969	2.83095e-08	0.000511134	1.08874e-06	0.00718926	3.57737e-07	0.00236225	-9.0519e-05	-0.886971	-3.04153e-05	-0.298031	1.61013e-06	0.0115244	5.24744e-07	0.00375585	1.05367e-06	0.00780478	3.42355e-07	0.00253591	2.40317e-07	0.00238086	8.00711e-08	0.000793276
11030	26	8.10525e-08	0.00154051	2.69072e-08	0.000511406	1.08199e-06	0.00720012	3.55519e-07	0.00236581	-9.04681e-05	-0.887876	-3.03982e-05	-0.298335	1.61678e-06	0.0115406	5.26914e-07	0.0037611	1.05636e-06	0.00781533	3.43229e-07	0.00253934	2.33577e-07	0.00238324	7.78253e-08	0.000794069
11040	26	9.00477e-08	0.00154137	2.98933e-08	0.000511693	1.08209e-06	0.00721093	3.55553e-07	0.00236937	-9.0406e-05	-0.888781	-3.03774e-05	-0.298639	1.61263e-06	0.0115567	5.25561e-07	0.00376637	1.06956e-06	0.00782595	3.47519e-07	0.00254279	2.28885e-07	0.00238553	7.62619e-08	0.000794834
11050	26	8.53463e-08	0.00154224	2.83326e-08	0.00051198	1.08027e-06	0.00722176	3.54956e-07	0.00237292	-9.03609e-05	-0.889684	-3.03622e-05	-0.298943	1.61329e-06	0.0115728	5.25777e-07	0.00377162	1.07641e-06	0.00783671	3.49743e-07	0.00254629	2.3303e-07	0.00238786	7.76432e-08	0.000795607
11060	26	8.9072e-08	0.00154311	2.95694e-08	0.000512269	1.07459e-06	0.00723252	3.5309e-07	0.00237646	-9.03235e-05	-0.890588	-3.03496e-05	-0.299247	1.61978e-06	0.011589	5.2789e-07	0.00377689	1.07327e-06	0.00784746	3.48726e-07	0.00254978	2.34934e-07	0.0023902	7.82775e-08	0.000796387
11070	26	8.82087e-08	0.001544	2.92828e-08	0.000512566	1.08746e-06	0.00724332	3.57317e-07	0.00238001	-9.02737e-05	-0.891491	-3.03329e-05	-0.29955	1.61936e-06	0.0116052	5.27755e-07	0.00378218	1.06368e-06	0.00785816	3.45608e-07	0.00255326	2.2485e-07	0.00239253	7.49176e-08	0.000797163
11080	26	9.59435e-08	0.00154491	3.18506e-08	0.000512866	1.08125e-06	0.00725416	3.55276e-07	0.00238357	-9.02305e-05	-0.892393	-3.03184e-05	-0.299853	1.60392e-06	0.0116214	5.22721e-07	0.00378743	1.05952e-06	0.00786876	3.44256e-07	0.0025567	2.2848e-07	0.00239478	7.61271e-08	0.000797914
11090	26	1.01706e-07	0.00154593	3.37637e-08	0.000513205	1.08571e-06	0.00726499	3.56742e-07	0.00238713	-9.01846e-05	-0.893295	-3.0303e-05	-0.300156	1.59245e-06	0.0116373	5.18984e-07	0.00379263	1.03971e-06	0.00787926	3.3782e-07	0.00256011	2.13292e-07	0.00239701	7.10666e-08	0.000798657
11100	26	9.877e-08	0.00154692	3.27889e-08	0.000513533	1.08639e-06	0.00727585	3.56966e-07	0.0023907	-9.01389e-05	-0.894197	-3.02876e-05	-0.300459	1.58388e-06	0.0116532	5.16191e-07	0.00379781	1.03969e-06	0.00788966	3.37814e-07	0.00256349	2.10357e-07	0.00239912	7.00885e-08	0.000799359
11110	26	1.063e-07	0.00154794	3.52887e-08	0.000513873	1.08938e-06	0.00728673	3.57947e-07	0.00239427	-9.00998e-05	-0.895098	-3.02744e-05	-0.300762	1.58447e-06	0.011669	5.16384e-07	0.00380297	1.04478e-06	0.00790007	3.39468e-07	0.00256687	2.15306e-07	0.00240124	7.17375e-08	0.000800067
11120	26	9.35077e-08	0.00154895	3.1042e-08	0.00051421	1.09053e-06	0.00729762	3.58325e-07	0.00239785	-9.00555e-05	-0.895999	-3.02596e-05	-0.301065	1.58836e-06	0.0116849	5.1765e-07	0.00380814	1.04282e-06	0.00791054	3.38831e-07	0.00257028	2.19118e-07	0.00240343	7.30078e-08	0.000800796
11130	26	8.36858e-08	0.00154983	2.77813e-08	0.000514502	1.10402e-06	0.00730859	3.62759e-07	0.00240146	-9.00128e-05	-0.896899	-3.02452e-05	-0.301367	1.59138e-06	0.0117008	5.18634e-07	0.00381332	1.03696e-06	0.00792093	3.36928e-07	0.00257365	2.25284e-07	0.00240565	7.50622e-08	0.000801537
11140	26	7.89619e-08	0.00155065	2.62132e-08	0.000514773	1.09764e-06	0.00731963	3.60661e-07	0.00240508	-8.9962e-05	-0.897799	-3.02281e-05	-0.30167	1.60714e-06	0.0117168	5.23772e-07	0.00381853	1.05447e-06	0.00793138	3.42617e-07	0.00257705	2.1707e-07	0.00240787	7.23252e-08	0.000802274
11150	26	5.5748e-08	0.00155134	1.85068e-08	0.000515001	1.08842e-06	0.00733055	3.57632e-07	0.00240867	-8.99159e-05	-0.898699	-3.02127e-05	-0.301972	1.60509e-06	0.0117328	5.23105e-07	0.00382377	1.06313e-06	0.00794198	3.45431e-07	0.00258049	2.07973e-07	0.00241001	6.92943e-08	0.000802988
11160	26	4.84259e-08	0.00155184	1.6076e-08	0.000515169	1.08293e-06	0.00734141	3.55829e-07	0.00241224	-8.98678e-05	-0.899598	-3.01965e-05	-0.302274	1.6038e-06	0.0117489	5.22684e-07	0.003829	1.06186e-06	0.0079526	3.45017e-07	0.00258394	2.01775e-07	0.00241205	6.72292e-08	0.000803668
11170	26	5.06242e-08	0.00155234	1.68058e-08	0.000515332	1.06583e-06	0.00735216	3.50211e-07	0.00241577	-8.98289e-05	-0.900496	-3.01834e-05	-0.302576	1.599e-06	0.0117649	5.21118e-07	0.00383421	1.06829e-06	0.00796326	3.47106e-07	0.0025874	1.99615e-07	0.00241406	6.65096e-08	0.000804337
11180	26	4.53496e-08	0.00155282	1.50548e-08	0.000515492	1.05228e-06	0.00736274	3.45758e-07	0.00241925	-8.97901e-05	-0.901394	-3.01704e-05	-0.302878	1.59284e-06	0.0117809	5.19111e-07	0.00383942	1.05576e-06	0.00797387	3.43034e-07	0.00259085	1.96363e-07	0.00241604	6.54259e-08	0.000804998
11190	26	4.39227e-08	0.00155326	1.45811e-08	0.000515641	1.0612e-06	0.00737329	3.4869e-07	0.00242271	-8.9736e-05	-0.902292	-3.01522e-05	-0.303179	1.58708e-06	0.0117968	5.17234e-07	0.0038446	1.05327e-06	0.00798441	3.42226e-07	0.00259428	1.89551e-07	0.00241797	6.31562e-08	0.00080564
11200	26	3.09203e-08	0.00155363	1.02647e-08	0.000515763	1.07131e-06	0.00738391	3.5201e-07	0.0024262	-8.97052e-05	-0.903189	-3.01419e-05	-0.303481	1.60629e-06	0.0118127	5.23494e-07	0.0038498	1.06274e-06	0.00799498	3.45304e-07	0.00259771	2.00185e-07	0.00241995	6.66994e-08	0.000806299
11210	26	1.96317e-08	0.00155392	6.51717e-09	0.000515857	1.07642e-06	0.00739466	3.53691e-07	0.00242974	-8.96634e-05	-0.904086	-3.01278e-05	-0.303782	1.61675e-06	0.0118289	5.26902e-07	0.00385506	1.07905e-06	0.00800568	3.50604e-07	0.00260119	2.09963e-07	0.00242201	6.99573e-08	0.000806987
11220	26	1.16712e-08	0.00155406	3.8745e-09	0.000515904	1.08192e-06	0.00740544	3.55499e-07	0.00243328	-8.96193e-05	-0.904982	-3.0113e-05	-0.304083	1.6432e-06	0.0118452	5.35523e-07	0.00386037	1.08619e-06	0.00801652	3.52924e-07	0.00260471	2.18046e-07	0.00242415	7.26504e-08	0.0008077
11230	26	8.61879e-09	0.00155416	2.8612e-09	0.000515939	1.09587e-06	0.00741633	3.60079e-07	0.00243686	-8.95736e-05	-0.905878	-3.00976e-05	-0.304384	1.63871e-06	0.0118616	5.34061e-07	0.00386573	1.08401e-06	0.00802738	3.52214e-07	0.00260824	2.21302e-07	0.00242635	7.37352e-08	0.000808434
11240	26	4.56201e-09	0.00155422	1.51446e-09	0.000515958	1.0936e-06	0.0074273	3.59334e-07	0.00244046	-8.95334e-05	-0.906774	-3.00841e-05	-0.304685	1.62453e-06	0.0118779	5.29438e-07	0.00387105	1.08805e-06	0.00803824	3.53528e-07	0.00261177	1.96683e-07	0.00242847	6.55327e-08	0.00080914
11250	26	1.59324e-08	0.00155434	5.28911e-09	0.000515999	1.08788e-06	0.00743821	3.57456e-07	0.00244405	-8.94918e-05	-0.907669	-3.00702e-05	-0.304986	1.62201e-06	0.0118942	5.28619e-07	0.00387634	1.09792e-06	0.00804916	3.56733e-07	0.00261532	2.01564e-07	0.00243044	6.71589e-08	0.000809796
11260	26	1.83639e-08	0.00155452	6.09631e-09	0.000516057	1.0783e-06	0.00744906	3.54307e-07	0.00244761	-8.94438e-05	-0.908564	-3.0054e-05	-0.305287	1.61708e-06	0.0119104	5.2701e-07	0.00388162	1.10326e-06	0.00806018	3.58468e-07	0.0026189	2.02616e-07	0.00243249	6.75095e-08	0.00081048
11270	26	1.72956e-08	0.0015547	5.74167e-09	0.000516117	1.06477e-06	0.00745976	3.49862e-07	0.00245113	-8.93888e-05	-0.909458	-3.00355e-05	-0.305587	1.62862e-06	0.0119266	5.30771e-07	0.00388691	1.09047e-06	0.00807112	3.54314e-07	0.00262245	2.10375e-07	0.00243456	7.00948e-08	0.000811169
11280	26	1.92756e-08	0.00155488	6.39897e-09	0.000516177	1.05848e-06	0.00747038	3.47794e-07	0.00245462	-8.93462e-05	-0.910351	-3.00212e-05	-0.305887	1.63208e-06	0.0119429	5.31899e-07	0.00389222	1.09604e-06	0.00808206	3.56124e-07	0.00262601	2.00985e-07	0.0024366	6.6966e-08	0.00081185
11290	26	1.59915e-08	0.00155506	5.30873e-09	0.000516237	1.05337e-06	0.00748094	3.46117e-07	0.00245808	-8.92855e-05	-0.911245	-3.00008e-05	-0.306187	1.64281e-06	0.0119593	5.35395e-07	0.00389756	1.09482e-06	0.00809302	3.55727e-07	0.00262957	2.05309e-07	0.00243863	6.84066e-08	0.000812525
11300	26	1.5285e-08	0.00155522	5.07418e-09	0.000516289	1.05117e-06	0.00749146	3.45394e-07	0.00246154	-8.92444e-05	-0.912137	-2.9987e-05	-0.306487	1.65425e-06	0.0119757	5.39125e-07	0.00390293	1.08349e-06	0.00810391	3.52045e-07	0.0026331	2.11419e-07	0.00244071	7.04425e-08	0.000813219
11310	26	2.01343e-08	0.00155539	6.68405e-09	0.000516347	1.04723e-06	0.00750195	3.44098e-07	0.00246499	-8.92173e-05	-0.91303	-2.99779e-05	-0.306787	1.66245e-06	0.0119923	5.41797e-07	0.00390833	1.07484e-06	0.00811469	3.49236e-07	0.00263661	2.17768e-07	0.00244286	7.25579e-08	0.000813933
11320	26	2.42915e-08	0.00155562	8.0641e-09	0.000516423	1.05778e-06	0.00751246	3.47565e-07	0.00246844	-8.91725e-05	-0.913921	-2.99629e-05	-0.307087	1.65693e-06	0.0120089	5.39997e-07	0.00391375	1.087e-06	0.00812548	3.53185e-07	0.00264012	2.17972e-07	0.00244505	7.26259e-08	0.000814665
11330	26	1.23544e-08	0.00155581	4.10131e-09	0.000516487	1.07055e-06	0.00752312	3.5176e-07	0.00247195	-8.91347e-05	-0.914813	-2.99502e-05	-0.307387	1.6528e-06	0.0120255	5.38653e-07	0.00391914	1.09527e-06	0.00813642	3.55871e-07	0.00264367	2.28014e-07	0.00244726	7.59718e-08	0.000815398
11340	26	1.48992e-08	0.00155593	4.94612e-09	0.000516527	1.07117e-06	0.00753383	3.51966e-07	0.00247547	-8.90889e-05	-0.915704	-2.99348e-05	-0.307686	1.65387e-06	0.012042	5.39002e-07	0.00392453	1.09238e-06	0.00814735	3.54934e-07	0.00264722	2.2059e-07	0.00244952	7.3498e-08	0.000816153
11350	26	1.21521e-08	0.00155609	4.03417e-09	0.000516579	1.07598e-06	0.00754456	3.53546e-07	0.00247899	-8.905e-05	-0.916595	-2.99217e-05	-0.307985	1.65604e-06	0.0120585	5.39709e-07	0.00392991	1.09081e-06	0.00815827	3.54425e-07	0.00265077	2.10885e-07	0.00245165	7.02645e-08	0.000816864
11360	26	5.37164e-09	0.00155617	1.78323e-09	0.000516605	1.08089e-06	0.00755534	3.5516e-07	0.00248253	-8.90056e-05	-0.917485	-2.99068e-05	-0.308284	1.66066e-06	0.0120751	5.41214e-07	0.00393532	1.09901e-06	0.00816922	3.5709e-07	0.00265432	2.1525e-07	0.00245379	7.17189e-08	0.000817575
11370	26	1.41788e-08	0.00155627	4.70697e-09	0.000516637	1.08971e-06	0.0075662	3.58058e-07	0.0024861	-8.89643e-05	-0.918375	-2.98929e-05	-0.308583	1.65031e-06	0.0120917	5.37842e-07	0.00394072	1.09582e-06	0.0081802	3.56052e-07	0.00265789	2.13549e-07	0.00245594	7.11522e-08	0.000818291
11380	26	1.63419e-08	0.00155641	5.42506e-09	0.000516685	1.09607e-06	0.00757711	3.60148e-07	0.00248969	-8.89172e-05	-0.919264	-2.98771e-05	-0.308882	1.65143e-06	0.0121082	5.38206e-07	0.00394609	1.08724e-06	0.00819111	3.53265e-07	0.00266144	1.90353e-07	0.00245797	6.34237e-08	0.000818968
11390	26	2.49797e-08	0.00155662	8.29255e-09	0.000516756	1.10965e-06	0.00758815	3.64608e-07	0.00249331	-8.88698e-05	-0.920153	-2.98612e-05	-0.309181	1.66155e-06	0.0121248	5.41505e-07	0.0039515	1.08914e-06	0.00820199	3.53881e-07	0.00266497	1.93058e-07	0.00245985	6.43249e-08	0.000819595
11400	26	3.7287e-08	0.00155693	1.23782e-08	0.000516856	1.11144e-06	0.00759927	3.65198e-07	0.00249697	-8.88264e-05	-0.921042	-2.98466e-05	-0.309479	1.64345e-06	0.0121413	5.35605e-07	0.00395688	1.08287e-06	0.00821284	3.51845e-07	0.0026685	1.99811e-07	0.00246183	6.65747e-08	0.000820256
11410	26	3.31534e-08	0.00155729	1.1006e-08	0.000516977	1.10998e-06	0.00761037	3.64718e-07	0.00250062	-8.87856e-05	-0.92193	-2.98329e-05	-0.309778	1.64853e-06	0.0121577	5.37261e-07	0.00396224	1.10264e-06	0.00822376	3.58266e-07	0.00267205	1.83101e-07	0.00246375	6.10074e-08	0.000820895
11420	26	3.95419e-08	0.00155765	1.31268e-08	0.000517098	1.10088e-06	0.00762143	3.61729e-07	0.00250425	-8.87411e-05	-0.922817	-2.98179e-05	-0.310076	1.66634e-06	0.0121743	5.43065e-07	0.00396764	1.10991e-06	0.00823481	3.60631e-07	0.00267564	1.78159e-07	0.00246557	5.93607e-08	0.000821501
11430	26	3.40949e-08	0.00155804	1.13186e-08	0.000517227	1.08994e-06	0.0076324	3.58131e-07	0.00250785	-8.86974e-05	-0.923705	-2.98032e-05	-0.310374	1.66065e-06	0.0121909	5.41211e-07	0.00397306	1.09925e-06	0.00824586	3.57166e-07	0.00267923	1.93616e-07	0.00246741	6.45106e-08	0.000822114
11440	26	2.46896e-08	0.00155834	8.19628e-09	0.000517324	1.0933e-06	0.00764331	3.59235e-07	0.00251144	-8.86468e-05	-0.924591	-2.97862e-05	-0.310672	1.66587e-06	0.0122076	5.42913e-07	0.00397848	1.0895e-06	0.0082568	3.53997e-07	0.00268278	2.08477e-07	0.00246943	6.94622e-08	0.000822786
11450	26	2.12452e-08	0.00155855	7.05282e-09	0.000517396	1.09867e-06	0.00765427	3.61001e-07	0.00251504	-8.86067e-05	-0.925478	-2.97728e-05	-0.31097	1.66498e-06	0.0122242	5.42623e-07	0.00398391	1.08141e-06	0.00826766	3.51369e-07	0.00268631	2.20605e-07	0.00247157	7.35031e-08	0.000823499
11460	26	2.73293e-08	0.00155881	9.07258e-09	0.00051748	1.10956e-06	0.00766531	3.6458e-07	0.00251867	-8.85663e-05	-0.926363	-2.97592e-05	-0.311268	1.66767e-06	0.0122409	5.43499e-07	0.00398934	1.0765e-06	0.00827843	3.49773e-07	0.00268981	2.232e-07	0.0024738	7.43678e-08	0.000824242
11470	26	1.47848e-08	0.00155904	4.90814e-09	0.000517558	1.10837e-06	0.00767641	3.64189e-07	0.00252232	-8.85212e-05	-0.927249	-2.9744e-05	-0.311565	1.66375e-06	0.0122576	5.42221e-07	0.00399477	1.08797e-06	0.00828925	3.53501e-07	0.00269333	2.24608e-07	0.00247605	7.48369e-08	0.000824991
11480	26	5.45025e-10	0.00155908	1.80933e-10	0.000517572	1.09603e-06	0.00768746	3.60134e-07	0.00252595	-8.84642e-05	-0.928134	-2.97249e-05	-0.311862	1.66481e-06	0.0122742	5.42567e-07	0.00400019	1.10598e-06	0.00830021	3.59352e-07	0.00269689	2.03746e-07	0.00247819	6.7886e-08	0.000825706
11490	26	4.58929e-09	0.00155911	1.52352e-09	0.000517583	1.12041e-06	0.00769855	3.68143e-07	0.00252959	-8.84368e-05	-0.929018	-2.97157e-05	-0.31216	1.68538e-06	0.0122909	5.49269e-07	0.00400565	1.11063e-06	0.0083113	3.60864e-07	0.00270049	2.01155e-07	0.00248021	6.70227e-08	0.000826379
11500	26	2.19557e-09	0.00155916	7.28868e-10	0.000517597	1.12534e-06	0.00770978	3.69766e-07	0.00253328	-8.84155e-05	-0.929903	-2.97085e-05	-0.312457	1.68598e-06	0.0123078	5.49465e-07	0.00401115	1.11267e-06	0.00832241	3.61527e-07	0.0027041	2.00924e-07	0.00248222	6.69458e-08	0.000827049
11510	26	-1.19169e-08	0.0015591	-3.95608e-09	0.000517579	1.11811e-06	0.00772101	3.67389e-07	0.00253697	-8.83767e-05	-0.930787	-2.96955e-05	-0.312754	1.68804e-06	0.0123247	5.50136e-07	0.00401665	1.10944e-06	0.00833352	3.60478e-07	0.00270771	2.08976e-07	0.00248428	6.96286e-08	0.000827735
11520	26	-1.16808e-08	0.00155895	-3.8777e-09	0.000517527	1.11592e-06	0.00773217	3.66669e-07	0.00254064	-8.83464e-05	-0.93167	-2.96853e-05	-0.313051	1.68339e-06	0.0123415	5.48623e-07	0.00402214	1.10995e-06	0.00834463	3.60641e-07	0.00271132	2.2641e-07	0.00248644	7.54372e-08	0.000828454
11530	26	-6.8118e-10	0.0015589	-2.26133e-10	0.000517511	1.10019e-06	0.00774324	3.615e-07	0.00254427	-8.83094e-05	-0.932553	-2.96729e-05	-0.313347	1.68309e-06	0.0123584	5.48524e-07	0.00402763	1.10808e-06	0.00835571	3.60035e-07	0.00271492	2.34484e-07	0.00248876	7.81274e-08	0.000829226
11540	26	6.33147e-09	0.00155892	2.10187e-09	0.000517517	1.10138e-06	0.00775425	3.61893e-07	0.00254789	-8.82762e-05	-0.933436	-2.96617e-05	-0.313644	1.68272e-06	0.0123752	5.48401e-07	0.00403311	1.11034e-06	0.0083668	3.6077e-07	0.00271853	2.33228e-07	0.0024911	7.77091e-08	0.000830007
11550	26	2.26911e-08	0.00155906	7.53281e-09	0.000517565	1.10056e-06	0.00776527	3.6162e-07	0.00255151	-8.82213e-05	-0.934319	-2.96433e-05	-0.313941	1.68886e-06	0.0123921	5.50405e-07	0.00403861	1.10212e-06	0.00837788	3.58099e-07	0.00272213	2.22667e-07	0.00249338	7.41903e-08	0.000830766
11560	26	3.58521e-08	0.00155936	1.19019e-08	0.000517663	1.11429e-06	0.00777635	3.66132e-07	0.00255515	-8.81831e-05	-0.935201	-2.96304e-05	-0.314237	1.66271e-06	0.0124088	5.41881e-07	0.00404407	1.10448e-06	0.00838893	3.58865e-07	0.00272571	2.23834e-07	0.00249561	7.4579e-08	0.000831508
11570	26	3.3653e-08	0.00155971	1.11719e-08	0.000517779	1.11113e-06	0.00778748	3.65097e-07	0.00255881	-8.81353e-05	-0.936083	-2.96144e-05	-0.314533	1.64922e-06	0.0124254	5.37487e-07	0.00404946	1.09817e-06	0.00839994	3.56814e-07	0.00272929	2.18354e-07	0.00249782	7.27531e-08	0.000832245
11580	26	4.54497e-08	0.00156008	1.5088e-08	0.000517905	1.10889e-06	0.00779857	3.64359e-07	0.00256245	-8.80912e-05	-0.936964	-2.95995e-05	-0.314829	1.65552e-06	0.0124419	5.3954e-07	0.00405484	1.09395e-06	0.0084109	3.55444e-07	0.00273285	2.26677e-07	0.00250002	7.55262e-08	0.000832981
11590	26	6.0267e-08	0.00156061	2.0007e-08	0.00051808	1.10015e-06	0.00780962	3.61488e-07	0.00256608	-8.80499e-05	-0.937844	-2.95857e-05	-0.315125	1.65354e-06	0.0124584	5.38893e-07	0.00406024	1.10858e-06	0.00842191	3.60197e-07	0.00273643	2.27482e-07	0.00250231	7.57946e-08	0.000833742
11600	26	6.33257e-08	0.00156125	2.10224e-08	0.000518293	1.09944e-06	0.00782061	3.61254e-07	0.00256969	-8.80109e-05	-0.938725	-2.95725e-05	-0.315421	1.65077e-06	0.012475	5.3799e-07	0.00406562	1.12014e-06	0.00843305	3.63955e-07	0.00274005	2.19092e-07	0.00250452	7.2999e-08	0.000834479
11610	26	7.81909e-08	0.00156197	2.59572e-08	0.000518531	1.10672e-06	0.00783163	3.63648e-07	0.00257332	-8.79612e-05	-0.939605	-2.95559e-05	-0.315717	1.64897e-06	0.0124914	5.37403e-07	0.004071	1.12267e-06	0.00844426	3.64775e-07	0.00274369	2.1716e-07	0.00250672	7.23551e-08	0.000835211
11620	26	8.72726e-08	0.0015628	2.89721e-08	0.000518808	1.11662e-06	0.00784275	3.66899e-07	0.00257697	-8.79245e-05	-0.940484	-2.95435e-05	-0.316012	1.65172e-06	0.012508	5.38302e-07	0.00407638	1.12388e-06	0.00845552	3.65169e-07	0.00274735	2.17707e-07	0.00250888	7.25375e-08	0.00083593
11630	26	9.86554e-08	0.00156373	3.27509e-08	0.000519116	1.1134e-06	0.00785391	3.65841e-07	0.00258064	-8.78859e-05	-0.941363	-2.95306e-05	-0.316308	1.6446e-06	0.0125244	5.3598e-07	0.00408175	1.1137e-06	0.00846671	3.61862e-07	0.00275099	2.33118e-07	0.00251113	7.76724e-08	0.000836682
11640	26	1.00552e-07	0.00156473	3.33805e-08	0.000519447	1.10992e-06	0.00786501	3.64697e-07	0.00258429	-8.786e-05	-0.942242	-2.95219e-05	-0.316603	1.63576e-06	0.0125408	5.33097e-07	0.0040871	1.11434e-06	0.00847785	3.62069e-07	0.0027546	2.46295e-07	0.00251353	8.20626e-08	0.000837479
11650	26	1.13542e-07	0.00156577	3.76929e-08	0.000519792	1.10181e-06	0.00787606	3.62033e-07	0.00258791	-8.7821e-05	-0.94312	-2.95087e-05	-0.316898	1.64102e-06	0.0125572	5.34814e-07	0.00409244	1.11352e-06	0.00848899	3.61801e-07	0.00275822	2.51033e-07	0.00251602	8.36414e-08	0.000838311
11660	26	1.17419e-07	0.0015669	3.89797e-08	0.000520168	1.10898e-06	0.0078871	3.64387e-07	0.00259154	-8.77647e-05	-0.943998	-2.94898e-05	-0.317193	1.6446e-06	0.0125737	5.3598e-07	0.00409779	1.11952e-06	0.00850015	3.63751e-07	0.00276185	2.39592e-07	0.00251848	7.98293e-08	0.000839131
11670	26	1.20442e-07	0.00156809	3.99833e-08	0.000520562	1.11204e-06	0.00789821	3.65393e-07	0.00259519	-8.77161e-05	-0.944876	-2.94735e-05	-0.317488	1.63865e-06	0.0125901	5.34041e-07	0.00410314	1.12228e-06	0.00851136	3.64649e-07	0.00276549	2.34227e-07	0.00252084	7.80419e-08	0.000839917
11680	26	1.17772e-07	0.00156929	3.90972e-08	0.000520961	1.1225e-06	0.00790938	3.68831e-07	0.00259886	-8.76787e-05	-0.945752	-2.94609e-05	-0.317782	1.6369e-06	0.0126065	5.33472e-07	0.00410849	1.12507e-06	0.00852259	3.65557e-07	0.00276914	2.36837e-07	0.00252321	7.89116e-08	0.000840705
11690	26	1.16074e-07	0.00157048	3.85332e-08	0.000521355	1.1452e-06	0.00792072	3.76289e-07	0.00260259	-8.76348e-05	-0.946629	-2.94462e-05	-0.318077	1.63629e-06	0.0126228	5.33271e-07	0.00411381	1.12694e-06	0.00853385	3.66163e-07	0.0027728	2.48578e-07	0.00252561	8.28235e-08	0.000841507
11700	26	1.20437e-07	0.00157165	3.99816e-08	0.000521746	1.15356e-06	0.00793221	3.79038e-07	0.00260637	-8.75836e-05	-0.947505	-2.9429e-05	-0.318371	1.64162e-06	0.0126392	5.35009e-07	0.00411915	1.13617e-06	0.00854519	3.69163e-07	0.00277649	2.55871e-07	0.00252817	8.52533e-08	0.000842358
11710	26	1.18497e-07	0.00157285	3.93376e-08	0.000522144	1.14902e-06	0.00794372	3.77544e-07	0.00261015	-8.75459e-05	-0.948381	-2.94163e-05	-0.318666	1.66149e-06	0.0126557	5.41485e-07	0.00412453	1.12734e-06	0.00855653	3.66292e-07	0.00278017	2.54036e-07	0.0025307	8.4642e-08	0.000843203
11720	26	1.15035e-07	0.00157403	3.81884e-08	0.000522533	1.1343e-06	0.00795515	3.72707e-07	0.0026139	-8.75151e-05	-0.949256	-2.9406e-05	-0.31896	1.67003e-06	0.0126724	5.44267e-07	0.00412996	1.12854e-06	0.00856781	3.66684e-07	0.00278383	2.55379e-07	0.00253325	8.50895e-08	0.000844051
11730	26	1.1443e-07	0.00157516	3.79875e-08	0.00052291	1.11266e-06	0.00796637	3.65599e-07	0.00261759	-8.74654e-05	-0.950131	-2.93893e-05	-0.319254	1.65939e-06	0.012689	5.40799e-07	0.00413539	1.12593e-06	0.00857909	3.65836e-07	0.0027875	2.60685e-07	0.00253584	8.68573e-08	0.000844913
11740	26	1.23579e-07	0.00157634	4.10247e-08	0.0005233	1.11307e-06	0.00797749	3.65732e-07	0.00262124	-8.74136e-05	-0.951005	-2.93718e-05	-0.319548	1.67068e-06	0.0127057	5.4448e-07	0.00414081	1.12563e-06	0.00859034	3.65739e-07	0.00279116	2.64265e-07	0.00253845	8.80501e-08	0.000845784
11750	26	1.36821e-07	0.00157765	4.54209e-08	0.000523737	1.1179e-06	0.00798864	3.67319e-07	0.00262491	-8.7373e-05	-0.951879	-2.93582e-05	-0.319841	1.67515e-06	0.0127224	5.45935e-07	0.00414626	1.1144e-06	0.00860155	3.62088e-07	0.0027948	2.59638e-07	0.00254109	8.65085e-08	0.000846663
11760	26	1.40234e-07	0.00157905	4.65538e-08	0.000524201	1.13188e-06	0.00799988	3.71914e-07	0.0026286	-8.73279e-05	-0.952753	-2.93431e-05	-0.320135	1.6783e-06	0.0127392	5.46964e-07	0.00415172	1.11859e-06	0.00861269	3.6345e-07	0.00279842	2.62085e-07	0.00254368	8.73238e-08	0.000847525
11770	26	1.29049e-07	0.00158039	4.28406e-08	0.000524645	1.13086e-06	0.00801118	3.71576e-07	0.00263231	-8.7286e-05	-0.953626	-2.9329e-05	-0.320428	1.66582e-06	0.0127559	5.42894e-07	0.00415717	1.11832e-06	0.00862388	3.63363e-07	0.00280205	2.56963e-07	0.00254626	8.56173e-08	0.000848384
11780	26	1.35216e-07	0.0015817	4.4888e-08	0.000525081	1.14397e-06	0.00802255	3.75884e-07	0.00263605	-8.7235e-05	-0.954498	-2.93119e-05	-0.320721	1.66236e-06	0.0127725	5.41767e-07	0.0041626	1.1303e-06	0.00863511	3.67256e-07	0.0028057	2.69164e-07	0.00254889	8.96826e-08	0.000849261
11790	26	1.41602e-07	0.00158309	4.7008e-08	0.000525543	1.14099e-06	0.00803398	3.74905e-07	0.0026398	-8.7191e-05	-0.955371	-2.92971e-05	-0.321014	1.68115e-06	0.0127892	5.47892e-07	0.00416804	1.13601e-06	0.00864644	3.6911e-07	0.00280938	2.76084e-07	0.00255161	9.1988e-08	0.000850167
11800	26	1.41243e-07	0.00158451	4.68889e-08	0.000526013	1.13574e-06	0.00804536	3.73181e-07	0.00264355	-8.71449e-05	-0.956242	-2.92816e-05	-0.321307	1.67755e-06	0.012806	5.46717e-07	0.00417352	1.14729e-06	0.00865785	3.72776e-07	0.00281309	2.78213e-07	0.00255438	9.26974e-08	0.000851091
11810	26	1.51103e-07	0.00158596	5.0162e-08	0.000526496	1.13217e-06	0.00805669	3.72009e-07	0.00264727	-8.709e-05	-0.957113	-2.92631e-05	-0.3216	1.67332e-06	0.0128228	5.4534e-07	0.00417898	1.15603e-06	0.00866938	3.75614e-07	0.00281684	2.79935e-07	0.00255717	9.32714e-08	0.00085202
11820	26	1.50574e-07	0.00158748	4.99863e-08	0.000526999	1.14071e-06	0.00806806	3.74813e-07	0.002651	-8.70407e-05	-0.957984	-2.92466e-05	-0.321892	1.66875e-06	0.0128395	5.4385e-07	0.00418443	1.15716e-06	0.00868094	3.75981e-07	0.00282059	2.87858e-07	0.00256002	9.5911e-08	0.00085297
11830	26	1.30634e-07	0.00158887	4.3367e-08	0.000527461	1.14112e-06	0.00807946	3.74948e-07	0.00265475	-8.6999e-05	-0.958854	-2.92326e-05	-0.322185	1.6619e-06	0.0128561	5.41617e-07	0.00418985	1.15204e-06	0.00869249	3.74317e-07	0.00282435	2.8092e-07	0.00256286	9.35994e-08	0.000853917
11840	26	1.29657e-07	0.00159016	4.30426e-08	0.000527889	1.14575e-06	0.00809089	3.76469e-07	0.00265851	-8.69594e-05	-0.959724	-2.92193e-05	-0.322477	1.66393e-06	0.0128728	5.4228e-07	0.00419527	1.13392e-06	0.00870394	3.6843e-07	0.00282806	2.84793e-07	0.00256568	9.48897e-08	0.000854855
11850	26	1.35551e-07	0.00159147	4.49993e-08	0.000528325	1.13634e-06	0.0081023	3.73378e-07	0.00266225	-8.69186e-05	-0.960594	-2.92055e-05	-0.322769	1.6694e-06	0.0128894	5.44063e-07	0.0042007	1.14654e-06	0.00871535	3.72533e-07	0.00283177	2.78204e-07	0.0025685	9.26946e-08	0.000855795
11860	26	1.44283e-07	0.00159288	4.78979e-08	0.000528792	1.13148e-06	0.00811364	3.71781e-07	0.00266598	-8.68844e-05	-0.961463	-2.91941e-05	-0.323061	1.664e-06	0.0129061	5.42301e-07	0.00420613	1.15556e-06	0.00872686	3.75462e-07	0.00283551	2.79364e-07	0.00257128	9.3081e-08	0.000856722
11870	26	1.43196e-07	0.00159432	4.75371e-08	0.000529269	1.12475e-06	0.00812492	3.69569e-07	0.00266969	-8.68401e-05	-0.962331	-2.91792e-05	-0.323353	1.66733e-06	0.0129228	5.43386e-07	0.00421156	1.15492e-06	0.00873842	3.75256e-07	0.00283927	2.79894e-07	0.00257408	9.32576e-08	0.000857654
11880	26	1.39978e-07	0.00159574	4.64688e-08	0.000529741	1.13069e-06	0.0081362	3.71522e-07	0.00267339	-8.67943e-05	-0.963199	-2.91638e-05	-0.323645	1.66382e-06	0.0129394	5.42245e-07	0.00421699	1.15141e-06	0.00874995	3.74113e-07	0.00284302	2.73325e-07	0.00257686	9.10689e-08	0.000858582
11890	26	1.40303e-07	0.00159714	4.65767e-08	0.000530207	1.12946e-06	0.0081475	3.71119e-07	0.0026771	-8.67479e-05	-0.964067	-2.91482e-05	-0.323936	1.66402e-06	0.0129561	5.4231e-07	0.00422242	1.14663e-06	0.00876145	3.7256e-07	0.00284675	2.65729e-07	0.00257956	8.8538e-08	0.000859479
11900	26	1.3884e-07	0.00159852	4.60912e-08	0.000530666	1.13186e-06	0.00815879	3.71906e-07	0.00268082	-8.67099e-05	-0.964934	-2.91354e-05	-0.324228	1.65906e-06	0.0129727	5.40693e-07	0.00422783	1.13743e-06	0.00877285	3.69572e-07	0.00285046	2.65947e-07	0.0025822	8.86105e-08	0.00086036
11910	26	1.47151e-07	0.00159996	4.885e-08	0.000531144	1.13596e-06	0.00817013	3.73255e-07	0.00268454	-8.66844e-05	-0.965801	-2.91269e-05	-0.324519	1.6587e-06	0.0129893	5.40575e-07	0.00423324	1.12395e-06	0.00878415	3.65193e-07	0.00285413	2.60546e-07	0.00258485	8.68111e-08	0.000861243
11920	26	1.4592e-07	0.00160144	4.84415e-08	0.000531633	1.14019e-06	0.00818151	3.74644e-07	0.00268828	-8.66406e-05	-0.966668	-2.91121e-05	-0.32481	1.66861e-06	0.0130059	5.43806e-07	0.00423866	1.1145e-06	0.00879533	3.62122e-07	0.00285776	2.40618e-07	0.00258735	8.01713e-08	0.000862076
11930	26	1.3471e-07	0.00160285	4.47198e-08	0.000532101	1.14616e-06	0.00819294	3.76604e-07	0.00269204	-8.66067e-05	-0.967534	-2.91007e-05	-0.325101	1.65863e-06	0.0130226	5.40553e-07	0.00424409	1.10387e-06	0.00880641	3.58666e-07	0.00286136	2.44325e-07	0.00258976	8.14065e-08	0.00086288
11940	26	1.28188e-07	0.00160417	4.25549e-08	0.000532539	1.15095e-06	0.00820442	3.7818e-07	0.00269581	-8.65579e-05	-0.9684	-2.90843e-05	-0.325392	1.6624e-06	0.0130391	5.41781e-07	0.00424949	1.09617e-06	0.00881741	3.56165e-07	0.00286494	2.33005e-07	0.00259215	7.76346e-08	0.000863677
11950	26	1.12039e-07	0.00160534	3.7194e-08	0.000532927	1.14738e-06	0.00821593	3.77005e-07	0.00269959	-8.65205e-05	-0.969265	-2.90718e-05	-0.325683	1.67024e-06	0.0130558	5.44336e-07	0.00425493	1.10733e-06	0.00882841	3.59792e-07	0.00286851	2.35266e-07	0.00259449	7.83879e-08	0.000864455
11960	26	1.15028e-07	0.00160643	3.81861e-08	0.00053329	1.13869e-06	0.00822735	3.7415e-07	0.00270334	-8.64789e-05	-0.97013	-2.90578e-05	-0.325974	1.67453e-06	0.0130726	5.45735e-07	0.0042604	1.10851e-06	0.00883948	3.60176e-07	0.00287211	2.38891e-07	0.00259684	7.95959e-08	0.00086524
11970	26	1.17425e-07	0.00160761	3.8982e-08	0.000533681	1.14335e-06	0.00823879	3.75683e-07	0.0027071	-8.64447e-05	-0.970995	-2.90463e-05	-0.326264	1.66389e-06	0.0130893	5.42267e-07	0.00426584	1.10089e-06	0.00885052	3.577e-07	0.00287569	2.46546e-07	0.00259928	8.21465e-08	0.000866051
11980	26	1.12992e-07	0.00160874	3.75102e-08	0.000534056	1.14394e-06	0.00825022	3.75877e-07	0.00271086	-8.63893e-05	-0.971859	-2.90277e-05	-0.326555	1.67012e-06	0.0131059	5.44298e-07	0.00427126	1.08621e-06	0.00886145	3.52931e-07	0.00287924	2.30134e-07	0.00260167	7.66781e-08	0.000866849
11990	26	1.17315e-07	0.0016099	3.89452e-08	0.000534442	1.12931e-06	0.00826158	3.71068e-07	0.00271459	-8.63542e-05	-0.972723	-2.90159e-05	-0.326845	1.66556e-06	0.0131227	5.42812e-07	0.00427671	1.09729e-06	0.00887236	3.56528e-07	0.00288279	2.26577e-07	0.00260394	7.54931e-08	0.000867602
12000	26	1.18496e-07	0.00161106	3.93373e-08	0.000534829	1.13826e-06	0.00827291	3.74009e-07	0.00271831	-8.63134e-05	-0.973586	-2.90022e-05	-0.327135	1.67339e-06	0.0131394	5.45362e-07	0.00428215	1.1079e-06	0.00888339	3.59977e-07	0.00288637	2.27017e-07	0.0026062	7.56396e-08	0.000868358
12010	26	1.28965e-07	0.0016123	4.28128e-08	0.00053524	1.142e-06	0.0082843	3.7524e-07	0.00272205	-8.62741e-05	-0.974449	-2.8989e-05	-0.327425	1.67593e-06	0.0131561	5.46191e-07	0.00428761	1.11736e-06	0.00889452	3.63051e-07	0.00288999	2.2956e-07	0.00260848	7.64867e-08	0.000869118
12020	26	1.37569e-07	0.00161363	4.56691e-08	0.000535682	1.14536e-06	0.00829575	3.76342e-07	0.00272582	-8.62323e-05	-0.975312	-2.89749e-05	-0.327715	1.68874e-06	0.0131729	5.50365e-07	0.00429309	1.11905e-06	0.00890571	3.636e-07	0.00289363	2.48316e-07	0.00261085	8.27361e-08	0.000869906
12030	26	1.43501e-07	0.00161506	4.76384e-08	0.000536155	1.14374e-06	0.0083072	3.75809e-07	0.00272958	-8.61885e-05	-0.976174	-2.89602e-05	-0.328004	1.69099e-06	0.0131898	5.511e-07	0.0042986	1.12151e-06	0.00891691	3.644e-07	0.00289727	2.57363e-07	0.00261341	8.57504e-08	0.000870758
12040	26	1.32247e-07	0.00161643	4.39023e-08	0.000536611	1.14298e-06	0.00831863	3.75561e-07	0.00273333	-8.61402e-05	-0.977035	-2.8944e-05	-0.328294	1.68179e-06	0.0132067	5.48101e-07	0.00430409	1.13254e-06	0.00892818	3.67983e-07	0.00290093	2.54506e-07	0.00261596	8.47986e-08	0.000871608
12050	26	1.47147e-07	0.00161782	4.88487e-08	0.000537071	1.14276e-06	0.00833004	3.75487e-07	0.00273708	-8.60926e-05	-0.977897	-2.8928e-05	-0.328583	1.68112e-06	0.0132235	5.47882e-07	0.00430957	1.12889e-06	0.00893946	3.66798e-07	0.00290459	2.60614e-07	0.00261853	8.68336e-08	0.000872464
12060	26	1.42818e-07	0.00161928	4.74115e-08	0.000537556	1.13742e-06	0.00834144	3.73733e-07	0.00274083	-8.60504e-05	-0.978757	-2.89138e-05	-0.328872	1.67685e-06	0.0132403	5.46491e-07	0.00431504	1.13754e-06	0.00895079	3.69609e-07	0.00290827	2.43795e-07	0.00262105	8.12299e-08	0.000873304
12070	26	1.46444e-07	0.00162072	4.86153e-08	0.000538034	1.14492e-06	0.00835284	3.76199e-07	0.00274458	-8.60056e-05	-0.979618	-2.88987e-05	-0.329162	1.66733e-06	0.013257	5.43387e-07	0.00432049	1.14619e-06	0.00896222	3.72419e-07	0.00291199	2.41036e-07	0.00262346	8.03105e-08	0.000874107
12080	26	1.4305e-07	0.00162216	4.74886e-08	0.000538514	1.14567e-06	0.0083643	3.76443e-07	0.00274834	-8.59652e-05	-0.980477	-2.88852e-05	-0.32945	1.67114e-06	0.0132737	5.44628e-07	0.00432593	1.12723e-06	0.00897357	3.66257e-07	0.00291568	2.53682e-07	0.00262594	8.45241e-08	0.000874936
12090	26	1.29456e-07	0.00162354	4.29757e-08	0.000538972	1.14549e-06	0.00837576	3.76385e-07	0.00275211	-8.59252e-05	-0.981337	-2.88717e-05	-0.329739	1.67167e-06	0.0132904	5.44801e-07	0.00433137	1.12058e-06	0.00898481	3.64098e-07	0.00291933	2.46433e-07	0.00262845	8.21088e-08	0.000875771
12100	26	1.18095e-07	0.00162477	3.92042e-08	0.00053938	1.13528e-06	0.00838716	3.73029e-07	0.00275585	-8.58804e-05	-0.982196	-2.88567e-05	-0.330028	1.68232e-06	0.0133072	5.48272e-07	0.00433684	1.1284e-06	0.00899605	3.66637e-07	0.00292298	2.3699e-07	0.00263087	7.89624e-08	0.000876577
12110	26	1.15476e-07	0.00162594	3.83349e-08	0.000539766	1.13804e-06	0.00839851	3.73938e-07	0.00275958	-8.58291e-05	-0.983054	-2.88394e-05	-0.330316	1.6886e-06	0.013324	5.50318e-07	0.00434234	1.12154e-06	0.0090073	3.6441e-07	0.00292663	2.35299e-07	0.00263324	7.83991e-08	0.000877367
12120	26	1.09138e-07	0.00162706	3.62307e-08	0.000540139	1.13034e-06	0.00840989	3.71406e-07	0.00276332	-8.57798e-05	-0.983913	-2.88229e-05	-0.330605	1.68995e-06	0.0133409	5.50761e-07	0.00434784	1.12143e-06	0.0090185	3.64373e-07	0.00293027	2.20118e-07	0.00263552	7.33409e-08	0.000878125
12130	26	1.06101e-07	0.00162812	3.52224e-08	0.000540491	1.12971e-06	0.00842119	3.712e-07	0.00276703	-8.57335e-05	-0.98477	-2.88073e-05	-0.330893	1.70093e-06	0.0133579	5.54339e-07	0.00435337	1.12754e-06	0.00902976	3.66357e-07	0.00293393	2.27582e-07	0.00263775	7.58277e-08	0.000878868
12140	26	9.28688e-08	0.00162913	3.08299e-08	0.000540825	1.13494e-06	0.00843251	3.72918e-07	0.00277075	-8.56887e-05	-0.985627	-2.87923e-05	-0.331181	1.69841e-06	0.0133749	5.53518e-07	0.00435892	1.12758e-06	0.00904104	3.6637e-07	0.0029376	2.2138e-07	0.00263999	7.37615e-08	0.000879616
12150	26	9.10274e-08	0.00163003	3.02186e-08	0.000541126	1.13594e-06	0.00844386	3.73246e-07	0.00277448	-8.56535e-05	-0.986484	-2.87804e-05	-0.331469	1.69599e-06	0.0133919	5.52729e-07	0.00436445	1.12317e-06	0.00905229	3.64938e-07	0.00294125	2.07465e-07	0.00264214	6.91252e-08	0.000880333
12160	26	8.63221e-08	0.00163093	2.86566e-08	0.000541422	1.14469e-06	0.00845526	3.76122e-07	0.00277823	-8.56131e-05	-0.98734	-2.87669e-05	-0.331756	1.69194e-06	0.0134088	5.51406e-07	0.00436997	1.12634e-06	0.00906354	3.65969e-07	0.00294491	1.98626e-07	0.00264416	6.61799e-08	0.000881005
12170	26	9.78763e-08	0.00163183	3.24922e-08	0.000541724	1.14966e-06	0.00846675	3.77755e-07	0.002782	-8.55603e-05	-0.988196	-2.87491e-05	-0.332044	1.6629e-06	0.0134256	5.41945e-07	0.00437544	1.12259e-06	0.00907477	3.64749e-07	0.00294856	2.0018e-07	0.00264618	6.66979e-08	0.000881677
12180	26	1.01074e-07	0.00163284	3.35537e-08	0.000542058	1.13886e-06	0.00847818	3.74207e-07	0.00278576	-8.55202e-05	-0.989051	-2.87357e-05	-0.332331	1.64987e-06	0.0134421	5.37698e-07	0.00438083	1.12152e-06	0.009086	3.64401e-07	0.0029522	1.89213e-07	0.00264813	6.30435e-08	0.000882327
12190	26	8.56928e-08	0.00163378	2.84476e-08	0.00054237	1.13541e-06	0.00848955	3.73072e-07	0.0027895	-8.54809e-05	-0.989907	-2.87224e-05	-0.332619	1.66813e-06	0.0134587	5.43649e-07	0.00438623	1.13682e-06	0.00909727	3.69374e-07	0.00295587	1.87383e-07	0.00265001	6.2434e-08	0.000882952
12200	26	7.58626e-08	0.00163458	2.51843e-08	0.000542634	1.1346e-06	0.00850089	3.72807e-07	0.00279322	-8.54318e-05	-0.990761	-2.8706e-05	-0.332906	1.67835e-06	0.0134755	5.46979e-07	0.0043917	1.1417e-06	0.00910867	3.70958e-07	0.00295957	1.92196e-07	0.0026519	6.40376e-08	0.000883584
12210	26	6.84783e-08	0.0016353	2.27329e-08	0.000542874	1.15329e-06	0.00851235	3.78948e-07	0.00279699	-8.53892e-05	-0.991615	-2.86916e-05	-0.333193	1.67119e-06	0.0134922	5.44645e-07	0.00439715	1.13786e-06	0.00912009	3.69712e-07	0.00296328	2.00392e-07	0.00265385	6.67684e-08	0.000884234
12220	26	6.78038e-08	0.00163597	2.2509e-08	0.000543097	1.15185e-06	0.00852387	3.78475e-07	0.00280077	-8.53563e-05	-0.992469	-2.86806e-05	-0.33348	1.67792e-06	0.013509	5.4684e-07	0.00440261	1.12769e-06	0.00913141	3.66406e-07	0.00296696	2.10953e-07	0.00265592	7.0287e-08	0.000884922
12230	26	7.92834e-08	0.00163671	2.63199e-08	0.000543343	1.14111e-06	0.00853536	3.74944e-07	0.00280455	-8.53233e-05	-0.993322	-2.86695e-05	-0.333766	1.68197e-06	0.0135258	5.4816e-07	0.00440809	1.11852e-06	0.00914265	3.63427e-07	0.00297061	2.22925e-07	0.00265806	7.42761e-08	0.000885636
12240	26	7.04084e-08	0.00163747	2.33736e-08	0.000543594	1.12459e-06	0.00854669	3.69518e-07	0.00280827	-8.52703e-05	-0.994175	-2.86517e-05	-0.334053	1.68058e-06	0.0135426	5.47704e-07	0.00441356	1.11735e-06	0.00915382	3.63048e-07	0.00297424	2.23897e-07	0.00266031	7.45999e-08	0.000886385
12250	26	6.85316e-08	0.00163815	2.27506e-08	0.00054382	1.11631e-06	0.00855788	3.66799e-07	0.00281195	-8.52211e-05	-0.995028	-2.86352e-05	-0.334339	1.6746e-06	0.0135594	5.45756e-07	0.00441903	1.1265e-06	0.00916505	3.6602e-07	0.00297789	2.11832e-07	0.00266248	7.05802e-08	0.00088711
12260	26	7.81662e-08	0.00163888	2.5949e-08	0.000544064	1.12221e-06	0.00856906	3.68737e-07	0.00281562	-8.51826e-05	-0.99588	-2.86222e-05	-0.334626	1.67217e-06	0.0135761	5.44966e-07	0.00442448	1.11297e-06	0.00917627	3.61624e-07	0.00298153	2.02876e-07	0.00266456	6.75961e-08	0.000887803
12270	26	9.15402e-08	0.00163974	3.03888e-08	0.00054435	1.11913e-06	0.00858027	3.67723e-07	0.00281931	-8.51448e-05	-0.996731	-2.86095e-05	-0.334912	1.66526e-06	0.0135928	5.42714e-07	0.00442992	1.10977e-06	0.00918739	3.60583e-07	0.00298515	1.88697e-07	0.00266653	6.28718e-08	0.000888459
12280	26	8.48184e-08	0.00164061	2.81574e-08	0.000544638	1.13083e-06	0.00859152	3.71569e-07	0.002823	-8.5093e-05	-0.997583	-2.85921e-05	-0.335198	1.67975e-06	0.0136095	5.47434e-07	0.00443538	1.1123e-06	0.00919851	3.61406e-07	0.00298876	1.84629e-07	0.00266837	6.15165e-08	0.000889072
12290	26	8.9933e-08	0.00164148	2.98553e-08	0.000544926	1.14847e-06	0.00860292	3.77363e-07	0.00282675	-8.5049e-05	-0.998433	-2.85773e-05	-0.335484	1.67055e-06	0.0136263	5.44437e-07	0.00444083	1.10918e-06	0.00920961	3.60393e-07	0.00299237	1.86249e-07	0.00267023	6.2056e-08	0.00088969
12300	26	8.31757e-08	0.00164232	2.7612e-08	0.000545205	1.15875e-06	0.00861446	3.80742e-07	0.00283054	-8.50052e-05	-0.999284	-2.85626e-05	-0.335769	1.66037e-06	0.0136429	5.4112e-07	0.00444626	1.12335e-06	0.00922078	3.64995e-07	0.002996	1.94255e-07	0.00267214	6.47237e-08	0.000890326
12310	26	8.68681e-08	0.00164318	2.88378e-08	0.00054549	1.16034e-06	0.00862605	3.81264e-07	0.00283435	-8.49727e-05	-1.00013	-2.85517e-05	-0.336055	1.6522e-06	0.0136595	5.38456e-07	0.00445165	1.12286e-06	0.00923202	3.64839e-07	0.00299965	1.80852e-07	0.00267403	6.02579e-08	0.000890958
12320	26	9.02638e-08	0.00164406	2.99651e-08	0.000545783	1.16335e-06	0.00863767	3.82253e-07	0.00283816	-8.49388e-05	-1.00098	-2.85403e-05	-0.33634	1.6556e-06	0.013676	5.39563e-07	0.00445704	1.10701e-06	0.00924318	3.59688e-07	0.00300327	1.62486e-07	0.00267575	5.41386e-08	0.000891529
12330	26	8.05324e-08	0.00164493	2.67345e-08	0.000546071	1.17423e-06	0.00864934	3.85829e-07	0.002842	-8.49139e-05	-1.00183	-2.85319e-05	-0.336626	1.64386e-06	0.0136925	5.35737e-07	0.00446242	1.09932e-06	0.0092542	3.57188e-07	0.00300686	1.77598e-07	0.00267744	5.91736e-08	0.000892093
12340	26	6.86464e-08	0.00164567	2.27887e-08	0.000546316	1.18028e-06	0.00866112	3.87815e-07	0.00284587	-8.48788e-05	-1.00268	-2.85202e-05	-0.336911	1.64382e-06	0.0137089	5.35727e-07	0.00446778	1.09409e-06	0.00926517	3.55491e-07	0.00301042	1.87974e-07	0.00267927	6.26309e-08	0.000892704
12350	26	7.40086e-08	0.00164638	2.45688e-08	0.000546553	1.16689e-06	0.00867286	3.83416e-07	0.00284973	-8.48525e-05	-1.00353	-2.85113e-05	-0.337196	1.62303e-06	0.0137253	5.2895e-07	0.00447311	1.09061e-06	0.00927609	3.54359e-07	0.00301397	1.88101e-07	0.00268116	6.26732e-08	0.000893332
12360	26	7.73938e-08	0.00164713	2.56926e-08	0.000546802	1.1582e-06	0.00868449	3.80562e-07	0.00285355	-8.48221e-05	-1.00438	-2.85011e-05	-0.337481	1.61963e-06	0.0137415	5.27841e-07	0.00447839	1.09111e-06	0.00928701	3.54522e-07	0.00301752	1.75596e-07	0.00268299	5.85065e-08	0.000893944
12370	26	7.03252e-08	0.00164789	2.3346e-08	0.000547053	1.14278e-06	0.00869601	3.75496e-07	0.00285733	-8.47861e-05	-1.00523	-2.8489e-05	-0.337766	1.61485e-06	0.0137577	5.26284e-07	0.00448366	1.08575e-06	0.0092979	3.52779e-07	0.00302105	1.81207e-07	0.00268477	6.03763e-08	0.000894534
12380	26	6.17446e-08	0.00164854	2.04975e-08	0.00054727	1.14453e-06	0.00870742	3.76071e-07	0.00286108	-8.47419e-05	-1.00607	-2.84741e-05	-0.338051	1.61105e-06	0.0137738	5.25046e-07	0.00448892	1.06865e-06	0.00930867	3.47222e-07	0.00302455	1.77432e-07	0.00268658	5.91184e-08	0.000895138
12390	26	4.33875e-08	0.00164907	1.44034e-08	0.000547445	1.1433e-06	0.00871887	3.75667e-07	0.00286485	-8.47016e-05	-1.00692	-2.84606e-05	-0.338336	1.60814e-06	0.0137899	5.24099e-07	0.00449416	1.06492e-06	0.00931933	3.46011e-07	0.00302802	1.63922e-07	0.00268828	5.4617e-08	0.000895707
12400	26	4.11978e-08	0.00164949	1.36765e-08	0.000547584	1.12832e-06	0.00873024	3.70743e-07	0.00286858	-8.46619e-05	-1.00777	-2.84473e-05	-0.33862	1.61695e-06	0.013806	5.26968e-07	0.00449941	1.06548e-06	0.00932998	3.46193e-07	0.00303148	1.53014e-07	0.00268987	5.09825e-08	0.000896234
12410	26	4.01046e-08	0.00164989	1.33136e-08	0.000547719	1.12142e-06	0.00874146	3.68477e-07	0.00287227	-8.46214e-05	-1.00861	-2.84336e-05	-0.338905	1.61592e-06	0.0138222	5.26632e-07	0.00450469	1.0688e-06	0.00934065	3.47271e-07	0.00303494	1.38378e-07	0.00269133	4.61062e-08	0.000896722
12420	26	3.49359e-08	0.00165027	1.15977e-08	0.000547842	1.12476e-06	0.0087527	3.69572e-07	0.00287596	-8.45851e-05	-1.00946	-2.84214e-05	-0.339189	1.61172e-06	0.0138383	5.25264e-07	0.00450994	1.08125e-06	0.0093514	3.51317e-07	0.00303844	1.36736e-07	0.00269269	4.55588e-08	0.000897174
12430	26	2.71509e-08	0.00165058	9.01333e-09	0.000547946	1.13507e-06	0.00876399	3.72961e-07	0.00287967	-8.45478e-05	-1.01031	-2.84089e-05	-0.339473	1.60767e-06	0.0138544	5.23944e-07	0.00451519	1.07883e-06	0.0093622	3.50533e-07	0.00304195	1.41521e-07	0.00269408	4.71532e-08	0.000897637
12440	26	2.46921e-08	0.00165084	8.19709e-09	0.000548033	1.12897e-06	0.00877533	3.70957e-07	0.0028834	-8.45095e-05	-1.01115	-2.83961e-05	-0.339757	1.60715e-06	0.0138705	5.23774e-07	0.00452042	1.0826e-06	0.009373	3.51756e-07	0.00304546	1.42402e-07	0.00269552	4.74468e-08	0.000898117
12450	26	2.82132e-08	0.00165111	9.366e-09	0.000548122	1.11842e-06	0.00878656	3.67489e-07	0.00288709	-8.44712e-05	-1.012	-2.83832e-05	-0.340041	1.61404e-06	0.0138866	5.26021e-07	0.00452568	1.07362e-06	0.00938379	3.48837e-07	0.00304896	1.47228e-07	0.00269697	4.90548e-08	0.0008986
12460	26	2.75616e-08	0.00165139	9.14968e-09	0.000548217	1.10947e-06	0.0087977	3.64549e-07	0.00289075	-8.44498e-05	-1.01284	-2.8376e-05	-0.340325	1.59663e-06	0.0139026	5.20346e-07	0.00453091	1.05689e-06	0.00939445	3.43403e-07	0.00305242	1.38403e-07	0.00269838	4.61142e-08	0.00089907
12470	26	2.74045e-08	0.00165168	9.09754e-09	0.000548311	1.11214e-06	0.0088088	3.65428e-07	0.0028944	-8.44126e-05	-1.01369	-2.83635e-05	-0.340609	1.60497e-06	0.0139187	5.23063e-07	0.00453613	1.05727e-06	0.00940502	3.43527e-07	0.00305586	1.40133e-07	0.00269977	4.66906e-08	0.000899534
12480	26	1.08443e-08	0.00165186	3.60002e-09	0.000548373	1.11583e-06	0.00881994	3.6664e-07	0.00289805	-8.43775e-05	-1.01453	-2.83517e-05	-0.340892	1.59706e-06	0.0139347	5.20486e-07	0.00454135	1.05621e-06	0.00941558	3.43183e-07	0.00305929	1.41363e-07	0.00270118	4.71006e-08	0.000900004
12490	26	1.40346e-08	0.00165199	4.65911e-09	0.000548415	1.1268e-06	0.00883116	3.70244e-07	0.00290174	-8.43492e-05	-1.01537	-2.83422e-05	-0.341176	1.59475e-06	0.0139506	5.19734e-07	0.00454654	1.05213e-06	0.00942611	3.41856e-07	0.00306271	1.35176e-07	0.00270256	4.50392e-08	0.000900463
12500	26	1.8371e-08	0.00165216	6.09866e-09	0.000548471	1.12588e-06	0.00884245	3.69943e-07	0.00290545	-8.43127e-05	-1.01622	-2.83299e-05	-0.341459	1.60229e-06	0.0139666	5.22192e-07	0.00455176	1.05308e-06	0.00943664	3.42166e-07	0.00306613	1.54203e-07	0.002704	5.13786e-08	0.000900941
12510	26	4.05879e-09	0.00165227	1.34741e-09	0.000548508	1.12187e-06	0.00885368	3.68625e-07	0.00290914	-8.4275e-05	-1.01706	-2.83173e-05	-0.341742	1.60059e-06	0.0139826	5.21635e-07	0.00455698	1.04987e-06	0.00944716	3.41121e-07	0.00306955	1.66162e-07	0.00270561	5.53635e-08	0.00090148
12520	26	-4.22894e-09	0.00165227	-1.40389e-09	0.000548508	1.11297e-06	0.00886488	3.657e-07	0.00291282	-8.42279e-05	-1.0179	-2.83014e-05	-0.342025	1.60466e-06	0.0139987	5.22963e-07	0.0045622	1.06081e-06	0.00945771	3.44675e-07	0.00307298	1.65941e-07	0.00270728	5.52896e-08	0.000902037
12530	26	-2.43495e-09	0.00165223	-8.08337e-10	0.000548493	1.10032e-06	0.00887592	3.61544e-07	0.00291645	-8.41794e-05	-1.01874	-2.82851e-05	-0.342308	1.61983e-06	0.0140148	5.27907e-07	0.00456746	1.06894e-06	0.00946835	3.47319e-07	0.00307644	1.71575e-07	0.00270894	5.71671e-08	0.00090259
12540	26	8.00279e-09	0.00165224	2.65671e-09	0.000548497	1.10569e-06	0.00888695	3.63307e-07	0.00292007	-8.41454e-05	-1.01959	-2.82737e-05	-0.342591	1.60709e-06	0.0140309	5.23755e-07	0.00457271	1.05393e-06	0.00947898	3.42441e-07	0.00307989	1.69196e-07	0.00271069	5.63742e-08	0.000903173
12550	26	1.22851e-08	0.00165234	4.0783e-09	0.000548532	1.09551e-06	0.00889796	3.59964e-07	0.00292369	-8.41154e-05	-1.02043	-2.82636e-05	-0.342874	1.61127e-06	0.014047	5.25118e-07	0.00457796	1.04878e-06	0.00948948	3.40766e-07	0.0030833	1.45701e-07	0.00271228	4.85461e-08	0.0009037
12560	26	1.21383e-08	0.00165248	4.02957e-09	0.000548577	1.10358e-06	0.00890895	3.62614e-07	0.0029273	-8.40802e-05	-1.02127	-2.82518e-05	-0.343156	1.60223e-06	0.0140631	5.22173e-07	0.0045832	1.05534e-06	0.00950002	3.429e-07	0.00308673	1.36783e-07	0.00271367	4.55747e-08	0.000904164
12570	26	4.36359e-09	0.00165257	1.44859e-09	0.000548606	1.1099e-06	0.00892002	3.64689e-07	0.00293094	-8.40573e-05	-1.02211	-2.82441e-05	-0.343439	1.59951e-06	0.014079	5.21286e-07	0.0045884	1.06002e-06	0.00951058	3.44421e-07	0.00309016	1.4234e-07	0.00271507	4.74262e-08	0.00090463
12580	26	-2.7381e-09	0.00165257	-9.08973e-10	0.000548606	1.11183e-06	0.00893113	3.65324e-07	0.00293459	-8.40165e-05	-1.02295	-2.82304e-05	-0.343721	1.61623e-06	0.0140952	5.26734e-07	0.00459365	1.04959e-06	0.00952114	3.4103e-07	0.00309359	1.53489e-07	0.00271655	5.11409e-08	0.000905124
12590	26	-5.05961e-09	0.00165254	-1.67965e-09	0.000548596	1.10628e-06	0.00894224	3.63502e-07	0.00293824	-8.39768e-05	-1.02379	-2.82171e-05	-0.344003	1.61496e-06	0.0141113	5.26321e-07	0.00459891	1.05326e-06	0.00953162	3.42223e-07	0.003097	1.57031e-07	0.0027181	5.23208e-08	0.000905641
12600	26	-5.87015e-09	0.00165249	-1.94873e-09	0.00054858	1.10081e-06	0.00895327	3.61702e-07	0.00294186	-8.39333e-05	-1.02463	-2.82025e-05	-0.344285	1.6024e-06	0.0141274	5.22226e-07	0.00460415	1.06327e-06	0.00954222	3.45476e-07	0.00310044	1.4803e-07	0.00271961	4.93218e-08	0.000906145
12610	26	-1.54809e-08	0.00165238	-5.13924e-09	0.000548545	1.10568e-06	0.0089643	3.63304e-07	0.00294549	-8.38858e-05	-1.02547	-2.81865e-05	-0.344567	1.59779e-06	0.0141434	5.20724e-07	0.00460936	1.05193e-06	0.0095528	3.4179e-07	0.00310388	1.38013e-07	0.00272104	4.59844e-08	0.000906622
12620	26	-1.75857e-08	0.0016522	-5.83797e-09	0.000548485	1.10775e-06	0.00897538	3.63985e-07	0.00294913	-8.38471e-05	-1.02631	-2.81735e-05	-0.344849	1.59513e-06	0.0141593	5.19856e-07	0.00461456	1.06069e-06	0.00956334	3.44638e-07	0.0031073	1.32207e-07	0.00272239	4.40498e-08	0.000907072
12630	26	-4.77494e-09	0.00165209	-1.58515e-09	0.000548448	1.11154e-06	0.00898647	3.65229e-07	0.00295277	-8.38174e-05	-1.02714	-2.81635e-05	-0.345131	1.60919e-06	0.0141753	5.24438e-07	0.00461978	1.0707e-06	0.00957402	3.4789e-07	0.00311077	1.36301e-07	0.00272372	4.54139e-08	0.000907514
12640	26	-6.12563e-09	0.00165205	-2.03354e-09	0.000548433	1.11381e-06	0.0089976	3.65977e-07	0.00295643	-8.37832e-05	-1.02798	-2.8152e-05	-0.345412	1.60876e-06	0.0141914	5.24299e-07	0.00462503	1.05972e-06	0.00958467	3.44322e-07	0.00311423	1.47332e-07	0.00272515	4.90893e-08	0.000907989
12650	26	-9.73032e-09	0.00165199	-3.2302e-09	0.000548414	1.11857e-06	0.00900876	3.67539e-07	0.0029601	-8.37625e-05	-1.02882	-2.81451e-05	-0.345694	1.59646e-06	0.0142075	5.20291e-07	0.00463026	1.05841e-06	0.00959526	3.43895e-07	0.00311767	1.54802e-07	0.00272667	5.15783e-08	0.000908498
12660	26	-2.51143e-08	0.00165182	-8.33724e-09	0.000548357	1.11354e-06	0.00901993	3.65887e-07	0.00296377	-8.37278e-05	-1.02966	-2.81334e-05	-0.345975	1.60259e-06	0.0142235	5.22288e-07	0.00463547	1.04762e-06	0.00960579	3.4039e-07	0.00312109	1.54075e-07	0.00272821	5.1336e-08	0.00090901
12670	26	-2.29871e-08	0.00165157	-7.63107e-09	0.000548275	1.11614e-06	0.00903107	3.66741e-07	0.00296743	-8.36902e-05	-1.03049	-2.81207e-05	-0.346257	1.59858e-06	0.0142395	5.20983e-07	0.00464068	1.05978e-06	0.00961633	3.44341e-07	0.00312452	1.52947e-07	0.00272976	5.09601e-08	0.000909524
12680	26	-7.37707e-09	0.0016514	-2.44898e-09	0.00054822	1.13196e-06	0.00904229	3.71938e-07	0.00297111	-8.36569e-05	-1.03133	-2.81096e-05	-0.346538	1.59501e-06	0.0142555	5.19818e-07	0.00464589	1.07178e-06	0.00962698	3.48242e-07	0.00312798	1.44977e-07	0.00273123	4.83046e-08	0.000910017
12690	26	-4.29331e-09	0.00165136	-1.42526e-09	0.000548206	1.13601e-06	0.00905363	3.73269e-07	0.00297484	-8.36256e-05	-1.03217	-2.80991e-05	-0.346819	1.59218e-06	0.0142714	5.18897e-07	0.00465108	1.07e-06	0.00963771	3.47662e-07	0.00313146	1.44832e-07	0.00273268	4.82564e-08	0.000910498
12700	26	2.88295e-09	0.0016513	9.5706e-10	0.000548187	1.15123e-06	0.00906507	3.7827e-07	0.0029786	-8.35894e-05	-1.033	-2.80869e-05	-0.3471	1.59482e-06	0.0142873	5.19755e-07	0.00465626	1.0613e-06	0.00964835	3.44834e-07	0.00313492	1.54481e-07	0.00273419	5.14715e-08	0.000911002
12710	26	2.33108e-08	0.00165147	7.73855e-09	0.000548242	1.14261e-06	0.00907654	3.75438e-07	0.00298237	-8.35631e-05	-1.03384	-2.80781e-05	-0.347381	1.59873e-06	0.0143032	5.2103e-07	0.00466147	1.0512e-06	0.00965892	3.41553e-07	0.00313836	1.45715e-07	0.00273567	4.85506e-08	0.000911496
12720	26	2.26624e-08	0.00165167	7.52329e-09	0.00054831	1.14365e-06	0.00908796	3.75781e-07	0.00298612	-8.35246e-05	-1.03467	-2.80651e-05	-0.347661	1.59615e-06	0.0143192	5.20191e-07	0.00466668	1.04148e-06	0.00966937	3.38396e-07	0.00314175	1.44141e-07	0.00273711	4.80263e-08	0.000911975
12730	26	3.00301e-08	0.00165195	9.96915e-09	0.000548401	1.14815e-06	0.00909942	3.77259e-07	0.00298989	-8.34813e-05	-1.03551	-2.80506e-05	-0.347942	1.60881e-06	0.0143353	5.24315e-07	0.0046719	1.05061e-06	0.00967983	3.41362e-07	0.00314515	1.55515e-07	0.00273862	5.1816e-08	0.000912477
12740	26	3.15744e-08	0.00165225	1.04818e-08	0.000548502	1.14293e-06	0.00911088	3.75544e-07	0.00299365	-8.34307e-05	-1.03634	-2.80336e-05	-0.348222	1.60627e-06	0.0143513	5.23486e-07	0.00467714	1.05925e-06	0.00969038	3.4417e-07	0.00314858	1.65049e-07	0.00274021	5.49923e-08	0.000913007
12750	26	2.6277e-08	0.00165253	8.72324e-09	0.000548594	1.14904e-06	0.00912233	3.7755e-07	0.00299741	-8.33793e-05	-1.03718	-2.80163e-05	-0.348503	1.60819e-06	0.0143674	5.24115e-07	0.00468237	1.0697e-06	0.00970104	3.47565e-07	0.00315204	1.73476e-07	0.0027419	5.78002e-08	0.000913571
12760	26	2.5928e-08	0.00165279	8.60736e-09	0.000548681	1.13978e-06	0.00913376	3.74509e-07	0.00300117	-8.33516e-05	-1.03801	-2.8007e-05	-0.348783	1.60565e-06	0.0143835	5.23285e-07	0.00468761	1.06766e-06	0.0097117	3.46902e-07	0.00315551	1.77897e-07	0.0027437	5.92734e-08	0.000914171
12770	26	2.71604e-08	0.00165305	9.0165e-09	0.000548766	1.14625e-06	0.00914517	3.76633e-07	0.00300492	-8.33304e-05	-1.03885	-2.79999e-05	-0.349063	1.61277e-06	0.0143995	5.25606e-07	0.00469284	1.0677e-06	0.00972239	3.46915e-07	0.00315898	1.85119e-07	0.0027455	6.16796e-08	0.000914769
12780	26	2.32835e-08	0.00165331	7.72949e-09	0.000548852	1.14555e-06	0.00915664	3.76404e-07	0.00300869	-8.32938e-05	-1.03968	-2.79876e-05	-0.349343	1.61824e-06	0.0144157	5.27389e-07	0.00469811	1.05305e-06	0.00973299	3.42155e-07	0.00316242	1.81636e-07	0.00274733	6.05192e-08	0.000915381
12790	26	2.02499e-08	0.00165352	6.72241e-09	0.000548922	1.14277e-06	0.00916807	3.7549e-07	0.00301244	-8.32568e-05	-1.04051	-2.79751e-05	-0.349622	1.63593e-06	0.0144319	5.33155e-07	0.00470341	1.05726e-06	0.00974352	3.43522e-07	0.00316584	1.79552e-07	0.00274914	5.98248e-08	0.000915984
12800	26	2.01718e-08	0.00165371	6.69646e-09	0.000548986	1.13691e-06	0.00917947	3.73566e-07	0.00301619	-8.3224e-05	-1.04134	-2.79641e-05	-0.349902	1.64439e-06	0.0144483	5.3591e-07	0.00470876	1.06738e-06	0.00975415	3.46811e-07	0.0031693	1.67922e-07	0.0027509	5.59498e-08	0.000916569
12810	26	1.21205e-08	0.00165388	4.02365e-09	0.000549041	1.13897e-06	0.00919085	3.74244e-07	0.00301993	-8.31935e-05	-1.04218	-2.79539e-05	-0.350182	1.65059e-06	0.0144648	5.3793e-07	0.00471413	1.05512e-06	0.00976478	3.42827e-07	0.00317275	1.67525e-07	0.00275259	5.58174e-08	0.000917134
12820	26	2.13231e-09	0.00165395	7.07866e-10	0.000549065	1.14076e-06	0.00920225	3.74831e-07	0.00302367	-8.31703e-05	-1.04301	-2.79461e-05	-0.350461	1.65925e-06	0.0144814	5.40754e-07	0.00471952	1.0613e-06	0.00977537	3.44836e-07	0.00317619	1.60693e-07	0.00275422	5.35411e-08	0.000917677
12830	26	2.55417e-09	0.00165395	8.47912e-10	0.000549066	1.13336e-06	0.00921362	3.72401e-07	0.00302741	-8.31367e-05	-1.04384	-2.79348e-05	-0.350741	1.65755e-06	0.014498	5.402e-07	0.00472492	1.05793e-06	0.00978597	3.43741e-07	0.00317964	1.663e-07	0.00275587	5.54092e-08	0.000918226
12840	26	1.04644e-09	0.00165397	3.47389e-10	0.000549072	1.1372e-06	0.00922497	3.73661e-07	0.00303114	-8.31118e-05	-1.04467	-2.79264e-05	-0.35102	1.65414e-06	0.0145145	5.39088e-07	0.00473032	1.0689e-06	0.00979659	3.47306e-07	0.00318309	1.6179e-07	0.00275752	5.39066e-08	0.000918775
12850	26	4.31185e-09	0.001654	1.43142e-09	0.000549082	1.13287e-06	0.00923631	3.72239e-07	0.00303486	-8.30663e-05	-1.0455	-2.79111e-05	-0.351299	1.65221e-06	0.0145311	5.38459e-07	0.00473571	1.07099e-06	0.00980725	3.47985e-07	0.00318655	1.60506e-07	0.00275914	5.34789e-08	0.000919315
12860	26	3.63801e-09	0.00165404	1.20772e-09	0.000549094	1.14874e-06	0.00924774	3.77454e-07	0.00303862	-8.30408e-05	-1.04633	-2.79026e-05	-0.351578	1.65322e-06	0.0145476	5.3879e-07	0.0047411	1.07471e-06	0.009818	3.49193e-07	0.00319004	1.62415e-07	0.00276075	5.4115e-08	0.000919853
12870	26	1.7181e-08	0.00165413	5.70363e-09	0.000549125	1.14311e-06	0.0092592	3.75603e-07	0.00304239	-8.30093e-05	-1.04716	-2.7892e-05	-0.351857	1.65136e-06	0.0145641	5.38184e-07	0.00474648	1.0848e-06	0.00982879	3.5247e-07	0.00319355	1.60827e-07	0.00276236	5.35856e-08	0.000920389
12880	26	2.53522e-08	0.00165436	8.41622e-09	0.000549202	1.14514e-06	0.00927064	3.76271e-07	0.00304614	-8.29676e-05	-1.04799	-2.7878e-05	-0.352136	1.65083e-06	0.0145806	5.3801e-07	0.00475187	1.08919e-06	0.00983966	3.53897e-07	0.00319708	1.75923e-07	0.00276406	5.86156e-08	0.000920953
12890	26	2.68314e-08	0.00165461	8.90727e-09	0.000549286	1.14623e-06	0.00928209	3.76627e-07	0.00304991	-8.29266e-05	-1.04882	-2.78642e-05	-0.352415	1.63404e-06	0.014597	5.32537e-07	0.00475722	1.09028e-06	0.00985056	3.54253e-07	0.00320062	1.72451e-07	0.00276581	5.74587e-08	0.000921536
12900	26	3.08571e-08	0.00165492	1.02437e-08	0.000549387	1.1566e-06	0.00929362	3.80036e-07	0.0030537	-8.28849e-05	-1.04965	-2.78502e-05	-0.352693	1.64883e-06	0.0146135	5.37358e-07	0.00476256	1.09318e-06	0.00986147	3.55193e-07	0.00320417	1.69223e-07	0.00276753	5.63831e-08	0.000922111
12910	26	2.71318e-09	0.00165511	9.00701e-10	0.000549452	1.15759e-06	0.00930519	3.8036e-07	0.0030575	-8.28496e-05	-1.05048	-2.78383e-05	-0.352972	1.66781e-06	0.01463	5.43542e-07	0.00476797	1.08546e-06	0.00987238	3.52684e-07	0.00320771	1.63722e-07	0.0027692	5.45502e-08	0.000922666
12920	26	3.14921e-09	0.00165511	1.04545e-09	0.00054945	1.16244e-06	0.00931679	3.81954e-07	0.00306131	-8.28063e-05	-1.05131	-2.78238e-05	-0.35325	1.67647e-06	0.0146468	5.46367e-07	0.00477343	1.07672e-06	0.00988318	3.49845e-07	0.00321122	1.45592e-07	0.00277071	4.85095e-08	0.00092317
12930	26	-4.5778e-09	0.00165511	-1.5197e-09	0.000549452	1.16318e-06	0.00932841	3.82196e-07	0.00306513	-8.2787e-05	-1.05214	-2.78173e-05	-0.353528	1.67644e-06	0.0146635	5.46356e-07	0.00477888	1.08825e-06	0.00989401	3.53591e-07	0.00321474	1.40284e-07	0.00277214	4.67411e-08	0.000923648
12940	26	-1.19533e-08	0.00165502	-3.96817e-09	0.00054942	1.15487e-06	0.00934001	3.79467e-07	0.00306894	-8.2752e-05	-1.05296	-2.78055e-05	-0.353806	1.67854e-06	0.0146803	5.47041e-07	0.00478435	1.08602e-06	0.00990488	3.52869e-07	0.00321827	1.45654e-07	0.00277356	4.85304e-08	0.00092412
12950	26	-6.30304e-10	0.00165497	-2.09244e-10	0.000549403	1.14688e-06	0.0093515	3.76842e-07	0.00307272	-8.27188e-05	-1.05379	-2.77944e-05	-0.354084	1.68317e-06	0.0146971	5.48548e-07	0.00478983	1.09445e-06	0.00991577	3.55608e-07	0.00322181	1.62485e-07	0.00277511	5.41382e-08	0.000924635
12960	26	-2.04829e-09	0.00165497	-6.79977e-10	0.000549404	1.15536e-06	0.00936301	3.79628e-07	0.0030765	-8.26848e-05	-1.05462	-2.77829e-05	-0.354362	1.6845e-06	0.014714	5.48983e-07	0.00479532	1.11883e-06	0.00992685	3.6353e-07	0.00322541	1.71234e-07	0.00277678	5.70534e-08	0.000925194
12970	26	-2.49653e-09	0.00165494	-8.28777e-10	0.000549393	1.15353e-06	0.00937455	3.79028e-07	0.00308029	-8.26411e-05	-1.05544	-2.77683e-05	-0.35464	1.67314e-06	0.0147308	5.45282e-07	0.0048008	1.1186e-06	0.00993808	3.63454e-07	0.00322906	1.77826e-07	0.00277852	5.92497e-08	0.000925772
12980	26	1.02025e-08	0.00165499	3.38695e-09	0.000549412	1.15299e-06	0.00938609	3.78849e-07	0.00308408	-8.26128e-05	-1.05627	-2.77588e-05	-0.354918	1.67345e-06	0.0147475	5.45382e-07	0.00480625	1.11942e-06	0.00994926	3.63721e-07	0.00323269	1.83531e-07	0.00278034	6.11504e-08	0.000926378
12990	26	5.10856e-09	0.00165507	1.6959e-09	0.000549437	1.15839e-06	0.00939765	3.80624e-07	0.00308788	-8.25753e-05	-1.0571	-2.77461e-05	-0.355195	1.69259e-06	0.0147643	5.51619e-07	0.00481174	1.1257e-06	0.00996049	3.6576e-07	0.00323634	1.93885e-07	0.00278223	6.46002e-08	0.000927009
13000	26	1.47394e-08	0.00165515	4.89307e-09	0.000549463	1.16017e-06	0.00940924	3.81209e-07	0.00309169	-8.25474e-05	-1.05792	-2.77368e-05	-0.355473	1.70484e-06	0.0147813	5.55611e-07	0.00481727	1.1234e-06	0.00997174	3.65014e-07	0.00324	1.9434e-07	0.00278418	6.47518e-08	0.000927657
13010	26	1.75951e-08	0.00165531	5.84109e-09	0.000549518	1.15721e-06	0.00942082	3.80235e-07	0.00309549	-8.25168e-05	-1.05875	-2.77265e-05	-0.35575	1.71563e-06	0.0147984	5.59129e-07	0.00482284	1.12593e-06	0.00998299	3.65836e-07	0.00324365	2.10125e-07	0.00278621	7.00115e-08	0.000928334
13020	26	2.58464e-08	0.00165552	8.58028e-09	0.000549588	1.16022e-06	0.0094324	3.81226e-07	0.0030993	-8.24804e-05	-1.05957	-2.77142e-05	-0.356027	1.73398e-06	0.0148157	5.65108e-07	0.00482846	1.13574e-06	0.00999429	3.69021e-07	0.00324732	2.09591e-07	0.00278832	6.98335e-08	0.000929036
13030	26	3.72759e-08	0.00165582	1.23745e-08	0.000549687	1.1676e-06	0.00944404	3.83648e-07	0.00310312	-8.24405e-05	-1.0604	-2.77008e-05	-0.356304	1.74551e-06	0.0148331	5.68867e-07	0.00483414	1.14869e-06	0.0100057	3.73231e-07	0.00325103	2.05082e-07	0.00279037	6.8331e-08	0.000929721
13040	26	5.03202e-08	0.00165626	1.67049e-08	0.000549831	1.16946e-06	0.00945573	3.84263e-07	0.00310696	-8.24135e-05	-1.06122	-2.76918e-05	-0.356581	1.75819e-06	0.0148506	5.72998e-07	0.00483986	1.14439e-06	0.0100172	3.71832e-07	0.00325475	2.13182e-07	0.00279248	7.103e-08	0.000930423
13050	26	5.03483e-08	0.00165676	1.67142e-08	0.000549998	1.16672e-06	0.00946741	3.83361e-07	0.0031108	-8.23773e-05	-1.06205	-2.76796e-05	-0.356858	1.74792e-06	0.0148681	5.69651e-07	0.00484557	1.14576e-06	0.0100286	3.72277e-07	0.00325848	2.13432e-07	0.0027946	7.11132e-08	0.00093113
13060	26	4.78013e-08	0.00165725	1.58687e-08	0.000550162	1.1633e-06	0.00947906	3.82239e-07	0.00311463	-8.23531e-05	-1.06287	-2.76715e-05	-0.357135	1.73404e-06	0.0148856	5.65128e-07	0.00485124	1.14274e-06	0.0100401	3.71298e-07	0.00326219	2.21137e-07	0.00279677	7.36805e-08	0.000931855
13070	26	4.91194e-08	0.00165773	1.63063e-08	0.000550321	1.17502e-06	0.00949073	3.86089e-07	0.00311846	-8.23286e-05	-1.06369	-2.76633e-05	-0.357411	1.73822e-06	0.0149029	5.66489e-07	0.0048569	1.1266e-06	0.0100514	3.66053e-07	0.00326588	2.23472e-07	0.00279901	7.44585e-08	0.000932598
13080	26	6.08039e-08	0.00165828	2.01852e-08	0.000550502	1.18536e-06	0.00950255	3.89487e-07	0.00312235	-8.22891e-05	-1.06452	-2.765e-05	-0.357688	1.73995e-06	0.0149203	5.67056e-07	0.00486257	1.12982e-06	0.0100627	3.67098e-07	0.00326954	2.28439e-07	0.00280127	7.61133e-08	0.000933351
13090	26	7.16368e-08	0.00165895	2.37814e-08	0.000550724	1.17869e-06	0.00951438	3.87295e-07	0.00312623	-8.22682e-05	-1.06534	-2.7643e-05	-0.357964	1.74528e-06	0.0149377	5.68792e-07	0.00486825	1.13008e-06	0.010074	3.67182e-07	0.00327322	2.31347e-07	0.00280356	7.70824e-08	0.000934114
13100	26	7.25095e-08	0.00165968	2.40711e-08	0.000550966	1.18665e-06	0.00952619	3.8991e-07	0.00313012	-8.22257e-05	-1.06616	-2.76287e-05	-0.358241	1.74069e-06	0.0149552	5.67297e-07	0.00487393	1.1242e-06	0.0100852	3.65273e-07	0.00327687	2.29077e-07	0.00280588	7.63258e-08	0.000934887
13110	26	7.50074e-08	0.00166041	2.49004e-08	0.000551209	1.19552e-06	0.00953811	3.92823e-07	0.00313403	-8.21924e-05	-1.06698	-2.76175e-05	-0.358517	1.747e-06	0.0149726	5.69353e-07	0.00487961	1.11945e-06	0.0100964	3.63731e-07	0.00328052	2.16973e-07	0.0028081	7.22929e-08	0.000935629
13120	26	6.72776e-08	0.00166111	2.23343e-08	0.000551444	1.20675e-06	0.00955012	3.96512e-07	0.00313798	-8.21631e-05	-1.0678	-2.76076e-05	-0.358793	1.75431e-06	0.0149901	5.71736e-07	0.00488532	1.11215e-06	0.0101076	3.61356e-07	0.00328414	2.12876e-07	0.00281025	7.09278e-08	0.000936343
13130	26	6.41412e-08	0.00166178	2.12931e-08	0.000551664	1.21675e-06	0.00956223	3.998e-07	0.00314196	-8.21274e-05	-1.06863	-2.75956e-05	-0.359069	1.75239e-06	0.0150077	5.7111e-07	0.00489103	1.12265e-06	0.0101188	3.64768e-07	0.00328777	2.03821e-07	0.00281233	6.79109e-08	0.000937038
13140	26	5.2077e-08	0.00166236	1.72881e-08	0.000551859	1.22877e-06	0.00957448	4.03749e-07	0.00314598	-8.20915e-05	-1.06945	-2.75836e-05	-0.359345	1.75557e-06	0.0150252	5.72145e-07	0.00489675	1.11786e-06	0.01013	3.63214e-07	0.00329141	2.04843e-07	0.00281437	6.82513e-08	0.000937718
13150	26	5.36058e-08	0.00166288	1.77956e-08	0.00055203	1.21835e-06	0.00958671	4.00327e-07	0.00315	-8.20632e-05	-1.07027	-2.75741e-05	-0.359621	1.75021e-06	0.0150427	5.70398e-07	0.00490246	1.12e-06	0.0101412	3.63908e-07	0.00329505	1.92714e-07	0.00281636	6.42102e-08	0.000938381
13160	26	7.35628e-08	0.0016635	2.44208e-08	0.000552234	1.19667e-06	0.0095988	3.93203e-07	0.00315397	-8.20288e-05	-1.07109	-2.75625e-05	-0.359897	1.75622e-06	0.0150602	5.72357e-07	0.00490817	1.1246e-06	0.0101524	3.65402e-07	0.0032987	2.05266e-07	0.00281833	6.83922e-08	0.000939035
13170	26	7.58043e-08	0.00166427	2.51649e-08	0.00055249	1.18342e-06	0.00961069	3.88848e-07	0.00315788	-8.19975e-05	-1.07191	-2.7552e-05	-0.360172	1.76752e-06	0.0150779	5.7604e-07	0.00491392	1.12664e-06	0.0101636	3.66066e-07	0.00330235	2.20801e-07	0.00282046	7.35684e-08	0.000939747
13180	26	7.0787e-08	0.00166498	2.34993e-08	0.000552728	1.18047e-06	0.00962253	3.87879e-07	0.00316177	-8.19721e-05	-1.07273	-2.75435e-05	-0.360448	1.7731e-06	0.0150956	5.77858e-07	0.00491969	1.1243e-06	0.0101749	3.65306e-07	0.003306	2.28432e-07	0.00282272	7.61109e-08	0.000940499
13190	26	7.24355e-08	0.0016657	2.40466e-08	0.000552965	1.17358e-06	0.00963429	3.85615e-07	0.00316563	-8.19499e-05	-1.07355	-2.7536e-05	-0.360723	1.76787e-06	0.0151133	5.76155e-07	0.00492546	1.12266e-06	0.0101861	3.64774e-07	0.00330965	2.16226e-07	0.00282496	7.2044e-08	0.000941244
13200	26	7.53237e-08	0.00166644	2.50054e-08	0.000553213	1.18638e-06	0.00964609	3.89819e-07	0.00316951	-8.19064e-05	-1.07437	-2.75214e-05	-0.360998	1.76362e-06	0.0151309	5.74767e-07	0.00493122	1.12248e-06	0.0101974	3.64713e-07	0.0033133	2.11566e-07	0.0028271	7.04916e-08	0.000941957
13210	26	7.07568e-08	0.00166718	2.34893e-08	0.000553457	1.19454e-06	0.009658	3.92502e-07	0.00317342	-8.18661e-05	-1.07519	-2.75078e-05	-0.361273	1.75515e-06	0.0151485	5.72008e-07	0.00493695	1.12965e-06	0.0102086	3.67044e-07	0.00331695	2.12582e-07	0.00282919	7.08299e-08	0.000942654
13220	26	5.44878e-08	0.00166781	1.80884e-08	0.000553666	1.19171e-06	0.00966993	3.91572e-07	0.00317734	-8.18597e-05	-1.076	-2.75057e-05	-0.361549	1.76052e-06	0.0151661	5.73757e-07	0.00494267	1.13608e-06	0.0102199	3.69133e-07	0.00332064	2.18812e-07	0.00283136	7.29058e-08	0.000943379
13230	26	6.4595e-08	0.00166842	2.14437e-08	0.000553869	1.18344e-06	0.00968181	3.88856e-07	0.00318125	-8.1833e-05	-1.07682	-2.74967e-05	-0.361824	1.77938e-06	0.0151838	5.79904e-07	0.00494844	1.13001e-06	0.0102313	3.67159e-07	0.00332432	2.28301e-07	0.00283359	7.60675e-08	0.000944119
13240	26	6.67114e-08	0.00166907	2.21463e-08	0.000554086	1.18851e-06	0.00969368	3.9052e-07	0.00318515	-8.17953e-05	-1.07764	-2.7484e-05	-0.362098	1.77901e-06	0.0152016	5.79785e-07	0.00495424	1.13956e-06	0.0102426	3.70263e-07	0.00332801	2.40023e-07	0.00283592	7.99731e-08	0.000944899
13250	26	6.40841e-08	0.00166974	2.12742e-08	0.000554307	1.18007e-06	0.00970552	3.87749e-07	0.00318904	-8.17679e-05	-1.07846	-2.74749e-05	-0.362373	1.77833e-06	0.0152194	5.79562e-07	0.00496004	1.14748e-06	0.010254	3.72837e-07	0.00333172	2.45947e-07	0.00283837	8.19467e-08	0.000945714
13260	26	6.59668e-08	0.00167038	2.18991e-08	0.000554519	1.16754e-06	0.00971724	3.83629e-07	0.00319289	-8.1742e-05	-1.07928	-2.74661e-05	-0.362648	1.77863e-06	0.0152372	5.79661e-07	0.00496584	1.14539e-06	0.0102655	3.72159e-07	0.00333545	2.28684e-07	0.00284076	7.61951e-08	0.00094651
13270	26	6.58072e-08	0.00167105	2.18462e-08	0.000554742	1.17606e-06	0.00972895	3.86429e-07	0.00319674	-8.17106e-05	-1.08009	-2.74556e-05	-0.362923	1.77711e-06	0.0152549	5.79164e-07	0.00497162	1.14404e-06	0.010277	3.7172e-07	0.00333917	2.23894e-07	0.00284299	7.45991e-08	0.000947254
13280	26	5.68803e-08	0.00167166	1.88827e-08	0.000554946	1.18358e-06	0.00974075	3.88901e-07	0.00320061	-8.16726e-05	-1.08091	-2.74428e-05	-0.363197	1.79161e-06	0.0152728	5.83889e-07	0.00497744	1.14146e-06	0.0102884	3.70881e-07	0.00334288	2.41376e-07	0.00284531	8.04237e-08	0.000948027
13290	26	6.44751e-08	0.00167227	2.1404e-08	0.000555148	1.19051e-06	0.00975263	3.91176e-07	0.00320452	-8.16234e-05	-1.08173	-2.74263e-05	-0.363471	1.80124e-06	0.0152907	5.87028e-07	0.00498329	1.13511e-06	0.0102998	3.68817e-07	0.00334659	2.35434e-07	0.0028477	7.84439e-08	0.000948823
13300	26	8.16819e-08	0.00167302	2.71161e-08	0.000555396	1.1957e-06	0.00976455	3.92883e-07	0.00320843	-8.16018e-05	-1.08254	-2.7419e-05	-0.363746	1.79241e-06	0.0153087	5.84152e-07	0.00498916	1.13966e-06	0.0103112	3.70297e-07	0.00335029	2.35346e-07	0.00285002	7.84146e-08	0.000949596
13310	26	9.39659e-08	0.00167391	3.11941e-08	0.000555692	1.19445e-06	0.00977649	3.92472e-07	0.00321236	-8.15699e-05	-1.08336	-2.74083e-05	-0.36402	1.78663e-06	0.0153266	5.82269e-07	0.00499499	1.13436e-06	0.0103225	3.68574e-07	0.00335398	2.31541e-07	0.00285237	7.71471e-08	0.000950377
13320	26	9.35757e-08	0.00167488	3.10645e-08	0.000556013	1.20511e-06	0.0097885	3.95976e-07	0.0032163	-8.15498e-05	-1.08417	-2.74016e-05	-0.364294	1.77967e-06	0.0153445	5.8e-07	0.00500081	1.14299e-06	0.0103339	3.71377e-07	0.00335767	2.42995e-07	0.00285474	8.09632e-08	0.000951168
13330	26	8.16086e-08	0.00167576	2.70918e-08	0.000556306	1.20195e-06	0.00980053	3.94935e-07	0.00322026	-8.15277e-05	-1.08499	-2.73941e-05	-0.364568	1.7829e-06	0.0153623	5.81053e-07	0.0050066	1.13157e-06	0.0103453	3.67666e-07	0.00336137	2.29997e-07	0.00285712	7.66325e-08	0.000951962
13340	26	7.177e-08	0.00167652	2.38256e-08	0.000556558	1.20477e-06	0.00981256	3.95863e-07	0.00322421	-8.14943e-05	-1.08581	-2.73829e-05	-0.364842	1.77797e-06	0.01538	5.79445e-07	0.0050124	1.12551e-06	0.0103566	3.65698e-07	0.00336503	2.29977e-07	0.00285941	7.66258e-08	0.000952725
13350	26	8.52212e-08	0.0016773	2.82911e-08	0.000556818	1.20152e-06	0.00982459	3.94794e-07	0.00322816	-8.14623e-05	-1.08662	-2.73721e-05	-0.365115	1.78488e-06	0.0153979	5.81699e-07	0.0050182	1.11599e-06	0.0103678	3.62606e-07	0.00336867	2.19282e-07	0.00286165	7.30622e-08	0.00095347
13360	26	8.86069e-08	0.00167819	2.9415e-08	0.000557112	1.20828e-06	0.00983664	3.97015e-07	0.00323212	-8.1422e-05	-1.08743	-2.73586e-05	-0.365389	1.79075e-06	0.0154157	5.83611e-07	0.00502403	1.12508e-06	0.010379	3.65558e-07	0.00337231	2.24305e-07	0.00286386	7.4736e-08	0.000954208
13370	26	8.39074e-08	0.00167903	2.78549e-08	0.000557392	1.21053e-06	0.00984874	3.97755e-07	0.0032361	-8.13932e-05	-1.08825	-2.7349e-05	-0.365663	1.7991e-06	0.0154337	5.86333e-07	0.00502988	1.14688e-06	0.0103903	3.7264e-07	0.003376	2.43025e-07	0.00286619	8.09733e-08	0.000954984
13380	26	1.00442e-07	0.00167996	3.33439e-08	0.000557699	1.21364e-06	0.00986086	3.98779e-07	0.00324008	-8.1369e-05	-1.08906	-2.73408e-05	-0.365936	1.7999e-06	0.0154517	5.86593e-07	0.00503575	1.15477e-06	0.0104018	3.75204e-07	0.00337974	2.53175e-07	0.00286868	8.4355e-08	0.000955813
13390	26	1.01385e-07	0.00168097	3.36571e-08	0.000558036	1.20353e-06	0.00987295	3.95457e-07	0.00324405	-8.13458e-05	-1.08988	-2.7333e-05	-0.366209	1.80218e-06	0.0154697	5.87335e-07	0.00504161	1.15086e-06	0.0104134	3.73936e-07	0.00338349	2.66115e-07	0.00287128	8.86667e-08	0.000956679
13400	26	9.84146e-08	0.00168197	3.26709e-08	0.000558368	1.19717e-06	0.00988496	3.93367e-07	0.003248	-8.13265e-05	-1.09069	-2.73265e-05	-0.366483	1.79377e-06	0.0154877	5.84595e-07	0.00504748	1.15483e-06	0.0104249	3.75225e-07	0.00338723	2.68201e-07	0.00287396	8.93617e-08	0.000957572
13410	26	9.891e-08	0.00168295	3.28354e-08	0.000558693	1.1945e-06	0.00989691	3.9249e-07	0.00325192	-8.12961e-05	-1.0915	-2.73163e-05	-0.366756	1.79675e-06	0.0155056	5.85565e-07	0.00505332	1.15322e-06	0.0104364	3.74703e-07	0.00339099	2.66263e-07	0.00287662	8.87159e-08	0.000958459
13420	26	1.10411e-07	0.001684	3.66534e-08	0.000559042	1.20122e-06	0.00990888	3.94697e-07	0.00325586	-8.12625e-05	-1.09232	-2.7305e-05	-0.367029	1.79522e-06	0.0155236	5.85067e-07	0.00505918	1.14193e-06	0.0104479	3.71034e-07	0.00339472	2.62312e-07	0.00287928	8.73996e-08	0.000959345
13430	26	1.07285e-07	0.00168509	3.56158e-08	0.000559405	1.20098e-06	0.0099209	3.94619e-07	0.00325981	-8.12306e-05	-1.09313	-2.72943e-05	-0.367302	1.7916e-06	0.0155415	5.83887e-07	0.00506502	1.13171e-06	0.0104593	3.67712e-07	0.00339841	2.57107e-07	0.00288187	8.56652e-08	0.000960207
13440	26	1.16618e-07	0.00168619	3.87139e-08	0.00055977	1.19542e-06	0.00993289	3.92793e-07	0.00326375	-8.12039e-05	-1.09394	-2.72853e-05	-0.367575	1.78604e-06	0.0155594	5.82077e-07	0.00507085	1.12262e-06	0.0104706	3.6476e-07	0.00340207	2.59017e-07	0.00288444	8.63015e-08	0.000961062
13450	26	1.18318e-07	0.00168738	3.92782e-08	0.000560163	1.19167e-06	0.00994481	3.91558e-07	0.00326766	-8.11761e-05	-1.09475	-2.7276e-05	-0.367848	1.79581e-06	0.0155773	5.85261e-07	0.00507668	1.13743e-06	0.0104818	3.6957e-07	0.00340574	2.63788e-07	0.00288704	8.78912e-08	0.000961931
13460	26	1.18211e-07	0.00168856	3.92427e-08	0.000560554	1.20399e-06	0.00995679	3.95606e-07	0.0032716	-8.11474e-05	-1.09556	-2.72663e-05	-0.36812	1.81112e-06	0.0155954	5.90249e-07	0.00508257	1.14537e-06	0.0104933	3.7215e-07	0.00340945	2.78429e-07	0.00288976	9.27696e-08	0.000962837
13470	26	1.31466e-07	0.00168981	4.36431e-08	0.00056097	1.21014e-06	0.00996887	3.97628e-07	0.00327557	-8.11006e-05	-1.09637	-2.72506e-05	-0.368393	1.82731e-06	0.0156135	5.95525e-07	0.0050885	1.14286e-06	0.0105047	3.71335e-07	0.00341317	2.85556e-07	0.00289258	9.51441e-08	0.000963775
13480	26	1.21505e-07	0.0016911	4.03364e-08	0.000561397	1.21296e-06	0.00998098	3.98556e-07	0.00327955	-8.10695e-05	-1.09719	-2.72402e-05	-0.368666	1.83419e-06	0.0156319	5.97767e-07	0.00509447	1.14209e-06	0.0105161	3.71086e-07	0.00341688	2.89184e-07	0.00289547	9.6353e-08	0.000964737
13490	26	1.16254e-07	0.00169227	3.85931e-08	0.000561786	1.20864e-06	0.00999308	3.97136e-07	0.00328352	-8.10409e-05	-1.098	-2.72306e-05	-0.368938	1.82488e-06	0.0156502	5.94733e-07	0.00510044	1.16185e-06	0.0105277	3.77507e-07	0.00342063	2.87427e-07	0.00289834	9.57674e-08	0.000965694
13500	26	1.16808e-07	0.00169345	3.8777e-08	0.000562177	1.20933e-06	0.0100052	3.9736e-07	0.0032875	-8.10082e-05	-1.09881	-2.72196e-05	-0.36921	1.8185e-06	0.0156684	5.92654e-07	0.00510637	1.16744e-06	0.0105393	3.79322e-07	0.00342441	2.87704e-07	0.00290121	9.58599e-08	0.000966653
13510	26	1.05399e-07	0.00169456	3.49897e-08	0.000562546	1.21505e-06	0.0100173	3.9924e-07	0.00329148	-8.09675e-05	-1.09962	-2.72059e-05	-0.369482	1.81297e-06	0.0156865	5.90851e-07	0.00511229	1.16336e-06	0.010551	3.77997e-07	0.0034282	2.80047e-07	0.00290406	9.33085e-08	0.0009676
13520	26	1.03765e-07	0.0016956	3.44472e-08	0.000562893	1.22049e-06	0.0100295	4.01028e-07	0.00329548	-8.09382e-05	-1.10043	-2.7196e-05	-0.369754	1.81102e-06	0.0157047	5.90218e-07	0.0051182	1.16447e-06	0.0105626	3.78356e-07	0.00343198	2.83054e-07	0.00290687	9.43106e-08	0.000968536
13530	26	9.99951e-08	0.00169662	3.31956e-08	0.000563232	1.21736e-06	0.0100417	4e-07	0.00329949	-8.09125e-05	-1.10123	-2.71874e-05	-0.370026	1.80591e-06	0.0157228	5.8855e-07	0.00512409	1.16975e-06	0.0105743	3.80072e-07	0.00343577	2.93845e-07	0.00290975	9.79059e-08	0.000969495
13540	26	1.03817e-07	0.00169763	3.44643e-08	0.000563567	1.22582e-06	0.0100539	4.02779e-07	0.0033035	-8.08767e-05	-1.10204	-2.71754e-05	-0.370298	1.80774e-06	0.0157408	5.89148e-07	0.00512998	1.19048e-06	0.0105861	3.86807e-07	0.00343961	3.00531e-07	0.00291273	1.00134e-07	0.000970489
13550	26	1.01076e-07	0.00169866	3.35545e-08	0.000563907	1.21997e-06	0.0100661	4.00859e-07	0.00330753	-8.08315e-05	-1.10285	-2.71602e-05	-0.37057	1.8156e-06	0.015759	5.91709e-07	0.00513589	1.18632e-06	0.010598	3.85457e-07	0.00344347	2.9468e-07	0.00291571	9.8184e-08	0.000971481
13560	26	1.07724e-07	0.00169969	3.57614e-08	0.000564248	1.21045e-06	0.0100783	3.97729e-07	0.00331152	-8.07942e-05	-1.10366	-2.71477e-05	-0.370841	1.80636e-06	0.0157771	5.88698e-07	0.00514179	1.17937e-06	0.0106098	3.83198e-07	0.00344732	2.82749e-07	0.00291861	9.42089e-08	0.000972448
13570	26	9.40505e-08	0.00170067	3.12222e-08	0.000564576	1.2016e-06	0.0100903	3.94822e-07	0.00331548	-8.07704e-05	-1.10447	-2.71397e-05	-0.371113	1.81467e-06	0.0157952	5.91406e-07	0.00514769	1.17221e-06	0.0106216	3.80873e-07	0.00345113	2.69308e-07	0.00292136	8.97304e-08	0.000973364
13580	26	1.01605e-07	0.00170164	3.373e-08	0.000564898	1.21617e-06	0.0101024	3.99608e-07	0.00331945	-8.07385e-05	-1.10528	-2.71289e-05	-0.371384	1.83575e-06	0.0158134	5.98275e-07	0.00515363	1.18002e-06	0.0106333	3.83411e-07	0.00345495	2.63025e-07	0.00292402	8.76372e-08	0.000974251
13590	26	1.18226e-07	0.00170274	3.92478e-08	0.000565263	1.22358e-06	0.0101146	4.02044e-07	0.00332346	-8.07152e-05	-1.10608	-2.71211e-05	-0.371655	1.8301e-06	0.0158317	5.96433e-07	0.00515961	1.18052e-06	0.0106451	3.83571e-07	0.00345879	2.54795e-07	0.00292661	8.48947e-08	0.000975113
13600	26	1.17703e-07	0.00170392	3.90742e-08	0.000565654	1.21788e-06	0.0101268	4.00171e-07	0.00332747	-8.07004e-05	-1.10689	-2.71162e-05	-0.371926	1.8226e-06	0.01585	5.93991e-07	0.00516556	1.18218e-06	0.0106569	3.84112e-07	0.00346263	2.40666e-07	0.00292908	8.01874e-08	0.000975937
13610	26	1.22678e-07	0.00170512	4.07255e-08	0.000566052	1.22008e-06	0.010139	4.00893e-07	0.00333148	-8.06749e-05	-1.1077	-2.71076e-05	-0.372198	1.82558e-06	0.0158682	5.94962e-07	0.0051715	1.17856e-06	0.0106687	3.82937e-07	0.00346647	2.33568e-07	0.00293145	7.78223e-08	0.000976727
13620	26	9.85621e-08	0.00170625	3.27199e-08	0.000566428	1.22505e-06	0.0101512	4.02528e-07	0.0033355	-8.06438e-05	-1.1085	-2.70971e-05	-0.372469	1.82556e-06	0.0158865	5.94956e-07	0.00517745	1.19333e-06	0.0106806	3.87734e-07	0.00347032	2.31896e-07	0.00293379	7.7265e-08	0.000977506
13630	26	8.83885e-08	0.00170717	2.93425e-08	0.000566734	1.21074e-06	0.0101634	3.97826e-07	0.00333949	-8.0624e-05	-1.10931	-2.70905e-05	-0.372739	1.81813e-06	0.0159047	5.92535e-07	0.00518339	1.2075e-06	0.0106926	3.92338e-07	0.00347422	2.28283e-07	0.00293609	7.60615e-08	0.000978274
13640	26	9.46279e-08	0.00170809	3.14138e-08	0.000567039	1.21067e-06	0.0101755	3.97802e-07	0.00334347	-8.05868e-05	-1.11012	-2.7078e-05	-0.37301	1.81191e-06	0.0159229	5.90507e-07	0.00518931	1.21008e-06	0.0107047	3.93177e-07	0.00347815	2.3351e-07	0.0029384	7.7803e-08	0.000979043
13650	26	8.4926e-08	0.00170899	2.81931e-08	0.000567337	1.20507e-06	0.0101876	3.9596e-07	0.00334744	-8.05534e-05	-1.11092	-2.70668e-05	-0.373281	1.80805e-06	0.015941	5.89247e-07	0.0051952	1.19828e-06	0.0107167	3.89344e-07	0.00348206	2.30363e-07	0.00294073	7.67543e-08	0.000979817
13660	26	7.84428e-08	0.0017098	2.60408e-08	0.000567607	1.19241e-06	0.0101996	3.91803e-07	0.00335138	-8.05366e-05	-1.11173	-2.70611e-05	-0.373552	1.8071e-06	0.015959	5.88939e-07	0.00520109	1.19904e-06	0.0107287	3.8959e-07	0.00348595	2.38614e-07	0.00294307	7.95036e-08	0.000980598
13670	26	7.76833e-08	0.00171057	2.57887e-08	0.000567863	1.19105e-06	0.0102115	3.91355e-07	0.0033553	-8.05053e-05	-1.11253	-2.70506e-05	-0.373822	1.80838e-06	0.0159771	5.89357e-07	0.00520698	1.18402e-06	0.0107406	3.8471e-07	0.00348982	2.34431e-07	0.00294545	7.81097e-08	0.000981391
13680	26	8.97919e-08	0.00171141	2.98084e-08	0.000568142	1.19057e-06	0.0102234	3.91199e-07	0.00335921	-8.04764e-05	-1.11334	-2.70409e-05	-0.374093	1.80885e-06	0.0159952	5.8951e-07	0.00521288	1.1762e-06	0.0107524	3.82167e-07	0.00349365	2.32761e-07	0.00294777	7.75534e-08	0.000982166
13690	26	8.27308e-08	0.0017123	2.74643e-08	0.000568436	1.20071e-06	0.0102353	3.94528e-07	0.00336313	-8.04393e-05	-1.11414	-2.70284e-05	-0.374363	1.79847e-06	0.0160132	5.86125e-07	0.00521876	1.17881e-06	0.0107642	3.83018e-07	0.00349748	2.31343e-07	0.00295011	7.70809e-08	0.000982943
13700	26	7.60485e-08	0.00171308	2.5246e-08	0.000568695	1.20369e-06	0.0102474	3.95509e-07	0.00336708	-8.04083e-05	-1.11495	-2.7018e-05	-0.374633	1.79047e-06	0.0160312	5.83519e-07	0.00522461	1.17431e-06	0.010776	3.81555e-07	0.0035013	2.28481e-07	0.00295239	7.61274e-08	0.000983705
13710	26	8.68214e-08	0.00171389	2.88223e-08	0.000568964	1.20752e-06	0.0102594	3.96768e-07	0.00337104	-8.03862e-05	-1.11575	-2.70106e-05	-0.374903	1.76783e-06	0.016049	5.76139e-07	0.00523041	1.16141e-06	0.0107876	3.77362e-07	0.0035051	2.3053e-07	0.0029547	7.68099e-08	0.000984472
13720	26	9.48293e-08	0.0017148	3.14807e-08	0.000569265	1.21556e-06	0.0102715	3.9941e-07	0.00337502	-8.03658e-05	-1.11655	-2.70037e-05	-0.375174	1.76593e-06	0.0160666	5.75521e-07	0.00523616	1.16438e-06	0.0107993	3.78327e-07	0.00350887	2.18774e-07	0.00295694	7.28931e-08	0.000985218
13730	26	9.32064e-08	0.00171575	3.09419e-08	0.00056958	1.21888e-06	0.0102837	4.00499e-07	0.00337902	-8.0341e-05	-1.11736	-2.69954e-05	-0.375444	1.76447e-06	0.0160843	5.75045e-07	0.00524192	1.16564e-06	0.0108109	3.78737e-07	0.00351265	2.1515e-07	0.00295911	7.16857e-08	0.000985942
13740	26	9.00351e-08	0.00171666	2.98892e-08	0.000569883	1.22945e-06	0.0102959	4.03973e-07	0.00338304	-8.03055e-05	-1.11816	-2.69835e-05	-0.375713	1.77811e-06	0.016102	5.79491e-07	0.00524768	1.17379e-06	0.0108226	3.81385e-07	0.00351647	2.09865e-07	0.00296123	6.99246e-08	0.000986648
13750	26	8.94618e-08	0.00171758	2.96988e-08	0.00057019	1.21481e-06	0.0103082	3.99162e-07	0.00338706	-8.02807e-05	-1.11896	-2.69751e-05	-0.375983	1.78548e-06	0.0161198	5.81892e-07	0.00525349	1.18631e-06	0.0108344	3.85454e-07	0.0035203	2.16172e-07	0.00296338	7.2026e-08	0.000987364
13760	26	8.04833e-08	0.00171842	2.67182e-08	0.000570468	1.21697e-06	0.0103203	3.99871e-07	0.00339105	-8.02601e-05	-1.11977	-2.69682e-05	-0.376253	1.78181e-06	0.0161377	5.80697e-07	0.00525931	1.18432e-06	0.0108463	3.84807e-07	0.00352416	2.13277e-07	0.00296552	7.10616e-08	0.000988079
13770	26	7.30005e-08	0.0017192	2.42341e-08	0.000570727	1.2195e-06	0.0103325	4.00704e-07	0.00339506	-8.02251e-05	-1.12057	-2.69565e-05	-0.376523	1.7822e-06	0.0161555	5.80823e-07	0.00526511	1.17626e-06	0.0108581	3.82188e-07	0.00352799	2.31609e-07	0.00296772	7.71697e-08	0.000988811
13780	26	7.02441e-08	0.0017199	2.33191e-08	0.00057096	1.21723e-06	0.0103447	3.99959e-07	0.00339907	-8.01917e-05	-1.12137	-2.69452e-05	-0.376792	1.78534e-06	0.0161733	5.81848e-07	0.00527093	1.16121e-06	0.0108698	3.77299e-07	0.00353179	2.38167e-07	0.00297009	7.93545e-08	0.000989602
13790	26	8.11699e-08	0.00172065	2.69461e-08	0.000571209	1.20271e-06	0.0103568	3.95187e-07	0.00340303	-8.01601e-05	-1.12217	-2.69346e-05	-0.377061	1.78714e-06	0.0161912	5.82433e-07	0.00527674	1.16561e-06	0.0108814	3.78728e-07	0.00353556	2.36078e-07	0.00297246	7.86586e-08	0.00099039
13800	26	8.29047e-08	0.00172147	2.75221e-08	0.00057148	1.2063e-06	0.0103688	3.96368e-07	0.00340699	-8.01331e-05	-1.12297	-2.69255e-05	-0.377331	1.78819e-06	0.016209	5.82777e-07	0.00528257	1.15794e-06	0.010893	3.76236e-07	0.00353934	2.44321e-07	0.00297486	8.14051e-08	0.000991192
13810	26	9.23834e-08	0.00172234	3.06687e-08	0.00057177	1.21885e-06	0.010381	4.00488e-07	0.00341097	-8.0104e-05	-1.12378	-2.69158e-05	-0.3776	1.80603e-06	0.016227	5.88589e-07	0.00528842	1.15968e-06	0.0109046	3.76799e-07	0.00354311	2.43768e-07	0.00297731	8.12207e-08	0.000992006
13820	26	9.24088e-08	0.00172327	3.06772e-08	0.000572078	1.2274e-06	0.0103932	4.03299e-07	0.003415	-8.00793e-05	-1.12458	-2.69074e-05	-0.377869	1.80986e-06	0.0162451	5.89838e-07	0.00529432	1.16331e-06	0.0109162	3.7798e-07	0.00354688	2.34473e-07	0.00297971	7.81239e-08	0.000992806
13830	26	9.78757e-08	0.0017242	3.2492e-08	0.000572388	1.22816e-06	0.0104055	4.03549e-07	0.00341904	-8.00605e-05	-1.12538	-2.69011e-05	-0.378138	1.80372e-06	0.0162631	5.87836e-07	0.0053002	1.15989e-06	0.0109279	3.76871e-07	0.00355066	2.35275e-07	0.00298206	7.83909e-08	0.00099359
13840	26	1.07142e-07	0.00172524	3.55682e-08	0.000572732	1.23322e-06	0.0104178	4.05211e-07	0.00342308	-8.0038e-05	-1.12618	-2.68936e-05	-0.378407	1.79836e-06	0.0162812	5.8609e-07	0.00530607	1.15401e-06	0.0109394	3.74959e-07	0.00355442	2.2326e-07	0.00298436	7.43876e-08	0.000994356
13850	26	1.03301e-07	0.0017263	3.42931e-08	0.000573084	1.24005e-06	0.0104302	4.07456e-07	0.00342714	-8.00017e-05	-1.12698	-2.68814e-05	-0.378676	1.79095e-06	0.0162991	5.83675e-07	0.00531192	1.15981e-06	0.010951	3.76844e-07	0.00355817	2.23422e-07	0.00298659	7.44418e-08	0.000995098
13860	26	8.11437e-08	0.00172722	2.69375e-08	0.000573389	1.22999e-06	0.0104425	4.04151e-07	0.0034312	-7.99732e-05	-1.12778	-2.68718e-05	-0.378945	1.79731e-06	0.016317	5.85749e-07	0.00531777	1.15318e-06	0.0109626	3.74689e-07	0.00356193	2.17196e-07	0.0029888	7.23672e-08	0.000995835
13870	26	7.02496e-08	0.00172797	2.33209e-08	0.000573638	1.23708e-06	0.0104548	4.06479e-07	0.00343525	-7.99455e-05	-1.12858	-2.68625e-05	-0.379213	1.80611e-06	0.016335	5.88615e-07	0.00532364	1.16008e-06	0.0109741	3.76929e-07	0.0035657	2.17936e-07	0.00299097	7.26139e-08	0.000996558
13880	26	5.86463e-08	0.00172862	1.9469e-08	0.000573854	1.23458e-06	0.0104672	4.05658e-07	0.00343932	-7.99183e-05	-1.12938	-2.68533e-05	-0.379482	1.79681e-06	0.0163531	5.85584e-07	0.00532951	1.16973e-06	0.0109858	3.80067e-07	0.00356948	2.15782e-07	0.00299314	7.18961e-08	0.00099728
13890	26	4.34447e-08	0.00172912	1.44224e-08	0.000574021	1.22118e-06	0.0104795	4.01257e-07	0.00344335	-7.98854e-05	-1.13018	-2.68423e-05	-0.37975	1.79834e-06	0.016371	5.86083e-07	0.00533536	1.17787e-06	0.0109975	3.82711e-07	0.00357329	2.06188e-07	0.00299524	6.86996e-08	0.000997982
13900	26	4.39552e-08	0.00172956	1.45919e-08	0.000574167	1.21729e-06	0.0104917	3.99976e-07	0.00344735	-7.98704e-05	-1.13097	-2.68373e-05	-0.380019	1.79971e-06	0.016389	5.86532e-07	0.00534123	1.16706e-06	0.0110092	3.79197e-07	0.00357709	1.89309e-07	0.00299719	6.30758e-08	0.000998631
13910	26	5.20427e-08	0.00173005	1.72767e-08	0.000574328	1.21843e-06	0.0105039	4.00352e-07	0.00345136	-7.98467e-05	-1.13177	-2.68293e-05	-0.380287	1.80023e-06	0.016407	5.867e-07	0.00534709	1.16775e-06	0.0110209	3.79423e-07	0.00358088	1.97522e-07	0.00299914	6.58121e-08	0.000999279
13920	26	5.04884e-08	0.00173057	1.67608e-08	0.0005745	1.2216e-06	0.0105161	4.01395e-07	0.00345536	-7.98142e-05	-1.13257	-2.68184e-05	-0.380555	1.80883e-06	0.016425	5.89504e-07	0.00535297	1.17613e-06	0.0110326	3.82147e-07	0.00358469	2.01781e-07	0.00300112	6.72314e-08	0.000999942
13930	26	6.75099e-08	0.00173116	2.24114e-08	0.000574697	1.21745e-06	0.0105282	4.00029e-07	0.00345937	-7.97815e-05	-1.13337	-2.68074e-05	-0.380824	1.80767e-06	0.0164431	5.89124e-07	0.00535887	1.17678e-06	0.0110444	3.82356e-07	0.00358851	1.89981e-07	0.00300309	6.32995e-08	0.0010006
13940	26	8.38026e-08	0.0017319	2.78201e-08	0.000574944	1.22549e-06	0.0105404	4.0267e-07	0.00346338	-7.97563e-05	-1.13417	-2.67989e-05	-0.381092	1.79804e-06	0.0164612	5.85985e-07	0.00536474	1.17974e-06	0.0110561	3.83319e-07	0.00359234	1.80055e-07	0.00300494	5.99922e-08	0.00100121
13950	26	6.65307e-08	0.00173266	2.20863e-08	0.000575195	1.24236e-06	0.0105528	4.08215e-07	0.00346744	-7.97382e-05	-1.13496	-2.67929e-05	-0.38136	1.78961e-06	0.0164791	5.83239e-07	0.00537059	1.17538e-06	0.0110679	3.81901e-07	0.00359616	1.96616e-07	0.00300683	6.55103e-08	0.00100184
13960	26	4.98527e-08	0.00173322	1.65497e-08	0.000575382	1.23831e-06	0.0105652	4.06884e-07	0.00347152	-7.97107e-05	-1.13576	-2.67836e-05	-0.381627	1.7778e-06	0.0164969	5.79389e-07	0.0053764	1.16506e-06	0.0110796	3.7855e-07	0.00359997	2.02942e-07	0.00300883	6.7618e-08	0.00100251
13970	26	5.73828e-08	0.00173375	1.90495e-08	0.000575557	1.2336e-06	0.0105776	4.05336e-07	0.00347558	-7.96809e-05	-1.13656	-2.67736e-05	-0.381895	1.77409e-06	0.0165147	5.78181e-07	0.00538219	1.16081e-06	0.0110912	3.77167e-07	0.00360374	2.05937e-07	0.00301088	6.86159e-08	0.00100319
13980	26	6.79007e-08	0.00173438	2.25411e-08	0.000575765	1.2278e-06	0.0105899	4.03432e-07	0.00347962	-7.96462e-05	-1.13735	-2.67619e-05	-0.382163	1.75687e-06	0.0165323	5.72569e-07	0.00538794	1.16131e-06	0.0111028	3.77332e-07	0.00360751	2.10617e-07	0.00301296	7.01751e-08	0.00100389
13990	26	6.69403e-08	0.00173508	2.22223e-08	0.000575997	1.21922e-06	0.0106021	4.0061e-07	0.00348364	-7.96289e-05	-1.13815	-2.67561e-05	-0.38243	1.7666e-06	0.0165499	5.7574e-07	0.00539367	1.15357e-06	0.0111144	3.74817e-07	0.00361128	2.10665e-07	0.00301508	7.01911e-08	0.00100459
14000	26	6.13994e-08	0.00173569	2.03829e-08	0.000576201	1.22689e-06	0.0106143	4.03133e-07	0.00348766	-7.96101e-05	-1.13895	-2.67498e-05	-0.382698	1.78145e-06	0.0165677	5.80578e-07	0.00539945	1.1583e-06	0.011126	3.76353e-07	0.00361504	2.19594e-07	0.00301724	7.31663e-08	0.00100531
14010	26	7.52153e-08	0.00173639	2.49694e-08	0.000576434	1.23608e-06	0.0106267	4.06152e-07	0.00349171	-7.95863e-05	-1.13974	-2.67418e-05	-0.382965	1.79214e-06	0.0165856	5.84062e-07	0.00540528	1.15125e-06	0.0111375	3.74062e-07	0.00361879	2.1551e-07	0.00301943	7.18057e-08	0.00100604
14020	26	7.41885e-08	0.00173713	2.46285e-08	0.000576679	1.2296e-06	0.010639	4.04022e-07	0.00349575	-7.95591e-05	-1.14054	-2.67327e-05	-0.383233	1.77241e-06	0.0166034	5.77632e-07	0.00541109	1.15482e-06	0.0111491	3.75221e-07	0.00362253	1.9508e-07	0.00302148	6.49985e-08	0.00100672
14030	26	6.43033e-08	0.00173781	2.13469e-08	0.000576905	1.2328e-06	0.0106513	4.05074e-07	0.0034998	-7.95323e-05	-1.14133	-2.67237e-05	-0.3835	1.76616e-06	0.0166211	5.75595e-07	0.00541686	1.15097e-06	0.0111606	3.73971e-07	0.00362627	1.90256e-07	0.00302338	6.33911e-08	0.00100736
14040	26	7.14289e-08	0.00173849	2.37124e-08	0.000577131	1.23312e-06	0.0106636	4.0518e-07	0.00350385	-7.94956e-05	-1.14213	-2.67113e-05	-0.383767	1.76766e-06	0.0166388	5.76086e-07	0.00542262	1.15546e-06	0.0111721	3.75431e-07	0.00363002	2.00311e-07	0.00302533	6.67414e-08	0.00100801
14050	26	7.89541e-08	0.00173925	2.62106e-08	0.000577382	1.23263e-06	0.010676	4.05019e-07	0.00350791	-7.94715e-05	-1.14292	-2.67032e-05	-0.384034	1.76712e-06	0.0166564	5.75909e-07	0.00542838	1.15961e-06	0.0111837	3.76777e-07	0.00363378	2.1107e-07	0.00302738	7.0326e-08	0.00100869
14060	26	8.528e-08	0.00174006	2.83106e-08	0.000577652	1.22854e-06	0.0106883	4.03673e-07	0.00351195	-7.94466e-05	-1.14372	-2.66949e-05	-0.384301	1.76448e-06	0.0166741	5.75048e-07	0.00543413	1.15857e-06	0.0111953	3.76439e-07	0.00363755	2.2686e-07	0.00302958	7.55872e-08	0.00100942
14070	26	1.00454e-07	0.00174098	3.33478e-08	0.000577958	1.23714e-06	0.0107006	4.065e-07	0.003516	-7.94096e-05	-1.14451	-2.66824e-05	-0.384568	1.78202e-06	0.0166918	5.80767e-07	0.00543991	1.16616e-06	0.0112069	3.78905e-07	0.00364133	2.29358e-07	0.00303188	7.64194e-08	0.00101019
14080	26	9.15716e-08	0.00174193	3.03992e-08	0.000578274	1.25539e-06	0.0107131	4.12497e-07	0.0035201	-7.93851e-05	-1.14531	-2.66742e-05	-0.384835	1.78373e-06	0.0167096	5.81323e-07	0.00544572	1.16678e-06	0.0112186	3.79107e-07	0.00364512	2.21723e-07	0.00303413	7.38755e-08	0.00101094
14090	26	1.07811e-07	0.00174291	3.57901e-08	0.000578599	1.25924e-06	0.0107256	4.13761e-07	0.00352423	-7.93704e-05	-1.1461	-2.66693e-05	-0.385102	1.78563e-06	0.0167275	5.81941e-07	0.00545153	1.17826e-06	0.0112303	3.82837e-07	0.00364892	2.17774e-07	0.00303633	7.25598e-08	0.00101167
14100	26	1.12856e-07	0.00174402	3.7465e-08	0.000578967	1.2604e-06	0.0107382	4.14143e-07	0.00352837	-7.93481e-05	-1.14689	-2.66618e-05	-0.385368	1.79102e-06	0.0167453	5.83699e-07	0.00545736	1.20213e-06	0.0112422	3.90595e-07	0.0036528	2.29647e-07	0.00303856	7.65157e-08	0.00101242
14110	26	1.17134e-07	0.00174517	3.88851e-08	0.000579349	1.26299e-06	0.0107508	4.14992e-07	0.00353251	-7.93182e-05	-1.14769	-2.66517e-05	-0.385635	1.80257e-06	0.0167633	5.87461e-07	0.00546322	1.20414e-06	0.0112542	3.91247e-07	0.0036567	2.31298e-07	0.00304088	7.70659e-08	0.00101319
14120	26	1.21068e-07	0.00174635	4.01911e-08	0.000579741	1.27834e-06	0.0107635	4.20037e-07	0.00353669	-7.92915e-05	-1.14848	-2.66427e-05	-0.385901	1.79043e-06	0.0167813	5.83505e-07	0.00546908	1.1952e-06	0.0112662	3.88342e-07	0.0036606	2.34153e-07	0.00304321	7.80171e-08	0.00101396
14130	26	1.42043e-07	0.00174766	4.71542e-08	0.000580174	1.27113e-06	0.0107763	4.17667e-07	0.00354088	-7.92784e-05	-1.14927	-2.66383e-05	-0.386168	1.78257e-06	0.0167992	5.80944e-07	0.0054749	1.19908e-06	0.0112782	3.89602e-07	0.00366449	2.29979e-07	0.00304553	7.66266e-08	0.00101474
14140	26	1.40236e-07	0.00174911	4.65543e-08	0.000580657	1.26384e-06	0.010789	4.15273e-07	0.00354504	-7.92516e-05	-1.15007	-2.66293e-05	-0.386434	1.7749e-06	0.016817	5.78445e-07	0.00548069	1.19103e-06	0.0112901	3.86988e-07	0.00366837	2.3403e-07	0.00304785	7.79763e-08	0.00101551
14150	26	1.27675e-07	0.00175046	4.23846e-08	0.000581103	1.26632e-06	0.0108016	4.16086e-07	0.0035492	-7.92194e-05	-1.15086	-2.66185e-05	-0.3867	1.77527e-06	0.0168347	5.78567e-07	0.00548648	1.19601e-06	0.0113021	3.88606e-07	0.00367224	2.45375e-07	0.00305024	8.17561e-08	0.0010163
14160	26	1.30932e-07	0.00175174	4.34659e-08	0.000581528	1.27138e-06	0.0108143	4.17751e-07	0.00355336	-7.91932e-05	-1.15165	-2.66097e-05	-0.386967	1.77874e-06	0.0168525	5.79696e-07	0.00549227	1.18201e-06	0.011314	3.84057e-07	0.00367611	2.51768e-07	0.00305271	8.38863e-08	0.00101713
14170	26	1.30373e-07	0.00175305	4.32801e-08	0.000581965	1.26975e-06	0.010827	4.17213e-07	0.00355754	-7.9183e-05	-1.15244	-2.66063e-05	-0.387233	1.79579e-06	0.0168703	5.85253e-07	0.00549809	1.18064e-06	0.0113258	3.83611e-07	0.00367995	2.59243e-07	0.00305527	8.63768e-08	0.00101798
14180	26	1.54255e-07	0.00175448	5.12083e-08	0.000582437	1.27433e-06	0.0108397	4.18721e-07	0.00356172	-7.91602e-05	-1.15323	-2.65986e-05	-0.387499	1.80186e-06	0.0168883	5.8723e-07	0.00550395	1.19847e-06	0.0113377	3.89404e-07	0.00368381	2.60559e-07	0.00305787	8.68154e-08	0.00101885
14190	26	1.54341e-07	0.00175605	5.12368e-08	0.000582959	1.27156e-06	0.0108525	4.17809e-07	0.0035659	-7.91357e-05	-1.15403	-2.65904e-05	-0.387765	1.8109e-06	0.0169064	5.90178e-07	0.00550984	1.20105e-06	0.0113497	3.90242e-07	0.00368772	2.60505e-07	0.00306048	8.67975e-08	0.00101972
14200	26	1.58114e-07	0.00175761	5.24896e-08	0.000583476	1.27293e-06	0.0108652	4.18259e-07	0.00357008	-7.91112e-05	-1.15482	-2.65822e-05	-0.38803	1.82434e-06	0.0169245	5.94558e-07	0.00551575	1.19549e-06	0.0113617	3.88437e-07	0.00369161	2.53705e-07	0.00306304	8.45317e-08	0.00102057
14210	26	1.63074e-07	0.00175923	5.41362e-08	0.000584016	1.27407e-06	0.0108779	4.18635e-07	0.00357427	-7.91018e-05	-1.15561	-2.6579e-05	-0.388296	1.82806e-06	0.0169428	5.95771e-07	0.00552171	1.19104e-06	0.0113736	3.86989e-07	0.00369548	2.62248e-07	0.00306561	8.7378e-08	0.00102143
14220	26	1.63466e-07	0.00176086	5.42663e-08	0.000584557	1.25911e-06	0.0108906	4.13719e-07	0.00357843	-7.90761e-05	-1.1564	-2.65704e-05	-0.388562	1.82618e-06	0.0169611	5.95156e-07	0.00552766	1.19675e-06	0.0113855	3.88845e-07	0.00369936	2.72313e-07	0.00306826	9.07317e-08	0.00102231
14230	26	1.77617e-07	0.00176257	5.89639e-08	0.000585124	1.26335e-06	0.0109032	4.15111e-07	0.00358257	-7.90442e-05	-1.15719	-2.65597e-05	-0.388828	1.81727e-06	0.0169793	5.92254e-07	0.0055336	1.20467e-06	0.0113975	3.9142e-07	0.00370325	2.73137e-07	0.00307099	9.10063e-08	0.00102322
14240	26	1.73539e-07	0.00176433	5.76101e-08	0.00058571	1.28034e-06	0.0109159	4.20694e-07	0.00358676	-7.90231e-05	-1.15798	-2.65526e-05	-0.389093	1.81643e-06	0.0169975	5.91979e-07	0.00553953	1.20619e-06	0.0114096	3.91912e-07	0.00370718	2.76585e-07	0.00307374	9.21551e-08	0.00102414
14250	26	1.60223e-07	0.001766	5.31895e-08	0.000586264	1.2825e-06	0.0109287	4.21404e-07	0.00359097	-7.9008e-05	-1.15877	-2.65475e-05	-0.389359	1.80232e-06	0.0170156	5.87379e-07	0.00554542	1.20326e-06	0.0114216	3.9096e-07	0.00371109	2.87527e-07	0.00307655	9.58009e-08	0.00102507
14260	26	1.65409e-07	0.00176762	5.49113e-08	0.000586801	1.28497e-06	0.0109416	4.22217e-07	0.00359518	-7.89743e-05	-1.15956	-2.65362e-05	-0.389624	1.80166e-06	0.0170336	5.87166e-07	0.00555129	1.1911e-06	0.0114336	3.87011e-07	0.00371498	2.76932e-07	0.0030794	9.22708e-08	0.00102602
14270	26	1.75244e-07	0.00176933	5.81761e-08	0.000587367	1.28603e-06	0.0109544	4.22562e-07	0.00359941	-7.89457e-05	-1.16035	-2.65266e-05	-0.389889	1.81817e-06	0.0170517	5.92547e-07	0.00555719	1.19438e-06	0.0114455	3.88074e-07	0.00371886	2.78963e-07	0.00308217	9.29474e-08	0.00102695
14280	26	1.85856e-07	0.00177113	6.16991e-08	0.000587967	1.28002e-06	0.0109673	4.20589e-07	0.00360363	-7.89166e-05	-1.16114	-2.65168e-05	-0.390155	1.83376e-06	0.01707	5.97626e-07	0.00556314	1.20195e-06	0.0114575	3.90534e-07	0.00372275	2.85322e-07	0.00308499	9.5066e-08	0.00102789
14290	26	1.9891e-07	0.00177305	6.60326e-08	0.000588603	1.27454e-06	0.01098	4.18788e-07	0.00360782	-7.88916e-05	-1.16193	-2.65084e-05	-0.39042	1.82329e-06	0.0170882	5.94216e-07	0.0055691	1.19516e-06	0.0114695	3.8833e-07	0.00372665	2.99262e-07	0.00308792	9.97108e-08	0.00102886
14300	26	1.91362e-07	0.00177502	6.35269e-08	0.000589256	1.27043e-06	0.0109928	4.17439e-07	0.00361201	-7.88706e-05	-1.16272	-2.65013e-05	-0.390685	1.82123e-06	0.0171064	5.93545e-07	0.00557504	1.19385e-06	0.0114814	3.87904e-07	0.00373053	3.00118e-07	0.00309092	9.99959e-08	0.00102986
14310	26	1.76941e-07	0.00177685	5.87395e-08	0.000589863	1.275e-06	0.0110055	4.18938e-07	0.00361618	-7.8843e-05	-1.16351	-2.6492e-05	-0.39095	1.83687e-06	0.0171248	5.9864e-07	0.005581	1.20827e-06	0.0114934	3.9259e-07	0.00373443	3.04959e-07	0.00309394	1.01609e-07	0.00103087
14320	26	1.73573e-07	0.0017786	5.76215e-08	0.000590445	1.27855e-06	0.0110183	4.20107e-07	0.00362039	-7.88353e-05	-1.16429	-2.64895e-05	-0.391215	1.83407e-06	0.0171431	5.97727e-07	0.00558699	1.22639e-06	0.0115056	3.98475e-07	0.00373838	3.03703e-07	0.00309698	1.0119e-07	0.00103188
14330	26	1.63984e-07	0.00178029	5.4438e-08	0.000591006	1.26837e-06	0.011031	4.16761e-07	0.00362457	-7.88105e-05	-1.16508	-2.64811e-05	-0.39148	1.82476e-06	0.0171614	5.94694e-07	0.00559294	1.21715e-06	0.0115179	3.95473e-07	0.00374236	3.06705e-07	0.00310005	1.02191e-07	0.0010329
14340	26	1.64722e-07	0.00178191	5.46831e-08	0.000591546	1.27516e-06	0.0110437	4.18991e-07	0.00362875	-7.87883e-05	-1.16587	-2.64737e-05	-0.391744	1.82059e-06	0.0171796	5.93336e-07	0.00559888	1.2089e-06	0.01153	3.92794e-07	0.00374629	3.16397e-07	0.00310317	1.0542e-07	0.00103394
14350	26	1.66285e-07	0.00178355	5.52022e-08	0.00059209	1.27657e-06	0.0110565	4.19455e-07	0.00363294	-7.87701e-05	-1.16666	-2.64676e-05	-0.392009	1.80415e-06	0.0171977	5.87978e-07	0.00560479	1.20319e-06	0.011542	3.90938e-07	0.00375021	3.18488e-07	0.00310632	1.06117e-07	0.00103499
14360	26	1.60546e-07	0.0017852	5.32969e-08	0.000592635	1.27996e-06	0.0110693	4.20568e-07	0.00363714	-7.87485e-05	-1.16745	-2.64603e-05	-0.392274	1.79627e-06	0.0172157	5.85408e-07	0.00561065	1.19413e-06	0.011554	3.87994e-07	0.00375411	3.1969e-07	0.00310952	1.06517e-07	0.00103606
14370	26	1.56907e-07	0.00178677	5.20889e-08	0.000593158	1.27418e-06	0.011082	4.18668e-07	0.00364134	-7.87205e-05	-1.16823	-2.64509e-05	-0.392538	1.79919e-06	0.0172337	5.86361e-07	0.00561651	1.19232e-06	0.0115659	3.87407e-07	0.00375798	3.15691e-07	0.0031127	1.05185e-07	0.00103712
14380	26	1.55142e-07	0.00178831	5.1503e-08	0.000593668	1.2843e-06	0.0110948	4.21995e-07	0.00364554	-7.86837e-05	-1.16902	-2.64385e-05	-0.392803	1.78438e-06	0.0172516	5.81533e-07	0.00562235	1.2021e-06	0.0115779	3.90584e-07	0.00376187	3.07396e-07	0.00311579	1.02421e-07	0.00103815
14390	26	1.66391e-07	0.00178993	5.52372e-08	0.000594206	1.28959e-06	0.0111077	4.23732e-07	0.00364977	-7.86551e-05	-1.16981	-2.64289e-05	-0.393067	1.78169e-06	0.0172695	5.80657e-07	0.00562816	1.20106e-06	0.0115899	3.90246e-07	0.00376577	3.10621e-07	0.00311887	1.03495e-07	0.00103917
14400	26	1.74017e-07	0.00179162	5.77689e-08	0.000594767	1.29575e-06	0.0111206	4.25758e-07	0.00365402	-7.86328e-05	-1.17059	-2.64214e-05	-0.393331	1.80057e-06	0.0172873	5.86811e-07	0.00563399	1.20137e-06	0.0116019	3.90347e-07	0.00376967	3.05954e-07	0.00312197	1.0194e-07	0.00104021
14410	26	1.81705e-07	0.00179341	6.0321e-08	0.000595361	1.30174e-06	0.0111336	4.27727e-07	0.00365829	-7.86102e-05	-1.17138	-2.64138e-05	-0.393595	1.80377e-06	0.0173054	5.87855e-07	0.00563987	1.20021e-06	0.0116139	3.8997e-07	0.00377358	2.92283e-07	0.00312496	9.73856e-08	0.0010412
14420	26	1.67302e-07	0.00179516	5.55397e-08	0.000595944	1.30063e-06	0.0111467	4.27359e-07	0.00366257	-7.86015e-05	-1.17217	-2.64109e-05	-0.39386	1.80173e-06	0.0173234	5.8719e-07	0.00564575	1.18174e-06	0.0116259	3.83969e-07	0.00377745	2.87651e-07	0.00312785	9.58421e-08	0.00104216
14430	26	1.51711e-07	0.00179675	5.03638e-08	0.00059647	1.29231e-06	0.0111596	4.24628e-07	0.00366683	-7.85866e-05	-1.17295	-2.64059e-05	-0.394124	1.79209e-06	0.0173414	5.84049e-07	0.00565161	1.1752e-06	0.0116376	3.81842e-07	0.00378127	2.73161e-07	0.00313066	9.10141e-08	0.0010431
14440	26	1.48973e-07	0.00179826	4.9455e-08	0.000596972	1.29798e-06	0.0111726	4.2649e-07	0.00367108	-7.85563e-05	-1.17374	-2.63957e-05	-0.394388	1.78453e-06	0.0173593	5.81582e-07	0.00565744	1.19502e-06	0.0116495	3.88284e-07	0.00378512	2.82351e-07	0.00313344	9.40764e-08	0.00104403
14450	26	1.51126e-07	0.00179977	5.01696e-08	0.000597475	1.29561e-06	0.0111855	4.2571e-07	0.00367534	-7.85308e-05	-1.17452	-2.63871e-05	-0.394652	1.78317e-06	0.0173771	5.8114e-07	0.00566325	1.18408e-06	0.0116614	3.84728e-07	0.00378898	2.77057e-07	0.00313624	9.23123e-08	0.00104496
14460	26	1.44374e-07	0.00180126	4.79282e-08	0.000597967	1.28172e-06	0.0111984	4.21147e-07	0.00367958	-7.851e-05	-1.17531	-2.63802e-05	-0.394915	1.7852e-06	0.0173949	5.81803e-07	0.00566906	1.18695e-06	0.0116732	3.8566e-07	0.00379284	2.72917e-07	0.00313897	9.09331e-08	0.00104587
14470	26	1.50033e-07	0.00180273	4.98067e-08	0.000598455	1.2795e-06	0.0112112	4.20419e-07	0.00368378	-7.84959e-05	-1.17609	-2.63754e-05	-0.395179	1.78787e-06	0.0174128	5.82672e-07	0.00567488	1.19436e-06	0.0116851	3.88068e-07	0.00379671	2.82541e-07	0.00314175	9.41394e-08	0.0010468
14480	26	1.43842e-07	0.0018042	4.77515e-08	0.000598946	1.27812e-06	0.011224	4.19963e-07	0.00368799	-7.84717e-05	-1.17688	-2.63673e-05	-0.395443	1.78133e-06	0.0174307	5.80539e-07	0.0056807	1.19583e-06	0.0116971	3.88548e-07	0.00380059	2.93019e-07	0.00314463	9.76306e-08	0.00104775
14490	26	1.30289e-07	0.00180555	4.32524e-08	0.000599392	1.2779e-06	0.0112368	4.19892e-07	0.00369219	-7.84676e-05	-1.17766	-2.63659e-05	-0.395707	1.78141e-06	0.0174485	5.80566e-07	0.00568651	1.19463e-06	0.011709	3.88157e-07	0.00380447	2.86799e-07	0.00314751	9.55581e-08	0.00104872
14500	26	1.36563e-07	0.00180686	4.53351e-08	0.000599829	1.28433e-06	0.0112496	4.22004e-07	0.0036964	-7.84531e-05	-1.17845	-2.6361e-05	-0.39597	1.77959e-06	0.0174663	5.79972e-07	0.00569232	1.19708e-06	0.011721	3.88952e-07	0.00380836	2.8782e-07	0.00315041	9.58985e-08	0.00104968
14510	26	1.39413e-07	0.00180825	4.62811e-08	0.000600288	1.27633e-06	0.0112624	4.19375e-07	0.00370061	-7.84308e-05	-1.17923	-2.63535e-05	-0.396234	1.77233e-06	0.0174841	5.77606e-07	0.0056981	1.19833e-06	0.011733	3.8936e-07	0.00381225	2.85912e-07	0.00315327	9.52627e-08	0.00105063
14520	26	1.49621e-07	0.0018097	4.96699e-08	0.000600771	1.26174e-06	0.0112751	4.14582e-07	0.00370478	-7.84066e-05	-1.18002	-2.63454e-05	-0.396497	1.7674e-06	0.0175018	5.76e-07	0.00570387	1.19792e-06	0.0117449	3.89226e-07	0.00381614	2.87892e-07	0.00315614	9.59225e-08	0.00105159
14530	26	1.56623e-07	0.00181123	5.19946e-08	0.000601279	1.26116e-06	0.0112878	4.14392e-07	0.00370893	-7.83896e-05	-1.1808	-2.63397e-05	-0.396761	1.75808e-06	0.0175194	5.72962e-07	0.00570962	1.19824e-06	0.0117569	3.89331e-07	0.00382004	2.88414e-07	0.00315902	9.60963e-08	0.00105255
14540	26	1.40128e-07	0.00181273	4.65188e-08	0.000601775	1.25091e-06	0.0113003	4.11025e-07	0.00371306	-7.83662e-05	-1.18158	-2.63318e-05	-0.397024	1.74559e-06	0.0175369	5.68891e-07	0.00571533	1.19715e-06	0.0117689	3.88975e-07	0.00382392	2.87154e-07	0.00316189	9.56767e-08	0.00105351
14550	26	1.43914e-07	0.00181416	4.77753e-08	0.00060225	1.25501e-06	0.0113128	4.12371e-07	0.00371717	-7.83472e-05	-1.18237	-2.63255e-05	-0.397287	1.75706e-06	0.0175544	5.72631e-07	0.00572103	1.19782e-06	0.0117809	3.89194e-07	0.00382782	2.82238e-07	0.00316475	9.40385e-08	0.00105446
14560	26	1.29581e-07	0.00181552	4.30174e-08	0.000602702	1.25256e-06	0.0113254	4.11567e-07	0.00372129	-7.83147e-05	-1.18315	-2.63145e-05	-0.397551	1.75598e-06	0.017572	5.72279e-07	0.00572676	1.18774e-06	0.0117928	3.85917e-07	0.00383169	2.86625e-07	0.00316759	9.55002e-08	0.00105541
14570	26	1.14192e-07	0.00181673	3.79086e-08	0.000603105	1.25571e-06	0.0113379	4.12602e-07	0.00372541	-7.8281e-05	-1.18393	-2.63032e-05	-0.397814	1.75073e-06	0.0175895	5.70567e-07	0.00573247	1.1882e-06	0.0118047	3.86069e-07	0.00383554	2.97679e-07	0.00317053	9.91835e-08	0.00105639
14580	26	1.17563e-07	0.00181791	3.90278e-08	0.000603496	1.2571e-06	0.0113505	4.13059e-07	0.00372954	-7.82582e-05	-1.18472	-2.62956e-05	-0.398077	1.75134e-06	0.017607	5.70767e-07	0.00573818	1.18861e-06	0.0118165	3.86201e-07	0.00383941	2.83379e-07	0.00317343	9.44186e-08	0.00105735
14590	26	1.11124e-07	0.00181903	3.68901e-08	0.000603869	1.25543e-06	0.011363	4.12509e-07	0.00373367	-7.8236e-05	-1.1855	-2.62881e-05	-0.39834	1.7603e-06	0.0176246	5.73686e-07	0.0057439	1.1945e-06	0.0118285	3.88113e-07	0.00384328	2.87152e-07	0.00317627	9.5676e-08	0.0010583
14600	26	1.12301e-07	0.00182015	3.72808e-08	0.000604239	1.24592e-06	0.0113755	4.09385e-07	0.00373778	-7.82194e-05	-1.18628	-2.62825e-05	-0.398602	1.75406e-06	0.0176421	5.71654e-07	0.00574962	1.19464e-06	0.0118404	3.8816e-07	0.00384716	2.96033e-07	0.00317919	9.8635e-08	0.00105927
14610	26	1.19319e-07	0.00182131	3.96105e-08	0.000604624	1.24985e-06	0.011388	4.10677e-07	0.00374187	-7.819e-05	-1.18706	-2.62727e-05	-0.398865	1.75913e-06	0.0176597	5.73306e-07	0.00575535	1.17934e-06	0.0118523	3.8319e-07	0.00385103	2.84962e-07	0.00318211	9.4946e-08	0.00106024
14620	26	1.22476e-07	0.00182251	4.06587e-08	0.000605023	1.2598e-06	0.0114006	4.13944e-07	0.003746	-7.81613e-05	-1.18784	-2.6263e-05	-0.399128	1.76749e-06	0.0176774	5.7603e-07	0.0057611	1.17441e-06	0.0118641	3.81586e-07	0.00385485	2.80503e-07	0.00318494	9.34606e-08	0.00106119
14630	26	9.73665e-08	0.00182359	3.2323e-08	0.000605381	1.24678e-06	0.0114131	4.09666e-07	0.00375012	-7.8136e-05	-1.18863	-2.62545e-05	-0.39939	1.78065e-06	0.0176951	5.80319e-07	0.00576688	1.17823e-06	0.0118758	3.82827e-07	0.00385867	2.70521e-07	0.00318771	9.01346e-08	0.00106211
14640	26	9.84993e-08	0.00182456	3.2699e-08	0.000605702	1.24065e-06	0.0114255	4.07652e-07	0.0037542	-7.81312e-05	-1.18941	-2.62529e-05	-0.399653	1.77583e-06	0.0177129	5.78748e-07	0.00577267	1.1757e-06	0.0118876	3.82008e-07	0.00386249	2.67964e-07	0.0031904	8.92828e-08	0.00106301
14650	26	8.22991e-08	0.00182543	2.7321e-08	0.000605992	1.25579e-06	0.011438	4.12627e-07	0.0037583	-7.80948e-05	-1.19019	-2.62407e-05	-0.399915	1.78127e-06	0.0177307	5.80519e-07	0.00577847	1.18235e-06	0.0118994	3.84165e-07	0.00386632	2.60185e-07	0.00319304	8.66909e-08	0.00106389
14660	26	8.99262e-08	0.0018263	2.9853e-08	0.000606282	1.25221e-06	0.0114505	4.1145e-07	0.00376242	-7.80835e-05	-1.19097	-2.62368e-05	-0.400178	1.77992e-06	0.0177485	5.80081e-07	0.00578428	1.18665e-06	0.0119112	3.85565e-07	0.00387017	2.60978e-07	0.00319565	8.69549e-08	0.00106475
14670	26	9.58066e-08	0.00182724	3.18051e-08	0.000606592	1.26035e-06	0.0114631	4.14125e-07	0.00376655	-7.80715e-05	-1.19175	-2.62328e-05	-0.40044	1.76379e-06	0.0177662	5.74825e-07	0.00579005	1.17893e-06	0.0119231	3.83056e-07	0.00387402	2.62504e-07	0.00319827	8.74635e-08	0.00106563
14680	26	8.61967e-08	0.00182816	2.86149e-08	0.000606899	1.2723e-06	0.0114758	4.18052e-07	0.0037707	-7.80405e-05	-1.19253	-2.62224e-05	-0.400702	1.7572e-06	0.0177838	5.72676e-07	0.00579578	1.17555e-06	0.0119348	3.81959e-07	0.00387784	2.54536e-07	0.00320087	8.48087e-08	0.00106649
14690	26	7.89871e-08	0.00182897	2.62215e-08	0.000607166	1.27775e-06	0.0114885	4.19844e-07	0.0037749	-7.8008e-05	-1.19331	-2.62115e-05	-0.400965	1.76306e-06	0.0178014	5.74588e-07	0.00580152	1.18042e-06	0.0119466	3.83539e-07	0.00388167	2.43699e-07	0.00320335	8.11977e-08	0.00106732
14700	26	8.65382e-08	0.0018298	2.87283e-08	0.000607441	1.27063e-06	0.0115013	4.17502e-07	0.00377908	-7.79742e-05	-1.19409	-2.62001e-05	-0.401227	1.77183e-06	0.0178191	5.77443e-07	0.00580729	1.1763e-06	0.0119584	3.82202e-07	0.0038855	2.39954e-07	0.00320579	7.99501e-08	0.00106813
14710	26	8.14488e-08	0.00183064	2.70387e-08	0.000607721	1.2798e-06	0.011514	4.20517e-07	0.00378327	-7.79446e-05	-1.19487	-2.61902e-05	-0.401489	1.76571e-06	0.0178368	5.75451e-07	0.00581305	1.19469e-06	0.0119702	3.88177e-07	0.00388935	2.20967e-07	0.0032081	7.36236e-08	0.0010689
14720	26	9.14527e-08	0.00183149	3.03598e-08	0.000608005	1.27081e-06	0.0115268	4.17563e-07	0.00378746	-7.79168e-05	-1.19565	-2.61808e-05	-0.401751	1.76887e-06	0.0178544	5.7648e-07	0.00581881	1.20317e-06	0.0119822	3.90931e-07	0.00389324	2.15173e-07	0.00321028	7.16932e-08	0.00106963
14730	26	9.09541e-08	0.00183241	3.01942e-08	0.000608308	1.26406e-06	0.0115394	4.15345e-07	0.00379163	-7.78882e-05	-1.19643	-2.61712e-05	-0.402012	1.77069e-06	0.0178721	5.77073e-07	0.00582458	1.2e-06	0.0119943	3.89902e-07	0.00389715	2.13319e-07	0.00321242	7.10756e-08	0.00107034
14740	26	9.186e-08	0.00183332	3.0495e-08	0.000608611	1.26216e-06	0.0115521	4.14721e-07	0.00379578	-7.78588e-05	-1.19721	-2.61613e-05	-0.402274	1.76471e-06	0.0178898	5.75124e-07	0.00583034	1.19745e-06	0.0120062	3.89072e-07	0.00390104	2.26446e-07	0.0032146	7.54491e-08	0.00107107
14750	26	8.38354e-08	0.0018342	2.7831e-08	0.000608905	1.27149e-06	0.0115647	4.17786e-07	0.00379994	-7.78497e-05	-1.19799	-2.61583e-05	-0.402536	1.76947e-06	0.0179075	5.76676e-07	0.0058361	1.20121e-06	0.0120182	3.90296e-07	0.00390494	2.31436e-07	0.0032169	7.71118e-08	0.00107183
14760	26	7.44087e-08	0.00183499	2.47016e-08	0.000609165	1.26829e-06	0.0115774	4.16733e-07	0.00380412	-7.78335e-05	-1.19876	-2.61528e-05	-0.402797	1.78584e-06	0.0179252	5.8201e-07	0.00584189	1.19337e-06	0.0120302	3.87746e-07	0.00390883	2.4096e-07	0.00321925	8.02851e-08	0.00107262
14770	26	7.99781e-08	0.00183579	2.65505e-08	0.000609431	1.27021e-06	0.0115901	4.17367e-07	0.00380828	-7.78165e-05	-1.19954	-2.61471e-05	-0.403059	1.77857e-06	0.0179431	5.79641e-07	0.00584769	1.19092e-06	0.0120421	3.8695e-07	0.0039127	2.40665e-07	0.00322166	8.0187e-08	0.00107342
14780	26	7.30919e-08	0.00183657	2.42645e-08	0.000609691	1.26496e-06	0.0116028	4.15639e-07	0.00381245	-7.77966e-05	-1.20032	-2.61404e-05	-0.40332	1.78991e-06	0.0179609	5.83338e-07	0.00585351	1.19834e-06	0.0120541	3.89361e-07	0.00391658	2.5038e-07	0.00322413	8.34239e-08	0.00107424
14790	26	7.9914e-08	0.00183734	2.65292e-08	0.000609945	1.24848e-06	0.0116154	4.10225e-07	0.00381658	-7.77729e-05	-1.2011	-2.61325e-05	-0.403581	1.78107e-06	0.0179788	5.80454e-07	0.00585933	1.19413e-06	0.012066	3.87996e-07	0.00392047	2.54808e-07	0.00322665	8.48991e-08	0.00107509
14800	26	8.7549e-08	0.00183817	2.90638e-08	0.000610223	1.24358e-06	0.0116278	4.08615e-07	0.00382067	-7.77598e-05	-1.20188	-2.61281e-05	-0.403843	1.7657e-06	0.0179965	5.75445e-07	0.00586511	1.19053e-06	0.012078	3.86825e-07	0.00392435	2.47703e-07	0.00322917	8.25318e-08	0.00107592
14810	26	8.97333e-08	0.00183905	2.9789e-08	0.000610513	1.24061e-06	0.0116402	4.0764e-07	0.00382475	-7.77313e-05	-1.20265	-2.61185e-05	-0.404104	1.766e-06	0.0180141	5.75545e-07	0.00587085	1.18011e-06	0.0120898	3.8344e-07	0.0039282	2.50966e-07	0.00323165	8.36192e-08	0.00107675
14820	26	9.55355e-08	0.00183997	3.17151e-08	0.000610817	1.22981e-06	0.0116526	4.04091e-07	0.00382881	-7.77044e-05	-1.20343	-2.61095e-05	-0.404365	1.77148e-06	0.0180318	5.7733e-07	0.00587662	1.18156e-06	0.0121016	3.8391e-07	0.00393203	2.53276e-07	0.00323417	8.43887e-08	0.00107759
14830	26	1.00905e-07	0.00184096	3.34977e-08	0.000611149	1.23119e-06	0.0116649	4.04543e-07	0.00383284	-7.7676e-05	-1.20421	-2.60999e-05	-0.404626	1.76245e-06	0.0180495	5.74386e-07	0.00588237	1.18418e-06	0.0121135	3.84762e-07	0.00393588	2.65958e-07	0.00323677	8.86143e-08	0.00107846
14840	26	1.08377e-07	0.00184201	3.59782e-08	0.000611496	1.24331e-06	0.0116773	4.08528e-07	0.00383692	-7.76458e-05	-1.20498	-2.60898e-05	-0.404887	1.75567e-06	0.0180671	5.72176e-07	0.00588811	1.18127e-06	0.0121253	3.83815e-07	0.00393972	2.75035e-07	0.00323947	9.16385e-08	0.00107936
14850	26	1.02566e-07	0.00184308	3.40491e-08	0.00061185	1.23895e-06	0.0116897	4.07093e-07	0.003841	-7.76287e-05	-1.20576	-2.6084e-05	-0.405148	1.75723e-06	0.0180846	5.72685e-07	0.00589383	1.18912e-06	0.0121371	3.86367e-07	0.00394357	2.75715e-07	0.00324225	9.18654e-08	0.00108028
14860	26	8.67036e-08	0.00184402	2.87832e-08	0.000612164	1.22762e-06	0.011702	4.03373e-07	0.00384505	-7.76159e-05	-1.20654	-2.60797e-05	-0.405409	1.76306e-06	0.0181022	5.74584e-07	0.00589956	1.19289e-06	0.012149	3.87593e-07	0.00394744	2.59244e-07	0.00324492	8.63772e-08	0.00108117
14870	26	8.65268e-08	0.00184488	2.87245e-08	0.000612448	1.24155e-06	0.0117144	4.07948e-07	0.00384911	-7.75948e-05	-1.20731	-2.60726e-05	-0.40567	1.77003e-06	0.0181199	5.76858e-07	0.00590532	1.19501e-06	0.012161	3.8828e-07	0.00395132	2.63595e-07	0.00324753	8.78269e-08	0.00108204
14880	26	9.10188e-08	0.00184577	3.02157e-08	0.000612744	1.23739e-06	0.0117268	4.0658e-07	0.00385319	-7.75744e-05	-1.20809	-2.60658e-05	-0.40593	1.77127e-06	0.0181376	5.7726e-07	0.00591109	1.19381e-06	0.0121729	3.8789e-07	0.0039552	2.55947e-07	0.00325012	8.52786e-08	0.0010829
14890	26	9.05664e-08	0.00184666	3.00655e-08	0.000613039	1.2244e-06	0.0117391	4.02314e-07	0.00385722	-7.75504e-05	-1.20886	-2.60577e-05	-0.406191	1.77138e-06	0.0181553	5.77298e-07	0.00591686	1.19596e-06	0.0121849	3.8859e-07	0.00395908	2.53279e-07	0.00325265	8.43899e-08	0.00108375
14900	26	1.01307e-07	0.00184762	3.3631e-08	0.000613359	1.22639e-06	0.0117513	4.02966e-07	0.00386125	-7.75159e-05	-1.20964	-2.60461e-05	-0.406451	1.76793e-06	0.018173	5.76172e-07	0.00592264	1.18794e-06	0.0121968	3.85982e-07	0.00396295	2.59357e-07	0.00325521	8.64148e-08	0.0010846
14910	26	9.36311e-08	0.00184858	3.10829e-08	0.000613678	1.22625e-06	0.0117636	4.02922e-07	0.00386528	-7.74797e-05	-1.21041	-2.6034e-05	-0.406712	1.77364e-06	0.0181907	5.78034e-07	0.0059284	1.1835e-06	0.0122086	3.84542e-07	0.0039668	2.46295e-07	0.00325776	8.20629e-08	0.00108545
14920	26	9.59782e-08	0.00184952	3.18621e-08	0.000613988	1.2271e-06	0.0117759	4.03201e-07	0.00386931	-7.74594e-05	-1.21119	-2.60271e-05	-0.406972	1.76848e-06	0.0182084	5.76353e-07	0.00593418	1.16899e-06	0.0122204	3.79825e-07	0.00397063	2.44401e-07	0.0032602	8.14316e-08	0.00108626
14930	26	1.01134e-07	0.00185052	3.35736e-08	0.00061432	1.21818e-06	0.0117881	4.00269e-07	0.00387333	-7.74124e-05	-1.21196	-2.60114e-05	-0.407232	1.7735e-06	0.0182262	5.77988e-07	0.00593995	1.17358e-06	0.0122321	3.81318e-07	0.00397443	2.46794e-07	0.00326267	8.22289e-08	0.00108708
14940	26	8.54864e-08	0.00185145	2.83791e-08	0.00061463	1.22436e-06	0.0118003	4.023e-07	0.00387734	-7.73844e-05	-1.21274	-2.60019e-05	-0.407492	1.78035e-06	0.0182439	5.8022e-07	0.00594574	1.16173e-06	0.0122438	3.77467e-07	0.00397823	2.33026e-07	0.00326506	7.76416e-08	0.00108788
14950	26	7.58556e-08	0.00185226	2.5182e-08	0.0006149	1.23106e-06	0.0118126	4.045e-07	0.00388137	-7.73579e-05	-1.21351	-2.5993e-05	-0.407752	1.76033e-06	0.0182617	5.73695e-07	0.00595152	1.16081e-06	0.0122554	3.77167e-07	0.003982	2.32355e-07	0.0032674	7.7418e-08	0.00108866
14960	26	7.978e-08	0.00185304	2.64847e-08	0.000615159	1.23951e-06	0.0118249	4.07277e-07	0.00388543	-7.732e-05	-1.21428	-2.59803e-05	-0.408012	1.76625e-06	0.0182793	5.75626e-07	0.00595727	1.16373e-06	0.012267	3.78115e-07	0.00398578	2.21921e-07	0.00326968	7.39415e-08	0.00108942
14970	26	8.36841e-08	0.00185385	2.77808e-08	0.000615428	1.24076e-06	0.0118373	4.0769e-07	0.00388951	-7.72945e-05	-1.21506	-2.59717e-05	-0.408272	1.75987e-06	0.0182969	5.73547e-07	0.00596302	1.17172e-06	0.0122787	3.80714e-07	0.00398958	2.17471e-07	0.00327186	7.2459e-08	0.00109015
14980	26	9.30905e-08	0.00185473	3.09035e-08	0.000615721	1.23635e-06	0.0118497	4.06241e-07	0.00389358	-7.72801e-05	-1.21583	-2.59669e-05	-0.408532	1.76786e-06	0.0183146	5.76149e-07	0.00596876	1.16672e-06	0.0122904	3.79088e-07	0.00399337	2.15556e-07	0.00327402	7.1821e-08	0.00109087
14990	26	9.47827e-08	0.00185569	3.14652e-08	0.000616037	1.24282e-06	0.0118621	4.08366e-07	0.00389765	-7.72578e-05	-1.2166	-2.59594e-05	-0.408791	1.76095e-06	0.0183322	5.73898e-07	0.00597451	1.16517e-06	0.0123021	3.78585e-07	0.00399717	2.16413e-07	0.00327618	7.21064e-08	0.00109159
15000	26	9.10903e-08	0.0018566	3.02394e-08	0.000616341	1.23925e-06	0.0118745	4.07192e-07	0.00390172	-7.72478e-05	-1.21738	-2.5956e-05	-0.409051	1.77181e-06	0.0183499	5.77439e-07	0.00598027	1.17441e-06	0.0123138	3.81585e-07	0.00400097	2.21403e-07	0.00327839	7.37692e-08	0.00109232
15010	26	8.16783e-08	0.00185746	2.71149e-08	0.000616625	1.26028e-06	0.011887	4.14102e-07	0.00390584	-7.72305e-05	-1.21815	-2.59502e-05	-0.40931	1.78413e-06	0.0183676	5.81454e-07	0.00598607	1.16855e-06	0.0123255	3.79684e-07	0.00400478	2.28593e-07	0.00328064	7.61646e-08	0.00109307
15020	26	7.68505e-08	0.00185826	2.55122e-08	0.000616891	1.26743e-06	0.0118997	4.16452e-07	0.00390999	-7.7217e-05	-1.21892	-2.59457e-05	-0.40957	1.78529e-06	0.0183855	5.81833e-07	0.00599189	1.16669e-06	0.0123372	3.79078e-07	0.00400857	2.29584e-07	0.00328293	7.64948e-08	0.00109384
15030	26	6.96191e-08	0.00185897	2.31116e-08	0.000617126	1.25681e-06	0.0119123	4.12963e-07	0.00391413	-7.71828e-05	-1.21969	-2.59342e-05	-0.409829	1.78787e-06	0.0184034	5.82672e-07	0.0059977	1.15824e-06	0.0123488	3.76334e-07	0.00401234	2.36091e-07	0.00328528	7.86629e-08	0.00109462
15040	26	9.06766e-08	0.00185976	3.01021e-08	0.00061739	1.26325e-06	0.0119249	4.15078e-07	0.00391827	-7.71677e-05	-1.22046	-2.59291e-05	-0.410089	1.8075e-06	0.0184213	5.89069e-07	0.00600356	1.16105e-06	0.0123604	3.77246e-07	0.00401611	2.43696e-07	0.00328764	8.1197e-08	0.00109541
15050	26	9.46985e-08	0.00186067	3.14373e-08	0.000617691	1.25847e-06	0.0119375	4.13508e-07	0.00392241	-7.71469e-05	-1.22124	-2.59221e-05	-0.410348	1.80022e-06	0.0184393	5.86697e-07	0.00600943	1.15178e-06	0.012372	3.74233e-07	0.00401987	2.52222e-07	0.00329012	8.40376e-08	0.00109623
15060	26	1.08343e-07	0.00186172	3.59669e-08	0.00061804	1.26823e-06	0.0119501	4.16716e-07	0.00392657	-7.71218e-05	-1.22201	-2.59137e-05	-0.410607	1.8082e-06	0.0184574	5.89296e-07	0.00601531	1.14574e-06	0.0123834	3.72271e-07	0.0040236	2.47766e-07	0.00329261	8.25529e-08	0.00109706
15070	26	1.06089e-07	0.00186279	3.52185e-08	0.000618396	1.27112e-06	0.0119628	4.17664e-07	0.00393074	-7.71058e-05	-1.22278	-2.59083e-05	-0.410866	1.81064e-06	0.0184755	5.90091e-07	0.00602121	1.14435e-06	0.0123949	3.71818e-07	0.00402732	2.43247e-07	0.00329507	8.10472e-08	0.00109788
15080	26	1.16629e-07	0.0018639	3.87175e-08	0.000618763	1.28582e-06	0.0119756	4.22493e-07	0.00393494	-7.70756e-05	-1.22355	-2.58982e-05	-0.411125	1.83265e-06	0.0184937	5.97266e-07	0.00602715	1.1594e-06	0.0124064	3.7671e-07	0.00403106	2.52293e-07	0.00329756	8.40611e-08	0.00109871
15090	26	1.39064e-07	0.00186517	4.61655e-08	0.000619185	1.29091e-06	0.0119885	4.24168e-07	0.00393917	-7.70352e-05	-1.22432	-2.58846e-05	-0.411384	1.84028e-06	0.0185121	5.99753e-07	0.00603314	1.15263e-06	0.012418	3.7451e-07	0.00403482	2.58954e-07	0.00330011	8.62806e-08	0.00109956
15100	26	1.53623e-07	0.00186665	5.09987e-08	0.000619675	1.31101e-06	0.0120015	4.30773e-07	0.00394345	-7.70133e-05	-1.22509	-2.58773e-05	-0.411643	1.82596e-06	0.0185304	5.95085e-07	0.00603912	1.15397e-06	0.0124295	3.74946e-07	0.00403858	2.66825e-07	0.00330274	8.89032e-08	0.00110044
15110	26	1.65337e-07	0.00186825	5.48874e-08	0.000620206	1.32404e-06	0.0120147	4.35052e-07	0.00394778	-7.69832e-05	-1.22586	-2.58671e-05	-0.411902	1.80231e-06	0.0185486	5.87376e-07	0.00604503	1.14816e-06	0.012441	3.73059e-07	0.00404231	2.63467e-07	0.0033054	8.77844e-08	0.00110132
15120	26	1.50768e-07	0.00186982	5.00506e-08	0.000620729	1.31794e-06	0.0120279	4.33047e-07	0.00395213	-7.69672e-05	-1.22663	-2.58618e-05	-0.41216	1.8182e-06	0.0185667	5.92557e-07	0.00605092	1.15982e-06	0.0124525	3.76847e-07	0.00404606	2.62027e-07	0.00330803	8.73046e-08	0.0011022
15130	26	1.49759e-07	0.00187132	4.97159e-08	0.000621228	1.32621e-06	0.0120411	4.35766e-07	0.00395647	-7.69448e-05	-1.2274	-2.58542e-05	-0.412419	1.81616e-06	0.0185848	5.9189e-07	0.00605685	1.16327e-06	0.0124642	3.77966e-07	0.00404983	2.48968e-07	0.00331058	8.29533e-08	0.00110305
15140	26	1.34489e-07	0.00187275	4.46467e-08	0.000621701	1.34152e-06	0.0120545	4.40795e-07	0.00396085	-7.69166e-05	-1.22817	-2.58448e-05	-0.412677	1.81003e-06	0.018603	5.89893e-07	0.00606277	1.17643e-06	0.0124759	3.82243e-07	0.00405363	2.52746e-07	0.00331309	8.42123e-08	0.00110389
15150	26	1.20559e-07	0.00187401	4.00223e-08	0.00062212	1.34477e-06	0.0120679	4.41866e-07	0.00396527	-7.68975e-05	-1.22894	-2.58383e-05	-0.412936	1.81887e-06	0.0186211	5.92774e-07	0.00606868	1.17792e-06	0.0124876	3.82726e-07	0.00405745	2.55268e-07	0.00331562	8.50524e-08	0.00110473
15160	26	1.27168e-07	0.00187524	4.22163e-08	0.000622528	1.33817e-06	0.0120813	4.39696e-07	0.00396968	-7.68661e-05	-1.22971	-2.58278e-05	-0.413194	1.82395e-06	0.0186393	5.94431e-07	0.00607461	1.18859e-06	0.0124995	3.86193e-07	0.0040613	2.6463e-07	0.00331823	8.81716e-08	0.0011056
15170	26	1.34331e-07	0.00187655	4.45943e-08	0.000622961	1.33824e-06	0.0120947	4.3972e-07	0.00397407	-7.68364e-05	-1.23048	-2.58178e-05	-0.413452	1.83215e-06	0.0186576	5.97102e-07	0.00608057	1.18275e-06	0.0125113	3.84297e-07	0.00406515	2.70491e-07	0.0033209	9.01247e-08	0.00110649
15180	26	1.49055e-07	0.00187796	4.9482e-08	0.000623429	1.32716e-06	0.012108	4.36077e-07	0.00397846	-7.67973e-05	-1.23124	-2.58047e-05	-0.41371	1.82774e-06	0.0186759	5.95667e-07	0.00608654	1.18086e-06	0.0125231	3.83681e-07	0.00406899	2.76108e-07	0.00332363	9.19961e-08	0.0011074
15190	26	1.60109e-07	0.00187951	5.31518e-08	0.000623945	1.33155e-06	0.0121213	4.3752e-07	0.00398282	-7.67604e-05	-1.23201	-2.57923e-05	-0.413968	1.82047e-06	0.0186942	5.93296e-07	0.00609248	1.18057e-06	0.0125349	3.83587e-07	0.00407282	2.77456e-07	0.00332641	9.24451e-08	0.00110832
15200	26	1.62677e-07	0.00188115	5.40044e-08	0.000624489	1.34002e-06	0.0121347	4.40305e-07	0.00398721	-7.67239e-05	-1.23278	-2.578e-05	-0.414226	1.83299e-06	0.0187124	5.97376e-07	0.00609843	1.18609e-06	0.0125468	3.85381e-07	0.00407667	2.76968e-07	0.00332919	9.22826e-08	0.00110925
15210	26	1.48606e-07	0.00188269	4.93332e-08	0.000625002	1.33867e-06	0.0121481	4.39859e-07	0.00399161	-7.67098e-05	-1.23355	-2.57753e-05	-0.414484	1.84071e-06	0.0187308	5.99891e-07	0.00610442	1.19398e-06	0.0125587	3.87946e-07	0.00408053	2.68167e-07	0.00333188	8.93502e-08	0.00111015
15220	26	1.43529e-07	0.00188415	4.76475e-08	0.000625486	1.32686e-06	0.0121614	4.35979e-07	0.00399598	-7.66874e-05	-1.23431	-2.57677e-05	-0.414742	1.83547e-06	0.0187491	5.98184e-07	0.0061104	1.1917e-06	0.0125706	3.87204e-07	0.00408441	2.64808e-07	0.00333456	8.82312e-08	0.00111104
15230	26	1.32084e-07	0.00188553	4.38483e-08	0.000625943	1.33412e-06	0.0121747	4.38366e-07	0.00400036	-7.66576e-05	-1.23508	-2.57578e-05	-0.414999	1.85322e-06	0.0187676	6.03969e-07	0.00611641	1.18723e-06	0.0125825	3.85752e-07	0.00408827	2.4429e-07	0.00333708	8.13948e-08	0.00111188
15240	26	1.29546e-07	0.00188682	4.30056e-08	0.000626373	1.33345e-06	0.012188	4.38144e-07	0.00400474	-7.66387e-05	-1.23585	-2.57514e-05	-0.415257	1.85595e-06	0.0187862	6.04859e-07	0.00612246	1.19303e-06	0.0125944	3.87637e-07	0.00409214	2.59658e-07	0.00333959	8.65152e-08	0.00111271
15250	26	1.53188e-07	0.00188824	5.08541e-08	0.000626843	1.33099e-06	0.0122014	4.37335e-07	0.00400912	-7.66216e-05	-1.23661	-2.57456e-05	-0.415514	1.85763e-06	0.0188047	6.05406e-07	0.00612851	1.20225e-06	0.0126063	3.90634e-07	0.00409603	2.59678e-07	0.0033422	8.65218e-08	0.00111358
15260	26	1.68273e-07	0.00188985	5.58619e-08	0.000627378	1.31732e-06	0.0122146	4.32845e-07	0.00401347	-7.66002e-05	-1.23738	-2.57384e-05	-0.415772	1.85079e-06	0.0188233	6.03178e-07	0.00613455	1.19653e-06	0.0126184	3.88773e-07	0.00409993	2.57892e-07	0.00334478	8.59267e-08	0.00111444
15270	26	1.76725e-07	0.00189157	5.86678e-08	0.00062795	1.30714e-06	0.0122277	4.29499e-07	0.00401778	-7.65783e-05	-1.23814	-2.57311e-05	-0.416029	1.85882e-06	0.0188418	6.05795e-07	0.00614061	1.17786e-06	0.0126302	3.82708e-07	0.00410379	2.50607e-07	0.00334735	8.34995e-08	0.0011153
15280	26	1.68747e-07	0.00189335	5.60193e-08	0.000628538	1.31613e-06	0.0122408	4.32454e-07	0.00402209	-7.65623e-05	-1.23891	-2.57257e-05	-0.416286	1.85976e-06	0.0188604	6.06101e-07	0.00614666	1.17126e-06	0.012642	3.80562e-07	0.0041076	2.54222e-07	0.00334984	8.4704e-08	0.00111613
15290	26	1.60837e-07	0.00189498	5.33935e-08	0.000629079	1.31712e-06	0.012254	4.3278e-07	0.00402642	-7.65394e-05	-1.23968	-2.5718e-05	-0.416544	1.86342e-06	0.018879	6.07295e-07	0.00615273	1.17676e-06	0.0126537	3.82349e-07	0.00411141	2.53721e-07	0.00335239	8.4537e-08	0.00111698
15300	26	1.59922e-07	0.0018966	5.30896e-08	0.000629618	1.31604e-06	0.0122672	4.32424e-07	0.00403074	-7.65046e-05	-1.24044	-2.57063e-05	-0.416801	1.85824e-06	0.0188976	6.05605e-07	0.00615878	1.18358e-06	0.0126655	3.84565e-07	0.00411525	2.38944e-07	0.00335484	7.96136e-08	0.0011178
15310	26	1.53018e-07	0.00189816	5.07979e-08	0.000630138	1.31754e-06	0.0122803	4.32918e-07	0.00403507	-7.64921e-05	-1.24121	-2.57021e-05	-0.417058	1.86699e-06	0.0189162	6.08456e-07	0.00616485	1.18303e-06	0.0126773	3.84388e-07	0.00411909	2.31933e-07	0.0033572	7.72776e-08	0.00111858
15320	26	1.36928e-07	0.00189962	4.54563e-08	0.000630622	1.30933e-06	0.0122934	4.3022e-07	0.00403938	-7.64684e-05	-1.24197	-2.56942e-05	-0.417315	1.86995e-06	0.0189349	6.09422e-07	0.00617094	1.18353e-06	0.0126892	3.8455e-07	0.00412294	2.5044e-07	0.00335961	8.34437e-08	0.00111938
15330	26	1.3723e-07	0.00190097	4.55566e-08	0.000631068	1.31327e-06	0.0123066	4.31513e-07	0.00404369	-7.64492e-05	-1.24274	-2.56877e-05	-0.417572	1.85062e-06	0.0189535	6.03122e-07	0.006177	1.18343e-06	0.012701	3.84518e-07	0.00412678	2.51738e-07	0.00336212	8.38763e-08	0.00112022
15340	26	1.46754e-07	0.00190238	4.87181e-08	0.000631539	1.30256e-06	0.0123196	4.27997e-07	0.00404798	-7.64244e-05	-1.2435	-2.56794e-05	-0.417829	1.83164e-06	0.0189719	5.96937e-07	0.006183	1.18794e-06	0.0127129	3.85982e-07	0.00413064	2.6254e-07	0.00336468	8.74753e-08	0.00112107
15350	26	1.4506e-07	0.00190384	4.81558e-08	0.000632023	1.29884e-06	0.0123326	4.26773e-07	0.00405225	-7.63988e-05	-1.24426	-2.56708e-05	-0.418085	1.82629e-06	0.0189902	5.95192e-07	0.00618896	1.18502e-06	0.0127247	3.85034e-07	0.00413449	2.68515e-07	0.00336734	8.94664e-08	0.00112196
15360	26	1.39256e-07	0.00190526	4.6229e-08	0.000632494	1.30994e-06	0.0123457	4.3042e-07	0.00405654	-7.63873e-05	-1.24503	-2.56669e-05	-0.418342	1.82274e-06	0.0190085	5.94037e-07	0.00619491	1.17884e-06	0.0127365	3.83025e-07	0.00413833	2.52245e-07	0.00336995	8.40452e-08	0.00112283
15370	26	1.40637e-07	0.00190666	4.66876e-08	0.000632959	1.3181e-06	0.0123588	4.33102e-07	0.00406086	-7.63566e-05	-1.24579	-2.56566e-05	-0.418599	1.81887e-06	0.0190267	5.92775e-07	0.00620084	1.17955e-06	0.0127483	3.83257e-07	0.00414216	2.35406e-07	0.00337238	7.84348e-08	0.00112364
15380	26	1.41292e-07	0.00190808	4.69051e-08	0.000633429	1.31428e-06	0.012372	4.31847e-07	0.00406519	-7.63537e-05	-1.24655	-2.56556e-05	-0.418855	1.82042e-06	0.0190448	5.9328e-07	0.00620677	1.18905e-06	0.0127602	3.86343e-07	0.00414601	2.23589e-07	0.00337468	7.44975e-08	0.00112441
15390	26	1.33326e-07	0.00190946	4.42607e-08	0.000633886	1.32328e-06	0.0123852	4.34803e-07	0.00406952	-7.63322e-05	-1.24732	-2.56484e-05	-0.419112	1.81843e-06	0.0190631	5.92631e-07	0.0062127	1.17965e-06	0.012772	3.83289e-07	0.00414986	2.18083e-07	0.00337688	7.26628e-08	0.00112514
15400	26	1.20314e-07	0.00191072	3.99408e-08	0.000634307	1.32497e-06	0.0123984	4.35358e-07	0.00407388	-7.63087e-05	-1.24808	-2.56405e-05	-0.419368	1.78969e-06	0.0190811	5.83266e-07	0.00621859	1.17671e-06	0.0127838	3.82335e-07	0.00415369	2.3164e-07	0.0033791	7.71798e-08	0.00112588
15410	26	1.27347e-07	0.00191196	4.22756e-08	0.000634718	1.32718e-06	0.0124117	4.36085e-07	0.00407823	-7.62908e-05	-1.24884	-2.56345e-05	-0.419624	1.80116e-06	0.0190991	5.87004e-07	0.00622444	1.16885e-06	0.0127955	3.79779e-07	0.00415749	2.40068e-07	0.00338147	7.99881e-08	0.00112667
15420	26	1.20918e-07	0.00191321	4.01415e-08	0.000635132	1.31984e-06	0.0124249	4.33673e-07	0.00408258	-7.62669e-05	-1.24961	-2.56264e-05	-0.419881	1.80928e-06	0.0191171	5.89648e-07	0.00623032	1.17663e-06	0.0128072	3.82309e-07	0.0041613	2.37709e-07	0.00338386	7.92019e-08	0.00112746
15430	26	1.07381e-07	0.00191436	3.56475e-08	0.000635516	1.3133e-06	0.0124381	4.31523e-07	0.00408691	-7.62511e-05	-1.25037	-2.56212e-05	-0.420137	1.82249e-06	0.0191353	5.93953e-07	0.00623624	1.17522e-06	0.012819	3.81852e-07	0.00416513	2.29873e-07	0.00338621	7.65911e-08	0.00112825
15440	26	1.21096e-07	0.0019155	4.02005e-08	0.000635893	1.31054e-06	0.0124512	4.30616e-07	0.00409122	-7.62253e-05	-1.25113	-2.56125e-05	-0.420393	1.84328e-06	0.0191536	6.0073e-07	0.00624222	1.1756e-06	0.0128308	3.81974e-07	0.00416894	2.33321e-07	0.00338852	7.77399e-08	0.00112902
15450	26	1.24995e-07	0.00191675	4.14947e-08	0.000636307	1.30931e-06	0.0124643	4.30214e-07	0.00409553	-7.61964e-05	-1.25189	-2.56028e-05	-0.420649	1.84529e-06	0.0191721	6.01384e-07	0.00624823	1.17965e-06	0.0128425	3.83288e-07	0.00417277	2.204e-07	0.00339078	7.34349e-08	0.00112977
15460	26	1.26245e-07	0.00191799	4.191e-08	0.00063672	1.31006e-06	0.0124774	4.3046e-07	0.00409983	-7.61685e-05	-1.25266	-2.55934e-05	-0.420905	1.85415e-06	0.0191906	6.04273e-07	0.00625426	1.18767e-06	0.0128544	3.85894e-07	0.00417662	2.2935e-07	0.00339305	7.6417e-08	0.00113053
15470	26	1.16107e-07	0.00191921	3.85442e-08	0.000637124	1.30207e-06	0.0124905	4.27834e-07	0.00410412	-7.61566e-05	-1.25342	-2.55894e-05	-0.421161	1.8401e-06	0.0192091	5.99693e-07	0.00626029	1.18639e-06	0.0128662	3.8548e-07	0.00418047	2.06113e-07	0.00339521	6.86747e-08	0.00113125
15480	26	1.01016e-07	0.00192029	3.35346e-08	0.000637484	1.30198e-06	0.0125035	4.27803e-07	0.0041084	-7.61196e-05	-1.25418	-2.5577e-05	-0.421417	1.83189e-06	0.0192274	5.97019e-07	0.00626626	1.18931e-06	0.0128781	3.86429e-07	0.00418433	2.0378e-07	0.00339724	6.78972e-08	0.00113192
15490	26	9.85739e-08	0.00192128	3.27238e-08	0.000637813	1.31365e-06	0.0125166	4.3164e-07	0.00411269	-7.60926e-05	-1.25494	-2.55679e-05	-0.421673	1.82197e-06	0.0192457	5.93785e-07	0.00627222	1.19114e-06	0.01289	3.87023e-07	0.0041882	2.16202e-07	0.00339935	7.20363e-08	0.00113263
15500	26	9.74284e-08	0.00192227	3.23435e-08	0.000638141	1.30564e-06	0.0125297	4.29007e-07	0.004117	-7.60666e-05	-1.2557	-2.55592e-05	-0.421928	1.82521e-06	0.0192639	5.9484e-07	0.00627817	1.18687e-06	0.0129019	3.85636e-07	0.00419206	2.13109e-07	0.00340152	7.10056e-08	0.00113335
15510	26	1.02105e-07	0.00192327	3.38961e-08	0.000638471	1.30667e-06	0.0125428	4.29344e-07	0.0041213	-7.60473e-05	-1.25646	-2.55527e-05	-0.422184	1.81632e-06	0.0192821	5.91944e-07	0.0062841	1.17622e-06	0.0129137	3.82174e-07	0.00419589	2.18449e-07	0.00340364	7.27847e-08	0.00113406
15520	26	1.04802e-07	0.0019243	3.47913e-08	0.000638815	1.30463e-06	0.0125558	4.28675e-07	0.00412558	-7.60207e-05	-1.25722	-2.55437e-05	-0.422439	1.79608e-06	0.0193002	5.85347e-07	0.00628998	1.18476e-06	0.0129255	3.84951e-07	0.00419973	2.0703e-07	0.0034058	6.89803e-08	0.00113477
15530	26	1.06863e-07	0.00192536	3.54756e-08	0.000639167	1.3052e-06	0.0125688	4.28862e-07	0.00412987	-7.59991e-05	-1.25798	-2.55365e-05	-0.422695	1.78807e-06	0.0193181	5.82736e-07	0.00629582	1.19184e-06	0.0129374	3.87249e-07	0.0042036	2.03316e-07	0.00340784	6.77426e-08	0.00113545
15540	26	1.27464e-07	0.00192653	4.23146e-08	0.000639555	1.31588e-06	0.012582	4.32372e-07	0.00413418	-7.59966e-05	-1.25874	-2.55356e-05	-0.42295	1.7838e-06	0.019336	5.81345e-07	0.00630164	1.1849e-06	0.0129493	3.84995e-07	0.00420746	2.0428e-07	0.00340987	6.80639e-08	0.00113613
15550	26	1.22377e-07	0.00192779	4.06256e-08	0.000639973	1.32568e-06	0.0125952	4.35591e-07	0.00413852	-7.59893e-05	-1.2595	-2.55332e-05	-0.423206	1.788e-06	0.0193538	5.82713e-07	0.00630746	1.1958e-06	0.0129612	3.88536e-07	0.00421133	2.03567e-07	0.00341191	6.78263e-08	0.00113681
15560	26	1.09545e-07	0.00192895	3.63659e-08	0.000640359	1.32333e-06	0.0126084	4.3482e-07	0.00414288	-7.59735e-05	-1.26026	-2.55279e-05	-0.423461	1.77451e-06	0.0193716	5.78318e-07	0.00631327	1.1798e-06	0.0129731	3.83337e-07	0.00421519	2.14259e-07	0.00341398	7.13888e-08	0.0011375
15570	26	9.54148e-08	0.00192997	3.16751e-08	0.000640698	1.32062e-06	0.0126216	4.33931e-07	0.00414722	-7.59651e-05	-1.26102	-2.5525e-05	-0.423716	1.75911e-06	0.0193893	5.73297e-07	0.00631903	1.1773e-06	0.0129849	3.82526e-07	0.00421901	2.16347e-07	0.00341615	7.20843e-08	0.00113822
15580	26	1.04627e-07	0.00193096	3.47333e-08	0.000641027	1.32223e-06	0.0126349	4.34458e-07	0.00415156	-7.59438e-05	-1.26178	-2.55179e-05	-0.423971	1.75483e-06	0.0194069	5.71904e-07	0.00632475	1.16877e-06	0.0129966	3.79754e-07	0.00422283	2.14481e-07	0.00341831	7.14625e-08	0.00113894
15590	26	1.10026e-07	0.00193205	3.65256e-08	0.000641386	1.31294e-06	0.012648	4.31404e-07	0.00415589	-7.59089e-05	-1.26254	-2.55062e-05	-0.424226	1.76211e-06	0.0194245	5.74275e-07	0.00633048	1.15615e-06	0.0130082	3.75655e-07	0.00422661	2.14674e-07	0.00342044	7.1527e-08	0.00113965
15600	26	1.14515e-07	0.00193317	3.80159e-08	0.000641757	1.30003e-06	0.0126611	4.27162e-07	0.00416018	-7.59007e-05	-1.2633	-2.55034e-05	-0.424481	1.75559e-06	0.019442	5.72152e-07	0.00633622	1.13806e-06	0.0130197	3.69777e-07	0.00423033	1.98271e-07	0.00342253	6.60618e-08	0.00114035
15610	26	1.05765e-07	0.00193429	3.5111e-08	0.000642129	1.29987e-06	0.0126741	4.27113e-07	0.00416446	-7.58693e-05	-1.26406	-2.54929e-05	-0.424736	1.75453e-06	0.0194596	5.71806e-07	0.00634194	1.13329e-06	0.013031	3.68227e-07	0.00423402	2.11508e-07	0.00342455	7.0472e-08	0.00114102
15620	26	9.0409e-08	0.00193523	3.00133e-08	0.000642442	1.28541e-06	0.012687	4.22359e-07	0.0041687	-7.58577e-05	-1.26482	-2.5489e-05	-0.424991	1.74798e-06	0.0194772	5.69672e-07	0.00634766	1.13087e-06	0.0130424	3.6744e-07	0.0042377	2.05283e-07	0.00342662	6.8398e-08	0.00114171
15630	26	9.96035e-08	0.00193618	3.30656e-08	0.000642759	1.28631e-06	0.0126999	4.22654e-07	0.00417292	-7.58372e-05	-1.26558	-2.54821e-05	-0.425246	1.75033e-06	0.0194946	5.70437e-07	0.00635335	1.12524e-06	0.0130536	3.65612e-07	0.00424136	1.92592e-07	0.00342861	6.41695e-08	0.00114237
15640	26	9.61666e-08	0.00193716	3.19246e-08	0.000643084	1.28877e-06	0.0127128	4.23464e-07	0.00417715	-7.58346e-05	-1.26633	-2.54812e-05	-0.425501	1.75214e-06	0.0195121	5.71027e-07	0.00635905	1.12712e-06	0.0130649	3.66222e-07	0.00424502	1.90892e-07	0.00343052	6.3603e-08	0.00114301
15650	26	9.33585e-08	0.00193811	3.09924e-08	0.000643399	1.28859e-06	0.0127256	4.23404e-07	0.00418139	-7.58336e-05	-1.26709	-2.54809e-05	-0.425756	1.75298e-06	0.0195297	5.713e-07	0.00636477	1.13624e-06	0.0130762	3.69185e-07	0.0042487	1.97361e-07	0.00343246	6.57584e-08	0.00114366
15660	26	7.89045e-08	0.00193897	2.61941e-08	0.000643685	1.27954e-06	0.0127385	4.2043e-07	0.00418561	-7.5815e-05	-1.26785	-2.54746e-05	-0.426011	1.74349e-06	0.0195472	5.68209e-07	0.00637047	1.13634e-06	0.0130876	3.69216e-07	0.00425239	2.1358e-07	0.00343452	7.11623e-08	0.00114434
15670	26	6.19522e-08	0.00193968	2.05664e-08	0.000643919	1.2793e-06	0.0127513	4.20352e-07	0.00418981	-7.57804e-05	-1.26861	-2.5463e-05	-0.426265	1.73736e-06	0.0195645	5.66209e-07	0.00637614	1.13334e-06	0.0130989	3.68242e-07	0.00425608	2.0929e-07	0.00343663	6.97332e-08	0.00114505
15680	26	6.36961e-08	0.00194029	2.11453e-08	0.000644124	1.2689e-06	0.012764	4.16935e-07	0.004194	-7.57586e-05	-1.26937	-2.54557e-05	-0.42652	1.74415e-06	0.0195819	5.68424e-07	0.00638181	1.12107e-06	0.0131102	3.64254e-07	0.00425974	2.02343e-07	0.0034387	6.74183e-08	0.00114574
15690	26	7.39356e-08	0.00194099	2.45446e-08	0.000644354	1.27279e-06	0.0127767	4.18212e-07	0.00419818	-7.57568e-05	-1.27012	-2.5455e-05	-0.426774	1.74637e-06	0.0195994	5.69146e-07	0.0063875	1.1159e-06	0.0131214	3.62574e-07	0.00426337	2.00227e-07	0.00344071	6.67134e-08	0.00114641
15700	26	8.79328e-08	0.00194181	2.91913e-08	0.000644625	1.27168e-06	0.0127894	4.1785e-07	0.00420235	-7.5724e-05	-1.27088	-2.54441e-05	-0.427029	1.7546e-06	0.0196169	5.71828e-07	0.00639321	1.11778e-06	0.0131326	3.63187e-07	0.004267	1.97153e-07	0.00344269	6.56891e-08	0.00114707
15710	26	8.54797e-08	0.00194268	2.83769e-08	0.000644916	1.28051e-06	0.0128022	4.20751e-07	0.00420654	-7.56885e-05	-1.27164	-2.54321e-05	-0.427283	1.75911e-06	0.0196345	5.73298e-07	0.00639893	1.10937e-06	0.0131437	3.60455e-07	0.00427062	1.9227e-07	0.00344465	6.40622e-08	0.00114772
15720	26	7.90873e-08	0.0019435	2.62548e-08	0.00064519	1.27209e-06	0.012815	4.17982e-07	0.00421074	-7.56716e-05	-1.27239	-2.54264e-05	-0.427538	1.75597e-06	0.0196521	5.72275e-07	0.00640466	1.11474e-06	0.0131548	3.62199e-07	0.00427423	1.94068e-07	0.00344657	6.46612e-08	0.00114836
15730	26	6.14686e-08	0.00194421	2.04059e-08	0.000645424	1.26586e-06	0.0128276	4.15936e-07	0.00421491	-7.56578e-05	-1.27315	-2.54218e-05	-0.427792	1.76937e-06	0.0196697	5.76644e-07	0.0064104	1.11858e-06	0.013166	3.63447e-07	0.00427786	2.00193e-07	0.00344854	6.6702e-08	0.00114902
15740	26	5.61267e-08	0.00194478	1.86325e-08	0.000645614	1.26113e-06	0.0128403	4.14382e-07	0.00421906	-7.56375e-05	-1.27391	-2.5415e-05	-0.428046	1.7614e-06	0.0196873	5.74047e-07	0.00641616	1.10989e-06	0.0131771	3.60622e-07	0.00428148	1.96096e-07	0.00345052	6.53371e-08	0.00114968
15750	26	6.11893e-08	0.00194539	2.03132e-08	0.000645815	1.26032e-06	0.0128529	4.14114e-07	0.0042232	-7.56265e-05	-1.27466	-2.54113e-05	-0.4283	1.74985e-06	0.0197049	5.70281e-07	0.00642188	1.11966e-06	0.0131883	3.63798e-07	0.0042851	1.82186e-07	0.00345242	6.07022e-08	0.00115031
15760	26	6.21281e-08	0.00194602	2.06248e-08	0.000646024	1.2634e-06	0.0128655	4.15128e-07	0.00422735	-7.56035e-05	-1.27542	-2.54035e-05	-0.428554	1.7389e-06	0.0197223	5.66714e-07	0.00642756	1.11977e-06	0.0131995	3.63833e-07	0.00428874	1.83137e-07	0.00345424	6.10191e-08	0.00115091
15770	26	5.74545e-08	0.00194662	1.90733e-08	0.000646223	1.26087e-06	0.0128781	4.14298e-07	0.0042315	-7.55955e-05	-1.27618	-2.54008e-05	-0.428808	1.73234e-06	0.0197397	5.64574e-07	0.00643321	1.10718e-06	0.0132106	3.59744e-07	0.00429236	1.71449e-07	0.00345601	5.71251e-08	0.00115151
15780	26	4.41112e-08	0.00194713	1.46437e-08	0.000646392	1.25391e-06	0.0128907	4.1201e-07	0.00423562	-7.55837e-05	-1.27693	-2.53969e-05	-0.429062	1.74282e-06	0.0197571	5.67991e-07	0.00643888	1.10417e-06	0.0132216	3.58766e-07	0.00429595	1.72674e-07	0.00345772	5.75332e-08	0.00115208
15790	26	4.69557e-08	0.00194757	1.5588e-08	0.00064654	1.24888e-06	0.0129032	4.10356e-07	0.00423974	-7.5566e-05	-1.27769	-2.5391e-05	-0.429316	1.73713e-06	0.0197745	5.66135e-07	0.00644455	1.09346e-06	0.0132326	3.55284e-07	0.00429952	1.77665e-07	0.00345948	5.91961e-08	0.00115266
15800	26	3.64514e-08	0.00194799	1.21009e-08	0.000646678	1.24268e-06	0.0129157	4.0832e-07	0.00424383	-7.55338e-05	-1.27844	-2.53801e-05	-0.42957	1.72938e-06	0.0197918	5.6361e-07	0.0064502	1.09717e-06	0.0132436	3.56489e-07	0.00430308	1.75984e-07	0.00346126	5.8636e-08	0.00115325
15810	26	3.03143e-08	0.00194832	1.00635e-08	0.000646788	1.24361e-06	0.0129281	4.08624e-07	0.00424791	-7.55034e-05	-1.2792	-2.53699e-05	-0.429824	1.72154e-06	0.0198091	5.61056e-07	0.00645583	1.08477e-06	0.0132545	3.52461e-07	0.00430663	1.66494e-07	0.00346297	5.5474e-08	0.00115382
15820	26	3.03126e-08	0.00194863	1.00629e-08	0.00064689	1.23586e-06	0.0129405	4.06079e-07	0.00425199	-7.54836e-05	-1.27995	-2.53633e-05	-0.430077	1.70971e-06	0.0198262	5.57199e-07	0.00646141	1.08288e-06	0.0132653	3.51848e-07	0.00431014	1.53966e-07	0.00346457	5.12999e-08	0.00115436
15830	26	3.61739e-08	0.00194895	1.20087e-08	0.000646997	1.23458e-06	0.0129528	4.05658e-07	0.00425604	-7.54785e-05	-1.28071	-2.53615e-05	-0.430331	1.73043e-06	0.0198434	5.63953e-07	0.00646702	1.09346e-06	0.0132762	3.55286e-07	0.00431368	1.45922e-07	0.00346607	4.86196e-08	0.00115486
15840	26	3.56694e-08	0.00194932	1.18412e-08	0.00064712	1.23645e-06	0.0129652	4.06272e-07	0.0042601	-7.54579e-05	-1.28146	-2.53546e-05	-0.430585	1.73337e-06	0.0198607	5.64911e-07	0.00647266	1.1015e-06	0.0132872	3.57898e-07	0.00431725	1.3857e-07	0.00346749	4.61698e-08	0.00115533
15850	26	3.19432e-08	0.00194966	1.06042e-08	0.000647232	1.23152e-06	0.0129775	4.04651e-07	0.00426416	-7.5439e-05	-1.28222	-2.53483e-05	-0.430838	1.71745e-06	0.0198779	5.59722e-07	0.00647828	1.10477e-06	0.0132982	3.5896e-07	0.00432084	1.28161e-07	0.00346884	4.27018e-08	0.00115578
15860	26	1.93457e-08	0.00194992	6.42223e-09	0.00064732	1.22636e-06	0.0129898	4.02959e-07	0.0042682	-7.5422e-05	-1.28297	-2.53426e-05	-0.431092	1.71273e-06	0.0198951	5.58182e-07	0.00648387	1.10473e-06	0.0133093	3.58948e-07	0.00432442	1.28213e-07	0.0034701	4.27193e-08	0.0011562
15870	26	6.29279e-09	0.00195003	2.08903e-09	0.000647357	1.21368e-06	0.013002	3.9879e-07	0.0042722	-7.54098e-05	-1.28373	-2.53385e-05	-0.431345	1.71063e-06	0.0199122	5.57498e-07	0.00648944	1.1134e-06	0.0133204	3.61764e-07	0.00432803	1.4387e-07	0.00347148	4.79357e-08	0.00115666
15880	26	1.21302e-08	0.00195012	4.0269e-09	0.000647384	1.20914e-06	0.0130141	3.973e-07	0.00427618	-7.53987e-05	-1.28448	-2.53347e-05	-0.431598	1.70757e-06	0.0199293	5.56502e-07	0.00649502	1.10696e-06	0.0133315	3.59671e-07	0.00433164	1.47046e-07	0.00347293	4.8994e-08	0.00115714
15890	26	2.59794e-08	0.00195031	8.62445e-09	0.000647449	1.20594e-06	0.0130262	3.96249e-07	0.00428016	-7.53802e-05	-1.28523	-2.53285e-05	-0.431852	1.70819e-06	0.0199464	5.56703e-07	0.00650058	1.10196e-06	0.0133425	3.58045e-07	0.00433523	1.39846e-07	0.00347436	4.65952e-08	0.00115762
15900	26	2.63911e-08	0.00195058	8.7611e-09	0.000647538	1.21986e-06	0.0130384	4.0082e-07	0.00428414	-7.53623e-05	-1.28599	-2.53225e-05	-0.432105	1.71195e-06	0.0199635	5.57929e-07	0.00650615	1.11185e-06	0.0133536	3.61262e-07	0.00433882	1.38256e-07	0.00347574	4.60654e-08	0.00115808
15910	26	2.01325e-08	0.00195081	6.68345e-09	0.000647614	1.22919e-06	0.0130506	4.03888e-07	0.00428817	-7.53481e-05	-1.28674	-2.53177e-05	-0.432358	1.7144e-06	0.0199806	5.58729e-07	0.00651174	1.1225e-06	0.0133648	3.6472e-07	0.00434245	1.36252e-07	0.00347714	4.53977e-08	0.00115854
15920	26	2.27956e-08	0.00195101	7.5675e-09	0.000647682	1.24183e-06	0.013063	4.08041e-07	0.00429223	-7.53279e-05	-1.28749	-2.53109e-05	-0.432611	1.71653e-06	0.0199978	5.59422e-07	0.00651732	1.1114e-06	0.0133759	3.61113e-07	0.00434608	1.25797e-07	0.0034784	4.19143e-08	0.00115897
15930	26	2.35149e-08	0.00195124	7.80631e-09	0.000647759	1.23565e-06	0.0130754	4.06009e-07	0.00429631	-7.53012e-05	-1.28825	-2.5302e-05	-0.432864	1.71908e-06	0.0200149	5.60254e-07	0.00652293	1.11158e-06	0.013387	3.61173e-07	0.00434969	1.35012e-07	0.00347972	4.49844e-08	0.0011594
15940	26	1.17604e-08	0.00195144	3.90414e-09	0.000647822	1.22393e-06	0.0130877	4.0216e-07	0.00430035	-7.52721e-05	-1.289	-2.52922e-05	-0.433117	1.71891e-06	0.0200321	5.60197e-07	0.00652853	1.09963e-06	0.0133981	3.57289e-07	0.00435329	1.36561e-07	0.00348108	4.55005e-08	0.00115986
15950	26	1.16455e-08	0.00195155	3.86598e-09	0.00064786	1.22368e-06	0.0130999	4.02077e-07	0.00430437	-7.52557e-05	-1.28975	-2.52867e-05	-0.43337	1.71292e-06	0.0200493	5.58246e-07	0.00653411	1.09972e-06	0.0134091	3.57319e-07	0.00435686	1.35625e-07	0.00348244	4.51888e-08	0.00116031
15960	26	1.78217e-08	0.00195171	5.91631e-09	0.000647913	1.2247e-06	0.0131121	4.02412e-07	0.00430839	-7.52479e-05	-1.29051	-2.52841e-05	-0.433623	1.70202e-06	0.0200663	5.54692e-07	0.00653967	1.09795e-06	0.0134201	3.56745e-07	0.00436042	1.35368e-07	0.00348381	4.5103e-08	0.00116077
15970	26	1.18347e-08	0.00195185	3.9288e-09	0.000647962	1.22219e-06	0.0131244	4.01588e-07	0.00431241	-7.52278e-05	-1.29126	-2.52773e-05	-0.433876	1.69987e-06	0.0200833	5.53992e-07	0.00654522	1.10331e-06	0.0134311	3.58484e-07	0.004364	1.35128e-07	0.00348513	4.50231e-08	0.00116121
15980	26	6.86208e-09	0.00195194	2.27802e-09	0.000647989	1.22815e-06	0.0131366	4.03546e-07	0.00431643	-7.52125e-05	-1.29201	-2.52722e-05	-0.434129	1.69321e-06	0.0201003	5.51823e-07	0.00655075	1.10083e-06	0.0134421	3.5768e-07	0.00436758	1.44051e-07	0.00348653	4.79963e-08	0.00116167
15990	26	1.78786e-08	0.00195207	5.93519e-09	0.000648032	1.22878e-06	0.0131489	4.03752e-07	0.00432047	-7.51841e-05	-1.29276	-2.52626e-05	-0.434381	1.68933e-06	0.0201172	5.50558e-07	0.00655625	1.08881e-06	0.0134531	3.53772e-07	0.00437114	1.50153e-07	0.00348801	5.00293e-08	0.00116217
16000	26	1.30155e-08	0.0019522	4.32079e-09	0.000648075	1.21511e-06	0.0131611	3.9926e-07	0.00432449	-7.51669e-05	-1.29351	-2.52568e-05	-0.434634	1.68687e-06	0.0201341	5.49755e-07	0.00656176	1.07815e-06	0.0134639	3.50311e-07	0.00437465	1.51616e-07	0.0034895	5.05166e-08	0.00116266
16010	26	-3.6295e-09	0.00195225	-1.20489e-09	0.000648092	1.20846e-06	0.0131733	3.97075e-07	0.00432847	-7.51503e-05	-1.29427	-2.52513e-05	-0.434886	1.6774e-06	0.0201509	5.46669e-07	0.00656724	1.07349e-06	0.0134746	3.48797e-07	0.00437815	1.58461e-07	0.00349106	5.27973e-08	0.00116318
16020	26	2.72793e-09	0.00195224	9.05596e-10	0.000648091	1.20485e-06	0.0131853	3.9589e-07	0.00433244	-7.51222e-05	-1.29502	-2.52418e-05	-0.435139	1.66773e-06	0.0201676	5.43518e-07	0.00657269	1.06984e-06	0.0134853	3.47609e-07	0.00438163	1.49478e-07	0.00349259	4.98043e-08	0.00116369
16030	26	1.25699e-08	0.00195232	4.17287e-09	0.000648116	1.19801e-06	0.0131973	3.93642e-07	0.00433638	-7.50946e-05	-1.29577	-2.52326e-05	-0.435391	1.66378e-06	0.0201843	5.42229e-07	0.00657812	1.07211e-06	0.0134961	3.48349e-07	0.00438512	1.37153e-07	0.00349402	4.56978e-08	0.00116417
16040	26	9.70223e-09	0.00195243	3.22087e-09	0.000648152	1.1999e-06	0.0132093	3.94264e-07	0.00434032	-7.50822e-05	-1.29652	-2.52284e-05	-0.435644	1.65811e-06	0.0202009	5.40381e-07	0.00658353	1.07753e-06	0.0135068	3.50108e-07	0.00438861	1.31359e-07	0.00349536	4.37672e-08	0.00116462
16050	26	8.72909e-09	0.00195253	2.89782e-09	0.000648186	1.19587e-06	0.0132213	3.9294e-07	0.00434426	-7.50624e-05	-1.29727	-2.52217e-05	-0.435896	1.65297e-06	0.0202175	5.38708e-07	0.00658893	1.07638e-06	0.0135176	3.49734e-07	0.0043921	1.17856e-07	0.00349659	3.92685e-08	0.00116503
16060	26	-6.92188e-09	0.00195255	-2.29787e-09	0.000648191	1.18754e-06	0.0132332	3.902e-07	0.00434817	-7.50552e-05	-1.29802	-2.52193e-05	-0.436148	1.64744e-06	0.020234	5.36905e-07	0.0065943	1.08032e-06	0.0135284	3.51015e-07	0.00439561	1.10119e-07	0.00349773	3.66905e-08	0.0011654
16070	26	-1.07872e-08	0.00195244	-3.58104e-09	0.000648157	1.19303e-06	0.0132451	3.92006e-07	0.00435208	-7.50406e-05	-1.29877	-2.52144e-05	-0.4364	1.64607e-06	0.0202504	5.36459e-07	0.00659967	1.07687e-06	0.0135391	3.49894e-07	0.00439911	1.22873e-07	0.00349889	4.09399e-08	0.00116579
16080	26	-2.56907e-08	0.00195226	-8.52862e-09	0.000648098	1.18284e-06	0.013257	3.88656e-07	0.00435598	-7.50179e-05	-1.29952	-2.52068e-05	-0.436652	1.64909e-06	0.0202669	5.37444e-07	0.00660504	1.06839e-06	0.0135499	3.4714e-07	0.0044026	1.23664e-07	0.00350013	4.12036e-08	0.0011662
16090	26	-3.61435e-08	0.00195194	-1.19986e-08	0.000647991	1.17508e-06	0.0132688	3.86106e-07	0.00435985	-7.49967e-05	-1.30027	-2.51997e-05	-0.436904	1.64859e-06	0.0202834	5.3728e-07	0.00661042	1.04567e-06	0.0135605	3.39758e-07	0.00440603	1.10012e-07	0.00350131	3.66549e-08	0.0011666
16100	26	-2.67305e-08	0.00195161	-8.87377e-09	0.00064788	1.18013e-06	0.0132806	3.87768e-07	0.00436373	-7.49798e-05	-1.30102	-2.5194e-05	-0.437156	1.65371e-06	0.0202999	5.38949e-07	0.0066158	1.05413e-06	0.0135709	3.42507e-07	0.00440944	1.13009e-07	0.00350241	3.76532e-08	0.00116697
16110	26	-1.38135e-08	0.00195141	-4.58571e-09	0.000647815	1.17924e-06	0.0132924	3.87474e-07	0.0043676	-7.49608e-05	-1.30177	-2.51876e-05	-0.437408	1.65901e-06	0.0203165	5.40677e-07	0.0066212	1.05901e-06	0.0135815	3.44092e-07	0.00441288	1.11395e-07	0.00350353	3.71157e-08	0.00116734
16120	26	-6.24159e-09	0.00195131	-2.07203e-09	0.000647782	1.17811e-06	0.0133042	3.87103e-07	0.00437148	-7.49374e-05	-1.30252	-2.51797e-05	-0.43766	1.66074e-06	0.0203331	5.41241e-07	0.00662661	1.05653e-06	0.0135921	3.43285e-07	0.00441632	1.19479e-07	0.00350469	3.9809e-08	0.00116772
16130	26	-1.09281e-08	0.00195123	-3.62783e-09	0.000647755	1.18529e-06	0.013316	3.89463e-07	0.00437536	-7.49175e-05	-1.30327	-2.51731e-05	-0.437912	1.65967e-06	0.0203497	5.40891e-07	0.00663202	1.05793e-06	0.0136027	3.43742e-07	0.00441975	1.15042e-07	0.00350586	3.83308e-08	0.00116811
16140	26	-1.44196e-08	0.0019511	-4.78691e-09	0.000647711	1.18363e-06	0.0133278	3.88916e-07	0.00437925	-7.48955e-05	-1.30402	-2.51657e-05	-0.438164	1.65743e-06	0.0203663	5.4016e-07	0.00663742	1.06893e-06	0.0136133	3.47313e-07	0.0044232	1.162e-07	0.003507	3.87165e-08	0.00116849
16150	26	-2.33052e-08	0.00195093	-7.73669e-09	0.000647655	1.19338e-06	0.0133397	3.92121e-07	0.00438316	-7.48898e-05	-1.30477	-2.51637e-05	-0.438415	1.66667e-06	0.0203829	5.43171e-07	0.00664284	1.06953e-06	0.013624	3.47511e-07	0.00442668	1.14178e-07	0.00350816	3.80428e-08	0.00116888
16160	26	-2.27082e-08	0.00195071	-7.5385e-09	0.000647582	1.19576e-06	0.0133516	3.92902e-07	0.00438707	-7.48796e-05	-1.30552	-2.51603e-05	-0.438667	1.6649e-06	0.0203995	5.42596e-07	0.00664826	1.06422e-06	0.0136347	3.45783e-07	0.00443015	1.24476e-07	0.00350937	4.14741e-08	0.00116928
16170	26	-1.18511e-08	0.00195052	-3.93424e-09	0.000647519	1.20027e-06	0.0133636	3.94386e-07	0.00439101	-7.48688e-05	-1.30626	-2.51567e-05	-0.438918	1.66525e-06	0.0204162	5.42709e-07	0.00665369	1.06681e-06	0.0136453	3.46625e-07	0.00443361	1.14408e-07	0.00351057	3.81195e-08	0.00116968
16180	26	7.70266e-09	0.0019505	2.55707e-09	0.000647512	1.20531e-06	0.0133756	3.96039e-07	0.00439496	-7.48539e-05	-1.30701	-2.51517e-05	-0.43917	1.68614e-06	0.0204329	5.49518e-07	0.00665914	1.06468e-06	0.013656	3.45935e-07	0.00443707	1.16259e-07	0.00351171	3.87362e-08	0.00117006
16190	26	1.10044e-08	0.00195059	3.65314e-09	0.000647542	1.22102e-06	0.0133878	4.01203e-07	0.00439896	-7.48349e-05	-1.30776	-2.51453e-05	-0.439421	1.67982e-06	0.0204498	5.47457e-07	0.00666463	1.06217e-06	0.0136666	3.45119e-07	0.00444053	1.16379e-07	0.00351287	3.87762e-08	0.00117045
16200	26	9.00912e-09	0.00195067	2.99078e-09	0.000647568	1.20262e-06	0.0133999	3.95157e-07	0.00440295	-7.4804e-05	-1.30851	-2.51349e-05	-0.439673	1.67525e-06	0.0204665	5.4597e-07	0.0066701	1.06412e-06	0.0136772	3.4575e-07	0.00444397	1.12248e-07	0.00351404	3.73997e-08	0.00117084
16210	26	1.80739e-08	0.00195081	6.00002e-09	0.000647616	1.19002e-06	0.0134119	3.91016e-07	0.00440687	-7.47799e-05	-1.30926	-2.51268e-05	-0.439924	1.67592e-06	0.0204833	5.46188e-07	0.00667556	1.06678e-06	0.0136879	3.46616e-07	0.00444744	1.06395e-07	0.00351511	3.54495e-08	0.0011712
16220	26	2.83905e-08	0.00195103	9.42486e-09	0.000647689	1.19571e-06	0.0134238	3.92888e-07	0.00441079	-7.47457e-05	-1.31001	-2.51153e-05	-0.440175	1.68875e-06	0.0205001	5.50367e-07	0.00668104	1.06747e-06	0.0136985	3.46841e-07	0.0044509	1.16802e-07	0.00351624	3.89171e-08	0.00117157
16230	26	3.17902e-08	0.00195134	1.05535e-08	0.00064779	1.20936e-06	0.0134358	3.9737e-07	0.00441474	-7.47081e-05	-1.31075	-2.51027e-05	-0.440426	1.66892e-06	0.0205169	5.43904e-07	0.00668651	1.06417e-06	0.0137092	3.45769e-07	0.00445437	1.22118e-07	0.00351742	4.06885e-08	0.00117197
16240	26	3.44133e-08	0.00195166	1.14242e-08	0.000647898	1.21819e-06	0.013448	4.00273e-07	0.00441873	-7.46921e-05	-1.3115	-2.50973e-05	-0.440677	1.65013e-06	0.0205335	5.37781e-07	0.00669192	1.05599e-06	0.0137198	3.43111e-07	0.00445781	1.26648e-07	0.00351867	4.21977e-08	0.00117238
16250	26	4.20395e-08	0.00195205	1.39559e-08	0.000648027	1.2162e-06	0.0134601	3.99619e-07	0.00442273	-7.46836e-05	-1.31225	-2.50945e-05	-0.440928	1.65659e-06	0.02055	5.39889e-07	0.0066973	1.04724e-06	0.0137303	3.40266e-07	0.00446123	1.3605e-07	0.00351998	4.53303e-08	0.00117282
16260	26	4.18395e-08	0.00195248	1.38896e-08	0.000648171	1.21602e-06	0.0134723	3.99558e-07	0.00442673	-7.46574e-05	-1.31299	-2.50857e-05	-0.441179	1.6662e-06	0.0205666	5.43019e-07	0.00670272	1.04654e-06	0.0137408	3.4004e-07	0.00446462	1.47357e-07	0.00352139	4.90979e-08	0.00117329
16270	26	4.25848e-08	0.00195291	1.4137e-08	0.000648311	1.21825e-06	0.0134845	4.00291e-07	0.00443073	-7.46321e-05	-1.31374	-2.50771e-05	-0.44143	1.6714e-06	0.0205833	5.44714e-07	0.00670816	1.06301e-06	0.0137513	3.4539e-07	0.00446804	1.55556e-07	0.00352292	5.18295e-08	0.0011738
16280	26	4.92533e-08	0.00195335	1.63507e-08	0.000648459	1.23043e-06	0.0134967	4.04294e-07	0.00443475	-7.45942e-05	-1.31449	-2.50644e-05	-0.441681	1.66147e-06	0.0206	5.41479e-07	0.00671359	1.07514e-06	0.013762	3.49332e-07	0.00447152	1.57872e-07	0.00352446	5.26012e-08	0.00117431
16290	26	6.3308e-08	0.00195392	2.10165e-08	0.000648646	1.2275e-06	0.013509	4.03332e-07	0.00443879	-7.45657e-05	-1.31523	-2.50548e-05	-0.441931	1.6742e-06	0.0206167	5.45627e-07	0.00671903	1.07148e-06	0.0137728	3.48143e-07	0.00447502	1.53483e-07	0.00352602	5.1139e-08	0.00117483
16300	26	6.19556e-08	0.00195456	2.05676e-08	0.000648861	1.2329e-06	0.0135213	4.05106e-07	0.00444283	-7.45504e-05	-1.31598	-2.50497e-05	-0.442182	1.68023e-06	0.0206334	5.47593e-07	0.0067245	1.07976e-06	0.0137835	3.50833e-07	0.00447851	1.47976e-07	0.00352753	4.9304e-08	0.00117533
16310	26	6.24677e-08	0.00195516	2.07376e-08	0.000649059	1.23549e-06	0.0135336	4.05956e-07	0.00444688	-7.45318e-05	-1.31672	-2.50434e-05	-0.442432	1.67516e-06	0.0206502	5.4594e-07	0.00672996	1.07219e-06	0.0137943	3.48374e-07	0.00448201	1.41414e-07	0.00352897	4.71177e-08	0.00117581
16320	26	6.75952e-08	0.00195579	2.24397e-08	0.000649268	1.22788e-06	0.013546	4.03457e-07	0.00445094	-7.45173e-05	-1.31747	-2.50386e-05	-0.442683	1.68685e-06	0.020667	5.49749e-07	0.00673544	1.07402e-06	0.013805	3.48967e-07	0.00448549	1.39575e-07	0.00353038	4.65048e-08	0.00117628
16330	26	7.44003e-08	0.00195651	2.46988e-08	0.000649506	1.23177e-06	0.0135583	4.04734e-07	0.00445498	-7.45051e-05	-1.31821	-2.50345e-05	-0.442933	1.69066e-06	0.0206839	5.5099e-07	0.00674094	1.07901e-06	0.0138158	3.5059e-07	0.004489	1.45197e-07	0.00353181	4.83781e-08	0.00117676
16340	26	7.52917e-08	0.00195724	2.49948e-08	0.00064975	1.23559e-06	0.0135706	4.05991e-07	0.00445904	-7.44868e-05	-1.31896	-2.50283e-05	-0.443183	1.70375e-06	0.0207009	5.55256e-07	0.00674648	1.06618e-06	0.0138265	3.46421e-07	0.00449248	1.58506e-07	0.00353331	5.28125e-08	0.00117726
16350	26	8.43773e-08	0.00195804	2.80109e-08	0.000650016	1.2309e-06	0.013583	4.04447e-07	0.00446309	-7.44672e-05	-1.3197	-2.50217e-05	-0.443434	1.69636e-06	0.0207179	5.52847e-07	0.00675202	1.06443e-06	0.0138372	3.45852e-07	0.00449594	1.7391e-07	0.00353499	5.79448e-08	0.00117782
16360	26	8.86062e-08	0.0019589	2.94148e-08	0.000650301	1.23006e-06	0.0135953	4.04172e-07	0.00446713	-7.44506e-05	-1.32045	-2.50162e-05	-0.443684	1.68744e-06	0.0207348	5.49943e-07	0.00675753	1.06055e-06	0.0138478	3.44592e-07	0.0044994	1.72035e-07	0.00353673	5.732e-08	0.0011784
16370	26	8.47798e-08	0.00195977	2.81445e-08	0.000650588	1.22298e-06	0.0136075	4.01847e-07	0.00447116	-7.44212e-05	-1.32119	-2.50063e-05	-0.443934	1.68847e-06	0.0207517	5.50276e-07	0.00676304	1.07664e-06	0.0138585	3.4982e-07	0.00450286	1.78468e-07	0.00353847	5.94634e-08	0.00117898
16380	26	8.59307e-08	0.00196062	2.85266e-08	0.000650871	1.22727e-06	0.0136198	4.03258e-07	0.00447519	-7.43901e-05	-1.32194	-2.49958e-05	-0.444184	1.68814e-06	0.0207686	5.50169e-07	0.00676854	1.0921e-06	0.0138693	3.54843e-07	0.00450639	1.85993e-07	0.00354029	6.19707e-08	0.00117959
16390	26	8.49209e-08	0.00196147	2.81914e-08	0.000651155	1.23388e-06	0.0136321	4.05429e-07	0.00447923	-7.43674e-05	-1.32268	-2.49882e-05	-0.444434	1.69873e-06	0.0207855	5.53622e-07	0.00677406	1.10755e-06	0.0138803	3.59864e-07	0.00450997	1.81813e-07	0.00354213	6.0578e-08	0.0011802
16400	26	7.53117e-08	0.00196229	2.50014e-08	0.000651425	1.23612e-06	0.0136445	4.06163e-07	0.00448329	-7.43385e-05	-1.32342	-2.49785e-05	-0.444684	1.70404e-06	0.0208025	5.55352e-07	0.0067796	1.0976e-06	0.0138914	3.56628e-07	0.00451355	1.77326e-07	0.00354392	5.90829e-08	0.0011808
16410	26	6.91525e-08	0.00196299	2.29567e-08	0.000651659	1.22467e-06	0.0136568	4.02403e-07	0.00448734	-7.43103e-05	-1.32417	-2.4969e-05	-0.444934	1.69821e-06	0.0208195	5.5345e-07	0.00678515	1.09391e-06	0.0139023	3.5543e-07	0.0045171	1.88303e-07	0.00354576	6.27406e-08	0.00118141
16420	26	6.36376e-08	0.00196367	2.11259e-08	0.000651884	1.21608e-06	0.013669	3.9958e-07	0.00449135	-7.42859e-05	-1.32491	-2.49608e-05	-0.445183	1.69239e-06	0.0208365	5.51554e-07	0.00679067	1.10632e-06	0.0139133	3.59462e-07	0.00452068	1.89333e-07	0.00354764	6.30836e-08	0.00118204
16430	26	7.59158e-08	0.00196438	2.52019e-08	0.000652121	1.21509e-06	0.0136811	3.99253e-07	0.00449534	-7.42657e-05	-1.32565	-2.4954e-05	-0.445433	1.70923e-06	0.0208535	5.57043e-07	0.00679621	1.11278e-06	0.0139244	3.61562e-07	0.00452428	1.96169e-07	0.00354959	6.53612e-08	0.00118268
16440	26	7.49097e-08	0.00196514	2.48679e-08	0.000652373	1.21168e-06	0.0136933	3.98134e-07	0.00449933	-7.42436e-05	-1.32639	-2.49466e-05	-0.445682	1.72952e-06	0.0208707	5.63654e-07	0.00680182	1.11062e-06	0.0139355	3.6086e-07	0.0045279	1.84743e-07	0.0035515	6.15544e-08	0.00118332
16450	26	6.89114e-08	0.00196585	2.28767e-08	0.000652608	1.20771e-06	0.0137054	3.96829e-07	0.00450331	-7.42287e-05	-1.32714	-2.49416e-05	-0.445932	1.74307e-06	0.0208881	5.6807e-07	0.00680748	1.1122e-06	0.0139466	3.61373e-07	0.00453151	1.75654e-07	0.00355329	5.85261e-08	0.00118392
16460	26	5.10925e-08	0.00196646	1.69613e-08	0.000652809	1.21309e-06	0.0137175	3.98598e-07	0.00450728	-7.42169e-05	-1.32788	-2.49376e-05	-0.446181	1.73952e-06	0.0209055	5.66916e-07	0.00681316	1.12151e-06	0.0139578	3.64398e-07	0.00453513	1.6915e-07	0.003555	5.6359e-08	0.00118449
16470	26	3.24539e-08	0.00196688	1.07738e-08	0.00065295	1.21334e-06	0.0137296	3.9868e-07	0.00451127	-7.4196e-05	-1.32862	-2.49306e-05	-0.44643	1.73033e-06	0.0209228	5.6392e-07	0.0068188	1.11187e-06	0.0139689	3.61266e-07	0.00453876	1.63187e-07	0.00355669	5.43721e-08	0.00118505
16480	26	2.49493e-08	0.00196715	8.28249e-09	0.000653038	1.21571e-06	0.0137418	3.99459e-07	0.00451526	-7.41623e-05	-1.32936	-2.49193e-05	-0.44668	1.74081e-06	0.0209402	5.67336e-07	0.00682447	1.10765e-06	0.01398	3.59896e-07	0.00454237	1.55852e-07	0.00355827	5.19282e-08	0.00118557
16490	26	2.97489e-08	0.00196741	9.87581e-09	0.000653126	1.21266e-06	0.0137539	3.98455e-07	0.00451925	-7.41086e-05	-1.3301	-2.49012e-05	-0.446929	1.7303e-06	0.0209575	5.63911e-07	0.00683012	1.11966e-06	0.0139912	3.63798e-07	0.00454599	1.55504e-07	0.00355982	5.18121e-08	0.00118609
16500	26	3.8806e-08	0.00196775	1.28825e-08	0.000653239	1.2002e-06	0.013766	3.9436e-07	0.00452322	-7.40815e-05	-1.33085	-2.48921e-05	-0.447178	1.72249e-06	0.0209748	5.61364e-07	0.00683575	1.11017e-06	0.0140023	3.60714e-07	0.00454961	1.67921e-07	0.00356144	5.59496e-08	0.00118663
16510	26	4.20178e-08	0.00196815	1.39487e-08	0.00065337	1.19148e-06	0.0137779	3.91495e-07	0.00452714	-7.40714e-05	-1.33159	-2.48887e-05	-0.447427	1.71472e-06	0.020992	5.58833e-07	0.00684136	1.11692e-06	0.0140135	3.62909e-07	0.00455323	1.76658e-07	0.00356314	5.88606e-08	0.0011872
16520	26	5.79964e-08	0.00196865	1.92532e-08	0.000653536	1.20024e-06	0.0137899	3.94375e-07	0.00453107	-7.40611e-05	-1.33233	-2.48853e-05	-0.447676	1.71511e-06	0.0210092	5.5896e-07	0.00684694	1.12494e-06	0.0140247	3.65515e-07	0.00455687	1.85229e-07	0.00356496	6.17161e-08	0.00118781
16530	26	4.83173e-08	0.0019692	1.604e-08	0.00065372	1.21368e-06	0.0138019	3.9879e-07	0.00453504	-7.40439e-05	-1.33307	-2.48795e-05	-0.447924	1.72284e-06	0.0210264	5.61478e-07	0.00685255	1.12958e-06	0.014036	3.67022e-07	0.00456053	1.84698e-07	0.00356682	6.15392e-08	0.00118842
16540	26	3.61453e-08	0.00196961	1.19992e-08	0.000653856	1.21673e-06	0.0138141	3.99794e-07	0.00453903	-7.4024e-05	-1.33381	-2.48728e-05	-0.448173	1.71904e-06	0.0210436	5.60239e-07	0.00685815	1.13109e-06	0.0140473	3.67512e-07	0.00456421	1.81049e-07	0.00356864	6.03237e-08	0.00118903
16550	26	3.53226e-08	0.00196996	1.17261e-08	0.000653972	1.22359e-06	0.0138263	4.02048e-07	0.00454304	-7.40074e-05	-1.33455	-2.48672e-05	-0.448422	1.72449e-06	0.0210608	5.62014e-07	0.00686376	1.13147e-06	0.0140586	3.67634e-07	0.00456789	1.80002e-07	0.00357045	5.99747e-08	0.00118963
16560	26	3.89048e-08	0.00197034	1.29153e-08	0.000654097	1.23084e-06	0.0138386	4.04429e-07	0.00454707	-7.39763e-05	-1.33529	-2.48568e-05	-0.44867	1.72631e-06	0.021078	5.6261e-07	0.00686939	1.13449e-06	0.0140699	3.68616e-07	0.00457157	1.83851e-07	0.00357226	6.12572e-08	0.00119024
16570	26	3.49607e-08	0.00197071	1.1606e-08	0.000654222	1.22741e-06	0.0138508	4.03304e-07	0.00455111	-7.39579e-05	-1.33603	-2.48506e-05	-0.448919	1.72111e-06	0.0210953	5.60913e-07	0.00687501	1.13593e-06	0.0140813	3.69082e-07	0.00457526	1.7919e-07	0.00357408	5.97042e-08	0.00119084
16580	26	2.93989e-08	0.00197103	9.75961e-09	0.000654326	1.21906e-06	0.0138631	4.00558e-07	0.00455513	-7.39493e-05	-1.33677	-2.48477e-05	-0.449167	1.72413e-06	0.0211125	5.61899e-07	0.00688062	1.1331e-06	0.0140926	3.68163e-07	0.00457895	1.93575e-07	0.00357593	6.44972e-08	0.00119146
16590	26	3.06529e-08	0.00197134	1.01759e-08	0.000654429	1.22083e-06	0.0138753	4.01142e-07	0.00455914	-7.39218e-05	-1.33751	-2.48385e-05	-0.449416	1.72571e-06	0.0211297	5.62413e-07	0.00688624	1.1263e-06	0.0141039	3.65956e-07	0.00458262	1.81044e-07	0.00357782	6.03218e-08	0.00119209
16600	26	3.73249e-08	0.00197167	1.23908e-08	0.000654539	1.22927e-06	0.0138875	4.03912e-07	0.00456316	-7.39011e-05	-1.33825	-2.48315e-05	-0.449664	1.72677e-06	0.021147	5.62759e-07	0.00689186	1.12929e-06	0.0141152	3.66926e-07	0.00458628	1.71231e-07	0.00357957	5.70522e-08	0.00119267
16610	26	5.13745e-08	0.00197212	1.70549e-08	0.000654688	1.22906e-06	0.0138998	4.03845e-07	0.0045672	-7.3874e-05	-1.33898	-2.48224e-05	-0.449912	1.72716e-06	0.0211643	5.62885e-07	0.00689749	1.13133e-06	0.0141265	3.67588e-07	0.00458995	1.76131e-07	0.0035813	5.8685e-08	0.00119325
16620	26	5.70582e-08	0.00197267	1.89417e-08	0.00065487	1.22151e-06	0.0139121	4.01362e-07	0.00457123	-7.38557e-05	-1.33972	-2.48163e-05	-0.450161	1.7331e-06	0.0211816	5.64822e-07	0.00690313	1.13197e-06	0.0141378	3.67799e-07	0.00459363	1.69374e-07	0.00358304	5.64336e-08	0.00119383
16630	26	5.24256e-08	0.0019732	1.74038e-08	0.000655049	1.21293e-06	0.0139243	3.98543e-07	0.00457523	-7.38415e-05	-1.34046	-2.48115e-05	-0.450409	1.74934e-06	0.021199	5.70114e-07	0.0069088	1.14074e-06	0.0141492	3.70648e-07	0.00459732	1.65553e-07	0.00358471	5.51604e-08	0.00119439
16640	26	5.20712e-08	0.00197374	1.72862e-08	0.000655227	1.21833e-06	0.0139364	4.00319e-07	0.00457923	-7.38228e-05	-1.3412	-2.48052e-05	-0.450657	1.75911e-06	0.0212165	5.73298e-07	0.00691452	1.14385e-06	0.0141606	3.71656e-07	0.00460103	1.73402e-07	0.0035864	5.77755e-08	0.00119495
16650	26	5.70574e-08	0.00197427	1.89415e-08	0.000655403	1.20267e-06	0.0139485	3.95174e-07	0.00458321	-7.37954e-05	-1.34194	-2.4796e-05	-0.450905	1.75183e-06	0.0212341	5.70926e-07	0.00692025	1.14655e-06	0.014172	3.72536e-07	0.00460475	1.83318e-07	0.00358821	6.10797e-08	0.00119555
16660	26	6.37883e-08	0.00197486	2.11759e-08	0.000655599	1.21053e-06	0.0139606	3.97757e-07	0.00458717	-7.37652e-05	-1.34268	-2.47859e-05	-0.451153	1.74714e-06	0.0212516	5.69397e-07	0.00692594	1.15825e-06	0.0141835	3.76335e-07	0.00460849	1.83023e-07	0.00359004	6.09814e-08	0.00119616
16670	26	6.22999e-08	0.0019755	2.06818e-08	0.000655812	1.23519e-06	0.0139728	4.05859e-07	0.00459118	-7.37316e-05	-1.34341	-2.47746e-05	-0.451401	1.75506e-06	0.0212691	5.71978e-07	0.00693165	1.16207e-06	0.0141952	3.77576e-07	0.00461226	1.84058e-07	0.00359188	6.13262e-08	0.00119678
16680	26	6.6752e-08	0.00197613	2.21598e-08	0.000656021	1.2539e-06	0.0139852	4.12008e-07	0.00459527	-7.37129e-05	-1.34415	-2.47683e-05	-0.451648	1.75671e-06	0.0212866	5.72517e-07	0.00693737	1.16799e-06	0.0142068	3.79502e-07	0.00461604	1.79557e-07	0.00359369	5.98265e-08	0.00119738
16690	26	7.87065e-08	0.00197684	2.61284e-08	0.000656257	1.26836e-06	0.0139979	4.16759e-07	0.00459941	-7.36787e-05	-1.34489	-2.47568e-05	-0.451896	1.74272e-06	0.0213041	5.67957e-07	0.00694308	1.1661e-06	0.0142185	3.78887e-07	0.00461984	1.81977e-07	0.00359551	6.06327e-08	0.00119799
16700	26	7.83422e-08	0.00197765	2.60074e-08	0.000656524	1.27662e-06	0.0140106	4.19473e-07	0.0046036	-7.36635e-05	-1.34562	-2.47517e-05	-0.452144	1.73333e-06	0.0213215	5.64896e-07	0.00694874	1.17074e-06	0.0142302	3.80394e-07	0.00462363	1.91727e-07	0.00359739	6.38812e-08	0.00119861
16710	26	7.04974e-08	0.00197839	2.34032e-08	0.000656769	1.27634e-06	0.0140233	4.19378e-07	0.00460779	-7.36465e-05	-1.34636	-2.4746e-05	-0.452391	1.74296e-06	0.0213389	5.68034e-07	0.00695441	1.17017e-06	0.0142419	3.8021e-07	0.00462744	1.82291e-07	0.00359926	6.07373e-08	0.00119923
16720	26	7.03699e-08	0.00197909	2.33609e-08	0.000657004	1.28346e-06	0.0140362	4.21719e-07	0.004612	-7.36416e-05	-1.3471	-2.47443e-05	-0.452638	1.75994e-06	0.0213564	5.73568e-07	0.00696012	1.1704e-06	0.0142536	3.80282e-07	0.00463124	1.88037e-07	0.0036011	6.2652e-08	0.00119985
16730	26	7.27556e-08	0.00197981	2.41529e-08	0.000657243	1.26692e-06	0.0140489	4.16285e-07	0.00461619	-7.36267e-05	-1.34783	-2.47393e-05	-0.452886	1.76046e-06	0.021374	5.73739e-07	0.00696585	1.18139e-06	0.0142653	3.83854e-07	0.00463506	1.98364e-07	0.00360304	6.60925e-08	0.00120049
16740	26	6.47308e-08	0.00198048	2.14888e-08	0.000657465	1.25856e-06	0.0140615	4.13536e-07	0.00462033	-7.36115e-05	-1.34857	-2.47342e-05	-0.453133	1.75621e-06	0.0213916	5.72353e-07	0.00697159	1.16412e-06	0.0142771	3.78244e-07	0.00463887	1.98005e-07	0.00360502	6.59731e-08	0.00120115
16750	26	7.54963e-08	0.00198119	2.50627e-08	0.000657699	1.2499e-06	0.0140741	4.10691e-07	0.00462446	-7.35933e-05	-1.34931	-2.47281e-05	-0.453381	1.75498e-06	0.0214092	5.71954e-07	0.00697731	1.1501e-06	0.0142886	3.73688e-07	0.00464263	1.94484e-07	0.00360699	6.47998e-08	0.00120181
16760	26	8.12423e-08	0.00198197	2.69702e-08	0.000657959	1.23409e-06	0.0140865	4.05499e-07	0.00462854	-7.3583e-05	-1.35004	-2.47246e-05	-0.453628	1.73463e-06	0.0214266	5.6532e-07	0.00698299	1.14558e-06	0.0143001	3.7222e-07	0.00464636	1.83391e-07	0.00360888	6.11039e-08	0.00120244
16770	26	8.75765e-08	0.00198284	2.9073e-08	0.000658246	1.24305e-06	0.0140989	4.08443e-07	0.00463261	-7.3559e-05	-1.35078	-2.47166e-05	-0.453875	1.74588e-06	0.021444	5.68987e-07	0.00698867	1.15829e-06	0.0143116	3.76348e-07	0.0046501	1.81884e-07	0.0036107	6.06017e-08	0.00120305
16780	26	8.01087e-08	0.00198367	2.65939e-08	0.000658524	1.24598e-06	0.0141113	4.09404e-07	0.0046367	-7.35334e-05	-1.35151	-2.4708e-05	-0.454122	1.73305e-06	0.0214614	5.64805e-07	0.00699434	1.15879e-06	0.0143232	3.76512e-07	0.00465387	1.85525e-07	0.00361254	6.1815e-08	0.00120366
16790	26	7.78792e-08	0.00198445	2.58537e-08	0.000658782	1.25162e-06	0.0141238	4.11256e-07	0.00464081	-7.34995e-05	-1.35225	-2.46966e-05	-0.454369	1.73861e-06	0.0214788	5.66619e-07	0.007	1.15002e-06	0.0143347	3.73661e-07	0.00465761	1.94028e-07	0.00361443	6.46479e-08	0.00120429
16800	26	7.862e-08	0.00198523	2.60996e-08	0.000659042	1.24155e-06	0.0141363	4.07947e-07	0.0046449	-7.34853e-05	-1.35298	-2.46918e-05	-0.454616	1.7424e-06	0.0214962	5.67853e-07	0.00700567	1.14758e-06	0.0143462	3.72869e-07	0.00466135	2.00175e-07	0.00361641	6.66962e-08	0.00120495
16810	26	7.751e-08	0.00198601	2.57312e-08	0.000659301	1.24146e-06	0.0141487	4.07919e-07	0.00464898	-7.34656e-05	-1.35372	-2.46852e-05	-0.454863	1.734e-06	0.0215136	5.65114e-07	0.00701134	1.15036e-06	0.0143577	3.73773e-07	0.00466508	2.03314e-07	0.00361843	6.7742e-08	0.00120562
16820	26	7.70546e-08	0.00198679	2.558e-08	0.00065956	1.25816e-06	0.0141612	4.13407e-07	0.00465309	-7.34521e-05	-1.35445	-2.46806e-05	-0.45511	1.73075e-06	0.0215309	5.64055e-07	0.00701698	1.14972e-06	0.0143692	3.73566e-07	0.00466882	2.04291e-07	0.00362047	6.80675e-08	0.0012063
16830	26	6.59027e-08	0.00198751	2.18779e-08	0.000659798	1.26066e-06	0.0141738	4.14229e-07	0.00465723	-7.34323e-05	-1.35519	-2.4674e-05	-0.455357	1.73243e-06	0.0215482	5.64603e-07	0.00702263	1.14536e-06	0.0143807	3.72148e-07	0.00467254	1.90226e-07	0.00362244	6.33814e-08	0.00120696
16840	26	5.6845e-08	0.00198812	1.88709e-08	0.000660001	1.26649e-06	0.0141864	4.16142e-07	0.00466138	-7.34251e-05	-1.35592	-2.46716e-05	-0.455603	1.72862e-06	0.0215655	5.63361e-07	0.00702826	1.15194e-06	0.0143922	3.74285e-07	0.00467628	1.78781e-07	0.00362428	5.95678e-08	0.00120757
16850	26	5.21813e-08	0.00198867	1.73227e-08	0.000660182	1.26383e-06	0.0141991	4.15269e-07	0.00466554	-7.34118e-05	-1.35666	-2.46671e-05	-0.45585	1.73319e-06	0.0215828	5.64851e-07	0.00703391	1.15072e-06	0.0144037	3.73889e-07	0.00468002	1.69891e-07	0.00362602	5.66057e-08	0.00120815
16860	26	2.70179e-08	0.00198905	8.96918e-09	0.000660311	1.257e-06	0.0142117	4.13024e-07	0.00466968	-7.33957e-05	-1.35739	-2.46617e-05	-0.456097	1.73238e-06	0.0216002	5.64587e-07	0.00703956	1.13625e-06	0.0144151	3.69187e-07	0.00468373	1.78565e-07	0.00362774	5.94958e-08	0.00120872
16870	26	2.807e-08	0.00198931	9.31847e-09	0.000660396	1.24456e-06	0.0142242	4.08939e-07	0.00467379	-7.33793e-05	-1.35812	-2.46562e-05	-0.456343	1.72096e-06	0.0216174	5.60864e-07	0.00704519	1.12907e-06	0.0144264	3.66856e-07	0.00468741	1.92568e-07	0.00362962	6.41616e-08	0.00120935
16880	26	4.12643e-08	0.00198966	1.36986e-08	0.000660511	1.24053e-06	0.0142366	4.07614e-07	0.00467787	-7.33707e-05	-1.35886	-2.46533e-05	-0.45659	1.71469e-06	0.0216346	5.58822e-07	0.00705078	1.12537e-06	0.0144377	3.65654e-07	0.00469107	1.71681e-07	0.00363145	5.72024e-08	0.00120996
16890	26	4.83388e-08	0.00199011	1.60471e-08	0.00066066	1.22807e-06	0.014249	4.03519e-07	0.00468193	-7.33388e-05	-1.35959	-2.46426e-05	-0.456836	1.71785e-06	0.0216518	5.59852e-07	0.00705639	1.12076e-06	0.0144489	3.64155e-07	0.00469472	1.57553e-07	0.00363307	5.24949e-08	0.0012105
16900	26	3.46718e-08	0.00199053	1.15101e-08	0.0006608	1.22252e-06	0.0142612	4.01697e-07	0.00468595	-7.33061e-05	-1.36032	-2.46316e-05	-0.457083	1.69775e-06	0.0216689	5.53301e-07	0.00706196	1.12365e-06	0.0144602	3.65094e-07	0.00469837	1.70197e-07	0.00363471	5.67078e-08	0.00121104
16910	26	3.81034e-08	0.00199088	1.26493e-08	0.000660919	1.21486e-06	0.0142734	3.99178e-07	0.00468996	-7.32863e-05	-1.36106	-2.46249e-05	-0.457329	1.69878e-06	0.0216859	5.53636e-07	0.0070675	1.10921e-06	0.0144713	3.60403e-07	0.004702	1.59948e-07	0.00363635	5.32928e-08	0.00121159
16920	26	4.8377e-08	0.00199132	1.60598e-08	0.000661062	1.2181e-06	0.0142856	4.00243e-07	0.00469395	-7.32754e-05	-1.36179	-2.46213e-05	-0.457575	1.69525e-06	0.0217029	5.52486e-07	0.00707303	1.1106e-06	0.0144824	3.60853e-07	0.0047056	1.55062e-07	0.00363792	5.1665e-08	0.00121212
16930	26	6.80025e-08	0.0019919	2.25749e-08	0.000661255	1.22351e-06	0.0142978	4.02022e-07	0.00469797	-7.32823e-05	-1.36252	-2.46236e-05	-0.457821	1.70379e-06	0.0217199	5.5527e-07	0.00707857	1.11059e-06	0.0144935	3.60851e-07	0.00470921	1.74135e-07	0.00363956	5.80199e-08	0.00121266
[truncated: 1,584 more rows]

## Sheet: Statistics
Data series	Section name	No. of data	Start time	End time	Duration	Mean	Mean std. dev.	Slope	Slope std. dev.	Minimum	Maximum	Integral	Peak Area
Temperature [Temperature]
Heat flow [Signal, Ch 1:1]
[truncated: 71 more rows]
