# Supplementary material for: Microbial bioenergetics of coral-algal interactions
Source: PeerJ. 2017 Jun 21;5:e3423. doi: 10.7717/peerj.3423 (PMC5482263; doi:10.7717/peerj.3423)
Supplement: Data S8 — Raw data exported from the TAM III calorimeter for the second experimental replicate. [file peerj-05-3423-s013.xls]

## Sheet: Experiment info
Summary
Name	Optode Tank 1 Final (6-12-13).rslt
Start time	2013-06-12 22:01:10
End time	2013-06-13 21:32:33
Operator	Roach
Results file path	C:\Users\Frohwer\Documents\Optode Tank 1 Final (6-12-13).rslt
General Experiment Info
Bath temperature	26°C
	Sample - Ch 1:1	Sample - Ch 1:2	Sample - Ch 1:3	Sample - Ch 1:4	Sample - Ch 1:5	Sample - Ch 1:6
Total mass	2.9747g	3.069g	3.0641g	3.0709g	3.0523g	3.0446g
Name	sigma	Coral 1 Final	Algae 1 Final	Interface 1 Final	Water Column 1 Final	.02 Filtered

## Sheet: Raw data
2013-06-12 22:18:04	Temperature [Temperature]	Heat flow [Signal, Ch 1:1]	Heat [Signal, Ch 1:1]	Normalized heat flow [Signal, Ch 1:1]	Normalized heat [Signal, Ch 1:1]	Heat flow [Signal, Ch 1:2]	Heat [Signal, Ch 1:2]	Normalized heat flow [Signal, Ch 1:2]	Normalized heat [Signal, Ch 1:2]	Heat flow [Signal, Ch 1:3]	Heat [Signal, Ch 1:3]	Normalized heat flow [Signal, Ch 1:3]	Normalized heat [Signal, Ch 1:3]	Heat flow [Signal, Ch 1:4]	Heat [Signal, Ch 1:4]	Normalized heat flow [Signal, Ch 1:4]	Normalized heat [Signal, Ch 1:4]	Heat flow [Signal, Ch 1:5]	Heat [Signal, Ch 1:5]	Normalized heat flow [Signal, Ch 1:5]	Normalized heat [Signal, Ch 1:5]	Heat flow [Signal, Ch 1:6]	Heat [Signal, Ch 1:6]	Normalized heat flow [Signal, Ch 1:6]	Normalized heat [Signal, Ch 1:6]	Time markers
s	°C	W	J	W/g	J/g	W	J	W/g	J/g	W	J	W/g	J/g	W	J	W/g	J/g	W	J	W/g	J/g	W	J	W/g	J/g
-1010	26
-1000	26	-8.87335e-08		-2.98294e-08		-2.47462e-08		-8.06328e-09		-3.77896e-08		-1.2333e-08		-4.62404e-08		-1.50576e-08		-7.09545e-08		-2.32462e-08		-1.21746e-07		-3.99874e-08
-990	26	-8.92084e-08		-2.99891e-08		-1.53272e-08		-4.99419e-09		-4.12926e-08		-1.34763e-08		-6.30162e-08		-2.05204e-08		-7.34422e-08		-2.40613e-08		-1.05831e-07		-3.47604e-08
-980	26	-8.79098e-08		-2.95525e-08		-8.2816e-09		-2.69847e-09		-4.27323e-08		-1.39461e-08		-7.44175e-08		-2.42331e-08		-7.73678e-08		-2.53474e-08		-9.7913e-08		-3.21596e-08
-970	26	-8.20571e-08		-2.7585e-08		-7.67504e-09		-2.50083e-09		-4.22102e-08		-1.37757e-08		-8.01306e-08		-2.60935e-08		-8.30361e-08		-2.72044e-08		-9.78492e-08		-3.21386e-08
-960	26	-6.7441e-08		-2.26715e-08		-1.98356e-08		-6.46323e-09		-4.15576e-08		-1.35627e-08		-8.37602e-08		-2.72755e-08		-8.99274e-08		-2.94622e-08		-9.90517e-08		-3.25336e-08
-950	26	-6.91703e-08		-2.32529e-08		-1.40098e-08		-4.56493e-09		-4.96502e-08		-1.62038e-08		-9.92455e-08		-3.23181e-08		-1.0235e-07		-3.3532e-08		-9.54477e-08		-3.13498e-08
-940	26	-6.44253e-08		-2.16577e-08		-1.38601e-08		-4.51617e-09		-5.44646e-08		-1.77751e-08		-1.05054e-07		-3.42094e-08		-1.06609e-07		-3.49275e-08		-9.64419e-08		-3.16764e-08
-930	26	-5.95769e-08		-2.00279e-08		-1.32759e-08		-4.3258e-09		-5.96056e-08		-1.94529e-08		-1.0834e-07		-3.52796e-08		-1.00324e-07		-3.28683e-08		-9.97411e-08		-3.276e-08
-920	26	-6.03444e-08		-2.02859e-08		-6.92752e-09		-2.25726e-09		-6.80932e-08		-2.22229e-08		-1.16418e-07		-3.79101e-08		-8.7183e-08		-2.8563e-08		-1.02208e-07		-3.35703e-08
-910	26	-5.09452e-08		-1.71262e-08		-7.24528e-09		-2.36079e-09		-5.38938e-08		-1.75888e-08		-1.13049e-07		-3.68129e-08		-8.82314e-08		-2.89065e-08		-8.75884e-08		-2.87684e-08
-900	26	-4.33985e-08		-1.45892e-08		-3.98163e-10		-1.29737e-10		-4.90355e-08		-1.60032e-08		-1.0453e-07		-3.40389e-08		-8.73222e-08		-2.86087e-08		-6.98035e-08		-2.2927e-08
-890	26	-3.6006e-08		-1.21041e-08		8.63823e-09		2.81467e-09		-4.91269e-08		-1.60331e-08		-9.65665e-08		-3.14457e-08		-8.28857e-08		-2.71552e-08		-5.44928e-08		-1.78982e-08
-880	26	-2.26928e-08		-7.62859e-09		6.88681e-09		2.24399e-09		-3.87054e-08		-1.26319e-08		-9.93352e-08		-3.23473e-08		-7.50392e-08		-2.45845e-08		-5.04232e-08		-1.65615e-08
-870	26	-1.02262e-08		-3.43774e-09		6.95287e-09		2.26552e-09		-3.24072e-08		-1.05764e-08		-9.63844e-08		-3.13864e-08		-7.04727e-08		-2.30884e-08		-4.8259e-08		-1.58507e-08
-860	26	1.53325e-09		5.15431e-10		8.53662e-09		2.78157e-09		-2.9552e-08		-9.64458e-09		-8.86576e-08		-2.88702e-08		-6.8645e-08		-2.24896e-08		-4.76861e-08		-1.56625e-08
-850	26	1.42791e-08		4.80019e-09		5.01519e-09		1.63414e-09		-2.56544e-08		-8.37256e-09		-8.53723e-08		-2.78004e-08		-7.071e-08		-2.31661e-08		-3.27222e-08		-1.07476e-08
-840	26	2.48441e-08		8.35182e-09		2.69712e-09		8.78827e-10		-1.97345e-08		-6.44054e-09		-8.11813e-08		-2.64357e-08		-7.26024e-08		-2.37861e-08		-1.5057e-08		-4.94547e-09
-830	26	3.10453e-08		1.04364e-08		5.6819e-09		1.85138e-09		-1.09875e-08		-3.58588e-09		-7.27507e-08		-2.36903e-08		-7.15192e-08		-2.34312e-08		-1.45464e-09		-4.77776e-10
-820	26	3.50353e-08		1.17778e-08		1.70866e-08		5.56748e-09		-2.57099e-09		-8.39068e-10		-6.11577e-08		-1.99153e-08		-5.76993e-08		-1.89036e-08		1.76465e-09		5.796e-10
-810	26	3.37117e-08		1.13328e-08		1.58026e-08		5.14912e-09		4.71559e-09		1.53898e-09		-4.96897e-08		-1.61808e-08		-4.94792e-08		-1.62105e-08		4.2039e-09		1.38077e-09
-800	26	2.92344e-08		9.82769e-09		1.98324e-08		6.46216e-09		1.05936e-08		3.45734e-09		-3.85129e-08		-1.25412e-08		-4.03982e-08		-1.32353e-08		1.32229e-08		4.34306e-09
-790	26	2.66698e-08		8.96554e-09		3.51798e-08		1.1463e-08		1.58728e-08		5.18023e-09		-3.26551e-08		-1.06337e-08		-2.30895e-08		-7.56463e-09		2.09468e-08		6.87998e-09
-780	26	2.45153e-08		8.24126e-09		4.24274e-08		1.38245e-08		2.33201e-08		7.61073e-09		-2.54907e-08		-8.30071e-09		-1.11329e-08		-3.64736e-09		2.41232e-08		7.92327e-09
-770	26	2.1887e-08		7.35773e-09		4.72137e-08		1.53841e-08		2.75833e-08		9.0021e-09		-1.55593e-08		-5.06669e-09		-5.16885e-11		-1.69343e-11		2.34772e-08		7.71111e-09
-760	26	1.84833e-08		6.2135e-09		5.09398e-08		1.65982e-08		2.67748e-08		8.73823e-09		-8.98097e-09		-2.92454e-09		1.11568e-08		3.6552e-09		3.1447e-08		1.03288e-08
-750	26	1.48883e-08		5.00496e-09		4.90124e-08		1.59701e-08		2.43658e-08		7.95203e-09		-5.83255e-09		-1.8993e-09		2.00652e-08		6.5738e-09		3.59331e-08		1.18022e-08
-740	26	8.57464e-09		2.88252e-09		4.40497e-08		1.43531e-08		2.86268e-08		9.34266e-09		-5.42935e-09		-1.768e-09		2.52463e-08		8.27122e-09		3.50475e-08		1.15114e-08
-730	26	-2.25012e-09		-7.5642e-10		3.90854e-08		1.27355e-08		3.71954e-08		1.21391e-08		-4.16279e-09		-1.35556e-09		2.46864e-08		8.0878e-09		3.4148e-08		1.12159e-08
-720	26	-1.39758e-08		-4.69823e-09		3.9146e-08		1.27553e-08		3.74317e-08		1.22162e-08		8.93954e-10		2.91105e-10		2.25636e-08		7.39232e-09		3.40335e-08		1.11783e-08
-710	26	-2.32279e-08		-7.8085e-09		4.07228e-08		1.32691e-08		3.40051e-08		1.10979e-08		1.04498e-08		3.40283e-09		1.87985e-08		6.1588e-09		3.46848e-08		1.13922e-08
-700	26	-1.32206e-08		-4.44434e-09		4.15067e-08		1.35245e-08		3.87851e-08		1.26579e-08		1.48106e-08		4.82288e-09		1.54129e-08		5.04961e-09		3.20336e-08		1.05215e-08
-690	26	-6.01952e-09		-2.02357e-09		4.23612e-08		1.38029e-08		4.32139e-08		1.41033e-08		1.62347e-08		5.28662e-09		1.34109e-08		4.39369e-09		2.6942e-08		8.84912e-09
-680	26	-1.17475e-08		-3.94915e-09		3.96063e-08		1.29053e-08		4.40751e-08		1.43844e-08		1.74644e-08		5.68707e-09		2.05803e-08		6.74256e-09		2.02967e-08		6.66647e-09
-670	26	-1.02058e-08		-3.43085e-09		2.71922e-08		8.86029e-09		5.09793e-08		1.66376e-08		2.11994e-08		6.90332e-09		2.7783e-08		9.10231e-09		9.02344e-09		2.96375e-09
-660	26	-9.73854e-09		-3.27379e-09		2.07005e-08		6.74502e-09		4.7938e-08		1.5645e-08		1.78055e-08		5.79815e-09		2.72715e-08		8.93473e-09		7.9694e-09		2.61755e-09
-650	26	-8.94066e-09		-3.00557e-09		2.92496e-08		9.53067e-09		4.10393e-08		1.33936e-08		1.22171e-08		3.97836e-09		2.07701e-08		6.80473e-09		1.30364e-08		4.28181e-09
-640	26	-5.17624e-10		-1.74009e-10		3.20408e-08		1.04402e-08		3.71976e-08		1.21398e-08		1.29959e-08		4.23197e-09		2.16563e-08		7.09508e-09		3.30475e-08		1.08545e-08
-630	26	8.20332e-09		2.7577e-09		2.9883e-08		9.73704e-09		3.28741e-08		1.07288e-08		1.60257e-08		5.21856e-09		2.67766e-08		8.77259e-09		4.82661e-08		1.5853e-08
-620	26	1.69027e-08		5.68216e-09		3.14541e-08		1.0249e-08		2.76717e-08		9.03092e-09		1.91623e-08		6.23995e-09		3.26286e-08		1.06898e-08		5.27274e-08		1.73183e-08
-610	26	2.19071e-08		7.36446e-09		3.30929e-08		1.0783e-08		2.57059e-08		8.38939e-09		2.09706e-08		6.82881e-09		3.709e-08		1.21515e-08		5.47862e-08		1.79946e-08
-600	26	2.55964e-08		8.60469e-09		3.8313e-08		1.24839e-08		2.72331e-08		8.88779e-09		2.80725e-08		9.14147e-09		4.15395e-08		1.36092e-08		6.00205e-08		1.97137e-08
-590	26	3.73416e-08		1.25531e-08		4.23228e-08		1.37904e-08		2.7558e-08		8.99382e-09		3.33202e-08		1.08503e-08		4.60501e-08		1.5087e-08		6.50976e-08		2.13813e-08
-580	26	4.79362e-08		1.61146e-08		4.1235e-08		1.3436e-08		2.38754e-08		7.79198e-09		3.00564e-08		9.78749e-09		4.97159e-08		1.6288e-08		6.72806e-08		2.20983e-08
-570	26	5.37607e-08		1.80726e-08		4.53419e-08		1.47742e-08		2.38569e-08		7.78595e-09		3.08992e-08		1.00619e-08		4.96709e-08		1.62733e-08		7.58294e-08		2.49062e-08
-560	26	5.76429e-08		1.93777e-08		4.59351e-08		1.49674e-08		2.51203e-08		8.19828e-09		3.17396e-08		1.03356e-08		5.00489e-08		1.63971e-08		8.25874e-08		2.71259e-08
-550	26	5.92889e-08		1.9931e-08		4.11773e-08		1.34172e-08		2.78111e-08		9.07644e-09		3.2189e-08		1.04819e-08		5.13622e-08		1.68274e-08		8.62673e-08		2.83345e-08
-540	26	5.87785e-08		1.97595e-08		3.63907e-08		1.18575e-08		2.99845e-08		9.78576e-09		3.53386e-08		1.15076e-08		4.87346e-08		1.59665e-08		8.22495e-08		2.70149e-08
-530	26	5.60961e-08		1.88577e-08		3.21795e-08		1.04853e-08		3.286e-08		1.07242e-08		4.25056e-08		1.38414e-08		4.56992e-08		1.49721e-08		7.30447e-08		2.39915e-08
-520	26	4.84172e-08		1.62763e-08		3.08266e-08		1.00445e-08		4.0457e-08		1.32035e-08		6.22088e-08		2.02575e-08		5.07724e-08		1.66341e-08		5.84273e-08		1.91905e-08
-510	26	4.89678e-08		1.64614e-08		3.0075e-08		9.79962e-09		4.63579e-08		1.51294e-08		7.59886e-08		2.47447e-08		5.91904e-08		1.93921e-08		4.92158e-08		1.6165e-08
-500	26	5.68154e-08		1.90996e-08		2.91993e-08		9.51428e-09		4.84018e-08		1.57964e-08		7.80609e-08		2.54195e-08		6.45819e-08		2.11584e-08		4.57528e-08		1.50275e-08
-490	26	6.12127e-08		2.05778e-08		2.90499e-08		9.4656e-09		4.82696e-08		1.57533e-08		7.35821e-08		2.39611e-08		6.24716e-08		2.04671e-08		4.13925e-08		1.35954e-08
-480	26	5.12347e-08		1.72235e-08		3.17803e-08		1.03553e-08		4.86376e-08		1.58734e-08		6.83642e-08		2.2262e-08		5.79211e-08		1.89762e-08		3.61183e-08		1.18631e-08
-470	26	3.7213e-08		1.25098e-08		3.12852e-08		1.0194e-08		5.30475e-08		1.73126e-08		6.74346e-08		2.19592e-08		6.34051e-08		2.07729e-08		2.82372e-08		9.27451e-09
-460	26	2.55018e-08		8.57289e-09		2.72276e-08		8.8718e-09		5.23957e-08		1.70999e-08		6.54751e-08		2.13212e-08		7.3561e-08		2.41002e-08		2.5602e-08		8.40899e-09
-450	26	1.8402e-08		6.18618e-09		2.10849e-08		6.87027e-09		4.15663e-08		1.35656e-08		5.89483e-08		1.91958e-08		8.16575e-08		2.67528e-08		3.2056e-08		1.05288e-08
-440	26	1.73174e-08		5.82155e-09		8.93958e-09		2.91286e-09		3.37347e-08		1.10096e-08		6.08535e-08		1.98162e-08		9.43108e-08		3.08983e-08		3.37079e-08		1.10714e-08
-430	26	1.78931e-08		6.01511e-09		-1.90586e-09		-6.21005e-10		2.89809e-08		9.45822e-09		6.00565e-08		1.95566e-08		9.90108e-08		3.24381e-08		3.31357e-08		1.08834e-08
-420	26	2.02294e-08		6.80048e-09		-1.13732e-08		-3.70582e-09		2.74905e-08		8.97181e-09		5.63945e-08		1.83642e-08		9.52784e-08		3.12153e-08		3.02055e-08		9.92102e-09
-410	26	1.97336e-08		6.63381e-09		-1.98678e-08		-6.47371e-09		1.46e-08		4.76487e-09		4.83933e-08		1.57587e-08		9.37374e-08		3.07104e-08		3.3254e-08		1.09223e-08
-400	26	1.46499e-08		4.92482e-09		-2.57561e-08		-8.39235e-09		4.31654e-09		1.40875e-09		4.73926e-08		1.54328e-08		9.09984e-08		2.98131e-08		3.48076e-08		1.14326e-08
-390	26	4.48718e-09		1.50845e-09		-2.86326e-08		-9.32961e-09		-4.90596e-10		-1.60111e-10		5.58659e-08		1.8192e-08		8.63496e-08		2.829e-08		3.33321e-08		1.09479e-08
-380	26	-8.83202e-09		-2.96904e-09		-3.65516e-08		-1.19099e-08		3.65561e-09		1.19304e-09		6.05919e-08		1.9731e-08		6.9042e-08		2.26196e-08		3.20586e-08		1.05297e-08
-370	26	-1.89233e-08		-6.36142e-09		-4.31093e-08		-1.40467e-08		-1.83667e-09		-5.99416e-10		5.77625e-08		1.88096e-08		5.61161e-08		1.83849e-08		1.32513e-08		4.3524e-09
-360	26	-2.46948e-08		-8.3016e-09		-4.94137e-08		-1.61009e-08		-1.07768e-08		-3.51711e-09		5.97923e-08		1.94706e-08		5.07918e-08		1.66405e-08		1.85194e-09		6.08271e-10
-350	26	-2.70387e-08		-9.08955e-09		-5.02217e-08		-1.63642e-08		-1.60934e-08		-5.25225e-09		6.53205e-08		2.12708e-08		4.75112e-08		1.55657e-08		-2.71734e-09		-8.92513e-10
-340	26	-2.58144e-08		-8.67798e-09		-4.02916e-08		-1.31286e-08		-1.07281e-08		-3.50123e-09		7.29185e-08		2.3745e-08		4.25354e-08		1.39355e-08		-1.59988e-09		-5.25482e-10
-330	26	-1.70129e-08		-5.71921e-09		-5.08965e-08		-1.65841e-08		-1.96159e-08		-6.40185e-09		6.95798e-08		2.26578e-08		3.67933e-08		1.20543e-08		-2.76236e-09		-9.07298e-10
-320	26	-1.06908e-08		-3.5939e-09		-5.44478e-08		-1.77412e-08		-2.39206e-08		-7.80673e-09		7.35893e-08		2.39634e-08		3.53604e-08		1.15848e-08		-3.47665e-09		-1.14191e-09
-310	26	-1.07012e-08		-3.59741e-09		-4.70954e-08		-1.53455e-08		-1.79004e-08		-5.84198e-09		7.86733e-08		2.5619e-08		3.7048e-08		1.21377e-08		-1.48898e-09		-4.89055e-10
-300	26	-1.96932e-08		-6.62022e-09		-3.63742e-08		-1.18521e-08		-9.2408e-09		-3.01583e-09		7.6051e-08		2.4765e-08		3.72365e-08		1.21995e-08		2.55874e-09		8.40418e-10
-290	26	-1.46184e-08		-4.91425e-09		-3.04881e-08		-9.93423e-09		-2.88136e-09		-9.40361e-10		6.11901e-08		1.99258e-08		3.88122e-08		1.27157e-08		8.2467e-09		2.70863e-09
-280	26	-7.06439e-09		-2.37483e-09		-2.42176e-08		-7.89105e-09		-9.58108e-09		-3.12688e-09		4.79723e-08		1.56216e-08		3.77163e-08		1.23567e-08		8.14152e-09		2.67408e-09
-270	26	-1.8806e-09		-6.322e-10		-1.80239e-08		-5.87288e-09		-9.1583e-09		-2.9889e-09		4.34763e-08		1.41575e-08		3.25271e-08		1.06566e-08		6.81308e-10		2.23776e-10
-260	26	-1.79066e-10		-6.01964e-11		-2.54867e-08		-8.30455e-09		-8.34931e-09		-2.72488e-09		3.93745e-08		1.28218e-08		2.99447e-08		9.81054e-09		-5.85182e-09		-1.92203e-09
-250	26	3.86537e-11		1.29942e-11		-3.55243e-08		-1.15752e-08		-9.49316e-09		-3.09819e-09		3.30251e-08		1.07542e-08		2.81379e-08		9.21858e-09		-7.95917e-09		-2.61419e-09
-240	26	-3.71456e-09		-1.24872e-09		-3.76338e-08		-1.22626e-08		-1.18027e-09		-3.85195e-10		3.08362e-08		1.00414e-08		2.68755e-08		8.80501e-09		-1.41788e-08		-4.65703e-09
-230	26	-1.40995e-10		-4.73981e-11		-3.81356e-08		-1.24261e-08		4.44558e-09		1.45086e-09		2.68629e-08		8.74758e-09		1.75251e-08		5.74162e-09		-1.29791e-08		-4.26298e-09
-220	26	8.42915e-09		2.83361e-09		-3.76617e-08		-1.22717e-08		9.47863e-10		3.09345e-10		1.9e-08		6.18711e-09		2.47767e-09		8.11738e-10		-7.20618e-09		-2.36687e-09
-210	26	1.69424e-08		5.6955e-09		-3.778e-08		-1.23102e-08		-1.48702e-08		-4.85303e-09		8.37937e-09		2.72863e-09		-1.3377e-08		-4.38259e-09		-1.39049e-08		-4.56708e-09
-200	26	1.68817e-08		5.6751e-09		-3.89425e-08		-1.2689e-08		-2.98968e-08		-9.75711e-09		-5.33414e-09		-1.73699e-09		-2.97565e-08		-9.74889e-09		-1.63504e-08		-5.3703e-09
-190	26	1.45819e-08		4.90197e-09		-3.99097e-08		-1.30042e-08		-4.15292e-08		-1.35535e-08		-1.85643e-08		-6.04522e-09		-4.51712e-08		-1.47991e-08		-1.7382e-08		-5.70912e-09
-180	26	1.58275e-08		5.32072e-09		-3.84121e-08		-1.25161e-08		-3.96416e-08		-1.29374e-08		-2.49065e-08		-8.11048e-09		-5.55817e-08		-1.82098e-08		-1.88554e-08		-6.19306e-09
-170	26	1.74695e-08		5.8727e-09		-4.18218e-08		-1.36272e-08		-3.936e-08		-1.28455e-08		-2.81793e-08		-9.17624e-09		-6.66159e-08		-2.18248e-08		-1.85965e-08		-6.10804e-09
-160	26	1.78444e-08		5.99871e-09		-4.83627e-08		-1.57584e-08		-4.12055e-08		-1.34478e-08		-3.18318e-08		-1.03656e-08		-7.83518e-08		-2.56698e-08		-2.4616e-08		-8.08513e-09
-150	26	2.03614e-08		6.84487e-09		-5.25669e-08		-1.71284e-08		-4.5018e-08		-1.46921e-08		-3.91772e-08		-1.27576e-08		-8.81513e-08		-2.88803e-08		-3.42413e-08		-1.12466e-08
-140	26	2.9482e-08		9.91093e-09		-5.55866e-08		-1.81123e-08		-5.47748e-08		-1.78763e-08		-4.98449e-08		-1.62314e-08		-9.56461e-08		-3.13357e-08		-3.49285e-08		-1.14723e-08
-130	26	2.78689e-08		9.36865e-09		-5.59761e-08		-1.82392e-08		-6.17516e-08		-2.01533e-08		-6.71592e-08		-2.18696e-08		-1.11665e-07		-3.65838e-08		-4.43049e-08		-1.4552e-08
-120	26	2.01904e-08		6.78739e-09		-5.7733e-08		-1.88117e-08		-6.59217e-08		-2.15142e-08		-7.82567e-08		-2.54833e-08		-1.22964e-07		-4.02857e-08
-110	26
-100	26
-90	26
-80	26
-70	26
-60	26
-50	26
-40	26
-30	26
-20	26
-10	26
0	26																									Reaction start
10	26
20	26
30	26
40	26
50	26
60	26
70	26
80	26
90	26
100	26
110	26
120	26
130	26
140	26
150	26
160	26
170	26
180	26
190	26
200	26
210	26
220	26
230	26
240	26
250	26
260	26
270	26
280	26
290	26
300	26
310	26
320	26
330	26
340	26
350	26
360	26
370	26
380	26
390	26
400	26
410	26
420	26
430	26
440	26
450	26
460	26
470	26
480	26
490	26
500	26
510	26
520	26
530	26
540	26
550	26
560	26
570	26
580	26
590	26
600	26
610	26
620	26
630	26
640	26
650	26
660	26
670	26
680	26
690	26
700	26
710	26
720	26
730	26
740	26
750	26
760	26
770	26
780	26
790	26
800	26
810	26
820	26
830	26
840	26
850	26
860	26
870	26
880	26
890	26
900	26
910	26
920	26
930	26																									Measuring position
940	26
950	26
960	26
970	26
980	26
990	26
1000	26
1010	26
1020	26
1030	26
1040	26
1050	26
1060	26
1070	26
1080	26
1090	26
1100	26
1110	26
1120	26
1130	26
1140	26
1150	26
1160	26
1170	26
1180	26
1190	26
1200	26
1210	26
1220	26
1230	26
1240	26
1250	26
1260	26
1270	26
1280	26
1290	26
1300	26
1310	26
1320	26
1330	26
1340	26
1350	26
1360	26
1370	26
1380	26
1390	26
1400	26
1410	26
1420	26
1430	26
1440	26
1450	26
1460	26
1470	26
1480	26
1490	26
1500	26
1510	26
1520	26
1530	26
1540	26
1550	26
1560	26
1570	26
1580	26
1590	26
1600	26
1610	26
1620	26
1630	26
1640	26
1650	26
1660	26
1670	26
1680	26
1690	26
1700	26
1710	26
1720	26
1730	26
1740	26
1750	26
1760	26
1770	26
1780	26
1790	26
1800	26
1810	26
1820	26
1830	26
1840	26
1850	26
1860	26
1870	26
1880	26
1890	26
1900	26
1910	26
1920	26
1930	26
1940	26
1950	26
1960	26
1970	26
1980	26
1990	26
2000	26
2010	26
2020	26
2030	26
2040	26
2050	26
2060	26
2070	26
2080	26
2090	26
2100	26
2110	26
2120	26
2130	26
2140	26
2150	26
2160	26
2170	26
2180	26
2190	26
2200	26
2210	26
2220	26
2230	26
2240	26
2250	26
2260	26
2270	26
2280	26
2290	26
2300	26
2310	26
2320	26
2330	26
2340	26
2350	26
2360	26
2370	26
2380	26
2390	26
2400	26
2410	26
2420	26
2430	26
2440	26
2450	26
2460	26
2470	26
2480	26
2490	26
2500	26
2510	26
2520	26
2530	26
2540	26
2550	26
2560	26
2570	26
2580	26
2590	26
2600	26
2610	26
2620	26
2630	26
2640	26
2650	26
2660	26
2670	26
2680	26
2690	26
2700	26
2710	26
2720	26
2730	26
2740	26
2750	26
2760	26
2770	26
2780	26
2790	26
2800	26
2810	26
2820	26
2830	26
2840	26
2850	26
2860	26
2870	26
2880	26
2890	26
2900	26
2910	26
2920	26
2930	26
2940	26
2950	26
2960	26
2970	26
2980	26
2990	26
3000	26
3010	26
3020	26
3030	26
3040	26
3050	26
3060	26
3070	26
3080	26
3090	26
3100	26
3110	26
3120	26
3130	26
3140	26
3150	26
3160	26
3170	26
3180	26
3190	26
3200	26
3210	26
3220	26
3230	26
3240	26
3250	26
3260	26
3270	26
3280	26
3290	26
3300	26
3310	26
3320	26
3330	26
3340	26
3350	26
3360	26
3370	26
3380	26
3390	26
3400	26
3410	26
3420	26
3430	26
3440	26
3450	26
3460	26
3470	26
3480	26
3490	26
3500	26
3510	26
3520	26
3530	26
3540	26
3550	26
3560	26
3570	26
3580	26
3590	26
3600	26
3610	26
3620	26
3630	26																									Signal correct
3640	26	-3.36452e-07	-6.00792e-06	-1.13105e-07	-2.01967e-06	2.70256e-06	4.66175e-05	8.80598e-07	1.51898e-05	1.30481e-06	2.24393e-05	4.25837e-07	7.32331e-06	2.93563e-06	5.06165e-05	9.55952e-07	1.64826e-05	1.33853e-06	2.29542e-05	4.38533e-07	7.52028e-06	-3.83616e-07	-6.89684e-06	-1.25999e-07	-2.26527e-06
3650	26	-3.23526e-07	-9.32632e-06	-1.08759e-07	-3.13521e-06	2.72504e-06	7.37318e-05	8.87923e-07	2.40247e-05	1.31904e-06	3.55441e-05	4.30483e-07	1.16002e-05	2.95285e-06	8.00347e-05	9.61558e-07	2.60623e-05	1.35385e-06	3.63958e-05	4.4355e-07	1.19241e-05	-3.66758e-07	-1.0665e-05	-1.20462e-07	-3.50292e-06
3660	26	-3.14481e-07	-1.25101e-05	-1.05719e-07	-4.20549e-06	2.74384e-06	0.000101069	8.94049e-07	3.29323e-05	1.33552e-06	4.88287e-05	4.35862e-07	1.59357e-05	2.9636e-06	0.000109619	9.65059e-07	3.5696e-05	1.36648e-06	5.00066e-05	4.47689e-07	1.63832e-05	-3.47487e-07	-1.42263e-05	-1.14132e-07	-4.67265e-06
3670	26	-3.05345e-07	-1.55972e-05	-1.02647e-07	-5.24329e-06	2.74566e-06	0.000128519	8.94645e-07	4.18765e-05	1.35246e-06	6.22908e-05	4.41387e-07	2.03292e-05	2.96977e-06	0.000139294	9.67067e-07	4.53593e-05	1.37953e-06	6.37537e-05	4.51963e-07	2.08871e-05	-3.31013e-07	-1.75972e-05	-1.08721e-07	-5.77982e-06
3680	26	-2.96437e-07	-1.8608e-05	-9.96526e-08	-6.25543e-06	2.74943e-06	0.000156002	8.95873e-07	5.08317e-05	1.37204e-06	7.59225e-05	4.47779e-07	2.47781e-05	2.98144e-06	0.000169072	9.70869e-07	5.50562e-05	1.38717e-06	7.75634e-05	4.54467e-07	2.54115e-05	-3.15959e-07	-2.08397e-05	-1.03777e-07	-6.84481e-06
3690	26	-2.87342e-07	-2.15223e-05	-9.65953e-08	-7.23511e-06	2.7559e-06	0.000183533	8.97979e-07	5.98021e-05	1.39394e-06	8.97612e-05	4.54927e-07	2.92945e-05	2.99974e-06	0.000198987	9.76827e-07	6.47975e-05	1.38968e-06	9.145e-05	4.55289e-07	2.9961e-05	-3.02529e-07	-2.39263e-05	-9.93658e-08	-7.85861e-06
3700	26	-2.74728e-07	-2.43405e-05	-9.23549e-08	-8.1825e-06	2.76667e-06	0.000211142	9.0149e-07	6.87983e-05	1.41083e-06	0.000103752	4.60439e-07	3.38604e-05	3.02222e-06	0.000229078	9.84149e-07	7.45963e-05	1.39902e-06	0.000105398	4.58349e-07	3.45306e-05	-2.8952e-07	-2.69041e-05	-9.50929e-08	-8.83668e-06
3710	26	-2.58944e-07	-2.70237e-05	-8.70489e-08	-9.0845e-06	2.77927e-06	0.000238855	9.05594e-07	7.78282e-05	1.42234e-06	0.000117903	4.64195e-07	3.84788e-05	3.04922e-06	0.000259411	9.92939e-07	8.4474e-05	1.41436e-06	0.000119451	4.63377e-07	3.91346e-05	-2.77366e-07	-2.97519e-05	-9.11009e-08	-9.77203e-06
3720	26	-2.43025e-07	-2.95403e-05	-8.16972e-08	-9.93052e-06	2.78723e-06	0.000266685	9.08188e-07	8.68963e-05	1.43057e-06	0.000132165	4.66881e-07	4.31334e-05	3.07818e-06	0.000290036	1.00237e-06	9.44466e-05	1.431e-06	0.000133671	4.68827e-07	4.37937e-05	-2.65872e-07	-3.2471e-05	-8.73257e-08	-1.06651e-05
3730	26	-2.39505e-07	-3.19549e-05	-8.05138e-08	-1.07422e-05	2.798e-06	0.000294616	9.11697e-07	9.59974e-05	1.44563e-06	0.000146554	4.71797e-07	4.78295e-05	3.08749e-06	0.000320863	1.0054e-06	0.000104485	1.44814e-06	0.000148074	4.74442e-07	4.85124e-05	-2.40771e-07	-3.499e-05	-7.90814e-08	-1.14925e-05
3740	26	-2.24175e-07	-3.42323e-05	-7.53605e-08	-1.15078e-05	2.80567e-06	0.000322642	9.14197e-07	0.000105129	1.45713e-06	0.00016108	4.75549e-07	5.25702e-05	3.09506e-06	0.000351789	1.00787e-06	0.000114556	1.46016e-06	0.000162628	4.7838e-07	5.32806e-05	-2.18179e-07	-3.72548e-05	-7.16608e-08	-1.22363e-05
3750	26	-2.04175e-07	-3.63857e-05	-6.86373e-08	-1.22317e-05	2.81515e-06	0.000350754	9.17287e-07	0.000114289	1.46871e-06	0.000175713	4.7933e-07	5.73456e-05	3.10386e-06	0.000382783	1.01073e-06	0.000124648	1.47245e-06	0.000177296	4.82406e-07	5.80859e-05	-1.98451e-07	-3.93478e-05	-6.51812e-08	-1.29238e-05
3760	26	-1.88034e-07	-3.83487e-05	-6.3211e-08	-1.28916e-05	2.83399e-06	0.000379004	9.23424e-07	0.000123494	1.48613e-06	0.00019049	4.85014e-07	6.21682e-05	3.11492e-06	0.000413878	1.01433e-06	0.000134774	1.49195e-06	0.000192121	4.88795e-07	6.2943e-05	-1.81248e-07	-4.12477e-05	-5.95311e-08	-1.35478e-05
3770	26	-1.67418e-07	-4.01239e-05	-5.62807e-08	-1.34884e-05	2.84841e-06	0.000407396	9.28123e-07	0.000132745	1.50306e-06	0.000205424	4.90538e-07	6.70423e-05	3.12893e-06	0.000445096	1.0189e-06	0.00014494	1.50696e-06	0.000207096	4.93714e-07	6.7849e-05	-1.58277e-07	-4.29419e-05	-5.19861e-08	-1.41043e-05
3780	26	-1.4416e-07	-4.17121e-05	-4.84622e-08	-1.40223e-05	2.857e-06	0.000435913	9.30923e-07	0.000142037	1.51673e-06	0.000220502	4.95e-07	7.19631e-05	3.14443e-06	0.000476445	1.02394e-06	0.000155148	1.51824e-06	0.000222217	4.9741e-07	7.28032e-05	-1.30994e-07	-4.44192e-05	-4.3025e-08	-1.45895e-05
3790	26	-1.30827e-07	-4.30587e-05	-4.39799e-08	-1.4475e-05	2.86345e-06	0.000464529	9.33024e-07	0.000151362	1.52076e-06	0.000235698	4.96315e-07	7.69224e-05	3.15573e-06	0.00050797	1.02762e-06	0.000165414	1.53624e-06	0.000237528	5.03305e-07	7.78192e-05	-1.09865e-07	-4.55783e-05	-3.60852e-08	-1.49702e-05
3800	26	-1.19086e-07	-4.43211e-05	-4.0033e-08	-1.48994e-05	2.87248e-06	0.000493212	9.35965e-07	0.000160708	1.52523e-06	0.000250927	4.97775e-07	8.18925e-05	3.16504e-06	0.000539561	1.03066e-06	0.000175701	1.54886e-06	0.000252926	5.0744e-07	8.28642e-05	-8.58877e-08	-4.65617e-05	-2.82098e-08	-1.52932e-05
3810	26	-1.08908e-07	-4.54594e-05	-3.66114e-08	-1.5282e-05	2.88318e-06	0.000521991	9.39452e-07	0.000170085	1.53082e-06	0.000266208	4.99597e-07	8.68798e-05	3.17211e-06	0.000571248	1.03296e-06	0.00018602	1.55429e-06	0.000268442	5.09221e-07	8.79476e-05	-6.02361e-08	-4.72907e-05	-1.97846e-08	-1.55326e-05
3820	26	-9.6528e-08	-4.65015e-05	-3.24497e-08	-1.56323e-05	2.886e-06	0.000550826	9.40371e-07	0.00017948	1.53923e-06	0.00028155	5.02342e-07	9.18865e-05	3.18048e-06	0.000603	1.03568e-06	0.00019636	1.55735e-06	0.000283994	5.10222e-07	9.30427e-05	-4.42398e-08	-4.78434e-05	-1.45306e-08	-1.57142e-05
3830	26	-9.10417e-08	-4.74436e-05	-3.06053e-08	-1.59491e-05	2.89266e-06	0.000579731	9.42541e-07	0.000188899	1.55746e-06	0.000297053	5.08293e-07	9.69463e-05	3.19893e-06	0.000634919	1.04169e-06	0.000206753	1.56714e-06	0.000299631	5.1343e-07	9.81656e-05	-3.48798e-08	-4.8235e-05	-1.14563e-08	-1.58428e-05
3840	26	-8.97164e-08	-4.83478e-05	-3.01598e-08	-1.6253e-05	2.90422e-06	0.000608705	9.46307e-07	0.00019834	1.57758e-06	0.000312704	5.1486e-07	0.000102054	3.2204e-06	0.000666991	1.04868e-06	0.000217197	1.57885e-06	0.000315345	5.17265e-07	0.000103314	-2.76204e-08	-4.85559e-05	-9.07192e-09	-1.59482e-05
3850	26	-8.4375e-08	-4.9215e-05	-2.83642e-08	-1.65445e-05	2.91751e-06	0.000637811	9.50637e-07	0.000207824	1.59103e-06	0.000328545	5.19249e-07	0.000107224	3.2355e-06	0.000699266	1.0536e-06	0.000227707	1.58477e-06	0.000331163	5.19205e-07	0.000108496	-2.21701e-08	-4.88057e-05	-7.28178e-09	-1.60302e-05
3860	26	-6.64477e-08	-4.9975e-05	-2.23376e-08	-1.68e-05	2.93466e-06	0.000667067	9.56228e-07	0.000217356	1.60731e-06	0.000344531	5.24562e-07	0.000112441	3.24918e-06	0.000731685	1.05806e-06	0.000238264	1.59344e-06	0.000347051	5.22045e-07	0.000113702	-1.54298e-08	-4.89959e-05	-5.06792e-09	-1.60927e-05
3870	26	-6.18726e-08	-5.06152e-05	-2.07996e-08	-1.70152e-05	2.946e-06	0.000696483	9.59921e-07	0.000226941	1.61825e-06	0.000360672	5.28133e-07	0.000117709	3.2635e-06	0.000764268	1.06272e-06	0.000248874	1.6101e-06	0.000363094	5.27505e-07	0.000118957	4.2148e-09	-4.90213e-05	1.38435e-09	-1.61011e-05
3880	26	-6.14013e-08	-5.12369e-05	-2.06412e-08	-1.72242e-05	2.95572e-06	0.00072599	9.63089e-07	0.000236556	1.6226e-06	0.000376867	5.29552e-07	0.000122994	3.27504e-06	0.000796956	1.06647e-06	0.000259519	1.62121e-06	0.000379241	5.31145e-07	0.000124248	1.93912e-08	-4.88981e-05	6.36904e-09	-1.60606e-05
3890	26	-6.2132e-08	-5.18511e-05	-2.08868e-08	-1.74307e-05	2.96375e-06	0.000755582	9.65707e-07	0.000246198	1.62239e-06	0.000393093	5.29482e-07	0.00012829	3.28595e-06	0.000829762	1.07003e-06	0.000270201	1.62591e-06	0.000395473	5.32683e-07	0.000129565	3.05537e-08	-4.86476e-05	1.00354e-08	-1.59783e-05
3900	26	-5.69276e-08	-5.24288e-05	-1.91372e-08	-1.76249e-05	2.96927e-06	0.000785244	9.67505e-07	0.000255863	1.62415e-06	0.000409332	5.30059e-07	0.00013359	3.30125e-06	0.000862688	1.07501e-06	0.000280923	1.62786e-06	0.00041174	5.33323e-07	0.000134895	4.90871e-08	-4.82161e-05	1.61227e-08	-1.58366e-05
3910	26	-4.93674e-08	-5.29749e-05	-1.65957e-08	-1.78085e-05	2.97516e-06	0.000814971	9.69422e-07	0.00026555	1.62777e-06	0.000425589	5.3124e-07	0.000138895	3.32115e-06	0.000895821	1.08149e-06	0.000291713	1.62971e-06	0.00042803	5.33927e-07	0.000140232	6.99376e-08	-4.76618e-05	2.2971e-08	-1.56545e-05
3920	26	-4.33756e-08	-5.34404e-05	-1.45815e-08	-1.7965e-05	2.98255e-06	0.000844761	9.71832e-07	0.000275256	1.63643e-06	0.000441913	5.34066e-07	0.000144223	3.3425e-06	0.000929137	1.08844e-06	0.000302562	1.63326e-06	0.000444346	5.35091e-07	0.000145577	8.56625e-08	-4.68892e-05	2.81359e-08	-1.54008e-05
3930	26	-3.33174e-08	-5.38162e-05	-1.12003e-08	-1.80913e-05	2.99199e-06	0.00087464	9.74906e-07	0.000284992	1.64743e-06	0.000458335	5.37654e-07	0.000149582	3.36206e-06	0.000962664	1.09481e-06	0.000313479	1.64232e-06	0.000460738	5.38059e-07	0.000150948	9.64374e-08	-4.5984e-05	3.16749e-08	-1.51035e-05
3940	26	-1.98488e-08	-5.40936e-05	-6.67254e-09	-1.81846e-05	3.00244e-06	0.000904613	9.78311e-07	0.000294758	1.65955e-06	0.000474859	5.41612e-07	0.000154975	3.37709e-06	0.000996361	1.09971e-06	0.000324452	1.65782e-06	0.000477241	5.43137e-07	0.000156354	1.04852e-07	-4.49842e-05	3.44386e-08	-1.47751e-05
3950	26	-5.58164e-09	-5.42386e-05	-1.87637e-09	-1.82333e-05	3.00811e-06	0.000934664	9.8016e-07	0.00030455	1.6721e-06	0.000491502	5.45706e-07	0.000160407	3.38529e-06	0.00103017	1.10238e-06	0.000335462	1.66777e-06	0.00049387	5.46397e-07	0.000161802	1.14676e-07	-4.38988e-05	3.76652e-08	-1.44186e-05
3960	26	-6.93643e-09	-5.43046e-05	-2.33181e-09	-1.82555e-05	3.01185e-06	0.000964754	9.8138e-07	0.000314355	1.69028e-06	0.00050836	5.51641e-07	0.000165908	3.39014e-06	0.00106403	1.10396e-06	0.000346489	1.67587e-06	0.000510569	5.49053e-07	0.000167273	1.18189e-07	-4.27257e-05	3.88193e-08	-1.40333e-05
3970	26	-9.90775e-09	-5.43917e-05	-3.33067e-09	-1.82848e-05	3.01633e-06	0.000994901	9.82837e-07	0.000324178	1.70226e-06	0.00052531	5.55551e-07	0.00017144	3.39115e-06	0.00109794	1.10429e-06	0.00035753	1.68814e-06	0.000527407	5.53073e-07	0.00017279	1.2532e-07	-4.15018e-05	4.11615e-08	-1.36313e-05
3980	26	-1.26487e-08	-5.44975e-05	-4.25211e-09	-1.83203e-05	3.01984e-06	0.00102508	9.8398e-07	0.000334011	1.70792e-06	0.000542355	5.57396e-07	0.000177003	3.39961e-06	0.00113191	1.10704e-06	0.000368592	1.70048e-06	0.000544353	5.57113e-07	0.000178342	1.3407e-07	-4.02155e-05	4.40355e-08	-1.32088e-05
3990	26	-8.98006e-09	-5.46014e-05	-3.01881e-09	-1.83553e-05	3.02372e-06	0.0010553	9.85245e-07	0.000343856	1.70999e-06	0.000559444	5.58071e-07	0.00018258	3.41106e-06	0.00116594	1.11077e-06	0.000379675	1.71012e-06	0.000561389	5.60272e-07	0.000183923	1.36918e-07	-3.88597e-05	4.49708e-08	-1.27635e-05
4000	26	-4.03197e-09	-5.46602e-05	-1.35542e-09	-1.8375e-05	3.03038e-06	0.00108556	9.87418e-07	0.000353718	1.70473e-06	0.000576496	5.56357e-07	0.000188145	3.41516e-06	0.00120008	1.11211e-06	0.00039079	1.70948e-06	0.000578487	5.60062e-07	0.000189525	1.42789e-07	-3.74474e-05	4.68989e-08	-1.22996e-05
4010	26	1.37224e-09	-5.46836e-05	4.61304e-10	-1.83829e-05	3.02613e-06	0.00111584	9.86031e-07	0.000363584	1.69509e-06	0.000593514	5.53209e-07	0.000193699	3.43325e-06	0.00123433	1.118e-06	0.000401944	1.71377e-06	0.000595606	5.61468e-07	0.000195133	1.51665e-07	-3.59896e-05	4.98146e-08	-1.18208e-05
4020	26	6.27267e-09	-5.46448e-05	2.10867e-09	-1.83699e-05	3.02837e-06	0.00114612	9.8676e-07	0.000373449	1.69172e-06	0.000610452	5.52111e-07	0.000199227	3.4496e-06	0.00126875	1.12332e-06	0.000413153	1.71589e-06	0.000612755	5.62162e-07	0.000200752	1.68363e-07	-3.43809e-05	5.52988e-08	-1.12924e-05
4030	26	1.36629e-08	-5.45302e-05	4.59305e-09	-1.83313e-05	3.03786e-06	0.00117647	9.89852e-07	0.00038334	1.69788e-06	0.000627424	5.54122e-07	0.000204766	3.46024e-06	0.00130331	1.12678e-06	0.000424405	1.72429e-06	0.00062998	5.64914e-07	0.000206395	1.87878e-07	-3.25704e-05	6.17086e-08	-1.06978e-05
4040	26	2.27113e-08	-5.43744e-05	7.63481e-09	-1.82789e-05	3.05122e-06	0.00120688	9.94207e-07	0.000393248	1.70941e-06	0.000644428	5.57884e-07	0.000210315	3.46743e-06	0.00133792	1.12913e-06	0.000435678	1.73697e-06	0.000647249	5.69071e-07	0.000212053	2.0827e-07	-3.06483e-05	6.84062e-08	-1.00665e-05
4050	26	3.70109e-08	-5.40445e-05	1.24419e-08	-1.8168e-05	3.05891e-06	0.00123744	9.96713e-07	0.000403208	1.72645e-06	0.000661644	5.63444e-07	0.000215934	3.48773e-06	0.00137274	1.13574e-06	0.000447017	1.73838e-06	0.000664627	5.6953e-07	0.000217746	2.11865e-07	-2.85432e-05	6.95872e-08	-9.37502e-06
4060	26	4.71939e-08	-5.36318e-05	1.58651e-08	-1.80293e-05	3.06949e-06	0.0012681	1.00016e-06	0.000413195	1.74243e-06	0.000678989	5.6866e-07	0.000221595	3.50188e-06	0.00140768	1.14034e-06	0.000458393	1.74115e-06	0.00068203	5.70438e-07	0.000223448	2.17933e-07	-2.63854e-05	7.15803e-08	-8.66629e-06
4070	26	5.31756e-08	-5.31443e-05	1.78759e-08	-1.78654e-05	3.08307e-06	0.00129883	1.00459e-06	0.000423208	1.75719e-06	0.000696452	5.73478e-07	0.000227294	3.50959e-06	0.00144272	1.14285e-06	0.000469803	1.74565e-06	0.000699453	5.71912e-07	0.000229156	2.26994e-07	-2.41824e-05	7.45562e-08	-7.94272e-06
4080	26	5.97508e-08	-5.25706e-05	2.00863e-08	-1.76726e-05	3.09602e-06	0.00132974	1.0088e-06	0.000433281	1.75887e-06	0.000714033	5.74026e-07	0.000233032	3.5063e-06	0.00147779	1.14178e-06	0.000481224	1.74749e-06	0.000716921	5.72517e-07	0.000234879	2.37727e-07	-2.18441e-05	7.80815e-08	-7.17469e-06
4090	26	7.2237e-08	-5.19013e-05	2.42838e-08	-1.74476e-05	3.10377e-06	0.00136074	1.01133e-06	0.000443381	1.76086e-06	0.000731633	5.74674e-07	0.000238776	3.50275e-06	0.00151284	1.14063e-06	0.000492636	1.74907e-06	0.000734404	5.73034e-07	0.000240607	2.44174e-07	-1.94361e-05	8.01992e-08	-6.3838e-06
4100	26	8.38202e-08	-5.11264e-05	2.81777e-08	-1.71871e-05	3.10219e-06	0.00139175	1.01082e-06	0.000453488	1.76584e-06	0.000749271	5.76299e-07	0.000244532	3.50453e-06	0.00154788	1.14121e-06	0.000504048	1.75592e-06	0.000751938	5.75277e-07	0.000246351	2.52281e-07	-1.69469e-05	8.28618e-08	-5.56621e-06
4110	26	9.03007e-08	-5.0266e-05	3.03562e-08	-1.68978e-05	3.09259e-06	0.00142275	1.00769e-06	0.000463586	1.7739e-06	0.000766956	5.78929e-07	0.000250304	3.51297e-06	0.00158296	1.14395e-06	0.00051547	1.76947e-06	0.000769545	5.79717e-07	0.00025212	2.64835e-07	-1.4381e-05	8.69851e-08	-4.72346e-06
4120	26	9.41664e-08	-4.93368e-05	3.16558e-08	-1.65855e-05	3.09384e-06	0.00145368	1.00809e-06	0.000473666	1.77722e-06	0.000784718	5.80012e-07	0.000256101	3.51783e-06	0.00161812	1.14554e-06	0.00052692	1.77928e-06	0.000787306	5.82932e-07	0.000257939	2.72175e-07	-1.1683e-05	8.9396e-08	-3.83727e-06
4130	26	1.03581e-07	-4.83238e-05	3.48208e-08	-1.62449e-05	3.09168e-06	0.0014846	1.00739e-06	0.000483739	1.77985e-06	0.000802504	5.80871e-07	0.000261905	3.51364e-06	0.00165325	1.14417e-06	0.000538359	1.7777e-06	0.000805058	5.82414e-07	0.000263755	2.86056e-07	-8.86057e-06	9.39551e-08	-2.91026e-06
4140	26	1.17242e-07	-4.72468e-05	3.94129e-08	-1.58829e-05	3.0869e-06	0.0015155	1.00583e-06	0.000493809	1.78195e-06	0.000820309	5.81557e-07	0.000267716	3.50253e-06	0.00168835	1.14056e-06	0.00054979	1.7674e-06	0.000822804	5.7904e-07	0.000269569	3.0494e-07	-5.94308e-06	1.00158e-07	-1.95201e-06
4150	26	1.29453e-07	-4.59959e-05	4.3518e-08	-1.54624e-05	3.10107e-06	0.00154648	1.01045e-06	0.000503904	1.78091e-06	0.000838118	5.81218e-07	0.000273528	3.50802e-06	0.00172343	1.14234e-06	0.000561213	1.77192e-06	0.000840524	5.8052e-07	0.000275374	3.18817e-07	-2.80804e-06	1.04715e-07	-9.223e-07
4160	26	1.37332e-07	-4.46849e-05	4.61666e-08	-1.50217e-05	3.117e-06	0.00157755	1.01564e-06	0.000514027	1.78314e-06	0.000855952	5.81947e-07	0.000279348	3.52027e-06	0.00175857	1.14633e-06	0.000572657	1.77889e-06	0.000858269	5.82804e-07	0.000281188	3.27912e-07	4.02621e-07	1.07703e-07	1.32241e-07
4170	26	1.36011e-07	-4.33181e-05	4.57227e-08	-1.45622e-05	3.12815e-06	0.00160877	1.01927e-06	0.000524201	1.7943e-06	0.000873838	5.85587e-07	0.000285186	3.54021e-06	0.00179387	1.15282e-06	0.000584152	1.78455e-06	0.000876086	5.84658e-07	0.000287025	3.28442e-07	3.68436e-06	1.07877e-07	1.21013e-06
4180	26	1.45528e-07	-4.18924e-05	4.8922e-08	-1.40829e-05	3.13666e-06	0.0016401	1.02205e-06	0.000534408	1.80193e-06	0.000891817	5.88078e-07	0.000291053	3.55287e-06	0.00182933	1.15695e-06	0.000595699	1.78961e-06	0.000893958	5.86315e-07	0.00029288	3.24452e-07	6.94132e-06	1.06566e-07	2.27988e-06
4190	26	1.59707e-07	-4.03742e-05	5.36884e-08	-1.35725e-05	3.13945e-06	0.00167147	1.02295e-06	0.000544629	1.8064e-06	0.000909853	5.89538e-07	0.00029694	3.56425e-06	0.00186492	1.16065e-06	0.000607286	1.80011e-06	0.000911911	5.89756e-07	0.000298762	3.20764e-07	1.01738e-05	1.05355e-07	3.34158e-06
4200	26	1.73374e-07	-3.87246e-05	5.8283e-08	-1.3018e-05	3.13548e-06	0.00170285	1.02166e-06	0.000554855	1.80798e-06	0.000927923	5.90052e-07	0.000302837	3.57778e-06	0.00190061	1.16506e-06	0.00061891	1.81841e-06	0.000929979	5.95752e-07	0.000304681	3.21406e-07	1.33862e-05	1.05566e-07	4.39669e-06
4210	26	1.7976e-07	-3.69463e-05	6.04295e-08	-1.24202e-05	3.14326e-06	0.00173426	1.0242e-06	0.000565089	1.80991e-06	0.000946017	5.90683e-07	0.000308742	3.58312e-06	0.00193642	1.1668e-06	0.000630572	1.81727e-06	0.000948155	5.95377e-07	0.000310636	3.27235e-07	1.6641e-05	1.07481e-07	5.46573e-06
4220	26	1.86306e-07	-3.51136e-05	6.26302e-08	-1.18041e-05	3.14659e-06	0.0017657	1.02528e-06	0.000575332	1.81162e-06	0.000964124	5.91239e-07	0.000314652	3.58903e-06	0.00197229	1.16872e-06	0.000642251	1.81456e-06	0.000966308	5.9449e-07	0.000316584	3.28305e-07	1.99039e-05	1.07832e-07	6.53746e-06
4230	26	1.93009e-07	-3.32278e-05	6.48837e-08	-1.11701e-05	3.1456e-06	0.00179716	1.02496e-06	0.000585584	1.8131e-06	0.000982245	5.91723e-07	0.000320566	3.5955e-06	0.0020082	1.17083e-06	0.000653945	1.81033e-06	0.00098444	5.93104e-07	0.000322524	3.24735e-07	2.31749e-05	1.06659e-07	7.61181e-06
4240	26	2.03485e-07	-3.12357e-05	6.84051e-08	-1.05005e-05	3.14699e-06	0.00182862	1.02541e-06	0.000595837	1.82256e-06	0.00100044	5.94812e-07	0.000326502	3.59605e-06	0.00204415	1.17101e-06	0.000665653	1.81579e-06	0.00100258	5.94891e-07	0.000328468	3.2473e-07	2.64255e-05	1.06658e-07	8.67945e-06
4250	26	2.00073e-07	-2.92322e-05	6.72583e-08	-9.82693e-06	3.14449e-06	0.00186008	1.0246e-06	0.000606086	1.83487e-06	0.00101872	5.98829e-07	0.00033247	3.59107e-06	0.00208009	1.16939e-06	0.000677354	1.8239e-06	0.00102079	5.9755e-07	0.000334434	3.27674e-07	2.9689e-05	1.07625e-07	9.75136e-06
4260	26	1.86875e-07	-2.72905e-05	6.28215e-08	-9.17422e-06	3.14234e-06	0.00189152	1.0239e-06	0.00061633	1.84573e-06	0.00103712	6.02372e-07	0.000338474	3.5901e-06	0.002116	1.16907e-06	0.000689049	1.83246e-06	0.00103906	6.00353e-07	0.000340419	3.28945e-07	3.29675e-05	1.08042e-07	1.08282e-05
4270	26	1.82081e-07	-2.5438e-05	6.121e-08	-8.55145e-06	3.14748e-06	0.00192296	1.02557e-06	0.000626576	1.85146e-06	0.0010556	6.04243e-07	0.000344506	3.60095e-06	0.00215195	1.1726e-06	0.000700754	1.83348e-06	0.00105738	6.00689e-07	0.000346421	3.27769e-07	3.62589e-05	1.07656e-07	1.19092e-05
4280	26	1.90542e-07	-2.35786e-05	6.40541e-08	-7.92639e-06	3.1514e-06	0.00195446	1.02685e-06	0.000636838	1.85273e-06	0.00107412	6.04657e-07	0.00035055	3.60258e-06	0.00218796	1.17314e-06	0.000712483	1.83218e-06	0.00107571	6.00262e-07	0.000352427	3.46004e-07	3.96197e-05	1.13645e-07	1.30131e-05
4290	26	1.91482e-07	-2.16685e-05	6.43703e-08	-7.28427e-06	3.15356e-06	0.00198598	1.02755e-06	0.000647111	1.86229e-06	0.00109272	6.07778e-07	0.000356621	3.60897e-06	0.00222404	1.17522e-06	0.00072423	1.83738e-06	0.00109408	6.01965e-07	0.000358443	3.46846e-07	4.30806e-05	1.13922e-07	1.41498e-05
4300	26	1.92845e-07	-1.97437e-05	6.48282e-08	-6.63721e-06	3.15554e-06	0.00201753	1.0282e-06	0.00065739	1.86834e-06	0.00111136	6.09753e-07	0.000362702	3.61359e-06	0.00226014	1.17672e-06	0.000735986	1.84106e-06	0.00111246	6.03171e-07	0.000364465	3.48828e-07	4.65676e-05	1.14573e-07	1.52952e-05
4310	26	1.95993e-07	-1.78008e-05	6.58868e-08	-5.98407e-06	3.1575e-06	0.00204909	1.02884e-06	0.000667675	1.86724e-06	0.00113003	6.09394e-07	0.000368798	3.61452e-06	0.00229628	1.17702e-06	0.000747755	1.84131e-06	0.00113087	6.03255e-07	0.000370498	3.55287e-07	5.00858e-05	1.16694e-07	1.64507e-05
4320	26	1.9785e-07	-1.5831e-05	6.65109e-08	-5.32188e-06	3.16308e-06	0.00208071	1.03065e-06	0.000677977	1.86777e-06	0.00114871	6.09567e-07	0.000374894	3.61761e-06	0.00233245	1.17803e-06	0.000759533	1.84945e-06	0.00114935	6.05919e-07	0.000376552	3.64442e-07	5.37038e-05	1.19701e-07	1.7639e-05
4330	26	1.99824e-07	-1.38466e-05	6.71746e-08	-4.65479e-06	3.16991e-06	0.00211235	1.03288e-06	0.000688287	1.86884e-06	0.00116739	6.09913e-07	0.00038099	3.62219e-06	0.00236864	1.17952e-06	0.000771317	1.86034e-06	0.00116786	6.09489e-07	0.000382617	3.7429e-07	5.73635e-05	1.22936e-07	1.88411e-05
4340	26	2.1639e-07	-1.1758e-05	7.27436e-08	-3.95265e-06	3.17405e-06	0.00214408	1.03423e-06	0.000698624	1.86783e-06	0.00118607	6.09584e-07	0.000387088	3.64332e-06	0.00240497	1.1864e-06	0.00078315	1.86579e-06	0.0011865	6.11273e-07	0.000388722	3.76192e-07	6.11168e-05	1.2356e-07	2.00738e-05
4350	26	2.05794e-07	-9.64363e-06	6.91814e-08	-3.24188e-06	3.17523e-06	0.00217582	1.03461e-06	0.000708968	1.87812e-06	0.0012048	6.12945e-07	0.000393199	3.64375e-06	0.00244141	1.18654e-06	0.000795014	1.85355e-06	0.0012051	6.07263e-07	0.000394816	3.87159e-07	6.49289e-05	1.27162e-07	2.13259e-05
4360	26	2.00478e-07	-7.62511e-06	6.73945e-08	-2.56332e-06	3.17986e-06	0.00220761	1.03612e-06	0.000719325	1.88798e-06	0.00122366	6.16161e-07	0.000399353	3.64047e-06	0.00247782	1.18547e-06	0.000806871	1.84912e-06	0.0012236	6.05813e-07	0.000400878	3.99787e-07	6.88967e-05	1.3131e-07	2.26292e-05
4370	26	2.00771e-07	-5.60253e-06	6.74929e-08	-1.88339e-06	3.18831e-06	0.00223946	1.03887e-06	0.000729703	1.8953e-06	0.00124256	6.18549e-07	0.000405522	3.64005e-06	0.00251423	1.18534e-06	0.000818728	1.84333e-06	0.00124206	6.03916e-07	0.000406926	4.12162e-07	7.2949e-05	1.35375e-07	2.39601e-05
4380	26	2.08589e-07	-3.56645e-06	7.0121e-08	-1.19893e-06	3.20207e-06	0.00227139	1.04336e-06	0.000740108	1.89904e-06	0.00126153	6.19772e-07	0.000411712	3.6439e-06	0.00255065	1.18659e-06	0.000830586	1.83475e-06	0.00126046	6.01104e-07	0.000412955	4.24143e-07	7.71141e-05	1.3931e-07	2.53281e-05
4390	26	2.29077e-07	-1.36764e-06	7.70085e-08	-4.59757e-07	3.20943e-06	0.00230345	1.04576e-06	0.000750553	1.90248e-06	0.00128054	6.20895e-07	0.000417916	3.6558e-06	0.00258715	1.19046e-06	0.000842474	1.84526e-06	0.00127887	6.04547e-07	0.000418987	4.37392e-07	8.14261e-05	1.43662e-07	2.67444e-05
4400	26	2.37585e-07	9.68168e-07	7.98686e-08	3.25467e-07	3.21234e-06	0.00233556	1.04671e-06	0.000761015	1.90793e-06	0.00129959	6.22673e-07	0.000424134	3.67096e-06	0.00262379	1.1954e-06	0.000854404	1.85177e-06	0.00129736	6.0668e-07	0.000425043	4.51296e-07	8.58728e-05	1.48228e-07	2.82049e-05
4410	26	2.46217e-07	3.40398e-06	8.27703e-08	1.14431e-06	3.21335e-06	0.00236768	1.04703e-06	0.000771484	1.90544e-06	0.00131864	6.21859e-07	0.000430352	3.66943e-06	0.00266047	1.19491e-06	0.000866348	1.8597e-06	0.00131593	6.09278e-07	0.000431128	4.54191e-07	9.03911e-05	1.49179e-07	2.9689e-05
4420	26	2.53644e-07	5.89566e-06	8.5267e-08	1.98193e-06	3.21586e-06	0.00239983	1.04785e-06	0.00078196	1.90355e-06	0.0013377	6.21243e-07	0.000436571	3.66042e-06	0.00269712	1.19197e-06	0.000878284	1.86718e-06	0.00133456	6.11728e-07	0.000437231	4.51321e-07	9.49179e-05	1.48236e-07	3.11758e-05
4430	26	2.55625e-07	8.43752e-06	8.59329e-08	2.83643e-06	3.22315e-06	0.00243202	1.05023e-06	0.000792447	1.91137e-06	0.00135676	6.23793e-07	0.000442793	3.65106e-06	0.00273369	1.18892e-06	0.000890193	1.87096e-06	0.00135324	6.12968e-07	0.000443352	4.46154e-07	9.94129e-05	1.46539e-07	3.26522e-05
4440	26	2.51338e-07	1.0966e-05	8.4492e-08	3.68642e-06	3.2218e-06	0.00246424	1.04979e-06	0.000802945	1.92035e-06	0.00137593	6.26726e-07	0.000449048	3.65027e-06	0.0027702	1.18866e-06	0.000902082	1.88121e-06	0.00137202	6.16327e-07	0.000449503	4.3894e-07	0.000103831	1.4417e-07	3.41035e-05
4450	26	2.45432e-07	1.34493e-05	8.25065e-08	4.52122e-06	3.22295e-06	0.00249647	1.05016e-06	0.000813446	1.92597e-06	0.00139515	6.28559e-07	0.000455323	3.65753e-06	0.00280675	1.19103e-06	0.000913983	1.89421e-06	0.0013909	6.20585e-07	0.000455688	4.37437e-07	0.00010822	1.43676e-07	3.5545e-05
4460	26	2.45468e-07	1.59231e-05	8.25185e-08	5.35284e-06	3.22676e-06	0.00252871	1.05141e-06	0.000823953	1.93045e-06	0.00141444	6.30022e-07	0.000461618	3.66757e-06	0.00284337	1.1943e-06	0.000925908	1.90012e-06	0.00140985	6.22521e-07	0.000461896	4.40587e-07	0.000112608	1.44711e-07	3.69861e-05
4470	26	2.59092e-07	1.84524e-05	8.70986e-08	6.20311e-06	3.22828e-06	0.00256099	1.0519e-06	0.00083447	1.93801e-06	0.00143379	6.3249e-07	0.000467931	3.67254e-06	0.00288007	1.19592e-06	0.00093786	1.88921e-06	0.00142879	6.18948e-07	0.000468102	4.44564e-07	0.000117039	1.46017e-07	3.84416e-05
4480	26	2.74632e-07	2.11276e-05	9.23225e-08	7.10243e-06	3.23358e-06	0.00259331	1.05363e-06	0.000845001	1.94146e-06	0.00145318	6.33616e-07	0.000474259	3.67361e-06	0.0029168	1.19626e-06	0.000949818	1.88851e-06	0.0014477	6.18716e-07	0.000474297	4.53942e-07	0.000121539	1.49097e-07	3.99196e-05
4490	26	2.87999e-07	2.3924e-05	9.6816e-08	8.0425e-06	3.24202e-06	0.00262568	1.05638e-06	0.00085555	1.94275e-06	0.0014726	6.34035e-07	0.000480598	3.67495e-06	0.00295355	1.1967e-06	0.000961786	1.89372e-06	0.00146661	6.20425e-07	0.000480492	4.67303e-07	0.000126159	1.53486e-07	4.14369e-05
4500	26	2.91759e-07	2.6822e-05	9.80803e-08	9.01669e-06	3.25272e-06	0.00265817	1.05986e-06	0.000866134	1.94494e-06	0.00149204	6.34752e-07	0.000486942	3.68394e-06	0.00299035	1.19963e-06	0.00097377	1.89838e-06	0.00148557	6.21951e-07	0.000486705	4.81776e-07	0.00013087	1.5824e-07	4.29844e-05
4510	26	2.97983e-07	2.97793e-05	1.00172e-07	1.00108e-05	3.25833e-06	0.0026907	1.06169e-06	0.000876736	1.94763e-06	0.0015115	6.35629e-07	0.000493294	3.69174e-06	0.00302722	1.20217e-06	0.000985777	1.90355e-06	0.00150458	6.23644e-07	0.000492933	4.85658e-07	0.000135713	1.59514e-07	4.45748e-05
4520	26	3.07904e-07	3.27842e-05	1.03508e-07	1.1021e-05	3.2585e-06	0.00272329	1.06175e-06	0.000887353	1.9507e-06	0.00153099	6.3663e-07	0.000499653	3.69738e-06	0.00306415	1.20401e-06	0.000997803	1.9093e-06	0.00152363	6.25528e-07	0.000499174	4.96809e-07	0.000140633	1.63177e-07	4.6191e-05
4530	26	3.06518e-07	3.58506e-05	1.03042e-07	1.20518e-05	3.27278e-06	0.00275598	1.0664e-06	0.000898006	1.95242e-06	0.00155051	6.37192e-07	0.000506023	3.69425e-06	0.0031011	1.20299e-06	0.00100984	1.91087e-06	0.00154273	6.26042e-07	0.000505433	5.07973e-07	0.000145651	1.66844e-07	4.78391e-05
4540	26	3.09704e-07	3.89431e-05	1.04113e-07	1.30914e-05	3.28575e-06	0.00278876	1.07063e-06	0.000908688	1.95293e-06	0.00157003	6.3736e-07	0.000512395	3.68794e-06	0.00313801	1.20093e-06	0.00102185	1.9106e-06	0.00156184	6.25955e-07	0.000511692	5.12059e-07	0.000150751	1.68186e-07	4.95141e-05
4550	26	3.19328e-07	4.20706e-05	1.07348e-07	1.41428e-05	3.29555e-06	0.00282165	1.07382e-06	0.000919403	1.95237e-06	0.00158956	6.37174e-07	0.000518768	3.67861e-06	0.00317486	1.19789e-06	0.00103385	1.90923e-06	0.00158094	6.25504e-07	0.00051795	5.17825e-07	0.000155911	1.7008e-07	5.12091e-05
4560	26	3.39751e-07	4.53918e-05	1.14214e-07	1.52593e-05	3.28639e-06	0.00285455	1.07084e-06	0.000930122	1.95654e-06	0.00160911	6.38537e-07	0.000525148	3.67486e-06	0.00321162	1.19667e-06	0.00104582	1.9245e-06	0.00160013	6.30508e-07	0.000524237	5.245e-07	0.000161113	1.72272e-07	5.29175e-05
4570	26	3.51582e-07	4.88549e-05	1.18191e-07	1.64235e-05	3.28554e-06	0.00288741	1.07056e-06	0.00094083	1.95476e-06	0.00162866	6.37956e-07	0.00053153	3.67876e-06	0.0032484	1.19794e-06	0.0010578	1.93309e-06	0.00161942	6.33322e-07	0.000530557	5.31066e-07	0.000166394	1.74429e-07	5.46521e-05
4580	26	3.6026e-07	5.24078e-05	1.21108e-07	1.76178e-05	3.28715e-06	0.00292027	1.07108e-06	0.000951538	1.95337e-06	0.0016482	6.37503e-07	0.000537908	3.68345e-06	0.0032852	1.19947e-06	0.00106979	1.94969e-06	0.00163884	6.38762e-07	0.000536919	5.38019e-07	0.000171731	1.76712e-07	5.64052e-05
4590	26	3.65227e-07	5.60303e-05	1.22778e-07	1.88356e-05	3.29388e-06	0.00295319	1.07327e-06	0.000962264	1.95735e-06	0.00166776	6.38801e-07	0.000544291	3.68843e-06	0.00332206	1.20109e-06	0.00108179	1.96562e-06	0.0016584	6.4398e-07	0.000543327	5.45301e-07	0.000177148	1.79104e-07	5.81844e-05
4600	26	3.64662e-07	5.96788e-05	1.22588e-07	2.00621e-05	3.30778e-06	0.0029862	1.07781e-06	0.000973021	1.96757e-06	0.00168738	6.42138e-07	0.000550693	3.69702e-06	0.00335899	1.20389e-06	0.00109381	1.96311e-06	0.00167804	6.43159e-07	0.000549764	5.52731e-07	0.000182637	1.81545e-07	5.99872e-05
4610	26	3.61932e-07	6.33091e-05	1.2167e-07	2.12825e-05	3.30671e-06	0.00301926	1.07746e-06	0.000983791	1.97349e-06	0.00170709	6.44069e-07	0.000557126	3.71146e-06	0.00339605	1.20859e-06	0.00110588	1.96729e-06	0.0016977	6.44527e-07	0.000556204	5.63986e-07	0.000188232	1.85241e-07	6.18248e-05
4620	26	3.62007e-07	6.69341e-05	1.21695e-07	2.25011e-05	3.29935e-06	0.00305229	1.07506e-06	0.000994555	1.97783e-06	0.00172685	6.45484e-07	0.000563574	3.71773e-06	0.00343318	1.21063e-06	0.00111797	1.97241e-06	0.00171741	6.46204e-07	0.000562659	5.66918e-07	0.000193874	1.86204e-07	6.36779e-05
4630	26	3.64119e-07	7.05654e-05	1.22405e-07	2.37219e-05	3.2925e-06	0.00308525	1.07283e-06	0.00100529	1.98239e-06	0.00174665	6.46972e-07	0.000570037	3.72018e-06	0.00347037	1.21143e-06	0.00113008	1.97783e-06	0.00173715	6.47982e-07	0.000569129	5.64851e-07	0.000199532	1.85525e-07	6.55363e-05
4640	26	3.68481e-07	7.42347e-05	1.23872e-07	2.49553e-05	3.28973e-06	0.00311816	1.07192e-06	0.00101602	1.99143e-06	0.00176653	6.49923e-07	0.000576526	3.72488e-06	0.00350761	1.21296e-06	0.00114221	1.98246e-06	0.00175696	6.49496e-07	0.000575618	5.60485e-07	0.000205152	1.84092e-07	6.73823e-05
4650	26	3.77106e-07	7.79712e-05	1.26771e-07	2.62115e-05	3.29056e-06	0.00315107	1.07219e-06	0.00102674	1.9997e-06	0.00178647	6.52623e-07	0.000583034	3.7276e-06	0.00354486	1.21385e-06	0.00115434	1.98142e-06	0.00177675	6.49157e-07	0.000582104	5.56929e-07	0.000210748	1.82923e-07	6.92201e-05
4660	26	3.92389e-07	8.18124e-05	1.31909e-07	2.75027e-05	3.29823e-06	0.00318401	1.07469e-06	0.00103747	2.00566e-06	0.0018065	6.54569e-07	0.000589569	3.72648e-06	0.00358213	1.21348e-06	0.00116647	1.97105e-06	0.00179652	6.4576e-07	0.00058858	5.55249e-07	0.000216309	1.82372e-07	7.10468e-05
4670	26	3.96042e-07	8.57392e-05	1.33137e-07	2.88228e-05	3.30805e-06	0.00321706	1.07789e-06	0.00104824	2.00937e-06	0.00182657	6.55778e-07	0.000596119	3.72785e-06	0.0036194	1.21393e-06	0.00117861	1.96003e-06	0.00181618	6.4215e-07	0.00059502	5.62814e-07	0.000221907	1.84856e-07	7.28856e-05
4680	26	3.94344e-07	8.96892e-05	1.32566e-07	3.01507e-05	3.31507e-06	0.00325016	1.08018e-06	0.00105903	2.0082e-06	0.00184665	6.55397e-07	0.000602673	3.7265e-06	0.00365667	1.21349e-06	0.00119075	1.95355e-06	0.00183575	6.40024e-07	0.000601432	5.74443e-07	0.000227602	1.88676e-07	7.47561e-05
4690	26	3.92323e-07	9.36259e-05	1.31886e-07	3.1474e-05	3.31255e-06	0.0032833	1.07936e-06	0.00106983	2.005e-06	0.00186673	6.54353e-07	0.000609225	3.72418e-06	0.00369393	1.21273e-06	0.00120288	1.95136e-06	0.00185528	6.39307e-07	0.00060783	5.86702e-07	0.000233391	1.92702e-07	7.66575e-05
4700	26	3.91738e-07	9.75474e-05	1.3169e-07	3.27923e-05	3.31728e-06	0.00331646	1.0809e-06	0.00108063	2.00755e-06	0.00188679	6.55183e-07	0.000615773	3.73201e-06	0.00373121	1.21528e-06	0.00121502	1.95173e-06	0.0018748	6.3943e-07	0.000614224	5.99915e-07	0.000239328	1.97042e-07	7.86075e-05
4710	26	3.97033e-07	0.000101502	1.3347e-07	3.41218e-05	3.32429e-06	0.00334966	1.08318e-06	0.00109145	2.00866e-06	0.00190687	6.55547e-07	0.000622327	3.73774e-06	0.00376857	1.21715e-06	0.00122719	1.95741e-06	0.00189435	6.41292e-07	0.000620631	6.03307e-07	0.000245346	1.98156e-07	8.05841e-05
4720	26	4.02331e-07	0.000105494	1.35251e-07	3.54636e-05	3.32933e-06	0.00338292	1.08483e-06	0.00110229	2.00985e-06	0.00192696	6.55935e-07	0.000628884	3.74426e-06	0.00380598	1.21927e-06	0.00123937	1.95962e-06	0.00191393	6.42014e-07	0.000627044	6.08273e-07	0.000251409	1.99787e-07	8.25754e-05
4730	26	4.06296e-07	0.000109536	1.36584e-07	3.68224e-05	3.31849e-06	0.00341613	1.08129e-06	0.00111311	2.01107e-06	0.00194707	6.56335e-07	0.000635445	3.75065e-06	0.00384345	1.22135e-06	0.00125157	1.95782e-06	0.00193352	6.41425e-07	0.000633463	6.16093e-07	0.000257526	2.02356e-07	8.45846e-05
4740	26	4.09336e-07	0.000113618	1.37606e-07	3.81946e-05	3.31366e-06	0.00344932	1.07972e-06	0.00112392	2.01054e-06	0.00196717	6.5616e-07	0.000642007	3.74882e-06	0.00388094	1.22076e-06	0.00126378	1.96491e-06	0.00195315	6.43747e-07	0.000639894	6.17754e-07	0.000263693	2.02902e-07	8.661e-05
4750	26	4.11313e-07	0.000117715	1.3827e-07	3.95721e-05	3.319e-06	0.00348248	1.08146e-06	0.00113473	2.00923e-06	0.00198727	6.55732e-07	0.000648566	3.74566e-06	0.00391841	1.21973e-06	0.00127598	1.97063e-06	0.00197281	6.4562e-07	0.000646335	6.17425e-07	0.000269867	2.02793e-07	8.86379e-05
4760	26	4.11431e-07	0.000121828	1.3831e-07	4.09548e-05	3.31727e-06	0.00351565	1.0809e-06	0.00114554	2.00718e-06	0.00200735	6.55064e-07	0.00065512	3.74375e-06	0.00395586	1.2191e-06	0.00128818	1.96879e-06	0.0019925	6.4502e-07	0.000652787	6.16102e-07	0.000276035	2.02359e-07	9.06638e-05
4770	26	4.11024e-07	0.00012594	1.38173e-07	4.23369e-05	3.31668e-06	0.00354882	1.0807e-06	0.00115635	2.00781e-06	0.00202744	6.55269e-07	0.000661674	3.7412e-06	0.00399328	1.21827e-06	0.00130036	1.96087e-06	0.00201214	6.42424e-07	0.00065922	6.21701e-07	0.00028224	2.04198e-07	9.27019e-05
4780	26	4.10112e-07	0.000130045	1.37867e-07	4.3717e-05	3.32154e-06	0.00358202	1.08229e-06	0.00116716	2.00987e-06	0.00204752	6.5594e-07	0.00066823	3.738e-06	0.00403068	1.21723e-06	0.00131254	1.95286e-06	0.00203171	6.39801e-07	0.000665633	6.2881e-07	0.000288486	2.06533e-07	9.47535e-05
4790	26	4.08463e-07	0.00013414	1.37312e-07	4.50935e-05	3.33145e-06	0.00361527	1.08552e-06	0.001178	2.01129e-06	0.00206763	6.56405e-07	0.000674791	3.7344e-06	0.00406805	1.21606e-06	0.00132471	1.95232e-06	0.00205124	6.39622e-07	0.000672031	6.29246e-07	0.000294775	2.06676e-07	9.68188e-05
4800	26	4.14616e-07	0.00013828	1.39381e-07	4.64853e-05	3.32267e-06	0.00364853	1.08265e-06	0.00118883	2.00545e-06	0.0020877	6.54499e-07	0.000681343	3.74731e-06	0.00410547	1.22027e-06	0.00133689	1.95564e-06	0.00207079	6.4071e-07	0.000678436	6.26117e-07	0.000301049	2.05648e-07	9.88797e-05
4810	26	4.23031e-07	0.000142439	1.4221e-07	4.78836e-05	3.31052e-06	0.0036817	1.0787e-06	0.00119964	2.00911e-06	0.00210778	6.55695e-07	0.000687896	3.76003e-06	0.004143	1.22441e-06	0.00134912	1.95988e-06	0.00209036	6.42099e-07	0.000684846	6.20328e-07	0.000307281	2.03747e-07	0.000100927
4820	26	4.2865e-07	0.000146719	1.44099e-07	4.93222e-05	3.30565e-06	0.00371478	1.07711e-06	0.00121042	2.02098e-06	0.00212794	6.59567e-07	0.000694475	3.76373e-06	0.00418062	1.22561e-06	0.00136137	1.96896e-06	0.00211004	6.45074e-07	0.000691294	6.18203e-07	0.000313477	2.03049e-07	0.000102962
4830	26	4.35129e-07	0.000151023	1.46277e-07	5.0769e-05	3.3068e-06	0.00374784	1.07749e-06	0.00122119	2.03089e-06	0.00214819	6.62801e-07	0.000701082	3.7644e-06	0.00421826	1.22583e-06	0.00137362	1.97503e-06	0.00212972	6.47064e-07	0.000697744	6.23226e-07	0.000319686	2.04699e-07	0.000105001
4840	26	4.44303e-07	0.000155428	1.4936e-07	5.22499e-05	3.31014e-06	0.00378093	1.07857e-06	0.00123197	2.03359e-06	0.00216851	6.63683e-07	0.000707716	3.77399e-06	0.00425596	1.22895e-06	0.0013859	1.96962e-06	0.00214944	6.4529e-07	0.000704204	6.34974e-07	0.000325986	2.08558e-07	0.00010707
4850	26	4.47861e-07	0.000159885	1.50557e-07	5.37484e-05	3.31395e-06	0.00381405	1.07981e-06	0.00124277	2.03861e-06	0.00218888	6.6532e-07	0.000714362	3.78221e-06	0.00429375	1.23163e-06	0.0013982	1.96709e-06	0.00216913	6.4446e-07	0.000710653	6.35014e-07	0.000332327	2.08571e-07	0.000109153
4860	26	4.49244e-07	0.00016437	1.51022e-07	5.5256e-05	3.31608e-06	0.0038472	1.08051e-06	0.00125357	2.03722e-06	0.00220923	6.64866e-07	0.000721006	3.78739e-06	0.00433159	1.23332e-06	0.00141053	1.97222e-06	0.00218884	6.46143e-07	0.000717112	6.35848e-07	0.000338695	2.08844e-07	0.000111245
4870	26	4.50299e-07	0.000168868	1.51376e-07	5.6768e-05	3.31673e-06	0.00388036	1.08072e-06	0.00126437	2.02426e-06	0.00222954	6.60639e-07	0.000727634	3.78856e-06	0.00436947	1.2337e-06	0.00142286	1.98643e-06	0.00220863	6.50799e-07	0.000723596	6.44598e-07	0.000345096	2.11719e-07	0.000113347
4880	26	4.50094e-07	0.000173369	1.51307e-07	5.82812e-05	3.32494e-06	0.00391356	1.0834e-06	0.00127519	2.00784e-06	0.00224972	6.5528e-07	0.00073422	3.78845e-06	0.00440735	1.23366e-06	0.0014352	1.99497e-06	0.00222852	6.53595e-07	0.000730113	6.54971e-07	0.000351583	2.15125e-07	0.000115478
4890	26	4.46903e-07	0.000177853	1.50235e-07	5.97884e-05	3.31378e-06	0.00394675	1.07976e-06	0.001286	2.00712e-06	0.0022698	6.55043e-07	0.000740772	3.79012e-06	0.00444524	1.2342e-06	0.00144754	1.99747e-06	0.00224849	6.54416e-07	0.000736654	6.71121e-07	0.000358221	2.2043e-07	0.000117658
4900	26	4.50125e-07	0.000182345	1.51318e-07	6.12985e-05	3.31386e-06	0.0039799	1.07978e-06	0.00129681	2.00998e-06	0.00228989	6.55978e-07	0.000747328	3.78591e-06	0.00448312	1.23284e-06	0.00145987	1.99316e-06	0.00226843	6.53003e-07	0.000743188	6.82001e-07	0.00036499	2.24004e-07	0.000119881
4910	26	4.48688e-07	0.000186822	1.50835e-07	6.28036e-05	3.31773e-06	0.00401305	1.08105e-06	0.00130761	2.01107e-06	0.00230999	6.56335e-07	0.000753888	3.78178e-06	0.00452096	1.23149e-06	0.00147219	1.98611e-06	0.00228833	6.50694e-07	0.000749706	6.89189e-07	0.000371846	2.26364e-07	0.000122133
4920	26	4.3764e-07	0.000191274	1.47121e-07	6.43003e-05	3.31857e-06	0.00404623	1.08132e-06	0.00131842	2.00957e-06	0.0023301	6.55843e-07	0.00076045	3.78103e-06	0.00455878	1.23124e-06	0.00148451	1.97872e-06	0.00230817	6.48271e-07	0.000756205	6.94873e-07	0.000378755	2.28231e-07	0.000124402
4930	26	4.4454e-07	0.000195705	1.4944e-07	6.57898e-05	3.30851e-06	0.00407934	1.07804e-06	0.00132921	2.00249e-06	0.00235014	6.53534e-07	0.000766992	3.78096e-06	0.00459659	1.23122e-06	0.00149682	1.98144e-06	0.00232797	6.49161e-07	0.000762695	7.02096e-07	0.000385756	2.30604e-07	0.000126702
4940	26	4.45086e-07	0.00020014	1.49624e-07	6.72807e-05	3.30635e-06	0.00411243	1.07734e-06	0.00133999	1.99557e-06	0.00237014	6.51275e-07	0.000773518	3.77828e-06	0.00463438	1.23035e-06	0.00150913	1.98263e-06	0.00234779	6.49552e-07	0.000769187	7.04885e-07	0.00039278	2.3152e-07	0.000129009
4950	26	4.39661e-07	0.000204566	1.478e-07	6.87686e-05	3.31125e-06	0.00414552	1.07893e-06	0.00135077	1.99204e-06	0.00239008	6.50121e-07	0.000780026	3.77666e-06	0.00467216	1.22982e-06	0.00152143	1.98406e-06	0.00236763	6.50023e-07	0.000775687	7.0306e-07	0.00039982	2.3092e-07	0.000131321
4960	26	4.40041e-07	0.000208965	1.47928e-07	7.02473e-05	3.31001e-06	0.00417862	1.07853e-06	0.00136156	1.99328e-06	0.00241	6.50528e-07	0.000786529	3.78176e-06	0.00470995	1.23148e-06	0.00153374	1.98978e-06	0.0023875	6.51894e-07	0.000782197	7.01786e-07	0.000406842	2.30502e-07	0.000133627
4970	26	4.40354e-07	0.000213366	1.48033e-07	7.1727e-05	3.30883e-06	0.00421172	1.07815e-06	0.00137234	1.99307e-06	0.00242993	6.50459e-07	0.000793034	3.79221e-06	0.00474782	1.23488e-06	0.00154607	1.98783e-06	0.00240738	6.51257e-07	0.000788709	6.93609e-07	0.00041381	2.27816e-07	0.000135916
4980	26	4.44269e-07	0.000217797	1.49349e-07	7.32163e-05	3.31067e-06	0.00424482	1.07875e-06	0.00138313	1.99156e-06	0.00244986	6.49967e-07	0.000799536	3.7883e-06	0.0047857	1.23361e-06	0.0015584	1.984e-06	0.00242724	6.50003e-07	0.000795218	6.81881e-07	0.000420695	2.23964e-07	0.000138177
4990	26	4.53714e-07	0.000222281	1.52524e-07	7.47237e-05	3.31673e-06	0.00427795	1.08072e-06	0.00139392	1.98929e-06	0.00246976	6.49224e-07	0.000806032	3.78274e-06	0.00482356	1.2318e-06	0.00157073	1.98218e-06	0.00244707	6.49406e-07	0.000801715	6.69667e-07	0.000427459	2.19952e-07	0.000140399
5000	26	4.52897e-07	0.000226808	1.5225e-07	7.62458e-05	3.31369e-06	0.0043111	1.07973e-06	0.00140472	1.99074e-06	0.00248967	6.49699e-07	0.000812528	3.77701e-06	0.00486136	1.22993e-06	0.00158304	1.97961e-06	0.00246688	6.48564e-07	0.000808204	6.66684e-07	0.000434143	2.18973e-07	0.000142594
5010	26	4.46031e-07	0.000231297	1.49941e-07	7.77546e-05	3.31235e-06	0.00434424	1.07929e-06	0.00141552	1.995e-06	0.0025096	6.51087e-07	0.000819033	3.77445e-06	0.00489912	1.2291e-06	0.00159534	1.98025e-06	0.00248669	6.48773e-07	0.000814693	6.66147e-07	0.000440809	2.18796e-07	0.000144784
5020	26	4.39507e-07	0.000235744	1.47748e-07	7.92496e-05	3.31382e-06	0.00437737	1.07977e-06	0.00142632	2.00052e-06	0.00252957	6.52891e-07	0.00082555	3.77684e-06	0.00493689	1.22988e-06	0.00160763	1.9818e-06	0.00250649	6.49282e-07	0.00082118	6.6623e-07	0.00044747	2.18824e-07	0.000146972
5030	26	4.49626e-07	0.000240196	1.5115e-07	8.07464e-05	3.31487e-06	0.00441051	1.08011e-06	0.00143712	2.00328e-06	0.00254959	6.5379e-07	0.000832084	3.78709e-06	0.00497471	1.23322e-06	0.00161995	1.9752e-06	0.00252627	6.47119e-07	0.000827661	6.65412e-07	0.000454127	2.18555e-07	0.000149158
5040	26	4.53014e-07	0.0002447	1.52289e-07	8.22604e-05	3.31385e-06	0.00444365	1.07978e-06	0.00144791	2.00716e-06	0.00256964	6.55058e-07	0.000838629	3.79678e-06	0.00501264	1.23637e-06	0.0016323	1.9731e-06	0.00254602	6.4643e-07	0.000834131	6.68895e-07	0.000460812	2.19699e-07	0.000151354
5050	26	4.50288e-07	0.000249207	1.51372e-07	8.37756e-05	3.31113e-06	0.00447678	1.0789e-06	0.00145871	2.01446e-06	0.00258975	6.5744e-07	0.000845192	3.80429e-06	0.00505063	1.23882e-06	0.00164468	1.97912e-06	0.0025658	6.48403e-07	0.000840612	6.74147e-07	0.000467519	2.21424e-07	0.000153557
5060	26	4.43484e-07	0.000253678	1.49085e-07	8.52786e-05	3.30968e-06	0.00450988	1.07842e-06	0.0014695	2.02384e-06	0.00260994	6.60499e-07	0.000851779	3.80099e-06	0.00508866	1.23774e-06	0.00165706	1.99422e-06	0.00258566	6.53351e-07	0.000847119	6.76622e-07	0.000474269	2.22237e-07	0.000155774
5070	26	4.41328e-07	0.00025811	1.4836e-07	8.67685e-05	3.31399e-06	0.004543	1.07983e-06	0.00148029	2.02351e-06	0.00263017	6.60393e-07	0.000858383	3.79589e-06	0.00512664	1.23608e-06	0.00166942	1.9977e-06	0.0026056	6.5449e-07	0.00085365	6.78869e-07	0.00048105	2.22975e-07	0.000158001
5080	26	4.41774e-07	0.000262526	1.4851e-07	8.82531e-05	3.30523e-06	0.00457609	1.07697e-06	0.00149107	2.02317e-06	0.0026504	6.60283e-07	0.000864986	3.7947e-06	0.0051646	1.2357e-06	0.00168179	1.99672e-06	0.00262557	6.5417e-07	0.000860195	6.81252e-07	0.000487851	2.23758e-07	0.000160235
5090	26	4.45207e-07	0.000266963	1.49665e-07	8.97446e-05	3.30601e-06	0.00460915	1.07723e-06	0.00150184	2.02174e-06	0.00267063	6.59815e-07	0.000871587	3.79863e-06	0.00520256	1.23697e-06	0.00169415	2.003e-06	0.00264558	6.56226e-07	0.000866749	6.8371e-07	0.000494672	2.24565e-07	0.000162475
5100	26	4.49803e-07	0.000271437	1.51209e-07	9.12485e-05	3.31192e-06	0.00464224	1.07915e-06	0.00151262	2.02338e-06	0.00269086	6.6035e-07	0.000878189	3.80228e-06	0.00524057	1.23816e-06	0.00170652	2.01243e-06	0.00266565	6.59315e-07	0.000873326	6.87293e-07	0.00050153	2.25742e-07	0.000164728
5110	26	4.53903e-07	0.000275952	1.52588e-07	9.27663e-05	3.31673e-06	0.00467537	1.08072e-06	0.00152342	2.02911e-06	0.00271112	6.62222e-07	0.000884801	3.80846e-06	0.00527862	1.24018e-06	0.00171892	2.02083e-06	0.00268581	6.62066e-07	0.00087993	6.86815e-07	0.000508399	2.25585e-07	0.000166984
5120	26	4.56268e-07	0.000280504	1.53383e-07	9.42964e-05	3.31232e-06	0.00470852	1.07928e-06	0.00153422	2.03546e-06	0.00273144	6.64292e-07	0.000891434	3.81136e-06	0.00531672	1.24112e-06	0.00173132	2.02352e-06	0.00270603	6.62948e-07	0.000886555	6.87473e-07	0.000515274	2.25801e-07	0.000169242
5130	26	4.58773e-07	0.000285082	1.54225e-07	9.58355e-05	3.30206e-06	0.00474157	1.07594e-06	0.00154499	2.03835e-06	0.00275181	6.65236e-07	0.000898082	3.81099e-06	0.00535483	1.241e-06	0.00174373	2.01611e-06	0.00272621	6.60521e-07	0.000893167	6.93516e-07	0.000522181	2.27786e-07	0.000171511
5140	26	4.62236e-07	0.00028969	1.55389e-07	9.73847e-05	3.29524e-06	0.00477458	1.07372e-06	0.00155574	2.03822e-06	0.00277219	6.65194e-07	0.000904731	3.81266e-06	0.00539295	1.24154e-06	0.00175615	2.01057e-06	0.00274637	6.58705e-07	0.00089977	7.07297e-07	0.000529197	2.32312e-07	0.000173815
5150	26	4.67405e-07	0.000294341	1.57127e-07	9.89483e-05	3.29737e-06	0.00480754	1.07441e-06	0.00156649	2.03405e-06	0.00279255	6.63833e-07	0.000911375	3.80939e-06	0.00543106	1.24048e-06	0.00176856	2.01294e-06	0.00276649	6.59483e-07	0.000906361	7.08923e-07	0.00053627	2.32846e-07	0.000176138
5160	26	4.7082e-07	0.000299024	1.58275e-07	0.000100523	3.29655e-06	0.00484051	1.07414e-06	0.00157723	2.02939e-06	0.00281287	6.62313e-07	0.000918007	3.80845e-06	0.00546915	1.24017e-06	0.00178096	2.01914e-06	0.00278665	6.61514e-07	0.000912968	7.09491e-07	0.000543368	2.33032e-07	0.000178469
5170	26	4.71302e-07	0.00030373	1.58437e-07	0.000102104	3.29335e-06	0.00487346	1.0731e-06	0.00158796	2.02547e-06	0.00283315	6.61034e-07	0.000924627	3.80985e-06	0.00550724	1.24063e-06	0.00179336	2.02727e-06	0.00280687	6.64178e-07	0.000919591	7.12167e-07	0.000550468	2.33911e-07	0.000180801
5180	26	4.62368e-07	0.000308392	1.55434e-07	0.000103672	3.29199e-06	0.00490639	1.07266e-06	0.00159869	2.02968e-06	0.00285343	6.62408e-07	0.000931245	3.80092e-06	0.00554529	1.23772e-06	0.00180575	2.02504e-06	0.00282713	6.63448e-07	0.000926228	7.06259e-07	0.000557557	2.31971e-07	0.00018313
5190	26	4.64105e-07	0.000313043	1.56017e-07	0.000105235	3.2906e-06	0.0049393	1.07221e-06	0.00160942	2.03406e-06	0.00287376	6.63836e-07	0.000937879	3.79658e-06	0.00558327	1.23631e-06	0.00181812	2.02024e-06	0.00284734	6.61875e-07	0.000932852	7.07461e-07	0.000564637	2.32366e-07	0.000185455
5200	26	4.69262e-07	0.000317701	1.57751e-07	0.000106801	3.28836e-06	0.0049722	1.07147e-06	0.00162014	2.03746e-06	0.0028941	6.64945e-07	0.00094452	3.79352e-06	0.00562123	1.23531e-06	0.00183048	2.01782e-06	0.00286755	6.61082e-07	0.000939471	7.11814e-07	0.000571729	2.33795e-07	0.000187785
5210	26	4.73206e-07	0.000322413	1.59077e-07	0.000108385	3.28515e-06	0.00500507	1.07043e-06	0.00163085	2.03595e-06	0.00291447	6.64452e-07	0.000951166	3.78923e-06	0.00565914	1.23391e-06	0.00184283	2.02479e-06	0.00288775	6.63366e-07	0.000946091	7.19405e-07	0.000578889	2.36289e-07	0.000190136
5220	26	4.71658e-07	0.000327131	1.58557e-07	0.000109971	3.29476e-06	0.00503798	1.07356e-06	0.00164157	2.03354e-06	0.00293482	6.63667e-07	0.000957807	3.7827e-06	0.00569699	1.23179e-06	0.00185515	2.02102e-06	0.00290798	6.62131e-07	0.000952717	7.23105e-07	0.000586097	2.37504e-07	0.000192504
5230	26	4.64751e-07	0.000331812	1.56235e-07	0.000111545	3.29718e-06	0.00507093	1.07435e-06	0.00165231	2.03416e-06	0.00295516	6.6387e-07	0.000964447	3.7844e-06	0.00573484	1.23234e-06	0.00186748	2.00968e-06	0.00292812	6.58414e-07	0.000959316	7.23421e-07	0.000593328	2.37608e-07	0.000194879
5240	26	4.5376e-07	0.000336405	1.5254e-07	0.000113089	3.29838e-06	0.00510392	1.07474e-06	0.00166305	2.04193e-06	0.00297555	6.66403e-07	0.0009711	3.79007e-06	0.00577271	1.23419e-06	0.00187981	1.99891e-06	0.00294818	6.54887e-07	0.000965887	7.2059e-07	0.000600547	2.36678e-07	0.00019725
5250	26	4.4912e-07	0.000340923	1.5098e-07	0.000114608	3.30465e-06	0.00513693	1.07678e-06	0.00167381	2.05303e-06	0.00299604	6.70027e-07	0.000977789	3.79497e-06	0.00581064	1.23578e-06	0.00189216	1.997e-06	0.00296816	6.54262e-07	0.000972434	7.0812e-07	0.000607688	2.32582e-07	0.000199595
5260	26	4.51416e-07	0.000345428	1.51752e-07	0.000116122	3.3096e-06	0.00517	1.0784e-06	0.00168459	2.06348e-06	0.0030166	6.73437e-07	0.000984496	3.80582e-06	0.00584867	1.23932e-06	0.00190455	1.99452e-06	0.00298812	6.53449e-07	0.000978972	6.98102e-07	0.00061472	2.29292e-07	0.000201905
5270	26	4.63872e-07	0.000350019	1.55939e-07	0.000117665	3.31369e-06	0.00520311	1.07973e-06	0.00169538	2.06844e-06	0.00303727	6.75056e-07	0.000991242	3.82057e-06	0.00588677	1.24412e-06	0.00191695	1.99005e-06	0.00300804	6.51982e-07	0.000985498	6.93583e-07	0.000621677	2.27808e-07	0.00020419
5280	26	4.7678e-07	0.000354705	1.60278e-07	0.000119241	3.3083e-06	0.00523621	1.07797e-06	0.00170616	2.0703e-06	0.00305794	6.75662e-07	0.000997991	3.82877e-06	0.00592502	1.24679e-06	0.00192941	1.99643e-06	0.00302799	6.54073e-07	0.000992035	6.92006e-07	0.000628608	2.2729e-07	0.000206467
5290	26	4.77391e-07	0.000359475	1.60484e-07	0.000120844	3.30146e-06	0.00526926	1.07575e-06	0.00171693	2.06754e-06	0.00307864	6.74762e-07	0.00100474	3.83137e-06	0.00596331	1.24764e-06	0.00194188	2.00317e-06	0.00304796	6.56283e-07	0.000998578	6.9384e-07	0.000635541	2.27892e-07	0.000208744
5300	26	4.7488e-07	0.000364227	1.5964e-07	0.000122442	3.29592e-06	0.00530225	1.07394e-06	0.00172768	2.06926e-06	0.00309932	6.75323e-07	0.0010115	3.82912e-06	0.00600161	1.2469e-06	0.00195435	1.99494e-06	0.00306794	6.53587e-07	0.00100513	6.9597e-07	0.000642487	2.28592e-07	0.000211025
5310	26	4.70412e-07	0.000368963	1.58138e-07	0.000124034	3.29288e-06	0.00533519	1.07295e-06	0.00173841	2.06396e-06	0.00311998	6.73595e-07	0.00101824	3.82232e-06	0.00603986	1.24469e-06	0.0019668	1.98778e-06	0.00308786	6.5124e-07	0.00101165	6.96714e-07	0.00064945	2.28836e-07	0.000213312
5320	26	4.55194e-07	0.000373572	1.53022e-07	0.000125583	3.293e-06	0.00536813	1.07299e-06	0.00174915	2.05956e-06	0.00314061	6.72159e-07	0.00102497	3.81513e-06	0.00607806	1.24235e-06	0.00197924	1.98298e-06	0.00310772	6.49666e-07	0.00101816	6.95993e-07	0.000656412	2.28599e-07	0.000215599
5330	26	4.4797e-07	0.000378102	1.50593e-07	0.000127106	3.29619e-06	0.00540107	1.07403e-06	0.00175988	2.06429e-06	0.00316123	6.737e-07	0.0010317	3.80935e-06	0.00611618	1.24047e-06	0.00199166	1.98443e-06	0.00312756	6.50141e-07	0.00102466	6.94099e-07	0.00066336	2.27977e-07	0.000217881
5340	26	4.50151e-07	0.000382593	1.51327e-07	0.000128616	3.29116e-06	0.005434	1.07239e-06	0.00177061	2.07374e-06	0.00318193	6.76785e-07	0.00103845	3.81195e-06	0.00615429	1.24131e-06	0.00200407	1.98501e-06	0.00314741	6.50332e-07	0.00103116	6.9385e-07	0.00067031	2.27895e-07	0.000220164
5350	26	4.57155e-07	0.000387144	1.53681e-07	0.000130146	3.28749e-06	0.00546689	1.07119e-06	0.00178133	2.081e-06	0.0032027	6.79156e-07	0.00104523	3.81741e-06	0.00619244	1.24309e-06	0.00201649	1.98318e-06	0.00316724	6.49734e-07	0.00103766	6.99422e-07	0.000677286	2.29726e-07	0.000222455
5360	26	4.59775e-07	0.000391711	1.54562e-07	0.000131681	3.28832e-06	0.00549978	1.07146e-06	0.00179204	2.08259e-06	0.0032235	6.79675e-07	0.00105202	3.81938e-06	0.00623062	1.24373e-06	0.00202892	1.97828e-06	0.00318706	6.48129e-07	0.00104415	7.03334e-07	0.000684289	2.3101e-07	0.000224755
5370	26	4.56445e-07	0.000396293	1.53442e-07	0.000133221	3.29889e-06	0.00553273	1.07491e-06	0.00180278	2.07553e-06	0.00324429	6.7737e-07	0.00105881	3.81837e-06	0.00626881	1.2434e-06	0.00204136	1.97924e-06	0.00320685	6.48443e-07	0.00105063	7.05089e-07	0.00069133	2.31587e-07	0.000227068
5380	26	4.55966e-07	0.000400859	1.53281e-07	0.000134756	3.3071e-06	0.00556576	1.07758e-06	0.00181354	2.07345e-06	0.00326504	6.76691e-07	0.00106558	3.8144e-06	0.00630697	1.24211e-06	0.00205379	1.98312e-06	0.00322666	6.49713e-07	0.00105712	7.0816e-07	0.000698401	2.32596e-07	0.00022939
5390	26	4.58449e-07	0.000405432	1.54116e-07	0.000136293	3.31331e-06	0.00559885	1.07961e-06	0.00182432	2.07751e-06	0.0032858	6.78018e-07	0.00107235	3.81026e-06	0.00634509	1.24076e-06	0.0020662	1.98678e-06	0.00324651	6.50913e-07	0.00106363	7.07772e-07	0.00070547	2.32468e-07	0.000231712
5400	26	4.67301e-07	0.000410062	1.57092e-07	0.00013785	3.31423e-06	0.00563198	1.07991e-06	0.00183512	2.09186e-06	0.00330665	6.82698e-07	0.00107916	3.80679e-06	0.00638318	1.23963e-06	0.0020786	1.98015e-06	0.00326634	6.4874e-07	0.00107012	6.9882e-07	0.000712507	2.29528e-07	0.000234023
5410	26	4.83448e-07	0.000414815	1.6252e-07	0.000139448	3.30249e-06	0.00566507	1.07608e-06	0.0018459	2.09702e-06	0.00332759	6.84384e-07	0.00108599	3.80793e-06	0.00642126	1.24e-06	0.002091	1.9714e-06	0.0032861	6.45873e-07	0.0010766	7.02972e-07	0.000719516	2.30891e-07	0.000236325
5420	26	4.9582e-07	0.000419708	1.66679e-07	0.000141093	3.30259e-06	0.0056981	1.07611e-06	0.00185666	2.09724e-06	0.00334856	6.84457e-07	0.00109284	3.81009e-06	0.00645935	1.24071e-06	0.00210341	1.97658e-06	0.00330584	6.47571e-07	0.00108307	7.11745e-07	0.00072659	2.33773e-07	0.000238649
5430	26	4.95735e-07	0.000424661	1.6665e-07	0.000142758	3.29874e-06	0.0057311	1.07486e-06	0.00186741	2.09881e-06	0.00336954	6.84967e-07	0.00109968	3.80782e-06	0.00649743	1.23997e-06	0.00211581	1.98452e-06	0.00332566	6.50173e-07	0.00108956	7.17955e-07	0.000733744	2.35813e-07	0.000240999
5440	26	4.92187e-07	0.000429601	1.65458e-07	0.000144418	3.29693e-06	0.00576408	1.07427e-06	0.00187816	2.09889e-06	0.00339053	6.84993e-07	0.00110653	3.80515e-06	0.0065355	1.2391e-06	0.0021282	1.99152e-06	0.00334554	6.52464e-07	0.00109607	7.22391e-07	0.000740945	2.3727e-07	0.000243364
5450	26	4.88984e-07	0.000434513	1.64381e-07	0.000146069	3.3011e-06	0.00579707	1.07563e-06	0.00188891	2.0959e-06	0.00341151	6.84019e-07	0.00111338	3.80397e-06	0.00657355	1.23872e-06	0.00214059	1.99765e-06	0.00336547	6.54474e-07	0.0011026	7.25981e-07	0.00074818	2.38449e-07	0.00024574
5460	26	4.88421e-07	0.000439399	1.64192e-07	0.000147712	3.31603e-06	0.00583019	1.08049e-06	0.0018997	2.10054e-06	0.0034325	6.85532e-07	0.00112023	3.81637e-06	0.00661168	1.24275e-06	0.00215301	1.98341e-06	0.00338534	6.49807e-07	0.00110911	7.27657e-07	0.000755451	2.38999e-07	0.000248128
5470	26	4.99856e-07	0.000444365	1.68036e-07	0.000149381	3.32755e-06	0.00586339	1.08425e-06	0.00191052	2.10205e-06	0.0034535	6.86026e-07	0.00112709	3.82227e-06	0.00664985	1.24467e-06	0.00216544	1.97505e-06	0.00340515	6.47068e-07	0.0011156	7.27198e-07	0.000762721	2.38848e-07	0.000250516
5480	26	5.21794e-07	0.000449429	1.75411e-07	0.000151084	3.3335e-06	0.00589668	1.08618e-06	0.00192137	2.09968e-06	0.00347452	6.85251e-07	0.00113394	3.8217e-06	0.00668808	1.24449e-06	0.00217789	1.97442e-06	0.0034249	6.46862e-07	0.00112207	7.2478e-07	0.000769986	2.38054e-07	0.000252902
5490	26	5.26119e-07	0.000454668	1.76864e-07	0.000152845	3.32258e-06	0.00592996	1.08263e-06	0.00193221	2.09376e-06	0.00349548	6.83319e-07	0.00114079	3.82724e-06	0.00672632	1.24629e-06	0.00219034	1.98248e-06	0.00344468	6.49504e-07	0.00112855	7.24381e-07	0.000777233	2.37923e-07	0.000255282
5500	26	5.23764e-07	0.000459912	1.76073e-07	0.000154608	3.31494e-06	0.00596313	1.08014e-06	0.00194302	2.09558e-06	0.00351643	6.83913e-07	0.00114762	3.81992e-06	0.00676454	1.24391e-06	0.00220279	1.97853e-06	0.00346448	6.48209e-07	0.00113504	7.29095e-07	0.000784511	2.39472e-07	0.000257673
5510	26	5.19529e-07	0.000465123	1.74649e-07	0.000156359	3.3136e-06	0.0059963	1.0797e-06	0.00195383	2.09569e-06	0.00353739	6.83949e-07	0.00115446	3.81377e-06	0.00680271	1.24191e-06	0.00221522	1.97657e-06	0.00348426	6.47566e-07	0.00114152	7.34477e-07	0.00079183	2.41239e-07	0.000260077
5520	26	5.13036e-07	0.000470292	1.72466e-07	0.000158097	3.3198e-06	0.00602946	1.08172e-06	0.00196463	2.09374e-06	0.00355833	6.83313e-07	0.0011613	3.80903e-06	0.00684083	1.24036e-06	0.00222763	1.977e-06	0.00350403	6.47707e-07	0.001148	7.4066e-07	0.000799199	2.4327e-07	0.000262497
5530	26	5.04203e-07	0.000475373	1.69497e-07	0.000159805	3.32493e-06	0.00606268	1.08339e-06	0.00197546	2.096e-06	0.00357929	6.8405e-07	0.00116814	3.81764e-06	0.00687898	1.24317e-06	0.00224005	1.98395e-06	0.00352384	6.49985e-07	0.00115449	7.53249e-07	0.000806681	2.47405e-07	0.000264955
5540	26	5.04779e-07	0.000480436	1.69691e-07	0.000161507	3.32953e-06	0.00609595	1.08489e-06	0.0019863	2.10114e-06	0.00360028	6.85729e-07	0.00117499	3.82927e-06	0.00691722	1.24695e-06	0.0022525	1.99286e-06	0.00354373	6.52904e-07	0.001161	7.66202e-07	0.000814275	2.51659e-07	0.000267449
5550	26	5.16114e-07	0.000485519	1.73501e-07	0.000163216	3.33417e-06	0.00612927	1.0864e-06	0.00199715	2.10767e-06	0.00362131	6.87861e-07	0.00118185	3.83893e-06	0.00695554	1.2501e-06	0.00226498	2.00099e-06	0.00356368	6.55569e-07	0.00116754	7.7575e-07	0.000821965	2.54795e-07	0.000269975
5560	26	5.1516e-07	0.000490674	1.7318e-07	0.000164949	3.34135e-06	0.00616266	1.08874e-06	0.00200804	2.10951e-06	0.0036424	6.8846e-07	0.00118873	3.84226e-06	0.00699395	1.25118e-06	0.00227749	2.00226e-06	0.0035837	6.55985e-07	0.0011741	7.70148e-07	0.000829683	2.52955e-07	0.00027251
5570	26	5.09274e-07	0.00049578	1.71202e-07	0.000166666	3.34342e-06	0.00619607	1.08942e-06	0.00201892	2.10993e-06	0.00366349	6.88599e-07	0.00119562	3.84683e-06	0.0070324	1.25267e-06	0.00229001	2.00409e-06	0.00360374	6.56583e-07	0.00118066	7.72507e-07	0.000837421	2.5373e-07	0.000275051
5580	26	4.98171e-07	0.000500836	1.67469e-07	0.000168365	3.34009e-06	0.00622949	1.08833e-06	0.00202981	2.10887e-06	0.00368459	6.8825e-07	0.0012025	3.85269e-06	0.00707089	1.25458e-06	0.00230255	2.0065e-06	0.00362378	6.57373e-07	0.00118723	7.83288e-07	0.000845182	2.57271e-07	0.0002776
5590	26	5.00575e-07	0.000505837	1.68277e-07	0.000170046	3.33479e-06	0.00626286	1.0866e-06	0.00204069	2.10439e-06	0.00370565	6.86789e-07	0.00120938	3.86859e-06	0.0071095	1.25976e-06	0.00231512	2.01396e-06	0.00364389	6.59816e-07	0.00119382	7.83814e-07	0.000853012	2.57444e-07	0.000280172
5600	26	5.05147e-07	0.000510869	1.69814e-07	0.000171738	3.3398e-06	0.00629625	1.08824e-06	0.00205156	2.1046e-06	0.0037267	6.86859e-07	0.00121625	3.87938e-06	0.00714825	1.26327e-06	0.00232774	2.01519e-06	0.00366403	6.60219e-07	0.00120042	7.86355e-07	0.000860867	2.58278e-07	0.000282752
5610	26	5.10501e-07	0.00051595	1.71614e-07	0.000173446	3.34565e-06	0.00632967	1.09014e-06	0.00206245	2.11322e-06	0.0037478	6.89672e-07	0.00122313	3.8829e-06	0.00718705	1.26442e-06	0.00234037	2.01892e-06	0.00368421	6.61442e-07	0.00120703	7.86642e-07	0.000868726	2.58373e-07	0.000285333
5620	26	5.17106e-07	0.000521081	1.73835e-07	0.000175171	3.34831e-06	0.00636314	1.09101e-06	0.00207336	2.12784e-06	0.00376899	6.94443e-07	0.00123005	3.8814e-06	0.00722588	1.26393e-06	0.00235302	2.02787e-06	0.00370443	6.64374e-07	0.00121365	7.83561e-07	0.000876583	2.57361e-07	0.000287914
5630	26	5.26032e-07	0.000526311	1.76835e-07	0.000176929	3.34898e-06	0.00639662	1.09123e-06	0.00208427	2.1348e-06	0.00379031	6.96714e-07	0.00123701	3.88166e-06	0.00726469	1.26402e-06	0.00236566	2.03701e-06	0.00372477	6.67369e-07	0.00122032	7.83391e-07	0.000884417	2.57305e-07	0.000290487
5640	26	5.28023e-07	0.000531569	1.77505e-07	0.000178697	3.34961e-06	0.00643012	1.09143e-06	0.00209518	2.13878e-06	0.00381167	6.98013e-07	0.00124398	3.88423e-06	0.00730352	1.26485e-06	0.0023783	2.03976e-06	0.00374514	6.6827e-07	0.00122699	7.87887e-07	0.000892278	2.58782e-07	0.000293069
5650	26	5.24393e-07	0.00053683	1.76284e-07	0.000180465	3.35051e-06	0.00646362	1.09173e-06	0.0021061	2.1372e-06	0.00383304	6.97497e-07	0.00125095	3.88483e-06	0.00734236	1.26505e-06	0.00239095	2.03411e-06	0.00376551	6.6642e-07	0.00123366	7.88188e-07	0.000900144	2.58881e-07	0.000295653
5660	26	5.20853e-07	0.000542061	1.75094e-07	0.000182224	3.35133e-06	0.00649712	1.09199e-06	0.00211702	2.13008e-06	0.00385439	6.95173e-07	0.00125792	3.87933e-06	0.00738119	1.26325e-06	0.00240359	2.02374e-06	0.00378581	6.63023e-07	0.00124031	7.75798e-07	0.000907979	2.54811e-07	0.000298226
5670	26	5.22199e-07	0.000547277	1.75547e-07	0.000183977	3.34273e-06	0.00653059	1.08919e-06	0.00212792	2.11978e-06	0.00387563	6.91813e-07	0.00126485	3.87872e-06	0.00741998	1.26306e-06	0.00241622	2.02725e-06	0.00380607	6.64171e-07	0.00124695	7.72108e-07	0.000915719	2.53599e-07	0.000300768
5680	26	5.29525e-07	0.000552532	1.7801e-07	0.000185744	3.34451e-06	0.00656402	1.08977e-06	0.00213882	2.12597e-06	0.00389686	6.93831e-07	0.00127178	3.89002e-06	0.00745882	1.26674e-06	0.00242887	2.03304e-06	0.00382637	6.66069e-07	0.0012536	7.77459e-07	0.000923464	2.55357e-07	0.000303312
5690	26	5.37056e-07	0.000557875	1.80541e-07	0.00018754	3.34262e-06	0.00659746	1.08916e-06	0.00214971	2.1291e-06	0.00391814	6.94854e-07	0.00127872	3.89067e-06	0.00749772	1.26695e-06	0.00244154	2.0305e-06	0.00384668	6.65235e-07	0.00126026	7.86186e-07	0.000931295	2.58223e-07	0.000305884
5700	26	5.36596e-07	0.00056323	1.80386e-07	0.00018934	3.33494e-06	0.00663083	1.08665e-06	0.00216058	2.13377e-06	0.00393946	6.96377e-07	0.00128568	3.89019e-06	0.00753662	1.26679e-06	0.00245421	2.02888e-06	0.00386698	6.64704e-07	0.00126691	7.93119e-07	0.00093919	2.605e-07	0.000308477
5710	26	5.29508e-07	0.000568572	1.78004e-07	0.000191136	3.32669e-06	0.00666417	1.08397e-06	0.00217145	2.14024e-06	0.00396081	6.98488e-07	0.00129265	3.89027e-06	0.00757553	1.26682e-06	0.00246687	2.03061e-06	0.00388728	6.6527e-07	0.00127356	7.96441e-07	0.000947126	2.61591e-07	0.000311084
5720	26	5.23063e-07	0.000573831	1.75837e-07	0.000192904	3.3428e-06	0.00669752	1.08921e-06	0.00218231	2.14429e-06	0.00398224	6.9981e-07	0.00129964	3.88897e-06	0.00761442	1.26639e-06	0.00247954	2.04195e-06	0.00390765	6.68987e-07	0.00128023	7.87257e-07	0.000955039	2.58575e-07	0.000313683
5730	26	5.29171e-07	0.000579102	1.7789e-07	0.000194676	3.3507e-06	0.00673099	1.09179e-06	0.00219322	2.15366e-06	0.00400374	7.02869e-07	0.00130666	3.88363e-06	0.00765328	1.26466e-06	0.00249219	2.0479e-06	0.0039281	6.70936e-07	0.00128693	7.85198e-07	0.000962906	2.57899e-07	0.000316267
5740	26	5.29522e-07	0.00058438	1.78008e-07	0.00019645	3.35077e-06	0.00676449	1.09181e-06	0.00220413	2.16354e-06	0.00402533	7.06094e-07	0.00131371	3.87732e-06	0.00769208	1.2626e-06	0.00250483	2.0526e-06	0.0039486	6.72476e-07	0.00129365	7.92155e-07	0.000970811	2.60183e-07	0.000318863
5750	26	5.21997e-07	0.000589658	1.75479e-07	0.000198224	3.34676e-06	0.00679798	1.0905e-06	0.00221505	2.17239e-06	0.00404699	7.08982e-07	0.00132077	3.87143e-06	0.00773084	1.26068e-06	0.00251745	2.0577e-06	0.00396914	6.74147e-07	0.00130038	8.04349e-07	0.000978761	2.64189e-07	0.000321474
5760	26	5.23758e-07	0.000594892	1.76071e-07	0.000199984	3.34415e-06	0.00683143	1.08965e-06	0.00222595	2.17869e-06	0.00406876	7.11037e-07	0.00132788	3.8767e-06	0.00776959	1.2624e-06	0.00253007	2.06061e-06	0.00398974	6.75099e-07	0.00130713	8.05662e-07	0.000986814	2.6462e-07	0.00032412
5770	26	5.27872e-07	0.000600148	1.77454e-07	0.000201751	3.3459e-06	0.00686489	1.09022e-06	0.00223685	2.17447e-06	0.00409051	7.09662e-07	0.00133498	3.87964e-06	0.00780837	1.26336e-06	0.0025427	2.05434e-06	0.00401031	6.73047e-07	0.00131386	8.0348e-07	0.000994857	2.63903e-07	0.000326761
5780	26	5.31824e-07	0.000605445	1.78783e-07	0.000203531	3.35342e-06	0.00689839	1.09268e-06	0.00224776	2.1617e-06	0.00411219	7.05492e-07	0.00134206	3.88039e-06	0.00784717	1.2636e-06	0.00255533	2.04003e-06	0.00403078	6.68358e-07	0.00132057	7.94839e-07	0.00100284	2.61065e-07	0.000329385
5790	26	5.31518e-07	0.000610763	1.7868e-07	0.000205319	3.36092e-06	0.00693195	1.09512e-06	0.0022587	2.1581e-06	0.0041338	7.04317e-07	0.00134911	3.88271e-06	0.00788598	1.26436e-06	0.00256797	2.03258e-06	0.00405115	6.65916e-07	0.00132725	7.85894e-07	0.00101076	2.58127e-07	0.000331985
5800	26	5.35051e-07	0.000616096	1.79867e-07	0.000207112	3.36635e-06	0.00696559	1.09689e-06	0.00226966	2.16304e-06	0.0041554	7.05931e-07	0.00135616	3.88701e-06	0.00792483	1.26576e-06	0.00258062	2.03126e-06	0.00407147	6.65486e-07	0.0013339	7.92358e-07	0.00101865	2.6025e-07	0.000334577
5810	26	5.36585e-07	0.000621455	1.80383e-07	0.000208913	3.36156e-06	0.0069992	1.09533e-06	0.00228061	2.15605e-06	0.00417699	7.03648e-07	0.0013632	3.89053e-06	0.00796372	1.2669e-06	0.00259329	2.02626e-06	0.00409174	6.63847e-07	0.00134054	8.01007e-07	0.00102663	2.63091e-07	0.000337197
5820	26	5.36917e-07	0.000626821	1.80495e-07	0.000210717	3.35586e-06	0.00703281	1.09347e-06	0.00229156	2.1543e-06	0.00419855	7.03079e-07	0.00137024	3.88973e-06	0.00800262	1.26664e-06	0.00260595	2.02248e-06	0.004112	6.62607e-07	0.00134718	8.04752e-07	0.00103465	2.64321e-07	0.000339832
5830	26	5.36604e-07	0.000632189	1.80389e-07	0.000212522	3.35359e-06	0.00706635	1.09273e-06	0.00230249	2.15775e-06	0.0042201	7.04203e-07	0.00137727	3.88588e-06	0.0080415	1.26539e-06	0.00261861	2.02768e-06	0.00413226	6.64312e-07	0.00135382	8.04676e-07	0.0010427	2.64296e-07	0.000342475
5840	26	5.3696e-07	0.000637558	1.80509e-07	0.000214327	3.35294e-06	0.00709989	1.09252e-06	0.00231342	2.15282e-06	0.00424164	7.02594e-07	0.0013843	3.87955e-06	0.00808031	1.26333e-06	0.00263125	2.03765e-06	0.00415259	6.67578e-07	0.00136048	8.04866e-07	0.00105075	2.64359e-07	0.000345118
5850	26	5.45381e-07	0.000642954	1.8334e-07	0.000216141	3.35422e-06	0.00713342	1.09293e-06	0.00232435	2.15169e-06	0.00426317	7.02227e-07	0.00139133	3.87821e-06	0.00811911	1.26289e-06	0.00264388	2.05015e-06	0.00417301	6.71675e-07	0.00136717	8.02386e-07	0.00105879	2.63544e-07	0.000347759
5860	26	5.61511e-07	0.000648515	1.88762e-07	0.00021801	3.35908e-06	0.00716699	1.09452e-06	0.00233529	2.149e-06	0.00428466	7.01348e-07	0.00139834	3.86787e-06	0.00815782	1.25952e-06	0.00265649	2.04551e-06	0.00419349	6.70154e-07	0.00137388	7.9967e-07	0.00106679	2.62652e-07	0.000350389
5870	26	5.72868e-07	0.000654174	1.9258e-07	0.000219913	3.3628e-06	0.0072006	1.09573e-06	0.00234624	2.1482e-06	0.00430616	7.01087e-07	0.00140536	3.85683e-06	0.00819646	1.25593e-06	0.00266907	2.04226e-06	0.00421392	6.69087e-07	0.00138057	7.97254e-07	0.00107478	2.61858e-07	0.000353012
5880	26	5.78006e-07	0.000659923	1.94307e-07	0.000221845	3.36058e-06	0.00723421	1.09501e-06	0.00235719	2.15443e-06	0.00432767	7.03121e-07	0.00141238	3.85384e-06	0.00823501	1.25496e-06	0.00268163	2.03774e-06	0.00423432	6.67609e-07	0.00138726	7.93171e-07	0.00108273	2.60517e-07	0.000355624
5890	26	5.80955e-07	0.000665723	1.95299e-07	0.000223795	3.35388e-06	0.00726779	1.09283e-06	0.00236813	2.16079e-06	0.00434925	7.05195e-07	0.00141942	3.85138e-06	0.00827353	1.25415e-06	0.00269417	2.03477e-06	0.00425469	6.66637e-07	0.00139393	7.87774e-07	0.00109063	2.58745e-07	0.000358217
5900	26	5.84309e-07	0.000671552	1.96426e-07	0.000225754	3.34959e-06	0.00730131	1.09143e-06	0.00237905	2.16359e-06	0.00437087	7.06109e-07	0.00142648	3.85156e-06	0.00831206	1.25421e-06	0.00270672	2.04261e-06	0.00427507	6.69202e-07	0.00140061	7.8134e-07	0.00109847	2.56631e-07	0.000360793
5910	26	5.88044e-07	0.000677407	1.97682e-07	0.000227723	3.34701e-06	0.0073348	1.09059e-06	0.00238996	2.16305e-06	0.0043925	7.05933e-07	0.00143354	3.85422e-06	0.00835058	1.25508e-06	0.00271926	2.04674e-06	0.00429552	6.70555e-07	0.00140731	7.7393e-07	0.00110626	2.54197e-07	0.000363351
5920	26	5.90813e-07	0.000683302	1.98613e-07	0.000229704	3.34239e-06	0.00736824	1.08908e-06	0.00240086	2.16067e-06	0.00441412	7.05157e-07	0.00144059	3.85367e-06	0.00838912	1.2549e-06	0.00273181	2.05039e-06	0.00431601	6.71754e-07	0.00141402	7.66327e-07	0.00111396	2.517e-07	0.000365879
5930	26	5.88729e-07	0.000689196	1.97912e-07	0.000231686	3.33205e-06	0.0074016	1.08571e-06	0.00241173	2.15896e-06	0.00443571	7.046e-07	0.00144764	3.84481e-06	0.00842761	1.25201e-06	0.00274434	2.04619e-06	0.00433648	6.70377e-07	0.00142072	7.64595e-07	0.00112162	2.51131e-07	0.000368395
5940	26	5.81518e-07	0.000695044	1.95488e-07	0.000233652	3.32081e-06	0.00743487	1.08205e-06	0.00242257	2.15856e-06	0.0044573	7.04467e-07	0.00145469	3.82843e-06	0.00846597	1.24668e-06	0.00275684	2.03483e-06	0.00435688	6.66656e-07	0.00142741	7.69358e-07	0.00112929	2.52696e-07	0.000370915
5950	26	5.72859e-07	0.000700822	1.92577e-07	0.000235594	3.32236e-06	0.00746809	1.08256e-06	0.0024334	2.15553e-06	0.00447886	7.03481e-07	0.00146172	3.8117e-06	0.00850418	1.24123e-06	0.00276928	2.02367e-06	0.00437717	6.62997e-07	0.00143406	7.76112e-07	0.00113701	2.54914e-07	0.000373451
5960	26	5.68176e-07	0.000706517	1.91003e-07	0.000237509	3.32781e-06	0.00750135	1.08433e-06	0.00244423	2.13793e-06	0.00450029	6.97736e-07	0.00146871	3.80565e-06	0.00854226	1.23926e-06	0.00278168	2.01559e-06	0.00439737	6.60351e-07	0.00144067	7.7854e-07	0.00114479	2.55712e-07	0.000376006
5970	26	5.66847e-07	0.000712209	1.90556e-07	0.000239422	3.33395e-06	0.00753466	1.08633e-06	0.00245509	2.12187e-06	0.00452162	6.92495e-07	0.00147568	3.80269e-06	0.00858032	1.2383e-06	0.00279407	2.00914e-06	0.0044175	6.58237e-07	0.00144727	7.79451e-07	0.00115257	2.56011e-07	0.000378562
5980	26	5.71758e-07	0.000717899	1.92207e-07	0.000241335	3.33039e-06	0.00756798	1.08517e-06	0.00246594	2.10869e-06	0.00454278	6.88191e-07	0.00148258	3.80547e-06	0.00861836	1.2392e-06	0.00280646	1.99372e-06	0.00443753	6.53186e-07	0.00145383	7.77539e-07	0.00116036	2.55383e-07	0.000381119
5990	26	5.6465e-07	0.000723554	1.89817e-07	0.000243236	3.31787e-06	0.00760119	1.08109e-06	0.00247676	2.09882e-06	0.00456381	6.84971e-07	0.00148944	3.79743e-06	0.00865634	1.23658e-06	0.00281883	1.98633e-06	0.00445742	6.50766e-07	0.00146035	7.70954e-07	0.00116808	2.5322e-07	0.000383657
6000	26	5.55362e-07	0.000729165	1.86695e-07	0.000245122	3.30611e-06	0.00763432	1.07726e-06	0.00248756	2.09205e-06	0.00458477	6.82762e-07	0.00149629	3.78447e-06	0.00869425	1.23236e-06	0.00283117	1.98105e-06	0.00447726	6.49035e-07	0.00146685	7.61898e-07	0.00117575	2.50246e-07	0.000386175
6010	26	5.49335e-07	0.000734688	1.84669e-07	0.000246979	3.29962e-06	0.00766735	1.07514e-06	0.00249832	2.0909e-06	0.00460569	6.82385e-07	0.00150311	3.76675e-06	0.008732	1.22659e-06	0.00284347	1.97214e-06	0.00449702	6.46116e-07	0.00147332	7.49873e-07	0.0011833	2.46296e-07	0.000388656
6020	26	5.56037e-07	0.000740222	1.86922e-07	0.000248839	3.2928e-06	0.00770032	1.07292e-06	0.00250907	2.08499e-06	0.00462657	6.80458e-07	0.00150993	3.7587e-06	0.00876966	1.22397e-06	0.00285573	1.95979e-06	0.0045167	6.42069e-07	0.00147977	7.41061e-07	0.00119078	2.43402e-07	0.000391111
6030	26	5.61922e-07	0.00074581	1.889e-07	0.000250718	3.28639e-06	0.00773321	1.07083e-06	0.00251978	2.08482e-06	0.00464743	6.80402e-07	0.00151673	3.75268e-06	0.0088072	1.22201e-06	0.00286796	1.95169e-06	0.00453625	6.39415e-07	0.00148617	7.43759e-07	0.00119821	2.44288e-07	0.000393552
6040	26	5.5826e-07	0.000751411	1.87669e-07	0.000252601	3.28688e-06	0.00776609	1.07099e-06	0.00253049	2.08781e-06	0.00466828	6.81379e-07	0.00152354	3.74406e-06	0.0088447	1.21921e-06	0.00288016	1.94943e-06	0.00455576	6.38676e-07	0.00149257	7.52265e-07	0.00120568	2.47082e-07	0.000396007
6050	26	5.52109e-07	0.000756972	1.85602e-07	0.00025447	3.30305e-06	0.00779901	1.07626e-06	0.00254122	2.0792e-06	0.00468913	6.78567e-07	0.00153034	3.74178e-06	0.00888213	1.21846e-06	0.00289235	1.94909e-06	0.00457525	6.38564e-07	0.00149895	7.59777e-07	0.00121323	2.49549e-07	0.000398487
6060	26	5.64064e-07	0.00076256	1.89621e-07	0.000256349	3.29737e-06	0.00783199	1.07441e-06	0.00255197	2.07502e-06	0.0047099	6.77204e-07	0.00153712	3.74196e-06	0.00891955	1.21852e-06	0.00290454	1.95567e-06	0.0045948	6.4072e-07	0.00150536	7.59231e-07	0.00122083	2.4937e-07	0.000400981
6070	26	5.6544e-07	0.000768205	1.90083e-07	0.000258246	3.29029e-06	0.00786494	1.0721e-06	0.0025627	2.08327e-06	0.00473071	6.79898e-07	0.00154392	3.73743e-06	0.00895693	1.21705e-06	0.00291671	1.95866e-06	0.00461434	6.41701e-07	0.00151176	7.58666e-07	0.00122842	2.49184e-07	0.000403473
6080	26	5.67745e-07	0.00077388	1.90858e-07	0.000260154	3.28215e-06	0.00789779	1.06945e-06	0.00257341	2.08923e-06	0.00475155	6.8184e-07	0.00155072	3.73295e-06	0.00899429	1.21559e-06	0.00292888	1.95172e-06	0.00463389	6.39424e-07	0.00151816	7.57546e-07	0.001236	2.48816e-07	0.000405963
6090	26	5.76221e-07	0.000779598	1.93707e-07	0.000262076	3.27618e-06	0.00793059	1.06751e-06	0.0025841	2.08584e-06	0.00477243	6.80736e-07	0.00155753	3.73038e-06	0.00903161	1.21475e-06	0.00294103	1.94361e-06	0.00465336	6.36768e-07	0.00152454	7.55142e-07	0.00124356	2.48027e-07	0.000408447
6100	26	5.85936e-07	0.000785404	1.96973e-07	0.000264028	3.27225e-06	0.00796334	1.06623e-06	0.00259477	2.08804e-06	0.0047933	6.81452e-07	0.00156434	3.72604e-06	0.00906889	1.21334e-06	0.00295317	1.93441e-06	0.00467277	6.33756e-07	0.0015309	7.53782e-07	0.00125111	2.4758e-07	0.000410926
6110	26	5.86747e-07	0.000791266	1.97246e-07	0.000265999	3.27429e-06	0.00799608	1.06689e-06	0.00260544	2.089e-06	0.00481419	6.81767e-07	0.00157116	3.7117e-06	0.00910608	1.20867e-06	0.00296528	1.92795e-06	0.00469207	6.3164e-07	0.00153722	7.46814e-07	0.00125861	2.45291e-07	0.000413391
6120	26	5.84726e-07	0.000797122	1.96566e-07	0.000267967	3.27718e-06	0.00802883	1.06783e-06	0.00261611	2.08542e-06	0.00483505	6.80598e-07	0.00157797	3.70821e-06	0.00914318	1.20753e-06	0.00297736	1.92392e-06	0.00471135	6.30319e-07	0.00154354	7.36573e-07	0.00126601	2.41928e-07	0.000415822
6130	26	5.80026e-07	0.000802944	1.94986e-07	0.000269924	3.27775e-06	0.00806161	1.06802e-06	0.00262679	2.08175e-06	0.00485589	6.79401e-07	0.00158477	3.71144e-06	0.00918028	1.20859e-06	0.00298944	1.92817e-06	0.00473061	6.31711e-07	0.00154985	7.25144e-07	0.00127333	2.38174e-07	0.000418225
6140	26	5.70143e-07	0.000808699	1.91664e-07	0.000271859	3.27791e-06	0.00809439	1.06807e-06	0.00263747	2.08025e-06	0.00487671	6.78911e-07	0.00159156	3.71423e-06	0.0092174	1.20949e-06	0.00300153	1.93027e-06	0.0047499	6.32399e-07	0.00155617	7.12508e-07	0.00128052	2.34024e-07	0.000420588
6150	26	5.63043e-07	0.000814352	1.89277e-07	0.000273759	3.27659e-06	0.00812716	1.06764e-06	0.00264815	2.079e-06	0.0048975	6.78502e-07	0.00159835	3.70879e-06	0.00925451	1.20772e-06	0.00301361	1.93094e-06	0.0047692	6.32618e-07	0.0015625	7.02223e-07	0.00128758	2.30645e-07	0.000422905
6160	26	5.54852e-07	0.00081994	1.86524e-07	0.000275638	3.25545e-06	0.00815981	1.06075e-06	0.00265878	2.07327e-06	0.00491825	6.76633e-07	0.00160512	3.70387e-06	0.00929158	1.20612e-06	0.00302568	1.93233e-06	0.00478852	6.33072e-07	0.00156883	6.93199e-07	0.00129456	2.27681e-07	0.000425199
6170	26	5.45405e-07	0.000825452	1.83348e-07	0.000277491	3.24241e-06	0.0081923	1.0565e-06	0.00266937	2.06254e-06	0.00493894	6.73131e-07	0.00161187	3.69984e-06	0.0093286	1.20481e-06	0.00303774	1.93463e-06	0.00480786	6.33828e-07	0.00157516	6.85686e-07	0.00130146	2.25214e-07	0.000427466
6180	26	5.36692e-07	0.000830855	1.80419e-07	0.000279307	3.23587e-06	0.00822468	1.05437e-06	0.00267992	2.05985e-06	0.00495956	6.72254e-07	0.0016186	3.70647e-06	0.00936564	1.20697e-06	0.0030498	1.93858e-06	0.00482723	6.35119e-07	0.00158151	6.7952e-07	0.00130829	2.23189e-07	0.000429708
6190	26	5.26986e-07	0.000836174	1.77156e-07	0.000281095	3.23533e-06	0.00825705	1.0542e-06	0.00269047	2.05949e-06	0.00498015	6.72136e-07	0.00162532	3.71087e-06	0.00940272	1.2084e-06	0.00306188	1.93803e-06	0.0048466	6.3494e-07	0.00158785	6.7972e-07	0.00131509	2.23254e-07	0.000431943
6200	26	5.15587e-07	0.0008414	1.73324e-07	0.000282852	3.2371e-06	0.0082894	1.05477e-06	0.00270101	2.05876e-06	0.00500074	6.71896e-07	0.00163204	3.71179e-06	0.00943984	1.2087e-06	0.00307396	1.93235e-06	0.00486595	6.33079e-07	0.00159419	6.81782e-07	0.00132189	2.23932e-07	0.000434176
6210	26	5.13638e-07	0.000846549	1.72669e-07	0.000284583	3.2343e-06	0.00832176	1.05386e-06	0.00271155	2.05541e-06	0.00502131	6.70803e-07	0.00163876	3.71511e-06	0.00947697	1.20978e-06	0.00308606	1.92433e-06	0.00488523	6.30451e-07	0.00160051	6.75508e-07	0.00132868	2.21871e-07	0.000436405
6220	26	5.14394e-07	0.000851691	1.72923e-07	0.000286312	3.23299e-06	0.0083541	1.05344e-06	0.00272209	2.04452e-06	0.00504181	6.6725e-07	0.00164545	3.71553e-06	0.00951412	1.20992e-06	0.00309816	1.91486e-06	0.00490443	6.27348e-07	0.0016068	6.72267e-07	0.00133542	2.20806e-07	0.00043862
6230	26	5.13728e-07	0.000856825	1.72699e-07	0.000288037	3.23401e-06	0.00838643	1.05377e-06	0.00273263	2.0349e-06	0.00506221	6.64111e-07	0.0016521	3.71136e-06	0.00955126	1.20856e-06	0.00311025	1.90751e-06	0.00492355	6.2494e-07	0.00161306	6.70865e-07	0.00134214	2.20346e-07	0.000440826
6240	26	5.08308e-07	0.000861937	1.70877e-07	0.000289756	3.23129e-06	0.00841875	1.05288e-06	0.00274316	2.03326e-06	0.00508255	6.63574e-07	0.00165874	3.70716e-06	0.00958835	1.20719e-06	0.00312233	1.90366e-06	0.0049426	6.23681e-07	0.0016193	6.76608e-07	0.00134889	2.22232e-07	0.000443043
6250	26	5.05032e-07	0.000867002	1.69776e-07	0.000291459	3.22666e-06	0.00845105	1.05137e-06	0.00275368	2.03463e-06	0.00510289	6.64021e-07	0.00166538	3.70494e-06	0.00962541	1.20647e-06	0.0031344	1.9003e-06	0.00496162	6.2258e-07	0.00162554	6.83482e-07	0.00135567	2.2449e-07	0.000445269
6260	26	5.04306e-07	0.000872055	1.69532e-07	0.000293157	3.22818e-06	0.00848333	1.05187e-06	0.0027642	2.03469e-06	0.00512324	6.64043e-07	0.00167202	3.70566e-06	0.00966247	1.2067e-06	0.00314646	1.89347e-06	0.00498059	6.20343e-07	0.00163175	6.73387e-07	0.00136244	2.21174e-07	0.000447494
6270	26	5.08594e-07	0.000877122	1.70973e-07	0.000294861	3.22928e-06	0.00851562	1.05223e-06	0.00277472	2.03702e-06	0.0051436	6.64803e-07	0.00167867	3.70768e-06	0.00969954	1.20736e-06	0.00315853	1.89493e-06	0.00499954	6.20821e-07	0.00163796	6.70229e-07	0.00136917	2.20137e-07	0.000449704
6280	26	5.12287e-07	0.00088222	1.72215e-07	0.000296575	3.23269e-06	0.00854793	1.05334e-06	0.00278525	2.03916e-06	0.00516397	6.65499e-07	0.00168531	3.70835e-06	0.00973661	1.20758e-06	0.0031706	1.89971e-06	0.00501851	6.22388e-07	0.00164417	6.74649e-07	0.0013759	2.21589e-07	0.000451915
6290	26	5.15075e-07	0.000887359	1.73152e-07	0.000298302	3.24068e-06	0.0085803	1.05594e-06	0.0027958	2.03172e-06	0.00518433	6.63072e-07	0.00169196	3.69445e-06	0.00977358	1.20305e-06	0.00318264	1.90318e-06	0.00503753	6.23524e-07	0.0016504	6.87099e-07	0.00138271	2.25678e-07	0.000454152
6300	26	5.2473e-07	0.000892558	1.76398e-07	0.00030005	3.24152e-06	0.00861271	1.05622e-06	0.00280636	2.03582e-06	0.00520467	6.64411e-07	0.0016986	3.68253e-06	0.0098105	1.19917e-06	0.00319467	1.91213e-06	0.0050566	6.26457e-07	0.00165665	6.93288e-07	0.00138961	2.27711e-07	0.000456417
6310	26	5.29969e-07	0.000897826	1.78159e-07	0.000301821	3.23833e-06	0.0086451	1.05518e-06	0.00281691	2.03543e-06	0.00522501	6.64284e-07	0.00170523	3.67932e-06	0.00984731	1.19813e-06	0.00320665	1.91377e-06	0.00507572	6.26993e-07	0.00166292	6.86764e-07	0.00139648	2.25568e-07	0.000458674
6320	26	5.30874e-07	0.000903127	1.78463e-07	0.000303603	3.2342e-06	0.00867747	1.05383e-06	0.00282746	2.02978e-06	0.00524535	6.62438e-07	0.00171187	3.67951e-06	0.00988411	1.19819e-06	0.00321864	1.90946e-06	0.00509484	6.2558e-07	0.00166918	6.73517e-07	0.00140331	2.21217e-07	0.000460919
6330	26	5.27418e-07	0.00090841	1.77301e-07	0.000305379	3.23867e-06	0.00870985	1.05528e-06	0.00283801	2.02443e-06	0.00526561	6.60692e-07	0.00171848	3.6752e-06	0.00992087	1.19678e-06	0.00323061	1.90181e-06	0.00511388	6.23073e-07	0.00167542	6.69353e-07	0.00141002	2.19849e-07	0.000463123
6340	26	5.23238e-07	0.000913667	1.75896e-07	0.000307146	3.2378e-06	0.00874222	1.055e-06	0.00284856	2.02665e-06	0.00528588	6.61417e-07	0.0017251	3.66902e-06	0.0099576	1.19477e-06	0.00324257	1.89132e-06	0.00513286	6.19639e-07	0.00168164	6.61946e-07	0.00141668	2.17416e-07	0.000465309
6350	26	5.18287e-07	0.000918874	1.74232e-07	0.000308896	3.22995e-06	0.00877456	1.05244e-06	0.00285909	2.03763e-06	0.0053062	6.65001e-07	0.00173173	3.6616e-06	0.00999426	1.19235e-06	0.0032545	1.87868e-06	0.00515171	6.15498e-07	0.00168781	6.52843e-07	0.00142326	2.14426e-07	0.000467469
6360	26	5.1401e-07	0.000924036	1.72794e-07	0.000310632	3.22479e-06	0.00880683	1.05076e-06	0.00286961	2.0443e-06	0.00532661	6.67178e-07	0.00173839	3.66621e-06	0.0100309	1.19386e-06	0.00326644	1.872e-06	0.00517046	6.13308e-07	0.00169396	6.52436e-07	0.00142978	2.14293e-07	0.000469613
6370	26	5.1488e-07	0.000929183	1.73086e-07	0.000312362	3.21905e-06	0.00883905	1.04889e-06	0.00288011	2.05019e-06	0.00534708	6.691e-07	0.00174507	3.67285e-06	0.0100676	1.19602e-06	0.00327839	1.87717e-06	0.00518921	6.15003e-07	0.0017001	6.51797e-07	0.0014363	2.14083e-07	0.000471755
6380	26	5.15604e-07	0.000934332	1.7333e-07	0.000314093	3.20735e-06	0.00887117	1.04508e-06	0.00289057	2.04988e-06	0.00536757	6.68999e-07	0.00175176	3.67668e-06	0.0101043	1.19726e-06	0.00329035	1.88172e-06	0.005208	6.16492e-07	0.00170625	6.56872e-07	0.00144286	2.1575e-07	0.000473907
6390	26	5.16394e-07	0.000939496	1.73595e-07	0.000315829	3.19215e-06	0.00890318	1.04013e-06	0.002901	2.04312e-06	0.00538804	6.66792e-07	0.00175844	3.67209e-06	0.0101411	1.19577e-06	0.00330232	1.88308e-06	0.00522682	6.16938e-07	0.00171242	6.642e-07	0.00144945	2.18157e-07	0.000476073
6400	26	5.21907e-07	0.000944693	1.75449e-07	0.000317576	3.18531e-06	0.00893506	1.0379e-06	0.00291139	2.03516e-06	0.00540842	6.64195e-07	0.00176509	3.66622e-06	0.0101778	1.19386e-06	0.00331426	1.88536e-06	0.00524567	6.17684e-07	0.0017186	6.58961e-07	0.00145606	2.16436e-07	0.000478244
6410	26	5.23892e-07	0.000949915	1.76116e-07	0.000319331	3.18661e-06	0.00896693	1.03832e-06	0.00292178	2.02774e-06	0.00542874	6.61772e-07	0.00177173	3.65678e-06	0.0102144	1.19079e-06	0.00332619	1.88753e-06	0.00526453	6.18397e-07	0.00172478	6.53488e-07	0.00146263	2.14638e-07	0.000480401
6420	26	5.20274e-07	0.000955133	1.749e-07	0.000321085	3.18798e-06	0.00899879	1.03877e-06	0.00293216	2.02632e-06	0.00544902	6.61311e-07	0.00177834	3.64871e-06	0.0102509	1.18816e-06	0.00333809	1.88958e-06	0.00528342	6.19067e-07	0.00173096	6.53632e-07	0.00146917	2.14686e-07	0.00048255
6430	26	5.13305e-07	0.000960308	1.72557e-07	0.000322825	3.18091e-06	0.00903064	1.03646e-06	0.00294254	2.03062e-06	0.0054693	6.62715e-07	0.00178496	3.65575e-06	0.0102874	1.19045e-06	0.00334998	1.89135e-06	0.00530232	6.19648e-07	0.00173716	6.60241e-07	0.00147573	2.16856e-07	0.000484705
6440	26	5.07186e-07	0.000965409	1.705e-07	0.00032454	3.1726e-06	0.00906241	1.03376e-06	0.00295289	2.02023e-06	0.00548955	6.59323e-07	0.00179157	3.65139e-06	0.010324	1.18903e-06	0.00336187	1.89112e-06	0.00532123	6.19571e-07	0.00174335	6.63839e-07	0.00148235	2.18038e-07	0.00048688
6450	26	5.10207e-07	0.000970502	1.71516e-07	0.000326252	3.16524e-06	0.0090941	1.03136e-06	0.00296321	2.01829e-06	0.00550974	6.58689e-07	0.00179816	3.64126e-06	0.0103604	1.18573e-06	0.00337374	1.89681e-06	0.00534017	6.21435e-07	0.00174956	6.66149e-07	0.001489	2.18797e-07	0.000489062
6460	26	5.08816e-07	0.000975589	1.71048e-07	0.000327962	3.16062e-06	0.00912572	1.02985e-06	0.00297352	2.01928e-06	0.00552993	6.59012e-07	0.00180475	3.6355e-06	0.0103968	1.18385e-06	0.00338559	1.89214e-06	0.00535911	6.19906e-07	0.00175576	6.56438e-07	0.0014956	2.15607e-07	0.000491232
6470	26	5.01764e-07	0.000980638	1.68677e-07	0.00032966	3.16011e-06	0.00915733	1.02969e-06	0.00298382	2.02069e-06	0.00555013	6.59474e-07	0.00181134	3.63338e-06	0.0104332	1.18316e-06	0.00339743	1.88655e-06	0.005378	6.18075e-07	0.00176195	6.50564e-07	0.00150214	2.13678e-07	0.000493379
6480	26	4.87319e-07	0.000985568	1.63821e-07	0.000331317	3.16278e-06	0.00918895	1.03056e-06	0.00299412	2.02094e-06	0.00557034	6.59554e-07	0.00181794	3.63297e-06	0.0104695	1.18303e-06	0.00340926	1.88101e-06	0.00539685	6.1626e-07	0.00176812	6.4703e-07	0.00150864	2.12517e-07	0.000495512
6490	26	4.77322e-07	0.000990407	1.60461e-07	0.000332944	3.17028e-06	0.00922061	1.033e-06	0.00300444	2.01769e-06	0.00559052	6.58495e-07	0.00182452	3.63254e-06	0.0105058	1.18289e-06	0.00342109	1.87768e-06	0.00541564	6.15168e-07	0.00177428	6.45344e-07	0.0015151	2.11963e-07	0.000497635
6500	26	4.72337e-07	0.000995159	1.58785e-07	0.000334541	3.1667e-06	0.00925229	1.03183e-06	0.00301476	2.01062e-06	0.00561067	6.56185e-07	0.0018311	3.63242e-06	0.0105421	1.18285e-06	0.00343292	1.85367e-06	0.00543427	6.07303e-07	0.00178038	6.4471e-07	0.00152155	2.11755e-07	0.000499753
6510	26	4.66925e-07	0.000999862	1.56965e-07	0.000336122	3.16164e-06	0.00928393	1.03019e-06	0.00302507	2.00053e-06	0.00563073	6.52892e-07	0.00183765	3.63647e-06	0.0105785	1.18417e-06	0.00344475	1.85042e-06	0.0054528	6.06236e-07	0.00178646	6.43543e-07	0.00152799	2.11372e-07	0.000501869
6520	26	4.64662e-07	0.00100452	1.56205e-07	0.000337688	3.16054e-06	0.00931555	1.02983e-06	0.00303537	2.00083e-06	0.00565075	6.5299e-07	0.00184418	3.63811e-06	0.0106149	1.1847e-06	0.0034566	1.85796e-06	0.00547135	6.08708e-07	0.00179253	6.42887e-07	0.00153442	2.11157e-07	0.000503982
6530	26	4.66489e-07	0.00100918	1.56819e-07	0.000339254	3.16299e-06	0.00934716	1.03063e-06	0.00304567	2.00453e-06	0.00567077	6.54198e-07	0.00185071	3.63944e-06	0.0106513	1.18514e-06	0.00346845	1.86129e-06	0.00548994	6.098e-07	0.00179862	6.42683e-07	0.00154085	2.11089e-07	0.000506093
6540	26	4.71714e-07	0.00101386	1.58575e-07	0.000340828	3.16634e-06	0.00937881	1.03172e-06	0.00305598	2.00449e-06	0.00569081	6.54184e-07	0.00185725	3.64291e-06	0.0106877	1.18627e-06	0.0034803	1.86375e-06	0.00550857	6.10606e-07	0.00180473	6.42259e-07	0.00154728	2.1095e-07	0.000508204
6550	26	4.69631e-07	0.00101857	1.57875e-07	0.00034241	3.16786e-06	0.00941048	1.03221e-06	0.0030663	1.99068e-06	0.00571079	6.49678e-07	0.00186377	3.64678e-06	0.0107241	1.18753e-06	0.00349217	1.86759e-06	0.00552723	6.11863e-07	0.00181084	6.47637e-07	0.00155373	2.12716e-07	0.000510325
6560	26	4.70659e-07	0.00102327	1.58221e-07	0.000343991	3.16933e-06	0.00944217	1.03269e-06	0.00307663	1.99403e-06	0.00573072	6.50773e-07	0.00187028	3.64416e-06	0.0107606	1.18667e-06	0.00350404	1.86663e-06	0.00554588	6.11549e-07	0.00181695	6.52495e-07	0.00156023	2.14312e-07	0.000512459
6570	26	4.68015e-07	0.00102795	1.57332e-07	0.000345565	3.1703e-06	0.00947386	1.03301e-06	0.00308696	1.99764e-06	0.00575068	6.51952e-07	0.00187679	3.63946e-06	0.010797	1.18514e-06	0.0035159	1.85999e-06	0.00556452	6.09374e-07	0.00182306	6.55815e-07	0.00156677	2.15403e-07	0.000514607
6580	26	4.64425e-07	0.00103263	1.56125e-07	0.000347136	3.16657e-06	0.00950555	1.03179e-06	0.00309728	2.00103e-06	0.00577067	6.53057e-07	0.00188332	3.6348e-06	0.0108334	1.18363e-06	0.00352775	1.8525e-06	0.00558309	6.0692e-07	0.00182914	6.59124e-07	0.00157334	2.1649e-07	0.000516766
6590	26	4.63184e-07	0.00103726	1.55708e-07	0.000348694	3.16919e-06	0.00953724	1.03265e-06	0.0031076	2.00245e-06	0.00579069	6.53519e-07	0.00188985	3.63579e-06	0.0108697	1.18395e-06	0.00353958	1.856e-06	0.00560164	6.08067e-07	0.00183522	6.70225e-07	0.00158	2.20135e-07	0.000518952
6600	26	4.60732e-07	0.00104188	1.54884e-07	0.000350248	3.17248e-06	0.00956894	1.03372e-06	0.00311793	2.00311e-06	0.00581071	6.53737e-07	0.00189638	3.63195e-06	0.010906	1.1827e-06	0.00355141	1.86585e-06	0.00562025	6.11292e-07	0.00184132	6.77157e-07	0.00158672	2.22412e-07	0.00052116
6610	26	4.57971e-07	0.00104648	1.53955e-07	0.000351792	3.16845e-06	0.00960064	1.0324e-06	0.00312826	2.00508e-06	0.00583075	6.54378e-07	0.00190293	3.62312e-06	0.0109423	1.17982e-06	0.00356323	1.87066e-06	0.00563893	6.12868e-07	0.00184744	6.71357e-07	0.00159347	2.20507e-07	0.000523375
6620	26	4.6021e-07	0.00105107	1.54708e-07	0.000353335	3.1628e-06	0.0096323	1.03056e-06	0.00313858	2.01402e-06	0.00585085	6.57295e-07	0.00190948	3.62018e-06	0.0109785	1.17886e-06	0.00357502	1.86426e-06	0.00565761	6.10773e-07	0.00185356	6.67325e-07	0.00160016	2.19183e-07	0.000525573
6630	26	4.64349e-07	0.00105569	1.561e-07	0.000354891	3.15848e-06	0.0096639	1.02916e-06	0.00314888	2.02174e-06	0.00587103	6.59816e-07	0.00191607	3.61019e-06	0.0110147	1.17561e-06	0.00358679	1.8703e-06	0.00567629	6.12752e-07	0.00185968	6.62232e-07	0.0016068	2.17511e-07	0.000527755
6640	26	4.73337e-07	0.0010604	1.59121e-07	0.000356474	3.15331e-06	0.00969545	1.02747e-06	0.00315916	2.02937e-06	0.00589129	6.62304e-07	0.00192268	3.60057e-06	0.0110507	1.17248e-06	0.00359853	1.87158e-06	0.00569499	6.1317e-07	0.0018658	6.65134e-07	0.00161346	2.18463e-07	0.000529942
6650	26	4.83489e-07	0.00106518	1.62534e-07	0.00035808	3.14865e-06	0.00972697	1.02595e-06	0.00316943	2.03703e-06	0.00591162	6.64806e-07	0.00192932	3.59436e-06	0.0110867	1.17046e-06	0.00361024	1.86883e-06	0.00571369	6.12269e-07	0.00187193	6.72324e-07	0.00162015	2.20825e-07	0.000532138
6660	26	4.8499e-07	0.00107002	1.63038e-07	0.000359706	3.1482e-06	0.00975845	1.02581e-06	0.00317969	2.04513e-06	0.00593202	6.6745e-07	0.00193597	3.59982e-06	0.0111227	1.17224e-06	0.00362196	1.86386e-06	0.00573237	6.1064e-07	0.00187805	6.74041e-07	0.00162687	2.21389e-07	0.000534347
6670	26	4.84644e-07	0.00107486	1.62922e-07	0.000361335	3.14972e-06	0.00978995	1.0263e-06	0.00318995	2.04728e-06	0.00595248	6.6815e-07	0.00194265	3.59744e-06	0.0111586	1.17146e-06	0.00363367	1.85867e-06	0.00575097	6.08942e-07	0.00188414	6.83657e-07	0.00163369	2.24547e-07	0.000536586
6680	26	4.84213e-07	0.00107971	1.62777e-07	0.000362964	3.15159e-06	0.00982145	1.02691e-06	0.00320021	2.04605e-06	0.00597294	6.67749e-07	0.00194933	3.59303e-06	0.0111946	1.17003e-06	0.00364538	1.85487e-06	0.00576955	6.07697e-07	0.00189023	6.91872e-07	0.00164054	2.27246e-07	0.000538835
6690	26	4.8221e-07	0.00108454	1.62104e-07	0.000364588	3.15444e-06	0.00985298	1.02784e-06	0.00321049	2.03753e-06	0.00599336	6.64968e-07	0.00195599	3.59134e-06	0.0112305	1.16948e-06	0.00365708	1.85559e-06	0.0057881	6.07931e-07	0.00189631	6.86746e-07	0.00164743	2.25562e-07	0.000541099
6700	26	4.704e-07	0.00108929	1.58134e-07	0.000366186	3.16233e-06	0.00988457	1.03041e-06	0.00322078	2.03227e-06	0.00601371	6.63251e-07	0.00196264	3.59524e-06	0.0112665	1.17075e-06	0.00366878	1.85519e-06	0.00580665	6.07802e-07	0.00190239	6.87351e-07	0.0016543	2.25761e-07	0.000543357
6710	26	4.61537e-07	0.00109395	1.55154e-07	0.000367752	3.16167e-06	0.00991618	1.03019e-06	0.00323108	2.02817e-06	0.00603401	6.61914e-07	0.00196926	3.59821e-06	0.0113024	1.17171e-06	0.00368049	1.86128e-06	0.00582524	6.09796e-07	0.00190848	6.79338e-07	0.00166112	2.23129e-07	0.000545596
6720	26	4.57531e-07	0.00109855	1.53808e-07	0.000369299	3.15639e-06	0.00994778	1.02848e-06	0.00324137	2.02634e-06	0.00605429	6.61316e-07	0.00197588	3.59893e-06	0.0113384	1.17195e-06	0.00369221	1.86669e-06	0.00584387	6.11567e-07	0.00191458	6.69036e-07	0.00166788	2.19745e-07	0.000547815
6730	26	4.57083e-07	0.00110313	1.53657e-07	0.000370836	3.15405e-06	0.00997933	1.02771e-06	0.00325166	2.02873e-06	0.00607456	6.62095e-07	0.00198249	3.59773e-06	0.0113744	1.17156e-06	0.00370393	1.86182e-06	0.00586252	6.09972e-07	0.00192069	6.6687e-07	0.00167456	2.19034e-07	0.000550009
6740	26	4.57296e-07	0.0011077	1.53728e-07	0.000372373	3.14771e-06	0.0100108	1.02565e-06	0.00326192	2.02829e-06	0.00609484	6.61953e-07	0.00198911	3.59979e-06	0.0114104	1.17223e-06	0.00371565	1.86597e-06	0.00588117	6.11332e-07	0.0019268	6.72053e-07	0.00168127	2.20736e-07	0.000552213
6750	26	4.58029e-07	0.00111228	1.53975e-07	0.000373912	3.13935e-06	0.0100423	1.02292e-06	0.00327216	2.02722e-06	0.00611512	6.61603e-07	0.00199573	3.60256e-06	0.0114464	1.17313e-06	0.00372737	1.86924e-06	0.00589984	6.12403e-07	0.00193291	6.77069e-07	0.001688	2.22384e-07	0.000554425
6760	26	4.59098e-07	0.00111686	1.54334e-07	0.000375452	3.12953e-06	0.0100736	1.01972e-06	0.00328238	2.02661e-06	0.00613539	6.61404e-07	0.00200235	3.60511e-06	0.0114824	1.17396e-06	0.00373911	1.86499e-06	0.00591851	6.11011e-07	0.00193903	6.77512e-07	0.00169477	2.22529e-07	0.000556649
6770	26	4.52207e-07	0.00112141	1.52018e-07	0.000376981	3.13802e-06	0.010105	1.02249e-06	0.0032926	2.03228e-06	0.0061557	6.63254e-07	0.00200897	3.60468e-06	0.0115185	1.17382e-06	0.00375085	1.85803e-06	0.00593712	6.08731e-07	0.00194513	6.74111e-07	0.00170153	2.21412e-07	0.000558867
6780	26	4.46238e-07	0.00112589	1.50011e-07	0.00037849	3.14303e-06	0.0101364	1.02412e-06	0.00330283	2.03792e-06	0.00617605	6.65097e-07	0.00201562	3.6099e-06	0.0115546	1.17552e-06	0.0037626	1.85476e-06	0.00595568	6.0766e-07	0.00195121	6.80731e-07	0.00170832	2.23586e-07	0.000561098
6790	26	4.42645e-07	0.00113035	1.48803e-07	0.000379988	3.14588e-06	0.0101678	1.02505e-06	0.00331307	2.04396e-06	0.00619646	6.67067e-07	0.00202228	3.61342e-06	0.0115907	1.17667e-06	0.00377435	1.85428e-06	0.00597423	6.07501e-07	0.00195729	6.89052e-07	0.00171515	2.26319e-07	0.000563341
6800	26	4.45591e-07	0.00113479	1.49793e-07	0.000381482	3.1473e-06	0.0101993	1.02551e-06	0.00332333	2.05134e-06	0.00621694	6.69477e-07	0.00202896	3.60161e-06	0.0116267	1.17282e-06	0.0037861	1.85704e-06	0.00599279	6.08406e-07	0.00196337	6.86222e-07	0.00172202	2.2539e-07	0.000565599
6810	26	4.52722e-07	0.00113929	1.52191e-07	0.000382993	3.15418e-06	0.0102308	1.02776e-06	0.00333359	2.05727e-06	0.00623748	6.71411e-07	0.00203566	3.59518e-06	0.0116627	1.17072e-06	0.00379782	1.85606e-06	0.00601135	6.08086e-07	0.00196945	6.89014e-07	0.00172891	2.26307e-07	0.00056786
6820	26	4.58723e-07	0.00114384	1.54208e-07	0.000384523	3.15475e-06	0.0102623	1.02794e-06	0.00334387	2.06078e-06	0.00625806	6.72558e-07	0.00204238	3.58791e-06	0.0116986	1.16836e-06	0.00380951	1.8595e-06	0.00602994	6.09214e-07	0.00197554	6.96432e-07	0.00173584	2.28743e-07	0.000570136
6830	26	4.59292e-07	0.00114843	1.54399e-07	0.000386065	3.1454e-06	0.0102938	1.02489e-06	0.00335414	2.06378e-06	0.00627869	6.73536e-07	0.00204911	3.57761e-06	0.0117345	1.16501e-06	0.00382118	1.86943e-06	0.00604857	6.12467e-07	0.00198164	7.06365e-07	0.00174284	2.32006e-07	0.000572436
6840	26	4.53208e-07	0.00115299	1.52354e-07	0.000387599	3.14344e-06	0.0103253	1.02425e-06	0.00336438	2.07459e-06	0.00629938	6.77065e-07	0.00205587	3.57479e-06	0.0117702	1.16408e-06	0.00383283	1.8716e-06	0.00606727	6.13177e-07	0.00198777	7.16916e-07	0.00174996	2.35471e-07	0.000574774
6850	26	4.59061e-07	0.00115757	1.54322e-07	0.000389139	3.14568e-06	0.0103567	1.02498e-06	0.00337463	2.07859e-06	0.00632015	6.78368e-07	0.00206265	3.57419e-06	0.011806	1.16389e-06	0.00384447	1.86664e-06	0.00608595	6.11551e-07	0.00199389	7.17678e-07	0.00175713	2.35722e-07	0.00057713
6860	26	4.63577e-07	0.00116216	1.5584e-07	0.000390683	3.14723e-06	0.0103882	1.02549e-06	0.00338488	2.08184e-06	0.00634095	6.79429e-07	0.00206943	3.57282e-06	0.0118417	1.16345e-06	0.0038561	1.86146e-06	0.0061046	6.09855e-07	0.002	7.16045e-07	0.00176429	2.35185e-07	0.000579483
6870	26	4.61397e-07	0.00116679	1.55107e-07	0.000392238	3.14588e-06	0.0104197	1.02505e-06	0.00339513	2.08517e-06	0.00636179	6.80515e-07	0.00207623	3.56894e-06	0.0118774	1.16218e-06	0.00386773	1.85776e-06	0.0061232	6.08643e-07	0.00200609	7.11242e-07	0.00177143	2.33608e-07	0.000581827
6880	26	4.6938e-07	0.00117146	1.57791e-07	0.000393807	3.14944e-06	0.0104511	1.02621e-06	0.00340539	2.07866e-06	0.00638259	6.78393e-07	0.00208302	3.56945e-06	0.0119131	1.16235e-06	0.00387936	1.85914e-06	0.00614179	6.09096e-07	0.00201218	7.07935e-07	0.00177853	2.32521e-07	0.000584158
6890	26	4.79905e-07	0.00117621	1.61329e-07	0.000395405	3.15262e-06	0.0104827	1.02725e-06	0.00341566	2.07138e-06	0.00640334	6.76016e-07	0.0020898	3.56849e-06	0.0119488	1.16203e-06	0.00389098	1.8588e-06	0.00616037	6.08985e-07	0.00201827	7.07891e-07	0.00178562	2.32507e-07	0.000586486
6900	26	4.88903e-07	0.00118105	1.64354e-07	0.000397033	3.15302e-06	0.0105142	1.02738e-06	0.00342593	2.06748e-06	0.00642404	6.74741e-07	0.00209655	3.56339e-06	0.0119845	1.16037e-06	0.00390259	1.85391e-06	0.00617893	6.0738e-07	0.00202435	7.11277e-07	0.00179271	2.33619e-07	0.000588816
6910	26	4.91609e-07	0.00118594	1.65263e-07	0.000398675	3.15403e-06	0.0105457	1.02771e-06	0.00343621	2.05824e-06	0.00644465	6.71726e-07	0.00210328	3.55317e-06	0.01202	1.15704e-06	0.00391417	1.85189e-06	0.00619747	6.0672e-07	0.00203043	7.07685e-07	0.00179978	2.32439e-07	0.00059114
6920	26	4.9095e-07	0.00119085	1.65042e-07	0.000400327	3.15471e-06	0.0105773	1.02793e-06	0.00344648	2.04899e-06	0.0064652	6.68708e-07	0.00210998	3.54191e-06	0.0120555	1.15338e-06	0.00392572	1.85191e-06	0.00621599	6.06727e-07	0.00203649	7.00854e-07	0.00180683	2.30196e-07	0.000593455
6930	26	4.92326e-07	0.00119577	1.65504e-07	0.00040198	3.1526e-06	0.0106088	1.02724e-06	0.00345676	2.05276e-06	0.00648571	6.69939e-07	0.00211668	3.53899e-06	0.0120909	1.15243e-06	0.00393726	1.85289e-06	0.00623451	6.07048e-07	0.00204256	6.983e-07	0.00181384	2.29357e-07	0.000595755
6940	26	5.00154e-07	0.00120074	1.68136e-07	0.00040365	3.1547e-06	0.0106403	1.02792e-06	0.00346704	2.06153e-06	0.00650628	6.72801e-07	0.00212339	3.55239e-06	0.0121264	1.15679e-06	0.00394881	1.86244e-06	0.00625309	6.10177e-07	0.00204865	7.03713e-07	0.00182085	2.31135e-07	0.000598059
6950	26	5.06237e-07	0.00120577	1.70181e-07	0.000405341	3.15828e-06	0.0106719	1.02909e-06	0.00347732	2.06042e-06	0.00652688	6.72438e-07	0.00213011	3.56186e-06	0.012162	1.15988e-06	0.00396039	1.86732e-06	0.00627174	6.11775e-07	0.00205476	7.09472e-07	0.00182792	2.33026e-07	0.00060038
6960	26	5.07692e-07	0.00121083	1.7067e-07	0.000407044	3.16155e-06	0.0107035	1.03016e-06	0.00348762	2.05098e-06	0.00654745	6.69359e-07	0.00213683	3.56264e-06	0.0121976	1.16013e-06	0.00397199	1.86653e-06	0.00629041	6.11515e-07	0.00206088	7.13591e-07	0.00183503	2.34379e-07	0.000602716
6970	26	5.0369e-07	0.00121589	1.69325e-07	0.000408742	3.16527e-06	0.0107351	1.03137e-06	0.00349793	2.04443e-06	0.00656792	6.67219e-07	0.00214351	3.56044e-06	0.0122332	1.15941e-06	0.00398358	1.87118e-06	0.0063091	6.13038e-07	0.002067	7.19274e-07	0.0018422	2.36246e-07	0.000605071
6980	26	5.05612e-07	0.00122094	1.69971e-07	0.000410441	3.16508e-06	0.0107668	1.03131e-06	0.00350824	2.04894e-06	0.0065884	6.68692e-07	0.00215019	3.55957e-06	0.0122688	1.15913e-06	0.00399518	1.87505e-06	0.00632783	6.14308e-07	0.00207314	7.18781e-07	0.00184938	2.36084e-07	0.00060743
6990	26	5.06802e-07	0.001226	1.70371e-07	0.000412141	3.15551e-06	0.0107984	1.02819e-06	0.00351853	2.06068e-06	0.00660896	6.72524e-07	0.0021569	3.55419e-06	0.0123043	1.15738e-06	0.00400676	1.87435e-06	0.00634657	6.14079e-07	0.00207928	7.18406e-07	0.00185657	2.35961e-07	0.000609792
7000	26	5.04872e-07	0.00123106	1.69722e-07	0.000413843	3.13987e-06	0.0108299	1.02309e-06	0.0035288	2.07339e-06	0.0066296	6.76671e-07	0.00216364	3.54443e-06	0.0123399	1.1542e-06	0.00401832	1.87036e-06	0.00636531	6.1277e-07	0.00208541	7.20918e-07	0.00186376	2.36786e-07	0.000612154
7010	26	5.08439e-07	0.00123613	1.70921e-07	0.000415548	3.13114e-06	0.0108612	1.02025e-06	0.00353901	2.07865e-06	0.00665036	6.78389e-07	0.00217041	3.53741e-06	0.0123753	1.15191e-06	0.00402985	1.87474e-06	0.00638404	6.14204e-07	0.00209155	7.23359e-07	0.00187099	2.37588e-07	0.000614527
7020	26	5.10709e-07	0.00124123	1.71684e-07	0.000417261	3.13465e-06	0.0108926	1.02139e-06	0.00354922	2.08218e-06	0.00667117	6.79542e-07	0.0021772	3.53801e-06	0.0124106	1.15211e-06	0.00404137	1.87819e-06	0.0064028	6.15335e-07	0.0020977	7.30268e-07	0.00187826	2.39857e-07	0.000616915
7030	26	5.07844e-07	0.00124631	1.70721e-07	0.00041897	3.14372e-06	0.010924	1.02435e-06	0.00355945	2.0873e-06	0.00669202	6.81212e-07	0.00218401	3.53796e-06	0.012446	1.15209e-06	0.00405289	1.87262e-06	0.00642154	6.13512e-07	0.00210384	7.28399e-07	0.00188554	2.39243e-07	0.000619306
7040	26	5.01372e-07	0.00125136	1.68545e-07	0.000420668	3.15236e-06	0.0109554	1.02716e-06	0.00356971	2.09155e-06	0.00671291	6.82598e-07	0.00219083	3.53637e-06	0.0124814	1.15158e-06	0.00406441	1.86287e-06	0.00644023	6.10317e-07	0.00210996	7.18778e-07	0.00189278	2.36083e-07	0.000621685
7050	26	4.95153e-07	0.00125635	1.66455e-07	0.000422345	3.15643e-06	0.010987	1.02849e-06	0.00357999	2.08661e-06	0.0067338	6.80985e-07	0.00219764	3.53889e-06	0.0125168	1.1524e-06	0.00407593	1.86246e-06	0.00645886	6.10182e-07	0.00211606	7.10789e-07	0.00189994	2.33459e-07	0.000624035
7060	26	4.99045e-07	0.00126133	1.67763e-07	0.000424018	3.14788e-06	0.0110185	1.0257e-06	0.00359025	2.07863e-06	0.00675462	6.78381e-07	0.00220444	3.53919e-06	0.0125522	1.15249e-06	0.00408745	1.86323e-06	0.00647749	6.10435e-07	0.00212217	7.02775e-07	0.001907	2.30827e-07	0.000626354
7070	26	5.08346e-07	0.00126637	1.7089e-07	0.000425714	3.14293e-06	0.0110499	1.02409e-06	0.0036005	2.07814e-06	0.00677542	6.78223e-07	0.00221123	3.53608e-06	0.0125875	1.15148e-06	0.00409897	1.85874e-06	0.00649609	6.08965e-07	0.00212826	7.06095e-07	0.00191405	2.31917e-07	0.000628672
7080	26	5.16925e-07	0.00127149	1.73774e-07	0.000427435	3.14271e-06	0.0110814	1.02402e-06	0.00361074	2.08153e-06	0.00679621	6.79328e-07	0.00221801	3.52948e-06	0.0126229	1.14933e-06	0.00411048	1.85484e-06	0.00651467	6.07686e-07	0.00213435	7.15619e-07	0.00192116	2.35045e-07	0.000631007
7090	26	5.19403e-07	0.00127667	1.74607e-07	0.000429177	3.1411e-06	0.0111128	1.02349e-06	0.00362098	2.08006e-06	0.00681701	6.78848e-07	0.0022248	3.52234e-06	0.0126581	1.14701e-06	0.00412196	1.85897e-06	0.00653324	6.09038e-07	0.00214043	7.24342e-07	0.00192837	2.3791e-07	0.000633374
7100	26	5.16347e-07	0.00128184	1.7358e-07	0.000430915	3.13572e-06	0.0111442	1.02174e-06	0.0036312	2.07395e-06	0.00683777	6.76855e-07	0.00223158	3.51931e-06	0.0126933	1.14602e-06	0.00413342	1.86006e-06	0.00655183	6.09398e-07	0.00214652	7.31896e-07	0.00193565	2.40392e-07	0.000635766
7110	26	5.1273e-07	0.001287	1.72364e-07	0.00043265	3.12894e-06	0.0111755	1.01953e-06	0.00364142	2.06729e-06	0.0068585	6.74681e-07	0.00223834	3.51675e-06	0.0127285	1.14518e-06	0.00414488	1.86089e-06	0.00657044	6.09667e-07	0.00215262	7.37471e-07	0.00194298	2.42223e-07	0.000638173
7120	26	5.16855e-07	0.00129216	1.7375e-07	0.000434382	3.12326e-06	0.0112068	1.01768e-06	0.0036516	2.06676e-06	0.00687917	6.74508e-07	0.00224509	3.51662e-06	0.0127637	1.14514e-06	0.00415633	1.86661e-06	0.00658908	6.11543e-07	0.00215873	7.37201e-07	0.00195035	2.42134e-07	0.000640595
7130	26	5.16834e-07	0.00129732	1.73743e-07	0.000436118	3.11852e-06	0.011238	1.01613e-06	0.00366177	2.06644e-06	0.00689984	6.74404e-07	0.00225183	3.52304e-06	0.0127989	1.14724e-06	0.00416779	1.86772e-06	0.00660775	6.11906e-07	0.00216484	7.4307e-07	0.00195777	2.44062e-07	0.00064303
7140	26	5.12453e-07	0.00130246	1.72271e-07	0.000437847	3.11542e-06	0.0112691	1.01512e-06	0.00367193	2.06782e-06	0.00692051	6.74854e-07	0.00225858	3.5325e-06	0.0128342	1.15032e-06	0.00417928	1.86917e-06	0.00662644	6.12382e-07	0.00217097	7.50757e-07	0.00196522	2.46586e-07	0.000645478
7150	26	5.02095e-07	0.00130753	1.68788e-07	0.000439551	3.11662e-06	0.0113003	1.01552e-06	0.00368208	2.07381e-06	0.00694122	6.76809e-07	0.00226534	3.53333e-06	0.0128695	1.15058e-06	0.00419079	1.87999e-06	0.00664519	6.15925e-07	0.00217711	7.52102e-07	0.00197273	2.47028e-07	0.000647945
7160	26	4.99942e-07	0.00131255	1.68065e-07	0.000441238	3.12447e-06	0.0113315	1.01807e-06	0.00369225	2.07367e-06	0.00696196	6.76762e-07	0.0022721	3.52906e-06	0.0129048	1.14919e-06	0.00420228	1.88923e-06	0.00666403	6.18954e-07	0.00218328	7.41325e-07	0.00198019	2.43488e-07	0.000650395
7170	26	5.02071e-07	0.00131756	1.6878e-07	0.000442923	3.12896e-06	0.0113628	1.01954e-06	0.00370244	2.07264e-06	0.00698269	6.76426e-07	0.00227887	3.52137e-06	0.01294	1.14669e-06	0.00421376	1.89424e-06	0.00668295	6.20594e-07	0.00218948	7.24278e-07	0.00198753	2.37889e-07	0.000652805
7180	26	5.04841e-07	0.0013226	1.69712e-07	0.000444615	3.12364e-06	0.011394	1.0178e-06	0.00371262	2.07261e-06	0.00700342	6.76417e-07	0.00228564	3.51624e-06	0.0129752	1.14502e-06	0.00422522	1.89522e-06	0.00670189	6.20915e-07	0.00219569	7.10956e-07	0.00199471	2.33514e-07	0.000655164
7190	26	5.08102e-07	0.00132767	1.70808e-07	0.000446319	3.11535e-06	0.0114252	1.0151e-06	0.00372279	2.07124e-06	0.00702413	6.7597e-07	0.0022924	3.51961e-06	0.0130104	1.14612e-06	0.00423668	1.89256e-06	0.00672082	6.20043e-07	0.00220189	7.08445e-07	0.00200181	2.32689e-07	0.000657495
7200	26	5.09363e-07	0.00133274	1.71232e-07	0.000448025	3.1133e-06	0.0114564	1.01444e-06	0.00373293	2.07073e-06	0.00704485	6.75803e-07	0.00229916	3.51783e-06	0.0130456	1.14554e-06	0.00424813	1.89057e-06	0.00673975	6.19393e-07	0.00220809	7.10326e-07	0.0020089	2.33307e-07	0.000659825
7210	26	5.03393e-07	0.00133779	1.69225e-07	0.000449723	3.10859e-06	0.0114875	1.0129e-06	0.00374307	2.07485e-06	0.00706558	6.77149e-07	0.00230592	3.51319e-06	0.0130808	1.14403e-06	0.00425958	1.89189e-06	0.00675866	6.19824e-07	0.00221428	7.20286e-07	0.00201607	2.36578e-07	0.00066218
7220	26	4.98337e-07	0.00134281	1.67525e-07	0.00045141	3.10113e-06	0.0115185	1.01047e-06	0.00375319	2.0798e-06	0.00708635	6.78764e-07	0.0023127	3.50789e-06	0.0131159	1.1423e-06	0.00427102	1.88502e-06	0.00677754	6.17574e-07	0.00222047	7.2874e-07	0.00202331	2.39355e-07	0.000664555
7230	26	4.94573e-07	0.00134778	1.6626e-07	0.000453079	3.09815e-06	0.0115495	1.0095e-06	0.00376329	2.08053e-06	0.00710715	6.79003e-07	0.00231949	3.50556e-06	0.0131509	1.14154e-06	0.00428244	1.878e-06	0.00679636	6.15274e-07	0.00222664	7.27162e-07	0.00203058	2.38837e-07	0.000666945
7240	26	4.96483e-07	0.00135274	1.66902e-07	0.000454748	3.09567e-06	0.0115805	1.00869e-06	0.00377338	2.08465e-06	0.00712798	6.80347e-07	0.00232629	3.50722e-06	0.013186	1.14208e-06	0.00429385	1.87765e-06	0.00681514	6.15158e-07	0.00223279	7.27812e-07	0.00203786	2.3905e-07	0.000669337
7250	26	4.97634e-07	0.0013577	1.67289e-07	0.000456417	3.09434e-06	0.0116115	1.00826e-06	0.00378346	2.09564e-06	0.00714887	6.83934e-07	0.00233311	3.51197e-06	0.0132211	1.14363e-06	0.00430528	1.89131e-06	0.00683398	6.19635e-07	0.00223896	7.37933e-07	0.00204519	2.42374e-07	0.000671743
7260	26	4.94125e-07	0.00136266	1.66109e-07	0.000458085	3.0957e-06	0.0116424	1.0087e-06	0.00379355	2.09799e-06	0.00716984	6.84701e-07	0.00233995	3.51323e-06	0.0132562	1.14404e-06	0.00431672	1.90473e-06	0.00685296	6.24031e-07	0.00224518	7.44766e-07	0.0020526	2.44619e-07	0.000674179
7270	26	4.89639e-07	0.00136758	1.64601e-07	0.000459736	3.10204e-06	0.0116734	1.01077e-06	0.00380365	2.10284e-06	0.00719086	6.86283e-07	0.00234681	3.51326e-06	0.0132913	1.14405e-06	0.00432816	1.89979e-06	0.00687197	6.22412e-07	0.00225141	7.43543e-07	0.00206003	2.44217e-07	0.000676619
7280	26	4.86771e-07	0.00137246	1.63637e-07	0.000461379	3.11427e-06	0.0117045	1.01475e-06	0.00381377	2.11021e-06	0.00721192	6.88689e-07	0.00235368	3.51334e-06	0.0133265	1.14408e-06	0.0043396	1.89241e-06	0.00689093	6.19996e-07	0.00225762	7.37189e-07	0.00206744	2.4213e-07	0.000679051
7290	26	4.86416e-07	0.00137733	1.63518e-07	0.000463015	3.1155e-06	0.0117356	1.01515e-06	0.00382392	2.11843e-06	0.00723306	6.91371e-07	0.00236058	3.51597e-06	0.0133616	1.14493e-06	0.00435105	1.88634e-06	0.00690983	6.18005e-07	0.00226381	7.28839e-07	0.00207477	2.39387e-07	0.00068146
7300	26	4.87118e-07	0.0013822	1.63754e-07	0.000464652	3.11339e-06	0.0117668	1.01447e-06	0.00383407	2.10817e-06	0.0072542	6.88022e-07	0.00236748	3.52513e-06	0.0133968	1.14791e-06	0.00436251	1.87975e-06	0.00692867	6.15848e-07	0.00226998	7.3363e-07	0.00208208	2.40961e-07	0.00068386
7310	26	4.87374e-07	0.00138707	1.6384e-07	0.000466289	3.11856e-06	0.0117979	1.01615e-06	0.00384423	2.10681e-06	0.00727527	6.87578e-07	0.00237436	3.52467e-06	0.0134321	1.14777e-06	0.00437398	1.87953e-06	0.00694747	6.15774e-07	0.00227614	7.30674e-07	0.00208939	2.3999e-07	0.000686262
7320	26	4.87135e-07	0.00139194	1.63759e-07	0.000467927	3.11927e-06	0.0118291	1.01638e-06	0.00385439	2.10402e-06	0.00729633	6.86669e-07	0.00238123	3.52402e-06	0.0134673	1.14755e-06	0.00438546	1.88314e-06	0.00696628	6.16957e-07	0.00228231	7.30967e-07	0.00209671	2.40086e-07	0.000688665
7330	26	4.86564e-07	0.00139681	1.63567e-07	0.000469564	3.11267e-06	0.0118603	1.01423e-06	0.00386454	2.09909e-06	0.00731734	6.85058e-07	0.00238809	3.52419e-06	0.0135026	1.14761e-06	0.00439694	1.88887e-06	0.00698513	6.18833e-07	0.00228848	7.3418e-07	0.00210403	2.41142e-07	0.00069107
7340	26	4.83415e-07	0.00140165	1.62509e-07	0.000471192	3.10775e-06	0.0118914	1.01263e-06	0.00387468	2.09042e-06	0.00733829	6.8223e-07	0.00239493	3.53012e-06	0.0135378	1.14954e-06	0.00440842	1.88411e-06	0.007004	6.17274e-07	0.00229466	7.34506e-07	0.00211137	2.41249e-07	0.000693482
7350	26	4.77027e-07	0.00140646	1.60361e-07	0.000472808	3.0987e-06	0.0119224	1.00968e-06	0.00388478	2.09819e-06	0.00735927	6.84767e-07	0.00240177	3.52288e-06	0.0135731	1.14718e-06	0.0044199	1.88452e-06	0.00702285	6.1741e-07	0.00230084	7.29198e-07	0.00211867	2.39505e-07	0.000695879
7360	26	4.73927e-07	0.00141121	1.59319e-07	0.000474406	3.09014e-06	0.0119534	1.00689e-06	0.00389487	2.10991e-06	0.0073803	6.88591e-07	0.00240864	3.51355e-06	0.0136083	1.14414e-06	0.00443136	1.88662e-06	0.0070417	6.18099e-07	0.00230702	7.21835e-07	0.00212593	2.37087e-07	0.000698264
7370	26	4.71554e-07	0.00141594	1.58522e-07	0.000475995	3.08804e-06	0.0119842	1.0062e-06	0.00390493	2.12441e-06	0.00740149	6.93324e-07	0.00241555	3.50728e-06	0.0136434	1.1421e-06	0.00444279	1.8912e-06	0.0070606	6.19598e-07	0.00231321	7.09946e-07	0.00213307	2.33182e-07	0.000700609
7380	26	4.68058e-07	0.00142064	1.57346e-07	0.000477573	3.08727e-06	0.0120151	1.00595e-06	0.003915	2.13051e-06	0.00742272	6.95315e-07	0.00242248	3.50597e-06	0.0136784	1.14168e-06	0.00445421	1.89389e-06	0.00707951	6.2048e-07	0.0023194	6.97876e-07	0.00214014	2.29218e-07	0.00070293
7390	26	4.63089e-07	0.00142529	1.55676e-07	0.000479138	3.08651e-06	0.012046	1.00571e-06	0.00392505	2.11865e-06	0.00744397	6.91443e-07	0.00242942	3.51488e-06	0.0137135	1.14458e-06	0.00446564	1.89048e-06	0.00709843	6.19363e-07	0.0023256	6.86377e-07	0.00214706	2.25441e-07	0.000705204
7400	26	4.54872e-07	0.00142987	1.52913e-07	0.000480678	3.08027e-06	0.0120768	1.00367e-06	0.0039351	2.11603e-06	0.00746515	6.90588e-07	0.00243633	3.52349e-06	0.0137487	1.14738e-06	0.0044771	1.88095e-06	0.00711729	6.1624e-07	0.00233178	6.75072e-07	0.00215387	2.21728e-07	0.00070744
7410	26	4.51729e-07	0.00143443	1.51857e-07	0.000482209	3.08445e-06	0.0121077	1.00503e-06	0.00394515	2.12056e-06	0.00748634	6.92065e-07	0.00244324	3.51685e-06	0.0137839	1.14522e-06	0.00448856	1.88704e-06	0.00713614	6.18236e-07	0.00233795	6.86278e-07	0.00216069	2.25408e-07	0.00070968
7420	26	4.53803e-07	0.00143895	1.52554e-07	0.00048373	3.0826e-06	0.0121385	1.00443e-06	0.00395519	2.11509e-06	0.0075075	6.90281e-07	0.00245015	3.49813e-06	0.013819	1.13912e-06	0.00449998	1.88757e-06	0.007155	6.18408e-07	0.00234413	6.94382e-07	0.00216758	2.2807e-07	0.000711943
7430	26	4.48963e-07	0.00144346	1.50927e-07	0.000485246	3.07316e-06	0.0121693	1.00136e-06	0.00396522	2.10393e-06	0.00752861	6.86639e-07	0.00245704	3.47741e-06	0.0138539	1.13237e-06	0.00451135	1.88273e-06	0.00717386	6.16823e-07	0.00235031	6.94074e-07	0.00217452	2.27969e-07	0.000714222
7440	26	4.51869e-07	0.00144799	1.51904e-07	0.000486768	3.06351e-06	0.0122	9.98211e-07	0.00397522	2.10556e-06	0.00754966	6.87171e-07	0.00246391	3.47306e-06	0.0138886	1.13096e-06	0.00452266	1.88599e-06	0.00719271	6.17892e-07	0.00235649	6.90398e-07	0.00218144	2.26761e-07	0.000716494
7450	26	4.59124e-07	0.00145252	1.54343e-07	0.000488292	3.05339e-06	0.0122305	9.94913e-07	0.00398519	2.11213e-06	0.00757076	6.89317e-07	0.0024708	3.4682e-06	0.0139233	1.12938e-06	0.00453396	1.88644e-06	0.00721156	6.1804e-07	0.00236266	6.9e-07	0.00218835	2.26631e-07	0.000718764
7460	26	4.60279e-07	0.00145712	1.54731e-07	0.000489837	3.05763e-06	0.0122611	9.96295e-07	0.00399515	2.12334e-06	0.00759192	6.92975e-07	0.0024777	3.46297e-06	0.013958	1.12767e-06	0.00454525	1.88403e-06	0.00723041	6.17248e-07	0.00236884	6.92721e-07	0.00219526	2.27525e-07	0.000721034
7470	26	4.56633e-07	0.00146169	1.53505e-07	0.000491375	3.06291e-06	0.0122917	9.98015e-07	0.00400512	2.12387e-06	0.00761315	6.93147e-07	0.00248463	3.46627e-06	0.0139927	1.12875e-06	0.00455654	1.87177e-06	0.00724917	6.13231e-07	0.00237499	6.91763e-07	0.00220218	2.2721e-07	0.000723306
7480	26	4.49423e-07	0.00146622	1.51082e-07	0.000492895	3.06973e-06	0.0123224	1.00024e-06	0.00401511	2.11999e-06	0.00763436	6.91879e-07	0.00249155	3.46831e-06	0.0140273	1.12941e-06	0.00456783	1.86652e-06	0.00726788	6.11511e-07	0.00238112	6.92524e-07	0.0022091	2.2746e-07	0.000725581
7490	26	4.38856e-07	0.00147068	1.47529e-07	0.000494395	3.0795e-06	0.0123531	1.00342e-06	0.00402512	2.1127e-06	0.00765554	6.89502e-07	0.00249846	3.46765e-06	0.014062	1.1292e-06	0.00457912	1.87068e-06	0.00728656	6.12876e-07	0.00238724	6.95785e-07	0.00221604	2.28531e-07	0.000727859
7500	26	4.46252e-07	0.00147512	1.50016e-07	0.000495889	3.07026e-06	0.0123838	1.00041e-06	0.00403513	2.10366e-06	0.00767661	6.86552e-07	0.00250534	3.45539e-06	0.0140966	1.1252e-06	0.00459038	1.85968e-06	0.00730519	6.09272e-07	0.00239334	6.87165e-07	0.00222294	2.25699e-07	0.000730125
7510	26	4.54223e-07	0.00147962	1.52695e-07	0.000497402	3.05898e-06	0.0124145	9.96736e-07	0.00404512	2.09545e-06	0.0076976	6.8387e-07	0.00251219	3.4485e-06	0.0141311	1.12296e-06	0.00460163	1.84729e-06	0.00732373	6.05213e-07	0.00239941	6.80084e-07	0.00222978	2.23374e-07	0.000732371
7520	26	4.5706e-07	0.00148417	1.53649e-07	0.000498931	3.04578e-06	0.012445	9.92435e-07	0.00405507	2.09441e-06	0.00771856	6.83533e-07	0.00251903	3.44682e-06	0.0141656	1.12241e-06	0.00461285	1.8424e-06	0.00734219	6.0361e-07	0.00240546	6.72083e-07	0.00223653	2.20746e-07	0.00073459
7530	26	4.52829e-07	0.00148872	1.52227e-07	0.000500461	3.04455e-06	0.0124755	9.92033e-07	0.004065	2.10069e-06	0.00773953	6.85581e-07	0.00252587	3.44611e-06	0.0142001	1.12218e-06	0.00462408	1.84663e-06	0.00736062	6.04998e-07	0.0024115	6.62575e-07	0.00224322	2.17623e-07	0.000736785
7540	26	4.46315e-07	0.00149321	1.50037e-07	0.000501968	3.04672e-06	0.0125059	9.92741e-07	0.00407492	2.09374e-06	0.00776048	6.83314e-07	0.00253271	3.44259e-06	0.0142345	1.12104e-06	0.00463529	1.8394e-06	0.00737904	6.02628e-07	0.00241753	6.66233e-07	0.00224986	2.18824e-07	0.000738967
7550	26	4.37665e-07	0.00149764	1.47129e-07	0.000503459	3.04946e-06	0.0125364	9.93634e-07	0.00408485	2.08808e-06	0.00778141	6.81468e-07	0.00253954	3.43754e-06	0.0142689	1.11939e-06	0.0046465	1.83429e-06	0.00739742	6.00953e-07	0.00242356	6.70206e-07	0.00225655	2.20129e-07	0.000741164
7560	26	4.27945e-07	0.00150197	1.43861e-07	0.000504914	3.05056e-06	0.0125669	9.93991e-07	0.00409479	2.08826e-06	0.0078023	6.81525e-07	0.00254636	3.43306e-06	0.0143033	1.11793e-06	0.00465768	1.83659e-06	0.00741578	6.01708e-07	0.00242957	6.72599e-07	0.00226326	2.20915e-07	0.000743368
7570	26	4.25376e-07	0.00150623	1.42998e-07	0.000506347	3.04645e-06	0.0125974	9.92652e-07	0.00410472	2.08854e-06	0.00782318	6.81615e-07	0.00255317	3.4346e-06	0.0143376	1.11844e-06	0.00466887	1.83928e-06	0.00743416	6.02588e-07	0.00243559	6.72166e-07	0.00226998	2.20773e-07	0.000745576
7580	26	4.32943e-07	0.00151054	1.45542e-07	0.000507795	3.03519e-06	0.0126278	9.88982e-07	0.00411462	2.08662e-06	0.00784405	6.8099e-07	0.00255999	3.43146e-06	0.0143719	1.11741e-06	0.00468004	1.83282e-06	0.00745251	6.00472e-07	0.0024416	6.66744e-07	0.00227667	2.18992e-07	0.000747773
7590	26	4.43446e-07	0.00151491	1.49072e-07	0.000509266	3.02307e-06	0.0126581	9.85035e-07	0.0041245	2.08398e-06	0.00786491	6.80129e-07	0.00256679	3.42567e-06	0.0144062	1.11552e-06	0.00469121	1.82157e-06	0.00747078	5.96785e-07	0.00244759	6.58964e-07	0.00228329	2.16437e-07	0.000749948
7600	26	4.47722e-07	0.00151937	1.5051e-07	0.000510763	3.0175e-06	0.0126883	9.8322e-07	0.00413434	2.08254e-06	0.00788574	6.79656e-07	0.00257359	3.42048e-06	0.0144405	1.11383e-06	0.00470235	1.81214e-06	0.00748895	5.93697e-07	0.00245354	6.51022e-07	0.00228985	2.13828e-07	0.000752102
7610	26	4.50164e-07	0.00152385	1.51331e-07	0.000512271	3.01414e-06	0.0127184	9.82126e-07	0.00414417	2.07822e-06	0.00790653	6.78247e-07	0.00258038	3.40912e-06	0.0144746	1.11014e-06	0.00471347	1.8052e-06	0.00750704	5.91422e-07	0.00245947	6.48459e-07	0.00229636	2.12987e-07	0.00075424
7620	26	4.5143e-07	0.00152836	1.51757e-07	0.000513786	3.01217e-06	0.0127486	9.81482e-07	0.00415398	2.07099e-06	0.00792728	6.75888e-07	0.00258715	3.39173e-06	0.0145086	1.10447e-06	0.00472454	1.80072e-06	0.00752508	5.89954e-07	0.00246538	6.48971e-07	0.00230285	2.13155e-07	0.00075637
7630	26	4.5034e-07	0.00153286	1.5139e-07	0.000515301	3.00925e-06	0.0127787	9.80531e-07	0.00416379	2.068e-06	0.00794798	6.74913e-07	0.00259391	3.38188e-06	0.0145425	1.10127e-06	0.00473558	1.80054e-06	0.00754309	5.89897e-07	0.00247128	6.49356e-07	0.00230934	2.13281e-07	0.000758502
7640	26	4.45438e-07	0.00153734	1.49742e-07	0.000516805	3.00701e-06	0.0128088	9.79802e-07	0.0041736	2.06297e-06	0.00796863	6.73273e-07	0.00260064	3.37617e-06	0.0145763	1.09941e-06	0.00474658	1.79848e-06	0.00756108	5.8922e-07	0.00247717	6.43253e-07	0.00231579	2.11277e-07	0.000760621
7650	26	4.41394e-07	0.00154178	1.48383e-07	0.000518297	3.00428e-06	0.0128388	9.78911e-07	0.00418339	2.05493e-06	0.00798923	6.70646e-07	0.00260736	3.36746e-06	0.01461	1.09657e-06	0.00475756	1.79202e-06	0.00757903	5.87106e-07	0.00248306	6.36358e-07	0.0023222	2.09012e-07	0.000762726
7660	26	4.49413e-07	0.00154622	1.51078e-07	0.000519792	2.99603e-06	0.0128688	9.76225e-07	0.00419317	2.05509e-06	0.00800978	6.70701e-07	0.00261407	3.34875e-06	0.0146436	1.09048e-06	0.0047685	1.78937e-06	0.00759694	5.86238e-07	0.00248892	6.34397e-07	0.00232855	2.08368e-07	0.000764812
7670	26	4.41677e-07	0.00155068	1.48478e-07	0.000521289	2.99644e-06	0.0128988	9.76357e-07	0.00420293	2.05321e-06	0.00803032	6.70087e-07	0.00262078	3.33448e-06	0.014677	1.08583e-06	0.00477938	1.78607e-06	0.00761482	5.85154e-07	0.00249478	6.21276e-07	0.00233482	2.04058e-07	0.000766873
7680	26	4.38133e-07	0.00155508	1.47287e-07	0.000522767	2.98778e-06	0.0129287	9.73534e-07	0.00421267	2.04751e-06	0.00805081	6.68227e-07	0.00262746	3.32946e-06	0.0147103	1.0842e-06	0.00479023	1.78351e-06	0.00763266	5.84318e-07	0.00250063	6.05154e-07	0.00234092	1.98763e-07	0.000768876
7690	26	4.37416e-07	0.00155946	1.47045e-07	0.000524241	2.9784e-06	0.0129585	9.70478e-07	0.0042224	2.04233e-06	0.00807127	6.66534e-07	0.00263414	3.32437e-06	0.0147436	1.08254e-06	0.00480106	1.78079e-06	0.00765049	5.83426e-07	0.00250647	5.94955e-07	0.00234696	1.95413e-07	0.000770859
7700	26	4.40293e-07	0.00156385	1.48013e-07	0.000525716	2.97281e-06	0.0129883	9.68659e-07	0.00423209	2.04028e-06	0.00809168	6.65867e-07	0.0026408	3.31441e-06	0.0147768	1.0793e-06	0.00481187	1.77714e-06	0.00766828	5.8223e-07	0.00251229	6.01142e-07	0.00235294	1.97445e-07	0.000772823
7710	26	4.44468e-07	0.00156827	1.49416e-07	0.000527204	2.96912e-06	0.013018	9.67454e-07	0.00424178	2.03963e-06	0.00811208	6.65655e-07	0.00264746	3.3073e-06	0.0148099	1.07698e-06	0.00482266	1.77941e-06	0.00768607	5.82973e-07	0.00251812	6.13508e-07	0.00235902	2.01507e-07	0.00077482
7720	26	4.49017e-07	0.00157274	1.50945e-07	0.000528706	2.96575e-06	0.0130477	9.66356e-07	0.00425144	2.03656e-06	0.00813246	6.64652e-07	0.00265411	3.30157e-06	0.0148429	1.07512e-06	0.00483342	1.77858e-06	0.00770385	5.82703e-07	0.00252395	6.21364e-07	0.00236519	2.04087e-07	0.000776847
7730	26	4.52229e-07	0.00157725	1.52025e-07	0.00053022	2.96142e-06	0.0130773	9.64947e-07	0.0042611	2.03075e-06	0.00815279	6.62755e-07	0.00266075	3.29294e-06	0.0148759	1.0723e-06	0.00484415	1.77337e-06	0.0077216	5.80993e-07	0.00252977	6.20703e-07	0.00237139	2.0387e-07	0.000778883
7740	26	4.53495e-07	0.00158177	1.52451e-07	0.000531742	2.95591e-06	0.0131069	9.63151e-07	0.00427074	2.02394e-06	0.00817307	6.60532e-07	0.00266736	3.27949e-06	0.0149088	1.06793e-06	0.00485485	1.76669e-06	0.00773931	5.78807e-07	0.00253557	6.14258e-07	0.00237757	2.01753e-07	0.000780912
7750	26	4.49036e-07	0.00158627	1.50952e-07	0.000533255	2.95714e-06	0.0131365	9.63551e-07	0.00428038	2.02047e-06	0.00819329	6.594e-07	0.00267396	3.26778e-06	0.0149415	1.06411e-06	0.00486551	1.76424e-06	0.00775697	5.78003e-07	0.00254135	6.12861e-07	0.00238371	2.01294e-07	0.00078293
7760	26	4.43471e-07	0.00159074	1.49081e-07	0.000534758	2.95904e-06	0.0131661	9.64169e-07	0.00429001	2.01722e-06	0.00821348	6.58342e-07	0.00268055	3.26033e-06	0.0149742	1.06168e-06	0.00487614	1.76217e-06	0.0077746	5.77324e-07	0.00254713	6.10901e-07	0.00238982	2.00651e-07	0.000784938
7770	26	4.41947e-07	0.00159517	1.48568e-07	0.000536246	2.95343e-06	0.0131956	9.62344e-07	0.00429964	2.01014e-06	0.00823361	6.56028e-07	0.00268712	3.26389e-06	0.0150068	1.06285e-06	0.00488677	1.75598e-06	0.00779218	5.75297e-07	0.00255289	6.0107e-07	0.00239588	1.97422e-07	0.000786926
7780	26	4.3855e-07	0.00159957	1.47427e-07	0.000537726	2.94456e-06	0.0132251	9.59454e-07	0.00430925	2.00345e-06	0.00825368	6.53845e-07	0.00269367	3.26491e-06	0.0150394	1.06318e-06	0.0048974	1.75384e-06	0.00780974	5.74595e-07	0.00255864	5.99448e-07	0.00240189	1.96889e-07	0.000788901
7790	26	4.37701e-07	0.00160396	1.47141e-07	0.0005392	2.94042e-06	0.0132545	9.58105e-07	0.00431885	1.99931e-06	0.0082737	6.52497e-07	0.00270021	3.26395e-06	0.0150721	1.06287e-06	0.00490803	1.74875e-06	0.00782725	5.72929e-07	0.00256438	5.96113e-07	0.00240786	1.95793e-07	0.000790862
7800	26	4.46219e-07	0.00160838	1.50005e-07	0.000540687	2.94481e-06	0.013284	9.59536e-07	0.00432843	1.99953e-06	0.0082937	6.52568e-07	0.00270673	3.25925e-06	0.0151047	1.06133e-06	0.00491865	1.73923e-06	0.0078447	5.69809e-07	0.00257009	5.85557e-07	0.00241377	1.92326e-07	0.000792805
7810	26	4.60402e-07	0.0016129	1.54773e-07	0.000542205	2.94437e-06	0.0133134	9.59391e-07	0.00433803	2.00066e-06	0.0083137	6.52937e-07	0.00271326	3.24654e-06	0.0151372	1.05719e-06	0.00492925	1.74131e-06	0.0078621	5.70491e-07	0.00257579	5.85315e-07	0.00241963	1.92247e-07	0.000794728
7820	26	4.49748e-07	0.00161744	1.51191e-07	0.000543731	2.9463e-06	0.0133429	9.6002e-07	0.00434763	1.99173e-06	0.00833365	6.5002e-07	0.00271977	3.24961e-06	0.0151697	1.0582e-06	0.00493982	1.74052e-06	0.0078795	5.70233e-07	0.0025815	5.88813e-07	0.0024255	1.93396e-07	0.000796657
7830	26	4.44832e-07	0.00162191	1.49539e-07	0.000545235	2.9395e-06	0.0133723	9.57802e-07	0.0043572	1.98688e-06	0.00835354	6.48437e-07	0.00272626	3.24031e-06	0.0152021	1.05517e-06	0.00495038	1.739e-06	0.0078969	5.69734e-07	0.0025872	5.88843e-07	0.00243139	1.93406e-07	0.00079859
7840	26	4.42443e-07	0.00162635	1.48735e-07	0.000546729	2.92885e-06	0.0134016	9.54333e-07	0.00436678	1.98383e-06	0.0083734	6.47441e-07	0.00273274	3.22556e-06	0.0152345	1.05036e-06	0.00496092	1.73715e-06	0.00791428	5.69129e-07	0.00259289	5.87348e-07	0.00243727	1.92915e-07	0.000800523
7850	26	4.43348e-07	0.00163079	1.49039e-07	0.000548218	2.91911e-06	0.0134309	9.51159e-07	0.0043763	1.9931e-06	0.00839331	6.5047e-07	0.00273924	3.22962e-06	0.0152668	1.05169e-06	0.00497143	1.7343e-06	0.00793164	5.68195e-07	0.00259858	5.83843e-07	0.00244312	1.91763e-07	0.000802444
7860	26	4.4414e-07	0.00163522	1.49306e-07	0.00054971	2.91321e-06	0.01346	9.49236e-07	0.0043858	1.99405e-06	0.00841323	6.50779e-07	0.00274574	3.23006e-06	0.0152991	1.05183e-06	0.00498195	1.73368e-06	0.00794898	5.67991e-07	0.00260426	5.76206e-07	0.00244892	1.89255e-07	0.000804347
7870	26	4.43022e-07	0.00163966	1.4893e-07	0.0005512	2.90869e-06	0.0134891	9.47766e-07	0.00439529	1.98508e-06	0.00843313	6.47852e-07	0.00275224	3.22577e-06	0.0153314	1.05043e-06	0.00499246	1.7344e-06	0.00796632	5.68227e-07	0.00260994	5.67214e-07	0.00245465	1.86302e-07	0.00080623
7880	26	4.35416e-07	0.00164405	1.46373e-07	0.000552679	2.89432e-06	0.0135182	9.43083e-07	0.00440475	1.97287e-06	0.00845293	6.43866e-07	0.0027587	3.22123e-06	0.0153636	1.04895e-06	0.00500296	1.73124e-06	0.00798365	5.67192e-07	0.00261562	5.69155e-07	0.00246033	1.86939e-07	0.000808095
7890	26	4.31412e-07	0.00164838	1.45027e-07	0.000554132	2.88682e-06	0.0135471	9.4064e-07	0.00441416	1.97317e-06	0.00847266	6.43964e-07	0.00276514	3.21395e-06	0.0153957	1.04658e-06	0.00501343	1.72759e-06	0.00800093	5.65996e-07	0.00262128	5.7168e-07	0.00246604	1.87768e-07	0.000809971
7900	26	4.25513e-07	0.00165266	1.43044e-07	0.000555571	2.87864e-06	0.0135759	9.37973e-07	0.00442355	1.97103e-06	0.00849237	6.43264e-07	0.00277157	3.2039e-06	0.0154278	1.04331e-06	0.00502388	1.7227e-06	0.00801818	5.64393e-07	0.00262693	5.70521e-07	0.00247173	1.87388e-07	0.000811842
7910	26	4.16e-07	0.00165686	1.39846e-07	0.000556985	2.86893e-06	0.0136046	9.34808e-07	0.00443292	1.96391e-06	0.00851205	6.40943e-07	0.00277799	3.1889e-06	0.0154598	1.03843e-06	0.00503429	1.71554e-06	0.00803537	5.62048e-07	0.00263256	5.62591e-07	0.0024774	1.84783e-07	0.000813703
7920	26	4.12462e-07	0.00166102	1.38657e-07	0.000558382	2.86184e-06	0.0136333	9.325e-07	0.00444225	1.9582e-06	0.00853166	6.39079e-07	0.00278439	3.18078e-06	0.0154917	1.03578e-06	0.00504466	1.70748e-06	0.00805249	5.59406e-07	0.00263817	5.57377e-07	0.00248301	1.83071e-07	0.000815544
7930	26	4.1002e-07	0.00166513	1.37836e-07	0.000559763	2.85628e-06	0.0136619	9.30689e-07	0.00445157	1.95191e-06	0.00855121	6.37026e-07	0.00279077	3.17558e-06	0.0155234	1.03409e-06	0.00505501	1.70165e-06	0.00806954	5.57498e-07	0.00264376	5.51177e-07	0.00248855	1.81034e-07	0.000817364
7940	26	4.01274e-07	0.00166919	1.34896e-07	0.00056113	2.8507e-06	0.0136904	9.2887e-07	0.00446087	1.94196e-06	0.00857069	6.33779e-07	0.00279713	3.16746e-06	0.0155552	1.03144e-06	0.00506534	1.7031e-06	0.00808657	5.57973e-07	0.00264934	5.38216e-07	0.00249401	1.76777e-07	0.000819158
7950	26	4.0077e-07	0.0016732	1.34726e-07	0.000562478	2.85061e-06	0.0137189	9.28842e-07	0.00447016	1.94438e-06	0.00859013	6.34566e-07	0.00280348	3.15958e-06	0.0155868	1.02888e-06	0.00507564	1.69395e-06	0.00810353	5.54976e-07	0.00265489	5.29678e-07	0.00249933	1.73973e-07	0.000820907
7960	26	3.98309e-07	0.00167719	1.33899e-07	0.000563819	2.8482e-06	0.0137474	9.28054e-07	0.00447944	1.9428e-06	0.00860956	6.34051e-07	0.00280982	3.15569e-06	0.0156184	1.02761e-06	0.00508592	1.68466e-06	0.00812042	5.5193e-07	0.00266043	5.30375e-07	0.00250465	1.74202e-07	0.000822654
7970	26	3.93443e-07	0.00168116	1.32263e-07	0.000565153	2.84323e-06	0.0137759	9.26435e-07	0.00448872	1.93663e-06	0.00862897	6.32039e-07	0.00281615	3.15547e-06	0.0156499	1.02754e-06	0.0050962	1.67599e-06	0.00813724	5.49091e-07	0.00266594	5.39278e-07	0.00250998	1.77126e-07	0.000824404
7980	26	3.96364e-07	0.00168512	1.33245e-07	0.000566485	2.82796e-06	0.0138042	9.21461e-07	0.00449794	1.92875e-06	0.00864827	6.29467e-07	0.00282245	3.15021e-06	0.0156814	1.02583e-06	0.00510646	1.67386e-06	0.00815399	5.48392e-07	0.00267143	5.36026e-07	0.00251534	1.76058e-07	0.000826165
7990	26	3.98218e-07	0.00168909	1.33868e-07	0.000567817	2.81807e-06	0.0138325	9.18236e-07	0.00450715	1.92369e-06	0.00866755	6.27817e-07	0.00282874	3.14257e-06	0.0157129	1.02334e-06	0.00511671	1.67301e-06	0.00817073	5.48113e-07	0.00267691	5.31539e-07	0.00252068	1.74584e-07	0.000827919
8000	26	3.95582e-07	0.00169305	1.32982e-07	0.00056915	2.82374e-06	0.0138607	9.20086e-07	0.00451635	1.92592e-06	0.0086868	6.28542e-07	0.00283503	3.13035e-06	0.0157443	1.01936e-06	0.00512692	1.67373e-06	0.00818746	5.4835e-07	0.00268239	5.26998e-07	0.00252597	1.73093e-07	0.000829657
8010	26	3.91695e-07	0.00169699	1.31676e-07	0.000570474	2.82693e-06	0.0138889	9.21126e-07	0.00452555	1.92966e-06	0.00870608	6.29764e-07	0.00284132	3.11952e-06	0.0157755	1.01583e-06	0.0051371	1.67069e-06	0.00820418	5.47353e-07	0.00268787	5.22422e-07	0.00253123	1.7159e-07	0.000831382
8020	26	3.86998e-07	0.00170089	1.30096e-07	0.000571786	2.82472e-06	0.0139172	9.20404e-07	0.00453476	1.93471e-06	0.00872539	6.31414e-07	0.00284762	3.11177e-06	0.0158067	1.01331e-06	0.00514725	1.66467e-06	0.00822087	5.45382e-07	0.00269334	5.17174e-07	0.00253643	1.69866e-07	0.000833091
8030	26	3.84706e-07	0.00170475	1.29326e-07	0.000573082	2.80812e-06	0.0139453	9.14995e-07	0.00454393	1.94071e-06	0.00874478	6.33371e-07	0.00285395	3.11494e-06	0.0158378	1.01434e-06	0.00515739	1.66985e-06	0.00823754	5.47079e-07	0.0026988	5.06371e-07	0.00254154	1.66318e-07	0.00083477
8040	26	3.8933e-07	0.00170862	1.3088e-07	0.000574386	2.79059e-06	0.0139733	9.09284e-07	0.00455305	1.94428e-06	0.0087642	6.34535e-07	0.00286029	3.12214e-06	0.015869	1.01669e-06	0.00516755	1.68046e-06	0.0082543	5.50554e-07	0.00270429	5.02711e-07	0.00254659	1.65116e-07	0.000836428
8050	26	3.82154e-07	0.00171248	1.28468e-07	0.000575681	2.78551e-06	0.0140012	9.07627e-07	0.00456214	1.94727e-06	0.00878366	6.35511e-07	0.00286664	3.13239e-06	0.0159003	1.02002e-06	0.00517773	1.68251e-06	0.00827111	5.51225e-07	0.0027098	5.0194e-07	0.00255161	1.64863e-07	0.000838078
8060	26	3.7443e-07	0.00171626	1.25871e-07	0.000576953	2.78689e-06	0.0140291	9.08079e-07	0.00457121	1.94374e-06	0.0088031	6.34359e-07	0.00287298	3.14408e-06	0.0159317	1.02383e-06	0.00518795	1.6851e-06	0.00828796	5.52077e-07	0.00271532	4.98792e-07	0.00255661	1.63828e-07	0.000839719
8070	26	3.74847e-07	0.00172001	1.26012e-07	0.000578213	2.78618e-06	0.0140569	9.07848e-07	0.00458029	1.93841e-06	0.00882253	6.32618e-07	0.00287932	3.15179e-06	0.0159631	1.02634e-06	0.00519819	1.69122e-06	0.00830482	5.5408e-07	0.00272084	4.95028e-07	0.00256159	1.62592e-07	0.000841355
8080	26	3.75689e-07	0.00172376	1.26295e-07	0.000579474	2.78646e-06	0.0140848	9.07936e-07	0.00458937	1.94713e-06	0.00884197	6.35467e-07	0.00288567	3.14206e-06	0.0159946	1.02317e-06	0.00520844	1.68556e-06	0.0083217	5.52225e-07	0.00272637	4.97997e-07	0.00256656	1.63567e-07	0.000842987
8090	26	3.78151e-07	0.00172754	1.27122e-07	0.000580743	2.78491e-06	0.0141126	9.07431e-07	0.00459845	1.94628e-06	0.00886141	6.35189e-07	0.00289201	3.13117e-06	0.016026	1.01962e-06	0.00521865	1.67603e-06	0.0083385	5.49105e-07	0.00273187	4.9778e-07	0.00257153	1.63496e-07	0.000844619
8100	26	3.8168e-07	0.00173133	1.28309e-07	0.000582017	2.7816e-06	0.0141405	9.06354e-07	0.00460752	1.93689e-06	0.00888085	6.32125e-07	0.00289836	3.11939e-06	0.0160572	1.01579e-06	0.00522884	1.66336e-06	0.00835523	5.44952e-07	0.00273735	4.94584e-07	0.0025765	1.62446e-07	0.000846252
8110	26	3.72406e-07	0.00173509	1.25191e-07	0.000583282	2.77186e-06	0.0141682	9.0318e-07	0.00461656	1.91981e-06	0.00890012	6.2655e-07	0.00290464	3.11243e-06	0.0160884	1.01352e-06	0.00523898	1.65837e-06	0.00837183	5.43318e-07	0.00274279	4.83608e-07	0.00258138	1.58841e-07	0.000847855
8120	26	3.69375e-07	0.0017388	1.24172e-07	0.000584528	2.7669e-06	0.0141959	9.01564e-07	0.00462559	1.91612e-06	0.0089193	6.25344e-07	0.0029109	3.10996e-06	0.0161195	1.01272e-06	0.00524911	1.65982e-06	0.00838843	5.43792e-07	0.00274823	4.86079e-07	0.00258624	1.59653e-07	0.000849451
8130	26	3.64106e-07	0.00174246	1.22401e-07	0.000585759	2.76392e-06	0.0142236	9.00592e-07	0.0046346	1.91518e-06	0.00893846	6.25039e-07	0.00291716	3.1075e-06	0.0161506	1.01192e-06	0.00525924	1.66181e-06	0.00840503	5.44447e-07	0.00275367	4.91192e-07	0.00259112	1.61332e-07	0.000851055
8140	26	3.56007e-07	0.00174606	1.19678e-07	0.000586971	2.76266e-06	0.0142512	9.00183e-07	0.0046436	1.9152e-06	0.00895761	6.25045e-07	0.00292341	3.10241e-06	0.0161816	1.01026e-06	0.00526935	1.66136e-06	0.00842165	5.44297e-07	0.00275912	4.93262e-07	0.00259604	1.62012e-07	0.000852671
8150	26	3.54694e-07	0.00174962	1.19237e-07	0.000588166	2.76431e-06	0.0142789	9.00719e-07	0.00465261	1.92138e-06	0.00897679	6.2706e-07	0.00292967	3.09237e-06	0.0162126	1.00699e-06	0.00527943	1.65638e-06	0.00843823	5.42665e-07	0.00276455	4.87177e-07	0.00260095	1.60013e-07	0.000854283
8160	26	3.57416e-07	0.00175319	1.20152e-07	0.000589366	2.76529e-06	0.0143065	9.0104e-07	0.00466162	1.92754e-06	0.00899604	6.29071e-07	0.00293595	3.0875e-06	0.0162435	1.0054e-06	0.00528949	1.65538e-06	0.0084548	5.42339e-07	0.00276998	4.857e-07	0.00260581	1.59528e-07	0.00085588
8170	26	3.5846e-07	0.00175676	1.20503e-07	0.000590566	2.76523e-06	0.0143342	9.01019e-07	0.00467063	1.93281e-06	0.00901535	6.30791e-07	0.00294225	3.08461e-06	0.0162744	1.00447e-06	0.00529954	1.65635e-06	0.00847135	5.42655e-07	0.0027754	4.93664e-07	0.00261073	1.62144e-07	0.000857496
8180	26	3.40688e-07	0.00176024	1.14529e-07	0.000591738	2.76624e-06	0.0143618	9.0135e-07	0.00467964	1.93731e-06	0.00903469	6.3226e-07	0.00294856	3.07477e-06	0.0163052	1.00126e-06	0.00530957	1.65378e-06	0.0084879	5.41814e-07	0.00278082	5.01472e-07	0.00261569	1.64709e-07	0.000859124
8190	26	3.25794e-07	0.00176357	1.09522e-07	0.000592858	2.7707e-06	0.0143895	9.02801e-07	0.00468866	1.93699e-06	0.00905406	6.32156e-07	0.00295489	3.07326e-06	0.0163359	1.00077e-06	0.00531958	1.6573e-06	0.00850446	5.42969e-07	0.00278625	4.98022e-07	0.00262069	1.63575e-07	0.000860766
8200	26	3.30303e-07	0.00176688	1.11037e-07	0.000593968	2.76983e-06	0.0144172	9.02517e-07	0.00469768	1.92073e-06	0.00907335	6.26849e-07	0.00296118	3.06781e-06	0.0163666	9.98993e-07	0.00532958	1.65834e-06	0.00852104	5.43309e-07	0.00279168	4.97864e-07	0.00262567	1.63524e-07	0.000862401
8210	26	3.37962e-07	0.00177019	1.13612e-07	0.000595083	2.76084e-06	0.0144448	8.99589e-07	0.00470669	1.91581e-06	0.00909253	6.25245e-07	0.00296744	3.06049e-06	0.0163973	9.9661e-07	0.00533956	1.65713e-06	0.00853761	5.42911e-07	0.00279711	4.96755e-07	0.00263064	1.63159e-07	0.000864034
8220	26	3.30299e-07	0.00177354	1.11036e-07	0.000596208	2.74813e-06	0.0144724	8.95449e-07	0.00471567	1.91132e-06	0.00911167	6.23778e-07	0.00297369	3.05594e-06	0.0164278	9.95129e-07	0.00534952	1.65505e-06	0.00855418	5.4223e-07	0.00280253	4.93959e-07	0.00263559	1.62241e-07	0.000865661
8230	26	3.25421e-07	0.00177681	1.09396e-07	0.000597307	2.7385e-06	0.0144998	8.92309e-07	0.00472461	1.91252e-06	0.00913079	6.24169e-07	0.00297993	3.04605e-06	0.0164583	9.91909e-07	0.00535945	1.66011e-06	0.00857077	5.43887e-07	0.00280797	4.98518e-07	0.00264056	1.63739e-07	0.000867293
8240	26	3.26826e-07	0.00178009	1.09869e-07	0.00059841	2.73414e-06	0.0145272	8.90889e-07	0.00473352	1.9229e-06	0.00914999	6.27557e-07	0.00298619	3.03652e-06	0.0164887	9.88803e-07	0.00536935	1.66466e-06	0.00858738	5.45379e-07	0.00281341	5.13296e-07	0.00264563	1.68592e-07	0.000868959
8250	26	3.38606e-07	0.00178341	1.13829e-07	0.000599525	2.73084e-06	0.0145545	8.89814e-07	0.00474243	1.93975e-06	0.00916928	6.33057e-07	0.00299249	3.02845e-06	0.0165191	9.86176e-07	0.00537923	1.6672e-06	0.00860404	5.46212e-07	0.00281887	5.31917e-07	0.00265084	1.74708e-07	0.00087067
8260	26	3.41249e-07	0.0017868	1.14717e-07	0.000600666	2.72937e-06	0.0145818	8.89335e-07	0.00475132	1.94208e-06	0.00918868	6.33817e-07	0.00299882	3.02619e-06	0.0165494	9.85442e-07	0.00538909	1.65949e-06	0.00862066	5.43684e-07	0.00282431	5.38288e-07	0.00265619	1.76801e-07	0.000872427
8270	26	3.40022e-07	0.0017902	1.14305e-07	0.000601809	2.72697e-06	0.0146091	8.88553e-07	0.00476021	1.94217e-06	0.00920811	6.33847e-07	0.00300516	3.02547e-06	0.0165796	9.85208e-07	0.00539894	1.65247e-06	0.00863723	5.41384e-07	0.00282974	5.43605e-07	0.0026616	1.78547e-07	0.000874205
8280	26	3.35873e-07	0.00179358	1.1291e-07	0.000602946	2.72242e-06	0.0146363	8.87069e-07	0.00476909	1.94389e-06	0.00922754	6.3441e-07	0.0030115	3.02513e-06	0.0166099	9.85096e-07	0.00540879	1.65025e-06	0.00865374	5.40658e-07	0.00283515	5.51634e-07	0.00266707	1.81185e-07	0.000876002
8290	26	3.38392e-07	0.00179697	1.13757e-07	0.000604085	2.72136e-06	0.0146636	8.86726e-07	0.00477796	1.94846e-06	0.00924701	6.359e-07	0.00301786	3.02185e-06	0.0166401	9.84027e-07	0.00541864	1.64575e-06	0.00867021	5.39182e-07	0.00284055	5.61029e-07	0.00267266	1.8427e-07	0.000877835
8300	26	3.42178e-07	0.00180036	1.15029e-07	0.000605224	2.72225e-06	0.0146908	8.87017e-07	0.00478683	1.95412e-06	0.00926651	6.37748e-07	0.00302422	3.01853e-06	0.0166703	9.82947e-07	0.00542848	1.64211e-06	0.00868667	5.3799e-07	0.00284594	5.70352e-07	0.00267829	1.87332e-07	0.000879684
8310	26	3.3954e-07	0.00180377	1.14142e-07	0.00060637	2.73132e-06	0.0147181	8.89972e-07	0.00479572	1.96204e-06	0.00928609	6.40332e-07	0.00303061	3.02273e-06	0.0167005	9.84315e-07	0.00543831	1.65239e-06	0.00870314	5.4136e-07	0.00285134	5.75376e-07	0.00268402	1.88982e-07	0.000881566
8320	26	3.33959e-07	0.00180712	1.12266e-07	0.000607496	2.72936e-06	0.0147453	8.89331e-07	0.00480461	1.958e-06	0.00930567	6.39012e-07	0.003037	3.02171e-06	0.0167307	9.83981e-07	0.00544815	1.6575e-06	0.0087197	5.43033e-07	0.00285676	5.71623e-07	0.00268974	1.8775e-07	0.000883445
8330	26	3.29377e-07	0.00181045	1.10726e-07	0.000608616	2.72568e-06	0.0147726	8.88131e-07	0.0048135	1.95401e-06	0.00932525	6.3771e-07	0.00304339	3.02188e-06	0.016761	9.84036e-07	0.005458	1.66222e-06	0.00873629	5.4458e-07	0.0028622	5.6649e-07	0.00269544	1.86064e-07	0.000885317
8340	26	3.30082e-07	0.00181375	1.10963e-07	0.000609725	2.72298e-06	0.0147999	8.87253e-07	0.00482237	1.9577e-06	0.00934481	6.38914e-07	0.00304977	3.02944e-06	0.0167912	9.865e-07	0.00546785	1.66886e-06	0.00875296	5.46755e-07	0.00286766	5.62089e-07	0.00270107	1.84618e-07	0.000887168
8350	26	3.26858e-07	0.00181703	1.09879e-07	0.000610827	2.72529e-06	0.0148271	8.88005e-07	0.00483125	1.96223e-06	0.00936441	6.40392e-07	0.00305617	3.03644e-06	0.0168215	9.88777e-07	0.00547773	1.67324e-06	0.00876966	5.4819e-07	0.00287313	5.53548e-07	0.00270665	1.81813e-07	0.000888999
8360	26	3.21662e-07	0.00182027	1.08133e-07	0.000611918	2.72876e-06	0.0148544	8.89137e-07	0.00484014	1.96822e-06	0.00938406	6.42349e-07	0.00306258	3.04467e-06	0.016852	9.91459e-07	0.00548763	1.67716e-06	0.00878641	5.49475e-07	0.00287862	5.45618e-07	0.00271215	1.79209e-07	0.000890807
8370	26	3.20523e-07	0.00182349	1.0775e-07	0.000612998	2.72568e-06	0.0148817	8.88132e-07	0.00484903	1.97435e-06	0.00940377	6.4435e-07	0.00306902	3.05474e-06	0.0168824	9.94738e-07	0.00549756	1.68457e-06	0.00880322	5.51901e-07	0.00288413	5.45653e-07	0.0027176	1.7922e-07	0.000892598
8380	26	3.1946e-07	0.00182669	1.07392e-07	0.000614074	2.72994e-06	0.0149089	8.8952e-07	0.00485791	1.9745e-06	0.00942352	6.44397e-07	0.00307546	3.05516e-06	0.016913	9.94874e-07	0.0055075	1.69001e-06	0.00882009	5.53684e-07	0.00288965	5.34443e-07	0.00272301	1.75538e-07	0.000894372
8390	26	3.28112e-07	0.00182994	1.10301e-07	0.000615168	2.72767e-06	0.0149362	8.8878e-07	0.0048668	1.97811e-06	0.00944329	6.45576e-07	0.00308191	3.04916e-06	0.0169435	9.92921e-07	0.00551744	1.68265e-06	0.00883693	5.51273e-07	0.00289517	5.33164e-07	0.00272835	1.75118e-07	0.000896128
8400	26	3.3747e-07	0.00183326	1.13447e-07	0.000616284	2.72257e-06	0.0149635	8.87119e-07	0.00487568	1.97979e-06	0.00946307	6.46123e-07	0.00308837	3.04319e-06	0.016974	9.90975e-07	0.00552736	1.67617e-06	0.00885374	5.49148e-07	0.00290068	5.36887e-07	0.00273371	1.76341e-07	0.000897887
8410	26	3.43253e-07	0.00183666	1.15391e-07	0.000617427	2.71675e-06	0.0149907	8.85222e-07	0.00488455	1.97715e-06	0.00948285	6.45264e-07	0.00309483	3.03903e-06	0.0170044	9.8962e-07	0.00553726	1.67717e-06	0.00887051	5.49477e-07	0.00290617	5.42811e-07	0.0027391	1.78286e-07	0.000899658
8420	26	3.44552e-07	0.0018401	1.15827e-07	0.000618583	2.71495e-06	0.0150178	8.84637e-07	0.00489339	1.97616e-06	0.00950262	6.44939e-07	0.00310128	3.02972e-06	0.0170347	9.86591e-07	0.00554714	1.68558e-06	0.00888734	5.52232e-07	0.00291169	5.43021e-07	0.00274453	1.78355e-07	0.00090144
8430	26	3.46456e-07	0.00184355	1.16468e-07	0.000619745	2.7155e-06	0.015045	8.84817e-07	0.00490224	1.97756e-06	0.00952239	6.45397e-07	0.00310773	3.0212e-06	0.017065	9.83815e-07	0.005557	1.69328e-06	0.00890422	5.54756e-07	0.00291722	5.44717e-07	0.00274997	1.78913e-07	0.000903228
8440	26	3.50344e-07	0.00184704	1.17775e-07	0.000620915	2.71859e-06	0.0150722	8.85822e-07	0.00491109	1.9819e-06	0.00954218	6.46812e-07	0.00311419	3.01294e-06	0.0170952	9.81125e-07	0.00556682	1.69467e-06	0.00892115	5.5521e-07	0.00292276	5.50073e-07	0.00275544	1.80672e-07	0.000905024
8450	26	3.54552e-07	0.00185056	1.19189e-07	0.0006221	2.72055e-06	0.0150993	8.86462e-07	0.00491996	1.98748e-06	0.00956204	6.48635e-07	0.00312067	2.99839e-06	0.0171252	9.76388e-07	0.00557661	1.68139e-06	0.00893803	5.50861e-07	0.00292829	5.54669e-07	0.00276096	1.82181e-07	0.000906838
8460	26	3.49188e-07	0.00185406	1.17386e-07	0.000623277	2.71721e-06	0.0151265	8.85373e-07	0.00492881	1.99847e-06	0.00958198	6.5222e-07	0.00312717	2.99456e-06	0.0171552	9.75142e-07	0.00558637	1.68161e-06	0.00895485	5.50932e-07	0.0029338	5.50611e-07	0.00276648	1.80849e-07	0.000908652
8470	26	3.4118e-07	0.00185753	1.14694e-07	0.000624444	2.7164e-06	0.0151537	8.85109e-07	0.00493767	2.0045e-06	0.00960199	6.54188e-07	0.00313371	2.98754e-06	0.0171851	9.72856e-07	0.0055961	1.68205e-06	0.00897166	5.51076e-07	0.00293931	5.50437e-07	0.00277199	1.80791e-07	0.000910462
8480	26	3.33815e-07	0.00186091	1.12218e-07	0.000625578	2.71574e-06	0.0151809	8.84893e-07	0.00494652	1.99879e-06	0.00962199	6.52325e-07	0.00314023	2.98185e-06	0.0172149	9.71003e-07	0.00560583	1.68332e-06	0.00898849	5.51492e-07	0.00294483	5.49635e-07	0.00277749	1.80528e-07	0.000912267
8490	26	3.3459e-07	0.00186425	1.12478e-07	0.000626703	2.71304e-06	0.015208	8.84016e-07	0.00495536	1.98432e-06	0.00964191	6.47604e-07	0.00314674	2.97913e-06	0.0172447	9.70118e-07	0.00561553	1.68507e-06	0.00900533	5.52067e-07	0.00295034	5.47689e-07	0.00278298	1.79889e-07	0.000914071
8500	26	3.44769e-07	0.00186767	1.159e-07	0.00062785	2.70686e-06	0.0152351	8.82e-07	0.00496419	1.97843e-06	0.00966172	6.45679e-07	0.0031532	2.9762e-06	0.0172745	9.69162e-07	0.00562523	1.68554e-06	0.00902219	5.52221e-07	0.00295587	5.50644e-07	0.00278848	1.80859e-07	0.000915876
8510	26	3.55582e-07	0.00187114	1.19535e-07	0.00062902	2.70024e-06	0.0152621	8.79842e-07	0.004973	1.97457e-06	0.00968149	6.44422e-07	0.00315965	2.97483e-06	0.0173043	9.68717e-07	0.00563492	1.6792e-06	0.00903899	5.50143e-07	0.00296137	5.45878e-07	0.00279393	1.79294e-07	0.000917669
8520	26	3.55523e-07	0.0018747	1.19516e-07	0.000630215	2.69325e-06	0.0152891	8.77566e-07	0.00498179	1.97296e-06	0.00970123	6.43896e-07	0.0031661	2.97566e-06	0.017334	9.68986e-07	0.00564461	1.66351e-06	0.00905573	5.45001e-07	0.00296685	5.30071e-07	0.00279934	1.74102e-07	0.000919443
8530	26	3.57342e-07	0.00187827	1.20127e-07	0.000631415	2.69648e-06	0.0153161	8.78618e-07	0.00499057	1.9713e-06	0.00972095	6.43354e-07	0.00317253	2.97775e-06	0.0173638	9.69667e-07	0.0056543	1.65462e-06	0.00907232	5.42089e-07	0.00297229	5.33283e-07	0.00280467	1.75157e-07	0.000921193
8540	26	3.6095e-07	0.00188185	1.2134e-07	0.00063262	2.69638e-06	0.015343	8.78587e-07	0.00499936	1.97393e-06	0.00974068	6.44212e-07	0.00317897	2.98767e-06	0.0173936	9.72897e-07	0.00566402	1.65564e-06	0.00908888	5.42425e-07	0.00297771	5.42578e-07	0.00281005	1.7821e-07	0.000922963
8550	26	3.64e-07	0.00188548	1.22365e-07	0.000633839	2.69264e-06	0.01537	8.77367e-07	0.00500814	1.97835e-06	0.00976044	6.45655e-07	0.00318542	2.99541e-06	0.0174235	9.75418e-07	0.00567375	1.66121e-06	0.00910546	5.44249e-07	0.00298315	5.50015e-07	0.0028155	1.80653e-07	0.000924753
8560	26	3.65846e-07	0.00188913	1.22986e-07	0.000635066	2.68765e-06	0.0153969	8.75741e-07	0.0050169	1.98105e-06	0.00978024	6.46535e-07	0.00319188	2.9891e-06	0.0174535	9.73363e-07	0.0056835	1.66508e-06	0.00912209	5.45516e-07	0.00298859	5.49867e-07	0.002821	1.80604e-07	0.00092656
8570	26	3.69517e-07	0.00189281	1.2422e-07	0.000636303	2.68979e-06	0.0154238	8.76439e-07	0.00502567	1.99247e-06	0.00980014	6.50263e-07	0.00319837	2.9853e-06	0.0174833	9.72127e-07	0.00569322	1.6636e-06	0.00913872	5.45033e-07	0.00299404	5.51492e-07	0.00282652	1.81138e-07	0.00092837
8580	26	3.73517e-07	0.00189652	1.25565e-07	0.000637549	2.69086e-06	0.0154507	8.76786e-07	0.00503443	2.00418e-06	0.0098201	6.54085e-07	0.00320489	2.98296e-06	0.0175132	9.71365e-07	0.00570294	1.66275e-06	0.00915536	5.44752e-07	0.0029995	5.51394e-07	0.00283202	1.81106e-07	0.000930179
8590	26	3.69478e-07	0.00190023	1.24207e-07	0.000638797	2.68454e-06	0.0154775	8.74728e-07	0.00504319	2.01102e-06	0.00984018	6.56318e-07	0.00321144	2.98369e-06	0.017543	9.71602e-07	0.00571266	1.66733e-06	0.00917202	5.46255e-07	0.00300495	5.45205e-07	0.0028375	1.79073e-07	0.000931978
8600	26	3.76481e-07	0.00190397	1.26561e-07	0.000640055	2.67994e-06	0.0155044	8.7323e-07	0.00505193	2.01119e-06	0.00986028	6.56374e-07	0.003218	2.98208e-06	0.0175728	9.71078e-07	0.00572237	1.67467e-06	0.00918873	5.48658e-07	0.00301043	5.43738e-07	0.00284295	1.78591e-07	0.000933768
8610	26	3.87966e-07	0.00190778	1.30422e-07	0.000641335	2.67762e-06	0.0155312	8.72474e-07	0.00506066	2.00786e-06	0.00988038	6.55287e-07	0.00322456	2.97873e-06	0.0176026	9.69985e-07	0.00573208	1.68095e-06	0.0092055	5.50715e-07	0.00301592	5.49381e-07	0.00284842	1.80444e-07	0.000935564
8620	26	3.94234e-07	0.00191169	1.32529e-07	0.000642649	2.67812e-06	0.0155579	8.72637e-07	0.00506938	2.00361e-06	0.00990043	6.53897e-07	0.00323111	2.97616e-06	0.0176324	9.69149e-07	0.00574177	1.68282e-06	0.00922232	5.5133e-07	0.00302143	5.60828e-07	0.00285397	1.84204e-07	0.000937388
8630	26	3.91088e-07	0.00191561	1.31471e-07	0.000643967	2.6789e-06	0.0155847	8.72892e-07	0.00507811	1.99858e-06	0.00992044	6.52258e-07	0.00323764	2.97886e-06	0.0176622	9.70027e-07	0.00575147	1.68456e-06	0.00923915	5.51898e-07	0.00302695	5.62217e-07	0.00285959	1.8466e-07	0.000939232
8640	26	3.89249e-07	0.00191952	1.30853e-07	0.000645281	2.67663e-06	0.0156115	8.7215e-07	0.00508683	1.99687e-06	0.00994043	6.51698e-07	0.00324416	2.97819e-06	0.017692	9.69812e-07	0.00576117	1.67896e-06	0.00925597	5.50064e-07	0.00303246	5.62116e-07	0.00286521	1.84627e-07	0.000941078
8650	26	3.86439e-07	0.00192339	1.29909e-07	0.000646584	2.66972e-06	0.0156382	8.69899e-07	0.00509554	1.99919e-06	0.00996041	6.52456e-07	0.00325068	2.97102e-06	0.0177217	9.67474e-07	0.00577085	1.67028e-06	0.00927272	5.4722e-07	0.00303794	5.61562e-07	0.00287082	1.84445e-07	0.000942923
8660	26	3.78015e-07	0.00192723	1.27077e-07	0.000647874	2.66094e-06	0.0156649	8.67039e-07	0.00510423	2.00214e-06	0.00998041	6.5342e-07	0.00325721	2.96015e-06	0.0177514	9.63935e-07	0.00578052	1.6703e-06	0.00928942	5.47228e-07	0.00304342	5.60868e-07	0.00287644	1.84217e-07	0.000944767
8670	26	3.88473e-07	0.00193107	1.30592e-07	0.000649165	2.66171e-06	0.0156915	8.67289e-07	0.00511291	2.00383e-06	0.0100004	6.53971e-07	0.00326374	2.95739e-06	0.017781	9.63038e-07	0.00579015	1.66489e-06	0.00930609	5.45454e-07	0.00304888	5.62188e-07	0.00288205	1.84651e-07	0.000946612
8680	26	3.95814e-07	0.00193499	1.3306e-07	0.000650482	2.66302e-06	0.0157181	8.67716e-07	0.00512158	1.99905e-06	0.0100204	6.52409e-07	0.00327027	2.9574e-06	0.0178105	9.6304e-07	0.00579978	1.66197e-06	0.00932273	5.44497e-07	0.00305433	5.56301e-07	0.00288765	1.82717e-07	0.000948449
8690	26	3.96694e-07	0.00193895	1.33356e-07	0.000651814	2.66274e-06	0.0157448	8.67624e-07	0.00513026	1.99636e-06	0.0100404	6.51533e-07	0.0032768	2.95151e-06	0.0178401	9.61121e-07	0.0058094	1.67119e-06	0.00933942	5.47518e-07	0.0030598	5.57692e-07	0.00289322	1.83174e-07	0.00095028
8700	26	3.94993e-07	0.00194291	1.32784e-07	0.000653143	2.66313e-06	0.0157714	8.67753e-07	0.00513893	1.99926e-06	0.0100604	6.52478e-07	0.00328332	2.94732e-06	0.0178696	9.59757e-07	0.005819	1.67742e-06	0.00935614	5.49558e-07	0.00306528	5.60418e-07	0.00289881	1.84069e-07	0.000952116
8710	26	3.90608e-07	0.00194684	1.3131e-07	0.000654465	2.66484e-06	0.015798	8.6831e-07	0.00514761	2.00662e-06	0.0100804	6.54881e-07	0.00328985	2.94674e-06	0.017899	9.59569e-07	0.0058286	1.67621e-06	0.00937291	5.49161e-07	0.00307077	5.62812e-07	0.00290443	1.84856e-07	0.00095396
8720	26	3.86173e-07	0.00195072	1.29819e-07	0.000655771	2.66339e-06	0.0158247	8.67836e-07	0.00515629	2.01e-06	0.0101005	6.55982e-07	0.0032964	2.93438e-06	0.0179284	9.55545e-07	0.00583817	1.67735e-06	0.00938968	5.49537e-07	0.00307626	5.5911e-07	0.00291003	1.8364e-07	0.000955801
8730	26	3.83144e-07	0.00195456	1.28801e-07	0.000657063	2.66299e-06	0.0158513	8.67705e-07	0.00516497	2.00688e-06	0.0101206	6.54965e-07	0.00330296	2.9258e-06	0.0179577	9.5275e-07	0.00584771	1.67735e-06	0.00940645	5.49535e-07	0.00308176	5.60829e-07	0.00291564	1.84204e-07	0.000957644
8740	26	3.81232e-07	0.00195839	1.28158e-07	0.000658349	2.66373e-06	0.0158779	8.67949e-07	0.00517365	2.00205e-06	0.0101406	6.53388e-07	0.0033095	2.92157e-06	0.017987	9.51373e-07	0.00585724	1.6758e-06	0.00942322	5.49029e-07	0.00308725	5.65916e-07	0.00292127	1.85875e-07	0.000959492
8750	26	3.81496e-07	0.00196221	1.28247e-07	0.000659631	2.66572e-06	0.0159046	8.68595e-07	0.00518233	1.99787e-06	0.0101606	6.52027e-07	0.00331603	2.92299e-06	0.0180162	9.51836e-07	0.00586675	1.6704e-06	0.00943994	5.4726e-07	0.00309273	5.69337e-07	0.00292695	1.86999e-07	0.000961357
8760	26	3.83861e-07	0.00196604	1.29042e-07	0.00066092	2.6609e-06	0.0159312	8.67024e-07	0.005191	1.99517e-06	0.0101806	6.51144e-07	0.00332255	2.92529e-06	0.0180455	9.52583e-07	0.00587628	1.66877e-06	0.00945665	5.46727e-07	0.0030982	5.7365e-07	0.00293267	1.88416e-07	0.000963236
8770	26	3.88206e-07	0.00196989	1.30502e-07	0.000662216	2.64866e-06	0.0159578	8.63035e-07	0.00519966	1.99731e-06	0.0102006	6.51843e-07	0.00332906	2.92783e-06	0.0180747	9.53412e-07	0.00588581	1.67164e-06	0.00947335	5.47665e-07	0.00310368	5.79118e-07	0.00293843	1.90212e-07	0.000965127
8780	26	3.92132e-07	0.0019738	1.31822e-07	0.00066353	2.64427e-06	0.0159842	8.61608e-07	0.00520828	2.00051e-06	0.0102206	6.52887e-07	0.00333558	2.92493e-06	0.018104	9.52468e-07	0.00589533	1.67121e-06	0.00949006	5.47525e-07	0.00310915	5.77738e-07	0.00294419	1.89758e-07	0.000967022
8790	26	3.95907e-07	0.00197773	1.33091e-07	0.00066485	2.64272e-06	0.0160107	8.61102e-07	0.0052169	2.00362e-06	0.0102406	6.53902e-07	0.00334212	2.92008e-06	0.0181332	9.50887e-07	0.00590485	1.6696e-06	0.00950677	5.46998e-07	0.00311462	5.73895e-07	0.00294997	1.88496e-07	0.000968917
8800	26	3.9474e-07	0.00198168	1.32699e-07	0.000666178	2.64535e-06	0.0160371	8.6196e-07	0.00522552	2.00651e-06	0.0102606	6.54846e-07	0.00334866	2.91435e-06	0.0181624	9.49021e-07	0.00591435	1.66338e-06	0.00952342	5.44958e-07	0.00312008	5.65695e-07	0.00295564	1.85803e-07	0.000970782
8810	26	3.97165e-07	0.00198565	1.33514e-07	0.000667513	2.64999e-06	0.0160636	8.6347e-07	0.00523415	2.00452e-06	0.0102807	6.54195e-07	0.0033552	2.91023e-06	0.0181915	9.4768e-07	0.00592383	1.65919e-06	0.00954003	5.43586e-07	0.00312552	5.64149e-07	0.00296131	1.85295e-07	0.000972644
8820	26	4.04089e-07	0.00198965	1.35842e-07	0.000668856	2.6566e-06	0.0160901	8.65625e-07	0.00524279	1.99681e-06	0.0103007	6.51681e-07	0.00336174	2.90812e-06	0.0182206	9.46991e-07	0.00593331	1.65767e-06	0.00955662	5.43088e-07	0.00313096	5.7066e-07	0.00296697	1.87434e-07	0.000974503
8830	26	4.07193e-07	0.00199371	1.36886e-07	0.000670221	2.65758e-06	0.0161167	8.65944e-07	0.00525144	1.99231e-06	0.0103206	6.50212e-07	0.00336824	2.90834e-06	0.0182497	9.47064e-07	0.00594278	1.65359e-06	0.00957316	5.4175e-07	0.00313638	5.72249e-07	0.00297269	1.87955e-07	0.000976381
8840	26	4.06242e-07	0.00199776	1.36566e-07	0.000671584	2.6556e-06	0.0161432	8.65298e-07	0.0052601	1.98754e-06	0.0103405	6.48655e-07	0.00337474	2.90857e-06	0.0182788	9.47139e-07	0.00595225	1.64932e-06	0.00958969	5.40352e-07	0.00314179	5.72773e-07	0.00297841	1.88128e-07	0.00097826
8850	26	3.91276e-07	0.00200173	1.31535e-07	0.000672919	2.65211e-06	0.0161698	8.64161e-07	0.00526875	1.97997e-06	0.0103604	6.46185e-07	0.00338121	2.90732e-06	0.0183078	9.46734e-07	0.00596172	1.64635e-06	0.00960617	5.39379e-07	0.00314719	5.7307e-07	0.00298414	1.88225e-07	0.000980143
8860	26	3.87731e-07	0.00200564	1.30343e-07	0.000674231	2.64622e-06	0.0161963	8.62241e-07	0.00527738	1.97491e-06	0.0103801	6.44531e-07	0.00338767	2.90565e-06	0.0183369	9.4619e-07	0.00597118	1.64698e-06	0.00962264	5.39587e-07	0.00315259	5.79326e-07	0.00298991	1.9028e-07	0.000982037
8870	26	3.85911e-07	0.00200949	1.29731e-07	0.000675529	2.63677e-06	0.0162227	8.59163e-07	0.00528598	1.97414e-06	0.0103999	6.44279e-07	0.00339411	2.90472e-06	0.018366	9.45886e-07	0.00598064	1.64812e-06	0.00963911	5.3996e-07	0.00315798	5.85344e-07	0.00299573	1.92256e-07	0.000983947
8880	26	3.80801e-07	0.00201333	1.28013e-07	0.000676818	2.6293e-06	0.016249	8.56727e-07	0.00529456	1.97783e-06	0.0104197	6.45485e-07	0.00340056	2.90497e-06	0.018395	9.45967e-07	0.0059901	1.64817e-06	0.00965559	5.39976e-07	0.00316338	5.84035e-07	0.00300156	1.91827e-07	0.000985864
8890	26	3.8335e-07	0.00201717	1.2887e-07	0.000678107	2.62851e-06	0.0162753	8.5647e-07	0.00530313	1.97736e-06	0.0104394	6.45331e-07	0.00340701	2.89949e-06	0.018424	9.44184e-07	0.00599955	1.64452e-06	0.00967205	5.3878e-07	0.00316877	5.75703e-07	0.00300736	1.8909e-07	0.00098777
8900	26	3.8788e-07	0.00202102	1.30393e-07	0.000679402	2.63057e-06	0.0163016	8.57143e-07	0.0053117	1.9747e-06	0.0104592	6.44462e-07	0.00341346	2.89053e-06	0.018453	9.41265e-07	0.00600898	1.64329e-06	0.00968849	5.38377e-07	0.00317416	5.62599e-07	0.00301304	1.84786e-07	0.000989635
8910	26	3.8871e-07	0.0020249	1.30672e-07	0.000680706	2.62596e-06	0.0163279	8.55641e-07	0.00532026	1.97127e-06	0.0104789	6.43345e-07	0.0034199	2.88062e-06	0.0184818	9.38038e-07	0.00601838	1.64814e-06	0.00970494	5.39966e-07	0.00317955	5.53968e-07	0.00301864	1.81951e-07	0.000991475
8920	26	3.80058e-07	0.00202874	1.27764e-07	0.000681998	2.6163e-06	0.0163541	8.52491e-07	0.0053288	1.96499e-06	0.0104986	6.41295e-07	0.00342633	2.87685e-06	0.0185106	9.36809e-07	0.00602775	1.6398e-06	0.00972138	5.37235e-07	0.00318494	5.5061e-07	0.00302416	1.80848e-07	0.000993288
8930	26	3.80324e-07	0.00203255	1.27853e-07	0.000683279	2.60828e-06	0.0163802	8.49878e-07	0.00533731	1.97212e-06	0.0105183	6.43622e-07	0.00343276	2.86526e-06	0.0185393	9.33035e-07	0.00603709	1.63128e-06	0.00973771	5.34444e-07	0.00319029	5.38019e-07	0.00302961	1.76712e-07	0.000995075
8940	26	3.81016e-07	0.00203635	1.28086e-07	0.000684556	2.60671e-06	0.0164063	8.49369e-07	0.00534581	1.97977e-06	0.0105381	6.46119e-07	0.0034392	2.85456e-06	0.0185679	9.2955e-07	0.00604641	1.62205e-06	0.00975399	5.31419e-07	0.00319562	5.31696e-07	0.00303495	1.74636e-07	0.000996831
8950	26	3.75496e-07	0.00204012	1.2623e-07	0.000685825	2.61249e-06	0.0164324	8.51252e-07	0.00535432	1.97812e-06	0.0105578	6.45579e-07	0.00344566	2.85468e-06	0.0185965	9.2959e-07	0.00605571	1.60916e-06	0.00977014	5.27197e-07	0.00320091	5.26622e-07	0.00304024	1.72969e-07	0.00099857
8960	26	3.72383e-07	0.00204387	1.25184e-07	0.000687084	2.61146e-06	0.0164585	8.50915e-07	0.00536282	1.97491e-06	0.0105776	6.44532e-07	0.00345211	2.84899e-06	0.018625	9.27736e-07	0.00606499	1.60321e-06	0.00978622	5.25247e-07	0.00320618	5.19607e-07	0.00304548	1.70665e-07	0.00100029
8970	26	3.71488e-07	0.00204759	1.24883e-07	0.000688335	2.60127e-06	0.0164845	8.47596e-07	0.00537131	1.97026e-06	0.0105973	6.43015e-07	0.00345855	2.8382e-06	0.0186534	9.24224e-07	0.00607426	1.60316e-06	0.00980225	5.25229e-07	0.00321143	5.06097e-07	0.00305062	1.66228e-07	0.00100198
8980	26	3.71706e-07	0.00205131	1.24956e-07	0.000689585	2.58494e-06	0.0165105	8.42275e-07	0.00537976	1.95471e-06	0.0106169	6.3794e-07	0.00346494	2.82795e-06	0.0186817	9.20885e-07	0.00608348	1.60543e-06	0.0098183	5.25972e-07	0.00321669	5.04784e-07	0.00305567	1.65797e-07	0.00100364
8990	26	3.66046e-07	0.00205499	1.23053e-07	0.000690823	2.57672e-06	0.0165363	8.39595e-07	0.00538818	1.94196e-06	0.0106364	6.33777e-07	0.0034713	2.82168e-06	0.01871	9.18845e-07	0.00609268	1.60433e-06	0.00983434	5.25615e-07	0.00322194	5.04651e-07	0.00306072	1.65753e-07	0.00100529
9000	26	3.5551e-07	0.0020586	1.19511e-07	0.000692038	2.57495e-06	0.0165621	8.39021e-07	0.00539657	1.93722e-06	0.0106558	6.32231e-07	0.00347764	2.82234e-06	0.0187382	9.19059e-07	0.00610187	1.60039e-06	0.00985037	5.24323e-07	0.00322719	5.06158e-07	0.00306578	1.66248e-07	0.00100696
9010	26	3.62598e-07	0.00206219	1.21894e-07	0.000693244	2.57392e-06	0.0165878	8.38685e-07	0.00540496	1.93981e-06	0.0106752	6.33077e-07	0.00348396	2.8228e-06	0.0187665	9.19209e-07	0.00611106	1.60581e-06	0.00986639	5.26097e-07	0.00323245	5.09348e-07	0.00307085	1.67295e-07	0.00100862
9020	26	3.68627e-07	0.00206585	1.23921e-07	0.000694474	2.55834e-06	0.0166135	8.33607e-07	0.00541332	1.94046e-06	0.0106946	6.33287e-07	0.00349029	2.81948e-06	0.0187947	9.18129e-07	0.00612025	1.60519e-06	0.00988245	5.25896e-07	0.00323771	5.13151e-07	0.00307597	1.68545e-07	0.0010103
9030	26	3.6251e-07	0.00206949	1.21864e-07	0.000695697	2.55115e-06	0.016639	8.31263e-07	0.00542164	1.93566e-06	0.010714	6.31721e-07	0.00349662	2.81618e-06	0.0188228	9.17052e-07	0.00612942	1.60367e-06	0.00989849	5.25397e-07	0.00324296	5.19255e-07	0.00308113	1.70549e-07	0.001012
9040	26	3.49595e-07	0.00207304	1.17523e-07	0.000696892	2.55017e-06	0.0166645	8.30945e-07	0.00542996	1.92819e-06	0.0107333	6.29283e-07	0.00350292	2.80789e-06	0.0188509	9.14353e-07	0.00613857	1.60123e-06	0.00991451	5.24598e-07	0.00324821	5.17471e-07	0.00308629	1.69964e-07	0.00101369
9050	26	3.33974e-07	0.00207646	1.12272e-07	0.000698042	2.55234e-06	0.01669	8.31652e-07	0.00543827	1.92024e-06	0.0107525	6.26688e-07	0.0035092	2.79151e-06	0.0188789	9.0902e-07	0.00614769	1.59739e-06	0.00993051	5.23341e-07	0.00325345	5.01358e-07	0.00309139	1.64671e-07	0.00101537
9060	26	3.23021e-07	0.00207975	1.08589e-07	0.000699145	2.54382e-06	0.0167155	8.28876e-07	0.00544656	1.91733e-06	0.0107717	6.25739e-07	0.00351546	2.78327e-06	0.0189068	9.06336e-07	0.00615677	1.59105e-06	0.00994644	5.21264e-07	0.00325867	4.93737e-07	0.00309637	1.62168e-07	0.001017
9070	26	3.14616e-07	0.00208296	1.05764e-07	0.000700226	2.53118e-06	0.0167409	8.24756e-07	0.00545484	1.91615e-06	0.0107909	6.25354e-07	0.00352172	2.77862e-06	0.0189347	9.04824e-07	0.00616583	1.58391e-06	0.00996234	5.18924e-07	0.00326388	4.89601e-07	0.0031013	1.6081e-07	0.00101862
9080	26	3.13546e-07	0.0020861	1.05404e-07	0.000701281	2.52865e-06	0.0167662	8.23931e-07	0.00546309	1.90708e-06	0.01081	6.22396e-07	0.00352796	2.77238e-06	0.0189624	9.0279e-07	0.00617487	1.58118e-06	0.00997816	5.18031e-07	0.00326906	4.78422e-07	0.00310613	1.57138e-07	0.00102021
9090	26	3.16093e-07	0.00208925	1.0626e-07	0.000702341	2.53197e-06	0.0167915	8.25014e-07	0.00547133	1.89955e-06	0.010829	6.19938e-07	0.00353417	2.76314e-06	0.0189901	8.99783e-07	0.00618388	1.57956e-06	0.00999396	5.17498e-07	0.00327424	4.73548e-07	0.00311089	1.55537e-07	0.00102177
9100	26	3.20501e-07	0.00209243	1.07742e-07	0.00070341	2.53446e-06	0.0168168	8.25826e-07	0.00547958	1.89319e-06	0.010848	6.1786e-07	0.00354036	2.75719e-06	0.0190177	8.97846e-07	0.00619287	1.57662e-06	0.0100097	5.16536e-07	0.00327941	4.79876e-07	0.00311566	1.57615e-07	0.00102334
9110	26	3.2637e-07	0.00209567	1.09715e-07	0.000704499	2.53049e-06	0.0168422	8.24531e-07	0.00548783	1.89082e-06	0.0108669	6.1709e-07	0.00354653	2.75618e-06	0.0190452	8.97517e-07	0.00620184	1.57182e-06	0.0100255	5.14963e-07	0.00328457	4.87064e-07	0.00312049	1.59976e-07	0.00102493
9120	26	3.30447e-07	0.00209895	1.11086e-07	0.000705601	2.52352e-06	0.0168674	8.22263e-07	0.00549607	1.89265e-06	0.0108858	6.17685e-07	0.00355271	2.75376e-06	0.0190728	8.96728e-07	0.00621081	1.56753e-06	0.0100412	5.13556e-07	0.00328971	4.82421e-07	0.00312534	1.58451e-07	0.00102652
9130	26	3.21946e-07	0.0021022	1.08228e-07	0.000706694	2.52087e-06	0.0168927	8.21397e-07	0.00550429	1.89435e-06	0.0109048	6.18242e-07	0.00355889	2.74424e-06	0.0191003	8.93627e-07	0.00621976	1.56545e-06	0.0100568	5.12874e-07	0.00329484	4.7587e-07	0.00313012	1.563e-07	0.00102809
9140	26	3.14369e-07	0.00210539	1.05681e-07	0.000707765	2.5112e-06	0.0169178	8.18248e-07	0.00551249	1.89435e-06	0.0109237	6.18241e-07	0.00356507	2.73146e-06	0.0191277	8.89467e-07	0.00622868	1.56421e-06	0.0100725	5.12469e-07	0.00329997	4.75488e-07	0.00313489	1.56174e-07	0.00102965
9150	26	3.0995e-07	0.00210852	1.04195e-07	0.000708818	2.4931e-06	0.0169428	8.12349e-07	0.00552064	1.8927e-06	0.0109427	6.17701e-07	0.00357125	2.72892e-06	0.019155	8.88638e-07	0.00623758	1.56406e-06	0.0100881	5.12421e-07	0.00330509	4.78225e-07	0.00313965	1.57073e-07	0.00103122
9160	26	3.13775e-07	0.00211166	1.05481e-07	0.000709872	2.47607e-06	0.0169677	8.068e-07	0.00552873	1.87849e-06	0.0109615	6.13064e-07	0.00357739	2.73508e-06	0.0191823	8.90644e-07	0.00624647	1.56176e-06	0.0101038	5.11665e-07	0.00331021	4.76968e-07	0.00314443	1.5666e-07	0.00103279
9170	26	3.15942e-07	0.00211479	1.0621e-07	0.000710925	2.46339e-06	0.0169924	8.02669e-07	0.00553678	1.86562e-06	0.0109802	6.08863e-07	0.00358351	2.73101e-06	0.0192096	8.8932e-07	0.00625537	1.55421e-06	0.0101193	5.09195e-07	0.00331532	4.74623e-07	0.00314918	1.5589e-07	0.00103435
9180	26	3.07261e-07	0.00211791	1.03291e-07	0.000711975	2.45988e-06	0.017017	8.01523e-07	0.0055448	1.86396e-06	0.0109989	6.08322e-07	0.0035896	2.72883e-06	0.0192369	8.88608e-07	0.00626426	1.54693e-06	0.0101348	5.06808e-07	0.00332039	4.60538e-07	0.00315384	1.51264e-07	0.00103588
9190	26	2.91477e-07	0.00212089	9.79853e-08	0.000712975	2.46126e-06	0.0170416	8.01976e-07	0.00555282	1.86569e-06	0.0110175	6.08886e-07	0.00359568	2.72713e-06	0.0192642	8.88057e-07	0.00627314	1.54229e-06	0.0101503	5.05289e-07	0.00332546	4.45745e-07	0.00315839	1.46405e-07	0.00103737
9200	26	2.82593e-07	0.00212375	9.49989e-08	0.000713938	2.46417e-06	0.0170662	8.02922e-07	0.00556085	1.8672e-06	0.0110362	6.09378e-07	0.00360178	2.72516e-06	0.0192915	8.87414e-07	0.00628202	1.54117e-06	0.0101657	5.04922e-07	0.00333051	4.37945e-07	0.00316281	1.43843e-07	0.00103883
9210	26	2.7841e-07	0.00212657	9.35926e-08	0.000714886	2.46264e-06	0.0170909	8.02423e-07	0.00556887	1.86748e-06	0.0110549	6.0947e-07	0.00360787	2.72491e-06	0.0193187	8.87331e-07	0.00629089	1.53436e-06	0.0101811	5.02689e-07	0.00333554	4.35734e-07	0.00316718	1.43117e-07	0.00104026
9220	26	2.80884e-07	0.00212937	9.44243e-08	0.000715826	2.45914e-06	0.0171155	8.01284e-07	0.00557689	1.8648e-06	0.0110735	6.08595e-07	0.00361396	2.72633e-06	0.019346	8.87795e-07	0.00629977	1.53155e-06	0.0101964	5.0177e-07	0.00334057	4.36258e-07	0.00317155	1.43289e-07	0.0010417
9230	26	2.71988e-07	0.00213211	9.14337e-08	0.000716748	2.4536e-06	0.01714	7.99478e-07	0.00558489	1.86509e-06	0.0110922	6.08691e-07	0.00362005	2.72789e-06	0.0193732	8.88303e-07	0.00630865	1.53272e-06	0.0102117	5.02152e-07	0.00334559	4.37717e-07	0.00317592	1.43768e-07	0.00104313
9240	26	2.60889e-07	0.00213479	8.77028e-08	0.000717648	2.44622e-06	0.0171645	7.97074e-07	0.00559288	1.8707e-06	0.0111109	6.10521e-07	0.00362615	2.72515e-06	0.0194005	8.87412e-07	0.00631753	1.52759e-06	0.010227	5.00471e-07	0.0033506	4.35553e-07	0.00318028	1.43058e-07	0.00104456
9250	26	2.56749e-07	0.00213738	8.6311e-08	0.000718519	2.43971e-06	0.017189	7.94951e-07	0.00560084	1.8852e-06	0.0111296	6.15255e-07	0.00363227	2.71016e-06	0.0194277	8.82531e-07	0.00632638	1.52597e-06	0.0102423	4.99941e-07	0.00335561	4.22099e-07	0.00318453	1.38639e-07	0.00104596
9260	26	2.55155e-07	0.00213994	8.5775e-08	0.00071938	2.43215e-06	0.0172133	7.92488e-07	0.00560877	1.88833e-06	0.0111485	6.16275e-07	0.00363843	2.71061e-06	0.0194548	8.82675e-07	0.00633521	1.52572e-06	0.0102576	4.9986e-07	0.0033606	4.04339e-07	0.00318869	1.32805e-07	0.00104733
9270	26	2.57018e-07	0.00214251	8.64013e-08	0.000720244	2.42509e-06	0.0172376	7.90188e-07	0.00561669	1.88556e-06	0.0111674	6.15372e-07	0.00364458	2.71595e-06	0.0194819	8.84416e-07	0.00634404	1.5268e-06	0.0102728	5.00213e-07	0.00336561	3.99506e-07	0.00319272	1.31218e-07	0.00104865
9280	26	2.62709e-07	0.0021451	8.83143e-08	0.000721116	2.41947e-06	0.0172618	7.88358e-07	0.00562458	1.87932e-06	0.0111862	6.13334e-07	0.00365073	2.7225e-06	0.0195091	8.86546e-07	0.0063529	1.52921e-06	0.0102881	5.01001e-07	0.00337061	4.03653e-07	0.00319674	1.3258e-07	0.00104997
9290	26	2.6333e-07	0.00214773	8.85231e-08	0.000721998	2.42759e-06	0.0172861	7.91005e-07	0.00563248	1.88896e-06	0.0112051	6.16482e-07	0.00365688	2.71639e-06	0.0195363	8.84557e-07	0.00636174	1.53077e-06	0.0103034	5.01513e-07	0.00337562	4.1158e-07	0.00320081	1.35183e-07	0.00105131
9300	26	2.6228e-07	0.00215036	8.81703e-08	0.000722882	2.43023e-06	0.0173104	7.91863e-07	0.00564039	1.89673e-06	0.011224	6.19018e-07	0.00366306	2.70683e-06	0.0195634	8.81445e-07	0.00637058	1.53482e-06	0.0103187	5.02841e-07	0.00338065	4.09133e-07	0.00320492	1.3438e-07	0.00105266
9310	26	2.60475e-07	0.00215297	8.75633e-08	0.00072376	2.42451e-06	0.0173346	7.9e-07	0.0056483	1.89947e-06	0.011243	6.19912e-07	0.00366925	2.70117e-06	0.0195905	8.79603e-07	0.00637938	1.54066e-06	0.0103341	5.04755e-07	0.00338568	4.11677e-07	0.00320902	1.35215e-07	0.001054
9320	26	2.59817e-07	0.00215557	8.73423e-08	0.000724635	2.41991e-06	0.0173589	7.88501e-07	0.0056562	1.90194e-06	0.011262	6.20716e-07	0.00367546	2.70367e-06	0.0196175	8.80417e-07	0.00638819	1.54327e-06	0.0103495	5.05607e-07	0.00339073	4.14872e-07	0.00321316	1.36265e-07	0.00105536
9330	26	2.57202e-07	0.00215815	8.64631e-08	0.000725502	2.42015e-06	0.0173831	7.88581e-07	0.00566408	1.90452e-06	0.011281	6.21559e-07	0.00368167	2.71044e-06	0.0196446	8.8262e-07	0.006397	1.54181e-06	0.010365	5.05132e-07	0.00339579	4.1626e-07	0.00321731	1.36721e-07	0.00105673
9340	26	2.43126e-07	0.00216065	8.17314e-08	0.000726342	2.42135e-06	0.0174073	7.8897e-07	0.00567197	1.90301e-06	0.0113	6.21067e-07	0.00368788	2.71611e-06	0.0196717	8.84469e-07	0.00640584	1.53634e-06	0.0103803	5.03338e-07	0.00340083	4.04194e-07	0.0032214	1.32758e-07	0.00105807
9350	26	2.45356e-07	0.00216311	8.24808e-08	0.00072717	2.42308e-06	0.0174315	7.89533e-07	0.00567986	1.89714e-06	0.011319	6.19152e-07	0.00369408	2.72135e-06	0.0196989	8.86173e-07	0.00641469	1.52641e-06	0.0103957	5.00086e-07	0.00340584	4.02786e-07	0.00322544	1.32295e-07	0.0010594
9360	26	2.47911e-07	0.00216556	8.334e-08	0.000727994	2.42232e-06	0.0174557	7.89288e-07	0.00568776	1.89571e-06	0.011338	6.18683e-07	0.00370027	2.72237e-06	0.0197261	8.86505e-07	0.00642355	1.51432e-06	0.0104109	4.96126e-07	0.00341082	4.01338e-07	0.00322946	1.3182e-07	0.00106072
9370	26	2.41432e-07	0.00216801	8.11619e-08	0.000728816	2.4211e-06	0.0174799	7.88887e-07	0.00569565	1.89201e-06	0.0113569	6.17477e-07	0.00370645	2.71581e-06	0.0197533	8.8437e-07	0.00643241	1.50474e-06	0.010426	4.92986e-07	0.00341577	4.00182e-07	0.00323347	1.3144e-07	0.00106203
9380	26	2.4334e-07	0.00217043	8.18032e-08	0.000729631	2.41995e-06	0.0175041	7.88514e-07	0.00570354	1.88377e-06	0.0113758	6.14787e-07	0.00371261	2.70838e-06	0.0197804	8.81951e-07	0.00644124	1.49989e-06	0.010441	4.91398e-07	0.0034207	4.00825e-07	0.00323747	1.31651e-07	0.00106335
9390	26	2.53787e-07	0.00217291	8.53152e-08	0.000730463	2.41613e-06	0.0175283	7.87269e-07	0.00571142	1.87545e-06	0.0113946	6.12073e-07	0.00371875	2.69311e-06	0.0198074	8.76977e-07	0.00645004	1.50103e-06	0.010456	4.91771e-07	0.00342561	4.01465e-07	0.00324148	1.31861e-07	0.00106467
9400	26	2.52639e-07	0.00217544	8.49291e-08	0.000731313	2.40625e-06	0.0175524	7.84051e-07	0.00571927	1.8791e-06	0.0114134	6.13263e-07	0.00372488	2.68258e-06	0.0198343	8.73549e-07	0.00645879	1.50102e-06	0.010471	4.91768e-07	0.00343053	3.88527e-07	0.00324541	1.27612e-07	0.00106596
9410	26	2.56993e-07	0.002178	8.63929e-08	0.000732174	2.40724e-06	0.0175765	7.84374e-07	0.00572712	1.88575e-06	0.0114322	6.15432e-07	0.00373102	2.67358e-06	0.0198611	8.70616e-07	0.00646751	1.50356e-06	0.010486	4.92599e-07	0.00343545	3.87038e-07	0.00324931	1.27123e-07	0.00106724
9420	26	2.65879e-07	0.0021806	8.93802e-08	0.000733049	2.41639e-06	0.0176006	7.87355e-07	0.00573497	1.8917e-06	0.0114511	6.17375e-07	0.00373718	2.66684e-06	0.0198878	8.68422e-07	0.00647621	1.50688e-06	0.0105011	4.93686e-07	0.00344038	3.95459e-07	0.00325321	1.29889e-07	0.00106852
9430	26	2.72171e-07	0.0021833	9.14954e-08	0.000733958	2.42287e-06	0.0176248	7.89467e-07	0.00574286	1.88406e-06	0.01147	6.14881e-07	0.00374335	2.66904e-06	0.0199145	8.6914e-07	0.0064849	1.50241e-06	0.0105161	4.92222e-07	0.00344531	4.06196e-07	0.00325724	1.33415e-07	0.00106984
9440	26	2.7685e-07	0.00218604	9.30681e-08	0.000734877	2.42168e-06	0.017649	7.89079e-07	0.00575074	1.8917e-06	0.0114889	6.17376e-07	0.00374951	2.67007e-06	0.0199412	8.69475e-07	0.00649359	1.50101e-06	0.0105311	4.91763e-07	0.00345023	4.12499e-07	0.00326131	1.35486e-07	0.00107118
9450	26	2.79065e-07	0.00218882	9.38128e-08	0.000735811	2.40878e-06	0.0176732	7.84875e-07	0.00575861	1.88994e-06	0.0115078	6.16802e-07	0.00375568	2.6693e-06	0.0199679	8.69225e-07	0.00650228	1.50429e-06	0.0105462	4.9284e-07	0.00345515	4.12037e-07	0.00326544	1.35334e-07	0.00107253
9460	26	2.77705e-07	0.00219159	9.33555e-08	0.000736744	2.40989e-06	0.0176973	7.85236e-07	0.00576647	1.88961e-06	0.0115267	6.16694e-07	0.00376185	2.66399e-06	0.0199945	8.67495e-07	0.00651096	1.50383e-06	0.0105612	4.92688e-07	0.00346008	4.15404e-07	0.00326959	1.3644e-07	0.0010739
9470	26	2.74934e-07	0.00219436	9.24239e-08	0.000737675	2.41735e-06	0.0177214	7.87668e-07	0.00577433	1.89075e-06	0.0115456	6.17065e-07	0.00376802	2.65662e-06	0.0200211	8.65094e-07	0.00651963	1.50167e-06	0.0105762	4.9198e-07	0.003465	4.20509e-07	0.00327375	1.38116e-07	0.00107526
9480	26	2.7344e-07	0.0021971	9.19218e-08	0.000738596	2.4229e-06	0.0177456	7.89474e-07	0.00578222	1.89079e-06	0.0115645	6.17077e-07	0.00377419	2.64089e-06	0.0200476	8.59971e-07	0.00652823	1.50401e-06	0.0105913	4.92746e-07	0.00346993	4.2354e-07	0.00327798	1.39112e-07	0.00107665
9490	26	2.68666e-07	0.0021998	9.0317e-08	0.000739503	2.42604e-06	0.0177699	7.905e-07	0.00579012	1.89725e-06	0.0115834	6.19187e-07	0.00378037	2.6268e-06	0.0200739	8.55384e-07	0.00653683	1.50825e-06	0.0106063	4.94136e-07	0.00347486	4.28779e-07	0.00328223	1.40832e-07	0.00107805
9500	26	2.62636e-07	0.00220247	8.82899e-08	0.000740402	2.41771e-06	0.0177941	7.87785e-07	0.00579801	1.90368e-06	0.0116024	6.21286e-07	0.00378657	2.6263e-06	0.0201002	8.5522e-07	0.00654538	1.51925e-06	0.0106215	4.97739e-07	0.00347982	4.44208e-07	0.00328659	1.459e-07	0.00107948
9510	26	2.67373e-07	0.00220515	8.98824e-08	0.0007413	2.41723e-06	0.0178183	7.87629e-07	0.00580588	1.90698e-06	0.0116215	6.22363e-07	0.00379279	2.6428e-06	0.0201266	8.60594e-07	0.00655397	1.51331e-06	0.0106366	4.95792e-07	0.00348479	4.421e-07	0.00329102	1.45208e-07	0.00108094
9520	26	2.7392e-07	0.00220783	9.20833e-08	0.000742204	2.41924e-06	0.0178424	7.88282e-07	0.00581376	1.90842e-06	0.0116406	6.22833e-07	0.00379902	2.65311e-06	0.0201531	8.63953e-07	0.00656259	1.516e-06	0.0106518	4.96673e-07	0.00348975	4.37091e-07	0.00329542	1.43563e-07	0.00108238
9530	26	2.86797e-07	0.00221065	9.64119e-08	0.00074315	2.41809e-06	0.0178666	7.87907e-07	0.00582164	1.90704e-06	0.0116596	6.22381e-07	0.00380524	2.65775e-06	0.0201796	8.65464e-07	0.00657124	1.52139e-06	0.010667	4.9844e-07	0.00349473	4.3549e-07	0.00329979	1.43037e-07	0.00108382
9540	26	2.89083e-07	0.00221352	9.71805e-08	0.000744115	2.4139e-06	0.0178908	7.86542e-07	0.00582952	1.9033e-06	0.0116787	6.21162e-07	0.00381146	2.65852e-06	0.0202062	8.65715e-07	0.00657989	1.52563e-06	0.0106822	4.9983e-07	0.00349972	4.37015e-07	0.00330415	1.43538e-07	0.00108525
9550	26	2.84489e-07	0.00221638	9.56363e-08	0.000745078	2.41047e-06	0.0179149	7.85426e-07	0.00583738	1.89616e-06	0.0116977	6.1883e-07	0.00381765	2.64897e-06	0.0202327	8.62604e-07	0.00658853	1.52189e-06	0.0106974	4.98605e-07	0.00350471	4.35753e-07	0.00330851	1.43123e-07	0.00108668
9560	26	2.78993e-07	0.00221921	9.37886e-08	0.000746027	2.41081e-06	0.017939	7.85537e-07	0.00584523	1.88898e-06	0.0117166	6.16489e-07	0.00382383	2.63682e-06	0.0202591	8.58648e-07	0.00659714	1.51899e-06	0.0107126	4.97655e-07	0.00350969	4.30128e-07	0.00331284	1.41276e-07	0.0010881
9570	26	2.76944e-07	0.00222198	9.30999e-08	0.000746961	2.41524e-06	0.0179631	7.8698e-07	0.00585309	1.88747e-06	0.0117355	6.15996e-07	0.00383	2.62752e-06	0.0202855	8.55619e-07	0.00660571	1.51992e-06	0.0107278	4.97958e-07	0.00351467	4.20493e-07	0.00331709	1.38111e-07	0.0010895
9580	26	2.70611e-07	0.00222473	9.0971e-08	0.000747883	2.41519e-06	0.0179873	7.86962e-07	0.00586096	1.90115e-06	0.0117544	6.20459e-07	0.00383618	2.63186e-06	0.0203118	8.57033e-07	0.00661427	1.52302e-06	0.010743	4.98974e-07	0.00351965	4.17062e-07	0.00332128	1.36984e-07	0.00109088
9590	26	2.67926e-07	0.00222742	9.00684e-08	0.000748788	2.41712e-06	0.0180115	7.87593e-07	0.00586884	1.91077e-06	0.0117735	6.236e-07	0.0038424	2.6278e-06	0.0203381	8.55709e-07	0.00662283	1.51937e-06	0.0107582	4.97779e-07	0.00352463	4.17049e-07	0.00332546	1.3698e-07	0.00109225
9600	26	2.67331e-07	0.0022301	8.98684e-08	0.000749688	2.41044e-06	0.0180356	7.85415e-07	0.00587669	1.9147e-06	0.0117926	6.24881e-07	0.00384864	2.62641e-06	0.0203643	8.55257e-07	0.00663139	1.51878e-06	0.0107734	4.97586e-07	0.00352961	4.13722e-07	0.0033296	1.35887e-07	0.00109361
9610	26	2.6749e-07	0.00223277	8.99215e-08	0.000750587	2.39737e-06	0.0180596	7.81156e-07	0.00588453	1.91527e-06	0.0118118	6.25067e-07	0.00385489	2.62694e-06	0.0203906	8.55431e-07	0.00663994	1.52253e-06	0.0107886	4.98813e-07	0.0035346	4.09185e-07	0.00333372	1.34397e-07	0.00109496
9620	26	2.68239e-07	0.00223545	9.01735e-08	0.000751488	2.39182e-06	0.0180836	7.79347e-07	0.00589233	1.92429e-06	0.011831	6.28011e-07	0.00386117	2.62252e-06	0.0204168	8.5399e-07	0.00664849	1.53387e-06	0.0108039	5.02528e-07	0.00353961	4.15545e-07	0.00333786	1.36486e-07	0.00109632
9630	26	2.66566e-07	0.00223812	8.9611e-08	0.000752386	2.38818e-06	0.0181075	7.78161e-07	0.00590012	1.93041e-06	0.0118502	6.3001e-07	0.00386745	2.6175e-06	0.0204431	8.52355e-07	0.00665702	1.54422e-06	0.0108193	5.05919e-07	0.00354464	4.18251e-07	0.00334201	1.37375e-07	0.00109768
9640	26	2.58043e-07	0.00224074	8.6746e-08	0.000753266	2.38757e-06	0.0181314	7.77963e-07	0.00590791	1.92387e-06	0.0118695	6.27875e-07	0.00387374	2.6143e-06	0.0204692	8.51314e-07	0.00666554	1.54227e-06	0.0108347	5.05282e-07	0.00354969	4.04674e-07	0.00334612	1.32915e-07	0.00109903
9650	26	2.51522e-07	0.00224329	8.45536e-08	0.000754121	2.3961e-06	0.0181553	7.80743e-07	0.0059157	1.92382e-06	0.0118888	6.27858e-07	0.00388001	2.61283e-06	0.0204954	8.50836e-07	0.00667405	1.53372e-06	0.0108501	5.02479e-07	0.00355473	4.00333e-07	0.00335014	1.3149e-07	0.00110036
9660	26	2.46045e-07	0.00224577	8.27126e-08	0.000754957	2.4062e-06	0.0181793	7.84034e-07	0.00592353	1.92328e-06	0.011908	6.27683e-07	0.00388629	2.62379e-06	0.0205215	8.54403e-07	0.00668258	1.53009e-06	0.0108654	5.01292e-07	0.00355975	4.00808e-07	0.00335415	1.31646e-07	0.00110167
9670	26	2.44427e-07	0.00224823	8.21686e-08	0.000755785	2.41369e-06	0.0182034	7.86474e-07	0.00593138	1.91774e-06	0.0119272	6.25872e-07	0.00389256	2.63124e-06	0.0205478	8.56831e-07	0.00669113	1.52574e-06	0.0108807	4.99865e-07	0.00356476	4.04282e-07	0.00335818	1.32787e-07	0.001103
9680	26	2.4682e-07	0.00225069	8.2973e-08	0.00075661	2.41505e-06	0.0182275	7.86918e-07	0.00593924	1.90651e-06	0.0119463	6.2221e-07	0.0038988	2.6301e-06	0.0205741	8.56457e-07	0.0066997	1.51994e-06	0.0108959	4.97965e-07	0.00356975	4.10422e-07	0.00336226	1.34803e-07	0.00110433
9690	26	2.46256e-07	0.00225315	8.27836e-08	0.000757439	2.40457e-06	0.0182516	7.83502e-07	0.0059471	1.89807e-06	0.0119653	6.19455e-07	0.00390501	2.62424e-06	0.0206004	8.54551e-07	0.00670825	1.51797e-06	0.0109111	4.97319e-07	0.00357472	4.17027e-07	0.00336639	1.36973e-07	0.00110569
9700	26	2.44589e-07	0.00225561	8.2223e-08	0.000758263	2.39773e-06	0.0182756	7.81275e-07	0.00595492	1.8979e-06	0.0119843	6.19398e-07	0.0039112	2.61713e-06	0.0206266	8.52234e-07	0.00671679	1.51906e-06	0.0109263	4.97679e-07	0.0035797	4.14131e-07	0.00337053	1.36021e-07	0.00110705
9710	26	2.39453e-07	0.00225802	8.04965e-08	0.000759075	2.39502e-06	0.0182996	7.80392e-07	0.00596273	1.90329e-06	0.0120033	6.21159e-07	0.00391741	2.61166e-06	0.0206527	8.50456e-07	0.0067253	1.52291e-06	0.0109415	4.98938e-07	0.00358468	4.06532e-07	0.00337464	1.33525e-07	0.0011084
9720	26	2.30991e-07	0.00226037	7.76518e-08	0.000759866	2.39432e-06	0.0183236	7.80162e-07	0.00597053	1.91303e-06	0.0120224	6.24338e-07	0.00392364	2.6104e-06	0.0206788	8.50044e-07	0.00673381	1.52928e-06	0.0109568	5.01027e-07	0.00358968	3.98974e-07	0.00337866	1.31043e-07	0.00110972
9730	26	2.34334e-07	0.00226271	7.87756e-08	0.000760652	2.39358e-06	0.0183475	7.79923e-07	0.00597833	1.92354e-06	0.0120416	6.27767e-07	0.0039299	2.61609e-06	0.020705	8.51898e-07	0.00674232	1.53198e-06	0.0109721	5.0191e-07	0.0035947	3.97174e-07	0.00338265	1.30452e-07	0.00111103
9740	26	2.39903e-07	0.00226507	8.06477e-08	0.000761445	2.39435e-06	0.0183714	7.80174e-07	0.00598613	1.93164e-06	0.0120609	6.30409e-07	0.00393618	2.61533e-06	0.0207311	8.51649e-07	0.00675083	1.5309e-06	0.0109874	5.01557e-07	0.00359971	3.93275e-07	0.0033866	1.29171e-07	0.00111233
9750	26	2.4593e-07	0.0022675	8.2674e-08	0.000762263	2.3972e-06	0.0183954	7.81102e-07	0.00599394	1.93137e-06	0.0120802	6.30322e-07	0.00394249	2.60263e-06	0.0207572	8.47515e-07	0.00675933	1.52664e-06	0.0110027	5.00162e-07	0.00360472	3.89143e-07	0.00339051	1.27814e-07	0.00111362
9760	26	2.53503e-07	0.00227	8.52197e-08	0.000763103	2.39834e-06	0.0184194	7.81473e-07	0.00600175	1.92674e-06	0.0120995	6.28812e-07	0.00394878	2.59013e-06	0.0207832	8.43445e-07	0.00676778	1.52177e-06	0.0110179	4.98566e-07	0.00360971	3.91947e-07	0.00339442	1.28735e-07	0.0011149
9770	26	2.58678e-07	0.00227256	8.69594e-08	0.000763963	2.39794e-06	0.0184434	7.81343e-07	0.00600957	1.92823e-06	0.0121187	6.29299e-07	0.00395507	2.58004e-06	0.020809	8.40157e-07	0.0067762	1.51285e-06	0.0110331	4.95643e-07	0.00361469	3.95444e-07	0.00339836	1.29884e-07	0.00111619
9780	26	2.69895e-07	0.00227521	9.073e-08	0.000764853	2.39496e-06	0.0184673	7.80372e-07	0.00601737	1.92333e-06	0.012138	6.27697e-07	0.00396135	2.57605e-06	0.0208348	8.38858e-07	0.00678459	1.50894e-06	0.0110482	4.94361e-07	0.00361964	3.93944e-07	0.0034023	1.29391e-07	0.00111749
9790	26	2.78635e-07	0.00227795	9.36683e-08	0.000765775	2.39456e-06	0.0184913	7.80243e-07	0.00602518	1.91902e-06	0.0121572	6.26292e-07	0.00396763	2.56948e-06	0.0208605	8.3672e-07	0.00679297	1.50427e-06	0.0110633	4.92832e-07	0.00362457	3.95501e-07	0.00340625	1.29902e-07	0.00111878
9800	26	2.84697e-07	0.00228077	9.5706e-08	0.000766722	2.3944e-06	0.0185152	7.80188e-07	0.00603298	1.9192e-06	0.0121764	6.26352e-07	0.00397389	2.55711e-06	0.0208862	8.32691e-07	0.00680132	1.49988e-06	0.0110783	4.91395e-07	0.0036295	4.05055e-07	0.00341026	1.3304e-07	0.0011201
9810	26	2.89138e-07	0.00228363	9.71989e-08	0.000767684	2.39382e-06	0.0185392	7.79999e-07	0.00604078	1.91897e-06	0.0121956	6.26276e-07	0.00398015	2.55189e-06	0.0209117	8.30989e-07	0.00680964	1.51179e-06	0.0110934	4.95295e-07	0.00363443	4.1432e-07	0.00341436	1.36084e-07	0.00112145
9820	26	2.84755e-07	0.0022865	9.57255e-08	0.000768649	2.39308e-06	0.0185631	7.79757e-07	0.00604858	1.9083e-06	0.0122147	6.22793e-07	0.00398639	2.55344e-06	0.0209372	8.31494e-07	0.00681795	1.52438e-06	0.0111086	4.99421e-07	0.0036394	4.21568e-07	0.00341854	1.38464e-07	0.00112282
9830	26	2.7842e-07	0.00228931	9.35959e-08	0.000769593	2.39266e-06	0.018587	7.79622e-07	0.00605638	1.89472e-06	0.0122337	6.1836e-07	0.00399261	2.55838e-06	0.0209628	8.33104e-07	0.00682627	1.53356e-06	0.0111238	5.02426e-07	0.00364441	4.27439e-07	0.00342278	1.40392e-07	0.00112421
9840	26	2.81507e-07	0.00229212	9.46338e-08	0.000770537	2.39288e-06	0.0186109	7.79693e-07	0.00606417	1.89083e-06	0.0122527	6.17092e-07	0.00399878	2.56309e-06	0.0209884	8.34638e-07	0.00683461	1.53717e-06	0.0111392	5.03611e-07	0.00364944	4.32566e-07	0.00342708	1.42077e-07	0.00112563
9850	26	2.90421e-07	0.00229497	9.76302e-08	0.000771497	2.39177e-06	0.0186349	7.79331e-07	0.00607197	1.89634e-06	0.0122716	6.18891e-07	0.00400496	2.56515e-06	0.021014	8.35309e-07	0.00684296	1.5325e-06	0.0111545	5.0208e-07	0.00365447	4.25913e-07	0.00343137	1.39891e-07	0.00112703
9860	26	2.92441e-07	0.00229789	9.83093e-08	0.000772478	2.39137e-06	0.0186588	7.79201e-07	0.00607976	1.90157e-06	0.0122906	6.20598e-07	0.00401116	2.56565e-06	0.0210397	8.35472e-07	0.00685131	1.53474e-06	0.0111699	5.02814e-07	0.00365949	4.1976e-07	0.00343559	1.3787e-07	0.00112842
9870	26	2.99596e-07	0.00230085	1.00715e-07	0.000773475	2.39306e-06	0.0186827	7.79753e-07	0.00608756	1.90158e-06	0.0123096	6.20601e-07	0.00401737	2.56833e-06	0.0210654	8.36346e-07	0.00685968	1.54293e-06	0.0111853	5.05498e-07	0.00366454	4.23341e-07	0.00343982	1.39047e-07	0.00112981
9880	26	3.04807e-07	0.00230388	1.02466e-07	0.000774492	2.39566e-06	0.0187067	7.80599e-07	0.00609536	1.8988e-06	0.0123286	6.19692e-07	0.00402357	2.57547e-06	0.0210911	8.3867e-07	0.00686805	1.55025e-06	0.0112007	5.07895e-07	0.0036696	4.35197e-07	0.0034441	1.42941e-07	0.00113122
9890	26	3.05926e-07	0.00230692	1.02843e-07	0.000775514	2.39517e-06	0.0187306	7.8044e-07	0.00610316	1.90091e-06	0.0123476	6.2038e-07	0.00402977	2.59114e-06	0.0211169	8.43771e-07	0.00687647	1.55461e-06	0.0112163	5.09326e-07	0.00367469	4.44362e-07	0.00344851	1.45951e-07	0.00113266
9900	26	3.00098e-07	0.00230995	1.00884e-07	0.000776532	2.38801e-06	0.0187545	7.78107e-07	0.00611095	1.90096e-06	0.0123666	6.20397e-07	0.00403597	2.59738e-06	0.0211429	8.45803e-07	0.00688491	1.55626e-06	0.0112318	5.09865e-07	0.00367978	4.49769e-07	0.00345297	1.47727e-07	0.00113413
9910	26	2.97864e-07	0.00231295	1.00132e-07	0.000777542	2.38202e-06	0.0187784	7.76154e-07	0.00611873	1.90485e-06	0.0123857	6.21669e-07	0.00404219	2.59789e-06	0.0211689	8.45971e-07	0.00689337	1.56087e-06	0.0112474	5.11376e-07	0.00368489	4.44125e-07	0.00345742	1.45873e-07	0.00113559
9920	26	2.98516e-07	0.00231593	1.00352e-07	0.000778543	2.37957e-06	0.0188022	7.75357e-07	0.00612649	1.91085e-06	0.0124047	6.23625e-07	0.00404841	2.59691e-06	0.0211948	8.4565e-07	0.00690183	1.56861e-06	0.011263	5.13912e-07	0.00369002	4.34662e-07	0.00346182	1.42765e-07	0.00113704
9930	26	2.94404e-07	0.00231889	9.89694e-08	0.000779538	2.38344e-06	0.018826	7.76617e-07	0.00613425	1.90767e-06	0.0124238	6.22586e-07	0.00405464	2.58835e-06	0.0212207	8.42865e-07	0.00691027	1.57284e-06	0.0112787	5.15296e-07	0.00369516	4.38995e-07	0.0034662	1.44188e-07	0.00113848
9940	26	2.92357e-07	0.00232184	9.82812e-08	0.000780529	2.38682e-06	0.0188498	7.77718e-07	0.00614202	1.90468e-06	0.0124429	6.21612e-07	0.00406087	2.57964e-06	0.0212466	8.40029e-07	0.00691869	1.57214e-06	0.0112945	5.15069e-07	0.00370031	4.41663e-07	0.00347059	1.45064e-07	0.00113992
9950	26	2.9527e-07	0.00232477	9.92603e-08	0.000781515	2.38687e-06	0.0188737	7.77737e-07	0.00614979	1.90577e-06	0.012462	6.21968e-07	0.00406708	2.57383e-06	0.0212724	8.38135e-07	0.00692708	1.56577e-06	0.0113102	5.12979e-07	0.00370545	4.36231e-07	0.00347498	1.4328e-07	0.00114136
9960	26	2.91741e-07	0.0023277	9.8074e-08	0.000782498	2.37669e-06	0.0188975	7.74419e-07	0.00615755	1.91016e-06	0.012481	6.234e-07	0.00407331	2.57546e-06	0.0212981	8.38668e-07	0.00693547	1.56428e-06	0.0113258	5.12492e-07	0.00371058	4.39305e-07	0.00347937	1.4429e-07	0.0011428
9970	26	2.86917e-07	0.00233059	9.64522e-08	0.000783472	2.3675e-06	0.0189212	7.71422e-07	0.00616528	1.91273e-06	0.0125001	6.2424e-07	0.00407955	2.57639e-06	0.0213239	8.38968e-07	0.00694385	1.55997e-06	0.0113414	5.11079e-07	0.0037157	4.4056e-07	0.00348376	1.44702e-07	0.00114424
9980	26	2.81778e-07	0.00233344	9.47248e-08	0.00078443	2.36312e-06	0.0189449	7.69996e-07	0.00617299	1.91114e-06	0.0125193	6.2372e-07	0.00408579	2.5738e-06	0.0213496	8.38126e-07	0.00695224	1.54923e-06	0.011357	5.07563e-07	0.0037208	4.36061e-07	0.00348815	1.43224e-07	0.00114569
9990	26	2.79033e-07	0.00233624	9.38021e-08	0.000785372	2.3541e-06	0.0189685	7.67059e-07	0.00618067	1.91349e-06	0.0125384	6.24488e-07	0.00409203	2.56857e-06	0.0213753	8.36422e-07	0.00696061	1.54701e-06	0.0113725	5.06833e-07	0.00372587	4.32538e-07	0.00349249	1.42067e-07	0.00114711
10000	26	2.76804e-07	0.00233902	9.30529e-08	0.000786306	2.35012e-06	0.018992	7.65761e-07	0.00618834	1.91382e-06	0.0125575	6.24594e-07	0.00409828	2.56644e-06	0.021401	8.35729e-07	0.00696897	1.54252e-06	0.0113879	5.05363e-07	0.00373093	4.36922e-07	0.00349685	1.43507e-07	0.00114854
10010	26	2.77098e-07	0.0023418	9.31514e-08	0.000787239	2.35022e-06	0.0190155	7.65792e-07	0.00619599	1.91701e-06	0.0125767	6.25635e-07	0.00410453	2.56694e-06	0.0214267	8.35892e-07	0.00697733	1.53791e-06	0.0114033	5.03852e-07	0.00373598	4.43834e-07	0.00350124	1.45778e-07	0.00114998
10020	26	2.84204e-07	0.00234461	9.55406e-08	0.000788183	2.35069e-06	0.019039	7.65945e-07	0.00620365	1.93405e-06	0.012596	6.31197e-07	0.00411082	2.56786e-06	0.0214524	8.36191e-07	0.00698569	1.54055e-06	0.0114187	5.04718e-07	0.00374102	4.40312e-07	0.00350566	1.44621e-07	0.00115144
10030	26	2.88099e-07	0.00234747	9.68499e-08	0.000789143	2.35989e-06	0.0190626	7.68946e-07	0.00621132	1.94039e-06	0.0126153	6.33265e-07	0.00411714	2.57224e-06	0.021478	8.37617e-07	0.00699406	1.54687e-06	0.0114341	5.0679e-07	0.00374607	4.50655e-07	0.00351011	1.48018e-07	0.0011529
10040	26	2.92155e-07	0.00235037	9.82134e-08	0.000790121	2.37228e-06	0.0190862	7.72983e-07	0.00621904	1.9377e-06	0.0126347	6.32387e-07	0.00412346	2.56639e-06	0.0215037	8.35713e-07	0.00700242	1.54879e-06	0.0114496	5.07419e-07	0.00375115	4.63661e-07	0.00351469	1.5229e-07	0.0011544
10050	26	2.94209e-07	0.0023533	9.89039e-08	0.000791105	2.38178e-06	0.01911	7.76075e-07	0.00622678	1.933e-06	0.0126541	6.30855e-07	0.00412978	2.55909e-06	0.0215294	8.33336e-07	0.00701077	1.5502e-06	0.0114651	5.07879e-07	0.00375622	4.69635e-07	0.00351935	1.54252e-07	0.00115593
10060	26	2.91708e-07	0.00235622	9.8063e-08	0.000792088	2.38548e-06	0.0191338	7.77283e-07	0.00623455	1.9286e-06	0.0126734	6.29418e-07	0.00413608	2.55512e-06	0.0215549	8.32044e-07	0.00701909	1.55298e-06	0.0114806	5.08791e-07	0.00376131	4.65194e-07	0.00352401	1.52793e-07	0.00115746
10070	26	2.83472e-07	0.0023591	9.52943e-08	0.000793054	2.3805e-06	0.0191576	7.75661e-07	0.00624231	1.92957e-06	0.0126927	6.29735e-07	0.00414238	2.55626e-06	0.0215805	8.32414e-07	0.00702742	1.5563e-06	0.0114962	5.09878e-07	0.0037664	4.5066e-07	0.00352859	1.4802e-07	0.00115897
10080	26	2.74815e-07	0.00236189	9.23842e-08	0.000793993	2.37433e-06	0.0191814	7.7365e-07	0.00625006	1.93409e-06	0.012712	6.31211e-07	0.00414868	2.55481e-06	0.021606	8.31941e-07	0.00703574	1.55777e-06	0.0115117	5.10359e-07	0.0037715	4.38079e-07	0.00353304	1.43887e-07	0.00116043
10090	26	2.68987e-07	0.00236462	9.0425e-08	0.00079491	2.37022e-06	0.0192052	7.7231e-07	0.00625779	1.94049e-06	0.0127314	6.33299e-07	0.004155	2.54922e-06	0.0216316	8.30122e-07	0.00704405	1.55978e-06	0.0115273	5.11019e-07	0.00377661	4.35279e-07	0.00353742	1.42968e-07	0.00116187
10100	26	2.70865e-07	0.00236732	9.10562e-08	0.000795818	2.37106e-06	0.0192289	7.72584e-07	0.00626551	1.94559e-06	0.0127508	6.34965e-07	0.00416135	2.54185e-06	0.021657	8.27723e-07	0.00705233	1.57092e-06	0.011543	5.14668e-07	0.00378174	4.5398e-07	0.00354188	1.4911e-07	0.00116333
10110	26	2.76119e-07	0.00237006	9.28226e-08	0.000796739	2.37234e-06	0.0192526	7.73002e-07	0.00627324	1.95188e-06	0.0127703	6.37016e-07	0.00416771	2.5369e-06	0.0216824	8.26109e-07	0.0070606	1.57482e-06	0.0115587	5.15946e-07	0.00378689	4.66031e-07	0.00354647	1.53068e-07	0.00116484
10120	26	2.85298e-07	0.00237286	9.59082e-08	0.000797681	2.37152e-06	0.0192763	7.72735e-07	0.00628097	1.95235e-06	0.0127898	6.37169e-07	0.00417408	2.53452e-06	0.0217078	8.25335e-07	0.00706886	1.57475e-06	0.0115745	5.15923e-07	0.00379205	4.68167e-07	0.00355113	1.5377e-07	0.00116637
10130	26	2.98006e-07	0.00237577	1.0018e-07	0.00079866	2.37131e-06	0.0193	7.72665e-07	0.0062887	1.94579e-06	0.0128093	6.3503e-07	0.00418044	2.53495e-06	0.0217331	8.25475e-07	0.00707712	1.57507e-06	0.0115902	5.16027e-07	0.00379721	4.63807e-07	0.0035558	1.52338e-07	0.0011679
10140	26	3.07243e-07	0.0023788	1.03285e-07	0.000799676	2.38355e-06	0.0193238	7.76655e-07	0.00629644	1.9572e-06	0.0128288	6.38753e-07	0.00418681	2.53854e-06	0.0217585	8.26642e-07	0.00708538	1.56619e-06	0.0116059	5.13116e-07	0.00380235	4.61068e-07	0.00356042	1.51438e-07	0.00116942
10150	26	3.18399e-07	0.00238194	1.07036e-07	0.000800732	2.38347e-06	0.0193476	7.76628e-07	0.00630421	1.95078e-06	0.0128483	6.36656e-07	0.00419318	2.53591e-06	0.0217839	8.25786e-07	0.00709364	1.55916e-06	0.0116215	5.10815e-07	0.00380747	4.64304e-07	0.00356505	1.52501e-07	0.00117094
10160	26	3.30016e-07	0.00238519	1.10941e-07	0.000801824	2.37504e-06	0.0193714	7.73879e-07	0.00631196	1.94367e-06	0.0128678	6.34338e-07	0.00419953	2.53505e-06	0.0218092	8.25509e-07	0.0071019	1.55088e-06	0.0116371	5.08101e-07	0.00381256	4.67972e-07	0.00356972	1.53706e-07	0.00117247
10170	26	3.40386e-07	0.00238853	1.14427e-07	0.000802947	2.36353e-06	0.0193951	7.70129e-07	0.00631968	1.9373e-06	0.0128872	6.32257e-07	0.00420587	2.53706e-06	0.0218346	8.26162e-07	0.00711015	1.54553e-06	0.0116526	5.06348e-07	0.00381764	4.75268e-07	0.00357443	1.56102e-07	0.00117402
10180	26	3.46603e-07	0.00239195	1.16517e-07	0.000804099	2.35741e-06	0.0194187	7.68135e-07	0.00632737	1.93171e-06	0.0129065	6.30434e-07	0.00421218	2.54201e-06	0.02186	8.27773e-07	0.00711842	1.54972e-06	0.011668	5.07723e-07	0.00382271	4.92508e-07	0.00357925	1.61764e-07	0.00117561
10190	26	3.51165e-07	0.00239544	1.1805e-07	0.000805272	2.36195e-06	0.0194423	7.69616e-07	0.00633506	1.93305e-06	0.0129259	6.3087e-07	0.00421849	2.53444e-06	0.0218853	8.25308e-07	0.00712669	1.5408e-06	0.0116835	5.04799e-07	0.00382777	5.07303e-07	0.00358425	1.66624e-07	0.00117725
10200	26	3.53378e-07	0.00239897	1.18795e-07	0.000806458	2.37256e-06	0.019466	7.73071e-07	0.00634279	1.94064e-06	0.0129453	6.33348e-07	0.00422481	2.5316e-06	0.0219107	8.24382e-07	0.00713493	1.53431e-06	0.0116989	5.02672e-07	0.0038328	5.03011e-07	0.00358928	1.65214e-07	0.0011789
10210	26	3.54324e-07	0.0024025	1.19113e-07	0.000807646	2.38173e-06	0.0194898	7.76062e-07	0.00635053	1.94148e-06	0.0129647	6.33622e-07	0.00423115	2.52846e-06	0.021936	8.23362e-07	0.00714317	1.53213e-06	0.0117142	5.01958e-07	0.00383783	5.01969e-07	0.00359433	1.64872e-07	0.00118056
10220	26	3.52418e-07	0.00240604	1.18472e-07	0.000808834	2.38554e-06	0.0195136	7.77303e-07	0.00635829	1.94406e-06	0.0129841	6.34463e-07	0.00423749	2.52328e-06	0.0219612	8.21673e-07	0.0071514	1.541e-06	0.0117296	5.04864e-07	0.00384286	5.14612e-07	0.00359941	1.69024e-07	0.00118223
10230	26	3.46852e-07	0.00240951	1.16601e-07	0.000810002	2.38497e-06	0.0195374	7.77117e-07	0.00636606	1.94991e-06	0.0130036	6.36373e-07	0.00424384	2.5187e-06	0.0219864	8.20185e-07	0.0071596	1.5495e-06	0.0117451	5.07652e-07	0.00384793	5.14325e-07	0.00360454	1.6893e-07	0.00118391
10240	26	3.40321e-07	0.00241297	1.14405e-07	0.000811165	2.38395e-06	0.0195613	7.76783e-07	0.00637383	1.95823e-06	0.0130231	6.3909e-07	0.00425022	2.51429e-06	0.0220116	8.18749e-07	0.0071678	1.55792e-06	0.0117606	5.10408e-07	0.00385301	5.10629e-07	0.00360967	1.67716e-07	0.0011856
10250	26	3.29265e-07	0.00241629	1.10688e-07	0.000812279	2.38221e-06	0.0195851	7.76219e-07	0.0063816	1.96935e-06	0.0130428	6.42718e-07	0.00425664	2.51941e-06	0.0220368	8.20414e-07	0.00717601	1.55337e-06	0.0117761	5.08917e-07	0.00385811	5.07711e-07	0.00361476	1.66758e-07	0.00118727
10260	26	3.23191e-07	0.00241958	1.08646e-07	0.000813386	2.37797e-06	0.0196089	7.74834e-07	0.00638935	1.98216e-06	0.0130625	6.46898e-07	0.00426307	2.527e-06	0.022062	8.22885e-07	0.00718422	1.55152e-06	0.0117916	5.08312e-07	0.0038632	5.00665e-07	0.0036198	1.64444e-07	0.00118892
10270	26	3.29284e-07	0.00242284	1.10695e-07	0.000814483	2.37185e-06	0.0196327	7.7284e-07	0.00639709	1.96433e-06	0.0130822	6.41079e-07	0.0042695	2.53908e-06	0.0220874	8.2682e-07	0.00719247	1.5569e-06	0.0118072	5.10076e-07	0.00386829	4.84607e-07	0.00362472	1.59169e-07	0.00119054
10280	26	3.36153e-07	0.00242617	1.13004e-07	0.000815602	2.35624e-06	0.0196563	7.67754e-07	0.00640479	1.95179e-06	0.0131018	6.36985e-07	0.00427589	2.54847e-06	0.0221128	8.29876e-07	0.00720075	1.55787e-06	0.0118227	5.10391e-07	0.00387339	4.75491e-07	0.00362952	1.56175e-07	0.00119212
10290	26	3.2995e-07	0.00242949	1.10919e-07	0.000816719	2.35453e-06	0.0196799	7.67196e-07	0.00641247	1.94634e-06	0.0131213	6.35209e-07	0.00428226	2.55448e-06	0.0221383	8.31833e-07	0.00720906	1.55455e-06	0.0118383	5.09305e-07	0.00387849	4.7502e-07	0.00363428	1.56021e-07	0.00119368
10300	26	3.25346e-07	0.00243278	1.09371e-07	0.000817824	2.35933e-06	0.0197034	7.68763e-07	0.00642015	1.95132e-06	0.0131408	6.36834e-07	0.00428862	2.55877e-06	0.0221639	8.33231e-07	0.00721739	1.55123e-06	0.0118538	5.08216e-07	0.00388358	4.8359e-07	0.00363909	1.58835e-07	0.00119526
10310	26	3.32093e-07	0.00243606	1.11639e-07	0.000818925	2.35802e-06	0.019727	7.68333e-07	0.00642784	1.95375e-06	0.0131603	6.37626e-07	0.00429499	2.56289e-06	0.0221895	8.34573e-07	0.00722572	1.55024e-06	0.0118693	5.07891e-07	0.00388866	4.9437e-07	0.00364396	1.62376e-07	0.00119686
10320	26	3.36047e-07	0.0024394	1.12968e-07	0.00082005	2.35858e-06	0.0197506	7.68516e-07	0.00643552	1.9548e-06	0.0131798	6.3797e-07	0.00430137	2.56165e-06	0.0222151	8.3417e-07	0.00723407	1.55015e-06	0.0118848	5.07863e-07	0.00389374	4.88988e-07	0.00364886	1.60608e-07	0.00119847
10330	26	3.36747e-07	0.00244276	1.13204e-07	0.000821179	2.35827e-06	0.0197742	7.68416e-07	0.0064432	1.94982e-06	0.0131993	6.36345e-07	0.00430773	2.56155e-06	0.0222407	8.34137e-07	0.00724241	1.55541e-06	0.0119004	5.09587e-07	0.00389882	4.83553e-07	0.00365373	1.58823e-07	0.00120007
10340	26	3.37482e-07	0.00244614	1.13451e-07	0.000822314	2.35663e-06	0.0197978	7.67884e-07	0.00645089	1.94937e-06	0.0132188	6.36197e-07	0.0043141	2.56527e-06	0.0222663	8.35346e-07	0.00725076	1.5613e-06	0.011916	5.11514e-07	0.00390393	4.80472e-07	0.00365855	1.57811e-07	0.00120165
10350	26	3.4139e-07	0.00244953	1.14764e-07	0.000823454	2.35466e-06	0.0198213	7.67241e-07	0.00645856	1.95682e-06	0.0132384	6.38628e-07	0.00432048	2.57019e-06	0.022292	8.36952e-07	0.00725912	1.56078e-06	0.0119316	5.11346e-07	0.00390904	4.81253e-07	0.00366336	1.58068e-07	0.00120323
10360	26	3.38506e-07	0.00245292	1.13795e-07	0.000824595	2.35368e-06	0.0198449	7.66922e-07	0.00646623	1.96787e-06	0.013258	6.42234e-07	0.00432688	2.56504e-06	0.0223177	8.35274e-07	0.00726748	1.56398e-06	0.0119472	5.12395e-07	0.00391416	4.87592e-07	0.00366821	1.6015e-07	0.00120483
10370	26	3.40217e-07	0.00245632	1.1437e-07	0.000825738	2.36043e-06	0.0198684	7.69122e-07	0.00647391	1.98261e-06	0.0132777	6.47045e-07	0.00433333	2.55475e-06	0.0223433	8.31922e-07	0.00727581	1.57197e-06	0.0119629	5.15013e-07	0.0039193	4.86535e-07	0.00367307	1.59803e-07	0.00120642
10380	26	3.44541e-07	0.00245975	1.15824e-07	0.000826889	2.37177e-06	0.0198921	7.72815e-07	0.00648162	1.99456e-06	0.0132976	6.50944e-07	0.00433982	2.5451e-06	0.0223688	8.28779e-07	0.00728412	1.57969e-06	0.0119786	5.1754e-07	0.00392446	4.88806e-07	0.00367796	1.60549e-07	0.00120803
10390	26	3.47031e-07	0.0024632	1.16661e-07	0.00082805	2.38119e-06	0.0199159	7.75884e-07	0.00648936	1.99901e-06	0.0133176	6.52398e-07	0.00434633	2.53983e-06	0.0223942	8.27065e-07	0.0072924	1.58286e-06	0.0119944	5.18579e-07	0.00392964	5.00521e-07	0.00368289	1.64396e-07	0.00120965
10400	26	3.44242e-07	0.00246665	1.15723e-07	0.00082921	2.37895e-06	0.0199397	7.75156e-07	0.00649712	1.99333e-06	0.0133375	6.50545e-07	0.00435284	2.53803e-06	0.0224196	8.26479e-07	0.00730066	1.58088e-06	0.0120103	5.17931e-07	0.00393482	4.99842e-07	0.00368789	1.64173e-07	0.00121129
10410	26	3.41996e-07	0.00247008	1.14968e-07	0.000830363	2.37817e-06	0.0199634	7.74901e-07	0.00650487	1.98514e-06	0.0133574	6.4787e-07	0.00435933	2.54188e-06	0.022445	8.27733e-07	0.00730894	1.57889e-06	0.0120261	5.17277e-07	0.00394	4.89661e-07	0.00369281	1.60829e-07	0.00121291
10420	26	3.40053e-07	0.0024735	1.14315e-07	0.000831511	2.37904e-06	0.0199872	7.75184e-07	0.00651262	1.97655e-06	0.0133773	6.45069e-07	0.0043658	2.54816e-06	0.0224705	8.29777e-07	0.00731722	1.57735e-06	0.0120418	5.16774e-07	0.00394517	4.75314e-07	0.00369768	1.56117e-07	0.0012145
10430	26	3.36483e-07	0.00247688	1.13115e-07	0.000832648	2.38509e-06	0.0200111	7.77154e-07	0.00652038	1.97546e-06	0.013397	6.44712e-07	0.00437225	2.5481e-06	0.0224959	8.29757e-07	0.00732552	1.57908e-06	0.0120576	5.17341e-07	0.00395034	4.6896e-07	0.0037024	1.5403e-07	0.00121605
10440	26	3.33744e-07	0.00248023	1.12194e-07	0.000833774	2.39189e-06	0.0200349	7.79372e-07	0.00652817	1.97651e-06	0.0134168	6.45054e-07	0.0043787	2.5476e-06	0.0225214	8.29593e-07	0.00733382	1.57868e-06	0.0120734	5.17211e-07	0.00395551	4.72262e-07	0.00370711	1.55115e-07	0.0012176
10450	26	3.36941e-07	0.00248359	1.13269e-07	0.000834905	2.38902e-06	0.0200588	7.78438e-07	0.00653595	1.97634e-06	0.0134365	6.44998e-07	0.00438515	2.54538e-06	0.0225469	8.28873e-07	0.00734211	1.5841e-06	0.0120892	5.18987e-07	0.0039607	4.78085e-07	0.00371186	1.57027e-07	0.00121916
10460	26	3.44082e-07	0.00248698	1.1567e-07	0.000836044	2.3767e-06	0.0200827	7.74423e-07	0.00654372	1.97427e-06	0.0134563	6.44322e-07	0.0043916	2.54356e-06	0.0225723	8.28278e-07	0.0073504	1.59197e-06	0.0121051	5.21562e-07	0.00396589	4.81173e-07	0.00371665	1.58041e-07	0.00122073
10470	26	3.37708e-07	0.00249038	1.13527e-07	0.000837189	2.36434e-06	0.0201064	7.70396e-07	0.00655144	1.97086e-06	0.013476	6.43211e-07	0.00439803	2.56069e-06	0.0225979	8.33858e-07	0.00735871	1.5619e-06	0.0121208	5.11712e-07	0.00397105	4.68532e-07	0.00372139	1.53889e-07	0.00122229
10480	26	3.25359e-07	0.0024937	1.09376e-07	0.000838302	2.36395e-06	0.02013	7.70266e-07	0.00655915	1.96792e-06	0.0134957	6.4225e-07	0.00440446	2.56517e-06	0.0226235	8.35317e-07	0.00736705	1.55117e-06	0.0121364	5.08197e-07	0.00397615	4.6022e-07	0.00372603	1.51159e-07	0.00122382
10490	26	3.17561e-07	0.00249691	1.06754e-07	0.000839381	2.36864e-06	0.0201537	7.71795e-07	0.00656686	1.96064e-06	0.0135153	6.39875e-07	0.00441087	2.55929e-06	0.0226491	8.33402e-07	0.00737539	1.54822e-06	0.0121519	5.07229e-07	0.00398123	4.58519e-07	0.00373063	1.50601e-07	0.00122533
10500	26	3.13571e-07	0.00250008	1.05413e-07	0.000840447	2.37333e-06	0.0201774	7.73323e-07	0.00657458	1.95237e-06	0.0135349	6.37177e-07	0.00441726	2.55021e-06	0.0226747	8.30445e-07	0.00738372	1.54644e-06	0.0121674	5.06647e-07	0.0039863	4.59245e-07	0.00373521	1.50839e-07	0.00122683
10510	26	3.17219e-07	0.00250324	1.06639e-07	0.00084151	2.36647e-06	0.0202011	7.71088e-07	0.00658229	1.95705e-06	0.0135545	6.38704e-07	0.00442364	2.54651e-06	0.0227001	8.29239e-07	0.00739201	1.54092e-06	0.0121828	5.04839e-07	0.00399135	4.55858e-07	0.00373978	1.49727e-07	0.00122833
10520	26	3.19965e-07	0.00250642	1.07562e-07	0.00084258	2.35802e-06	0.0202247	7.68336e-07	0.00658999	1.96329e-06	0.0135741	6.40738e-07	0.00443004	2.54e-06	0.0227256	8.27121e-07	0.0074003	1.53561e-06	0.0121982	5.03101e-07	0.00399639	4.53591e-07	0.00374433	1.48982e-07	0.00122983
10530	26	3.21486e-07	0.00250962	1.08073e-07	0.000843656	2.34742e-06	0.0202482	7.64883e-07	0.00659767	1.97163e-06	0.0135937	6.43461e-07	0.00443645	2.52969e-06	0.0227509	8.23761e-07	0.00740856	1.5306e-06	0.0122135	5.01459e-07	0.00400142	4.52848e-07	0.00374887	1.48738e-07	0.00123132
10540	26	3.18913e-07	0.00251282	1.07209e-07	0.000844731	2.34297e-06	0.0202717	7.63432e-07	0.00660531	1.97325e-06	0.0136135	6.43991e-07	0.00444289	2.52862e-06	0.0227762	8.23413e-07	0.00741679	1.53044e-06	0.0122288	5.01404e-07	0.00400643	4.53251e-07	0.0037534	1.48871e-07	0.00123281
10550	26	3.14419e-07	0.00251598	1.05698e-07	0.000845793	2.3388e-06	0.0202951	7.62073e-07	0.00661293	1.96625e-06	0.0136331	6.41706e-07	0.00444931	2.52146e-06	0.0228015	8.21083e-07	0.00742501	1.52795e-06	0.0122441	5.00589e-07	0.00401144	4.55852e-07	0.00375795	1.49725e-07	0.0012343
10560	26	3.07443e-07	0.00251909	1.03353e-07	0.000846838	2.33538e-06	0.0203185	7.60957e-07	0.00662055	1.95234e-06	0.0136527	6.37167e-07	0.00445571	2.51088e-06	0.0228266	8.17638e-07	0.00743321	1.52451e-06	0.0122594	4.99461e-07	0.00401644	4.59001e-07	0.00376252	1.50759e-07	0.0012358
10570	26	2.95586e-07	0.00252211	9.93667e-08	0.000847852	2.33571e-06	0.0203418	7.61065e-07	0.00662816	1.94436e-06	0.0136722	6.34562e-07	0.00446207	2.51531e-06	0.0228518	8.19079e-07	0.00744139	1.52917e-06	0.0122747	5.00988e-07	0.00402145	4.52923e-07	0.00376708	1.48763e-07	0.0012373
10580	26	2.82609e-07	0.002525	9.50042e-08	0.000848824	2.33707e-06	0.0203652	7.61507e-07	0.00663577	1.94302e-06	0.0136917	6.34125e-07	0.00446842	2.52283e-06	0.022877	8.21529e-07	0.0074496	1.53145e-06	0.01229	5.01738e-07	0.00402646	4.43332e-07	0.00377155	1.45612e-07	0.00123877
10590	26	2.71349e-07	0.00252777	9.1219e-08	0.000849756	2.33777e-06	0.0203886	7.61738e-07	0.00664339	1.94589e-06	0.0137111	6.35061e-07	0.00447476	2.52642e-06	0.0229022	8.22697e-07	0.00745782	1.52723e-06	0.0123053	5.00354e-07	0.00403147	4.34712e-07	0.00377595	1.42781e-07	0.00124021
10600	26	2.63751e-07	0.00253044	8.86646e-08	0.000850653	2.33293e-06	0.0204119	7.60158e-07	0.00665099	1.94458e-06	0.0137306	6.34633e-07	0.00448111	2.52832e-06	0.0229275	8.23317e-07	0.00746605	1.52168e-06	0.0123205	4.98535e-07	0.00403646	4.28308e-07	0.00378026	1.40678e-07	0.00124163
10610	26	2.59483e-07	0.00253308	8.72301e-08	0.00085154	2.32561e-06	0.0204352	7.57776e-07	0.00665859	1.94131e-06	0.01375	6.33566e-07	0.00448745	2.52441e-06	0.0229527	8.22041e-07	0.00747427	1.51648e-06	0.0123357	4.96833e-07	0.00404144	4.24224e-07	0.00378454	1.39337e-07	0.00124303
10620	26	2.63431e-07	0.00253569	8.85573e-08	0.00085242	2.31112e-06	0.0204584	7.53054e-07	0.00666614	1.93177e-06	0.0137694	6.30452e-07	0.00449377	2.51604e-06	0.0229779	8.19315e-07	0.00748247	1.51325e-06	0.0123508	4.95775e-07	0.0040464	4.26072e-07	0.00378879	1.39943e-07	0.00124443
10630	26	2.62506e-07	0.00253831	8.82462e-08	0.000853301	2.30939e-06	0.0204815	7.5249e-07	0.00667367	1.93542e-06	0.0137887	6.31644e-07	0.00450009	2.50951e-06	0.0230031	8.1719e-07	0.00749066	1.50902e-06	0.0123659	4.94388e-07	0.00405135	4.31796e-07	0.00379309	1.41823e-07	0.00124584
10640	26	2.60585e-07	0.00254094	8.76004e-08	0.000854183	2.3144e-06	0.0205046	7.54123e-07	0.0066812	1.9397e-06	0.0138081	6.33041e-07	0.00450641	2.51226e-06	0.0230282	8.18086e-07	0.00749884	1.50792e-06	0.012381	4.94027e-07	0.0040563	4.39563e-07	0.00379743	1.44375e-07	0.00124727
10650	26	2.65715e-07	0.00254357	8.93251e-08	0.000855066	2.31827e-06	0.0205278	7.55384e-07	0.00668875	1.94029e-06	0.0138275	6.33234e-07	0.00451274	2.50752e-06	0.0230533	8.16543e-07	0.00750701	1.51808e-06	0.0123962	4.97356e-07	0.00406125	4.45613e-07	0.00380186	1.46362e-07	0.00124872
10660	26	2.74712e-07	0.00254627	9.23495e-08	0.000855977	2.31013e-06	0.0205509	7.52729e-07	0.00669629	1.9368e-06	0.0138469	6.32093e-07	0.00451906	2.49886e-06	0.0230783	8.13722e-07	0.00751516	1.51557e-06	0.0124113	4.96534e-07	0.00406622	4.56244e-07	0.00380637	1.49854e-07	0.0012502
10670	26	2.73241e-07	0.002549	9.18551e-08	0.000856893	2.29608e-06	0.0205739	7.48153e-07	0.00670379	1.92912e-06	0.0138662	6.29588e-07	0.00452537	2.49098e-06	0.0231033	8.11157e-07	0.00752328	1.52352e-06	0.0124265	4.9914e-07	0.00407121	4.63357e-07	0.00381098	1.5219e-07	0.00125172
10680	26	2.67905e-07	0.00255171	9.00613e-08	0.000857804	2.29112e-06	0.0205969	7.46537e-07	0.00671127	1.91939e-06	0.0138854	6.26412e-07	0.00453165	2.49464e-06	0.0231282	8.12348e-07	0.00753141	1.53353e-06	0.0124418	5.02419e-07	0.00407621	4.67016e-07	0.00381562	1.53392e-07	0.00125324
10690	26	2.63823e-07	0.00255437	8.86891e-08	0.000858698	2.29128e-06	0.0206198	7.46589e-07	0.00671873	1.91113e-06	0.0139046	6.23718e-07	0.0045379	2.49853e-06	0.0231531	8.13616e-07	0.00753953	1.53752e-06	0.0124572	5.03727e-07	0.00408124	4.65973e-07	0.00382029	1.53049e-07	0.00125477
10700	26	2.70066e-07	0.00255705	9.07877e-08	0.000859599	2.28909e-06	0.0206427	7.45876e-07	0.00672619	1.91119e-06	0.0139237	6.23736e-07	0.00454414	2.49585e-06	0.0231781	8.12741e-07	0.00754767	1.53581e-06	0.0124725	5.03166e-07	0.00408627	4.51658e-07	0.00382486	1.48347e-07	0.00125628
10710	26	2.7943e-07	0.00255979	9.39354e-08	0.000860521	2.28372e-06	0.0206655	7.44126e-07	0.00673364	1.90738e-06	0.0139428	6.22492e-07	0.00455037	2.50062e-06	0.0232031	8.14294e-07	0.00755581	1.5285e-06	0.0124879	5.0077e-07	0.00409129	4.35719e-07	0.00382931	1.43112e-07	0.00125774
10720	26	2.80549e-07	0.00256259	9.43117e-08	0.000861463	2.27702e-06	0.0206884	7.41943e-07	0.00674107	1.90131e-06	0.0139618	6.20511e-07	0.00455659	2.50121e-06	0.0232281	8.14487e-07	0.00756394	1.51805e-06	0.0125031	4.97347e-07	0.00409628	4.29647e-07	0.00383364	1.41118e-07	0.00125916
10730	26	2.68468e-07	0.00256535	9.02505e-08	0.00086239	2.27846e-06	0.0207111	7.42412e-07	0.00674849	1.90392e-06	0.0139809	6.21364e-07	0.00456279	2.4903e-06	0.0232531	8.10934e-07	0.00757207	1.5107e-06	0.0125182	4.9494e-07	0.00410125	4.31531e-07	0.00383794	1.41737e-07	0.00126057
10740	26	2.66879e-07	0.00256803	8.97163e-08	0.00086329	2.27588e-06	0.0207339	7.4157e-07	0.00675591	1.89898e-06	0.0139999	6.19752e-07	0.004569	2.47829e-06	0.0232779	8.07024e-07	0.00758016	1.51058e-06	0.0125333	4.94899e-07	0.0041062	4.33863e-07	0.00384227	1.42502e-07	0.001262
10750	26	2.7382e-07	0.00257075	9.20498e-08	0.000864203	2.27342e-06	0.0207566	7.40769e-07	0.00676332	1.89165e-06	0.0140188	6.17358e-07	0.00457518	2.466e-06	0.0233027	8.03024e-07	0.00758822	1.50989e-06	0.0125484	4.94673e-07	0.00411115	4.39076e-07	0.00384664	1.44215e-07	0.00126343
10760	26	2.80038e-07	0.0025735	9.41397e-08	0.00086513	2.27403e-06	0.0207794	7.40967e-07	0.00677073	1.87999e-06	0.0140377	6.13553e-07	0.00458134	2.45196e-06	0.0233272	7.98449e-07	0.00759622	1.50747e-06	0.0125635	4.93879e-07	0.00411609	4.48498e-07	0.00385107	1.47309e-07	0.00126489
10770	26	2.7778e-07	0.00257629	9.33809e-08	0.000866068	2.27568e-06	0.0208021	7.41506e-07	0.00677815	1.86219e-06	0.0140564	6.07746e-07	0.00458744	2.44473e-06	0.0233517	7.96094e-07	0.00760419	1.50367e-06	0.0125786	4.92636e-07	0.00412102	4.57499e-07	0.0038556	1.50266e-07	0.00126637
10780	26	2.78968e-07	0.00257908	9.37803e-08	0.000867004	2.26749e-06	0.0208248	7.38838e-07	0.00678555	1.84738e-06	0.0140749	6.02912e-07	0.0045935	2.43887e-06	0.0233761	7.94188e-07	0.00761214	1.50285e-06	0.0125936	4.92365e-07	0.00412595	4.54629e-07	0.00386016	1.49323e-07	0.00126787
10790	26	2.81833e-07	0.00258188	9.47434e-08	0.000867947	2.26066e-06	0.0208475	7.36612e-07	0.00679292	1.84251e-06	0.0140934	6.01321e-07	0.00459952	2.43358e-06	0.0234005	7.92463e-07	0.00762008	1.50071e-06	0.0126086	4.91665e-07	0.00413087	4.53772e-07	0.0038647	1.49042e-07	0.00126936
10800	26	2.82953e-07	0.00258471	9.51197e-08	0.000868896	2.25241e-06	0.02087	7.33923e-07	0.00680027	1.84348e-06	0.0141118	6.0164e-07	0.00460554	2.43242e-06	0.0234248	7.92085e-07	0.007628	1.49792e-06	0.0126236	4.90751e-07	0.00413578	4.54112e-07	0.00386925	1.49153e-07	0.00127086
10810	26	2.81368e-07	0.00258753	9.45871e-08	0.000869844	2.24514e-06	0.0208925	7.31554e-07	0.00680761	1.84596e-06	0.0141303	6.02447e-07	0.00461156	2.43487e-06	0.0234492	7.92884e-07	0.00763593	1.49394e-06	0.0126386	4.89447e-07	0.00414068	4.53369e-07	0.00387378	1.48909e-07	0.00127234
10820	26	2.75368e-07	0.00259031	9.25699e-08	0.000870781	2.24376e-06	0.020915	7.31103e-07	0.00681492	1.84369e-06	0.0141487	6.01707e-07	0.00461758	2.43481e-06	0.0234735	7.92864e-07	0.00764385	1.48721e-06	0.0126535	4.87241e-07	0.00414556	4.46889e-07	0.00387828	1.46781e-07	0.00127382
10830	26	2.79612e-07	0.00259308	9.39967e-08	0.000871713	2.24456e-06	0.0209374	7.31365e-07	0.00682223	1.84337e-06	0.0141672	6.01604e-07	0.00462359	2.42813e-06	0.0234978	7.90691e-07	0.00765178	1.48062e-06	0.0126683	4.85082e-07	0.00415043	4.38761e-07	0.00388272	1.44111e-07	0.00127528
10840	26	2.86238e-07	0.00259593	9.62242e-08	0.000872668	2.24907e-06	0.0209599	7.32834e-07	0.00682956	1.83913e-06	0.0141856	6.00219e-07	0.0046296	2.42269e-06	0.0235221	7.88918e-07	0.00765967	1.48204e-06	0.0126832	4.85548e-07	0.00415528	4.37456e-07	0.0038871	1.43682e-07	0.00127672
10850	26	2.89046e-07	0.0025988	9.71682e-08	0.000873634	2.24851e-06	0.0209824	7.32654e-07	0.00683688	1.83251e-06	0.0142039	5.98058e-07	0.00463559	2.41663e-06	0.0235463	7.86944e-07	0.00766755	1.47685e-06	0.0126979	4.83849e-07	0.00416012	4.33348e-07	0.00389145	1.42333e-07	0.00127815
10860	26	2.89569e-07	0.00260169	9.73438e-08	0.000874606	2.24317e-06	0.0210048	7.30912e-07	0.0068442	1.82539e-06	0.0142222	5.95735e-07	0.00464156	2.41401e-06	0.0235704	7.86093e-07	0.00767542	1.46615e-06	0.0127127	4.80342e-07	0.00416494	4.23585e-07	0.00389572	1.39127e-07	0.00127955
10870	26	2.89734e-07	0.00260459	9.73995e-08	0.000875579	2.23454e-06	0.0210272	7.28099e-07	0.00685149	1.82062e-06	0.0142404	5.94177e-07	0.00464751	2.41359e-06	0.0235946	7.85954e-07	0.00768328	1.45327e-06	0.0127273	4.76122e-07	0.00416973	4.06098e-07	0.00389987	1.33383e-07	0.00128091
10880	26	2.83161e-07	0.00260743	9.51898e-08	0.000876535	2.22527e-06	0.0210495	7.2508e-07	0.00685875	1.81936e-06	0.0142586	5.93766e-07	0.00465345	2.40887e-06	0.0236187	7.84417e-07	0.00769112	1.44591e-06	0.0127418	4.73713e-07	0.00417448	3.90374e-07	0.00390383	1.28219e-07	0.00128221
10890	26	2.74671e-07	0.00261025	9.23357e-08	0.000877484	2.21601e-06	0.0210718	7.22063e-07	0.006866	1.81945e-06	0.0142768	5.93796e-07	0.00465939	2.40831e-06	0.0236428	7.84237e-07	0.00769897	1.44123e-06	0.0127562	4.72177e-07	0.00417921	3.76337e-07	0.00390772	1.23608e-07	0.00128349
10900	26	2.75513e-07	0.002613	9.26188e-08	0.000878409	2.21003e-06	0.0210939	7.20114e-07	0.00687321	1.82011e-06	0.014295	5.94013e-07	0.00466533	2.41356e-06	0.0236669	7.85947e-07	0.00770682	1.44481e-06	0.0127706	4.73353e-07	0.00418394	3.76119e-07	0.00391148	1.23537e-07	0.00128473
10910	26	2.76846e-07	0.00261577	9.30668e-08	0.000879338	2.20701e-06	0.021116	7.19129e-07	0.0068804	1.81952e-06	0.0143132	5.93819e-07	0.00467127	2.42276e-06	0.0236911	7.88942e-07	0.0077147	1.44956e-06	0.0127851	4.74908e-07	0.00418868	3.75249e-07	0.00391523	1.23251e-07	0.00128596
10920	26	2.78337e-07	0.00261854	9.3568e-08	0.00088027	2.20685e-06	0.021138	7.19078e-07	0.0068876	1.81913e-06	0.0143314	5.9369e-07	0.00467721	2.41822e-06	0.0237153	7.87462e-07	0.00772258	1.45351e-06	0.0127996	4.76203e-07	0.00419343	3.71723e-07	0.00391896	1.22092e-07	0.00128719
10930	26	2.79173e-07	0.00262133	9.38491e-08	0.000881208	2.21223e-06	0.0211601	7.20831e-07	0.0068948	1.82341e-06	0.0143496	5.95088e-07	0.00468315	2.41564e-06	0.0237394	7.86622e-07	0.00773045	1.45016e-06	0.0128141	4.75104e-07	0.00419819	3.56981e-07	0.00392259	1.17251e-07	0.00128838
10940	26	2.7751e-07	0.00262411	9.32902e-08	0.000882141	2.21594e-06	0.0211823	7.22041e-07	0.00690201	1.82986e-06	0.0143679	5.97194e-07	0.00468911	2.41636e-06	0.0237636	7.86858e-07	0.00773831	1.45182e-06	0.0128287	4.75647e-07	0.00420295	3.50548e-07	0.00392614	1.15138e-07	0.00128954
10950	26	2.72733e-07	0.00262685	9.16843e-08	0.000883064	2.21875e-06	0.0212044	7.22956e-07	0.00690924	1.83473e-06	0.0143862	5.98784e-07	0.00469509	2.4137e-06	0.0237877	7.85992e-07	0.00774618	1.45527e-06	0.0128432	4.76778e-07	0.00420771	3.4954e-07	0.00392964	1.14807e-07	0.00129069
10960	26	2.63802e-07	0.00262953	8.86819e-08	0.000883964	2.22243e-06	0.0212267	7.24155e-07	0.00691647	1.82986e-06	0.0144045	5.97193e-07	0.00470107	2.40339e-06	0.0238118	7.82632e-07	0.00775402	1.45321e-06	0.0128577	4.76102e-07	0.00421247	3.46998e-07	0.00393312	1.13972e-07	0.00129184
10970	26	2.59852e-07	0.00263217	8.73539e-08	0.000884851	2.22138e-06	0.0212489	7.23811e-07	0.00692371	1.82633e-06	0.0144228	5.96041e-07	0.00470704	2.40163e-06	0.0238359	7.82062e-07	0.00776185	1.45544e-06	0.0128723	4.76833e-07	0.00421724	3.50256e-07	0.00393662	1.15042e-07	0.00129299
10980	26	2.60598e-07	0.00263477	8.76049e-08	0.000885725	2.21067e-06	0.021271	7.20322e-07	0.00693093	1.82813e-06	0.0144411	5.96627e-07	0.004713	2.41532e-06	0.0238599	7.86518e-07	0.00776969	1.46308e-06	0.0128869	4.79337e-07	0.00422202	3.59793e-07	0.00394016	1.18174e-07	0.00129415
10990	26	2.56661e-07	0.00263735	8.62812e-08	0.000886594	2.20157e-06	0.0212931	7.17358e-07	0.00693812	1.83133e-06	0.0144594	5.97673e-07	0.00471898	2.42753e-06	0.0238842	7.90494e-07	0.00777758	1.46636e-06	0.0129015	4.80413e-07	0.00422682	3.51889e-07	0.00394371	1.15578e-07	0.00129531
11000	26	2.51296e-07	0.00263989	8.44777e-08	0.000887448	2.20302e-06	0.0213151	7.17831e-07	0.0069453	1.83913e-06	0.0144778	6.00218e-07	0.00472497	2.42877e-06	0.0239084	7.90898e-07	0.00778548	1.46562e-06	0.0129162	4.80169e-07	0.00423162	3.42911e-07	0.00394718	1.12629e-07	0.00129645
11010	26	2.48212e-07	0.00264239	8.34411e-08	0.000888288	2.20948e-06	0.0213372	7.19935e-07	0.00695249	1.84136e-06	0.0144962	6.00948e-07	0.00473097	2.4229e-06	0.0239327	7.88988e-07	0.00779338	1.45728e-06	0.0129308	4.77436e-07	0.0042364	3.35373e-07	0.00395059	1.10153e-07	0.00129757
11020	26	2.44623e-07	0.00264485	8.22345e-08	0.000889116	2.21816e-06	0.0213593	7.22762e-07	0.0069597	1.84205e-06	0.0145146	6.01171e-07	0.00473698	2.41356e-06	0.0239569	7.85946e-07	0.00780125	1.44612e-06	0.0129453	4.73779e-07	0.00424116	3.32936e-07	0.00395393	1.09353e-07	0.00129867
11030	26	2.36947e-07	0.00264726	7.96541e-08	0.000889926	2.22588e-06	0.0213815	7.25277e-07	0.00696694	1.84667e-06	0.014533	6.02678e-07	0.004743	2.4133e-06	0.023981	7.85861e-07	0.00780912	1.44226e-06	0.0129597	4.72517e-07	0.00424589	3.34825e-07	0.00395727	1.09973e-07	0.00129977
11040	26	2.35352e-07	0.00264963	7.91178e-08	0.00089072	2.23206e-06	0.0214038	7.27293e-07	0.0069742	1.85379e-06	0.0145515	6.05002e-07	0.00474904	2.41653e-06	0.0240051	7.86911e-07	0.00781698	1.44362e-06	0.0129742	4.72962e-07	0.00425062	3.39104e-07	0.00396064	1.11379e-07	0.00130087
11050	26	2.32847e-07	0.00265196	7.82756e-08	0.000891506	2.24123e-06	0.0214262	7.30281e-07	0.00698149	1.86251e-06	0.0145701	6.0785e-07	0.0047551	2.40887e-06	0.0240293	7.84418e-07	0.00782483	1.44207e-06	0.0129886	4.72453e-07	0.00425535	3.4042e-07	0.00396404	1.11811e-07	0.00130199
11060	26	2.30158e-07	0.00265429	7.73718e-08	0.000892287	2.24976e-06	0.0214486	7.3306e-07	0.0069888	1.86863e-06	0.0145888	6.09846e-07	0.00476119	2.40989e-06	0.0240534	7.8475e-07	0.00783268	1.44116e-06	0.013003	4.72155e-07	0.00426007	3.40824e-07	0.00396744	1.11944e-07	0.00130311
11070	26	2.35076e-07	0.00265661	7.90252e-08	0.000893069	2.24381e-06	0.0214711	7.31121e-07	0.00699613	1.86708e-06	0.0146074	6.0934e-07	0.00476729	2.4164e-06	0.0240775	7.86869e-07	0.00784054	1.45463e-06	0.0130175	4.76568e-07	0.00426482	3.40959e-07	0.00397085	1.11988e-07	0.00130423
11080	26	2.38033e-07	0.00265898	8.00193e-08	0.000893865	2.24035e-06	0.0214935	7.29993e-07	0.00700343	1.86507e-06	0.0146261	6.08683e-07	0.00477338	2.42554e-06	0.0241017	7.89846e-07	0.00784843	1.4517e-06	0.013032	4.75609e-07	0.00426958	3.42705e-07	0.00397427	1.12562e-07	0.00130535
11090	26	2.39786e-07	0.00266137	8.06086e-08	0.000894668	2.24768e-06	0.021516	7.32383e-07	0.00701075	1.86821e-06	0.0146448	6.0971e-07	0.00477947	2.4257e-06	0.024126	7.89898e-07	0.00785632	1.45187e-06	0.0130465	4.75664e-07	0.00427433	3.48173e-07	0.00397773	1.14358e-07	0.00130649
11100	26	2.3805e-07	0.00266375	8.00248e-08	0.000895468	2.25377e-06	0.0215385	7.34367e-07	0.00701808	1.87033e-06	0.0146635	6.10401e-07	0.00478557	2.42346e-06	0.0241502	7.8917e-07	0.00786422	1.45289e-06	0.0130611	4.75999e-07	0.00427909	3.54854e-07	0.00398125	1.16552e-07	0.00130764
11110	26	2.3146e-07	0.0026661	7.78096e-08	0.000896257	2.24754e-06	0.021561	7.32336e-07	0.00702541	1.87075e-06	0.0146822	6.1054e-07	0.00479167	2.42474e-06	0.0241745	7.89585e-07	0.00787211	1.45239e-06	0.0130756	4.75836e-07	0.00428385	3.60039e-07	0.00398482	1.18255e-07	0.00130882
11120	26	2.24601e-07	0.00266837	7.55039e-08	0.000897023	2.24327e-06	0.0215834	7.30944e-07	0.00703273	1.86504e-06	0.0147008	6.08675e-07	0.00479777	2.42305e-06	0.0241987	7.89036e-07	0.00788	1.45647e-06	0.0130902	4.77171e-07	0.00428862	3.59424e-07	0.0039884	1.18053e-07	0.00130999
11130	26	2.18448e-07	0.0026706	7.34354e-08	0.000897771	2.23969e-06	0.0216059	7.29778e-07	0.00704003	1.86136e-06	0.0147195	6.07475e-07	0.00480385	2.42365e-06	0.0242229	7.89232e-07	0.0078879	1.4631e-06	0.0131047	4.79342e-07	0.0042934	3.55653e-07	0.00399199	1.16814e-07	0.00131117
11140	26	2.16279e-07	0.00267277	7.27061e-08	0.000898501	2.23326e-06	0.0216282	7.27684e-07	0.00704732	1.86425e-06	0.0147381	6.08416e-07	0.00480993	2.42342e-06	0.0242472	7.89157e-07	0.00789579	1.46707e-06	0.0131194	4.80645e-07	0.0042982	3.54628e-07	0.00399554	1.16478e-07	0.00131234
11150	26	2.13507e-07	0.00267492	7.17742e-08	0.000899223	2.23366e-06	0.0216506	7.27815e-07	0.0070546	1.86822e-06	0.0147568	6.09713e-07	0.00481602	2.42459e-06	0.0242714	7.89539e-07	0.00790368	1.46937e-06	0.0131341	4.81398e-07	0.00430301	3.53583e-07	0.00399908	1.16135e-07	0.0013135
11160	26	2.0682e-07	0.00267702	6.95263e-08	0.000899928	2.23961e-06	0.0216729	7.29751e-07	0.00706189	1.8633e-06	0.0147754	6.08107e-07	0.00482211	2.43714e-06	0.0242957	7.93625e-07	0.0079116	1.46789e-06	0.0131488	4.80912e-07	0.00430782	3.51055e-07	0.0040026	1.15304e-07	0.00131466
11170	26	2.07388e-07	0.0026791	6.97172e-08	0.00090063	2.24865e-06	0.0216954	7.32698e-07	0.00706919	1.86175e-06	0.0147941	6.07601e-07	0.00482819	2.43966e-06	0.0243201	7.94443e-07	0.00791953	1.46535e-06	0.0131634	4.80082e-07	0.00431262	3.46402e-07	0.00400608	1.13776e-07	0.0013158
11180	26	2.15215e-07	0.00268121	7.23484e-08	0.000901338	2.25224e-06	0.0217179	7.33867e-07	0.00707653	1.86434e-06	0.0148127	6.08447e-07	0.00483427	2.43352e-06	0.0243445	7.92446e-07	0.00792747	1.46263e-06	0.0131781	4.7919e-07	0.00431742	3.4202e-07	0.00400954	1.12337e-07	0.00131693
11190	26	2.31849e-07	0.00268343	7.79402e-08	0.000902084	2.25436e-06	0.0217404	7.34559e-07	0.00708387	1.87352e-06	0.0148314	6.11443e-07	0.00484036	2.42948e-06	0.0243688	7.91128e-07	0.00793539	1.46193e-06	0.0131927	4.78961e-07	0.00432221	3.44848e-07	0.00401297	1.13265e-07	0.00131806
11200	26	2.34918e-07	0.00268577	7.89721e-08	0.000902871	2.25489e-06	0.0217629	7.34732e-07	0.00709122	1.8793e-06	0.0148501	6.13329e-07	0.00484649	2.43227e-06	0.0243931	7.92038e-07	0.00794331	1.46845e-06	0.0132074	4.81095e-07	0.00432702	3.44002e-07	0.00401641	1.12988e-07	0.00131919
11210	26	2.35738e-07	0.00268812	7.92476e-08	0.00090366	2.25429e-06	0.0217855	7.34535e-07	0.00709856	1.88391e-06	0.014869	6.14832e-07	0.00485263	2.43892e-06	0.0244175	7.94203e-07	0.00795124	1.47169e-06	0.013222	4.82158e-07	0.00433183	3.44307e-07	0.00401985	1.13088e-07	0.00132032
11220	26	2.33758e-07	0.00269047	7.8582e-08	0.00090445	2.24289e-06	0.021808	7.3082e-07	0.00710589	1.88688e-06	0.0148878	6.15801e-07	0.00485878	2.43828e-06	0.0244418	7.93996e-07	0.00795918	1.47058e-06	0.0132368	4.81794e-07	0.00433665	3.46031e-07	0.0040233	1.13654e-07	0.00132146
11230	26	2.30128e-07	0.00269278	7.73616e-08	0.000905227	2.24192e-06	0.0218304	7.30504e-07	0.0071132	1.88398e-06	0.0149066	6.14857e-07	0.00486493	2.43046e-06	0.0244662	7.9145e-07	0.0079671	1.45897e-06	0.0132514	4.7799e-07	0.00434144	3.48182e-07	0.00402678	1.14361e-07	0.0013226
11240	26	2.23987e-07	0.00269504	7.52975e-08	0.000905987	2.24204e-06	0.0218528	7.30545e-07	0.0071205	1.88161e-06	0.0149255	6.14081e-07	0.00487108	2.42304e-06	0.0244905	7.89032e-07	0.00797501	1.44959e-06	0.0132659	4.74917e-07	0.00434621	3.48853e-07	0.00403026	1.14581e-07	0.00132374
11250	26	2.13529e-07	0.00269722	7.17816e-08	0.000906721	2.24048e-06	0.0218752	7.30035e-07	0.0071278	1.88215e-06	0.0149443	6.14259e-07	0.00487722	2.42187e-06	0.0245147	7.88651e-07	0.0079829	1.44799e-06	0.0132804	4.74394e-07	0.00435096	3.46514e-07	0.00403373	1.13813e-07	0.00132488
11260	26	2.11578e-07	0.00269937	7.11259e-08	0.000907444	2.23693e-06	0.0218976	7.28878e-07	0.0071351	1.88273e-06	0.0149631	6.14449e-07	0.00488337	2.42157e-06	0.0245389	7.88555e-07	0.00799078	1.4477e-06	0.0132949	4.74299e-07	0.0043557	3.47799e-07	0.00403721	1.14235e-07	0.00132602
11270	26	2.14414e-07	0.0027015	7.20791e-08	0.000908158	2.23155e-06	0.02192	7.27126e-07	0.00714238	1.88275e-06	0.014982	6.14453e-07	0.00488951	2.41913e-06	0.0245631	7.8776e-07	0.00799866	1.44621e-06	0.0133094	4.73809e-07	0.00436044	3.52103e-07	0.00404071	1.15648e-07	0.00132717
11280	26	2.10507e-07	0.00270362	7.07658e-08	0.000908873	2.22773e-06	0.0219423	7.25882e-07	0.00714964	1.88162e-06	0.0150008	6.14085e-07	0.00489565	2.41715e-06	0.0245873	7.87114e-07	0.00800654	1.44316e-06	0.0133238	4.7281e-07	0.00436517	3.54624e-07	0.00404424	1.16477e-07	0.00132833
11290	26	2.05624e-07	0.0027057	6.91243e-08	0.000909572	2.23459e-06	0.0219646	7.28117e-07	0.00715691	1.87465e-06	0.0150196	6.11811e-07	0.00490178	2.40696e-06	0.0246114	7.83797e-07	0.00801439	1.44779e-06	0.0133383	4.74326e-07	0.00436991	3.55823e-07	0.0040478	1.1687e-07	0.0013295
11300	26	2.0819e-07	0.00270778	6.99869e-08	0.00091027	2.23613e-06	0.0219869	7.28619e-07	0.0071642	1.86993e-06	0.0150383	6.1027e-07	0.00490789	2.40445e-06	0.0246355	7.8298e-07	0.00802223	1.45114e-06	0.0133528	4.75424e-07	0.00437466	3.51421e-07	0.00405133	1.15424e-07	0.00133066
11310	26	2.12464e-07	0.00270988	7.14238e-08	0.000910977	2.23314e-06	0.0220093	7.27644e-07	0.00717148	1.86991e-06	0.015057	6.10265e-07	0.004914	2.40625e-06	0.0246595	7.83565e-07	0.00803006	1.45484e-06	0.0133673	4.76636e-07	0.00437942	3.46716e-07	0.00405482	1.13879e-07	0.00133181
11320	26	2.14708e-07	0.00271202	7.21781e-08	0.000911694	2.22959e-06	0.0220316	7.26488e-07	0.00717875	1.87225e-06	0.0150757	6.11028e-07	0.0049201	2.407e-06	0.0246836	7.83809e-07	0.0080379	1.461e-06	0.0133819	4.78656e-07	0.0043842	3.4602e-07	0.00405829	1.1365e-07	0.00133295
11330	26	2.14906e-07	0.00271416	7.22445e-08	0.000912416	2.22957e-06	0.0220539	7.26481e-07	0.00718601	1.87057e-06	0.0150944	6.10478e-07	0.00492621	2.40199e-06	0.0247076	7.82179e-07	0.00804573	1.47097e-06	0.0133966	4.81922e-07	0.004389	3.54115e-07	0.00406179	1.16309e-07	0.0013341
11340	26	2.11876e-07	0.00271629	7.12258e-08	0.00091313	2.23183e-06	0.0220762	7.27216e-07	0.00719328	1.867e-06	0.0151131	6.09315e-07	0.00493231	2.4068e-06	0.0247317	7.83743e-07	0.00805357	1.47074e-06	0.0134112	4.81846e-07	0.00439381	3.57096e-07	0.00406534	1.17288e-07	0.00133526
11350	26	2.06817e-07	0.00271839	6.95252e-08	0.000913837	2.23519e-06	0.0220985	7.28312e-07	0.00720056	1.8627e-06	0.0151317	6.0791e-07	0.0049384	2.41961e-06	0.0247558	7.87916e-07	0.00806141	1.46251e-06	0.0134259	4.79152e-07	0.00439862	3.55013e-07	0.0040689	1.16604e-07	0.00133643
11360	26	2.03575e-07	0.00272044	6.84356e-08	0.000914525	2.23181e-06	0.0221208	7.2721e-07	0.00720783	1.85844e-06	0.0151503	6.06519e-07	0.00494446	2.41466e-06	0.0247799	7.86303e-07	0.00806927	1.4583e-06	0.0134405	4.7777e-07	0.00440341	3.47549e-07	0.00407239	1.14153e-07	0.00133758
11370	26	2.01744e-07	0.00272247	6.78201e-08	0.000915209	2.22764e-06	0.0221431	7.25853e-07	0.0072151	1.85441e-06	0.0151689	6.05206e-07	0.00495053	2.40704e-06	0.0248041	7.83822e-07	0.00807713	1.45334e-06	0.0134551	4.76145e-07	0.00440818	3.40298e-07	0.00407585	1.11771e-07	0.00133871
11380	26	2.05579e-07	0.00272451	6.91093e-08	0.000915894	2.22496e-06	0.0221654	7.24977e-07	0.00722235	1.85154e-06	0.0151874	6.04269e-07	0.00495657	2.4002e-06	0.0248281	7.81596e-07	0.00808496	1.44143e-06	0.0134695	4.72244e-07	0.00441292	3.3843e-07	0.00407924	1.11158e-07	0.00133983
11390	26	1.99813e-07	0.00272652	6.7171e-08	0.000916568	2.22562e-06	0.0221877	7.25193e-07	0.00722961	1.85887e-06	0.015206	6.06662e-07	0.00496264	2.40203e-06	0.0248521	7.8219e-07	0.00809278	1.43738e-06	0.013484	4.70918e-07	0.00441764	3.45345e-07	0.00408268	1.13429e-07	0.00134096
11400	26	1.90127e-07	0.00272849	6.39147e-08	0.000917233	2.22709e-06	0.0222099	7.25673e-07	0.00723686	1.87092e-06	0.0152246	6.10595e-07	0.00496871	2.40778e-06	0.0248762	7.84065e-07	0.00810061	1.43805e-06	0.0134983	4.71136e-07	0.00442235	3.56154e-07	0.00408616	1.16979e-07	0.0013421
11410	26	1.9825e-07	0.00273045	6.66455e-08	0.00091789	2.21979e-06	0.0222321	7.23293e-07	0.0072441	1.87317e-06	0.0152434	6.11329e-07	0.00497482	2.40453e-06	0.0249002	7.83005e-07	0.00810844	1.43535e-06	0.0135127	4.70252e-07	0.00442705	3.59877e-07	0.00408975	1.18202e-07	0.00134328
11420	26	2.06984e-07	0.00273249	6.95816e-08	0.000918576	2.21547e-06	0.0222543	7.21887e-07	0.00725133	1.87477e-06	0.0152621	6.1185e-07	0.00498094	2.39622e-06	0.0249242	7.80299e-07	0.00811625	1.43781e-06	0.0135271	4.71059e-07	0.00443176	3.61837e-07	0.00409335	1.18846e-07	0.00134446
11430	26	2.16048e-07	0.00273458	7.26284e-08	0.000919278	2.21277e-06	0.0222765	7.21008e-07	0.00725854	1.87601e-06	0.0152808	6.12256e-07	0.00498706	2.38518e-06	0.0249481	7.76703e-07	0.00812405	1.44306e-06	0.0135415	4.72778e-07	0.00443648	3.62844e-07	0.00409697	1.19176e-07	0.00134565
11440	26	2.15024e-07	0.00273672	7.22843e-08	0.00092	2.21716e-06	0.0222986	7.22436e-07	0.00726577	1.87565e-06	0.0152996	6.12138e-07	0.00499318	2.38546e-06	0.024972	7.76794e-07	0.00813182	1.43915e-06	0.0135559	4.71497e-07	0.00444119	3.56666e-07	0.00410055	1.17147e-07	0.00134683
11450	26	2.1055e-07	0.00273885	7.07803e-08	0.000920716	2.22078e-06	0.0223208	7.23616e-07	0.00727299	1.87515e-06	0.0153184	6.11973e-07	0.0049993	2.38492e-06	0.0249958	7.7662e-07	0.00813958	1.43371e-06	0.0135702	4.69713e-07	0.0044459	3.51558e-07	0.00410411	1.15469e-07	0.001348
11460	26	1.98117e-07	0.0027409	6.66008e-08	0.000921404	2.21977e-06	0.022343	7.23288e-07	0.00728023	1.87471e-06	0.0153371	6.11831e-07	0.00500542	2.38255e-06	0.0250197	7.75848e-07	0.00814735	1.42799e-06	0.0135845	4.6784e-07	0.00445059	3.5108e-07	0.00410762	1.15312e-07	0.00134915
11470	26	1.88227e-07	0.00274284	6.32759e-08	0.000922055	2.21606e-06	0.0223652	7.2208e-07	0.00728745	1.87613e-06	0.0153559	6.12295e-07	0.00501154	2.3969e-06	0.0250436	7.8052e-07	0.00815513	1.43406e-06	0.0135989	4.69829e-07	0.00445528	3.48453e-07	0.00411112	1.14449e-07	0.0013503
11480	26	1.94168e-07	0.00274476	6.52732e-08	0.000922702	2.22469e-06	0.0223874	7.24891e-07	0.00729469	1.87745e-06	0.0153746	6.12723e-07	0.00501767	2.39628e-06	0.0250675	7.80317e-07	0.00816293	1.44187e-06	0.0136132	4.72387e-07	0.00446	3.46539e-07	0.00411459	1.13821e-07	0.00135144
11490	26	1.87895e-07	0.00274665	6.31642e-08	0.000923338	2.22794e-06	0.0224097	7.25951e-07	0.00730195	1.87718e-06	0.0153934	6.12636e-07	0.00502379	2.39417e-06	0.0250915	7.79632e-07	0.00817073	1.44574e-06	0.0136277	4.73654e-07	0.00446472	3.52836e-07	0.0041181	1.15889e-07	0.00135259
11500	26	1.74449e-07	0.00274847	5.86441e-08	0.000923947	2.22448e-06	0.0224319	7.24821e-07	0.0073092	1.88294e-06	0.0154122	6.14516e-07	0.00502993	2.39248e-06	0.0251154	7.79082e-07	0.00817852	1.44533e-06	0.0136421	4.73521e-07	0.00446946	3.61928e-07	0.00412167	1.18875e-07	0.00135376
11510	26	1.68558e-07	0.00275018	5.66639e-08	0.000924523	2.21936e-06	0.0224541	7.23155e-07	0.00731644	1.87854e-06	0.015431	6.13081e-07	0.00503606	2.39242e-06	0.0251393	7.79061e-07	0.00818631	1.44292e-06	0.0136566	4.72733e-07	0.00447419	3.63059e-07	0.00412529	1.19247e-07	0.00135495
11520	26	1.67479e-07	0.00275188	5.6301e-08	0.000925093	2.22663e-06	0.0224764	7.25524e-07	0.00732368	1.87544e-06	0.0154498	6.12068e-07	0.00504219	2.39287e-06	0.0251633	7.79209e-07	0.0081941	1.44063e-06	0.013671	4.71981e-07	0.00447891	3.58165e-07	0.00412889	1.17639e-07	0.00135613
11530	26	1.72431e-07	0.00275357	5.79657e-08	0.000925663	2.24126e-06	0.0224987	7.3029e-07	0.00733096	1.87737e-06	0.0154685	6.12698e-07	0.00504832	2.39379e-06	0.0251872	7.79509e-07	0.0082019	1.43885e-06	0.0136854	4.714e-07	0.00448363	3.4607e-07	0.00413242	1.13667e-07	0.0013573
11540	26	1.83238e-07	0.00275537	6.15987e-08	0.000926269	2.24466e-06	0.0225211	7.31398e-07	0.00733827	1.8814e-06	0.0154873	6.14015e-07	0.00505445	2.39313e-06	0.0252111	7.79291e-07	0.00820969	1.44026e-06	0.0136998	4.71859e-07	0.00448835	3.40999e-07	0.00413585	1.12001e-07	0.00135842
11550	26	1.86295e-07	0.00275719	6.26265e-08	0.000926879	2.24569e-06	0.0225436	7.31735e-07	0.00734558	1.87748e-06	0.0155061	6.12735e-07	0.00506058	2.3908e-06	0.0252351	7.78535e-07	0.00821748	1.43649e-06	0.0137142	4.70626e-07	0.00449306	3.36557e-07	0.00413924	1.10542e-07	0.00135954
11560	26	1.71701e-07	0.00275899	5.77206e-08	0.000927484	2.24537e-06	0.0225661	7.3163e-07	0.0073529	1.87052e-06	0.0155249	6.10462e-07	0.0050667	2.38561e-06	0.0252589	7.76843e-07	0.00822526	1.42141e-06	0.0137285	4.65685e-07	0.00449774	3.31436e-07	0.00414259	1.0886e-07	0.00136063
11570	26	1.63556e-07	0.00276066	5.49823e-08	0.000928048	2.23872e-06	0.0225885	7.29462e-07	0.0073602	1.86465e-06	0.0155435	6.08548e-07	0.00507279	2.38139e-06	0.0252828	7.75471e-07	0.00823302	1.41969e-06	0.0137427	4.65123e-07	0.0045024	3.37461e-07	0.00414594	1.10839e-07	0.00136174
11580	26	1.60718e-07	0.00276229	5.40284e-08	0.000928593	2.23117e-06	0.0226108	7.27001e-07	0.00736748	1.8594e-06	0.0155622	6.06834e-07	0.00507887	2.38334e-06	0.0253066	7.76104e-07	0.00824078	1.41435e-06	0.0137568	4.63372e-07	0.00450704	3.44548e-07	0.00414936	1.13167e-07	0.00136286
11590	26	1.62033e-07	0.0027639	5.44705e-08	0.000929136	2.22806e-06	0.0226331	7.2599e-07	0.00737475	1.85577e-06	0.0155807	6.05649e-07	0.00508493	2.38724e-06	0.0253305	7.77375e-07	0.00824854	1.40972e-06	0.013771	4.61856e-07	0.00451167	3.49452e-07	0.00415282	1.14778e-07	0.00136399
11600	26	1.69358e-07	0.00276556	5.69329e-08	0.000929694	2.2334e-06	0.0226554	7.27727e-07	0.00738202	1.85609e-06	0.0155993	6.05754e-07	0.00509099	2.3875e-06	0.0253543	7.77459e-07	0.00825632	1.41651e-06	0.0137851	4.64078e-07	0.0045163	3.48876e-07	0.00415631	1.14588e-07	0.00136514
11610	26	1.80135e-07	0.0027673	6.05558e-08	0.000930278	2.23208e-06	0.0226778	7.27297e-07	0.0073893	1.85504e-06	0.0156179	6.05411e-07	0.00509704	2.38436e-06	0.0253782	7.76437e-07	0.00826409	1.4303e-06	0.0137993	4.68597e-07	0.00452096	3.43292e-07	0.00415977	1.12755e-07	0.00136628
11620	26	1.82975e-07	0.00276912	6.15105e-08	0.00093089	2.22708e-06	0.0227	7.25669e-07	0.00739656	1.86003e-06	0.0156364	6.07039e-07	0.00510311	2.38062e-06	0.025402	7.75218e-07	0.00827184	1.43619e-06	0.0138137	4.70526e-07	0.00452565	3.38528e-07	0.00416318	1.1119e-07	0.0013674
11630	26	1.87434e-07	0.00277098	6.30093e-08	0.000931514	2.22587e-06	0.0227223	7.25275e-07	0.00740381	1.8661e-06	0.0156551	6.09021e-07	0.00510919	2.38137e-06	0.0254258	7.75464e-07	0.0082796	1.43678e-06	0.013828	4.70721e-07	0.00453036	3.37102e-07	0.00416656	1.10721e-07	0.00136851
11640	26	1.91637e-07	0.00277287	6.44223e-08	0.00093215	2.22528e-06	0.0227446	7.25082e-07	0.00741107	1.86216e-06	0.0156737	6.07735e-07	0.00511527	2.38196e-06	0.0254496	7.75654e-07	0.00828735	1.43356e-06	0.0138424	4.69667e-07	0.00453506	3.36569e-07	0.00416992	1.10546e-07	0.00136961
11650	26	1.93751e-07	0.00277479	6.5133e-08	0.000932798	2.22233e-06	0.0227668	7.2412e-07	0.00741831	1.85327e-06	0.0156922	6.04835e-07	0.00512132	2.37768e-06	0.0254734	7.74262e-07	0.0082951	1.42707e-06	0.0138567	4.67538e-07	0.00453974	3.34654e-07	0.00417328	1.09917e-07	0.00137071
11660	26	1.99085e-07	0.00277676	6.69262e-08	0.000933458	2.22134e-06	0.022789	7.23798e-07	0.00742555	1.84266e-06	0.0157108	6.01369e-07	0.00512736	2.37434e-06	0.0254972	7.73175e-07	0.00830284	1.41888e-06	0.0138709	4.64857e-07	0.00454441	3.31738e-07	0.00417661	1.08959e-07	0.00137181
11670	26	2.01133e-07	0.00277876	6.76146e-08	0.00093413	2.22242e-06	0.0228112	7.24152e-07	0.00743279	1.83743e-06	0.0157291	5.99664e-07	0.00513337	2.37345e-06	0.0255209	7.72883e-07	0.00831057	1.41482e-06	0.0138851	4.63526e-07	0.00454905	3.30893e-07	0.00417993	1.08682e-07	0.0013729
11680	26	1.98922e-07	0.00278076	6.68713e-08	0.000934804	2.2195e-06	0.0228334	7.232e-07	0.00744003	1.83757e-06	0.0157475	5.9971e-07	0.00513937	2.37439e-06	0.0255447	7.73189e-07	0.0083183	1.41925e-06	0.0138992	4.64979e-07	0.0045537	3.36052e-07	0.00418327	1.10376e-07	0.001374
11690	26	2.0704e-07	0.00278278	6.96005e-08	0.000935483	2.20979e-06	0.0228556	7.20036e-07	0.00744725	1.8451e-06	0.0157659	6.02167e-07	0.00514537	2.37456e-06	0.0255684	7.73245e-07	0.00832603	1.4229e-06	0.0139135	4.66173e-07	0.00455835	3.43235e-07	0.00418665	1.12736e-07	0.00137511
11700	26	2.12294e-07	0.00278489	7.13665e-08	0.000936191	2.20838e-06	0.0228777	7.19577e-07	0.00745444	1.83788e-06	0.0157843	5.9981e-07	0.00515138	2.37795e-06	0.0255922	7.7435e-07	0.00833377	1.42138e-06	0.0139277	4.65675e-07	0.00456301	3.45959e-07	0.0041901	1.1363e-07	0.00137624
11710	26	2.14153e-07	0.00278701	7.19916e-08	0.000936905	2.21069e-06	0.0228998	7.2033e-07	0.00746165	1.83837e-06	0.0158027	5.99971e-07	0.00515739	2.38575e-06	0.025616	7.76891e-07	0.00834153	1.42364e-06	0.0139419	4.66414e-07	0.00456767	3.51546e-07	0.0041936	1.15465e-07	0.00137739
11720	26	2.1267e-07	0.00278915	7.14928e-08	0.000937622	2.2158e-06	0.0229219	7.21994e-07	0.00746886	1.84886e-06	0.0158212	6.03395e-07	0.0051634	2.39173e-06	0.0256399	7.78838e-07	0.00834931	1.43025e-06	0.0139562	4.68582e-07	0.00457235	3.60873e-07	0.00419716	1.18529e-07	0.00137856
11730	26	2.15804e-07	0.0027913	7.25466e-08	0.000938346	2.20955e-06	0.022944	7.19959e-07	0.00747606	1.85294e-06	0.0158397	6.04724e-07	0.00516944	2.39312e-06	0.0256638	7.79291e-07	0.0083571	1.4278e-06	0.0139704	4.6778e-07	0.00457702	3.70343e-07	0.00420082	1.21639e-07	0.00137976
11740	26	2.18719e-07	0.00279346	7.35263e-08	0.000939072	2.19818e-06	0.0229661	7.16254e-07	0.00748325	1.85427e-06	0.0158582	6.0516e-07	0.00517549	2.39411e-06	0.0256878	7.7961e-07	0.00836489	1.41839e-06	0.0139847	4.64694e-07	0.00458169	3.75232e-07	0.00420453	1.23245e-07	0.00138098
11750	26	2.14254e-07	0.00279562	7.20253e-08	0.0009398	2.18873e-06	0.022988	7.13174e-07	0.00749039	1.85736e-06	0.0158768	6.06167e-07	0.00518154	2.39769e-06	0.0257117	7.80778e-07	0.00837269	1.40238e-06	0.0139988	4.59451e-07	0.00458631	3.66999e-07	0.00420824	1.20541e-07	0.0013822
11760	26	2.13494e-07	0.00279777	7.17699e-08	0.00094052	2.18484e-06	0.0230099	7.11906e-07	0.00749752	1.86569e-06	0.0158954	6.08888e-07	0.00518762	2.39443e-06	0.0257357	7.79716e-07	0.00838049	1.39905e-06	0.0140128	4.5836e-07	0.0045909	3.58751e-07	0.00421186	1.17832e-07	0.00138339
11770	26	2.12185e-07	0.00279989	7.133e-08	0.000941234	2.18515e-06	0.0230317	7.12008e-07	0.00750464	1.871e-06	0.0159141	6.10621e-07	0.00519372	2.39154e-06	0.0257596	7.78774e-07	0.00838829	1.39818e-06	0.0140268	4.58075e-07	0.00459548	3.48079e-07	0.00421539	1.14327e-07	0.00138455
11780	26	2.03227e-07	0.00280195	6.83187e-08	0.000941929	2.18952e-06	0.0230536	7.1343e-07	0.00751177	1.86913e-06	0.0159328	6.1001e-07	0.00519982	2.39052e-06	0.0257835	7.78443e-07	0.00839608	1.39541e-06	0.0140408	4.57167e-07	0.00460006	3.33542e-07	0.00421882	1.09552e-07	0.00138567
11790	26	1.95519e-07	0.00280397	6.57273e-08	0.000942604	2.18748e-06	0.0230755	7.12766e-07	0.00751889	1.8564e-06	0.0159514	6.05855e-07	0.00520589	2.38877e-06	0.0258074	7.77873e-07	0.00840386	1.39074e-06	0.0140547	4.55637e-07	0.00460462	3.27617e-07	0.00422212	1.07606e-07	0.00138676
11800	26	1.93225e-07	0.00280591	6.49562e-08	0.000943258	2.18338e-06	0.0230973	7.11429e-07	0.00752602	1.84506e-06	0.0159699	6.02153e-07	0.00521194	2.3852e-06	0.0258313	7.76712e-07	0.00841163	1.3885e-06	0.0140686	4.54902e-07	0.00460918	3.24478e-07	0.00422539	1.06575e-07	0.00138783
11810	26	1.89299e-07	0.00280781	6.36364e-08	0.000943898	2.17532e-06	0.0231191	7.08806e-07	0.00753312	1.84068e-06	0.0159883	6.00723e-07	0.00521795	2.38127e-06	0.0258551	7.75432e-07	0.00841939	1.39263e-06	0.0140825	4.56256e-07	0.00461373	3.27425e-07	0.00422865	1.07543e-07	0.0013889
11820	26	1.84768e-07	0.00280969	6.2113e-08	0.000944529	2.17215e-06	0.0231409	7.07772e-07	0.0075402	1.84062e-06	0.0160067	6.00704e-07	0.00522396	2.37702e-06	0.0258789	7.74046e-07	0.00842713	1.38953e-06	0.0140964	4.55239e-07	0.00461829	3.28928e-07	0.00423193	1.08036e-07	0.00138998
11830	26	1.8026e-07	0.00281151	6.05978e-08	0.000945141	2.16927e-06	0.0231626	7.06833e-07	0.00754727	1.83978e-06	0.0160251	6.0043e-07	0.00522997	2.37163e-06	0.0259026	7.72291e-07	0.00843487	1.38477e-06	0.0141103	4.53682e-07	0.00462283	3.28176e-07	0.00423521	1.07789e-07	0.00139106
11840	26	1.75328e-07	0.00281329	5.89399e-08	0.00094574	2.16622e-06	0.0231843	7.05839e-07	0.00755434	1.83993e-06	0.0160435	6.0048e-07	0.00523597	2.36377e-06	0.0259263	7.69732e-07	0.00844258	1.38058e-06	0.0141241	4.52308e-07	0.00462736	3.26542e-07	0.00423849	1.07253e-07	0.00139213
11850	26	1.70937e-07	0.00281503	5.74635e-08	0.000946323	2.16357e-06	0.0232059	7.04977e-07	0.00756139	1.84041e-06	0.0160619	6.00635e-07	0.00524198	2.35407e-06	0.0259499	7.66572e-07	0.00845026	1.38268e-06	0.0141379	4.52995e-07	0.00463189	3.26796e-07	0.00424176	1.07336e-07	0.00139321
11860	26	1.70062e-07	0.00281673	5.71696e-08	0.000946897	2.16287e-06	0.0232275	7.04748e-07	0.00756844	1.84024e-06	0.0160803	6.0058e-07	0.00524798	2.35013e-06	0.0259734	7.65289e-07	0.00845792	1.39426e-06	0.0141518	4.56791e-07	0.00463643	3.25167e-07	0.00424502	1.06801e-07	0.00139428
11870	26	1.67844e-07	0.00281842	5.64239e-08	0.000947465	2.16425e-06	0.0232492	7.05197e-07	0.00757549	1.83958e-06	0.0160987	6.00367e-07	0.00525399	2.34604e-06	0.0259969	7.63958e-07	0.00846556	1.39231e-06	0.0141657	4.5615e-07	0.004641	3.33257e-07	0.00424833	1.09458e-07	0.00139537
11880	26	1.65779e-07	0.00282009	5.57297e-08	0.000948025	2.16775e-06	0.0232708	7.06338e-07	0.00758255	1.83071e-06	0.0161171	5.9747e-07	0.00525998	2.34089e-06	0.0260203	7.62281e-07	0.0084732	1.39051e-06	0.0141796	4.55563e-07	0.00464556	3.41675e-07	0.0042517	1.12223e-07	0.00139647
11890	26	1.64504e-07	0.00282174	5.5301e-08	0.00094858	2.17678e-06	0.0232926	7.09279e-07	0.00758963	1.83486e-06	0.0161354	5.98824e-07	0.00526596	2.35937e-06	0.0260439	7.68301e-07	0.00848086	1.39025e-06	0.0141935	4.55475e-07	0.00465011	3.47169e-07	0.00425514	1.14028e-07	0.0013976
11900	26	1.60029e-07	0.00282336	5.37968e-08	0.000949123	2.17408e-06	0.0233143	7.084e-07	0.00759671	1.8402e-06	0.0161538	6.00569e-07	0.00527196	2.3697e-06	0.0260675	7.71663e-07	0.00848856	1.3928e-06	0.0142074	4.5631e-07	0.00465467	3.43963e-07	0.00425859	1.12975e-07	0.00139874
11910	26	1.58182e-07	0.00282496	5.31759e-08	0.000949661	2.16721e-06	0.023336	7.06162e-07	0.00760379	1.84828e-06	0.0161722	6.03205e-07	0.00527797	2.36808e-06	0.0260912	7.71134e-07	0.00849627	1.39987e-06	0.0142214	4.58629e-07	0.00465924	3.44637e-07	0.00426204	1.13196e-07	0.00139987
11920	26	1.62648e-07	0.00282656	5.4677e-08	0.000950202	2.16391e-06	0.0233577	7.05086e-07	0.00761085	1.85927e-06	0.0161908	6.06791e-07	0.00528403	2.35999e-06	0.0261148	7.68501e-07	0.00850397	1.4103e-06	0.0142355	4.62046e-07	0.00466385	3.4725e-07	0.0042655	1.14054e-07	0.001401
11930	26	1.70052e-07	0.00282823	5.7166e-08	0.000950761	2.16734e-06	0.0233793	7.06203e-07	0.0076179	1.86839e-06	0.0162094	6.09767e-07	0.00529011	2.36561e-06	0.0261385	7.70332e-07	0.00851167	1.41871e-06	0.0142496	4.64799e-07	0.00466848	3.51797e-07	0.004269	1.15548e-07	0.00140216
11940	26	1.72652e-07	0.00282994	5.80401e-08	0.000951336	2.17577e-06	0.0234011	7.0895e-07	0.00762498	1.87416e-06	0.0162281	6.1165e-07	0.00529622	2.37994e-06	0.0261622	7.74996e-07	0.0085194	1.41407e-06	0.0142638	4.63281e-07	0.00467312	3.47783e-07	0.00427247	1.1423e-07	0.00140329
11950	26	1.69741e-07	0.00283165	5.70614e-08	0.000951911	2.18599e-06	0.0234229	7.12281e-07	0.00763208	1.87474e-06	0.0162469	6.11839e-07	0.00530233	2.39674e-06	0.0261861	7.8047e-07	0.00852717	1.40546e-06	0.0142779	4.60458e-07	0.00467774	3.28531e-07	0.00427587	1.07906e-07	0.00140441
11960	26	1.75107e-07	0.00283339	5.88654e-08	0.000952495	2.19198e-06	0.0234448	7.14232e-07	0.00763922	1.87021e-06	0.0162656	6.10362e-07	0.00530844	2.40241e-06	0.0262101	7.82314e-07	0.00853498	1.40942e-06	0.0142919	4.61756e-07	0.00468235	3.28388e-07	0.00427918	1.07859e-07	0.0014055
11970	26	1.99367e-07	0.00283525	6.7021e-08	0.000953122	2.19542e-06	0.0234667	7.15355e-07	0.00764636	1.86794e-06	0.0162843	6.09622e-07	0.00531454	2.40259e-06	0.0262341	7.82374e-07	0.0085428	1.41456e-06	0.0143061	4.63441e-07	0.00468698	3.32191e-07	0.00428247	1.09108e-07	0.00140658
11980	26	2.06663e-07	0.00283728	6.94735e-08	0.000953804	2.19816e-06	0.0234887	7.16245e-07	0.00765352	1.86628e-06	0.016303	6.09079e-07	0.00532064	2.40112e-06	0.0262581	7.81896e-07	0.00855062	1.41616e-06	0.0143202	4.63965e-07	0.00469161	3.3178e-07	0.00428579	1.08973e-07	0.00140767
11990	26	2.0573e-07	0.00283934	6.91598e-08	0.000954496	2.20126e-06	0.0235107	7.17255e-07	0.00766069	1.86879e-06	0.0163216	6.09897e-07	0.00532673	2.39937e-06	0.0262821	7.81326e-07	0.00855844	1.40702e-06	0.0143343	4.60972e-07	0.00469624	3.39779e-07	0.00428916	1.116e-07	0.00140878
12000	26	2.00379e-07	0.00284136	6.73609e-08	0.000955175	2.20453e-06	0.0235327	7.18323e-07	0.00766787	1.86247e-06	0.0163403	6.07838e-07	0.00533281	2.39834e-06	0.0263061	7.80989e-07	0.00856625	1.40687e-06	0.0143484	4.60923e-07	0.00470085	3.43622e-07	0.00429256	1.12863e-07	0.00140989
12010	26	1.96096e-07	0.00284335	6.59213e-08	0.000955844	2.20817e-06	0.0235547	7.19507e-07	0.00767506	1.85899e-06	0.0163589	6.06699e-07	0.00533889	2.39876e-06	0.0263301	7.81127e-07	0.00857406	1.40726e-06	0.0143625	4.6105e-07	0.00470546	3.40025e-07	0.00429598	1.11681e-07	0.00141102
12020	26	1.95336e-07	0.00284531	6.56658e-08	0.000956502	2.20271e-06	0.0235768	7.17729e-07	0.00768223	1.86652e-06	0.0163775	6.09159e-07	0.00534497	2.39662e-06	0.0263541	7.80428e-07	0.00858187	1.40829e-06	0.0143765	4.61387e-07	0.00471007	3.31986e-07	0.00429933	1.09041e-07	0.00141212
12030	26	1.91864e-07	0.00284724	6.44985e-08	0.000957152	2.19245e-06	0.0235988	7.14384e-07	0.0076894	1.86708e-06	0.0163962	6.09342e-07	0.00535106	2.39347e-06	0.026378	7.79405e-07	0.00858967	1.40822e-06	0.0143906	4.61363e-07	0.00471468	3.27647e-07	0.00430264	1.07616e-07	0.0014132
12040	26	1.89577e-07	0.00284915	6.37298e-08	0.000957794	2.18683e-06	0.0236207	7.12556e-07	0.00769653	1.87009e-06	0.0164149	6.10323e-07	0.00535716	2.39301e-06	0.0264019	7.79255e-07	0.00859746	1.41434e-06	0.0144047	4.63369e-07	0.00471931	3.27454e-07	0.00430592	1.07553e-07	0.00141428
12050	26	1.90835e-07	0.00285105	6.41528e-08	0.000958434	2.18652e-06	0.0236425	7.12453e-07	0.00770366	1.87248e-06	0.0164336	6.11101e-07	0.00536327	2.38477e-06	0.0264258	7.76571e-07	0.00860524	1.42262e-06	0.0144189	4.66082e-07	0.00472395	3.26705e-07	0.00430919	1.07307e-07	0.00141536
12060	26	1.94985e-07	0.00285298	6.55477e-08	0.000959082	2.18428e-06	0.0236644	7.11725e-07	0.00771078	1.86767e-06	0.0164523	6.09532e-07	0.00536937	2.37423e-06	0.0264496	7.73138e-07	0.00861299	1.42321e-06	0.0144332	4.66276e-07	0.00472862	3.23815e-07	0.00431244	1.06357e-07	0.00141642
12070	26	1.99305e-07	0.00285495	6.70002e-08	0.000959744	2.17759e-06	0.0236862	7.09544e-07	0.00771789	1.87079e-06	0.016471	6.1055e-07	0.00537547	2.36615e-06	0.0264733	7.70508e-07	0.00862071	1.41717e-06	0.0144474	4.64295e-07	0.00473327	3.18728e-07	0.00431566	1.04686e-07	0.00141748
12080	26	2.04846e-07	0.00285698	6.88627e-08	0.000960426	2.17e-06	0.0237079	7.07072e-07	0.00772497	1.86866e-06	0.0164897	6.09855e-07	0.00538157	2.36013e-06	0.026497	7.68547e-07	0.0086284	1.41274e-06	0.0144615	4.62846e-07	0.0047379	3.1331e-07	0.00431882	1.02907e-07	0.00141852
12090	26	2.05241e-07	0.00285902	6.89955e-08	0.000961111	2.15962e-06	0.0237296	7.0369e-07	0.00773202	1.86335e-06	0.0165083	6.08123e-07	0.00538766	2.36599e-06	0.0265206	7.70454e-07	0.0086361	1.41141e-06	0.0144756	4.62409e-07	0.00474253	3.13152e-07	0.00432195	1.02855e-07	0.00141955
12100	26	1.98704e-07	0.00286105	6.67979e-08	0.000961793	2.15392e-06	0.0237511	7.01831e-07	0.00773905	1.8551e-06	0.0165269	6.0543e-07	0.00539373	2.36533e-06	0.0265442	7.7024e-07	0.0086438	1.41377e-06	0.0144898	4.63183e-07	0.00474716	3.12428e-07	0.00432507	1.02617e-07	0.00142057
12110	26	1.98675e-07	0.00286303	6.67883e-08	0.000962461	2.15404e-06	0.0237727	7.0187e-07	0.00774607	1.83769e-06	0.0165454	5.99749e-07	0.00539975	2.35521e-06	0.0265679	7.66944e-07	0.00865149	1.42176e-06	0.0145039	4.658e-07	0.0047518	3.0975e-07	0.00432819	1.01737e-07	0.0014216
12120	26	1.96697e-07	0.00286501	6.61233e-08	0.000963125	2.15708e-06	0.0237942	7.0286e-07	0.00775309	1.83428e-06	0.0165637	5.98636e-07	0.00540575	2.35064e-06	0.0265914	7.65457e-07	0.00865915	1.427e-06	0.0145182	4.67517e-07	0.00475647	3.02643e-07	0.00433124	9.94032e-08	0.0014226
12130	26	1.98376e-07	0.00286699	6.66876e-08	0.000963793	2.15849e-06	0.0238158	7.03319e-07	0.00776012	1.83612e-06	0.0165821	5.99236e-07	0.00541174	2.3506e-06	0.0266149	7.65443e-07	0.00866681	1.42493e-06	0.0145324	4.66839e-07	0.00476114	3.01847e-07	0.00433428	9.91419e-08	0.0014236
12140	26	2.03165e-07	0.00286899	6.82976e-08	0.000964464	2.15832e-06	0.0238374	7.03264e-07	0.00776716	1.83999e-06	0.0166005	6.005e-07	0.00541773	2.35321e-06	0.0266384	7.66293e-07	0.00867447	1.41777e-06	0.0145467	4.64492e-07	0.0047658	3.06383e-07	0.00433731	1.00631e-07	0.00142459
12150	26	2.05708e-07	0.00287104	6.91525e-08	0.000965152	2.14767e-06	0.0238589	6.99793e-07	0.00777416	1.83679e-06	0.0166189	5.99456e-07	0.00542373	2.34088e-06	0.0266619	7.62279e-07	0.0086821	1.42205e-06	0.0145609	4.65895e-07	0.00477046	3.03575e-07	0.00434035	9.97092e-08	0.00142559
12160	26	2.02041e-07	0.00287306	6.79198e-08	0.000965832	2.14246e-06	0.0238804	6.98098e-07	0.00778116	1.83241e-06	0.0166372	5.98026e-07	0.00542972	2.33065e-06	0.0266852	7.58946e-07	0.00868971	1.42583e-06	0.0145751	4.67134e-07	0.00477512	3.00433e-07	0.00434337	9.86773e-08	0.00142658
12170	26	1.88701e-07	0.00287503	6.34353e-08	0.000966495	2.14819e-06	0.0239018	6.99965e-07	0.00778815	1.82749e-06	0.0166555	5.96419e-07	0.00543569	2.32674e-06	0.0267085	7.57673e-07	0.0086973	1.42656e-06	0.0145894	4.67371e-07	0.00477979	2.98185e-07	0.00434637	9.79391e-08	0.00142757
12180	26	1.81496e-07	0.00287688	6.10132e-08	0.000967116	2.15756e-06	0.0239234	7.03017e-07	0.00779517	1.81886e-06	0.0166737	5.93604e-07	0.00544164	2.33863e-06	0.0267319	7.61544e-07	0.0087049	1.42329e-06	0.0146036	4.66301e-07	0.00478446	2.98933e-07	0.00434936	9.81846e-08	0.00142855
12190	26	1.81281e-07	0.0028787	6.0941e-08	0.000967729	2.16077e-06	0.023945	7.04064e-07	0.0078022	1.81758e-06	0.0166919	5.93184e-07	0.00544758	2.34789e-06	0.0267553	7.64561e-07	0.00871253	1.41976e-06	0.0146178	4.65144e-07	0.00478912	2.98532e-07	0.00435234	9.80529e-08	0.00142953
12200	26	1.83939e-07	0.00288052	6.18343e-08	0.000968341	2.15804e-06	0.0239665	7.03174e-07	0.00780924	1.82329e-06	0.0167101	5.95048e-07	0.00545352	2.35188e-06	0.0267788	7.65862e-07	0.00872018	1.41596e-06	0.014632	4.639e-07	0.00479376	2.96162e-07	0.00435531	9.72745e-08	0.0014305
12210	26	1.82315e-07	0.00288236	6.12886e-08	0.000968957	2.15178e-06	0.0239881	7.01134e-07	0.00781626	1.833e-06	0.0167284	5.98218e-07	0.00545948	2.35055e-06	0.0268023	7.65428e-07	0.00872783	1.41084e-06	0.0146461	4.62221e-07	0.0047984	2.91332e-07	0.00435826	9.56881e-08	0.00143147
12220	26	1.81454e-07	0.00288417	6.0999e-08	0.000969568	2.15299e-06	0.0240096	7.01529e-07	0.00782327	1.82409e-06	0.0167467	5.95311e-07	0.00546544	2.35791e-06	0.0268259	7.67823e-07	0.0087355	1.40183e-06	0.0146602	4.59269e-07	0.004803	2.9085e-07	0.00436117	9.55297e-08	0.00143243
12230	26	1.7299e-07	0.00288593	5.81537e-08	0.000970157	2.15732e-06	0.0240312	7.02938e-07	0.0078303	1.81745e-06	0.0167649	5.93143e-07	0.00547138	2.36394e-06	0.0268495	7.69788e-07	0.00874319	1.39652e-06	0.0146742	4.5753e-07	0.00480758	2.90104e-07	0.00436407	9.52848e-08	0.00143338
12240	26	1.67789e-07	0.00288764	5.64054e-08	0.000970734	2.15766e-06	0.0240528	7.03049e-07	0.00783733	1.80966e-06	0.016783	5.906e-07	0.0054773	2.36673e-06	0.0268731	7.70696e-07	0.00875089	1.39449e-06	0.0146881	4.56866e-07	0.00481216	2.88033e-07	0.00436696	9.46045e-08	0.00143433
12250	26	1.73661e-07	0.00288935	5.83794e-08	0.000971307	2.15002e-06	0.0240743	7.00561e-07	0.00784435	1.80017e-06	0.0168011	5.87503e-07	0.0054832	2.36214e-06	0.0268968	7.69201e-07	0.00875859	1.39659e-06	0.0147021	4.57553e-07	0.00481673	2.85842e-07	0.00436984	9.38848e-08	0.00143528
12260	26	1.77109e-07	0.00289111	5.95383e-08	0.000971899	2.14953e-06	0.0240958	7.00401e-07	0.00785135	1.79881e-06	0.0168191	5.8706e-07	0.00548907	2.35039e-06	0.0269203	7.65376e-07	0.00876626	1.39979e-06	0.0147161	4.586e-07	0.00482131	2.91814e-07	0.00437274	9.58466e-08	0.00143623
12270	26	1.80218e-07	0.00289289	6.05836e-08	0.000972498	2.15189e-06	0.0241173	7.01169e-07	0.00785836	1.79839e-06	0.016837	5.86924e-07	0.00549494	2.33827e-06	0.0269437	7.61427e-07	0.00877389	1.39598e-06	0.01473	4.57354e-07	0.00482588	2.95572e-07	0.00437567	9.70808e-08	0.00143719
12280	26	1.82872e-07	0.0028947	6.14759e-08	0.000973108	2.15808e-06	0.0241389	7.03188e-07	0.00786538	1.79924e-06	0.016855	5.872e-07	0.00550081	2.32563e-06	0.0269671	7.57314e-07	0.00878149	1.38276e-06	0.0147439	4.53021e-07	0.00483044	2.9635e-07	0.00437862	9.73362e-08	0.00143816
12290	26	1.81852e-07	0.00289652	6.1133e-08	0.000973719	2.15554e-06	0.0241604	7.02359e-07	0.00787241	1.79765e-06	0.016873	5.86682e-07	0.00550668	2.31701e-06	0.0269903	7.54505e-07	0.00878905	1.38634e-06	0.0147578	4.54195e-07	0.00483498	3.09652e-07	0.00438166	1.01705e-07	0.00143916
12300	26	1.82316e-07	0.00289835	6.1289e-08	0.000974333	2.14904e-06	0.0241819	7.00243e-07	0.00787942	1.79328e-06	0.016891	5.85255e-07	0.00551254	2.31487e-06	0.0270135	7.53807e-07	0.0087966	1.3913e-06	0.0147717	4.55821e-07	0.00483953	3.14133e-07	0.00438477	1.03177e-07	0.00144018
12310	26	1.8458e-07	0.00290018	6.20501e-08	0.000974949	2.14366e-06	0.0242034	6.98488e-07	0.00788642	1.78891e-06	0.0169089	5.8383e-07	0.00551839	2.3178e-06	0.0270366	7.54762e-07	0.00880414	1.39529e-06	0.0147856	4.57129e-07	0.00484409	3.07242e-07	0.00438788	1.00914e-07	0.0014412
12320	26	1.87075e-07	0.00290204	6.28886e-08	0.000975573	2.14318e-06	0.0242248	6.98332e-07	0.0078934	1.78831e-06	0.0169268	5.83633e-07	0.00552422	2.31733e-06	0.0270598	7.54609e-07	0.00881168	1.40657e-06	0.0147996	4.60824e-07	0.00484868	2.89598e-07	0.00439088	9.51185e-08	0.00144218
12330	26	1.74638e-07	0.00290385	5.87078e-08	0.000976181	2.14806e-06	0.0242463	6.99922e-07	0.00790039	1.78654e-06	0.0169446	5.83055e-07	0.00553006	2.31531e-06	0.027083	7.53951e-07	0.00881923	1.40693e-06	0.0148137	4.60941e-07	0.00485329	2.8292e-07	0.00439373	9.29252e-08	0.00144312
12340	26	1.71507e-07	0.00290557	5.76552e-08	0.000976761	2.14865e-06	0.0242678	7.00113e-07	0.00790739	1.79063e-06	0.0169625	5.8439e-07	0.0055359	2.31372e-06	0.0271061	7.53435e-07	0.00882676	1.40958e-06	0.0148278	4.61808e-07	0.00485791	2.79386e-07	0.00439655	9.17644e-08	0.00144405
12350	26	1.7312e-07	0.00290731	5.81976e-08	0.000977345	2.15238e-06	0.0242893	7.01328e-07	0.0079144	1.79309e-06	0.0169805	5.85192e-07	0.00554174	2.31911e-06	0.0271293	7.55189e-07	0.00883431	1.41331e-06	0.0148419	4.63031e-07	0.00486253	2.79567e-07	0.00439934	9.18238e-08	0.00144497
12360	26	1.77761e-07	0.00290905	5.97578e-08	0.000977932	2.15839e-06	0.0243108	7.03287e-07	0.00792142	1.79428e-06	0.0169984	5.85581e-07	0.0055476	2.32149e-06	0.0271525	7.55965e-07	0.00884186	1.40341e-06	0.014856	4.59788e-07	0.00486713	2.89641e-07	0.0044022	9.51328e-08	0.00144591
12370	26	1.73337e-07	0.00291079	5.82703e-08	0.000978517	2.15634e-06	0.0243324	7.0262e-07	0.00792845	1.80147e-06	0.0170164	5.87927e-07	0.00555347	2.32096e-06	0.0271757	7.55791e-07	0.00884942	1.39749e-06	0.01487	4.57849e-07	0.00487173	2.96359e-07	0.00440511	9.73391e-08	0.00144686
12380	26	1.69644e-07	0.00291252	5.7029e-08	0.000979096	2.15551e-06	0.024354	7.0235e-07	0.00793548	1.80847e-06	0.0170344	5.90212e-07	0.00555936	2.3215e-06	0.0271989	7.55967e-07	0.00885698	1.39994e-06	0.014884	4.5865e-07	0.00487631	2.94602e-07	0.00440807	9.67621e-08	0.00144783
12390	26	1.70944e-07	0.00291422	5.7466e-08	0.000979668	2.16001e-06	0.0243755	7.03817e-07	0.0079425	1.81268e-06	0.0170525	5.91587e-07	0.00556526	2.32166e-06	0.0272221	7.5602e-07	0.00886454	1.40864e-06	0.014898	4.61502e-07	0.00488092	2.94633e-07	0.00441102	9.67722e-08	0.0014488
12400	26	1.77751e-07	0.00291599	5.97542e-08	0.000980263	2.15984e-06	0.0243971	7.0376e-07	0.00794954	1.8157e-06	0.0170707	5.92572e-07	0.00557119	2.32122e-06	0.0272453	7.55875e-07	0.0088721	1.42079e-06	0.0149122	4.6548e-07	0.00488555	3.00295e-07	0.004414	9.86321e-08	0.00144978
12410	26	1.84591e-07	0.00291779	6.20537e-08	0.000980867	2.1601e-06	0.0244187	7.03845e-07	0.00795658	1.81856e-06	0.0170888	5.93505e-07	0.00557712	2.32378e-06	0.0272686	7.56711e-07	0.00887966	1.43079e-06	0.0149264	4.68756e-07	0.00489022	3.10877e-07	0.00441707	1.02108e-07	0.00145079
12420	26	1.90212e-07	0.00291966	6.39432e-08	0.000981498	2.16304e-06	0.0244404	7.04802e-07	0.00796362	1.8213e-06	0.017107	5.94401e-07	0.00558306	2.33002e-06	0.0272918	7.58742e-07	0.00888724	1.4278e-06	0.0149407	4.67777e-07	0.0048949	3.21787e-07	0.00442022	1.05691e-07	0.00145182
12430	26	1.99763e-07	0.00292163	6.71541e-08	0.000982159	2.16444e-06	0.024462	7.05258e-07	0.00797067	1.82837e-06	0.0171253	5.96708e-07	0.00558901	2.33446e-06	0.0273152	7.60188e-07	0.00889484	1.43139e-06	0.014955	4.68954e-07	0.00489959	3.28208e-07	0.00442348	1.078e-07	0.00145289
12440	26	2.12261e-07	0.00292367	7.13553e-08	0.000982845	2.1636e-06	0.0244836	7.04986e-07	0.00797772	1.83413e-06	0.0171436	5.98585e-07	0.00559499	2.3362e-06	0.0273385	7.60755e-07	0.00890244	1.43878e-06	0.0149694	4.71377e-07	0.00490429	3.29426e-07	0.00442674	1.082e-07	0.00145397
12450	26	2.15507e-07	0.0029258	7.24467e-08	0.000983562	2.16158e-06	0.0245053	7.04326e-07	0.00798477	1.83047e-06	0.0171619	5.97394e-07	0.00560097	2.33354e-06	0.0273618	7.59887e-07	0.00891004	1.44067e-06	0.0149838	4.71995e-07	0.004909	3.2426e-07	0.00443001	1.06503e-07	0.00145504
12460	26	2.19527e-07	0.00292798	7.3798e-08	0.000984293	2.16028e-06	0.0245269	7.03904e-07	0.00799181	1.82709e-06	0.0171802	5.9629e-07	0.00560694	2.33028e-06	0.0273852	7.58828e-07	0.00891764	1.44159e-06	0.0149982	4.72297e-07	0.00491373	3.21848e-07	0.00443325	1.05711e-07	0.0014561
12470	26	2.32844e-07	0.00293025	7.82748e-08	0.000985056	2.16551e-06	0.0245485	7.05606e-07	0.00799886	1.82983e-06	0.0171985	5.97183e-07	0.00561291	2.32825e-06	0.0274085	7.58165e-07	0.00892522	1.44101e-06	0.0150126	4.72105e-07	0.00491845	3.21155e-07	0.00443647	1.05484e-07	0.00145716
12480	26	2.40973e-07	0.00293261	8.10074e-08	0.000985852	2.16746e-06	0.0245702	7.06243e-07	0.00800592	1.83224e-06	0.0172168	5.9797e-07	0.00561888	2.32365e-06	0.0274317	7.56669e-07	0.00893279	1.43853e-06	0.015027	4.71293e-07	0.00492316	3.20103e-07	0.00443967	1.05138e-07	0.00145821
12490	26	2.45317e-07	0.00293504	8.24678e-08	0.000986668	2.16281e-06	0.0245918	7.04729e-07	0.00801298	1.83176e-06	0.0172351	5.97812e-07	0.00562486	2.33088e-06	0.027455	7.59021e-07	0.00894038	1.43379e-06	0.0150413	4.6974e-07	0.00492787	3.17117e-07	0.00444285	1.04157e-07	0.00145926
12500	26	2.53306e-07	0.00293754	8.51533e-08	0.000987508	2.16456e-06	0.0246135	7.05299e-07	0.00802002	1.83247e-06	0.0172535	5.98044e-07	0.00563084	2.34211e-06	0.0274784	7.6268e-07	0.00894798	1.43092e-06	0.0150557	4.68802e-07	0.00493256	3.10097e-07	0.004446	1.01852e-07	0.00146029
12510	26	2.62338e-07	0.00294012	8.81897e-08	0.000988375	2.17471e-06	0.0246352	7.08605e-07	0.0080271	1.82528e-06	0.0172717	5.957e-07	0.0056368	2.34524e-06	0.0275018	7.63697e-07	0.00895561	1.42914e-06	0.01507	4.68219e-07	0.00493725	3.10889e-07	0.00444911	1.02112e-07	0.00146131
12520	26	2.67352e-07	0.00294276	8.98753e-08	0.000989264	2.18436e-06	0.024657	7.1175e-07	0.0080342	1.82204e-06	0.01729	5.94643e-07	0.00564276	2.341e-06	0.0275252	7.62318e-07	0.00896324	1.42538e-06	0.0150842	4.66985e-07	0.00494192	3.12785e-07	0.00445222	1.02734e-07	0.00146233
12530	26	2.7029e-07	0.00294545	9.0863e-08	0.000990167	2.18914e-06	0.0246788	7.13306e-07	0.00804132	1.82873e-06	0.0173082	5.96826e-07	0.00564872	2.33985e-06	0.0275486	7.61943e-07	0.00897086	1.41773e-06	0.0150984	4.6448e-07	0.00494658	3.14896e-07	0.00445537	1.03428e-07	0.00146337
12540	26	2.72143e-07	0.00294816	9.1486e-08	0.000991079	2.1867e-06	0.0247007	7.12511e-07	0.00804845	1.83488e-06	0.0173266	5.98832e-07	0.0056547	2.3373e-06	0.027572	7.61113e-07	0.00897848	1.41123e-06	0.0151126	4.62351e-07	0.00495121	3.21773e-07	0.00445857	1.05686e-07	0.00146442
12550	26	2.71537e-07	0.00295088	9.1282e-08	0.000991992	2.18015e-06	0.0247225	7.10378e-07	0.00805556	1.83831e-06	0.0173449	5.99951e-07	0.00566069	2.33257e-06	0.0275954	7.59573e-07	0.00898608	1.40603e-06	0.0151267	4.60647e-07	0.00495583	3.28722e-07	0.0044618	1.07969e-07	0.00146548
12560	26	2.69459e-07	0.00295359	9.05834e-08	0.000992902	2.17819e-06	0.0247443	7.09739e-07	0.00806267	1.83335e-06	0.0173633	5.98331e-07	0.00566668	2.32676e-06	0.0276187	7.57682e-07	0.00899367	1.40412e-06	0.0151407	4.6002e-07	0.00496043	3.33034e-07	0.00446511	1.09385e-07	0.00146657
12570	26	2.71973e-07	0.0029563	9.14286e-08	0.000993814	2.19671e-06	0.0247662	7.15775e-07	0.00806979	1.8384e-06	0.0173816	5.99979e-07	0.00567267	2.31871e-06	0.0276419	7.55059e-07	0.00900123	1.40818e-06	0.0151548	4.6135e-07	0.00496504	3.34489e-07	0.00446844	1.09863e-07	0.00146766
12580	26	2.77642e-07	0.00295905	9.33344e-08	0.000994738	2.2011e-06	0.0247882	7.17205e-07	0.00807696	1.84386e-06	0.0174	6.01762e-07	0.00567868	2.31241e-06	0.027665	7.53008e-07	0.00900877	1.41325e-06	0.0151689	4.63013e-07	0.00496966	3.33534e-07	0.00447178	1.09549e-07	0.00146876
12590	26	2.83192e-07	0.00296184	9.52002e-08	0.000995678	2.20098e-06	0.0248102	7.17164e-07	0.00808413	1.8402e-06	0.0174185	6.00569e-07	0.00568469	2.31277e-06	0.0276882	7.53125e-07	0.0090163	1.41343e-06	0.015183	4.6307e-07	0.00497429	3.30477e-07	0.0044751	1.08545e-07	0.00146985
12600	26	2.75997e-07	0.00296464	9.27814e-08	0.000996617	2.19657e-06	0.0248322	7.15728e-07	0.00809129	1.83332e-06	0.0174368	5.98323e-07	0.00569068	2.30997e-06	0.0277113	7.52212e-07	0.00902383	1.41526e-06	0.0151972	4.63669e-07	0.00497893	3.23499e-07	0.00447835	1.06253e-07	0.00147092
12610	26	2.7381e-07	0.00296739	9.20463e-08	0.000997542	2.19252e-06	0.0248541	7.14407e-07	0.00809845	1.83126e-06	0.0174551	5.97649e-07	0.00569666	2.30398e-06	0.0277343	7.50262e-07	0.00903134	1.41878e-06	0.0152113	4.64823e-07	0.00498357	3.12986e-07	0.00448154	1.028e-07	0.00147196
12620	26	2.75401e-07	0.00297014	9.25812e-08	0.000998466	2.19566e-06	0.0248761	7.15431e-07	0.0081056	1.82757e-06	0.0174734	5.96447e-07	0.00570263	2.30527e-06	0.0277574	7.50682e-07	0.00903885	1.4182e-06	0.0152255	4.64633e-07	0.00498821	3.12399e-07	0.00448469	1.02608e-07	0.001473
12630	26	2.7679e-07	0.00297289	9.30481e-08	0.000999392	2.20104e-06	0.0248981	7.17186e-07	0.00811276	1.82624e-06	0.0174917	5.96011e-07	0.0057086	2.31061e-06	0.0277805	7.5242e-07	0.00904636	1.4165e-06	0.0152397	4.64076e-07	0.00499286	3.15235e-07	0.00448782	1.03539e-07	0.00147402
12640	26	2.73152e-07	0.00297563	9.18252e-08	0.00100031	2.20619e-06	0.0249201	7.18862e-07	0.00811994	1.82832e-06	0.01751	5.9669e-07	0.00571456	2.3189e-06	0.0278036	7.5512e-07	0.0090539	1.41783e-06	0.0152539	4.64513e-07	0.0049975	3.13018e-07	0.00449095	1.02811e-07	0.00147506
12650	26	2.65002e-07	0.00297833	8.90852e-08	0.00100122	2.20065e-06	0.0249421	7.17058e-07	0.00812711	1.82669e-06	0.0175283	5.9616e-07	0.00572052	2.32569e-06	0.0278268	7.57331e-07	0.00906146	1.41378e-06	0.015268	4.63184e-07	0.00500214	3.085e-07	0.00449406	1.01327e-07	0.00147608
12660	26	2.52223e-07	0.00298091	8.47892e-08	0.00100209	2.19623e-06	0.0249641	7.15618e-07	0.00813428	1.82251e-06	0.0175465	5.94795e-07	0.00572648	2.32958e-06	0.0278501	7.586e-07	0.00906904	1.40694e-06	0.0152821	4.60945e-07	0.00500676	3.01545e-07	0.00449711	9.90424e-08	0.00147708
12670	26	2.39473e-07	0.00298337	8.05034e-08	0.00100292	2.19364e-06	0.024986	7.14773e-07	0.00814143	1.81711e-06	0.0175647	5.93034e-07	0.00573242	2.33088e-06	0.0278734	7.59022e-07	0.00907663	1.40487e-06	0.0152962	4.60265e-07	0.00501137	2.94654e-07	0.0045001	9.67792e-08	0.00147806
12680	26	2.33071e-07	0.00298574	7.83512e-08	0.00100371	2.18565e-06	0.0250079	7.12172e-07	0.00814856	1.81243e-06	0.0175828	5.91505e-07	0.00573834	2.33269e-06	0.0278967	7.5961e-07	0.00908422	1.4019e-06	0.0153102	4.59294e-07	0.00501597	2.94828e-07	0.00450305	9.68365e-08	0.00147903
12690	26	2.29706e-07	0.00298806	7.722e-08	0.00100449	2.18161e-06	0.0250298	7.10855e-07	0.00815568	1.81442e-06	0.017601	5.92154e-07	0.00574426	2.33042e-06	0.0279201	7.58872e-07	0.00909181	1.40149e-06	0.0153243	4.59159e-07	0.00502056	2.97263e-07	0.00450601	9.76361e-08	0.00148
12700	26	2.31456e-07	0.00299037	7.78081e-08	0.00100527	2.18237e-06	0.0250516	7.111e-07	0.00816279	1.82173e-06	0.0176192	5.94539e-07	0.00575019	2.32575e-06	0.0279433	7.5735e-07	0.0090994	1.40572e-06	0.0153383	4.60546e-07	0.00502516	2.96699e-07	0.00450897	9.7451e-08	0.00148097
12710	26	2.4227e-07	0.00299273	8.14434e-08	0.00100606	2.18341e-06	0.0250734	7.1144e-07	0.0081699	1.82921e-06	0.0176374	5.96981e-07	0.00575615	2.32489e-06	0.0279666	7.57072e-07	0.00910697	1.4151e-06	0.0153524	4.63619e-07	0.00502978	2.89113e-07	0.00451191	9.49592e-08	0.00148194
12720	26	2.40529e-07	0.00299514	8.08584e-08	0.00100687	2.17854e-06	0.0250952	7.09852e-07	0.00817701	1.83417e-06	0.0176557	5.98601e-07	0.00576213	2.33445e-06	0.0279899	7.60185e-07	0.00911456	1.41773e-06	0.0153666	4.64478e-07	0.00503442	2.91725e-07	0.00451482	9.5817e-08	0.00148289
12730	26	2.4518e-07	0.00299758	8.24218e-08	0.00100769	2.17714e-06	0.025117	7.09398e-07	0.0081841	1.83934e-06	0.0176741	6.00286e-07	0.00576813	2.34072e-06	0.0280133	7.62226e-07	0.00912217	1.42463e-06	0.0153808	4.66739e-07	0.00503908	3.04667e-07	0.00451783	1.00068e-07	0.00148388
12740	26	2.53407e-07	0.00300005	8.51875e-08	0.00100852	2.17885e-06	0.0251388	7.09953e-07	0.0081912	1.84421e-06	0.0176925	6.01876e-07	0.00577413	2.34465e-06	0.0280367	7.63505e-07	0.0091298	1.43356e-06	0.015395	4.69665e-07	0.00504375	3.22722e-07	0.00452092	1.05998e-07	0.0014849
12750	26	2.5855e-07	0.00300261	8.69162e-08	0.00100938	2.19286e-06	0.0251607	7.1452e-07	0.00819832	1.84408e-06	0.017711	6.01834e-07	0.00578015	2.34417e-06	0.0280601	7.63348e-07	0.00913743	1.43601e-06	0.0154094	4.70467e-07	0.00504845	3.27652e-07	0.00452417	1.07617e-07	0.00148596
12760	26	2.47338e-07	0.00300512	8.31472e-08	0.00101023	2.20048e-06	0.0251826	7.17004e-07	0.00820548	1.8458e-06	0.0177294	6.02397e-07	0.00578617	2.34478e-06	0.0280836	7.63548e-07	0.00914507	1.43738e-06	0.0154238	4.70916e-07	0.00505316	3.30351e-07	0.00452746	1.08504e-07	0.00148705
12770	26	2.35629e-07	0.00300753	7.92111e-08	0.00101104	2.20339e-06	0.0252046	7.17949e-07	0.00821266	1.84006e-06	0.0177478	6.00521e-07	0.00579218	2.34248e-06	0.028107	7.628e-07	0.0091527	1.43592e-06	0.0154381	4.70439e-07	0.00505786	3.27336e-07	0.00453074	1.07514e-07	0.00148812
12780	26	2.25971e-07	0.00300987	7.59642e-08	0.00101182	2.2031e-06	0.0252267	7.17854e-07	0.00821984	1.82922e-06	0.0177662	5.96985e-07	0.00579818	2.33796e-06	0.0281304	7.61326e-07	0.00916032	1.43279e-06	0.0154525	4.69414e-07	0.00506257	3.20593e-07	0.00453399	1.05299e-07	0.00148919
12790	26	2.33856e-07	0.00301218	7.86151e-08	0.0010126	2.19415e-06	0.0252486	7.1494e-07	0.00822699	1.82594e-06	0.0177845	5.95915e-07	0.00580414	2.33226e-06	0.0281538	7.5947e-07	0.00916792	1.43425e-06	0.0154668	4.69892e-07	0.00506726	3.16144e-07	0.00453717	1.03838e-07	0.00149024
12800	26	2.3001e-07	0.00301447	7.7322e-08	0.00101337	2.19219e-06	0.0252706	7.14302e-07	0.00823414	1.82311e-06	0.0178027	5.94991e-07	0.00581009	2.33129e-06	0.0281771	7.59154e-07	0.00917552	1.43187e-06	0.0154811	4.69113e-07	0.00507196	3.11666e-07	0.0045403	1.02367e-07	0.00149126
12810	26	2.19701e-07	0.00301674	7.38565e-08	0.00101413	2.19341e-06	0.0252925	7.14698e-07	0.00824129	1.82142e-06	0.0178209	5.94437e-07	0.00581604	2.33201e-06	0.0282004	7.5939e-07	0.00918311	1.42648e-06	0.0154954	4.67345e-07	0.00507664	3.06923e-07	0.0045434	1.00809e-07	0.00149228
12820	26	2.15113e-07	0.00301891	7.23142e-08	0.00101486	2.18614e-06	0.0253144	7.12329e-07	0.00824842	1.82626e-06	0.0178392	5.96019e-07	0.005822	2.32357e-06	0.0282237	7.56642e-07	0.00919068	1.41608e-06	0.0155096	4.63939e-07	0.00508129	3.00321e-07	0.00454643	9.86407e-08	0.00149328
12830	26	2.11385e-07	0.00302104	7.1061e-08	0.00101558	2.17815e-06	0.0253362	7.09727e-07	0.00825553	1.83036e-06	0.0178575	5.97357e-07	0.00582796	2.31606e-06	0.0282469	7.54195e-07	0.00919824	1.40708e-06	0.0155238	4.60989e-07	0.00508592	2.96736e-07	0.00454943	9.74631e-08	0.00149426
12840	26	2.08165e-07	0.00302314	6.99785e-08	0.00101628	2.17033e-06	0.025358	7.07177e-07	0.00826261	1.83219e-06	0.0178758	5.97953e-07	0.00583394	2.31152e-06	0.02827	7.52716e-07	0.00920577	1.40115e-06	0.0155378	4.59049e-07	0.00509052	2.98408e-07	0.00455241	9.80121e-08	0.00149524
12850	26	2.05076e-07	0.00302521	6.89399e-08	0.00101698	2.16724e-06	0.0253797	7.06172e-07	0.00826968	1.81789e-06	0.017894	5.93286e-07	0.00583989	2.30779e-06	0.0282931	7.51503e-07	0.0092133	1.39282e-06	0.0155518	4.56319e-07	0.0050951	2.99972e-07	0.0045554	9.8526e-08	0.00149622
12860	26	2.02029e-07	0.00302724	6.79157e-08	0.00101766	2.17003e-06	0.0254014	7.07079e-07	0.00827675	1.8007e-06	0.0179121	5.87676e-07	0.0058458	2.3018e-06	0.0283162	7.49552e-07	0.0092208	1.388e-06	0.0155657	4.5474e-07	0.00509965	3.00743e-07	0.0045584	9.8779e-08	0.00149721
12870	26	1.99611e-07	0.00302926	6.71028e-08	0.00101834	2.17766e-06	0.0254231	7.09568e-07	0.00828384	1.79664e-06	0.0179301	5.8635e-07	0.00585167	2.29132e-06	0.0283391	7.4614e-07	0.00922828	1.3918e-06	0.0155796	4.55983e-07	0.00510421	3.00099e-07	0.0045614	9.85675e-08	0.00149819
12880	26	2.00813e-07	0.00303126	6.75069e-08	0.00101901	2.1819e-06	0.0254449	7.10948e-07	0.00829094	1.79909e-06	0.0179481	5.87151e-07	0.00585754	2.28974e-06	0.028362	7.45627e-07	0.00923574	1.39104e-06	0.0155935	4.55736e-07	0.00510876	2.96083e-07	0.00456437	9.72485e-08	0.00149917
12890	26	2.01775e-07	0.00303327	6.78305e-08	0.00101969	2.18388e-06	0.0254667	7.11593e-07	0.00829805	1.80481e-06	0.0179661	5.89018e-07	0.00586342	2.29241e-06	0.0283849	7.46494e-07	0.0092432	1.39035e-06	0.0156074	4.55508e-07	0.00511332	2.89843e-07	0.00456731	9.51991e-08	0.00150014
12900	26	2.01806e-07	0.00303529	6.78409e-08	0.00102037	2.18331e-06	0.0254885	7.11408e-07	0.00830516	1.81212e-06	0.0179842	5.91402e-07	0.00586932	2.29541e-06	0.0284079	7.47471e-07	0.00925067	1.39626e-06	0.0156213	4.57446e-07	0.00511789	2.82227e-07	0.00457017	9.26975e-08	0.00150108
12910	26	2.01036e-07	0.0030373	6.7582e-08	0.00102105	2.18004e-06	0.0255104	7.10344e-07	0.00831227	1.81364e-06	0.0180023	5.91901e-07	0.00587524	2.29834e-06	0.0284309	7.48425e-07	0.00925815	1.39065e-06	0.0156353	4.55607e-07	0.00512245	2.82019e-07	0.004573	9.26293e-08	0.001502
12920	26	1.99414e-07	0.0030393	6.70367e-08	0.00102172	2.17303e-06	0.0255321	7.08058e-07	0.00831936	1.81339e-06	0.0180204	5.91818e-07	0.00588115	2.29368e-06	0.0284538	7.46909e-07	0.00926562	1.38716e-06	0.0156491	4.54464e-07	0.005127	2.89024e-07	0.00457586	9.49299e-08	0.00150294
12930	26	1.96333e-07	0.00304128	6.60008e-08	0.00102238	2.16451e-06	0.0255538	7.05281e-07	0.00832643	1.81303e-06	0.0180386	5.91701e-07	0.00588707	2.28534e-06	0.0284767	7.44193e-07	0.00927309	1.38653e-06	0.015663	4.54258e-07	0.00513155	2.98793e-07	0.00457878	9.81388e-08	0.0015039
12940	26	1.90093e-07	0.0030432	6.39031e-08	0.00102303	2.15268e-06	0.0255754	7.01428e-07	0.00833346	1.81574e-06	0.0180567	5.92584e-07	0.00589299	2.28685e-06	0.0284996	7.44684e-07	0.00928053	1.38628e-06	0.0156769	4.54176e-07	0.00513609	2.99521e-07	0.00458177	9.83779e-08	0.00150489
12950	26	1.83e-07	0.00304507	6.15187e-08	0.00102365	2.13881e-06	0.0255969	6.96907e-07	0.00834045	1.81319e-06	0.0180749	5.91751e-07	0.00589891	2.28821e-06	0.0285225	7.45127e-07	0.00928798	1.3894e-06	0.0156908	4.55199e-07	0.00514064	2.92293e-07	0.00458473	9.60039e-08	0.00150585
12960	26	1.75225e-07	0.00304686	5.89049e-08	0.00102426	2.13647e-06	0.0256182	6.96145e-07	0.00834742	1.80996e-06	0.018093	5.90697e-07	0.00590483	2.28896e-06	0.0285453	7.45372e-07	0.00929543	1.39313e-06	0.0157047	4.5642e-07	0.00514519	2.93206e-07	0.00458766	9.63036e-08	0.00150682
12970	26	1.70172e-07	0.00304859	5.72064e-08	0.00102484	2.13322e-06	0.0256396	6.95087e-07	0.00835438	1.80721e-06	0.0181111	5.898e-07	0.00591073	2.28398e-06	0.0285682	7.43749e-07	0.00930287	1.38645e-06	0.0157186	4.54231e-07	0.00514974	2.93503e-07	0.00459058	9.64012e-08	0.00150778
12980	26	1.65843e-07	0.00305028	5.57512e-08	0.00102541	2.13e-06	0.0256609	6.94036e-07	0.00836132	1.80616e-06	0.0181291	5.8946e-07	0.00591663	2.27323e-06	0.028591	7.40247e-07	0.00931029	1.37679e-06	0.0157324	4.51065e-07	0.00515427	2.86327e-07	0.00459348	9.40442e-08	0.00150873
12990	26	1.6033e-07	0.00305191	5.3898e-08	0.00102596	2.13338e-06	0.0256822	6.95137e-07	0.00836827	1.81107e-06	0.0181472	5.91061e-07	0.00592253	2.25977e-06	0.0286137	7.35867e-07	0.00931768	1.37911e-06	0.0157462	4.51827e-07	0.00515879	2.72517e-07	0.00459628	8.95083e-08	0.00150965
13000	26	1.52327e-07	0.00305347	5.12077e-08	0.00102648	2.13956e-06	0.0257036	6.97151e-07	0.00837523	1.80301e-06	0.0181653	5.88432e-07	0.00592842	2.25596e-06	0.0286362	7.34624e-07	0.00932503	1.3765e-06	0.0157599	4.50973e-07	0.0051633	2.58921e-07	0.00459894	8.50427e-08	0.00151052
13010	26	1.44847e-07	0.00305495	4.8693e-08	0.00102698	2.13676e-06	0.0257249	6.96238e-07	0.00838219	1.79273e-06	0.0181832	5.85075e-07	0.00593429	2.25787e-06	0.0286588	7.35247e-07	0.00933238	1.37523e-06	0.0157737	4.50557e-07	0.00516781	2.54568e-07	0.00460151	8.36131e-08	0.00151137
13020	26	1.38416e-07	0.00305637	4.65311e-08	0.00102745	2.13084e-06	0.0257463	6.94309e-07	0.00838915	1.7862e-06	0.0182012	5.82944e-07	0.00594013	2.25649e-06	0.0286814	7.34796e-07	0.00933973	1.37571e-06	0.0157875	4.50711e-07	0.00517231	2.52065e-07	0.00460404	8.27908e-08	0.0015122
13030	26	1.33477e-07	0.00305773	4.48707e-08	0.00102791	2.12939e-06	0.0257676	6.93839e-07	0.00839609	1.78972e-06	0.018219	5.84094e-07	0.00594597	2.25443e-06	0.0287039	7.34126e-07	0.00934708	1.377e-06	0.0158012	4.51134e-07	0.00517682	2.42061e-07	0.0046065	7.95051e-08	0.00151301
13040	26	1.27093e-07	0.00305904	4.27246e-08	0.00102835	2.12944e-06	0.0257889	6.93856e-07	0.00840303	1.80029e-06	0.018237	5.87542e-07	0.00595182	2.2597e-06	0.0287265	7.35842e-07	0.00935442	1.37555e-06	0.015815	4.5066e-07	0.00518133	2.32914e-07	0.00460889	7.65006e-08	0.00151379
13050	26	1.2262e-07	0.00306028	4.12209e-08	0.00102877	2.12571e-06	0.0258102	6.92639e-07	0.00840996	1.80232e-06	0.018255	5.88206e-07	0.0059577	2.26101e-06	0.0287491	7.36269e-07	0.00936179	1.36839e-06	0.0158287	4.48315e-07	0.00518582	2.32021e-07	0.00461122	7.62072e-08	0.00151456
13060	26	1.21944e-07	0.00306151	4.09937e-08	0.00102918	2.12033e-06	0.0258314	6.90887e-07	0.00841688	1.7949e-06	0.018273	5.85783e-07	0.00596357	2.25961e-06	0.0287717	7.35815e-07	0.00936914	1.35866e-06	0.0158423	4.45125e-07	0.0051903	2.36615e-07	0.00461356	7.77164e-08	0.00151532
13070	26	1.31227e-07	0.00306278	4.41143e-08	0.00102961	2.12539e-06	0.0258526	6.92534e-07	0.0084238	1.78581e-06	0.0182909	5.82818e-07	0.00596942	2.25587e-06	0.0287943	7.34596e-07	0.00937649	1.35144e-06	0.0158559	4.42762e-07	0.00519474	2.42137e-07	0.00461595	7.95301e-08	0.00151611
13080	26	1.40464e-07	0.00306416	4.72195e-08	0.00103007	2.12909e-06	0.0258739	6.93739e-07	0.00843073	1.78389e-06	0.0183087	5.8219e-07	0.00597524	2.24908e-06	0.0288168	7.32384e-07	0.00938383	1.35599e-06	0.0158694	4.44251e-07	0.00519918	2.46076e-07	0.0046184	8.08238e-08	0.00151692
13090	26	1.50881e-07	0.0030656	5.07213e-08	0.00103056	2.13213e-06	0.0258952	6.94732e-07	0.00843767	1.7842e-06	0.0183266	5.82293e-07	0.00598106	2.2541e-06	0.0288393	7.34021e-07	0.00939117	1.36148e-06	0.015883	4.4605e-07	0.00520362	2.50797e-07	0.00462088	8.23743e-08	0.00151773
13100	26	1.67617e-07	0.0030672	5.63476e-08	0.0010311	2.13328e-06	0.0259165	6.95105e-07	0.00844462	1.78801e-06	0.0183444	5.83536e-07	0.00598689	2.26929e-06	0.0288619	7.38966e-07	0.00939853	1.3582e-06	0.0158966	4.44976e-07	0.00520808	2.61522e-07	0.00462345	8.58969e-08	0.00151857
13110	26	1.74315e-07	0.00306891	5.85991e-08	0.00103167	2.13501e-06	0.0259379	6.95671e-07	0.00845158	1.78241e-06	0.0183623	5.81706e-07	0.00599271	2.27594e-06	0.0288847	7.41132e-07	0.00940593	1.34812e-06	0.0159101	4.41673e-07	0.0052125	2.69679e-07	0.00462611	8.85761e-08	0.00151945
13120	26	1.75509e-07	0.00307065	5.90005e-08	0.00103225	2.13754e-06	0.0259592	6.96494e-07	0.00845853	1.77292e-06	0.0183801	5.7861e-07	0.00599852	2.27677e-06	0.0289074	7.41402e-07	0.00941334	1.3372e-06	0.0159236	4.38096e-07	0.00521691	2.75902e-07	0.00462882	9.06202e-08	0.00152034
13130	26	1.68688e-07	0.00307236	5.67077e-08	0.00103283	2.14396e-06	0.0259807	6.98587e-07	0.00846551	1.76533e-06	0.0183978	5.76134e-07	0.00600429	2.27696e-06	0.0289302	7.41464e-07	0.00942076	1.34214e-06	0.015937	4.39714e-07	0.0052213	2.76213e-07	0.00463158	9.07224e-08	0.00152125
13140	26	1.69787e-07	0.00307407	5.7077e-08	0.00103341	2.1439e-06	0.0260021	6.98565e-07	0.00847249	1.77101e-06	0.0184155	5.77988e-07	0.00601008	2.27934e-06	0.028953	7.4224e-07	0.00942818	1.34967e-06	0.0159505	4.4218e-07	0.00522572	2.89655e-07	0.00463446	9.51371e-08	0.00152219
13150	26	1.74245e-07	0.00307578	5.85758e-08	0.00103398	2.14108e-06	0.0260235	6.97647e-07	0.00847948	1.78232e-06	0.0184332	5.81678e-07	0.00601586	2.28266e-06	0.0289758	7.43319e-07	0.0094356	1.35829e-06	0.015964	4.45005e-07	0.00523014	3.08666e-07	0.00463739	1.01382e-07	0.00152315
13160	26	1.8582e-07	0.00307761	6.24669e-08	0.00103459	2.15054e-06	0.026045	7.0073e-07	0.00848648	1.7865e-06	0.0184511	5.83041e-07	0.00602169	2.2811e-06	0.0289986	7.42813e-07	0.00944303	1.36668e-06	0.0159776	4.47753e-07	0.00523461	3.06853e-07	0.00464046	1.00786e-07	0.00152416
13170	26	1.94055e-07	0.00307949	6.52351e-08	0.00103523	2.15904e-06	0.0260665	7.03498e-07	0.0084935	1.79153e-06	0.0184689	5.84683e-07	0.00602753	2.284e-06	0.0290214	7.43756e-07	0.00945047	1.37482e-06	0.0159913	4.50421e-07	0.0052391	3.04247e-07	0.00464352	9.993e-08	0.00152517
13180	26	1.97182e-07	0.00308144	6.62865e-08	0.00103588	2.16431e-06	0.0260882	7.05216e-07	0.00850054	1.79601e-06	0.0184869	5.86147e-07	0.00603338	2.29222e-06	0.0290443	7.46431e-07	0.00945792	1.38113e-06	0.0160051	4.52487e-07	0.00524362	3.02774e-07	0.00464656	9.94464e-08	0.00152616
13190	26	2.01292e-07	0.00308344	6.76681e-08	0.00103656	2.16495e-06	0.0261098	7.05426e-07	0.00850759	1.78724e-06	0.0185048	5.83283e-07	0.00603922	2.29277e-06	0.0290672	7.46612e-07	0.00946538	1.37859e-06	0.0160189	4.51655e-07	0.00524813	3.03285e-07	0.00464959	9.96139e-08	0.00152716
13200	26	2.07141e-07	0.00308549	6.96344e-08	0.00103724	2.16601e-06	0.0261315	7.05772e-07	0.00851465	1.78394e-06	0.0185226	5.82208e-07	0.00604505	2.2902e-06	0.0290901	7.45776e-07	0.00947284	1.37587e-06	0.0160327	4.50765e-07	0.00525265	2.99027e-07	0.0046526	9.82155e-08	0.00152815
13210	26	2.13412e-07	0.00308759	7.17423e-08	0.00103795	2.1667e-06	0.0261531	7.05994e-07	0.00852171	1.78582e-06	0.0185405	5.8282e-07	0.00605088	2.28541e-06	0.029113	7.44216e-07	0.00948029	1.37315e-06	0.0160464	4.49873e-07	0.00525715	3.0269e-07	0.00465561	9.94187e-08	0.00152914
13220	26	2.16593e-07	0.00308974	7.28116e-08	0.00103867	2.16261e-06	0.0261748	7.04664e-07	0.00852876	1.79054e-06	0.0185584	5.84362e-07	0.00605672	2.27704e-06	0.0291358	7.41491e-07	0.00948772	1.3678e-06	0.0160601	4.48121e-07	0.00526164	3.10885e-07	0.00465868	1.0211e-07	0.00153015
13230	26	2.22359e-07	0.00309193	7.47501e-08	0.00103941	2.16252e-06	0.0261964	7.04633e-07	0.00853581	1.7957e-06	0.0185763	5.86045e-07	0.00606256	2.26877e-06	0.0291586	7.38797e-07	0.00949512	1.36071e-06	0.0160737	4.458e-07	0.00526611	3.15164e-07	0.00466181	1.03516e-07	0.00153117
13240	26	2.2845e-07	0.00309418	7.67976e-08	0.00104016	2.16707e-06	0.026218	7.06115e-07	0.00854286	1.79601e-06	0.0185943	5.86146e-07	0.00606842	2.2642e-06	0.0291812	7.37309e-07	0.0095025	1.35182e-06	0.0160873	4.42885e-07	0.00527055	3.10965e-07	0.00466493	1.02136e-07	0.0015322
13250	26	2.2687e-07	0.00309646	7.62666e-08	0.00104093	2.16656e-06	0.0262397	7.05948e-07	0.00854992	1.78853e-06	0.0186122	5.83703e-07	0.00607428	2.26364e-06	0.0292039	7.37127e-07	0.00950988	1.34386e-06	0.0161008	4.40278e-07	0.00527497	3.10177e-07	0.00466804	1.01878e-07	0.00153322
13260	26	2.24728e-07	0.00309871	7.55463e-08	0.00104169	2.15914e-06	0.0262613	7.03531e-07	0.00855696	1.78402e-06	0.01863	5.82233e-07	0.0060801	2.25404e-06	0.0292265	7.33999e-07	0.00951723	1.3426e-06	0.0161142	4.39863e-07	0.00527937	3.13765e-07	0.00467116	1.03056e-07	0.00153424
13270	26	2.21699e-07	0.00310094	7.45282e-08	0.00104244	2.15826e-06	0.0262829	7.03244e-07	0.008564	1.78461e-06	0.0186479	5.82427e-07	0.00608593	2.23857e-06	0.0292489	7.28961e-07	0.00952454	1.3489e-06	0.0161277	4.4193e-07	0.00528378	3.12547e-07	0.00467429	1.02656e-07	0.00153527
13280	26	2.17021e-07	0.00310313	7.29557e-08	0.00104318	2.15754e-06	0.0263045	7.03012e-07	0.00857103	1.78598e-06	0.0186657	5.82874e-07	0.00609175	2.22976e-06	0.0292713	7.26094e-07	0.00953182	1.35526e-06	0.0161412	4.44011e-07	0.00528821	3.26227e-07	0.00467748	1.07149e-07	0.00153632
13290	26	2.11773e-07	0.00310528	7.11913e-08	0.0010439	2.15566e-06	0.0263261	7.02398e-07	0.00857806	1.77524e-06	0.0186835	5.79369e-07	0.00609756	2.23326e-06	0.0292936	7.27232e-07	0.00953909	1.3569e-06	0.0161548	4.44549e-07	0.00529265	3.26179e-07	0.00468073	1.07134e-07	0.00153739
13300	26	2.07359e-07	0.00310737	6.97076e-08	0.0010446	2.15549e-06	0.0263476	7.02343e-07	0.00858508	1.77024e-06	0.0187013	5.77735e-07	0.00610335	2.24504e-06	0.029316	7.3107e-07	0.00954638	1.34829e-06	0.0161683	4.41728e-07	0.00529708	3.19311e-07	0.00468397	1.04878e-07	0.00153845
13310	26	2.03733e-07	0.00310943	6.84884e-08	0.00104529	2.14767e-06	0.0263691	6.99795e-07	0.00859209	1.76736e-06	0.018719	5.76797e-07	0.00610912	2.24764e-06	0.0293384	7.31914e-07	0.00955369	1.34029e-06	0.0161817	4.39107e-07	0.00530148	3.1269e-07	0.00468713	1.02703e-07	0.00153949
13320	26	1.98515e-07	0.00311143	6.67343e-08	0.00104597	2.14066e-06	0.0263906	6.97511e-07	0.00859908	1.76998e-06	0.0187367	5.77651e-07	0.0061149	2.24418e-06	0.0293609	7.3079e-07	0.009561	1.33514e-06	0.0161951	4.3742e-07	0.00530587	3.10384e-07	0.00469025	1.01946e-07	0.00154051
13330	26	1.89923e-07	0.00311337	6.38461e-08	0.00104662	2.13412e-06	0.0264119	6.95381e-07	0.00860604	1.771e-06	0.0187544	5.77985e-07	0.00612067	2.23578e-06	0.0293833	7.28053e-07	0.0095683	1.33408e-06	0.0162084	4.37073e-07	0.00531024	3.02413e-07	0.0046933	9.93276e-08	0.00154152
13340	26	1.78878e-07	0.00311522	6.01332e-08	0.00104724	2.12287e-06	0.0264332	6.91713e-07	0.00861298	1.7705e-06	0.0187721	5.77821e-07	0.00612645	2.22346e-06	0.0294056	7.24041e-07	0.00957556	1.33396e-06	0.0162218	4.37035e-07	0.00531461	2.91404e-07	0.00469627	9.57116e-08	0.00154249
13350	26	1.65103e-07	0.00311694	5.55024e-08	0.00104782	2.1252e-06	0.0264545	6.92472e-07	0.00861991	1.77183e-06	0.0187898	5.78253e-07	0.00613223	2.21428e-06	0.0294278	7.21052e-07	0.00958279	1.33303e-06	0.0162351	4.36729e-07	0.00531898	2.79026e-07	0.00469912	9.16462e-08	0.00154343
13360	26	1.50209e-07	0.00311852	5.04954e-08	0.00104835	2.13431e-06	0.0264758	6.95441e-07	0.00862684	1.77503e-06	0.0188075	5.79298e-07	0.00613803	2.21635e-06	0.0294499	7.21728e-07	0.00959	1.33076e-06	0.0162484	4.35987e-07	0.00532334	2.6753e-07	0.00470185	8.78704e-08	0.00154433
13370	26	1.40827e-07	0.00311998	4.73415e-08	0.00104884	2.13777e-06	0.0264971	6.9657e-07	0.0086338	1.7787e-06	0.0188253	5.80497e-07	0.00614382	2.22296e-06	0.0294721	7.2388e-07	0.00959723	1.33427e-06	0.0162618	4.37137e-07	0.00532771	2.64579e-07	0.00470452	8.69009e-08	0.0015452
13380	26	1.42567e-07	0.0031214	4.79265e-08	0.00104932	2.13912e-06	0.0265185	6.97008e-07	0.00864077	1.77115e-06	0.018843	5.78032e-07	0.0061496	2.22631e-06	0.0294944	7.24969e-07	0.00960447	1.33519e-06	0.0162751	4.37437e-07	0.00533208	2.59745e-07	0.00470714	8.53133e-08	0.00154606
13390	26	1.40541e-07	0.00312281	4.72456e-08	0.00104979	2.13614e-06	0.0265399	6.96038e-07	0.00864773	1.76212e-06	0.0188607	5.75086e-07	0.00615538	2.22624e-06	0.0295166	7.24946e-07	0.00961172	1.33461e-06	0.0162885	4.37247e-07	0.00533645	2.56112e-07	0.00470972	8.41201e-08	0.00154691
13400	26	1.30343e-07	0.00312416	4.38173e-08	0.00105024	2.13808e-06	0.0265613	6.9667e-07	0.0086547	1.76619e-06	0.0188784	5.76415e-07	0.00616114	2.22288e-06	0.0295389	7.23854e-07	0.00961896	1.33552e-06	0.0163018	4.37546e-07	0.00534083	2.58693e-07	0.0047123	8.49679e-08	0.00154776
13410	26	1.23428e-07	0.00312543	4.14926e-08	0.00105067	2.13692e-06	0.0265826	6.96293e-07	0.00866166	1.77e-06	0.018896	5.77658e-07	0.00616691	2.21568e-06	0.0295611	7.2151e-07	0.00962619	1.33773e-06	0.0163152	4.3827e-07	0.00534521	2.66923e-07	0.00471493	8.76708e-08	0.00154862
13420	26	1.21577e-07	0.00312666	4.08703e-08	0.00105109	2.12826e-06	0.026604	6.93471e-07	0.00866861	1.77305e-06	0.0189137	5.78653e-07	0.00617269	2.21363e-06	0.0295832	7.20839e-07	0.0096334	1.33256e-06	0.0163285	4.36576e-07	0.00534958	2.71149e-07	0.00471761	8.9059e-08	0.0015495
13430	26	1.1921e-07	0.00312786	4.00747e-08	0.00105149	2.12318e-06	0.0266252	6.91816e-07	0.00867554	1.77461e-06	0.0189315	5.79163e-07	0.00617848	2.21216e-06	0.0296053	7.20363e-07	0.00964061	1.33223e-06	0.0163419	4.36468e-07	0.00535395	2.71429e-07	0.00472032	8.9151e-08	0.00155039
13440	26	1.13889e-07	0.00312902	3.82857e-08	0.00105188	2.11908e-06	0.0266464	6.90479e-07	0.00868245	1.77732e-06	0.0189492	5.80045e-07	0.00618428	2.21647e-06	0.0296275	7.21766e-07	0.00964782	1.33322e-06	0.0163552	4.36791e-07	0.00535831	2.73055e-07	0.00472305	8.96851e-08	0.00155129
13450	26	1.06625e-07	0.00313014	3.5844e-08	0.00105226	2.1147e-06	0.0266676	6.89052e-07	0.00868935	1.78203e-06	0.018967	5.81583e-07	0.00619008	2.22803e-06	0.0296497	7.2553e-07	0.00965505	1.33235e-06	0.0163685	4.36507e-07	0.00536268	2.76817e-07	0.00472579	9.09206e-08	0.00155219
13460	26	1.18592e-07	0.00313129	3.98669e-08	0.00105264	2.11621e-06	0.0266888	6.89542e-07	0.00869624	1.78486e-06	0.0189849	5.82506e-07	0.0061959	2.22806e-06	0.029672	7.25539e-07	0.00966231	1.33315e-06	0.0163818	4.36768e-07	0.00536705	2.70172e-07	0.00472852	8.87379e-08	0.00155308
13470	26	1.29717e-07	0.00313255	4.36067e-08	0.00105306	2.12164e-06	0.02671	6.91312e-07	0.00870315	1.78088e-06	0.0190027	5.81207e-07	0.00620172	2.23016e-06	0.0296943	7.26223e-07	0.00966957	1.33752e-06	0.0163952	4.38202e-07	0.00537142	2.75415e-07	0.00473125	9.04603e-08	0.00155398
13480	26	1.37396e-07	0.00313386	4.61883e-08	0.0010535	2.12172e-06	0.0267312	6.91338e-07	0.00871006	1.78388e-06	0.0190205	5.82186e-07	0.00620754	2.23111e-06	0.0297166	7.26532e-07	0.00967683	1.34202e-06	0.0164086	4.39677e-07	0.00537581	2.75407e-07	0.004734	9.04577e-08	0.00155488
13490	26	1.2773e-07	0.00313519	4.29387e-08	0.00105395	2.11949e-06	0.0267524	6.90612e-07	0.00871697	1.78976e-06	0.0190384	5.84105e-07	0.00621337	2.23185e-06	0.0297389	7.26774e-07	0.0096841	1.34368e-06	0.016422	4.40219e-07	0.00538021	2.70197e-07	0.00473673	8.87462e-08	0.00155578
13500	26	1.30232e-07	0.00313649	4.37799e-08	0.00105439	2.12025e-06	0.0267736	6.90861e-07	0.00872388	1.7912e-06	0.0190563	5.84578e-07	0.00621921	2.23522e-06	0.0297612	7.27871e-07	0.00969137	1.33358e-06	0.0164354	4.36908e-07	0.0053846	2.57649e-07	0.00473936	8.46248e-08	0.00155665
13510	26	1.37034e-07	0.00313782	4.60665e-08	0.00105484	2.12158e-06	0.0267948	6.91295e-07	0.00873079	1.79082e-06	0.0190742	5.84452e-07	0.00622506	2.24208e-06	0.0297836	7.30107e-07	0.00969866	1.32086e-06	0.0164487	4.32742e-07	0.00538894	2.51458e-07	0.0047419	8.25916e-08	0.00155748
13520	26	1.48505e-07	0.00313926	4.99228e-08	0.00105532	2.12665e-06	0.026816	6.92944e-07	0.00873771	1.79532e-06	0.0190921	5.85921e-07	0.00623092	2.24433e-06	0.029806	7.30838e-07	0.00970596	1.31167e-06	0.0164618	4.29732e-07	0.00539325	2.55529e-07	0.00474446	8.39285e-08	0.00155832
13530	26	1.5483e-07	0.00314076	5.20489e-08	0.00105583	2.13431e-06	0.0268373	6.95443e-07	0.00874465	1.80353e-06	0.0191101	5.88599e-07	0.00623678	2.2437e-06	0.0298285	7.30633e-07	0.00971327	1.30526e-06	0.0164749	4.27633e-07	0.00539755	2.67638e-07	0.00474706	8.79058e-08	0.00155917
13540	26	1.58202e-07	0.00314233	5.31825e-08	0.00105635	2.14484e-06	0.0268588	6.98873e-07	0.00875163	1.80433e-06	0.0191282	5.88862e-07	0.00624267	2.24768e-06	0.0298509	7.31929e-07	0.00972059	1.31276e-06	0.016488	4.30088e-07	0.00540184	2.79575e-07	0.0047498	9.18266e-08	0.00156007
13550	26	1.60599e-07	0.00314392	5.39882e-08	0.00105689	2.15689e-06	0.0268802	7.02798e-07	0.00875863	1.80455e-06	0.0191462	5.88932e-07	0.00624856	2.24298e-06	0.0298734	7.30399e-07	0.0097279	1.32143e-06	0.0165012	4.32928e-07	0.00540615	2.91832e-07	0.00475266	9.58522e-08	0.00156101
13560	26	1.61904e-07	0.00314554	5.44271e-08	0.00105743	2.17115e-06	0.0269019	7.07447e-07	0.00876568	1.80433e-06	0.0191642	5.88862e-07	0.00625445	2.24384e-06	0.0298958	7.30679e-07	0.0097352	1.32946e-06	0.0165145	4.3556e-07	0.00541049	3.01333e-07	0.00475563	9.89729e-08	0.00156199
13570	26	1.67421e-07	0.00314719	5.62817e-08	0.00105798	2.17047e-06	0.0269236	7.07224e-07	0.00877275	1.80589e-06	0.0191823	5.89371e-07	0.00626034	2.24399e-06	0.0299183	7.30727e-07	0.00974251	1.32603e-06	0.0165277	4.34435e-07	0.00541484	3.04513e-07	0.00475865	1.00017e-07	0.00156298
13580	26	1.75433e-07	0.00314891	5.8975e-08	0.00105856	2.16697e-06	0.0269453	7.06083e-07	0.00877982	1.81068e-06	0.0192004	5.90934e-07	0.00626624	2.241e-06	0.0299407	7.29753e-07	0.00974981	1.32605e-06	0.016541	4.34444e-07	0.00541919	3.03747e-07	0.00476169	9.97659e-08	0.00156398
13590	26	1.82241e-07	0.00315069	6.12636e-08	0.00105916	2.16086e-06	0.0269669	7.04091e-07	0.00878687	1.8134e-06	0.0192185	5.91821e-07	0.00627215	2.23624e-06	0.0299631	7.28202e-07	0.0097571	1.33186e-06	0.0165543	4.36348e-07	0.00542354	3.03645e-07	0.00476473	9.97322e-08	0.00156498
13600	26	1.82192e-07	0.00315251	6.12472e-08	0.00105977	2.15178e-06	0.0269885	7.01135e-07	0.0087939	1.80481e-06	0.0192366	5.8902e-07	0.00627806	2.23143e-06	0.0299854	7.26637e-07	0.00976437	1.34185e-06	0.0165677	4.39619e-07	0.00542792	3.0335e-07	0.00476776	9.96354e-08	0.00156597
13610	26	1.88873e-07	0.00315436	6.34932e-08	0.0010604	2.15579e-06	0.02701	7.02442e-07	0.00880092	1.80538e-06	0.0192546	5.89204e-07	0.00628395	2.22683e-06	0.0300077	7.25138e-07	0.00977163	1.34179e-06	0.0165811	4.396e-07	0.00543232	3.02803e-07	0.00477079	9.94558e-08	0.00156697
13620	26	1.9754e-07	0.0031563	6.64066e-08	0.00106105	2.15209e-06	0.0270315	7.01237e-07	0.00880793	1.81435e-06	0.0192728	5.9213e-07	0.00628986	2.23424e-06	0.03003	7.27551e-07	0.0097789	1.33883e-06	0.0165945	4.38631e-07	0.00543671	3.05411e-07	0.00477384	1.00312e-07	0.00156797
13630	26	2.02663e-07	0.00315829	6.81288e-08	0.00106172	2.14793e-06	0.0270531	6.99878e-07	0.00881494	1.82443e-06	0.0192909	5.9542e-07	0.00629579	2.24654e-06	0.0300524	7.31557e-07	0.0097862	1.33709e-06	0.0166079	4.38061e-07	0.0054411	3.0836e-07	0.00477691	1.01281e-07	0.00156898
13640	26	1.98996e-07	0.0031603	6.6896e-08	0.00106239	2.15412e-06	0.0270746	7.01897e-07	0.00882195	1.83185e-06	0.0193092	5.97841e-07	0.00630176	2.25915e-06	0.030075	7.35663e-07	0.00979353	1.33833e-06	0.0166212	4.38465e-07	0.00544548	3.09014e-07	0.00477999	1.01496e-07	0.00156999
13650	26	1.96086e-07	0.00316227	6.59178e-08	0.00106306	2.14852e-06	0.0270961	7.00071e-07	0.00882895	1.83379e-06	0.0193275	5.98477e-07	0.00630774	2.26615e-06	0.0300976	7.37943e-07	0.0098009	1.34483e-06	0.0166347	4.40594e-07	0.00544988	3.15669e-07	0.00478312	1.03682e-07	0.00157102
13660	26	1.93844e-07	0.00316422	6.51641e-08	0.00106371	2.1455e-06	0.0271175	6.99089e-07	0.00883595	1.83462e-06	0.0193459	5.98747e-07	0.00631373	2.27104e-06	0.0301203	7.39535e-07	0.00980829	1.34943e-06	0.0166481	4.42101e-07	0.00545429	3.21143e-07	0.00478631	1.0548e-07	0.00157206
13670	26	1.9199e-07	0.00316615	6.45409e-08	0.00106436	2.14857e-06	0.027139	7.00087e-07	0.00884295	1.8361e-06	0.0193642	5.9923e-07	0.00631971	2.27569e-06	0.030143	7.41051e-07	0.00981569	1.35062e-06	0.0166616	4.42492e-07	0.00545871	3.23653e-07	0.00478953	1.06304e-07	0.00157312
13680	26	2.00403e-07	0.00316814	6.73691e-08	0.00106503	2.15121e-06	0.0271605	7.00948e-07	0.00884995	1.83468e-06	0.0193826	5.98767e-07	0.0063257	2.27123e-06	0.0301657	7.39599e-07	0.00982309	1.35912e-06	0.0166752	4.45277e-07	0.00546316	3.25754e-07	0.00479278	1.06994e-07	0.00157419
13690	26	2.08631e-07	0.00317017	7.01352e-08	0.00106571	2.15462e-06	0.027182	7.02059e-07	0.00885697	1.83831e-06	0.019401	5.99952e-07	0.0063317	2.26505e-06	0.0301884	7.37584e-07	0.00983048	1.36721e-06	0.0166888	4.47929e-07	0.00546762	3.23732e-07	0.00479602	1.0633e-07	0.00157526
13700	26	2.1207e-07	0.00317227	7.12913e-08	0.00106642	2.16019e-06	0.0272036	7.03874e-07	0.008864	1.85209e-06	0.0194194	6.04448e-07	0.00633772	2.26586e-06	0.0302111	7.37848e-07	0.00983785	1.36939e-06	0.0167025	4.48642e-07	0.0054721	3.15829e-07	0.00479922	1.03734e-07	0.00157631
13710	26	2.1635e-07	0.00317441	7.27302e-08	0.00106714	2.16559e-06	0.0272252	7.05634e-07	0.00887104	1.85553e-06	0.0194379	6.05569e-07	0.00634377	2.27922e-06	0.0302338	7.422e-07	0.00984525	1.36925e-06	0.0167162	4.48595e-07	0.00547659	3.18184e-07	0.00480239	1.04508e-07	0.00157735
13720	26	2.13786e-07	0.00317656	7.18679e-08	0.00106786	2.17258e-06	0.0272469	7.07912e-07	0.00887811	1.85706e-06	0.0194565	6.06071e-07	0.00634983	2.28665e-06	0.0302566	7.4462e-07	0.00985269	1.36654e-06	0.0167299	4.47708e-07	0.00548107	3.21869e-07	0.00480559	1.05718e-07	0.0015784
13730	26	2.1284e-07	0.00317869	7.15502e-08	0.00106858	2.17378e-06	0.0272687	7.08301e-07	0.00888519	1.86423e-06	0.0194751	6.08412e-07	0.0063559	2.28534e-06	0.0302795	7.44194e-07	0.00986013	1.3663e-06	0.0167435	4.47631e-07	0.00548554	3.22782e-07	0.00480881	1.06018e-07	0.00157946
13740	26	2.1391e-07	0.00318083	7.19099e-08	0.00106929	2.16848e-06	0.0272904	7.06576e-07	0.00889226	1.86203e-06	0.0194937	6.07694e-07	0.00636197	2.28438e-06	0.0303023	7.43878e-07	0.00986757	1.37052e-06	0.0167572	4.49013e-07	0.00549003	3.12456e-07	0.00481196	1.02626e-07	0.00158049
13750	26	2.15649e-07	0.00318298	7.24945e-08	0.00107002	2.16418e-06	0.027312	7.05175e-07	0.00889933	1.85799e-06	0.0195123	6.06373e-07	0.00636805	2.28459e-06	0.0303252	7.43948e-07	0.00987501	1.37486e-06	0.0167709	4.50435e-07	0.00549452	3.02373e-07	0.00481507	9.93145e-08	0.00158151
13760	26	2.19888e-07	0.00318516	7.39195e-08	0.00107075	2.16887e-06	0.0273337	7.06703e-07	0.00890639	1.8547e-06	0.0195309	6.05302e-07	0.0063741	2.28761e-06	0.030348	7.44931e-07	0.00988246	1.3768e-06	0.0167847	4.51069e-07	0.00549903	3.02692e-07	0.00481809	9.94193e-08	0.0015825
13770	26	2.19939e-07	0.00318735	7.39364e-08	0.00107149	2.17306e-06	0.0273554	7.08069e-07	0.00891346	1.85325e-06	0.0195494	6.04828e-07	0.00638016	2.29573e-06	0.030371	7.47575e-07	0.00988992	1.3724e-06	0.0167984	4.49627e-07	0.00550353	3.00046e-07	0.0048211	9.85501e-08	0.00158349
13780	26	2.1544e-07	0.00318953	7.24242e-08	0.00107222	2.17672e-06	0.0273772	7.09261e-07	0.00892055	1.85327e-06	0.019568	6.04835e-07	0.00638621	2.30764e-06	0.030394	7.51454e-07	0.00989741	1.36345e-06	0.0168121	4.46696e-07	0.00550802	2.95422e-07	0.00482408	9.70315e-08	0.00158447
13790	26	2.03713e-07	0.00319161	6.8482e-08	0.00107292	2.17959e-06	0.0273989	7.10195e-07	0.00892765	1.85107e-06	0.0195865	6.04116e-07	0.00639225	2.31014e-06	0.0304171	7.52267e-07	0.00990493	1.36788e-06	0.0168258	4.48149e-07	0.0055125	2.98618e-07	0.00482706	9.80813e-08	0.00158545
13800	26	1.90974e-07	0.00319359	6.41995e-08	0.00107358	2.17761e-06	0.0274207	7.09551e-07	0.00893474	1.84958e-06	0.019605	6.0363e-07	0.00639829	2.3068e-06	0.0304401	7.51182e-07	0.00991244	1.36244e-06	0.0168394	4.46364e-07	0.00551696	3.01128e-07	0.00483006	9.89056e-08	0.00158643
13810	26	1.82021e-07	0.00319546	6.11896e-08	0.00107421	2.17274e-06	0.0274425	7.07962e-07	0.00894183	1.85222e-06	0.0196235	6.04492e-07	0.00640433	2.29884e-06	0.0304632	7.48589e-07	0.00991994	1.35076e-06	0.016853	4.42539e-07	0.00552141	3.06341e-07	0.0048331	1.00618e-07	0.00158743
13820	26	1.80966e-07	0.00319727	6.0835e-08	0.00107482	2.17108e-06	0.0274642	7.07424e-07	0.00894891	1.86065e-06	0.0196421	6.07242e-07	0.00641039	2.29465e-06	0.0304861	7.47223e-07	0.00992742	1.34808e-06	0.0168665	4.41661e-07	0.00552583	3.17493e-07	0.00483622	1.04281e-07	0.00158846
13830	26	1.82453e-07	0.00319909	6.13348e-08	0.00107543	2.17122e-06	0.0274859	7.07467e-07	0.00895598	1.86174e-06	0.0196607	6.07598e-07	0.00641646	2.29229e-06	0.0305091	7.46455e-07	0.00993489	1.34552e-06	0.01688	4.4082e-07	0.00553024	3.17298e-07	0.00483939	1.04217e-07	0.0015895
13840	26	1.79603e-07	0.0032009	6.03768e-08	0.00107604	2.17302e-06	0.0275076	7.08055e-07	0.00896306	1.85799e-06	0.0196793	6.06375e-07	0.00642253	2.29011e-06	0.030532	7.45746e-07	0.00994235	1.34996e-06	0.0168934	4.42276e-07	0.00553466	3.11877e-07	0.00484253	1.02436e-07	0.00159053
13850	26	1.78533e-07	0.00320269	6.00173e-08	0.00107664	2.17261e-06	0.0275294	7.07921e-07	0.00897014	1.8512e-06	0.0196978	6.04158e-07	0.00642858	2.29257e-06	0.0305549	7.46547e-07	0.00994982	1.35182e-06	0.0169069	4.42886e-07	0.00553908	2.9954e-07	0.00484557	9.83841e-08	0.00159153
13860	26	1.82278e-07	0.0032045	6.12762e-08	0.00107725	2.17062e-06	0.0275511	7.07274e-07	0.00897721	1.85037e-06	0.0197163	6.03887e-07	0.00643463	2.29495e-06	0.0305778	7.47321e-07	0.00995729	1.34897e-06	0.0169205	4.41953e-07	0.00554351	2.88146e-07	0.00484852	9.46417e-08	0.0015925
13870	26	1.87084e-07	0.00320634	6.28918e-08	0.00107787	2.16949e-06	0.0275728	7.06903e-07	0.00898429	1.85209e-06	0.0197348	6.04447e-07	0.00644066	2.29028e-06	0.0306008	7.45799e-07	0.00996475	1.35695e-06	0.016934	4.44566e-07	0.00554794	2.85376e-07	0.00485139	9.37317e-08	0.00159344
13880	26	1.83617e-07	0.00320819	6.17263e-08	0.00107849	2.17514e-06	0.0275945	7.08746e-07	0.00899136	1.84162e-06	0.0197533	6.01031e-07	0.00644669	2.29552e-06	0.0306237	7.47506e-07	0.00997222	1.3606e-06	0.0169476	4.45763e-07	0.0055524	2.85048e-07	0.00485424	9.36241e-08	0.00159438
13890	26	1.79057e-07	0.00321001	6.01935e-08	0.0010791	2.17456e-06	0.0276162	7.08555e-07	0.00899845	1.83283e-06	0.0197717	5.98163e-07	0.00645269	2.29622e-06	0.0306466	7.47736e-07	0.00997969	1.36257e-06	0.0169612	4.46409e-07	0.00555686	2.91305e-07	0.00485715	9.56793e-08	0.00159533
13900	26	1.7778e-07	0.00321179	5.97639e-08	0.0010797	2.17998e-06	0.027638	7.10323e-07	0.00900555	1.82841e-06	0.01979	5.9672e-07	0.00645866	2.29441e-06	0.0306696	7.47146e-07	0.00998717	1.3643e-06	0.0169748	4.46974e-07	0.00556132	3.00367e-07	0.00486009	9.86558e-08	0.0015963
13910	26	1.81335e-07	0.0032136	6.09592e-08	0.00108031	2.18664e-06	0.0276598	7.12493e-07	0.00901266	1.82782e-06	0.0198083	5.96526e-07	0.00646463	2.29157e-06	0.0306925	7.4622e-07	0.00999464	1.36596e-06	0.0169885	4.47519e-07	0.0055658	3.07496e-07	0.00486313	1.00997e-07	0.0015973
13920	26	1.87556e-07	0.00321544	6.30504e-08	0.00108093	2.18739e-06	0.0276817	7.12737e-07	0.00901978	1.83769e-06	0.0198266	5.99747e-07	0.00647062	2.29375e-06	0.0307155	7.46932e-07	0.0100021	1.36726e-06	0.0170021	4.47945e-07	0.00557027	3.08392e-07	0.0048662	1.01291e-07	0.0015983
13930	26	1.95709e-07	0.00321737	6.5791e-08	0.00108158	2.18796e-06	0.0277036	7.12923e-07	0.00902691	1.84594e-06	0.019845	6.02441e-07	0.00647663	2.29453e-06	0.0307384	7.47184e-07	0.0100096	1.36713e-06	0.0170158	4.479e-07	0.00557475	3.04619e-07	0.00486927	1.00052e-07	0.00159931
13940	26	2.02178e-07	0.00321934	6.79658e-08	0.00108224	2.18649e-06	0.0277255	7.12445e-07	0.00903404	1.85185e-06	0.0198635	6.04369e-07	0.00648266	2.29449e-06	0.0307613	7.47173e-07	0.010017	1.36682e-06	0.0170295	4.47801e-07	0.00557923	2.99735e-07	0.00487228	9.8448e-08	0.0016003
13950	26	2.03582e-07	0.00322137	6.84379e-08	0.00108292	2.18059e-06	0.0277473	7.1052e-07	0.00904115	1.85592e-06	0.0198821	6.05699e-07	0.00648871	2.29686e-06	0.0307843	7.47942e-07	0.0100245	1.36697e-06	0.0170432	4.47849e-07	0.00558371	2.92703e-07	0.00487525	9.61386e-08	0.00160128
13960	26	2.01733e-07	0.00322339	6.78163e-08	0.0010836	2.17133e-06	0.027769	7.07503e-07	0.00904824	1.85876e-06	0.0199006	6.06626e-07	0.00649477	2.29774e-06	0.0308073	7.48231e-07	0.010032	1.36873e-06	0.0170568	4.48426e-07	0.00558819	2.83622e-07	0.00487814	9.31557e-08	0.00160223
13970	26	1.97419e-07	0.00322539	6.63659e-08	0.00108427	2.15945e-06	0.0277907	7.03633e-07	0.0090553	1.8559e-06	0.0199192	6.0569e-07	0.00650083	2.29707e-06	0.0308302	7.48012e-07	0.0100395	1.3719e-06	0.0170705	4.49465e-07	0.00559268	2.86688e-07	0.004881	9.41629e-08	0.00160317
13980	26	1.91456e-07	0.00322732	6.43615e-08	0.00108492	2.15861e-06	0.0278123	7.03359e-07	0.00906234	1.84484e-06	0.0199377	6.02081e-07	0.00650687	2.29585e-06	0.0308532	7.47614e-07	0.010047	1.36784e-06	0.0170842	4.48134e-07	0.00559716	2.8977e-07	0.00488389	9.51751e-08	0.00160411
13990	26	1.85265e-07	0.00322922	6.22801e-08	0.00108556	2.16056e-06	0.0278339	7.03994e-07	0.00906937	1.82419e-06	0.019956	5.95341e-07	0.00651285	2.29568e-06	0.0308762	7.47561e-07	0.0100544	1.36459e-06	0.0170979	4.4707e-07	0.00560164	2.91264e-07	0.00488678	9.56658e-08	0.00160507
14000	26	1.80328e-07	0.00323105	6.06206e-08	0.00108618	2.16e-06	0.0278555	7.03813e-07	0.00907641	1.81955e-06	0.0199743	5.93827e-07	0.0065188	2.30126e-06	0.0308992	7.49377e-07	0.0100619	1.3754e-06	0.0171116	4.50611e-07	0.00560613	2.85299e-07	0.00488966	9.37065e-08	0.00160601
14010	26	1.79224e-07	0.00323285	6.02493e-08	0.00108678	2.15472e-06	0.0278771	7.02093e-07	0.00908344	1.82104e-06	0.0199925	5.94314e-07	0.00652475	2.29364e-06	0.0309221	7.46894e-07	0.0100694	1.3759e-06	0.0171254	4.50773e-07	0.00561064	2.85398e-07	0.00489252	9.37391e-08	0.00160695
14020	26	1.75666e-07	0.00323461	5.90532e-08	0.00108737	2.15125e-06	0.0278986	7.00961e-07	0.00909046	1.82053e-06	0.0200107	5.94149e-07	0.00653069	2.28659e-06	0.030945	7.44598e-07	0.0100769	1.37518e-06	0.0171391	4.50539e-07	0.00561515	2.86477e-07	0.00489538	9.40934e-08	0.00160789
14030	26	1.68459e-07	0.00323633	5.66305e-08	0.00108795	2.151e-06	0.0279201	7.00878e-07	0.00909746	1.81837e-06	0.0200289	5.93442e-07	0.00653662	2.28386e-06	0.0309679	7.43711e-07	0.0100843	1.3761e-06	0.0171529	4.50839e-07	0.00561965	2.86875e-07	0.00489825	9.42242e-08	0.00160883
14040	26	1.63562e-07	0.003238	5.49844e-08	0.00108851	2.15528e-06	0.0279417	7.02275e-07	0.00910448	1.81663e-06	0.020047	5.92875e-07	0.00654256	2.28099e-06	0.0309907	7.42775e-07	0.0100917	1.37348e-06	0.0171666	4.49983e-07	0.00562415	2.85792e-07	0.00490111	9.38684e-08	0.00160977
14050	26	1.59861e-07	0.00323962	5.37402e-08	0.00108906	2.16105e-06	0.0279632	7.04154e-07	0.00911151	1.81541e-06	0.0200652	5.92477e-07	0.00654848	2.27796e-06	0.0310135	7.41791e-07	0.0100992	1.36935e-06	0.0171803	4.48629e-07	0.00562865	2.8373e-07	0.00490396	9.31914e-08	0.00161071
14060	26	1.56467e-07	0.0032412	5.25991e-08	0.00108959	2.1524e-06	0.0279848	7.01336e-07	0.00911853	1.81938e-06	0.0200834	5.93772e-07	0.00655442	2.27373e-06	0.0310363	7.40411e-07	0.0101066	1.3701e-06	0.017194	4.48874e-07	0.00563314	2.77837e-07	0.00490676	9.12558e-08	0.00161163
14070	26	1.54939e-07	0.00324276	5.20857e-08	0.00109011	2.14635e-06	0.0280063	6.99363e-07	0.00912554	1.82659e-06	0.0201016	5.96127e-07	0.00656037	2.26516e-06	0.0310589	7.3762e-07	0.010114	1.36705e-06	0.0172077	4.47876e-07	0.00563762	2.72832e-07	0.00490951	8.96119e-08	0.00161253
14080	26	1.52633e-07	0.00324429	5.13105e-08	0.00109063	2.14134e-06	0.0280277	6.97731e-07	0.00913252	1.83078e-06	0.0201199	5.97493e-07	0.00656633	2.25496e-06	0.0310815	7.34298e-07	0.0101213	1.36261e-06	0.0172214	4.46421e-07	0.00564209	2.65494e-07	0.0049122	8.72015e-08	0.00161341
14090	26	1.45328e-07	0.00324578	4.88547e-08	0.00109113	2.13667e-06	0.0280491	6.96209e-07	0.00913949	1.82105e-06	0.0201381	5.94318e-07	0.00657229	2.24571e-06	0.031104	7.31287e-07	0.0101286	1.35908e-06	0.017235	4.45266e-07	0.00564655	2.49687e-07	0.00491476	8.20099e-08	0.00161425
14100	26	1.39353e-07	0.0032472	4.68461e-08	0.0010916	2.13501e-06	0.0280705	6.95669e-07	0.00914645	1.81404e-06	0.0201563	5.92031e-07	0.00657822	2.24082e-06	0.0311265	7.29694e-07	0.0101359	1.35765e-06	0.0172486	4.44797e-07	0.005651	2.39248e-07	0.00491721	7.8581e-08	0.00161506
14110	26	1.34233e-07	0.00324857	4.51249e-08	0.00109207	2.13817e-06	0.0280918	6.96699e-07	0.00915341	1.80879e-06	0.0201744	5.90316e-07	0.00658413	2.23872e-06	0.0311489	7.29012e-07	0.0101432	1.35757e-06	0.0172621	4.44769e-07	0.00565545	2.32256e-07	0.00491958	7.62847e-08	0.00161584
14120	26	1.34496e-07	0.00324993	4.52134e-08	0.00109252	2.1329e-06	0.0281132	6.94983e-07	0.00916037	1.79971e-06	0.0201925	5.87352e-07	0.00659002	2.23303e-06	0.0311712	7.27157e-07	0.0101505	1.35609e-06	0.0172757	4.44286e-07	0.00565989	2.36407e-07	0.00492194	7.76481e-08	0.00161661
14130	26	1.35466e-07	0.00325127	4.55394e-08	0.00109297	2.12708e-06	0.0281345	6.93087e-07	0.00916731	1.79472e-06	0.0202105	5.85726e-07	0.00659589	2.22815e-06	0.0311935	7.25568e-07	0.0101578	1.35129e-06	0.0172892	4.42712e-07	0.00566433	2.42869e-07	0.00492433	7.97703e-08	0.0016174
14140	26	1.34424e-07	0.00325262	4.5189e-08	0.00109343	2.12568e-06	0.0281557	6.92629e-07	0.00917424	1.80064e-06	0.0202284	5.87658e-07	0.00660176	2.22745e-06	0.0312158	7.25343e-07	0.010165	1.34094e-06	0.0173027	4.3932e-07	0.00566874	2.46423e-07	0.00492677	8.09378e-08	0.0016182
14150	26	1.33388e-07	0.00325396	4.48408e-08	0.00109388	2.12201e-06	0.028177	6.91433e-07	0.00918116	1.80188e-06	0.0202465	5.88061e-07	0.00660763	2.22628e-06	0.0312381	7.24959e-07	0.0101723	1.33562e-06	0.0173161	4.37579e-07	0.00567312	2.46842e-07	0.00492924	8.10755e-08	0.00161901
14160	26	1.36998e-07	0.00325532	4.60545e-08	0.00109433	2.12188e-06	0.0281982	6.91392e-07	0.00918808	1.80446e-06	0.0202645	5.88904e-07	0.00661352	2.22601e-06	0.0312604	7.24874e-07	0.0101795	1.32962e-06	0.0173294	4.35613e-07	0.00567749	2.4276e-07	0.00493168	7.97347e-08	0.00161981
14170	26	1.42981e-07	0.00325672	4.80657e-08	0.00109481	2.12491e-06	0.0282194	6.92379e-07	0.009195	1.80554e-06	0.0202825	5.89256e-07	0.00661941	2.22325e-06	0.0312826	7.23972e-07	0.0101868	1.32443e-06	0.0173427	4.33912e-07	0.00568184	2.40961e-07	0.00493411	7.91438e-08	0.00162061
14180	26	1.49361e-07	0.00325817	5.02104e-08	0.0010953	2.12907e-06	0.0282407	6.93735e-07	0.00920192	1.80355e-06	0.0203006	5.88608e-07	0.0066253	2.21738e-06	0.0313048	7.22061e-07	0.010194	1.32128e-06	0.0173559	4.3288e-07	0.00568617	2.42679e-07	0.00493652	7.97081e-08	0.0016214
14190	26	1.52028e-07	0.00325969	5.1107e-08	0.0010958	2.12589e-06	0.028262	6.92698e-07	0.00920885	1.79442e-06	0.0203185	5.85627e-07	0.00663116	2.21013e-06	0.0313269	7.197e-07	0.0102012	1.32445e-06	0.0173691	4.33919e-07	0.00569051	2.40352e-07	0.00493893	7.89436e-08	0.00162219
14200	26	1.53466e-07	0.00326121	5.15903e-08	0.00109631	2.1224e-06	0.0282832	6.91562e-07	0.00921578	1.78357e-06	0.0203365	5.82085e-07	0.00663701	2.20125e-06	0.031349	7.16809e-07	0.0102084	1.32548e-06	0.0173824	4.34255e-07	0.00569485	2.37865e-07	0.00494133	7.81268e-08	0.00162298
14210	26	1.52312e-07	0.00326274	5.12024e-08	0.00109683	2.11994e-06	0.0283044	6.90758e-07	0.00922269	1.76972e-06	0.0203542	5.77565e-07	0.00664281	2.1882e-06	0.031371	7.12559e-07	0.0102156	1.31855e-06	0.0173956	4.31987e-07	0.00569918	2.36012e-07	0.0049437	7.75183e-08	0.00162376
14220	26	1.50002e-07	0.00326425	5.04259e-08	0.00109734	2.11057e-06	0.0283256	6.87708e-07	0.00922958	1.76468e-06	0.0203719	5.75922e-07	0.00664858	2.19986e-06	0.0313929	7.16358e-07	0.0102227	1.31326e-06	0.0174088	4.30253e-07	0.00570349	2.34879e-07	0.00494605	7.7146e-08	0.00162453
14230	26	1.55636e-07	0.00326578	5.23199e-08	0.00109785	2.10546e-06	0.0283467	6.86042e-07	0.00923645	1.76289e-06	0.0203895	5.75337e-07	0.00665433	2.20043e-06	0.0314149	7.16543e-07	0.0102299	1.30339e-06	0.0174218	4.27018e-07	0.00570777	2.42838e-07	0.00494845	7.97602e-08	0.00162532
14240	26	1.57635e-07	0.00326734	5.29918e-08	0.00109838	2.09462e-06	0.0283677	6.82511e-07	0.00924329	1.76009e-06	0.0204072	5.74423e-07	0.00666008	2.2049e-06	0.0314369	7.17999e-07	0.010237	1.29522e-06	0.0174348	4.24341e-07	0.00571203	2.45886e-07	0.00495089	8.07614e-08	0.00162612
14250	26	1.57998e-07	0.00326893	5.31138e-08	0.00109891	2.0816e-06	0.0283885	6.78266e-07	0.00925009	1.76135e-06	0.0204248	5.74835e-07	0.00666583	2.21298e-06	0.031459	7.20628e-07	0.0102442	1.29007e-06	0.0174478	4.22655e-07	0.00571626	2.41693e-07	0.00495332	7.93842e-08	0.00162692
14260	26	1.62802e-07	0.00327053	5.47288e-08	0.00109945	2.07439e-06	0.0284093	6.75916e-07	0.00925686	1.76739e-06	0.0204424	5.76805e-07	0.00667159	2.2157e-06	0.0314812	7.21514e-07	0.0102514	1.2874e-06	0.0174606	4.21782e-07	0.00572049	2.37174e-07	0.00495572	7.78997e-08	0.00162771
14270	26	1.6751e-07	0.00327218	5.63115e-08	0.0011	2.06989e-06	0.02843	6.7445e-07	0.00926362	1.76293e-06	0.0204601	5.7535e-07	0.00667735	2.20911e-06	0.0315033	7.1937e-07	0.0102587	1.28274e-06	0.0174735	4.20252e-07	0.0057247	2.34712e-07	0.00495808	7.70914e-08	0.00162848
14280	26	1.66971e-07	0.00327385	5.61305e-08	0.00110056	2.06595e-06	0.0284507	6.73168e-07	0.00927035	1.75798e-06	0.0204777	5.73733e-07	0.00668309	2.20191e-06	0.0315253	7.17025e-07	0.0102658	1.26716e-06	0.0174862	4.15149e-07	0.00572887	2.29909e-07	0.00496039	7.55137e-08	0.00162924
14290	26	1.64591e-07	0.00327551	5.53304e-08	0.00110112	2.06236e-06	0.0284714	6.71998e-07	0.00927708	1.75205e-06	0.0204952	5.71801e-07	0.00668882	2.198e-06	0.0315474	7.1575e-07	0.010273	1.2603e-06	0.0174989	4.12902e-07	0.00573301	2.24407e-07	0.00496268	7.37065e-08	0.00162999
14300	26	1.67833e-07	0.00327718	5.64202e-08	0.00110168	2.06129e-06	0.028492	6.71648e-07	0.0092838	1.7357e-06	0.0205127	5.66465e-07	0.00669451	2.2007e-06	0.0315694	7.16631e-07	0.0102802	1.25677e-06	0.0175115	4.11746e-07	0.00573714	2.23059e-07	0.00496491	7.32637e-08	0.00163073
14310	26	1.69096e-07	0.00327886	5.68449e-08	0.00110225	2.06253e-06	0.0285126	6.72053e-07	0.00929052	1.723e-06	0.0205299	5.62318e-07	0.00670016	2.20219e-06	0.0315914	7.17114e-07	0.0102873	1.25281e-06	0.017524	4.10447e-07	0.00574125	2.18646e-07	0.00496712	7.18144e-08	0.00163145
14320	26	1.67313e-07	0.00328054	5.62454e-08	0.00110281	2.05841e-06	0.0285332	6.7071e-07	0.00929723	1.7182e-06	0.0205472	5.60752e-07	0.00670577	2.20175e-06	0.0316134	7.16973e-07	0.0102945	1.25799e-06	0.0175366	4.12146e-07	0.00574536	2.17173e-07	0.0049693	7.13306e-08	0.00163217
14330	26	1.6763e-07	0.00328222	5.6352e-08	0.00110338	2.05638e-06	0.0285538	6.7005e-07	0.00930394	1.71591e-06	0.0205643	5.60006e-07	0.00671137	2.20066e-06	0.0316354	7.16616e-07	0.0103017	1.26786e-06	0.0175492	4.15379e-07	0.0057495	2.12099e-07	0.00497144	6.96641e-08	0.00163287
14340	26	1.67076e-07	0.00328389	5.61658e-08	0.00110394	2.05907e-06	0.0285744	6.70924e-07	0.00931064	1.71736e-06	0.0205815	5.60478e-07	0.00671698	2.19863e-06	0.0316574	7.15958e-07	0.0103088	1.28055e-06	0.0175619	4.19535e-07	0.00575367	2.01082e-07	0.00497351	6.60456e-08	0.00163355
14350	26	1.5997e-07	0.00328552	5.37768e-08	0.00110449	2.06371e-06	0.028595	6.72438e-07	0.00931736	1.72723e-06	0.0205987	5.63699e-07	0.0067226	2.19579e-06	0.0316794	7.15033e-07	0.010316	1.28676e-06	0.0175748	4.2157e-07	0.00575788	1.86928e-07	0.00497546	6.13964e-08	0.00163419
14360	26	1.48706e-07	0.00328706	4.99904e-08	0.001105	2.0621e-06	0.0286156	6.71914e-07	0.00932408	1.72425e-06	0.020616	5.62727e-07	0.00672823	2.19288e-06	0.0317013	7.14084e-07	0.0103231	1.28197e-06	0.0175876	4.20001e-07	0.00576208	1.85333e-07	0.00497732	6.08726e-08	0.0016348
14370	26	1.41902e-07	0.00328852	4.77031e-08	0.0011055	2.06504e-06	0.0286362	6.7287e-07	0.0093308	1.71737e-06	0.0206332	5.6048e-07	0.00673384	2.1913e-06	0.0317232	7.13571e-07	0.0103303	1.27376e-06	0.0176004	4.17311e-07	0.00576627	1.84975e-07	0.00497917	6.07551e-08	0.00163541
14380	26	1.42773e-07	0.00328995	4.79958e-08	0.00110598	2.06925e-06	0.0286569	6.74243e-07	0.00933754	1.71123e-06	0.0206503	5.58476e-07	0.00673944	2.18959e-06	0.0317451	7.13013e-07	0.0103374	1.26759e-06	0.0176131	4.15291e-07	0.00577043	1.84503e-07	0.00498102	6.06001e-08	0.00163602
14390	26	1.53979e-07	0.00329144	5.17627e-08	0.00110648	2.06396e-06	0.0286776	6.72519e-07	0.00934427	1.71078e-06	0.0206674	5.5833e-07	0.00674502	2.18436e-06	0.031767	7.1131e-07	0.0103445	1.27104e-06	0.0176258	4.1642e-07	0.00577459	1.86143e-07	0.00498288	6.11386e-08	0.00163663
14400	26	1.5607e-07	0.00329297	5.24659e-08	0.00110699	2.0627e-06	0.0286982	6.72109e-07	0.00935099	1.71118e-06	0.0206845	5.5846e-07	0.00675061	2.17342e-06	0.0317888	7.07748e-07	0.0103516	1.27273e-06	0.0176385	4.16975e-07	0.00577876	1.87924e-07	0.00498475	6.17239e-08	0.00163724
14410	26	1.53792e-07	0.00329452	5.17e-08	0.00110751	2.06164e-06	0.0287188	6.71762e-07	0.00935771	1.7119e-06	0.0207017	5.58696e-07	0.00675619	2.16137e-06	0.0318105	7.03824e-07	0.0103587	1.27395e-06	0.0176512	4.17375e-07	0.00578293	1.87678e-07	0.00498662	6.16429e-08	0.00163786
14420	26	1.48184e-07	0.00329603	4.98147e-08	0.00110802	2.05406e-06	0.0287394	6.69292e-07	0.00936442	1.71258e-06	0.0207188	5.58919e-07	0.00676178	2.1547e-06	0.031832	7.01652e-07	0.0103657	1.27622e-06	0.017664	4.18119e-07	0.00578711	1.77851e-07	0.00498845	5.84153e-08	0.00163846
14430	26	1.44689e-07	0.0032975	4.86399e-08	0.00110852	2.04691e-06	0.0287599	6.66962e-07	0.0093711	1.71266e-06	0.0207359	5.58944e-07	0.00676737	2.15172e-06	0.0318536	7.0068e-07	0.0103727	1.2788e-06	0.0176768	4.18962e-07	0.00579129	1.69625e-07	0.00499018	5.57134e-08	0.00163903
14440	26	1.43935e-07	0.00329895	4.83865e-08	0.001109	2.04444e-06	0.0287804	6.66157e-07	0.00937777	1.71012e-06	0.020753	5.58115e-07	0.00677295	2.15185e-06	0.0318751	7.00723e-07	0.0103797	1.28044e-06	0.0176896	4.19499e-07	0.00579549	1.65511e-07	0.00499187	5.43621e-08	0.00163958
14450	26	1.46834e-07	0.0033004	4.93611e-08	0.00110949	2.05304e-06	0.0288009	6.68959e-07	0.00938445	1.70086e-06	0.0207701	5.55092e-07	0.00677852	2.15682e-06	0.0318966	7.02343e-07	0.0103867	1.27916e-06	0.0177024	4.1908e-07	0.00579968	1.68014e-07	0.00499354	5.51843e-08	0.00164013
14460	26	1.52219e-07	0.0033019	5.1171e-08	0.00110999	2.06196e-06	0.0288214	6.71868e-07	0.00939115	1.70117e-06	0.0207871	5.55193e-07	0.00678408	2.16146e-06	0.0319182	7.03852e-07	0.0103938	1.27294e-06	0.0177151	4.17043e-07	0.00580386	1.69521e-07	0.00499522	5.56791e-08	0.00164068
14470	26	1.57645e-07	0.00330345	5.29954e-08	0.00111052	2.06667e-06	0.0288421	6.73403e-07	0.00939787	1.7028e-06	0.0208041	5.55725e-07	0.00678963	2.16799e-06	0.0319399	7.05978e-07	0.0104008	1.27426e-06	0.0177279	4.17477e-07	0.00580804	1.69287e-07	0.00499692	5.56023e-08	0.00164124
14480	26	1.61612e-07	0.00330505	5.43287e-08	0.00111105	2.06641e-06	0.0288627	6.73317e-07	0.00940461	1.70001e-06	0.0208211	5.54814e-07	0.00679518	2.17692e-06	0.0319616	7.08887e-07	0.0104079	1.28724e-06	0.0177407	4.21729e-07	0.00581223	1.67711e-07	0.0049986	5.50848e-08	0.00164179
14490	26	1.64549e-07	0.00330668	5.53162e-08	0.0011116	2.07015e-06	0.0288834	6.74535e-07	0.00941135	1.6999e-06	0.0208381	5.54781e-07	0.00680073	2.17579e-06	0.0319834	7.08518e-07	0.010415	1.28947e-06	0.0177535	4.22457e-07	0.00581645	1.6582e-07	0.00500026	5.44636e-08	0.00164234
14500	26	1.67109e-07	0.00330833	5.61766e-08	0.00111216	2.07536e-06	0.0289041	6.76232e-07	0.0094181	1.70079e-06	0.0208551	5.5507e-07	0.00680628	2.17096e-06	0.0320051	7.06946e-07	0.0104221	1.28774e-06	0.0177664	4.21891e-07	0.00582067	1.63813e-07	0.00500192	5.38043e-08	0.00164288
14510	26	1.58708e-07	0.00330996	5.33527e-08	0.0011127	2.06727e-06	0.0289248	6.73596e-07	0.00942484	1.68756e-06	0.0208721	5.50753e-07	0.00681181	2.16564e-06	0.0320268	7.05213e-07	0.0104291	1.29078e-06	0.0177793	4.22888e-07	0.00582489	1.70641e-07	0.00500359	5.60471e-08	0.00164343
14520	26	1.70119e-07	0.00331164	5.71886e-08	0.00111327	2.06206e-06	0.0289455	6.71898e-07	0.00943157	1.6963e-06	0.020889	5.53606e-07	0.00681734	2.14869e-06	0.0320483	6.99694e-07	0.0104361	1.29108e-06	0.0177922	4.22986e-07	0.00582912	1.75843e-07	0.00500534	5.77556e-08	0.001644
14530	26	1.82189e-07	0.00331339	6.12462e-08	0.00111386	2.06158e-06	0.0289661	6.71743e-07	0.00943829	1.7019e-06	0.020906	5.55431e-07	0.00682288	2.13189e-06	0.0320697	6.94223e-07	0.0104431	1.29239e-06	0.0178051	4.23415e-07	0.00583335	1.8428e-07	0.00500714	6.05267e-08	0.0016446
14540	26	1.92739e-07	0.00331524	6.47929e-08	0.00111448	2.06154e-06	0.0289867	6.71729e-07	0.00944501	1.7038e-06	0.020923	5.56052e-07	0.00682844	2.11552e-06	0.032091	6.88894e-07	0.01045	1.29459e-06	0.0178181	4.24135e-07	0.00583759	1.94784e-07	0.00500901	6.3977e-08	0.00164521
14550	26	1.79798e-07	0.0033171	6.04424e-08	0.0011151	2.05507e-06	0.0290073	6.69622e-07	0.00945171	1.71138e-06	0.0209401	5.58526e-07	0.00683401	2.10148e-06	0.0321121	6.84321e-07	0.0104569	1.29206e-06	0.017831	4.23309e-07	0.00584183	1.82727e-07	0.0050109	6.00169e-08	0.00164583
14560	26	1.61571e-07	0.0033188	5.43151e-08	0.00111568	2.04973e-06	0.0290278	6.67881e-07	0.0094584	1.71594e-06	0.0209572	5.60014e-07	0.0068396	2.09097e-06	0.032133	6.80897e-07	0.0104637	1.28985e-06	0.0178439	4.22583e-07	0.00584606	1.78364e-07	0.0050127	5.85837e-08	0.00164642
14570	26	1.50215e-07	0.00332036	5.04974e-08	0.0011162	2.04798e-06	0.0290483	6.67311e-07	0.00946508	1.70926e-06	0.0209743	5.57835e-07	0.00684519	2.08555e-06	0.0321539	6.79132e-07	0.0104705	1.28634e-06	0.0178568	4.21434e-07	0.00585028	1.77509e-07	0.00501448	5.83029e-08	0.00164701
14580	26	1.46172e-07	0.00332184	4.91383e-08	0.0011167	2.04786e-06	0.0290688	6.67274e-07	0.00947175	1.70517e-06	0.0209914	5.565e-07	0.00685077	2.0866e-06	0.0321748	6.79476e-07	0.0104773	1.28014e-06	0.0178696	4.19403e-07	0.00585448	1.75352e-07	0.00501624	5.75945e-08	0.00164759
14590	26	1.47566e-07	0.00332331	4.9607e-08	0.00111719	2.0489e-06	0.0290893	6.67613e-07	0.00947843	1.71227e-06	0.0210085	5.58817e-07	0.00685634	2.09476e-06	0.0321957	6.82132e-07	0.0104841	1.27055e-06	0.0178824	4.16261e-07	0.00585866	1.69487e-07	0.00501797	5.56679e-08	0.00164816
14600	26	1.47866e-07	0.00332479	4.9708e-08	0.00111769	2.05134e-06	0.0291098	6.68407e-07	0.00948511	1.70751e-06	0.0210256	5.57264e-07	0.00686192	2.10681e-06	0.0322167	6.86055e-07	0.010491	1.25807e-06	0.017895	4.12172e-07	0.0058628	1.61036e-07	0.00501961	5.28924e-08	0.00164869
14610	26	1.42462e-07	0.00332623	4.78913e-08	0.00111817	2.0462e-06	0.0291303	6.66733e-07	0.00949178	1.70865e-06	0.0210427	5.57636e-07	0.00686749	2.10802e-06	0.0322378	6.8645e-07	0.0104978	1.25485e-06	0.0179076	4.11116e-07	0.00586692	1.60568e-07	0.00502124	5.27387e-08	0.00164923
14620	26	1.34812e-07	0.00332762	4.53196e-08	0.00111864	2.04299e-06	0.0291507	6.65687e-07	0.00949845	1.7084e-06	0.0210598	5.57552e-07	0.00687307	2.10709e-06	0.0322588	6.86146e-07	0.0105047	1.25233e-06	0.0179201	4.10292e-07	0.00587102	1.66599e-07	0.00502286	5.47194e-08	0.00164976
14630	26	1.23602e-07	0.00332892	4.1551e-08	0.00111908	2.04263e-06	0.0291712	6.65568e-07	0.0095051	1.70644e-06	0.0210768	5.56915e-07	0.00687864	2.1066e-06	0.0322799	6.85988e-07	0.0105115	1.25228e-06	0.0179327	4.10274e-07	0.00587513	1.68172e-07	0.00502454	5.52363e-08	0.00165031
14640	26	1.04596e-07	0.00333006	3.51617e-08	0.00111946	2.03611e-06	0.0291915	6.63444e-07	0.00951174	1.70928e-06	0.0210939	5.57839e-07	0.00688421	2.10406e-06	0.032301	6.85161e-07	0.0105184	1.26617e-06	0.0179452	4.14824e-07	0.00587925	1.67166e-07	0.00502621	5.49058e-08	0.00165086
14650	26	1.00582e-07	0.00333109	3.38126e-08	0.00111981	2.01931e-06	0.0292118	6.5797e-07	0.00951835	1.70339e-06	0.021111	5.55919e-07	0.00688978	2.11213e-06	0.0323221	6.87789e-07	0.0105253	1.26651e-06	0.0179579	4.14935e-07	0.0058834	1.62934e-07	0.00502786	5.35157e-08	0.0016514
14660	26	8.74213e-08	0.00333201	2.93883e-08	0.00112012	2.01218e-06	0.029232	6.55646e-07	0.00952492	1.70601e-06	0.021128	5.56774e-07	0.00689535	2.11851e-06	0.0323432	6.89867e-07	0.0105322	1.25876e-06	0.0179705	4.12399e-07	0.00588753	1.5292e-07	0.00502944	5.02267e-08	0.00165192
14670	26	7.53595e-08	0.00333284	2.53335e-08	0.0011204	2.01401e-06	0.0292521	6.56242e-07	0.00953148	1.70725e-06	0.0211451	5.57177e-07	0.00690092	2.12545e-06	0.0323644	6.92127e-07	0.0105391	1.25078e-06	0.0179831	4.09783e-07	0.00589165	1.51762e-07	0.00503097	4.98464e-08	0.00165243
14680	26	7.59755e-08	0.0033336	2.55406e-08	0.00112065	2.02325e-06	0.0292723	6.59254e-07	0.00953806	1.69851e-06	0.0211621	5.54325e-07	0.00690648	2.13891e-06	0.0323858	6.96511e-07	0.010546	1.25187e-06	0.0179956	4.10141e-07	0.00589575	1.53585e-07	0.0050325	5.04449e-08	0.00165292
14690	26	8.1767e-08	0.00333439	2.74875e-08	0.00112092	2.02275e-06	0.0292925	6.5909e-07	0.00954465	1.70038e-06	0.0211791	5.54935e-07	0.00691202	2.14569e-06	0.0324072	6.98718e-07	0.010553	1.25858e-06	0.0180081	4.12339e-07	0.00589986	1.53085e-07	0.00503403	5.02807e-08	0.00165343
14700	26	8.94902e-08	0.00333525	3.00838e-08	0.00112121	2.01768e-06	0.0293127	6.5744e-07	0.00955123	1.70327e-06	0.0211962	5.55881e-07	0.00691758	2.14579e-06	0.0324286	6.9875e-07	0.01056	1.25511e-06	0.0180207	4.112e-07	0.00590398	1.48015e-07	0.00503553	4.86157e-08	0.00165392
14710	26	8.43231e-08	0.00333609	2.83467e-08	0.00112149	2.0192e-06	0.0293329	6.57934e-07	0.00955781	1.70561e-06	0.0212132	5.56645e-07	0.00692314	2.13972e-06	0.0324501	6.96774e-07	0.010567	1.25295e-06	0.0180333	4.10493e-07	0.00590809	1.52919e-07	0.00503706	5.02262e-08	0.00165442
14720	26	7.52993e-08	0.00333691	2.53132e-08	0.00112176	2.02241e-06	0.0293531	6.58981e-07	0.00956439	1.70363e-06	0.0212302	5.55996e-07	0.0069287	2.14956e-06	0.0324715	6.99977e-07	0.0105739	1.25274e-06	0.0180458	4.10426e-07	0.00591219	1.60898e-07	0.00503861	5.28469e-08	0.00165493
14730	26	7.0191e-08	0.00333764	2.3596e-08	0.00112201	2.02256e-06	0.0293733	6.59029e-07	0.00957098	1.70036e-06	0.0212472	5.5493e-07	0.00693425	2.16056e-06	0.0324931	7.03558e-07	0.010581	1.25793e-06	0.0180583	4.12124e-07	0.00591631	1.65732e-07	0.00504025	5.44346e-08	0.00165547
14740	26	7.43731e-08	0.00333839	2.50019e-08	0.00112226	2.02872e-06	0.0293936	6.61035e-07	0.00957759	1.69783e-06	0.0212642	5.54103e-07	0.0069398	2.17002e-06	0.0325147	7.0664e-07	0.010588	1.25864e-06	0.0180709	4.12357e-07	0.00592043	1.61716e-07	0.00504186	5.31158e-08	0.001656
14750	26	8.51513e-08	0.00333917	2.86252e-08	0.00112252	2.03956e-06	0.029414	6.64569e-07	0.00958421	1.69842e-06	0.0212812	5.54297e-07	0.00694534	2.17648e-06	0.0325365	7.08743e-07	0.0105951	1.25571e-06	0.0180835	4.11398e-07	0.00592455	1.52589e-07	0.00504344	5.01178e-08	0.00165652
14760	26	9.42078e-08	0.00334008	3.16697e-08	0.00112283	2.04864e-06	0.0294344	6.67526e-07	0.00959088	1.70899e-06	0.0212983	5.57747e-07	0.0069509	2.17812e-06	0.0325582	7.09278e-07	0.0106022	1.25522e-06	0.0180961	4.11236e-07	0.00592866	1.56212e-07	0.00504502	5.13077e-08	0.00165704
14770	26	1.00984e-07	0.00334103	3.39477e-08	0.00112315	2.0565e-06	0.0294549	6.70088e-07	0.00959756	1.7124e-06	0.0213154	5.5886e-07	0.00695649	2.17061e-06	0.03258	7.06833e-07	0.0106093	1.25651e-06	0.0181086	4.1166e-07	0.00593278	1.65178e-07	0.00504661	5.42527e-08	0.00165756
14780	26	9.93621e-08	0.00334203	3.34024e-08	0.00112348	2.06174e-06	0.0294755	6.71796e-07	0.00960427	1.71172e-06	0.0213325	5.58638e-07	0.00696207	2.16938e-06	0.0326017	7.06432e-07	0.0106163	1.26201e-06	0.0181212	4.13461e-07	0.0059369	1.74649e-07	0.00504831	5.73634e-08	0.00165812
14790	26	9.57392e-08	0.003343	3.21845e-08	0.00112381	2.06568e-06	0.0294961	6.73078e-07	0.00961099	1.71361e-06	0.0213496	5.59253e-07	0.00696767	2.17317e-06	0.0326234	7.07665e-07	0.0106234	1.27403e-06	0.0181339	4.174e-07	0.00594106	1.77316e-07	0.00505006	5.82396e-08	0.00165869
14800	26	9.28998e-08	0.00334395	3.123e-08	0.00112413	2.07039e-06	0.0295168	6.74615e-07	0.00961773	1.71828e-06	0.0213668	5.60778e-07	0.00697326	2.17915e-06	0.0326451	7.09613e-07	0.0106305	1.28792e-06	0.0181467	4.21951e-07	0.00594525	1.75874e-07	0.00505183	5.77658e-08	0.00165927
14810	26	9.89107e-08	0.00334492	3.32506e-08	0.00112446	2.08524e-06	0.0295376	6.79452e-07	0.0096245	1.72762e-06	0.021384	5.63827e-07	0.00697889	2.18293e-06	0.0326669	7.10845e-07	0.0106376	1.28775e-06	0.0181596	4.21896e-07	0.00594947	1.76652e-07	0.00505359	5.80213e-08	0.00165985
14820	26	1.0735e-07	0.00334595	3.60878e-08	0.0011248	2.09184e-06	0.0295585	6.81603e-07	0.00963131	1.73258e-06	0.0214013	5.65445e-07	0.00698453	2.18385e-06	0.0326888	7.11144e-07	0.0106447	1.28697e-06	0.0181724	4.21639e-07	0.00595368	1.83073e-07	0.00505539	6.01304e-08	0.00166045
14830	26	1.14427e-07	0.00334706	3.84668e-08	0.00112518	2.09466e-06	0.0295794	6.82523e-07	0.00963813	1.73282e-06	0.0214186	5.65524e-07	0.00699019	2.17608e-06	0.0327106	7.08614e-07	0.0106518	1.28879e-06	0.0181853	4.22236e-07	0.00595791	1.842e-07	0.00505722	6.05004e-08	0.00166105
14840	26	1.20227e-07	0.00334823	4.04166e-08	0.00112557	2.09557e-06	0.0296004	6.82818e-07	0.00964495	1.73228e-06	0.021436	5.65348e-07	0.00699584	2.16859e-06	0.0327323	7.06173e-07	0.0106589	1.29087e-06	0.0181982	4.22916e-07	0.00596213	1.82958e-07	0.00505907	6.00927e-08	0.00166165
14850	26	1.27233e-07	0.00334947	4.27719e-08	0.00112598	2.09361e-06	0.0296213	6.8218e-07	0.00965178	1.73593e-06	0.0214533	5.66538e-07	0.0070015	2.1764e-06	0.032754	7.08716e-07	0.0106659	1.28815e-06	0.0182111	4.22026e-07	0.00596635	1.90006e-07	0.00506093	6.24075e-08	0.00166226
14860	26	1.25118e-07	0.00335072	4.20607e-08	0.00112641	2.09914e-06	0.0296423	6.83981e-07	0.00965861	1.74008e-06	0.0214707	5.67893e-07	0.00700718	2.17564e-06	0.0327758	7.0847e-07	0.010673	1.28906e-06	0.018224	4.22324e-07	0.00597058	1.98501e-07	0.00506288	6.51978e-08	0.00166291
14870	26	1.26907e-07	0.00335199	4.26621e-08	0.00112683	2.0993e-06	0.0296633	6.84034e-07	0.00966545	1.74476e-06	0.0214881	5.69421e-07	0.00701286	2.17665e-06	0.0327975	7.08797e-07	0.0106801	1.28868e-06	0.0182369	4.22201e-07	0.0059748	2.03618e-07	0.00506489	6.68786e-08	0.00166356
14880	26	1.33177e-07	0.00335328	4.477e-08	0.00112727	2.09387e-06	0.0296842	6.82263e-07	0.00967228	1.74986e-06	0.0215056	5.71083e-07	0.00701856	2.18017e-06	0.0328193	7.09944e-07	0.0106872	1.28676e-06	0.0182498	4.21572e-07	0.00597902	2.05569e-07	0.00506693	6.75191e-08	0.00166423
14890	26	1.28426e-07	0.00335456	4.31728e-08	0.0011277	2.08624e-06	0.0297051	6.79779e-07	0.00967909	1.75069e-06	0.0215231	5.71355e-07	0.00702428	2.17986e-06	0.0328411	7.09844e-07	0.0106943	1.29176e-06	0.0182627	4.2321e-07	0.00598325	2.21085e-07	0.00506913	7.26153e-08	0.00166496
14900	26	1.25306e-07	0.00335585	4.2124e-08	0.00112813	2.07907e-06	0.029726	6.77442e-07	0.00968588	1.74955e-06	0.0215406	5.70982e-07	0.00702999	2.18084e-06	0.0328629	7.10163e-07	0.0107014	1.2966e-06	0.0182756	4.24796e-07	0.00598749	2.3448e-07	0.00507136	7.70149e-08	0.00166569
14910	26	1.31873e-07	0.00335714	4.43315e-08	0.00112857	2.07461e-06	0.0297467	6.75989e-07	0.00969264	1.74162e-06	0.021558	5.68395e-07	0.00703568	2.18776e-06	0.0328848	7.12417e-07	0.0107085	1.30069e-06	0.0182886	4.26135e-07	0.00599174	2.35767e-07	0.00507371	7.74379e-08	0.00166646
14920	26	1.43563e-07	0.00335851	4.82613e-08	0.00112902	2.0767e-06	0.0297675	6.76671e-07	0.00969941	1.7353e-06	0.0215754	5.66332e-07	0.00704136	2.18934e-06	0.0329067	7.12931e-07	0.0107156	1.30357e-06	0.0183016	4.27078e-07	0.00599601	2.36509e-07	0.00507607	7.76814e-08	0.00166724
14930	26	1.49372e-07	0.00335998	5.02142e-08	0.00112952	2.08386e-06	0.0297883	6.79002e-07	0.00970619	1.7361e-06	0.0215928	5.66593e-07	0.00704702	2.17691e-06	0.0329285	7.08884e-07	0.0107227	1.30483e-06	0.0183147	4.27491e-07	0.00600028	2.51413e-07	0.00507852	8.25768e-08	0.00166804
14940	26	1.47654e-07	0.00336145	4.96367e-08	0.00113001	2.0886e-06	0.0298091	6.80548e-07	0.00971298	1.7379e-06	0.0216101	5.67181e-07	0.00705269	2.16494e-06	0.0329502	7.04987e-07	0.0107298	1.30433e-06	0.0183277	4.27326e-07	0.00600455	2.70012e-07	0.00508112	8.86855e-08	0.0016689
14950	26	1.42692e-07	0.00336291	4.79685e-08	0.0011305	2.08905e-06	0.02983	6.80695e-07	0.00971979	1.7369e-06	0.0216275	5.66855e-07	0.00705836	2.1626e-06	0.0329718	7.04223e-07	0.0107369	1.3067e-06	0.0183408	4.28104e-07	0.00600883	2.78588e-07	0.00508386	9.15023e-08	0.0016698
14960	26	1.4463e-07	0.00336435	4.862e-08	0.00113099	2.09019e-06	0.0298509	6.81065e-07	0.0097266	1.73903e-06	0.0216449	5.6755e-07	0.00706403	2.15515e-06	0.0329934	7.01797e-07	0.0107439	1.3054e-06	0.0183538	4.27679e-07	0.00601311	2.75943e-07	0.00508663	9.06336e-08	0.00167071
14970	26	1.452e-07	0.0033658	4.88115e-08	0.00113147	2.09054e-06	0.0298718	6.8118e-07	0.00973341	1.74232e-06	0.0216623	5.68623e-07	0.00706971	2.15728e-06	0.033015	7.0249e-07	0.0107509	1.30361e-06	0.0183669	4.27091e-07	0.00601738	2.71995e-07	0.00508937	8.93367e-08	0.00167161
14980	26	1.41801e-07	0.00336723	4.76689e-08	0.00113196	2.08513e-06	0.0298927	6.79417e-07	0.00974021	1.74796e-06	0.0216798	5.70466e-07	0.00707541	2.17317e-06	0.0330366	7.07665e-07	0.010758	1.3061e-06	0.0183799	4.27906e-07	0.00602166	2.68196e-07	0.00509207	8.80892e-08	0.00167249
14990	26	1.41144e-07	0.00336865	4.74483e-08	0.00113243	2.07841e-06	0.0299135	6.77228e-07	0.009747	1.75025e-06	0.0216972	5.71212e-07	0.00708112	2.17581e-06	0.0330584	7.08525e-07	0.010765	1.30284e-06	0.0183929	4.26837e-07	0.00602593	2.65814e-07	0.00509475	8.73066e-08	0.00167337
15000	26	1.44893e-07	0.00337008	4.87083e-08	0.00113292	2.07583e-06	0.0299343	6.76385e-07	0.00975376	1.74202e-06	0.0217147	5.68525e-07	0.00708681	2.17196e-06	0.0330801	7.07273e-07	0.0107721	1.30422e-06	0.018406	4.27292e-07	0.0060302	2.66543e-07	0.00509741	8.75461e-08	0.00167425
15010	26	1.45715e-07	0.00337152	4.89847e-08	0.0011334	2.07498e-06	0.0299551	6.7611e-07	0.00976053	1.739e-06	0.0217321	5.67539e-07	0.0070925	2.16526e-06	0.0331018	7.05091e-07	0.0107792	1.29925e-06	0.018419	4.25662e-07	0.00603446	2.61452e-07	0.00510003	8.58739e-08	0.00167511
15020	26	1.38948e-07	0.00337294	4.67099e-08	0.00113388	2.07491e-06	0.0299758	6.76087e-07	0.00976729	1.73898e-06	0.0217495	5.67533e-07	0.00709817	2.15776e-06	0.0331234	7.02647e-07	0.0107862	1.28084e-06	0.0184319	4.19632e-07	0.00603868	2.53155e-07	0.00510263	8.3149e-08	0.00167596
15030	26	1.36242e-07	0.00337433	4.58002e-08	0.00113434	2.07736e-06	0.0299966	6.76885e-07	0.00977406	1.7419e-06	0.0217669	5.68488e-07	0.00710385	2.15078e-06	0.033145	7.00376e-07	0.0107932	1.27188e-06	0.0184447	4.16694e-07	0.00604287	2.3735e-07	0.00510507	7.79577e-08	0.00167676
15040	26	1.35748e-07	0.00337569	4.56342e-08	0.0011348	2.07845e-06	0.0300173	6.77242e-07	0.00978082	1.74605e-06	0.0217844	5.6984e-07	0.00710955	2.14394e-06	0.0331664	6.98146e-07	0.0108002	1.26745e-06	0.0184574	4.15245e-07	0.00604703	2.24728e-07	0.00510736	7.3812e-08	0.00167751
15050	26	1.34683e-07	0.00337704	4.52761e-08	0.00113525	2.07721e-06	0.0300381	6.76836e-07	0.00978759	1.73888e-06	0.0218018	5.67502e-07	0.00711523	2.1367e-06	0.0331878	6.95788e-07	0.0108072	1.26049e-06	0.01847	4.12964e-07	0.00605117	2.15436e-07	0.00510957	7.07599e-08	0.00167824
15060	26	1.38039e-07	0.00337841	4.64043e-08	0.00113571	2.08294e-06	0.0300589	6.78704e-07	0.00979437	1.73426e-06	0.0218191	5.65995e-07	0.0071209	2.14478e-06	0.0332093	6.98419e-07	0.0108142	1.2585e-06	0.0184826	4.12312e-07	0.0060553	2.13349e-07	0.00511172	7.00745e-08	0.00167895
15070	26	1.33819e-07	0.00337976	4.49856e-08	0.00113617	2.06957e-06	0.0300797	6.74348e-07	0.00980114	1.73468e-06	0.0218365	5.6613e-07	0.00712656	2.14924e-06	0.0332307	6.99875e-07	0.0108212	1.25676e-06	0.0184952	4.11743e-07	0.00605942	2.26589e-07	0.00511392	7.44233e-08	0.00167967
15080	26	1.27048e-07	0.00338107	4.27094e-08	0.00113661	2.05761e-06	0.0301003	6.7045e-07	0.00980786	1.72732e-06	0.0218538	5.63728e-07	0.00713221	2.15094e-06	0.0332522	7.00427e-07	0.0108282	1.25612e-06	0.0185077	4.11532e-07	0.00606354	2.37542e-07	0.00511624	7.80207e-08	0.00168043
15090	26	1.27557e-07	0.00338235	4.28805e-08	0.00113704	2.05717e-06	0.0301209	6.70307e-07	0.00981457	1.71385e-06	0.021871	5.59332e-07	0.00713782	2.15538e-06	0.0332738	7.01871e-07	0.0108352	1.2598e-06	0.0185203	4.12737e-07	0.00606766	2.32286e-07	0.00511857	7.62945e-08	0.0016812
15100	26	1.33924e-07	0.00338365	4.50212e-08	0.00113748	2.06853e-06	0.0301416	6.74006e-07	0.0098213	1.70858e-06	0.0218881	5.57612e-07	0.00714341	2.16224e-06	0.0332953	7.04106e-07	0.0108422	1.26795e-06	0.0185329	4.15409e-07	0.0060718	2.25528e-07	0.00512087	7.40747e-08	0.00168195
15110	26	1.39509e-07	0.00338502	4.68986e-08	0.00113794	2.07418e-06	0.0301622	6.75847e-07	0.00982804	1.71256e-06	0.0219052	5.58912e-07	0.00714899	2.17121e-06	0.033317	7.07027e-07	0.0108493	1.26893e-06	0.0185456	4.1573e-07	0.00607595	2.27475e-07	0.00512314	7.47141e-08	0.0016827
15120	26	1.32268e-07	0.00338637	4.44642e-08	0.00113839	2.07507e-06	0.030183	6.76139e-07	0.0098348	1.72051e-06	0.0219224	5.61507e-07	0.00715459	2.18077e-06	0.0333388	7.1014e-07	0.0108564	1.26469e-06	0.0185583	4.14341e-07	0.0060801	2.35031e-07	0.00512546	7.71962e-08	0.00168346
15130	26	1.15643e-07	0.00338761	3.88756e-08	0.00113881	2.07714e-06	0.0302038	6.76813e-07	0.00984156	1.7183e-06	0.0219396	5.60784e-07	0.0071602	2.17908e-06	0.0333606	7.0959e-07	0.0108634	1.25732e-06	0.0185709	4.11926e-07	0.00608423	2.3814e-07	0.0051278	7.82171e-08	0.00168423
15140	26	1.05172e-07	0.00338871	3.53554e-08	0.00113918	2.07681e-06	0.0302245	6.76704e-07	0.00984833	1.71453e-06	0.0219567	5.59555e-07	0.0071658	2.16322e-06	0.0333823	7.04427e-07	0.0108705	1.252e-06	0.0185835	4.10182e-07	0.00608834	2.23312e-07	0.0051301	7.3347e-08	0.00168498
15150	26	9.62005e-08	0.00338972	3.23396e-08	0.00113952	2.07369e-06	0.0302453	6.75689e-07	0.00985509	1.71169e-06	0.0219739	5.58628e-07	0.0071714	2.16619e-06	0.0334039	7.05394e-07	0.0108776	1.24605e-06	0.0185959	4.08235e-07	0.00609244	2.09887e-07	0.00513225	6.89374e-08	0.00168569
15160	26	9.10672e-08	0.00339066	3.06139e-08	0.00113983	2.06838e-06	0.030266	6.7396e-07	0.00986184	1.71376e-06	0.021991	5.59304e-07	0.00717699	2.16935e-06	0.0334256	7.06423e-07	0.0108846	1.24673e-06	0.0186084	4.08456e-07	0.00609652	2.00551e-07	0.00513432	6.58712e-08	0.00168637
15170	26	9.01655e-08	0.00339157	3.03108e-08	0.00114014	2.06283e-06	0.0302866	6.72149e-07	0.00986857	1.70868e-06	0.0220081	5.57645e-07	0.00718257	2.16951e-06	0.0334473	7.06474e-07	0.0108917	1.25361e-06	0.0186209	4.10709e-07	0.00610062	2.01607e-07	0.00513634	6.62179e-08	0.00168703
15180	26	9.37147e-08	0.0033925	3.15039e-08	0.00114045	2.0572e-06	0.0303072	6.70317e-07	0.00987528	1.6978e-06	0.0220252	5.54095e-07	0.00718813	2.172e-06	0.033469	7.07286e-07	0.0108988	1.26139e-06	0.0186335	4.13257e-07	0.00610474	2.00452e-07	0.00513834	6.58384e-08	0.00168769
15190	26	9.77548e-08	0.00339345	3.28621e-08	0.00114077	2.05312e-06	0.0303278	6.68988e-07	0.00988198	1.69161e-06	0.0220421	5.52075e-07	0.00719366	2.16844e-06	0.0334907	7.06124e-07	0.0109058	1.2679e-06	0.0186461	4.15391e-07	0.00610888	1.98554e-07	0.00514034	6.52152e-08	0.00168835
15200	26	1.01251e-07	0.00339444	3.40373e-08	0.0011411	2.04801e-06	0.0303483	6.67323e-07	0.00988866	1.68932e-06	0.022059	5.51327e-07	0.00719918	2.15476e-06	0.0335123	7.0167e-07	0.0109129	1.27218e-06	0.0186588	4.16794e-07	0.00611304	1.9867e-07	0.00514233	6.52532e-08	0.001689
15210	26	9.66165e-08	0.00339543	3.24794e-08	0.00114143	2.04047e-06	0.0303687	6.64863e-07	0.00989532	1.69315e-06	0.0220759	5.52578e-07	0.0072047	2.14921e-06	0.0335338	6.99863e-07	0.0109199	1.27648e-06	0.0186716	4.18202e-07	0.00611722	2.005e-07	0.00514432	6.58543e-08	0.00168965
15220	26	9.688e-08	0.0033964	3.2568e-08	0.00114176	2.04727e-06	0.0303892	6.67082e-07	0.00990199	1.68756e-06	0.0220928	5.50752e-07	0.00721021	2.14575e-06	0.0335553	6.98735e-07	0.0109269	1.27716e-06	0.0186843	4.18427e-07	0.0061214	2.00812e-07	0.00514633	6.59569e-08	0.00169031
15230	26	9.83992e-08	0.00339737	3.30787e-08	0.00114209	2.05173e-06	0.0304097	6.68533e-07	0.00990866	1.68403e-06	0.0221097	5.49599e-07	0.00721572	2.14123e-06	0.0335767	6.97265e-07	0.0109338	1.27841e-06	0.0186971	4.18836e-07	0.00612559	2.01411e-07	0.00514834	6.61535e-08	0.00169097
15240	26	9.74172e-08	0.00339835	3.27486e-08	0.00114242	2.04442e-06	0.0304302	6.66152e-07	0.00991534	1.69129e-06	0.0221266	5.51968e-07	0.00722122	2.13592e-06	0.0335981	6.95535e-07	0.0109408	1.28061e-06	0.0187099	4.19556e-07	0.00612978	2.04266e-07	0.00515037	6.70912e-08	0.00169164
15250	26	9.51489e-08	0.00339931	3.19861e-08	0.00114274	2.0493e-06	0.0304506	6.67742e-07	0.00992201	1.70136e-06	0.0221435	5.55255e-07	0.00722676	2.13719e-06	0.0336195	6.9595e-07	0.0109478	1.26933e-06	0.0187227	4.15859e-07	0.00613396	2.09626e-07	0.00515243	6.88517e-08	0.00169232
15260	26	9.49879e-08	0.00340027	3.19319e-08	0.00114306	2.05238e-06	0.0304711	6.68745e-07	0.00992869	1.70719e-06	0.0221606	5.57159e-07	0.00723232	2.14517e-06	0.0336409	6.98547e-07	0.0109547	1.26477e-06	0.0187353	4.14366e-07	0.00613811	2.12529e-07	0.00515455	6.98053e-08	0.00169301
15270	26	1.00602e-07	0.00340126	3.38191e-08	0.00114339	2.05587e-06	0.0304917	6.69883e-07	0.00993538	1.71472e-06	0.0221777	5.59615e-07	0.00723791	2.15209e-06	0.0336624	7.00802e-07	0.0109617	1.26572e-06	0.018748	4.14676e-07	0.00614225	2.09618e-07	0.00515664	6.8849e-08	0.0016937
15280	26	1.0109e-07	0.00340225	3.39832e-08	0.00114373	2.06105e-06	0.0305123	6.71571e-07	0.00994209	1.72571e-06	0.0221949	5.63204e-07	0.00724352	2.15535e-06	0.0336839	7.01862e-07	0.0109688	1.26985e-06	0.0187607	4.16031e-07	0.00614641	2.00983e-07	0.0051587	6.60128e-08	0.00169438
15290	26	9.68065e-08	0.00340324	3.25433e-08	0.00114406	2.05637e-06	0.0305328	6.70046e-07	0.00994879	1.72811e-06	0.0222121	5.63986e-07	0.00724915	2.15901e-06	0.0337055	7.03053e-07	0.0109758	1.27148e-06	0.0187734	4.16566e-07	0.00615057	2.03627e-07	0.00516074	6.68813e-08	0.00169505
15300	26	9.43603e-08	0.00340419	3.1721e-08	0.00114438	2.05019e-06	0.0305534	6.68032e-07	0.00995549	1.73235e-06	0.0222294	5.65371e-07	0.00725481	2.16363e-06	0.0337271	7.0456e-07	0.0109828	1.27287e-06	0.0187861	4.17021e-07	0.00615474	2.10091e-07	0.0051628	6.90046e-08	0.00169572
15310	26	8.91488e-08	0.0034051	2.9969e-08	0.00114469	2.04979e-06	0.0305739	6.67902e-07	0.00996217	1.74678e-06	0.0222468	5.7008e-07	0.00726048	2.16833e-06	0.0337488	7.0609e-07	0.0109899	1.27592e-06	0.0187989	4.18019e-07	0.00615891	2.14224e-07	0.00516492	7.03618e-08	0.00169642
15320	26	8.29517e-08	0.00340599	2.78857e-08	0.00114498	2.0518e-06	0.0305944	6.68556e-07	0.00996885	1.7578e-06	0.0222644	5.73675e-07	0.0072662	2.16482e-06	0.0337704	7.04946e-07	0.0109969	1.27827e-06	0.0188116	4.18791e-07	0.0061631	2.18981e-07	0.00516709	7.19245e-08	0.00169713
15330	26	9.18585e-08	0.00340687	3.08799e-08	0.00114528	2.04836e-06	0.0306149	6.67437e-07	0.00997552	1.76087e-06	0.0222819	5.74679e-07	0.00727194	2.16489e-06	0.0337921	7.0497e-07	0.011004	1.27635e-06	0.0188244	4.1816e-07	0.00616728	2.2479e-07	0.00516932	7.38325e-08	0.00169786
15340	26	9.06561e-08	0.00340777	3.04757e-08	0.00114558	2.04061e-06	0.0306353	6.64912e-07	0.00998219	1.75829e-06	0.0222995	5.73837e-07	0.00727768	2.16991e-06	0.0338138	7.06604e-07	0.011011	1.27137e-06	0.0188371	4.16528e-07	0.00617145	2.30437e-07	0.00517158	7.56871e-08	0.00169861
15350	26	8.43332e-08	0.00340864	2.83502e-08	0.00114588	2.0417e-06	0.0306558	6.65265e-07	0.00998884	1.75915e-06	0.0223171	5.74115e-07	0.00728342	2.17404e-06	0.0338355	7.07948e-07	0.0110181	1.27073e-06	0.0188498	4.16318e-07	0.00617562	2.27468e-07	0.00517387	7.4712e-08	0.00169936
15360	26	7.26078e-08	0.00340942	2.44085e-08	0.00114614	2.04471e-06	0.0306762	6.66248e-07	0.0099955	1.75655e-06	0.0223347	5.73268e-07	0.00728916	2.16977e-06	0.0338572	7.06559e-07	0.0110252	1.27396e-06	0.0188626	4.17377e-07	0.00617979	2.23512e-07	0.00517612	7.34125e-08	0.0017001
15370	26	6.84982e-08	0.00341015	2.30269e-08	0.00114638	2.04693e-06	0.0306966	6.6697e-07	0.0100022	1.75335e-06	0.0223523	5.72222e-07	0.00729489	2.16334e-06	0.0338789	7.04464e-07	0.0110322	1.2798e-06	0.0188753	4.19289e-07	0.00618397	2.22222e-07	0.00517835	7.29889e-08	0.00170083
15380	26	6.99942e-08	0.00341083	2.35298e-08	0.00114661	2.04469e-06	0.0307171	6.66239e-07	0.0100088	1.7517e-06	0.0223698	5.71686e-07	0.00730061	2.15727e-06	0.0339005	7.02489e-07	0.0110393	1.28694e-06	0.0188882	4.21628e-07	0.00618818	2.23747e-07	0.00518059	7.34898e-08	0.00170157
15390	26	6.79238e-08	0.00341152	2.28338e-08	0.00114685	2.04674e-06	0.0307376	6.66908e-07	0.0100155	1.75049e-06	0.0223873	5.7129e-07	0.00730632	2.16171e-06	0.0339221	7.03934e-07	0.0110463	1.29485e-06	0.0189011	4.24222e-07	0.00619241	2.30018e-07	0.00518285	7.55497e-08	0.00170231
15400	26	6.22575e-08	0.00341217	2.0929e-08	0.00114706	2.0509e-06	0.030758	6.68264e-07	0.0100222	1.74218e-06	0.0224048	5.6858e-07	0.00731202	2.16872e-06	0.0339437	7.06216e-07	0.0110534	1.29937e-06	0.0189141	4.257e-07	0.00619666	2.23665e-07	0.00518511	7.34629e-08	0.00170305
15410	26	5.75202e-08	0.00341277	1.93365e-08	0.00114727	2.05423e-06	0.0307786	6.69349e-07	0.0100289	1.73766e-06	0.0224222	5.67103e-07	0.0073177	2.17559e-06	0.0339655	7.08455e-07	0.0110604	1.29767e-06	0.018927	4.25145e-07	0.00620091	2.17971e-07	0.00518733	7.15927e-08	0.00170378
15420	26	5.68603e-08	0.00341335	1.91146e-08	0.00114746	2.05685e-06	0.0307991	6.70201e-07	0.0100356	1.73888e-06	0.0224395	5.67502e-07	0.00732337	2.18001e-06	0.0339872	7.09894e-07	0.0110675	1.29211e-06	0.01894	4.23322e-07	0.00620515	2.17339e-07	0.0051895	7.1385e-08	0.00170449
15430	26	6.14013e-08	0.00341394	2.06412e-08	0.00114766	2.0596e-06	0.0308197	6.71097e-07	0.0100423	1.73513e-06	0.0224569	5.66277e-07	0.00732904	2.18483e-06	0.0340091	7.11463e-07	0.0110746	1.2919e-06	0.0189529	4.23256e-07	0.00620938	2.12988e-07	0.00519165	6.99558e-08	0.0017052
15440	26	6.87631e-08	0.0034146	2.3116e-08	0.00114788	2.06213e-06	0.0308403	6.71922e-07	0.010049	1.73467e-06	0.0224743	5.66125e-07	0.0073347	2.1878e-06	0.0340309	7.12431e-07	0.0110817	1.29424e-06	0.0189658	4.2402e-07	0.00621362	2.1921e-07	0.00519383	7.19995e-08	0.00170592
15450	26	7.27934e-08	0.0034153	2.44708e-08	0.00114811	2.06371e-06	0.0308609	6.72436e-07	0.0100557	1.73532e-06	0.0224916	5.66338e-07	0.00734036	2.18995e-06	0.0340528	7.1313e-07	0.0110889	1.29842e-06	0.0189788	4.2539e-07	0.00621787	2.25434e-07	0.00519604	7.40439e-08	0.00170664
15460	26	7.16451e-08	0.00341602	2.40848e-08	0.00114836	2.06118e-06	0.0308816	6.71615e-07	0.0100624	1.73689e-06	0.022509	5.6685e-07	0.00734603	2.19565e-06	0.0340747	7.14985e-07	0.011096	1.30475e-06	0.0189918	4.27465e-07	0.00622213	2.22543e-07	0.00519827	7.30942e-08	0.00170737
15470	26	7.76837e-08	0.00341676	2.61148e-08	0.00114861	2.06147e-06	0.0309022	6.71707e-07	0.0100691	1.74019e-06	0.0225264	5.67928e-07	0.0073517	2.19322e-06	0.0340967	7.14193e-07	0.0111032	1.31132e-06	0.0190049	4.29616e-07	0.00622642	2.08863e-07	0.00520044	6.86012e-08	0.00170809
15480	26	8.05856e-08	0.00341756	2.70903e-08	0.00114888	2.0649e-06	0.0309228	6.72826e-07	0.0100759	1.75485e-06	0.0225439	5.72713e-07	0.00735742	2.19251e-06	0.0341186	7.13962e-07	0.0111103	1.31739e-06	0.019018	4.31605e-07	0.00623073	2.06584e-07	0.00520252	6.78525e-08	0.00170877
15490	26	8.17139e-08	0.00341837	2.74696e-08	0.00114915	2.06483e-06	0.0309435	6.72803e-07	0.0100826	1.76638e-06	0.0225615	5.76476e-07	0.00736316	2.19726e-06	0.0341406	7.15511e-07	0.0111174	1.31318e-06	0.0190312	4.30227e-07	0.00623503	2.06302e-07	0.00520458	6.77601e-08	0.00170945
15500	26	8.06747e-08	0.00341918	2.71203e-08	0.00114942	2.06694e-06	0.0309641	6.73491e-07	0.0100893	1.76839e-06	0.0225791	5.77133e-07	0.00736892	2.20318e-06	0.0341626	7.17439e-07	0.0111246	1.30525e-06	0.0190443	4.27629e-07	0.00623932	2.07429e-07	0.00520665	6.81301e-08	0.00171013
15510	26	7.91022e-08	0.00341998	2.65916e-08	0.00114969	2.07423e-06	0.0309848	6.75865e-07	0.0100961	1.76453e-06	0.0225968	5.75872e-07	0.00737469	2.20608e-06	0.0341846	7.18382e-07	0.0111318	1.30709e-06	0.0190573	4.28233e-07	0.0062436	2.08825e-07	0.00520873	6.85887e-08	0.00171081
15520	26	8.30723e-08	0.0034208	2.79263e-08	0.00114996	2.07628e-06	0.0310056	6.76532e-07	0.0101028	1.75489e-06	0.0226144	5.72726e-07	0.00738043	2.20276e-06	0.0342066	7.173e-07	0.011139	1.31933e-06	0.0190705	4.3224e-07	0.00624791	2.14032e-07	0.00521085	7.0299e-08	0.00171151
15530	26	8.30608e-08	0.00342162	2.79224e-08	0.00115024	2.0738e-06	0.0310263	6.75725e-07	0.0101096	1.74814e-06	0.0226319	5.70523e-07	0.00738615	2.20223e-06	0.0342287	7.17127e-07	0.0111461	1.32988e-06	0.0190837	4.35698e-07	0.00625225	2.20715e-07	0.00521303	7.24938e-08	0.00171222
15540	26	7.34094e-08	0.0034224	2.46779e-08	0.0011505	2.06588e-06	0.031047	6.73144e-07	0.0101163	1.74762e-06	0.0226494	5.70354e-07	0.00739185	2.20237e-06	0.0342507	7.17174e-07	0.0111533	1.33078e-06	0.019097	4.35992e-07	0.0062566	2.26559e-07	0.00521526	7.44134e-08	0.00171295
15550	26	6.02159e-08	0.00342307	2.02427e-08	0.00115073	2.06329e-06	0.0310677	6.72299e-07	0.0101231	1.73847e-06	0.0226668	5.67367e-07	0.00739754	2.19708e-06	0.0342727	7.15452e-07	0.0111605	1.32526e-06	0.0191103	4.34185e-07	0.00626095	2.28011e-07	0.00521753	7.48903e-08	0.0017137
15560	26	5.02901e-08	0.00342363	1.69059e-08	0.00115092	2.06314e-06	0.0310883	6.72252e-07	0.0101298	1.73453e-06	0.0226842	5.66083e-07	0.00740321	2.1915e-06	0.0342946	7.13636e-07	0.0111676	1.3289e-06	0.0191236	4.35378e-07	0.00626531	2.23353e-07	0.00521978	7.33605e-08	0.00171444
15570	26	4.78569e-08	0.00342413	1.6088e-08	0.00115108	2.06785e-06	0.031109	6.73788e-07	0.0101365	1.73932e-06	0.0227016	5.67646e-07	0.00740888	2.19394e-06	0.0343166	7.14428e-07	0.0111748	1.33384e-06	0.0191369	4.36996e-07	0.00626966	2.19068e-07	0.005222	7.19529e-08	0.00171517
15580	26	5.19265e-08	0.00342462	1.7456e-08	0.00115125	2.07843e-06	0.0311297	6.77235e-07	0.0101433	1.74853e-06	0.022719	5.70649e-07	0.00741457	2.20721e-06	0.0343386	7.18751e-07	0.0111819	1.32827e-06	0.0191502	4.3517e-07	0.00627403	2.21418e-07	0.0052242	7.27248e-08	0.00171589
15590	26	5.1806e-08	0.00342513	1.74155e-08	0.00115142	2.07402e-06	0.0311504	6.75797e-07	0.01015	1.75365e-06	0.0227365	5.72321e-07	0.00742029	2.21541e-06	0.0343607	7.21421e-07	0.0111891	1.32135e-06	0.0191634	4.32902e-07	0.00627836	2.1832e-07	0.00522639	7.17073e-08	0.00171661
15600	26	5.22299e-08	0.00342566	1.7558e-08	0.0011516	2.06634e-06	0.0311712	6.73293e-07	0.0101568	1.75708e-06	0.022754	5.73442e-07	0.00742601	2.22212e-06	0.0343829	7.23605e-07	0.0111963	1.31511e-06	0.0191766	4.30858e-07	0.00628269	2.1445e-07	0.00522857	7.04363e-08	0.00171732
15610	26	6.41755e-08	0.00342624	2.15738e-08	0.00115179	2.06834e-06	0.0311918	6.73946e-07	0.0101635	1.75862e-06	0.0227716	5.73942e-07	0.00743175	2.22907e-06	0.0344051	7.25869e-07	0.0112036	1.31521e-06	0.0191898	4.30892e-07	0.006287	2.15958e-07	0.00523072	7.09316e-08	0.00171803
15620	26	8.10999e-08	0.003427	2.72632e-08	0.00115205	2.0695e-06	0.0312125	6.74323e-07	0.0101703	1.75362e-06	0.0227892	5.72311e-07	0.00743747	2.22431e-06	0.0344274	7.24319e-07	0.0112108	1.30652e-06	0.0192029	4.28043e-07	0.00629128	2.10197e-07	0.00523283	6.90393e-08	0.00171873
15630	26	9.41421e-08	0.00342787	3.16476e-08	0.00115234	2.06956e-06	0.0312332	6.74342e-07	0.010177	1.74436e-06	0.0228067	5.69289e-07	0.00744319	2.21883e-06	0.0344496	7.22536e-07	0.0112181	1.29264e-06	0.0192159	4.23496e-07	0.00629555	2.04432e-07	0.00523491	6.71458e-08	0.00171941
15640	26	1.02662e-07	0.00342885	3.45117e-08	0.00115267	2.06173e-06	0.0312539	6.71791e-07	0.0101837	1.73808e-06	0.0228241	5.67241e-07	0.00744887	2.21341e-06	0.0344718	7.20768e-07	0.0112253	1.29123e-06	0.0192288	4.23034e-07	0.00629978	1.99433e-07	0.00523693	6.55037e-08	0.00172007
15650	26	1.07504e-07	0.00342989	3.61395e-08	0.00115302	2.05456e-06	0.0312745	6.69456e-07	0.0101904	1.73734e-06	0.0228415	5.67e-07	0.00745454	2.2119e-06	0.0344939	7.20277e-07	0.0112325	1.29226e-06	0.0192417	4.23372e-07	0.00630402	1.99815e-07	0.00523893	6.56292e-08	0.00172073
15660	26	1.04585e-07	0.00343095	3.51583e-08	0.00115338	2.05052e-06	0.031295	6.6814e-07	0.0101971	1.74337e-06	0.0228589	5.68968e-07	0.00746022	2.19926e-06	0.0345159	7.1616e-07	0.0112397	1.29326e-06	0.0192547	4.23699e-07	0.00630825	2.03379e-07	0.00524095	6.67999e-08	0.00172139
15670	26	1.05748e-07	0.003432	3.55492e-08	0.00115373	2.04415e-06	0.0313155	6.66063e-07	0.0102038	1.74185e-06	0.0228763	5.68471e-07	0.00746591	2.19643e-06	0.0345379	7.15239e-07	0.0112468	1.29436e-06	0.0192676	4.2406e-07	0.00631249	2.05224e-07	0.00524299	6.74058e-08	0.00172206
15680	26	1.07273e-07	0.00343306	3.60617e-08	0.00115409	2.04837e-06	0.0313359	6.67438e-07	0.0102105	1.73596e-06	0.0228937	5.66548e-07	0.00747158	2.20405e-06	0.0345599	7.17723e-07	0.011254	1.29604e-06	0.0192806	4.2461e-07	0.00631673	2.03136e-07	0.00524502	6.67201e-08	0.00172273
15690	26	1.03779e-07	0.00343412	3.48874e-08	0.00115444	2.05569e-06	0.0313564	6.69823e-07	0.0102172	1.72997e-06	0.022911	5.64594e-07	0.00747724	2.21273e-06	0.034582	7.20549e-07	0.0112612	1.29964e-06	0.0192935	4.2579e-07	0.00632099	1.97493e-07	0.00524703	6.48667e-08	0.00172339
15700	26	1.07293e-07	0.00343518	3.60684e-08	0.0011548	2.06248e-06	0.031377	6.72035e-07	0.0102239	1.72581e-06	0.0229283	5.63236e-07	0.00748288	2.21437e-06	0.0346041	7.21081e-07	0.0112684	1.30441e-06	0.0193066	4.27354e-07	0.00632525	1.95182e-07	0.00524899	6.41076e-08	0.00172403
15710	26	1.09663e-07	0.00343626	3.68652e-08	0.00115516	2.06437e-06	0.0313977	6.72654e-07	0.0102306	1.72948e-06	0.0229456	5.64435e-07	0.00748852	2.21162e-06	0.0346263	7.20188e-07	0.0112756	1.3045e-06	0.0193196	4.27381e-07	0.00632952	1.96855e-07	0.00525096	6.46572e-08	0.00172468
15720	26	1.08303e-07	0.00343735	3.64082e-08	0.00115553	2.06532e-06	0.0314183	6.72961e-07	0.0102373	1.72968e-06	0.0229629	5.645e-07	0.00749416	2.2053e-06	0.0346483	7.1813e-07	0.0112828	1.31011e-06	0.0193327	4.29221e-07	0.00633381	2.02631e-07	0.00525296	6.65541e-08	0.00172534
15730	26	1.04896e-07	0.00343841	3.52627e-08	0.00115588	2.06499e-06	0.031439	6.72853e-07	0.010244	1.72942e-06	0.0229802	5.64413e-07	0.00749981	2.20008e-06	0.0346704	7.1643e-07	0.01129	1.31108e-06	0.0193458	4.29539e-07	0.0063381	2.07324e-07	0.00525501	6.80955e-08	0.00172601
15740	26	1.00932e-07	0.00343945	3.39303e-08	0.00115623	2.06123e-06	0.0314596	6.71631e-07	0.0102508	1.72983e-06	0.0229975	5.64547e-07	0.00750545	2.19778e-06	0.0346924	7.15679e-07	0.0112971	1.29402e-06	0.0193588	4.23948e-07	0.00634236	2.10936e-07	0.0052571	6.92821e-08	0.00172669
15750	26	1.01005e-07	0.00344046	3.39546e-08	0.00115657	2.05724e-06	0.0314802	6.70329e-07	0.0102575	1.72933e-06	0.0230148	5.64385e-07	0.0075111	2.19986e-06	0.0347144	7.16356e-07	0.0113043	1.27735e-06	0.0193717	4.18489e-07	0.00634658	2.13248e-07	0.00525922	7.00414e-08	0.00172739
15760	26	1.11349e-07	0.00344152	3.74319e-08	0.00115693	2.05346e-06	0.0315007	6.69096e-07	0.0102642	1.72943e-06	0.023032	5.64418e-07	0.00751674	2.19823e-06	0.0347363	7.15827e-07	0.0113115	1.26874e-06	0.0193844	4.15668e-07	0.00635075	2.17091e-07	0.00526137	7.13037e-08	0.0017281
15770	26	1.16081e-07	0.00344266	3.90228e-08	0.00115731	2.05223e-06	0.0315213	6.68695e-07	0.0102709	1.73774e-06	0.0230494	5.67129e-07	0.0075224	2.18887e-06	0.0347583	7.12777e-07	0.0113186	1.27275e-06	0.0193971	4.16979e-07	0.00635492	2.19516e-07	0.00526355	7.21e-08	0.00172881
15780	26	1.18367e-07	0.00344383	3.97913e-08	0.00115771	2.05629e-06	0.0315418	6.7002e-07	0.0102776	1.74996e-06	0.0230668	5.71119e-07	0.0075281	2.18126e-06	0.0347801	7.10299e-07	0.0113257	1.27862e-06	0.0194099	4.18905e-07	0.00635909	2.19999e-07	0.00526575	7.22588e-08	0.00172954
15790	26	1.20989e-07	0.00344503	4.06726e-08	0.00115811	2.06341e-06	0.0315624	6.72341e-07	0.0102843	1.76178e-06	0.0230844	5.74974e-07	0.00753382	2.1776e-06	0.0348019	7.09108e-07	0.0113328	1.27949e-06	0.0194226	4.1919e-07	0.00636328	2.20362e-07	0.00526795	7.23781e-08	0.00173026
15800	26	1.24838e-07	0.00344626	4.19665e-08	0.00115852	2.07367e-06	0.0315831	6.75684e-07	0.010291	1.76136e-06	0.023102	5.74838e-07	0.00753957	2.17688e-06	0.0348237	7.08872e-07	0.0113399	1.27647e-06	0.0194354	4.18198e-07	0.00636747	2.24838e-07	0.00527018	7.38482e-08	0.00173099
15810	26	1.28866e-07	0.00344753	4.33208e-08	0.00115895	2.07691e-06	0.0316038	6.76738e-07	0.0102978	1.7651e-06	0.0231196	5.76058e-07	0.00754532	2.17568e-06	0.0348455	7.08484e-07	0.011347	1.27822e-06	0.0194482	4.18772e-07	0.00637165	2.21537e-07	0.0052724	7.2764e-08	0.00173172
15820	26	1.35766e-07	0.00344886	4.56402e-08	0.0011594	2.07504e-06	0.0316246	6.7613e-07	0.0103045	1.76591e-06	0.0231373	5.76323e-07	0.00755108	2.1752e-06	0.0348672	7.08327e-07	0.0113541	1.29106e-06	0.019461	4.2298e-07	0.00637586	2.15181e-07	0.00527459	7.06764e-08	0.00173244
15830	26	1.42968e-07	0.00345025	4.80615e-08	0.00115986	2.08519e-06	0.0316454	6.79436e-07	0.0103113	1.76023e-06	0.0231549	5.74468e-07	0.00755684	2.17496e-06	0.034889	7.08248e-07	0.0113612	1.29547e-06	0.019474	4.24424e-07	0.0063801	2.11561e-07	0.00527673	6.94872e-08	0.00173314
15840	26	1.47288e-07	0.0034517	4.95135e-08	0.00116035	2.09501e-06	0.0316663	6.82637e-07	0.0103181	1.76033e-06	0.0231725	5.74503e-07	0.00756259	2.17452e-06	0.0349107	7.08105e-07	0.0113682	1.30104e-06	0.019487	4.26249e-07	0.00638435	2.14441e-07	0.00527886	7.04331e-08	0.00173384
15850	26	1.51225e-07	0.00345319	5.0837e-08	0.00116085	2.1006e-06	0.0316873	6.84456e-07	0.010325	1.76147e-06	0.0231901	5.74874e-07	0.00756833	2.18402e-06	0.0349325	7.11199e-07	0.0113753	1.30714e-06	0.0195	4.28249e-07	0.00638862	2.15805e-07	0.005281	7.08814e-08	0.00173455
15860	26	1.55032e-07	0.00345471	5.21169e-08	0.00116137	2.09605e-06	0.0317083	6.82976e-07	0.0103318	1.76234e-06	0.0232077	5.75156e-07	0.00757408	2.20272e-06	0.0349544	7.17287e-07	0.0113825	1.30533e-06	0.019513	4.27655e-07	0.0063929	2.15274e-07	0.00528316	7.07067e-08	0.00173526
15870	26	1.70358e-07	0.00345638	5.72689e-08	0.00116192	2.09367e-06	0.0317292	6.82201e-07	0.0103386	1.76249e-06	0.0232254	5.75207e-07	0.00757983	2.20303e-06	0.0349764	7.17388e-07	0.0113896	1.30201e-06	0.0195261	4.26566e-07	0.00639717	2.19691e-07	0.00528535	7.21576e-08	0.00173597
15880	26	1.80128e-07	0.0034581	6.05533e-08	0.00116251	2.09675e-06	0.0317502	6.83205e-07	0.0103454	1.76351e-06	0.023243	5.75539e-07	0.00758559	2.20442e-06	0.0349985	7.17842e-07	0.0113968	1.29888e-06	0.0195391	4.25541e-07	0.00640143	2.22392e-07	0.00528755	7.30448e-08	0.0017367
15890	26	1.78581e-07	0.0034599	6.00333e-08	0.00116311	2.10737e-06	0.0317712	6.86662e-07	0.0103523	1.76911e-06	0.0232607	5.77366e-07	0.00759136	2.20982e-06	0.0350206	7.19599e-07	0.011404	1.29905e-06	0.0195521	4.25598e-07	0.00640569	2.22705e-07	0.00528978	7.31475e-08	0.00173743
15900	26	1.68277e-07	0.00346163	5.65693e-08	0.00116369	2.11703e-06	0.0317923	6.89809e-07	0.0103592	1.7757e-06	0.0232784	5.79517e-07	0.00759713	2.21027e-06	0.0350427	7.19745e-07	0.0114112	1.29836e-06	0.0195651	4.25371e-07	0.00640994	2.27914e-07	0.00529203	7.48584e-08	0.00173817
15910	26	1.63361e-07	0.00346329	5.49169e-08	0.00116425	2.12364e-06	0.0318135	6.91964e-07	0.0103661	1.77249e-06	0.0232961	5.78471e-07	0.00760292	2.20247e-06	0.0350647	7.17208e-07	0.0114184	1.29453e-06	0.019578	4.24117e-07	0.00641419	2.2536e-07	0.00529429	7.40196e-08	0.00173891
15920	26	1.69089e-07	0.00346497	5.68423e-08	0.00116481	2.12642e-06	0.0318348	6.92872e-07	0.010373	1.77175e-06	0.0233138	5.78227e-07	0.00760871	2.19878e-06	0.0350867	7.16004e-07	0.0114256	1.29104e-06	0.019591	4.22974e-07	0.00641843	2.21219e-07	0.00529652	7.26595e-08	0.00173965
15930	26	1.79448e-07	0.00346669	6.03249e-08	0.00116539	2.12488e-06	0.031856	6.9237e-07	0.0103799	1.77085e-06	0.0233316	5.77933e-07	0.00761449	2.20077e-06	0.0351087	7.16653e-07	0.0114327	1.28779e-06	0.0196039	4.2191e-07	0.00642265	2.18936e-07	0.00529873	7.19096e-08	0.00174037
15940	26	1.82419e-07	0.00346851	6.13237e-08	0.001166	2.12327e-06	0.0318773	6.91845e-07	0.0103869	1.76351e-06	0.0233492	5.75539e-07	0.00762025	2.1986e-06	0.0351307	7.15946e-07	0.0114399	1.28424e-06	0.0196167	4.20745e-07	0.00642686	2.12555e-07	0.00530088	6.98139e-08	0.00174107
15950	26	1.7129e-07	0.00347026	5.75823e-08	0.00116659	2.11704e-06	0.0318985	6.89814e-07	0.0103938	1.76151e-06	0.0233668	5.74885e-07	0.00762601	2.20437e-06	0.0351527	7.17824e-07	0.011447	1.28618e-06	0.0196296	4.21379e-07	0.00643108	2.08874e-07	0.00530299	6.86048e-08	0.00174177
15960	26	1.58112e-07	0.00347191	5.31523e-08	0.00116715	2.10757e-06	0.0319196	6.86729e-07	0.0104007	1.76305e-06	0.0233845	5.75388e-07	0.00763176	2.2121e-06	0.0351748	7.20344e-07	0.0114542	1.28778e-06	0.0196424	4.21905e-07	0.00643529	2.07182e-07	0.00530507	6.80489e-08	0.00174245
15970	26	1.53811e-07	0.00347347	5.17063e-08	0.00116767	2.10986e-06	0.0319407	6.87474e-07	0.0104075	1.76572e-06	0.0234021	5.76261e-07	0.00763752	2.21255e-06	0.0351969	7.20489e-07	0.0114614	1.28647e-06	0.0196553	4.21474e-07	0.00643951	2.05588e-07	0.00530713	6.75255e-08	0.00174313
15980	26	1.52612e-07	0.00347501	5.13032e-08	0.00116819	2.11129e-06	0.0319618	6.87939e-07	0.0104144	1.76854e-06	0.0234198	5.77181e-07	0.00764329	2.20424e-06	0.035219	7.17784e-07	0.0114686	1.28483e-06	0.0196682	4.20938e-07	0.00644372	2.00182e-07	0.00530915	6.57497e-08	0.00174379
15990	26	1.47663e-07	0.00347651	4.96397e-08	0.00116869	2.11025e-06	0.0319829	6.87602e-07	0.0104213	1.77131e-06	0.0234375	5.78085e-07	0.00764906	2.20077e-06	0.0352411	7.16652e-07	0.0114758	1.28543e-06	0.019681	4.21134e-07	0.00644793	1.9866e-07	0.00531116	6.52499e-08	0.00174445
16000	26	1.4109e-07	0.00347794	4.74301e-08	0.00116917	2.11437e-06	0.032004	6.88944e-07	0.0104282	1.76545e-06	0.0234552	5.76171e-07	0.00765483	2.20562e-06	0.0352631	7.18231e-07	0.011483	1.2917e-06	0.0196939	4.23188e-07	0.00645216	2.0928e-07	0.00531321	6.87381e-08	0.00174512
16010	26	1.34528e-07	0.00347933	4.5224e-08	0.00116964	2.1148e-06	0.0320252	6.89083e-07	0.0104351	1.75844e-06	0.0234728	5.73885e-07	0.00766058	2.21027e-06	0.0352852	7.19746e-07	0.0114902	1.29195e-06	0.0197068	4.23272e-07	0.00645638	2.15189e-07	0.00531532	7.06791e-08	0.00174582
16020	26	1.29185e-07	0.00348064	4.3428e-08	0.00117008	2.11205e-06	0.0320463	6.88189e-07	0.0104419	1.75245e-06	0.0234903	5.71929e-07	0.00766631	2.1975e-06	0.0353072	7.15588e-07	0.0114973	1.2869e-06	0.0197197	4.21616e-07	0.00646061	2.14925e-07	0.00531746	7.05921e-08	0.00174652
16030	26	1.29601e-07	0.00348195	4.35677e-08	0.00117052	2.10083e-06	0.0320673	6.84534e-07	0.0104488	1.74597e-06	0.0235078	5.69816e-07	0.00767202	2.19099e-06	0.0353291	7.13468e-07	0.0115045	1.276e-06	0.0197325	4.18046e-07	0.0064648	2.05088e-07	0.00531955	6.73613e-08	0.00174721
16040	26	1.36911e-07	0.00348328	4.60252e-08	0.00117097	2.09307e-06	0.0320884	6.82003e-07	0.0104556	1.73389e-06	0.0235252	5.65871e-07	0.00767769	2.19243e-06	0.0353511	7.13938e-07	0.0115116	1.26714e-06	0.0197452	4.15141e-07	0.00646897	1.96332e-07	0.00532157	6.44854e-08	0.00174787
16050	26	1.42585e-07	0.00348467	4.79325e-08	0.00117144	2.1026e-06	0.0321093	6.85108e-07	0.0104625	1.72917e-06	0.0235425	5.64333e-07	0.00768335	2.19376e-06	0.035373	7.14371e-07	0.0115188	1.26193e-06	0.0197579	4.13437e-07	0.00647312	1.90463e-07	0.00532351	6.25578e-08	0.00174851
16060	26	1.4502e-07	0.00348611	4.87513e-08	0.00117192	2.10339e-06	0.0321304	6.85367e-07	0.0104693	1.72934e-06	0.0235598	5.64388e-07	0.00768899	2.19395e-06	0.0353949	7.14433e-07	0.0115259	1.26467e-06	0.0197705	4.14332e-07	0.00647726	1.94106e-07	0.00532545	6.37542e-08	0.00174915
16070	26	1.46294e-07	0.00348757	4.91793e-08	0.00117241	2.09886e-06	0.0321514	6.8389e-07	0.0104762	1.72472e-06	0.0235771	5.62879e-07	0.00769463	2.19082e-06	0.0354168	7.13412e-07	0.011533	1.2697e-06	0.0197832	4.1598e-07	0.00648141	1.98955e-07	0.0053274	6.53468e-08	0.00174979
16080	26	1.47744e-07	0.00348904	4.96669e-08	0.0011729	2.08725e-06	0.0321723	6.80107e-07	0.010483	1.73259e-06	0.0235944	5.65447e-07	0.00770027	2.17711e-06	0.0354387	7.0895e-07	0.0115402	1.27225e-06	0.0197959	4.16818e-07	0.00648557	1.95171e-07	0.00532937	6.41039e-08	0.00175043
16090	26	1.46004e-07	0.0034905	4.90819e-08	0.0011734	2.08384e-06	0.0321932	6.78997e-07	0.0104898	1.73456e-06	0.0236117	5.66093e-07	0.00770593	2.17368e-06	0.0354604	7.07833e-07	0.0115472	1.2759e-06	0.0198087	4.18012e-07	0.00648975	1.90558e-07	0.0053313	6.25887e-08	0.00175107
16100	26	1.44082e-07	0.00349195	4.84357e-08	0.00117388	2.08547e-06	0.032214	6.79528e-07	0.0104966	1.7351e-06	0.0236291	5.66267e-07	0.00771159	2.1728e-06	0.0354822	7.07546e-07	0.0115543	1.27461e-06	0.0198214	4.17591e-07	0.00649392	1.92099e-07	0.00533322	6.3095e-08	0.0017517
16110	26	1.42195e-07	0.00349338	4.78016e-08	0.00117437	2.0892e-06	0.0322349	6.80743e-07	0.0105034	1.73538e-06	0.0236464	5.66359e-07	0.00771725	2.17095e-06	0.0355039	7.06942e-07	0.0115614	1.27112e-06	0.0198341	4.16447e-07	0.0064981	1.95817e-07	0.00533515	6.43161e-08	0.00175233
16120	26	1.37277e-07	0.00349478	4.61483e-08	0.00117483	2.09544e-06	0.0322558	6.82777e-07	0.0105102	1.73387e-06	0.0236638	5.65865e-07	0.00772292	2.16865e-06	0.0355256	7.06194e-07	0.0115685	1.27536e-06	0.0198469	4.17837e-07	0.00650227	1.87999e-07	0.00533707	6.17482e-08	0.00175296
16130	26	1.45309e-07	0.0034962	4.88483e-08	0.00117531	2.10134e-06	0.0322768	6.84699e-07	0.010517	1.73192e-06	0.0236811	5.65229e-07	0.00772857	2.17082e-06	0.0355473	7.06902e-07	0.0115755	1.27242e-06	0.0198596	4.16871e-07	0.00650644	1.91114e-07	0.00533897	6.27714e-08	0.00175359
16140	26	1.57493e-07	0.00349772	5.29441e-08	0.00117582	2.09637e-06	0.0322978	6.83079e-07	0.0105239	1.73572e-06	0.0236985	5.6647e-07	0.00773423	2.17471e-06	0.035569	7.08169e-07	0.0115826	1.26723e-06	0.0198723	4.15172e-07	0.0065106	1.97142e-07	0.00534091	6.47514e-08	0.00175422
16150	26	1.64392e-07	0.00349933	5.52632e-08	0.00117636	2.09151e-06	0.0323187	6.81497e-07	0.0105307	1.74309e-06	0.0237159	5.68875e-07	0.00773991	2.17865e-06	0.0355908	7.09451e-07	0.0115897	1.25901e-06	0.0198849	4.12479e-07	0.00651473	1.97772e-07	0.00534288	6.49582e-08	0.00175487
16160	26	1.65211e-07	0.00350097	5.55388e-08	0.00117692	2.09109e-06	0.0323396	6.81359e-07	0.0105375	1.74984e-06	0.0237333	5.71077e-07	0.00774561	2.17714e-06	0.0356126	7.08959e-07	0.0115968	1.24838e-06	0.0198975	4.08997e-07	0.00651884	1.9423e-07	0.00534484	6.37949e-08	0.00175551
16170	26	1.59334e-07	0.00350258	5.3563e-08	0.00117746	2.08706e-06	0.0323605	6.80047e-07	0.0105443	1.74892e-06	0.0237508	5.70777e-07	0.00775132	2.17139e-06	0.0356343	7.07087e-07	0.0116039	1.2429e-06	0.0199099	4.072e-07	0.00652292	1.9296e-07	0.00534678	6.33777e-08	0.00175615
16180	26	1.52185e-07	0.00350415	5.11598e-08	0.00117799	2.08443e-06	0.0323814	6.79189e-07	0.0105511	1.74573e-06	0.0237683	5.69737e-07	0.00775702	2.17197e-06	0.035656	7.07273e-07	0.0116109	1.24312e-06	0.0199224	4.07275e-07	0.006527	1.93421e-07	0.00534871	6.35291e-08	0.00175679
16190	26	1.48374e-07	0.00350566	4.98785e-08	0.00117849	2.08791e-06	0.0324022	6.80321e-07	0.0105579	1.74468e-06	0.0237857	5.69396e-07	0.00776272	2.17477e-06	0.0356778	7.08185e-07	0.011618	1.2506e-06	0.0199348	4.09723e-07	0.00653108	1.95442e-07	0.00535065	6.41931e-08	0.00175742
16200	26	1.5162e-07	0.00350717	5.09699e-08	0.001179	2.0857e-06	0.0324231	6.79601e-07	0.0105647	1.7463e-06	0.0238032	5.69922e-07	0.00776841	2.17613e-06	0.0356995	7.0863e-07	0.0116251	1.25089e-06	0.0199473	4.0982e-07	0.00653518	1.95215e-07	0.0053526	6.41185e-08	0.00175806
16210	26	1.54999e-07	0.0035087	5.21056e-08	0.00117951	2.08123e-06	0.0324439	6.78146e-07	0.0105715	1.74915e-06	0.0238207	5.70852e-07	0.00777412	2.17062e-06	0.0357212	7.06834e-07	0.0116322	1.25126e-06	0.0199598	4.09941e-07	0.00653928	1.94279e-07	0.00535455	6.38109e-08	0.0017587
16220	26	1.55902e-07	0.00351025	5.24092e-08	0.00118004	2.0751e-06	0.0324647	6.76149e-07	0.0105783	1.75457e-06	0.0238382	5.7262e-07	0.00777983	2.16374e-06	0.0357429	7.04593e-07	0.0116392	1.25438e-06	0.0199724	4.10962e-07	0.00654338	1.93141e-07	0.00535649	6.34373e-08	0.00175934
16230	26	1.54931e-07	0.0035118	5.20828e-08	0.00118056	2.07415e-06	0.0324855	6.75837e-07	0.010585	1.76538e-06	0.0238558	5.76151e-07	0.00778558	2.15825e-06	0.0357645	7.02808e-07	0.0116463	1.25588e-06	0.0199849	4.11454e-07	0.00654749	1.95773e-07	0.00535844	6.43018e-08	0.00175998
16240	26	1.51427e-07	0.00351334	5.0905e-08	0.00118107	2.07973e-06	0.0325062	6.77658e-07	0.0105918	1.7694e-06	0.0238735	5.7746e-07	0.00779135	2.15443e-06	0.0357861	7.01565e-07	0.0116533	1.25704e-06	0.0199975	4.11833e-07	0.00655161	2.03463e-07	0.00536044	6.68273e-08	0.00176064
16250	26	1.43754e-07	0.00351482	4.83254e-08	0.00118157	2.09594e-06	0.0325271	6.82939e-07	0.0105986	1.76697e-06	0.0238911	5.76669e-07	0.00779712	2.15287e-06	0.0358076	7.01055e-07	0.0116603	1.25947e-06	0.0200101	4.12629e-07	0.00655573	2.19717e-07	0.00536253	7.21662e-08	0.00176133
16260	26	1.51664e-07	0.00351631	5.09847e-08	0.00118207	2.1014e-06	0.0325481	6.84719e-07	0.0106054	1.7599e-06	0.0239088	5.7436e-07	0.00780287	2.15842e-06	0.0358292	7.02862e-07	0.0116673	1.24657e-06	0.0200226	4.08405e-07	0.00655983	2.26188e-07	0.00536477	7.42915e-08	0.00176206
16270	26	1.56107e-07	0.00351784	5.24783e-08	0.00118259	2.10455e-06	0.0325691	6.85745e-07	0.0106123	1.76416e-06	0.0239264	5.75751e-07	0.00780862	2.15749e-06	0.0358508	7.02559e-07	0.0116743	1.2385e-06	0.020035	4.05759e-07	0.0065639	2.35062e-07	0.00536708	7.7206e-08	0.00176282
16280	26	1.55084e-07	0.0035194	5.21343e-08	0.00118311	2.10811e-06	0.0325902	6.86905e-07	0.0106192	1.7696e-06	0.0239441	5.77526e-07	0.00781439	2.15205e-06	0.0358723	7.00788e-07	0.0116814	1.23544e-06	0.0200474	4.04756e-07	0.00656796	2.44011e-07	0.00536946	8.01454e-08	0.0017636
16290	26	1.49404e-07	0.00352092	5.02249e-08	0.00118362	2.11629e-06	0.0326113	6.89569e-07	0.010626	1.77304e-06	0.0239618	5.7865e-07	0.00782017	2.15063e-06	0.0358938	7.00325e-07	0.0116884	1.23461e-06	0.0200597	4.04484e-07	0.00657201	2.38153e-07	0.00537186	7.82215e-08	0.00176439
16300	26	1.51588e-07	0.00352243	5.09589e-08	0.00118413	2.11864e-06	0.0326325	6.90336e-07	0.0106329	1.77204e-06	0.0239795	5.78325e-07	0.00782595	2.14309e-06	0.0359153	6.97869e-07	0.0116954	1.243e-06	0.0200721	4.07235e-07	0.00657607	2.24812e-07	0.00537417	7.38397e-08	0.00176515
16310	26	1.52281e-07	0.00352395	5.11921e-08	0.00118464	2.11929e-06	0.0326537	6.90548e-07	0.0106398	1.76782e-06	0.0239972	5.76944e-07	0.00783173	2.14226e-06	0.0359367	6.97599e-07	0.0117023	1.24485e-06	0.0200846	4.07841e-07	0.00658014	2.11236e-07	0.00537634	6.93805e-08	0.00176586
16320	26	1.50097e-07	0.00352546	5.04578e-08	0.00118515	2.11676e-06	0.0326748	6.89724e-07	0.0106467	1.76294e-06	0.0240149	5.75353e-07	0.00783749	2.14301e-06	0.0359582	6.97844e-07	0.0117093	1.24414e-06	0.020097	4.07606e-07	0.00658422	2.00856e-07	0.00537841	6.59713e-08	0.00176654
16330	26	1.3931e-07	0.00352691	4.68317e-08	0.00118564	2.10733e-06	0.032696	6.86652e-07	0.0106536	1.75746e-06	0.0240325	5.73566e-07	0.00784323	2.13781e-06	0.0359796	6.9615e-07	0.0117163	1.24739e-06	0.0201095	4.08672e-07	0.0065883	2.03476e-07	0.00538044	6.68316e-08	0.00176721
16340	26	1.20079e-07	0.00352822	4.03668e-08	0.00118608	2.09645e-06	0.032717	6.83105e-07	0.0106605	1.74986e-06	0.02405	5.71083e-07	0.00784896	2.12748e-06	0.0360009	6.92787e-07	0.0117232	1.25877e-06	0.020122	4.124e-07	0.0065924	2.19223e-07	0.00538254	7.20038e-08	0.0017679
16350	26	1.21598e-07	0.00352943	4.08775e-08	0.00118648	2.09641e-06	0.032738	6.83091e-07	0.0106673	1.74183e-06	0.0240675	5.68463e-07	0.00785466	2.13613e-06	0.0360222	6.95604e-07	0.0117302	1.25459e-06	0.0201345	4.11032e-07	0.00659651	2.12399e-07	0.00538468	6.97627e-08	0.0017686
16360	26	1.23145e-07	0.00353066	4.13975e-08	0.0011869	2.09551e-06	0.0327589	6.82798e-07	0.0106741	1.74238e-06	0.0240849	5.68643e-07	0.00786035	2.14584e-06	0.0360436	6.98767e-07	0.0117372	1.25104e-06	0.0201471	4.09869e-07	0.00660062	2.06594e-07	0.00538678	6.7856e-08	0.00176929
16370	26	1.25727e-07	0.0035319	4.22655e-08	0.00118731	2.09395e-06	0.0327799	6.82292e-07	0.010681	1.75201e-06	0.0241024	5.71786e-07	0.00786605	2.15483e-06	0.0360651	7.01693e-07	0.0117442	1.24757e-06	0.0201596	4.08732e-07	0.00660471	2.00319e-07	0.00538882	6.57949e-08	0.00176996
16380	26	1.35792e-07	0.00353321	4.5649e-08	0.00118775	2.09286e-06	0.0328008	6.81935e-07	0.0106878	1.75578e-06	0.0241199	5.73018e-07	0.00787177	2.15184e-06	0.0360867	7.00721e-07	0.0117512	1.24082e-06	0.020172	4.0652e-07	0.00660879	1.84238e-07	0.00539075	6.05129e-08	0.00177059
16390	26	1.32671e-07	0.00353454	4.45999e-08	0.0011882	2.09843e-06	0.0328218	6.8375e-07	0.0106946	1.7576e-06	0.0241375	5.7361e-07	0.0078775	2.15268e-06	0.0361082	7.00993e-07	0.0117582	1.23632e-06	0.0201844	4.05047e-07	0.00661285	1.9675e-07	0.00539268	6.46227e-08	0.00177123
16400	26	1.30699e-07	0.00353586	4.3937e-08	0.00118864	2.10463e-06	0.0328428	6.85772e-07	0.0107015	1.7592e-06	0.024155	5.74133e-07	0.00788324	2.15354e-06	0.0361297	7.01274e-07	0.0117652	1.23694e-06	0.0201968	4.05247e-07	0.0066169	2.0672e-07	0.00539469	6.78972e-08	0.00177189
16410	26	1.31337e-07	0.00353717	4.41512e-08	0.00118909	2.11008e-06	0.0328639	6.87547e-07	0.0107083	1.76025e-06	0.0241726	5.74476e-07	0.00788898	2.15331e-06	0.0361512	7.01199e-07	0.0117722	1.24236e-06	0.0202092	4.07024e-07	0.00662096	2.11182e-07	0.00539677	6.93629e-08	0.00177257
16420	26	1.33665e-07	0.0035385	4.49341e-08	0.00118953	2.11377e-06	0.032885	6.8875e-07	0.0107152	1.75947e-06	0.0241902	5.74222e-07	0.00789473	2.15122e-06	0.0361728	7.00519e-07	0.0117792	1.24975e-06	0.0202216	4.09447e-07	0.00662504	2.124e-07	0.00539889	6.9763e-08	0.00177327
16430	26	1.34969e-07	0.00353984	4.53724e-08	0.00118998	2.1063e-06	0.0329061	6.86315e-07	0.0107221	1.76613e-06	0.0242079	5.76396e-07	0.00790048	2.14858e-06	0.0361943	6.99657e-07	0.0117862	1.25456e-06	0.0202341	4.11021e-07	0.00662914	2.07324e-07	0.00540098	6.80956e-08	0.00177395
16440	26	1.19263e-07	0.00354109	4.00923e-08	0.0011904	2.09649e-06	0.0329271	6.83117e-07	0.0107289	1.7693e-06	0.0242255	5.77429e-07	0.00790625	2.14931e-06	0.0362158	6.99895e-07	0.0117932	1.26193e-06	0.0202467	4.13436e-07	0.00663327	2.02336e-07	0.00540303	6.64573e-08	0.00177463
16450	26	9.40208e-08	0.00354218	3.16068e-08	0.00119077	2.08856e-06	0.032948	6.80535e-07	0.0107357	1.76666e-06	0.0242432	5.76567e-07	0.00791202	2.15526e-06	0.0362373	7.01833e-07	0.0118002	1.26962e-06	0.0202594	4.15956e-07	0.00663741	2.01352e-07	0.00540506	6.61342e-08	0.00177529
16460	26	8.69232e-08	0.00354309	2.92208e-08	0.00119108	2.08997e-06	0.0329689	6.80994e-07	0.0107426	1.75813e-06	0.0242609	5.73783e-07	0.00791777	2.16749e-06	0.0362589	7.05815e-07	0.0118073	1.27046e-06	0.0202721	4.1623e-07	0.00664157	2.10633e-07	0.00540711	6.91824e-08	0.00177597
16470	26	8.97278e-08	0.00354398	3.01636e-08	0.00119137	2.0852e-06	0.0329898	6.7944e-07	0.0107494	1.75729e-06	0.0242784	5.7351e-07	0.00792351	2.1681e-06	0.0362806	7.06015e-07	0.0118143	1.26869e-06	0.0202848	4.15649e-07	0.00664573	2.13164e-07	0.00540923	7.00138e-08	0.00177666
16480	26	9.33178e-08	0.0035449	3.13705e-08	0.00119168	2.07881e-06	0.0330106	6.77359e-07	0.0107561	1.75936e-06	0.024296	5.74185e-07	0.00792925	2.17545e-06	0.0363023	7.08409e-07	0.0118214	1.27367e-06	0.0202975	4.1728e-07	0.0066499	2.21673e-07	0.00541142	7.28086e-08	0.00177738
16490	26	9.56247e-08	0.00354584	3.2146e-08	0.001192	2.07285e-06	0.0330313	6.75414e-07	0.0107629	1.7604e-06	0.0243136	5.74525e-07	0.00793499	2.18207e-06	0.0363241	7.10563e-07	0.0118285	1.27942e-06	0.0203102	4.19167e-07	0.00665408	2.309e-07	0.00541367	7.58391e-08	0.00177812
16500	26	9.41787e-08	0.00354679	3.16599e-08	0.00119232	2.06992e-06	0.0330521	6.74461e-07	0.0107697	1.75485e-06	0.0243312	5.72714e-07	0.00794073	2.17445e-06	0.0363458	7.08081e-07	0.0118356	1.27739e-06	0.020323	4.18502e-07	0.00665827	2.32633e-07	0.00541599	7.64082e-08	0.00177888
16510	26	9.78582e-08	0.00354775	3.28968e-08	0.00119264	2.07167e-06	0.0330728	6.7503e-07	0.0107764	1.74853e-06	0.0243487	5.7065e-07	0.00794645	2.16892e-06	0.0363676	7.0628e-07	0.0118426	1.27004e-06	0.0203358	4.16094e-07	0.00666244	2.30476e-07	0.0054183	7.57e-08	0.00177964
16520	26	1.08022e-07	0.00354878	3.63135e-08	0.00119299	2.07788e-06	0.0330935	6.77053e-07	0.0107832	1.74838e-06	0.0243662	5.70603e-07	0.00795215	2.16637e-06	0.0363892	7.05453e-07	0.0118497	1.25816e-06	0.0203484	4.12202e-07	0.00666658	2.25533e-07	0.00542058	7.40764e-08	0.00178039
16530	26	1.17353e-07	0.00354991	3.94502e-08	0.00119337	2.08253e-06	0.0331143	6.78571e-07	0.0107899	1.75979e-06	0.0243837	5.74324e-07	0.00795788	2.16643e-06	0.0364109	7.05471e-07	0.0118568	1.25333e-06	0.020361	4.10618e-07	0.0066707	2.23671e-07	0.00542283	7.34647e-08	0.00178113
16540	26	1.24412e-07	0.00355111	4.18233e-08	0.00119377	2.0878e-06	0.0331352	6.80288e-07	0.0107967	1.7688e-06	0.0244014	5.77267e-07	0.00796364	2.17565e-06	0.0364326	7.08472e-07	0.0118638	1.25998e-06	0.0203735	4.12797e-07	0.00667481	2.23073e-07	0.00542506	7.32684e-08	0.00178186
16550	26	1.2302e-07	0.00355234	4.13554e-08	0.00119418	2.08346e-06	0.033156	6.78871e-07	0.0108035	1.77144e-06	0.0244191	5.78126e-07	0.00796941	2.17932e-06	0.0364544	7.09669e-07	0.0118709	1.27331e-06	0.0203862	4.17163e-07	0.00667897	2.2603e-07	0.00542731	7.42398e-08	0.0017826
16560	26	1.20894e-07	0.00355357	4.06408e-08	0.0011946	2.08127e-06	0.0331768	6.78158e-07	0.0108103	1.7736e-06	0.0244368	5.78834e-07	0.0079752	2.18062e-06	0.0364762	7.10092e-07	0.011878	1.28735e-06	0.020399	4.21764e-07	0.00668316	2.2743e-07	0.00542957	7.46994e-08	0.00178335
16570	26	1.23115e-07	0.00355479	4.13874e-08	0.00119501	2.08762e-06	0.0331977	6.80227e-07	0.0108171	1.77721e-06	0.0244546	5.80012e-07	0.00798099	2.17893e-06	0.036498	7.09541e-07	0.0118851	1.29953e-06	0.0204119	4.25754e-07	0.0066874	2.25029e-07	0.00543184	7.39108e-08	0.00178409
16580	26	1.27662e-07	0.00355604	4.29161e-08	0.00119543	2.09194e-06	0.0332186	6.81637e-07	0.0108239	1.77721e-06	0.0244723	5.80011e-07	0.00798679	2.16902e-06	0.0365197	7.06313e-07	0.0118922	1.30578e-06	0.020425	4.27803e-07	0.00669167	2.31814e-07	0.00543413	7.61394e-08	0.00178484
16590	26	1.42233e-07	0.00355741	4.78142e-08	0.00119589	2.09556e-06	0.0332395	6.82816e-07	0.0108307	1.77327e-06	0.0244901	5.78724e-07	0.00799258	2.16439e-06	0.0365414	7.04806e-07	0.0118992	1.30656e-06	0.020438	4.28059e-07	0.00669594	2.42728e-07	0.00543651	7.97241e-08	0.00178563
16600	26	1.49929e-07	0.00355887	5.04013e-08	0.00119638	2.09936e-06	0.0332605	6.84053e-07	0.0108376	1.76642e-06	0.0245078	5.76488e-07	0.00799836	2.16849e-06	0.0365631	7.06143e-07	0.0119063	1.30354e-06	0.0204511	4.27069e-07	0.00670022	2.5454e-07	0.00543899	8.36039e-08	0.00178644
16610	26	1.50396e-07	0.00356036	5.05584e-08	0.00119688	2.09992e-06	0.0332815	6.84236e-07	0.0108444	1.76291e-06	0.0245254	5.75344e-07	0.00800412	2.17347e-06	0.0365848	7.07762e-07	0.0119134	1.30012e-06	0.0204641	4.25949e-07	0.00670448	2.53147e-07	0.0054415	8.31462e-08	0.00178726
16620	26	1.38881e-07	0.00356183	4.66875e-08	0.00119737	2.09932e-06	0.0333025	6.84039e-07	0.0108513	1.76071e-06	0.024543	5.74626e-07	0.00800987	2.17876e-06	0.0366065	7.09485e-07	0.0119205	1.29653e-06	0.0204771	4.24771e-07	0.00670874	2.46431e-07	0.00544402	8.09404e-08	0.00178809
16630	26	1.55642e-07	0.00356334	5.23219e-08	0.00119788	2.10674e-06	0.0333235	6.86459e-07	0.0108581	1.75694e-06	0.0245606	5.73396e-07	0.00801561	2.18244e-06	0.0366283	7.10683e-07	0.0119276	1.29156e-06	0.02049	4.23142e-07	0.00671298	2.33261e-07	0.00544639	7.66148e-08	0.00178887
16640	26	1.62426e-07	0.00356491	5.46026e-08	0.00119841	2.09658e-06	0.0333445	6.83149e-07	0.0108649	1.75108e-06	0.0245782	5.71484e-07	0.00802133	2.18482e-06	0.0366502	7.11459e-07	0.0119347	1.28548e-06	0.0205029	4.2115e-07	0.0067172	2.26605e-07	0.0054487	7.44284e-08	0.00178963
16650	26	1.61858e-07	0.00356653	5.44114e-08	0.00119896	2.08944e-06	0.0333655	6.80821e-07	0.0108718	1.74521e-06	0.0245957	5.69568e-07	0.00802704	2.18728e-06	0.036672	7.1226e-07	0.0119418	1.2796e-06	0.0205157	4.19226e-07	0.0067214	2.25783e-07	0.00545096	7.41586e-08	0.00179037
16660	26	1.6303e-07	0.00356816	5.48054e-08	0.0011995	2.08399e-06	0.0333863	6.79044e-07	0.0108786	1.74482e-06	0.0246131	5.69439e-07	0.00803273	2.19315e-06	0.0366939	7.14172e-07	0.0119489	1.27852e-06	0.0205285	4.1887e-07	0.00672559	2.26105e-07	0.00545322	7.42644e-08	0.00179111
16670	26	1.5772e-07	0.00356975	5.30206e-08	0.00120004	2.07736e-06	0.0334071	6.76884e-07	0.0108853	1.7381e-06	0.0246305	5.67248e-07	0.00803842	2.19096e-06	0.0367159	7.13459e-07	0.0119561	1.28628e-06	0.0205414	4.21412e-07	0.0067298	2.13194e-07	0.0054554	7.00236e-08	0.00179183
16680	26	1.52807e-07	0.0035713	5.13689e-08	0.00120056	2.06378e-06	0.0334278	6.7246e-07	0.0108921	1.74682e-06	0.0246479	5.70091e-07	0.00804411	2.18548e-06	0.0367377	7.11675e-07	0.0119632	1.27832e-06	0.0205542	4.18804e-07	0.00673399	2.10676e-07	0.00545753	6.91967e-08	0.00179253
16690	26	1.48365e-07	0.00357281	4.98755e-08	0.00120107	2.05656e-06	0.0334484	6.70109e-07	0.0108988	1.75426e-06	0.0246654	5.7252e-07	0.00804982	2.18005e-06	0.0367596	7.09907e-07	0.0119703	1.27088e-06	0.0205669	4.16367e-07	0.00673817	2.14163e-07	0.00545966	7.03421e-08	0.00179323
16700	26	1.54049e-07	0.00357434	5.17863e-08	0.00120158	2.05531e-06	0.033469	6.69702e-07	0.0109055	1.75581e-06	0.024683	5.73025e-07	0.00805555	2.17559e-06	0.0367813	7.08455e-07	0.0119774	1.27102e-06	0.0205796	4.16412e-07	0.00674234	2.19896e-07	0.00546183	7.22248e-08	0.00179394
16710	26	1.63057e-07	0.00357591	5.48145e-08	0.00120211	2.0544e-06	0.0334895	6.69404e-07	0.0109122	1.7581e-06	0.0247006	5.73773e-07	0.00806128	2.17041e-06	0.0368031	7.06767e-07	0.0119845	1.26767e-06	0.0205923	4.15318e-07	0.0067465	2.25635e-07	0.00546406	7.41099e-08	0.00179467
16720	26	1.67763e-07	0.00357757	5.63968e-08	0.00120266	2.05317e-06	0.0335101	6.69004e-07	0.0109189	1.76025e-06	0.0247182	5.74476e-07	0.00806702	2.1655e-06	0.0368248	7.05169e-07	0.0119915	1.26277e-06	0.020605	4.13712e-07	0.00675064	2.30288e-07	0.00546632	7.5638e-08	0.00179542
16730	26	1.70301e-07	0.00357925	5.72498e-08	0.00120323	2.05339e-06	0.0335306	6.69075e-07	0.0109256	1.76012e-06	0.0247358	5.74434e-07	0.00807276	2.16302e-06	0.0368464	7.04359e-07	0.0119986	1.26039e-06	0.0206176	4.12931e-07	0.00675477	2.30028e-07	0.00546863	7.55528e-08	0.00179617
16740	26	1.65507e-07	0.00358093	5.56382e-08	0.0012038	2.05508e-06	0.0335512	6.69626e-07	0.0109323	1.75372e-06	0.0247533	5.72344e-07	0.0080785	2.15464e-06	0.036868	7.0163e-07	0.0120056	1.26433e-06	0.0206302	4.14223e-07	0.00675891	2.2606e-07	0.0054709	7.42495e-08	0.00179692
16750	26	1.61003e-07	0.00358256	5.4124e-08	0.00120434	2.05564e-06	0.0335717	6.69807e-07	0.010939	1.7475e-06	0.0247708	5.70314e-07	0.00808421	2.15595e-06	0.0368895	7.02058e-07	0.0120126	1.26382e-06	0.0206429	4.14054e-07	0.00676305	2.24037e-07	0.00547315	7.35851e-08	0.00179766
16760	26	1.57419e-07	0.00358416	5.29191e-08	0.00120488	2.05504e-06	0.0335923	6.69613e-07	0.0109457	1.74206e-06	0.0247883	5.68538e-07	0.00808991	2.16257e-06	0.0369111	7.04214e-07	0.0120196	1.26357e-06	0.0206555	4.13972e-07	0.00676719	2.23398e-07	0.00547539	7.33752e-08	0.00179839
16770	26	1.55726e-07	0.00358573	5.23503e-08	0.00120541	2.05282e-06	0.0336128	6.68889e-07	0.0109524	1.74292e-06	0.0248057	5.6882e-07	0.00809559	2.164e-06	0.0369328	7.04681e-07	0.0120267	1.26407e-06	0.0206681	4.14137e-07	0.00677133	2.27731e-07	0.00547766	7.47982e-08	0.00179914
16780	26	1.5139e-07	0.00358726	5.08925e-08	0.00120592	2.04901e-06	0.0336333	6.67648e-07	0.010959	1.74061e-06	0.0248231	5.68066e-07	0.00810128	2.15834e-06	0.0369544	7.02836e-07	0.0120337	1.26107e-06	0.0206808	4.13156e-07	0.00677547	2.30008e-07	0.00547994	7.55462e-08	0.00179989
16790	26	1.50413e-07	0.00358877	5.05639e-08	0.00120643	2.04731e-06	0.0336538	6.67094e-07	0.0109657	1.73236e-06	0.0248405	5.65372e-07	0.00810695	2.15373e-06	0.0369759	7.01336e-07	0.0120407	1.25957e-06	0.0206934	4.12661e-07	0.0067796	2.26794e-07	0.00548223	7.44907e-08	0.00180064
16800	26	1.53712e-07	0.0035903	5.16733e-08	0.00120694	2.0513e-06	0.0336743	6.68392e-07	0.0109724	1.73679e-06	0.0248578	5.66818e-07	0.00811261	2.14476e-06	0.0369974	6.98416e-07	0.0120477	1.25776e-06	0.0207059	4.1207e-07	0.00678372	2.26119e-07	0.00548449	7.42689e-08	0.00180138
16810	26	1.59189e-07	0.00359185	5.35144e-08	0.00120747	2.05048e-06	0.0336948	6.68128e-07	0.0109791	1.74073e-06	0.0248752	5.68106e-07	0.00811828	2.13295e-06	0.0370188	6.94569e-07	0.0120547	1.25742e-06	0.0207185	4.11958e-07	0.00678784	2.30822e-07	0.00548678	7.58136e-08	0.00180214
16820	26	1.59958e-07	0.00359345	5.37727e-08	0.001208	2.05079e-06	0.0337153	6.68228e-07	0.0109858	1.74037e-06	0.0248926	5.67988e-07	0.00812396	2.13062e-06	0.0370401	6.93811e-07	0.0120617	1.26537e-06	0.0207311	4.14563e-07	0.00679198	2.36959e-07	0.00548912	7.78293e-08	0.0018029
16830	26	1.58992e-07	0.00359504	5.3448e-08	0.00120854	2.05449e-06	0.0337358	6.69431e-07	0.0109925	1.73513e-06	0.02491	5.66278e-07	0.00812963	2.13397e-06	0.0370615	6.949e-07	0.0120686	1.26348e-06	0.0207438	4.13943e-07	0.00679611	2.43435e-07	0.00549152	7.99563e-08	0.00180369
16840	26	1.5865e-07	0.00359663	5.33331e-08	0.00120907	2.0582e-06	0.0337564	6.70643e-07	0.0109992	1.73372e-06	0.0249274	5.65818e-07	0.00813529	2.14814e-06	0.0370829	6.99516e-07	0.0120756	1.2563e-06	0.0207564	4.1159e-07	0.00680024	2.51151e-07	0.005494	8.24907e-08	0.00180451
16850	26	1.63241e-07	0.00359825	5.48764e-08	0.00120962	2.05734e-06	0.033777	6.70361e-07	0.0110059	1.7392e-06	0.0249447	5.67606e-07	0.00814097	2.15806e-06	0.0371044	7.02746e-07	0.0120826	1.24997e-06	0.0207689	4.09518e-07	0.00680434	2.54008e-07	0.00549652	8.34291e-08	0.00180533
16860	26	1.64215e-07	0.00359986	5.52039e-08	0.00121016	2.05535e-06	0.0337975	6.69712e-07	0.0110126	1.74878e-06	0.0249622	5.70731e-07	0.00814665	2.16395e-06	0.037126	7.04663e-07	0.0120896	1.24614e-06	0.0207814	4.08262e-07	0.00680844	2.51926e-07	0.00549904	8.27451e-08	0.00180616
16870	26	1.55365e-07	0.00360146	5.22289e-08	0.0012107	2.05863e-06	0.0338181	6.70781e-07	0.0110193	1.75939e-06	0.0249797	5.74194e-07	0.00815238	2.16663e-06	0.0371477	7.05535e-07	0.0120967	1.24692e-06	0.0207939	4.08518e-07	0.00681252	2.42883e-07	0.00550151	7.97751e-08	0.00180697
16880	26	1.55098e-07	0.00360303	5.21389e-08	0.00121122	2.0592e-06	0.0338387	6.70968e-07	0.011026	1.76134e-06	0.0249973	5.74831e-07	0.00815812	2.17128e-06	0.0371693	7.07051e-07	0.0121037	1.25176e-06	0.0208064	4.10104e-07	0.00681662	2.28034e-07	0.00550386	7.4898e-08	0.00180775
16890	26	1.62896e-07	0.00360461	5.47604e-08	0.00121176	2.05545e-06	0.0338593	6.69747e-07	0.0110327	1.75271e-06	0.0250149	5.72015e-07	0.00816386	2.17329e-06	0.0371911	7.07705e-07	0.0121108	1.25295e-06	0.0208189	4.10492e-07	0.00682072	2.23902e-07	0.00550613	7.35406e-08	0.00180849
16900	26	1.64758e-07	0.00360624	5.53865e-08	0.0012123	2.05241e-06	0.0338798	6.68755e-07	0.0110394	1.74623e-06	0.0250324	5.699e-07	0.00816957	2.1684e-06	0.0372128	7.06111e-07	0.0121179	1.25018e-06	0.0208314	4.09586e-07	0.00682482	2.30036e-07	0.0055084	7.55553e-08	0.00180924
16910	26	1.57351e-07	0.00360787	5.28966e-08	0.00121285	2.05309e-06	0.0339003	6.68978e-07	0.0110461	1.7478e-06	0.0250498	5.70412e-07	0.00817527	2.16069e-06	0.0372344	7.03601e-07	0.0121249	1.24946e-06	0.0208439	4.0935e-07	0.00682891	2.32133e-07	0.00551071	7.62442e-08	0.00180999
16920	26	1.58426e-07	0.00360945	5.32578e-08	0.00121338	2.05588e-06	0.0339209	6.69885e-07	0.0110528	1.73638e-06	0.0250672	5.66685e-07	0.00818094	2.1559e-06	0.037256	7.02041e-07	0.0121319	1.25316e-06	0.0208564	4.10564e-07	0.00683302	2.29789e-07	0.00551301	7.54743e-08	0.00181075
16930	26	1.59475e-07	0.00361104	5.36105e-08	0.00121392	2.06035e-06	0.0339415	6.71343e-07	0.0110595	1.73251e-06	0.0250846	5.65421e-07	0.00818661	2.1516e-06	0.0372775	7.00642e-07	0.012139	1.25449e-06	0.0208689	4.11e-07	0.00683712	2.26036e-07	0.00551529	7.42418e-08	0.0018115
16940	26	1.61065e-07	0.00361265	5.41449e-08	0.00121446	2.06477e-06	0.0339621	6.72784e-07	0.0110662	1.73701e-06	0.0251019	5.66891e-07	0.00819227	2.14995e-06	0.0372991	7.00106e-07	0.012146	1.25355e-06	0.0208815	4.10689e-07	0.00684123	2.21993e-07	0.00551754	7.29137e-08	0.00181224
16950	26	1.65318e-07	0.00361428	5.55747e-08	0.00121501	2.05889e-06	0.0339827	6.70867e-07	0.0110729	1.73556e-06	0.0251193	5.66418e-07	0.00819794	2.1577e-06	0.0373206	7.02627e-07	0.012153	1.25612e-06	0.020894	4.11534e-07	0.00684534	2.24979e-07	0.00551977	7.38944e-08	0.00181297
16960	26	1.60288e-07	0.00361589	5.38838e-08	0.00121555	2.05075e-06	0.0340032	6.68216e-07	0.0110796	1.73252e-06	0.0251366	5.65426e-07	0.00820359	2.1669e-06	0.0373422	7.05623e-07	0.01216	1.25367e-06	0.0209066	4.10728e-07	0.00684945	2.30386e-07	0.00552205	7.56702e-08	0.00181372
16970	26	1.5153e-07	0.00361746	5.09396e-08	0.00121607	2.04459e-06	0.0340237	6.66207e-07	0.0110863	1.73271e-06	0.025154	5.65488e-07	0.00820925	2.17474e-06	0.0373639	7.08176e-07	0.0121671	1.25172e-06	0.0209191	4.10089e-07	0.00685356	2.36693e-07	0.00552439	7.7742e-08	0.00181449
16980	26	1.45032e-07	0.00361894	4.87553e-08	0.00121657	2.04598e-06	0.0340442	6.66659e-07	0.0110929	1.74408e-06	0.0251714	5.69199e-07	0.00821493	2.17778e-06	0.0373857	7.09168e-07	0.0121742	1.25906e-06	0.0209317	4.12494e-07	0.00685767	2.38468e-07	0.00552676	7.83248e-08	0.00181526
16990	26	1.4533e-07	0.0036204	4.88553e-08	0.00121706	2.0457e-06	0.0340646	6.6657e-07	0.0110996	1.75137e-06	0.0251888	5.71579e-07	0.00822063	2.17096e-06	0.0374074	7.06946e-07	0.0121813	1.26226e-06	0.0209443	4.13545e-07	0.0068618	2.32626e-07	0.00552912	7.6406e-08	0.00181604
17000	26	1.48278e-07	0.00362186	4.98462e-08	0.00121756	2.04281e-06	0.0340851	6.65628e-07	0.0111063	1.7527e-06	0.0252063	5.72011e-07	0.00822634	2.16167e-06	0.0374291	7.03921e-07	0.0121883	1.26259e-06	0.0209569	4.13653e-07	0.00686594	2.31875e-07	0.00553144	7.61593e-08	0.0018168
17010	26	1.44913e-07	0.00362332	4.87153e-08	0.00121804	2.03848e-06	0.0341055	6.64216e-07	0.0111129	1.75399e-06	0.0252239	5.72434e-07	0.00823207	2.15779e-06	0.0374507	7.02658e-07	0.0121953	1.26363e-06	0.0209695	4.13991e-07	0.00687008	2.18035e-07	0.00553368	7.16135e-08	0.00181754
17020	26	1.36811e-07	0.00362473	4.59914e-08	0.00121852	2.03409e-06	0.0341258	6.62787e-07	0.0111195	1.75921e-06	0.0252414	5.74137e-07	0.0082378	2.15546e-06	0.0374723	7.019e-07	0.0122024	1.26507e-06	0.0209822	4.14464e-07	0.00687422	2.10453e-07	0.00553583	6.91235e-08	0.00181825
17030	26	1.25722e-07	0.00362603	4.22638e-08	0.00121896	2.0301e-06	0.0341462	6.61484e-07	0.0111262	1.75769e-06	0.025259	5.73641e-07	0.00824354	2.15539e-06	0.0374938	7.01877e-07	0.0122094	1.26717e-06	0.0209948	4.15152e-07	0.00687837	2.1539e-07	0.00553796	7.0745e-08	0.00181894
[truncated: 6,663 more rows]

## Sheet: Statistics
Data series	Section name	No. of data	Start time	End time	Duration	Mean	Mean std. dev.	Slope	Slope std. dev.	Minimum	Maximum	Integral	Peak Area
Temperature [Temperature]
Heat flow [Signal, Ch 1:1]
[truncated: 71 more rows]
