# Supplementary material for: Microbial bioenergetics of coral-algal interactions
Source: PeerJ journal article supplement (doi:10.7717/peerj.3423), 2017-06-21

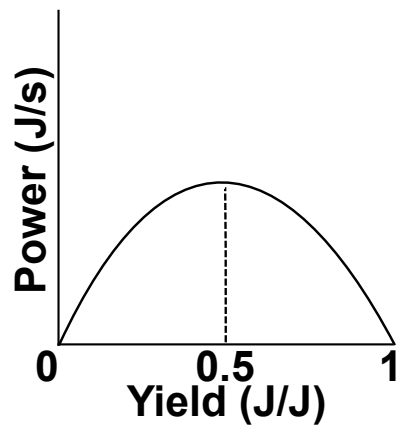

Supplement: Roach_et_al_Figure_S1.pdf [file Roach_et_al_Figure_S1.pdf]
